# Supplementary material for: Acetylation of a fungal effector that translocates host PR1 facilitates virulence
Source: eLife. 2022 Nov 14;11:e82628. doi: 10.7554/eLife.82628 (PMC9681213; doi:10.7554/eLife.82628)
Supplement: Figure 1—figure supplement 1—source data 2. [file elife-82628-fig1-figsupp1-data2.xlsx]

## Sheet: Fig.S1E
Figure 1-figure supplement 1-source data 2 Detailed Statistical Analysis in Figure 1-figure supplement 1 E.
Dataset
Time	WT			ΔFolSvp1
0	0	0	0	0	0	0
6	9	5	7	5	3	8
12	17	14	19	15	18	13
24	450	440	350	376	425	385
Statistical Analysis
Multiple t-test -one per row
Time (h)	Discovery?	P value	Mean1	Mean2	Difference	SE of difference	t ratio	df
0		> 0.9999	0	0	0	17.6462	0	16
6		0.925925	7	5.33333	1.66667	17.6462	0.094449	16
12		0.940706	16.6667	15.3333	1.33333	17.6462	0.0755592	16
24		0.322882	413.333	395.333	18	17.6462	1.02005	16
