# Supplementary material for: Acetylation of a fungal effector that translocates host PR1 facilitates virulence
Source: eLife. 2022 Nov 14;11:e82628. doi: 10.7554/eLife.82628 (PMC9681213; doi:10.7554/eLife.82628)
Supplement: Figure 2—source data 2. [file elife-82628-fig2-data2.xlsx]

## Sheet: Fig.2F
Figure 2-source data 2 Detailed Statistical Analysis in Figure 2F.
Dataset
Mock	WT	ΔFolSvp1	ΔFolSVP1-C	ΔFolSvp1-CQ	ΔFolSvp1-CR
0	4	4	5	3	1
0	3	1	4	3	3
0	4	3	3	4	4
0	5	2	2	4	2
0	5	3	4	5	4
0	4	3	5	4	2
0	5	2	4	5	3
0	5	4	5	5	3
0	3	2	5	4	3
0	5	3	3	5	3
Statistical Analysis
Repeated measures ANOVA summary								Number of families	1
Assume sphericity?	No							Number of comparisons per family	15
F	42.02							Alpha	0.05
P value	< 0.0001
P value summary	****							Tukey's multiple comparisons test	Mean Diff.	95% CI of diff.	Significant?	Summary
Statistically significant (P < 0.05)?	Yes
Geisser-Greenhouse's epsilon	0.5379							Mock vs. WT	-4.3	-5.225 to -3.375	Yes	****
R square	0.8236							Mock vs. ΔFolSvp1	-2.7	-3.766 to -1.634	Yes	****
								Mock vs. ΔFolSvp1-C	-4	-5.184 to -2.816	Yes	****
Was the matching effective?								Mock vs. ΔFolSvp1-CQ	-4.2	-5.086 to -3.314	Yes	****
F	1.585							Mock vs. ΔFolSvp1-CR	-2.8	-3.832 to -1.768	Yes	****
P value	0.149							WT vs. ΔFolSvp1	1.6	0.5148 to 2.685	Yes	**
P value summary	ns							WT vs. ΔFolSvp1-C	0.3	-1.460 to 2.060	No	ns
Is there significant matching (P < 0.05)?	No							WT vs. ΔFolSvp1-CQ	0.1	-0.5376 to 0.7376	No	ns
R square	0.05294							WT vs. ΔFolSvp1-CR	1.5	0.1762 to 2.824	Yes	*
								ΔFolSvp1 vs. ΔFolSvp1-C	-1.3	-2.602 to 0.002459	No	ns
ANOVA table	SS	DF	MS	F (DFn, DFd)	P value			ΔFolSvp1 vs. ΔFolSvp1-CQ	-1.5	-2.713 to -0.2867	Yes	*
Treatment (between columns)	132.6	5	26.52	F (2.689, 24.21) = 42.02	P < 0.0001			ΔFolSvp1 vs. ΔFolSvp1-CR	-0.1	-1.728 to 1.528	No	ns
Individual (between rows)	9	9	1	F (9, 45) = 1.585	P = 0.1490			ΔFolSvp1-C vs. ΔFolSvp1-CQ	-0.2	-1.771 to 1.371	No	ns
Residual (random)	28.4	45	0.6311					ΔFolSvp1-C vs. ΔFolSvp1-CR	1.2	-0.5402 to 2.940	No	ns
Total	170	59						ΔFolSvp1-CQ vs. ΔFolSvp1-CR	1.4	0.4528 to 2.347	Yes	**
Data summary
Number of treatments (columns)	6							Test details	Mean 1	Mean 2	Mean Diff.	SE of diff.	n1	n2	q	DF
Number of subjects (rows)	10
								Mock vs. WT	0	4.3	-4.3	0.2603	10	10	23.36	9
								Mock vs. ΔFolSvp1	0	2.7	-2.7	0.3	10	10	12.73	9
								Mock vs. ΔFolSvp1-C	0	4	-4	0.3333	10	10	16.97	9
								Mock vs. ΔFolSvp1-CQ	0	4.2	-4.2	0.2494	10	10	23.81	9
								Mock vs. ΔFolSvp1-CR	0	2.8	-2.8	0.2906	10	10	13.63	9
								WT vs. ΔFolSvp1	4.3	2.7	1.6	0.3055	10	10	7.407	9
								WT vs. ΔFolSvp1-C	4.3	4	0.3	0.4955	10	10	0.8562	9
								WT vs. ΔFolSvp1-CQ	4.3	4.2	0.1	0.1795	10	10	0.7878	9
								WT vs. ΔFolSvp1-CR	4.3	2.8	1.5	0.3727	10	10	5.692	9
								ΔFolSvp1 vs. ΔFolSvp1-C	2.7	4	-1.3	0.3667	10	10	5.014	9
								ΔFolSvp1 vs. ΔFolSvp1-CQ	2.7	4.2	-1.5	0.3416	10	10	6.211	9
								ΔFolSvp1 vs. ΔFolSvp1-CR	2.7	2.8	-0.1	0.4583	10	10	0.3086	9
								ΔFolSvp1-C vs. ΔFolSvp1-CQ	4	4.2	-0.2	0.4422	10	10	0.6396	9
								ΔFolSvp1-C vs. ΔFolSvp1-CR	4	2.8	1.2	0.4899	10	10	3.464	9
								ΔFolSvp1-CQ vs. ΔFolSvp1-CR	4.2	2.8	1.4	0.2667	10	10	7.425	9
