# Supplementary material for: Acetylation of a fungal effector that translocates host PR1 facilitates virulence
Source: eLife. 2022 Nov 14;11:e82628. doi: 10.7554/eLife.82628 (PMC9681213; doi:10.7554/eLife.82628)
Supplement: Figure 3—figure supplement 1—source data 1. [file elife-82628-fig3-figsupp1-data1.xlsx]

## Sheet: Sheet1
Sequence	# PSMs	# Proteins	# Protein Groups	Protein Group Accessions	Modifications	ΔCn	q-Value	PEP	IonScore	Exp Value	Charge	MH+ [Da]	ΔM [ppm]	RT [min]	# Missed Cleavages
HLYSLNANDEIHALVFSPNR	3	1	1	A0A0C4DHS7		0	0	1.696e-10	161.92	1.18929e-14	2	2310.16	0.534446	50.4456	0
NESSGEQSSSSEQSQEGEK	1	1	1	A0A0D2XX39		0	0	2.039e-08	159	1.79963e-14	2	2013.81	0.939939	8.63977	0
KLEEAGVTTTQADVEK	1	1	1	A0A2C8CXF1		0	0	1.01e-06	154.84	5.12321e-14	2	1718.87	-3.54296	24.545	1
WVGSVNELNAAYAADGYAR	1	3	1	A0A0C4DHU4		0	0	6.953e-10	151.61	1.51922e-13	2	2026.96	-0.588276	50.4378	0
ENTEGEYSGIEHVVVDGVVQSIK	2	1	1	A0A0D2XQN4		0	0	6.642e-09	135.5	6.78526e-12	2	2488.22	-0.109716	51.3769	0
NTDDSEIITQAWLWPR	2	4	1	A0A0C4DHU4		0	0	2e-06	132.83	1.03796e-11	2	1944.94	-1.56154	52.4286	0
TVLDGNNTELSSTELSGGAR	2	2	1	A0A0D2XCK5		0	0	5.053e-06	130.35	2.03842e-11	2	2020.97	-1.66266	43.5781	0
ASPNPTPASIVLVSSGLAIVPVAR	2	3	1	A0A0J9W1U0		0	0	1.509e-06	129.32	2.15773e-12	2	2316.32	-3.27622	52.609	0
SLSDGGLLVLLDGR	1	1	1	A0A0D2XEN9		0	0	5.062e-06	127.94	1.37393e-11	2	1414.79	-0.7006	52.5949	0
WLINTDGPALLEVVTDK	1	1	1	A0A0D2Y5K0		0	0	1.395e-07	126.23	2.09644e-11	2	1884.01	1.23044	52.7694	0
NESGSWTTNcTGLVSTSYK	1	2	1	A0A1D6QVK6	C10(Carbamidomethyl)	0	0	3.203e-07	123.72	9.67071e-11	2	2091.92	-6.33886	45.2043	0
TPAGGVSTTNVTVQNSPSR	2	1	1	A0A0D2X9J5		0	0	4.776e-08	123.71	7.12452e-11	2	1872.94	0.139075	26.3745	0
SDNAAFEEGSLIAGSLPIAEYGIIPK	2	1	1	A0A0D2YG03		0	0	3.758e-06	123.7	6.87433e-11	2	2662.36	1.17719	52.7882	0
PGAVDENGQAAPGR	1	1	1	A0A0D2XUU9		0	0	2.821e-07	120.68	1.28089e-10	2	1338.65	5.97721	14.8028	0
ETAESYLGETVNNAVVTVPAYFNDSQR	1	1	1	A0A0D2XA80		0	0	8.004e-09	120.59	2.74331e-10	2	2974.41	0.722061	52.0238	0
LDTEDWDEAEER	1	2	1	A0A0J9WKQ6		0	0	9.169e-06	120.55	9.40079e-11	2	1507.61	-2.63583	40.057	0
AQAATEAGLFTEIVPVEVPGGR	1	2	1	A0A0D2XPN3		0	0	5.153e-09	119.98	1.05033e-10	2	2212.17	4.73879	51.9574	0
DSVQNYDNYDATELASR	1	2	1	A0A0D2XZ45		0	0	3.617e-07	119.96	2.04525e-10	2	1960.85	-0.863898	42.5554	0
TFTTVADNQQTVQFPVYQGER	2	1	1	A0A0D2XAH7		0	0	1.289e-08	119.91	2.77644e-10	2	2429.17	0.453942	50.2189	0
QAGGTQFTGGALGAAVR	1	2	1	A0A0D2Y2S4		0	0	3.918e-07	118.99	1.62839e-10	2	1561.81	0.581588	42.1015	0
DQSAVDAFLNELDGTPNK	1	1	1	A0A0D2X829		0	0	5.482e-07	118.57	2.99535e-10	2	1933.91	-3.28506	52.5581	0
LNGGQPANFLDVGGGATPAAIR	1	4	1	A0A0J9VRH6		0	0	2.541e-08	118.52	2.12524e-10	2	2096.08	-2.9237	50.6909	0
VDLNEGGETSVR	1	2	1	A0A0J9V5H9		0	0	8.183e-05	117.97	1.97889e-10	2	1275.62	-1.05264	26.5314	0
VALTDNAIVEENLGK	1	1	1	A0A0D2Y2S2		0	0	4.739e-07	116.53	2.37449e-10	2	1585.84	-1.50922	49.5336	0
SNAFVEQEKEDEKER	2	2	1	A0A0D2XQE1		0	0	1.63e-05	116.19	5.02993e-10	2	1837.86	-0.255047	20.4868	2
DGLVDNETLGYFLAR	1	2	1	A0A0D2XD82		0	0	3.124e-06	115.56	4.53927e-10	2	1682.83	-2.29314	52.3026	0
LIGAPSGYVGYEDAGQLTEAVR	1	1	1	A0A0D2X918		0	0	2.428e-09	115.36	5.64534e-10	2	2266.14	0.627018	50.6586	0
LQGTNVEQAHQLINDSGLK	2	4	1	A0A0J9VRH6		0	0	1.15e-07	113.52	6.46938e-10	2	2065.07	-0.0750723	44.0582	0
VcDSDNTcSTINPGGTGK	3	1	1	A0A0D2Y5A1	C2(Carbamidomethyl); C8(Carbamidomethyl)	0	0	4.536e-07	112.85	8.87926e-10	2	1882.79	0.608854	21.419	0
AEGSIDASNLLKPALAR	2	1	1	A0A0D2X918		0	0	3.618e-08	112.68	3.67137e-10	2	1725.95	-1.25037	49.783	0
KNDLLAPDTGLLGAADK	2	2	1	A0A0D2X8I1		0	0	9.494e-09	112.3	5.35848e-10	2	1711.92	-0.889757	49.6853	1
EIASWcNDFPLPVEGWR	1	2	1	A0A0D2XVN0	C6(Carbamidomethyl)	0	0	5.879e-06	111.91	1.4919e-09	2	2075.95	-4.62135	52.4834	0
AFLTSYTDSSGSSVYGNR	1	1	1	A0A0D2Y2U1		0	0	3.553e-06	111.37	1.49174e-09	2	1911.88	2.06122	47.7502	0
DLASDEKDLAEQNINK	1	2	1	A0A0D2X961		0	0	3.131e-06	111.34	1.40513e-09	2	1802.88	0.273765	42.3555	1
IFASFNDTFVHVTDLSGR	1	1	1	A0A0D2Y2S1		0	0	6.21e-07	110.79	1.53022e-09	3	2026	-1.04822	51.2493	0
ILVDGPSANASLAVPR	2	1	1	A0A0D2XHH7		0	0	1.054e-06	110.35	5.43395e-10	2	1579.88	-1.32914	47.4209	0
KLDPEIADWFSFATEK	2	1	1	A0A0D2Y8Z1		0	0	9.839e-07	110.29	1.7754e-09	2	1896.93	-2.31006	52.2055	1
IETGVIKPGMVVTFAPSNVTTEVK	2	2	1	A0A2C8D0A4		0	0	5.434e-10	110.1	7.42212e-10	2	2517.36	-1.41632	50.5091	0
IALGNWTQQTTDGSK	1	2	1	A0A0D2XWG7		0	0	2.562e-06	110.04	1.52043e-09	2	1619.81	3.30012	45.9892	0
YDGSADIISNAScTTNcLAPLAK	2	1	1	A0A0D2XVJ4	C13(Carbamidomethyl); C17(Carbamidomethyl)	0	0	2.108e-08	110.01	2.87338e-09	2	2442.12	-2.56491	50.3685	0
IINEPTAAAIAYGLGAGK	2	1	1	A0A0D2XAH7		0	0	4.441e-07	109.47	8.92539e-10	3	1729.95	-1.06012	50.9494	0
YGQTSNEVYESAETK	1	2	1	A0A0J9UDY3		0	0	1.767e-05	109.27	2.06618e-09	2	1705.75	-1.29797	27.1337	0
TVPTESFFNFFSPPK	1	2	1	A0A0J9WH36		0	0	2.042e-06	109.11	2.20141e-09	2	1744.86	-0.682066	52.7735	0
SINPDEAVAYGAAVQAAILSGDTSSK	2	1	1	A0A0D2XA80		0	0	1.612e-08	109.1	2.78594e-09	2	2535.26	-0.597307	52.2429	0
DEEENNLNEVGYDDIGGcR	2	5	1	A0A0D2XZD6	C18(Carbamidomethyl)	0	0	1.11e-06	108.62	2.57564e-09	2	2197.9	2.28768	44.9651	0
LPLVGGHEGAGVVVAR	8	2	1	A0A0C4DHW5		0	0	2.414e-08	108.25	6.4787e-10	2	1530.87	-1.4429	41.0197	0
IINEPTAAAIAYGLDK	2	1	1	A0A0D2XA80		0	0	1.822e-06	107.79	1.57775e-09	2	1659.89	-1.01754	50.6483	0
LPAILNSLETENNGQK	1	1	1	A0A0D2YC97		0	0	1.936e-06	107.67	2.02124e-09	2	1740.91	1.28283	50.8787	0
LcYVALDFEQEIQTAAQSSSLEK	2	1	1	A0A2C8D194	C2(Carbamidomethyl)	0	0	1.551e-10	107.31	5.0105e-09	2	2630.26	-0.965017	52.4627	0
VLGAIGPNTILSAGVVDGR	2	1	1	A0A0D2Y8Z1		0	0	6.487e-07	107.2	7.18359e-10	2	1809.02	-1.9483	51.3718	0
TGGVVNTTTVTDNEEFR	2	2	1	A0A0D2XQI5		0	0	2.57e-07	106.85	4.15141e-09	2	1839.87	-0.52831	40.3041	0
QDEDATDDEYNLSR	1	1	1	A0A0D2XQA6		0	0	4.791e-06	106.4	2.59212e-09	2	1670.68	-0.822523	29.8559	0
IANPDAYASAAPAAAASGGAAAPAEAEK	2	1	1	A0A0D2XDL8		0	0	2.975e-09	106.2	6.29934e-09	2	2484.2	-0.30626	39.3903	0
GLTmSSTFIGNSTSIQELFK	1	2	1	A0A0C4DHT3	M4(Oxidation)	0	0	1.961e-06	106.11	5.35243e-09	2	2177.07	-4.22412	51.9559	0
DIGEVTGGNVEFPIIGDK	1	1	1	A0A0D2YGI9		0	0	6.771e-08	105.39	4.96763e-09	2	1859.94	-0.325505	51.5015	0
FGIVEGLMTTVHSYTATQK	2	1	1	A0A0D2XVJ4		0	0	1.315e-08	105.37	5.04284e-09	2	2083.05	-1.36092	51.8826	0
VYTTNSEVSGVVNITPAR	1	1	1	A0A0D2XYA8		0	0	1.552e-05	105.05	4.45779e-09	2	1906.99	-0.015792	45.7267	0
ESTSNETGATTEKPR	2	1	1	A0A0D2XX10		0	0	5.386e-06	104.89	5.01429e-09	2	1607.76	4.61824	8.92704	0
VSDEAATNFGcIVSDSHTR	2	1	1	A0A0D2XR18	C11(Carbamidomethyl)	0	0	2.308e-05	104.13	9.15883e-09	2	2065.93	3.38771	43.3202	0
HVELALWDTAGQEDYDR	1	1	1	A0A0C4DHX5		0	0	5.112e-08	103.99	9.83397e-09	2	2017.93	0.546977	50.3578	0
IEEEDKETILEAVK	2	1	1	A0A0D2XQC1		0	0	0.0006837	103.46	5.97332e-09	2	1645.85	0.466709	41.9508	1
LEEAGVTTTQADVEK	1	1	1	A0A2C8CXF1		0	0	6.233e-07	103.29	7.35803e-09	2	1590.79	0.54526	28.5117	0
ADNVPVEWEQVEVSGLEGAGR	2	1	1	A0A0D2XXN9		0	0	6.174e-09	103.27	1.14565e-08	2	2241.08	-0.728911	51.1842	0
IPLDYSWAQELGLIR	2	1	1	A0A0D2XUT9		0	0	5.137e-07	103.18	4.36602e-09	2	1773.96	1.82718	52.925	0
NQALIQTTLATSHGYVPK	2	1	1	A0A0D2Y2D2		0	0	4.072e-06	103.1	4.82432e-09	2	1942.04	-0.480744	46.2749	0
KADTGIAVEGASDAAR	1	3	1	A0A0J9WQU1		0	0	3.392e-05	102.99	7.38444e-09	2	1531.77	-0.00361489	23.1233	1
VPVITGFFGTVPGSLIDSGIGR	2	1	1	A0A0D2YG09		0	0	8.576e-10	102.92	2.86393e-09	2	2189.2	2.22104	52.9915	0
SIAEcLAEELINAAK	2	1	1	A0A0D2XUS0	C5(Carbamidomethyl)	0	0	2.882e-06	102.79	7.92445e-09	2	1631.83	-1.1252	52.9511	0
SATDVAQTELTPTHPIR	2	2	1	A0A0J9U6T0		0	0	2.323e-07	102.79	7.91919e-09	2	1836.95	0.744405	35.2665	0
ISNEPTTDSEGSSAEDGEIAVAER	2	2	1	A0A0D2Y544		0	0	6.679e-06	102.55	1.47954e-08	3	2464.09	-2.24631	35.9861	0
ITGQTITANPNK	1	2	1	A0A0D2Y589		0	0	1.066e-05	102.42	5.62772e-09	2	1257.68	0.0523735	20.325	0
KTPIASDIDFGYIASK	2	5	1	A0A0D2XZD6		0	0	1.172e-05	102.4	7.13833e-09	2	1725.9	-1.86326	49.9695	1
LINSSEIQSSLNAPK	2	2	1	A0A0D2XCJ2		0	0	2.327e-06	102.12	6.868e-09	2	1600.85	-1.58116	44.2155	0
LGANSANILVQDR	1	2	1	A0A0J9UTM6		0	0	6.307e-05	102.08	6.01168e-09	2	1370.74	-0.108198	40.8056	0
REEIMEGLSNVSAQIK	2	2	1	A0A0D2X8I1		0	0	1.821e-06	100.96	1.20051e-08	2	1803.93	-0.525693	49.5964	1
LATIVEIIDHK	2	1	1	A0A0D2XHH7		0	0	0.0002463	100.58	2.35808e-09	2	1251.73	-0.98385	50.6703	0
KLNLPLFPTTTIGSFPQTK	2	1	1	A0A0D2Y8Z1		0	0	1.088e-07	100.26	3.13178e-09	2	2103.19	1.12313	51.4266	1
mEEEVAALVIDNGSGMcK	1	1	1	A0A2C8D194	N-Term(Acetyl); C17(Carbamidomethyl)	0	0	4.546e-06	100.01	2.22786e-08	2	1994.89	-0.189531	53.3523	0
VLDVGcGVGGPAR	2	3	1	A0A0D2YH38	C6(Carbamidomethyl)	0	0	0.0001153	99.56	1.14978e-08	2	1256.64	-1.85851	34.6842	0
SADDEQSNVDAEEGAKPR	2	2	1	A0A0D2XQE1		0	0	2.97e-05	99.46	2.29368e-08	2	1917.84	-2.33451	16.0633	0
FLSQPFTVAQVFTGIEGK	1	1	1	A0A0D2YC97		0	0	6.189e-07	99.45	1.25419e-08	2	1969.04	-0.131583	52.6581	0
APTESYADIGGLEQQIQEVR	1	2	1	A0A0J9UND6		0	0	1.221e-09	99.43	2.57525e-08	2	2204.08	-0.556509	50.9455	0
ATPTEVSSILEQR	1	2	1	A0A0J9WFZ0		0	0	2.934e-05	98.92	1.67985e-08	3	1430.75	0.546555	48.7907	0
HLGFESIPVNVIPVTQQQVPER	2	1	1	A0A0D2XZ23		0	0	2.494e-10	98.7	1.1446e-08	2	2487.33	-2.47173	50.8079	0
ALGNSDESAHSSIR	2	1	1	A0A0D2XN28		0	0	0.0001309	98.65	2.01685e-08	2	1443.69	2.5209	15.7574	0
SLDQGVLLVTGPFK	1	1	1	A0A0D2X917		0	0	5.739e-05	98.39	8.46807e-09	2	1473.83	-1.57839	51.6326	0
IETAEEELNEEDQQLK	2	2	1	A0A0D2XWB2		0	0	1.304e-06	98.22	3.44636e-08	2	1917.89	-2.07831	44.5119	0
EAGAETVQIDEPVLVFDLPQK	2	1	1	A0A0D2Y8Z1		0	0	1.154e-08	97.82	2.39617e-08	2	2298.19	-0.0715366	52.0223	0
YPIEHGVVTNWDDMEK	2	1	1	A0A2C8D194		0	0	5.724e-08	97.79	3.45657e-08	2	1932.87	-4.12319	48.3859	0
AAGAPALDTNIETGGFDEK	1	2	1	A0A0J9WQU1		0	0	1.545e-06	97.77	3.36808e-08	2	1876.9	5.89731	47.6511	0
GVSNTDQAASIAGSIAAAHYVR	1	2	1	A0A0D2Y1Y2		0	0	5.03e-09	97.77	3.21434e-08	3	2159.08	-0.92442	49.757	0
QNPSELETSIAQALFDLESNTSDLK	2	1	1	A0A0D2XEN0		0	0	9.033e-08	97.56	4.47327e-08	3	2750.34	0.85596	53.9762	0
TPTQVALGASTGGQLDK	1	2	1	A0A1D6QVK6		0	0	5.319e-07	97.44	2.41154e-08	2	1643.86	-0.036755	36.7115	0
WIGGHGTTIGGVIVDSGR	2	1	1	A0A0D2YG02		0	0	1.621e-05	97.4	2.09175e-08	2	1781.93	1.83143	48.3724	0
NEEVAEEVDFDQR	1	1	1	A0A0D2XQV2		0	0	2.076e-05	97.37	2.59547e-08	2	1579.69	-0.676429	40.5267	0
ALLALIDLAESAPK	1	2	1	A0A0J9ULB1		0	0	3.117e-05	97.28	5.44369e-09	2	1424.84	-0.347045	52.6745	0
VDALGDAEDDADEEER	1	1	1	A0A0D2Y973		0	0	2.552e-06	97.26	2.44875e-08	2	1748.71	-0.507579	35.4741	0
GTVVcIGLPANAQFSAPVFDTVVR	2	1	1	A0A0C4DHW5	C5(wo)	0	0	9.182e-09	97.24	2.56956e-08	2	2518.31	-2.84394	52.1733	0
LLIPVDLAEYPSNEEIAATLLK	2	3	1	A0A0D2XUT8		0	0	2.794e-07	97.07	9.35541e-09	3	2412.33	0.62149	53.0512	0
EFNAAEcLQFVELYMPR	1	3	1	A0A0C4DHU4	C7(Carbamidomethyl)	0	0	5.472e-07	96.74	5.24083e-08	2	2116.98	0.713959	52.9943	0
LNKPSEIAEQIDTALR	2	4	1	A0A0C4DHU4		0	0	5.026e-07	96.73	1.79733e-08	2	1797.97	0.224455	50.2893	0
ATGGEGTAEDLSSK	1	1	1	A0A0D2Y1W8		0	0	6.054e-06	96.29	2.62924e-08	2	1322.61	-1.10606	18.161	0
APSNLPALFNATSQDIETLLAAQcHLGSK	2	1	1	A0A0D2Y970	C24(Carbamidomethyl)	0	0	2.216e-10	96.27	4.54746e-08	3	3067.55	-0.136769	53.3495	0
ALIDAAEIAGLR	1	4	1	A0A0D2XJR4		0	0	7.164e-06	96.12	1.41108e-08	2	1212.7	2.22149	51.1083	0
DFGSTWDLVEELNR	1	2	1	A0A1D6QVK6		0	0	8.443e-05	95.51	4.98691e-08	2	1680.78	-1.98874	52.7236	0
TGNNLSAVK	1	2	1	A0A1D6QVK6		0	0	0.001178	95.4	3.47093e-08	2	903.49	0.705673	15.7381	0
AIYcDLEPNVVDEVR	1	1	1	A0A0D2XAP0	C4(Carbamidomethyl)	0	0	1.024e-05	95.17	5.88259e-08	2	1791.86	-0.574804	50.3723	0
LLIISNPVNSTVPIVK	1	2	1	A0A0D2Y2C5		0	0	3.73e-06	94.86	1.25736e-09	2	1707.04	-0.792347	51.1606	0
EGEDGPITGFVR	1	1	1	A0A0D2Y1W8		0	0	3.396e-05	94.69	4.13494e-08	2	1276.61	-2.30461	46.4686	0
DANGNFLVSLIEGDGIGPEISQSVK	1	1	1	A0A0D2XQN4		0	0	0.0003567	94.61	6.40853e-08	2	2559.29	-0.409915	53.5858	0
VEFENPLILLSEK	1	2	1	A0A0D2XVI4		0	0	6.502e-06	94.52	2.85549e-08	2	1530.84	-0.307882	52.7545	0
AIAPNLTALVGYLVGAR	2	1	1	A0A0D2Y973		0	0	4.834e-07	94.47	7.96718e-09	2	1698.99	-1.2458	53.9444	0
LALTTAEYYAYQLEK	2	1	1	A0A0D2XAN8		0	0	9.375e-06	94.45	5.71224e-08	2	1776.91	1.76466	51.2257	0
TLTAVHDAILEDLTYPVEIVGK	2	1	1	A0A0D2XEN0		0	0	8.402e-07	94.24	3.19633e-08	2	2397.29	-1.6144	52.3149	0
NDILDHDVDLAELAR	1	1	1	A0A0D2Y968		0	0	3.316e-05	94.13	6.49097e-08	3	1708.85	-0.684179	50.6559	0
ENITNNWTTTGQELGR	2	2	1	A0A0D2XN77		0	0	6.166e-07	93.67	8.79261e-08	2	1833.87	-2.75374	46.4672	0
FTQAGSEVSALLGR	1	1	1	A0A0D2YC97		0	0	4.659e-05	93.66	4.71427e-08	2	1435.75	-2.95166	50.5893	0
SALANEAGYVDVNDNTLR	1	1	1	A0A0D2Y128		0	0	8.313e-05	93.6	8.98131e-08	2	1921.92	-2.34738	46.2693	0
GASADLAVVEAR	1	2	1	A0A0J9WNS0		0	0	0.0001167	93.58	5.36323e-08	2	1158.61	-1.91854	37.2708	0
TVFNNLGPLANPVEDVLEAR	2	1	1	A0A0D2X990		0	0	9.13e-06	93.45	5.72727e-08	3	2168.13	0.120649	52.8006	0
GQNYSPSQIGGFVLNK	1	1	1	A0A0D2XX39		0	0	4.703e-06	93.34	7.11854e-08	2	1708.86	-1.12378	50.3362	0
AVENTNYAIELGK	1	1	1	A0A0D2XNN3		0	0	2.406e-05	93.31	6.19257e-08	2	1421.73	-0.974656	41.5437	0
KSVNEPVQTGLK	2	2	1	A0A0J9WFZ0		0	0	1.148e-05	93.19	3.6004e-08	2	1299.73	4.3995	19.8409	1
DASNADFITWVR	1	1	1	A0A0D2XJN8		0	0	0.0008162	93.15	6.84378e-08	2	1394.67	-3.50237	51.5687	0
TVTVNTDAGADQK	1	1	1	A0A0D2XWI0		0	0	1.582e-05	92.89	6.00146e-08	2	1319.65	1.04414	17.5963	0
LPAGGVGDMVMATVK	1	1	1	A0A0D2XB71		0	0	7.58e-07	92.86	6.24234e-08	2	1445.74	-3.54499	50.7523	0
HLVEVAcGAALAPAYR	2	2	1	A0A0D2XCL5	C7(Carbamidomethyl)	0	0	3.243e-06	92.69	7.11593e-08	2	1697.87	-3.13117	42.4851	0
HNSAQIDGLAAK	1	1	1	A0A0D2XJN8		0	0	3.178e-06	92.43	5.73765e-08	2	1224.63	1.13322	20.8565	0
MIVPMVDVIFADVAQPDQAR	1	1	1	A0A0J9UMZ4		0	0	2.372e-05	92.19	1.15837e-07	2	2215.12	-2.89436	53.5873	0
LNEETGLIDYDK	1	1	1	A0A0D2XHS3		0	0	3.964e-05	92.13	9.46694e-08	2	1409.68	-0.54109	42.2624	0
ATGTTVVSDSGDFASIGK	1	1	1	J9MJK9		0	0	0.0002014	91.98	1.15935e-07	2	1712.83	-3.79676	44.1924	0
TLEPTTILTYLFK	1	2	1	A0A0D2XEP8		0	0	1.294e-05	91.97	3.06547e-08	2	1539.87	0.362329	53.7186	0
VVAEPFDVSDLEALPAWVEK	2	1	1	A0A0J9W1U0		0	0	3.098e-07	91.96	1.05517e-07	2	2214.13	-1.27669	52.7223	0
EAFEGVFEEVPAAFTPEER	1	2	1	A0A0D2X961		0	0	8.311e-07	91.91	1.60463e-07	2	2154	-2.25672	52.1123	0
RLPDSAIDLVDEAAAAVR	1	1	1	A0A0D2XZI9		0	0	1.891e-06	91.9	6.37261e-08	3	1882	0.412325	51.9956	1
TVADELEVTEGMR	1	2	1	A0A0D2XVI4		0	0	0.0004395	91.81	9.22184e-08	2	1449.69	-1.21946	48.5884	0
AGIDVIQVDEPALR	1	1	1	A0A0D2Y8Z1		0	0	2.775e-05	91.68	5.10761e-08	2	1495.81	-0.979474	50.4629	0
ELTKEEAYIADLDAK	1	1	1	A0A0D2XUT8		0	0	6.707e-05	91.54	1.0862e-07	2	1708.86	-1.1371	46.7837	1
VEGSSGGDSEVQR	1	1	1	A0A0D2Y496		0	0	3.41e-06	91.46	7.97021e-08	2	1306.59	0.226982	10.9437	0
ENVLQPLLVSTSAIELAAETVK	2	1	1	A0A0D2X9D6		0	0	6.44e-06	91.46	3.71181e-08	3	2325.28	-4.8768	53.9181	0
NNNWSGADAScLVSAAK	3	1	1	A0A0D2Y5A1	C11(Carbamidomethyl)	0	0	3.521e-06	91.36	1.38003e-07	2	1764.79	-2.77282	45.3742	0
GLPMAATFVGNSTAIQEIFK	1	2	1	A0A0C4DHQ2		0	0	4.057e-07	91.31	1.07871e-07	2	2095.08	-4.28692	52.7032	0
FDSNcYIALTNK	1	1	1	A0A0D2YG05	C5(Carbamidomethyl)	0	0	2.053e-05	91.18	1.19265e-07	2	1445.67	-1.66392	45.7978	0
NLANPTALLLSSIMMLR	2	1	1	A0A0D2XQN4		0	0	1.498e-05	91.18	4.98781e-08	2	1858.03	-0.466909	54.7844	0
QPGATLEAGDILGILALDDPSR	1	1	1	A0A0D2XEN9		0	0	4.245e-05	91.14	9.14881e-08	2	2222.17	1.04289	53.0977	0
SVNPDEAVAIGAAIQGAVLSGEVK	1	1	1	A0A0D2XX39		0	0	4.9e-06	91.04	8.14199e-08	2	2295.22	-0.814104	52.7276	0
TSQINSVDFHSTHcK	3	4	1	A0A0C4DHU4	C14(Carbamidomethyl)	0	0	2.505e-05	90.94	1.59344e-07	2	1760.8	0.522951	21.748	0
DAPIINLSPDAPEEAQVAK	1	1	1	A0A0D2XLD1		0	0	6.459e-08	90.94	1.26444e-07	2	1978.01	-1.05233	50.2675	0
AVcMLSNTTAIAEAWSSLSLK	1	1	1	A0A0D2XAP0	C3(Carbamidomethyl)	0	0	2.699e-06	90.91	1.70748e-07	2	2253.12	-2.57367	52.958	0
NAPGGAAAHASNVTR	1	2	1	A0A0D2XQE1		0	0	1.063e-05	90.87	1.12539e-07	2	1393.69	-0.356426	11.8155	0
DFLSGTcLYLSSLTK	2	2	1	A0A0J9UH90	C7(Carbamidomethyl)	0	0	1.109e-05	90.79	1.38099e-07	2	1704.84	-5.0775	52.5976	0
AFADAYGAVSDDFAYR	1	1	1	A0A0J9VCC4		0	0	3.995e-06	90.57	1.47292e-07	2	1738.77	-2.25332	50.7482	0
NITGVETSPVTALNLLQLAPGGHLGR	1	2	1	A0A0D2XCJ2		0	0	2.013e-09	90.56	3.8677e-08	3	2628.45	0.221265	52.1706	0
VPELLTQLLDDLK	1	1	1	A0A0D2Y973		0	0	1.155e-06	90.18	4.13502e-08	2	1496.86	-0.494676	53.943	0
VVGETVESVITPR	1	2	1	A0A0D2Y2S4		0	0	4.743e-05	90.1	8.54594e-08	2	1385.76	-0.840378	45.7197	0
LAAITALGDSLEFVGNNFK	2	1	1	A0A0D2XQA6		0	0	1.235e-07	90.1	1.1121e-07	2	1980.05	1.28328	52.9236	0
GVDTGAVGATLPSPAR	1	1	1	A0A0D2XQV2		0	0	2.057e-06	90.02	9.29211e-08	2	1468.77	-0.970775	39.1475	0
EEGPALYYVDSDGTR	1	1	1	A0A0D2XDF7		0	0	0.0005201	90.02	1.60011e-07	2	1671.75	0.846377	45.6853	0
SQDPDQGFSTFFSETGQGK	1	1	1	A0A0D2XAP0		0	0	1.514e-07	89.93	2.16715e-07	2	2062.9	-0.457843	50.9715	0
GIQGATSHALGQNFSK	2	1	1	A0A0D2XWU1		0	0	1.942e-06	89.92	1.41788e-07	2	1615.82	2.42485	31.2235	0
AIETVETAIQK	2	1	1	A0A0D2Y8Z1		0	0	0.0003195	89.91	9.20377e-08	2	1202.66	1.43432	35.0022	0
KGELAAGNNVDKK	1	2	1	A0A0D2XGU4		0	0	2.496e-06	89.88	1.10512e-07	2	1343.73	0.272163	8.92562	2
APEALFQPSVLGLESGGIHVTTFNSIMK	1	1	1	A0A2C8D194		0	0	6.078e-10	89.87	1.38175e-07	3	2943.53	-0.622977	52.0981	0
LGFSEQcIEEAKDTIQK	2	4	1	A0A0J9VRH6	C7(Carbamidomethyl)	0	0	7.546e-07	89.61	2.18135e-07	2	1995.97	1.22847	49.6018	1
LVNDSNFVGSTIEGR	2	1	1	A0A0J9WGD0		0	0	8.336e-05	89.53	1.59901e-07	2	1607.81	1.87599	46.3082	0
LDAQFTQIVER	1	1	1	A0A0D2XEN9		0	0	6.997e-05	89.42	1.28974e-07	2	1319.7	-0.254106	49.5324	0
EYEALGTAGGLYHFR	2	1	1	A0A0D2XR18		0	0	1.538e-06	89.18	2.1179e-07	2	1683.81	0.475582	49.6406	0
LcAAIAGGADEIYIKPGSR	2	1	1	A0A0J9UMZ4	C2(Carbamidomethyl)	0	0	3.469e-07	88.83	2.06e-07	3	1962	-7.23689	45.2167	0
TNFETAVAALEHAK	1	1	1	A0A0D2X8K5		0	0	4.294e-05	88.77	1.88888e-07	3	1501.76	-1.36835	50.5227	0
VPTANVSVVDLTVR	2	1	1	A0A0D2XVJ4		0	0	1.202e-06	88.76	7.07137e-08	2	1469.83	0.10461	50.2151	0
NEcDGALFGAVSSPTQAVK	1	1	1	A0A0D2Y4W9	C3(Carbamidomethyl)	0	0	8.25e-07	88.75	2.95108e-07	2	1950.92	-1.44439	49.8323	0
QETTTTTTTTTTTTTK	1	1	1	A0A0D2XJU2		0	0	2.063e-06	88.73	2.55543e-07	2	1717.84	0.827423	11.5617	0
ALEEPQRPFLAILGGAK	2	2	1	A0A0D2Y5W3		0	0	9.5e-08	88.59	6.28831e-08	2	1810.02	-1.34159	51.1567	0
FEGQEVEVAQR	1	2	1	A0A0D2XD82		0	0	8.738e-05	88.42	1.66613e-07	2	1291.63	-1.54168	28.4222	0
AADEGGLSQALVSR	1	1	1	A0A0D2XMV7		0	0	4.339e-06	88.32	1.8956e-07	2	1373.7	-0.576418	39.9132	0
SINPDEAVAYGAAVQAGILSGK	2	1	1	A0A0D2XAH7		0	0	2.789e-07	88.24	2.03807e-07	2	2131.11	1.71542	51.7634	0
LPVQDVcLSVPPWFTDVQR	1	4	1	A0A0D2XJR4	C7(Carbamidomethyl)	0	0	1.087e-08	88.11	2.6053e-07	2	2256.14	-1.73774	52.4152	0
LTEAAETDDGER	1	2	1	A0A0J9USN5		0	0	0.0001502	87.95	1.71547e-07	2	1306.58	0.880618	15.6045	0
AQSIVEGSDLLLTIGALK	2	4	1	A0A0C4DHU4		0	0	1.074e-07	87.84	5.55798e-08	2	1828.04	-0.228317	52.5431	0
ANcIDSTAPAAEVFANEVQK	1	1	1	A0A0J9UMZ4	C3(Carbamidomethyl)	0	0	1.581e-06	87.81	4.19489e-07	2	2135	-1.416	50.3139	0
LESGESSDIANEK	1	1	1	A0A0D2XJU8		0	0	6.333e-05	87.76	2.16235e-07	2	1378.63	-3.86907	20.1379	0
GNEGEIQTVAGATITQR	1	1	1	A0A0D2XE22		0	0	0.0003175	87.74	2.66199e-07	2	1744.88	-1.54335	42.047	0
ITScSLVFHGR	2	1	1	A0A0D2XK80	C4(Carbamidomethyl)	0	0	9.999e-05	87.7	2.03619e-07	2	1276.64	-1.48225	33.7434	0
SLFVDLDPSPIDEIR	1	1	1	A0A0D2X9U0		0	0	7.373e-06	87.53	2.60402e-07	2	1715.89	-0.0430889	52.1109	0
YGDQTLVDGVLK	1	2	1	A0A0D2XPN3		0	0	0.0001323	87.44	2.18706e-07	2	1307.68	0.404288	49.6749	0
VFGSEPSFEGADDAK	2	1	1	A0A0D2XMV9		0	0	1.158e-05	87.37	2.7952e-07	2	1555.69	-1.78648	40.9129	0
DGGELDEGWPAANQDAR	1	1	1	A0A0D2Y7B4		0	0	4.562e-05	87.31	3.05888e-07	2	1800.78	0.0214805	44.3626	0
NPQDISQEEYASFYK	3	2	1	A0A0D2XK76		0	0	2.224e-06	87.16	3.74907e-07	2	1818.81	-1.86189	47.6826	0
TNEVAGDGTTTATVLAR	2	1	1	A0A0D2XVI4		0	0	1.306e-05	87.1	3.23382e-07	2	1676.84	-0.383667	35.1305	0
DVAVGAGPTALINAGFVEAIR	1	1	1	A0A0D2Y4H6		0	0	1.424e-05	87.09	1.55175e-07	2	2041.11	0.380581	52.5318	0
QVAGSYVQQGASNK	1	1	1	A0A0D2XX28		0	0	2.018e-05	87.06	2.98036e-07	2	1436.71	-0.0453442	19.4792	0
QPSSSAAGSSELSGAK	1	1	1	A0A0D2XAY6		0	0	3.229e-05	87	2.7804e-07	2	1463.71	6.00598	17.879	0
QLEDSSLSTEETDEIK	1	1	1	A0A0D2XEN9		0	0	5.196e-07	86.9	4.01814e-07	2	1823.84	-0.841712	38.5269	0
aDEYDAEQAAELKR	3	1	1	A0A0D2X9U6	N-Term(Acetyl)	0	0	5.787e-05	86.89	3.50658e-07	2	1650.76	-0.282818	37.8564	1
SYELPDGQVITIGNER	2	1	1	A0A2C8D194		0	0	7.683e-07	86.82	3.72994e-07	2	1790.89	-1.62244	50.6807	0
aDEYDAEQAAELkR	1	1	1	A0A0D2X9U6	N-Term(Acetyl); K13(GlyGly)	0	0	2.201e-05	86.81	4.08352e-07	2	1764.8	-3.07684	38.0299	1
AVISESTPEGASAPSFK	1	1	1	A0A0D2XNE2		0	0	0.0002748	86.76	3.42547e-07	2	1677.83	-0.530673	38.9052	0
LGTSAGVTTVITR	1	6	1	A0A0J9UBY2		0	0	1.72e-05	86.71	1.0132e-07	2	1275.73	1.32462	37.82	0
GADSLNASVLAK	1	2	1	A0A0D2XCL5		0	0	8.264e-05	86.66	2.26455e-07	2	1145.62	2.12686	36.5967	0
ISVDESVQNDDGTTTTTK	2	1	1	A0A0J9UMZ4		0	0	1.337e-06	86.6	4.65009e-07	2	1910.88	-1.91402	27.9432	0
IWTFGPDGTGANLLVDQTK	1	2	1	A0A0J9UYI6		0	0	2.621e-07	86.41	3.86152e-07	2	2033.03	-0.935194	51.7324	0
NAETDLYEVEIR	2	1	1	A0A0J9U592		0	0	5.938e-05	86.36	3.30047e-07	2	1451.7	-1.16328	49.7482	0
DALSGAEVVLIPAGVPR	2	2	1	A0A0D2Y2C5		0	0	6.793e-06	86.3	9.96297e-08	2	1663.94	-0.916143	51.6946	0
kSVNEPVQTGLK	1	2	1	A0A0J9WFZ0	K1(GlyGly)	0	0	0.003761	86.28	2.12425e-07	2	1413.76	-4.73293	20.7141	1
NDLLAPDTGLLGAADK	1	2	1	A0A0D2X8I1		0	0	2.167e-06	86.25	2.75316e-07	2	1583.82	-3.27436	50.8367	0
IYSPNVLTLTLVDLPGLTK	2	2	1	A0A0D2XCK5		0	0	3.231e-05	86.25	4.80203e-08	2	2057.19	-1.11413	53.3814	0
IEDVTPTPSDSTR	2	2	1	A0A0D2Y2S1		0	0	8.885e-05	86.21	3.59237e-07	2	1417.68	-1.12058	24.2151	0
TSTSEGSSLLSEDK	1	1	1	A0A0D2XUH4		0	0	6.848e-06	86.17	3.45652e-07	2	1440.67	-1.77226	30.2572	0
GHYTEGAELVDQVLDVVR	1	3	1	A0A0C4DHT3		0	0	3.553e-06	86.15	4.31815e-07	3	2000.01	-0.994225	52.078	0
ALQDGPQVVVGTPGR	4	1	1	A0A0D2XDK5		0	0	3.998e-05	86.08	2.2367e-07	2	1493.81	2.14153	37.6842	0
SPNSNTYIVFGEAK	1	1	1	A0A0D2XHH6		0	0	0.0001136	85.86	4.06508e-07	2	1526.75	-1.29142	46.8511	0
EASScTLTQLTSK	2	1	1	A0A0D2XBZ0	C5(Carbamidomethyl)	0	0	5.151e-05	85.8	3.89543e-07	2	1425.69	3.83694	35.8212	0
EIVDNLNNADLDK	1	1	1	A0A0D2XEA1		0	0	6.225e-05	85.7	3.9431e-07	2	1472.72	0.0167167	39.6864	0
TTGIVLDSGDGVTHVVPIYEGFALPHAIAR	2	1	1	A0A2C8D194		0	0	6.94883e-11	85.59	2.49418e-07	3	3105.64	0.325624	51.3108	0
SLSNDWEDHLAVK	2	2	1	A0A0D2XK76		0	0	0.0001116	85.58	4.28184e-07	2	1513.73	-0.654576	45.9933	0
DATSEEFSATAEHK	2	7	1	A0A0J9UPQ3		0	0	9.602e-05	85.25	3.58246e-07	2	1522.66	-3.10971	24.7761	0
TKGEAGTGDVVEAVR	2	1	1	A0A0D2XXD6		0	0	8.363e-05	85.21	3.94252e-07	2	1488.76	-3.96591	24.5435	1
TVETALLATSQEQR	2	2	1	A0A0D2XD82		0	0	1.979e-05	85.18	3.98653e-07	2	1546.81	-0.877659	43.659	0
NSEYFVDWIPNNVQTSVcSVPPR	2	2	1	A0A0C4DHQ2	C18(Carbamidomethyl)	0	0	7.151e-05	85.14	8.94553e-07	2	2708.27	-2.17605	51.7353	0
gDVAVENPANQVAPHK	1	1	1	A0A0D2Y8T0	N-Term(Acetyl)	0	0	0.0002706	85.08	5.06198e-07	2	1687.84	1.00367	35.8454	0
LDSFVTELYTSAK	1	1	1	A0A0D2XUH4		0	0	1.134e-05	85.02	4.34074e-07	2	1473.75	-1.05054	51.2911	0
NAYLGGmEAEDGIGINTPAK	2	1	1	A0A0D2Y5A1	M7(Oxidation)	0	0	2.284e-05	84.84	7.36246e-07	2	2036.96	0.930312	43.0257	0
SKVDELKPEFPAVGK	2	1	1	A0A0C4DHS7		0	0	0.000184	84.63	2.9683e-07	2	1643.9	-0.0457124	38.5833	1
QVLDTEAVEEDPAK	1	1	1	A0A0D2XQ76		0	0	3.463e-06	84.59	5.3816e-07	2	1543.75	-1.65179	35.5219	0
NDQAVTEWYETER	1	1	1	A0A0D2XEN9		0	0	0.0001048	84.55	5.2034e-07	2	1640.72	-1.76349	45.6691	0
VGSTSENITQK	1	1	1	A0A0D2XDN9		0	0	0.0003598	84.49	3.96351e-07	2	1163.59	0.277134	14.6594	0
VEDLQDSDVGTR	1	2	1	A0A0D2XUN7		0	0	3.99e-05	84.47	4.35516e-07	2	1333.63	2.66432	25.5315	0
WLAIDILPGEAISQDAVK	1	2	1	A0A0D2XDM0		0	0	4.012e-08	84.28	2.89642e-07	2	1939.05	-1.68677	52.525	0
FDFNEDQMAVEK	1	1	1	J9MJK9		0	0	0.0002606	84.18	4.57378e-07	2	1472.64	-0.181561	47.5268	0
TNASAIQLSFAGIGK	1	2	1	A0A0J9UDY3		0	0	5.087e-06	84.18	3.22934e-07	2	1477.8	0.798701	50.8429	0
AEDGAVILLENLR	2	3	1	A0A0D2Y5W3		0	0	9.553e-06	83.98	3.07957e-07	2	1412.77	0.0937386	51.9464	0
EEPALTALALLTR	2	3	1	A0A0J9V792		0	0	0.0007253	83.97	1.92416e-07	3	1397.8	0.523332	52.7749	0
IAYFADGSTIGYNK	1	2	1	A0A0J9V258		0	0	1.103e-05	83.97	5.6903e-07	2	1519.74	-2.12651	47.3374	0
sNSNLQKPIDVAEYLFK	2	3	1	A0A0C4DHU4	N-Term(Acetyl)	0	0	2.137e-06	83.88	6.07343e-07	2	2008.04	-1.78011	52.2988	0
GYDSAGLAIDGDKK	1	1	1	A0A0D2X8I1		0	0	0.0002052	83.87	6.231e-07	2	1409.69	-2.20023	29.1173	1
NTASNVNSAEGLQLK	1	2	1	A0A0D2XUR0		0	0	7.198e-05	83.81	6.04942e-07	2	1545.78	-2.68532	33.7751	0
VEVPSNIDVILcAPK	1	1	1	A0A0D2XMW0	C12(Carbamidomethyl)	0	0	6.398e-06	83.8	3.6747e-07	2	1653.88	-1.99051	51.1896	0
SLQPGTVLILLAGR	2	1	1	A0A0D2X917		0	0	0.0005462	83.79	3.6978e-08	3	1437.88	-0.426185	52.6606	0
FVGSGVSGGEEGAR	1	2	1	A0A0J9U515		0	0	0.0005996	83.69	4.90415e-07	2	1308.62	0.105677	22.9385	0
VESVIPELFGGSADLTGSNLTR	2	4	1	A0A0D2XN20		0	0	1.29e-07	83.66	7.12306e-07	2	2262.16	-2.22518	52.2672	0
VGLTEAEVINR	1	2	1	A0A0J9WQU1		0	0	0.0002114	83.64	4.21701e-07	2	1200.66	-0.482117	40.0403	0
NAGTAEFLVDQQNR	2	3	1	A0A0J9WHE4		0	0	3.347e-05	83.53	6.63417e-07	2	1562.75	-4.63833	40.5702	0
TNDSSNTGAASNGEAK	1	1	1	A0A0D2XXD6		0	0	3.302e-05	83.51	5.44592e-07	2	1523.66	-0.396219	8.32337	0
KDDSLEIPQDSVNR	2	2	1	A0A0D2Y2S4		0	0	4.274e-05	83.5	7.81026e-07	2	1615.79	-2.03818	32.3062	1
GDADDNAATEIDVTK	1	3	1	A0A0D2XVM8		0	0	6.591e-05	83.46	6.71717e-07	2	1534.68	-2.07206	31.0515	0
AGSAAGGAGSGSGGDNSGGDGGR	1	1	1	A0A0D2XX10		0	0	3.19e-07	83.41	5.79167e-07	2	1778.73	-0.685197	8.36981	0
ELAEEGYSGVEVR	2	1	1	A0A0D2XZN4		0	0	4.589e-05	83.34	6.6829e-07	2	1437.68	-0.739654	37.415	0
TTAEELYQTFVDPQR	1	2	1	A0A0D2XQI5		0	0	1.209e-06	83.23	9.32132e-07	2	1797.86	-4.6322	51.7258	0
VDAEYGNQGLGFR	1	1	1	A0A0J9UWC7		0	0	5.368e-05	83.21	6.94328e-07	2	1425.67	-3.22032	41.2883	0
AGFAGDDLPK	1	4	1	A0A0J9UU28		0	0	0.001582	83.05	4.68448e-07	2	990.489	-0.0908939	35.2486	0
AVIQELEGAYGLLIK	2	1	1	A0A0D2X8I1		0	0	3.084e-06	83	1.65642e-07	2	1616.92	-0.926014	52.6567	0
FLEDNVDAGDAELLK	1	1	1	A0A0D2XEN9		0	0	1.557e-05	82.94	8.28046e-07	2	1648.8	-1.32363	50.3551	0
IVDGVASAANNR	1	1	1	A0A0D2XUH4		0	0	0.0006172	82.82	4.96276e-07	2	1186.62	1.0793	22.1928	0
NLSGEGTATAAEIK	2	1	1	A0A0D2XX39		0	0	2.202e-05	82.82	6.4751e-07	2	1361.69	-1.02273	30.107	0
NAPGTGEDDPDTSK	1	1	1	A0A0D2XAB7		0	0	6.384e-05	82.82	5.04896e-07	2	1403.59	-1.10967	11.8617	0
IIcTDPQTGEPYPLR	2	1	1	A0A0D2XEN9	C3(Carbamidomethyl)	0	0	0.0004415	82.78	9.08417e-07	2	1759.88	4.80906	43.0908	0
WQSETQEAAASSK	1	1	1	A0A0D2XI04		0	0	5.313e-05	82.65	6.86397e-07	2	1422.65	-0.712847	19.022	0
AELDALLSMEELSK	1	1	1	A0A0D2XEG6		0	0	4.614e-05	82.61	7.82665e-07	2	1548.78	-4.80846	52.0609	0
FSNEVTQDDVDEALR	1	1	1	A0A0D2XCS2		0	0	2.088e-05	82.59	1.00908e-06	2	1737.79	-2.75747	46.242	0
YYGGNQHIDQIER	1	2	1	A0A0D2XVN0		0	0	4.267e-05	82.58	8.62897e-07	2	1592.74	-0.654893	28.2027	0
ESIGQLEQAQVVSER	1	2	1	A0A0D2XD91		0	0	9.387e-05	82.57	8.38325e-07	2	1672.85	1.10291	43.3612	0
QVSYEEYLAQQAEK	1	1	1	A0A0D2XEE2		0	0	2.949e-05	82.45	1.03759e-06	2	1685.8	-0.6196	48.0956	0
AVQIEGQPIILTGAPALNNLLGR	1	1	1	A0A0D2XEN9		0	0	4.843e-07	82.11	1.21805e-07	3	2358.34	-3.74559	52.444	0
NVTTGEWGAVPAVAR	1	1	1	A0A0D2XIG0		0	0	6.355e-05	82.1	6.83187e-07	2	1527.8	3.14895	47.998	0
VDDDSSENDGSSK	1	1	1	A0A0D2XWC9		0	0	8.75e-06	82.05	4.22892e-07	2	1354.53	0.859972	7.97836	0
QSVLSAITSTQQR	2	5	1	A0A0D2XDB5		0	0	7.34e-06	82.05	5.99097e-07	2	1418.76	0.24538	47.3196	0
GNVGFVFTNDDLK	1	1	1	A0A0D2XDL8		0	0	2.363e-05	81.98	9.76476e-07	2	1425.7	-1.26045	50.6496	0
GESVLIHSAAGGVGQTAIR	2	2	1	A0A1D6QVK6		0	0	2.056e-06	81.97	5.73386e-07	3	1822.98	0.336803	38.6831	0
LIDESDLDLEK	1	1	1	A0A0D2X8I1		0	0	0.0001527	81.79	8.08897e-07	2	1289.65	-0.874354	46.0901	0
TIQTLELELQEIMK	2	2	1	A0A0D2X8I1		0	0	1.848e-05	81.72	6.31589e-07	2	1688.91	0.509925	53.0552	0
SNIGHLEGASGLAGLVK	2	2	1	A0A1D6QVK6		0	0	6.329e-07	81.65	4.58905e-07	2	1622.88	-0.962617	49.6031	0
MTTEELQAVQGR	1	2	1	A0A0J9WH31		0	0	0.0001249	81.58	8.98666e-07	2	1362.67	-1.9714	33.9559	0
LDQTADFEcGVK	1	1	1	A0A0D2XUT8	C9(Carbamidomethyl)	0	0	0.0001404	81.52	8.7241e-07	2	1382.63	-0.313578	35.0049	0
TTTScSLAIQLAK	1	1	1	A0A0D2XNK3	C5(Carbamidomethyl)	0	0	0.0001338	81.49	8.02887e-07	2	1393.74	-0.140729	43.6285	0
GASAQDTGAPITIPVGPATLGR	1	1	1	A0A0D2YC97		0	0	3.461e-06	81.47	7.08576e-07	2	2050.09	-1.56778	50.6273	0
LNAADYNDVER	1	2	1	A0A0J9WL27		0	0	0.0006117	81.38	8.55505e-07	2	1279.6	2.85012	29.37	0
MLAEEYGTASNIK	1	4	1	A0A0D2XDB5		0	0	0.0001102	81.36	1.01811e-06	2	1426.69	-0.28562	36.5628	0
EVSEGSSETAIR	1	1	1	A0A0D2YG01		0	0	0.0002573	81.32	8.77368e-07	2	1264.61	4.6324	19.8437	0
TPQPDWTTIAPALPVLSK	2	1	1	A0A0D2XCN6		0	0	2.162e-06	81.31	5.13656e-07	2	1935.06	-0.777649	51.9859	0
HILNcLVQNEPGVLSR	2	1	1	A0A0D2XVM0	C5(Carbamidomethyl)	0	0	8.867e-06	81.28	9.38735e-07	2	1848.97	-0.887573	48.8958	0
ALVNYAAAEIAR	1	6	1	A0A0J9UBY2		0	0	0.0001213	81.1	6.00815e-07	2	1261.69	0.788044	49.1002	0
GKVEILVNDQGNR	2	1	1	A0A0D2XQC1		0	0	0.002037	81.03	7.70322e-07	2	1441.77	-2.39624	28.4046	1
ATDADFGKEDPAR	2	1	1	A0A0D2XKD9		0	0	8.522e-05	81.02	9.58698e-07	2	1392.64	-0.0845055	20.8876	1
ALYNDQLSVIQR	1	1	1	A0A0D2XH49		0	0	0.0002402	81.02	8.08469e-07	2	1419.76	1.18928	47.8704	0
AVASSLETNFLK	1	2	1	A0A0D2X8I2		0	0	0.0004412	81	6.69619e-07	2	1279.69	0.63279	50.0931	0
IVNEPTAAAIAYGLDK	1	1	1	A0A0D2XQC1		0	0	2.349e-06	80.9	8.72574e-07	2	1645.88	-1.90103	50.4011	0
IIDATTVQSIER	1	1	1	A0A0D2XI04		0	0	4.98e-05	80.71	8.53851e-07	2	1345.73	-0.0951431	42.0044	0
FILDTLVNGLSR	1	1	1	A0A0D2X8I1		0	0	8.146e-05	80.71	4.36903e-07	2	1347.76	-0.748456	52.4614	0
SDFNTTGFSYR	1	4	1	A0A0C4DHU4		0	0	0.001738	80.7	7.78366e-07	2	1294.57	-1.90094	42.5475	0
QITQLLGDVDR	1	2	1	A0A0J9V2G6		0	0	0.0002533	80.64	8.4615e-07	2	1257.68	-0.0526376	50.006	0
SNAIDLLVSGQLPK	1	2	1	A0A0D2X961		0	0	1.767e-05	80.64	4.97507e-07	2	1454.82	-0.708817	51.5403	0
IGPNGLIDGFFAK	2	1	1	A0A0D2Y5A1		0	0	6.496e-05	80.62	8.18845e-07	2	1348.73	-0.483348	52.1367	0
KAVDEIVLVGGSTR	1	1	1	A0A0D2XAH7		0	0	0.0001744	80.56	5.56421e-07	2	1443.82	-0.30585	39.3685	1
YSSSLPSYIESER	1	2	1	A0A0D2Y050		0	0	6.147e-05	80.45	1.49661e-06	2	1517.71	-0.979471	45.8941	0
IVTTLTSVLK	1	2	1	A0A0D2XPN3		0	0	0.001574	80.3	5.1329e-08	2	1074.68	-1.36661	50.0592	0
LFDESGAPIASLR	1	2	1	A0A0D2XVR8		0	0	5.204e-05	80.19	1.10843e-06	2	1375.72	-1.03136	50.3438	0
VADYYVDYYNEK	1	1	1	A0A0D2Y2D2		0	0	1.297e-05	80.07	1.40074e-06	2	1541.67	-3.31931	44.1803	0
NSPAIIFIDEIDSIAPK	2	5	1	A0A0D2XZD6		0	0	2.11e-05	80.06	1.08146e-06	2	1842.98	-0.894964	53.3855	0
LNLPLFPTTTIGSFPQTK	1	1	1	A0A0D2Y8Z1		0	0	3.668e-07	80	6.455e-07	2	1975.09	-0.65853	52.331	0
KGEANSIISSYNR	1	1	1	A0A0D2XIG0		0	0	0.0008213	79.95	1.4152e-06	2	1438.73	0.0221889	29.4077	1
AVANEcAANFISVK	1	5	1	A0A0D2XZD6	C6(Carbamidomethyl)	0	0	9.061e-05	79.92	1.48663e-06	2	1493.74	-0.993028	45.0484	0
APSSScALGFAQTATK	1	2	1	A0A0D2XUU4	C6(Carbamidomethyl)	0	0	0.002601	79.87	1.74857e-06	2	1596.77	3.91078	39.9509	0
ISELLINFLGK	1	1	1	A0A0D2Y2C2		0	0	9.413e-05	79.78	2.69828e-07	2	1246.74	-3.78898	52.4098	0
AINNEQVEGFPK	1	1	1	A0A2C8CXF1		0	0	0.0002161	79.78	1.41752e-06	2	1345.67	-1.26336	36.2923	0
TVGLSELNEVYK	1	1	1	A0A0C4DHW5		0	0	0.001862	79.77	1.26895e-06	2	1351.71	-2.74369	49.9406	0
EQcEQLGHGLGSWLR	2	2	1	A0A0J9VCC4	C3(Carbamidomethyl)	0	0	6.473e-07	79.76	2.16753e-06	2	1769.84	-1.69071	50.0671	0
FEQSLNYSLER	1	1	1	A0A0D2XU70		0	0	0.0004274	79.69	1.48425e-06	2	1385.67	-0.270085	42.9534	0
DmIVVPEMIGSVIGIYSGK	1	2	1	A0A0D2X9U6	M2(Oxidation)	0	0	3.61e-05	79.61	1.56873e-06	2	2024.05	1.49926	53.3509	0
VPNLHIIDEAR	1	1	1	A0A0D2XPW5		0	0	0.0002557	79.57	9.36811e-07	3	1276.7	-0.168081	41.9079	0
LGATDDAEELKR	2	6	1	A0A0D2X9L7		0	0	6.566e-05	79.57	1.42813e-06	2	1317.66	0.120782	23.4121	1
LDLPVFVTPMGK	1	4	1	A0A0C4DHU4		0	0	3.531e-05	79.47	1.02698e-06	2	1316.73	-1.04425	52.0516	0
IIVVDVNPSK	1	3	1	A0A0D2XMM8		0	0	0.0006802	79.12	4.39637e-07	2	1083.64	0.0234758	39.689	0
APIPITIVTGFLGSGK	2	1	1	A0A0D2XV84		0	0	1.667e-06	79.08	3.33088e-07	2	1570.92	-1.12329	53.0837	0
SLNNPTTAQEVLR	1	1	1	A0A0D2XHD8		0	0	4.941e-05	78.96	1.42368e-06	2	1442.76	-0.780941	37.5884	0
YAATEIQSSK	1	1	1	A0A0D2XJZ4		0	0	0.003751	78.92	1.14576e-06	2	1097.55	0.378836	19.3879	0
ESQVTEIVDVPIENHR	2	1	1	A0A0D2XQE1		0	0	1.223e-05	78.83	2.31725e-06	3	1864.94	0.0790181	47.0849	0
LIFAGkQLEDGR	2	3	1	A0A0D2XGI2	K6(GlyGly)	0	0	0.0008648	78.77	1.36456e-06	2	1460.79	0.427291	40.3991	1
NFSLEDVHVEGTER	2	1	1	A0A0D2XIF6		0	0	4.579e-05	78.65	2.46444e-06	2	1631.76	-2.10843	45.9814	0
IGPNVTIGPDVVIGDGVR	2	2	1	A0A0J9UH90		0	0	2.737e-06	78.63	7.47816e-07	2	1777.99	2.80321	50.8883	0
SLAIHPWSTTHEQLSEDER	3	1	1	A0A0D2YG02		0	0	1.214e-07	78.6	3.48961e-06	3	2236.06	-0.445633	40.5528	0
LLVPAINVNDSVTK	1	1	1	A0A0D2XZ51		0	0	3.008e-05	78.54	5.99023e-07	2	1482.85	-0.31753	50.4341	0
VIAATSSSLLHTPHTLASEK	2	1	1	A0A0D2Y8Z1		0	0	5.046e-07	78.52	1.32731e-06	3	2063.11	-0.901077	37.9409	0
AIASTVQTSLGPYGR	1	1	1	A0A0D2XDT4		0	0	3.109e-05	78.41	1.59498e-06	2	1520.81	-0.549379	43.3758	0
LWLSAAQYSVYEALTK	1	1	1	A0A0D2Y1Z2		0	0	6.898e-07	78.4	1.79668e-06	2	1842.97	1.98129	52.5488	0
LEDYAAAIDDQTR	1	1	1	A0A0D2YG02		0	0	5.268e-05	78.36	2.07225e-06	2	1480.69	-2.00389	43.0091	0
YVGDIATWDSAEK	1	2	1	A0A0D2X8C8		0	0	6.007e-06	78.33	2.19678e-06	2	1454.68	-0.0867554	47.826	0
VIDSLQTGDK	1	1	1	A0A0D2YGI9		0	0	0.005623	78.29	1.68266e-06	2	1075.56	-4.30855	24.4617	0
SATPVDSQAALQANK	1	2	1	A0A0J9VIS4		0	0	5.432e-05	78.12	2.05509e-06	2	1500.77	0.146078	25.9607	0
ASEIALIAK	1	1	1	A0A0D2Y8Z1		0	0	0.001202	78.07	1.15719e-06	2	915.551	-0.132615	39.2534	0
FDPSYLGYAEEVVQER	1	1	1	A0A0D2XWU0		0	0	2.724e-06	78.06	3.33732e-06	2	1901.88	-5.13584	51.7938	0
LVQEFDDHEASR	2	1	1	A0A0D2XHD8		0	0	0.0001975	77.98	2.42573e-06	2	1445.67	4.0279	25.5786	0
LAQLLEGSQVPNTEQVK	2	2	1	A0A0J9ULC8		0	0	2.399e-05	77.94	1.37795e-06	2	1853.99	-2.33122	45.0266	0
IHYPLISYAPVISSAK	2	2	1	A0A0D2X9U0		0	0	6.914e-05	77.91	1.00078e-06	2	1758.98	-0.695045	50.4924	0
HAAAPAESATVQDLVR	2	2	1	A0A0D2XJP0		0	0	1.875e-05	77.9	2.22756e-06	2	1635.84	-1.25207	37.3178	0
ISDDEcILVK	1	1	1	A0A0D2XWU0	C6(Carbamidomethyl)	0	0	0.0006211	77.89	1.86613e-06	2	1191.59	-0.860166	38.1782	0
IIVDTYGGWGAHGGGAFSGK	1	2	1	A0A0D2X9R5		0	0	2.106e-05	77.8	3.36315e-06	3	1949.95	-0.749508	49.2524	0
QGYNNYDSEDGAVLR	2	1	1	A0A0D2XDT4		0	0	0.0001346	77.76	2.66735e-06	2	1700.75	-1.7797	36.3347	0
LNSSNLSAIASQQGDQK	1	1	1	A0A0D2Y0K6		0	0	0.0003958	77.76	2.93199e-06	2	1760.87	-2.3072	36.0931	0
VETVAEAVVEALGDETVK	1	2	1	A0A0D2XDW1		0	0	2.102e-05	77.73	2.389e-06	3	1858.96	-0.990156	53.0878	0
DFLLPSNVVSQADLTR	1	2	1	A0A0D2XCJ2		0	0	2.37e-05	77.68	2.00123e-06	3	1774.93	-0.255643	51.6671	0
GSLGGTcLNVGcIPSK	1	2	1	A0A0J9V5H9	C7(Carbamidomethyl); C12(Carbamidomethyl)	0	0	6.064e-06	77.65	2.82596e-06	2	1619.79	-1.01541	44.8103	0
TNESELLATIDKEGAISK	1	1	1	A0A0J9WFZ0		0	0	1.867e-05	77.56	2.53611e-06	2	1918.99	-3.87903	50.0448	1
GLTALGDVYINDAFGTAHR	1	2	1	A0A0D2Y5W3		0	0	5.042e-07	77.55	3.09482e-06	3	1991	-0.826798	51.1553	0
LTLDFETNK	1	1	1	A0A0D2XZ23		0	0	0.00207	77.52	1.65948e-06	2	1080.56	0.0807688	47.0824	0
ATNVANIEESGDK	1	2	1	A0A0D2XZ45		0	0	1.078e-05	77.41	2.33021e-06	2	1347.64	-0.914585	24.0113	0
AAGLTAYNHNVDTSR	1	1	1	A0A0D2XBB4		0	0	0.0008592	77.32	3.17417e-06	2	1589.76	-2.573	24.9341	0
ATTSDGLGPHAALLVATNEKPFQQATQYIR	2	1	1	A0A0C4DHW5		0	0	1.203e-10	77.29	2.77064e-06	3	3198.65	-2.72875	50.5025	0
LIAQVVSSITSSLR	1	2	1	A0A0D2X9U0		0	0	0.0003196	77.28	5.12567e-07	3	1473.86	-1.67123	52.3986	0
GELQccGATTLNEYR	2	1	1	A0A0D2X918	C5(Carbamidomethyl); C6(Carbamidomethyl)	0	0	0.0001812	77.11	3.33337e-06	2	1771.78	3.16475	38.7948	0
NVTVAPLVLLSAVDHYNR	1	1	1	A0A0D2Y8P6		0	0	1.042e-06	77.09	1.25957e-06	3	1981.08	-3.18812	52.2457	0
FVGQSEENIR	1	1	1	A0A0D2Y968		0	0	0.0003487	77.03	2.11528e-06	2	1178.58	-0.583752	26.9459	0
FNNGDYESSVADQQR	1	2	1	A0A0D2XQS1		0	0	0.000189	76.82	3.04988e-06	2	1729.74	-1.57152	28.9617	0
QEYDESGPSIVHR	3	2	1	A0A2C8D194		0	0	0.0001045	76.81	3.42065e-06	3	1516.7	-0.268108	26.5046	0
cAcGALDTFGDGIDTK	1	2	1	A0A0J9ULC8	C1(Carbamidomethyl); C3(Carbamidomethyl)	0	0	4.61e-06	76.79	3.06264e-06	2	1700.73	0.916714	48.1232	0
GADccVLVYDVNNAK	1	1	1	A0A0J9V4E0	C4(Carbamidomethyl); C5(Carbamidomethyl)	0	0	1.157e-05	76.78	3.78229e-06	2	1697.76	-0.134772	45.233	0
LIAQVVSSITASLR	1	1	1	A0A0D2XAP0		0	0	0.0004805	76.7	4.0942e-07	3	1457.87	-1.24556	52.6335	0
GAQGLESQGFDAK	1	1	1	A0A0D2XP34		0	0	0.0001031	76.68	2.42275e-06	2	1307.62	-1.93215	29.8892	0
LPIGDLATQFFADR	2	1	1	A0A0D2XVP6		0	0	4.475e-06	76.65	2.4309e-06	2	1563.82	3.9328	52.5389	0
NVVALAAGFVDGR	1	2	1	A0A0D2XXG3		0	0	0.0001092	76.61	2.24821e-06	2	1288.7	-0.787305	51.5453	0
VLSISGTGAATPVK	1	4	1	A0A0J9UMY7		0	0	1.514e-05	76.58	1.54839e-06	2	1300.75	-0.690281	37.1695	0
DPEAEAEDKVEEEK	3	1	1	A0A0D2Y970		0	0	0.0001777	76.54	3.37609e-06	2	1617.71	-2.19895	30.3091	1
TAIEAAcLLLR	1	2	1	A0A0D2XUN7	C7(Carbamidomethyl)	0	0	0.000442	76.48	1.92519e-06	2	1230.69	-1.67622	51.2467	0
KADVDLNKR	2	1	1	A0A0D2XDE8		0	0	0.01265	76.44	2.21993e-06	3	1058.6	-0.288993	9.58801	2
FQPIIVSEPSVEDTISILR	1	1	1	A0A0D2X918		0	0	5.903e-06	76.19	1.74557e-06	2	2143.16	-0.803441	52.3632	0
NDNLQGcQIINYR	1	2	1	A0A0D2XZ45	C7(Carbamidomethyl)	0	0	0.0001105	76.15	3.81099e-06	2	1607.76	0.716783	42.3258	0
VNQIGTLTESIQAAK	1	2	1	A0A0D2X829		0	0	1.191e-05	76.12	2.14167e-06	2	1572.86	-1.35298	49.4993	0
TFIQALVFNYNTLK	1	1	1	A0A0D2Y1Y9		0	0	2.172e-05	75.94	2.24758e-06	2	1671.91	0.248201	52.6419	0
NSDPETTLFLIASK	1	2	1	A0A0D2XU68		0	0	4.212e-05	75.89	3.40074e-06	2	1535.8	1.02177	51.6659	0
FSPNPQNPVIVSAGWDK	1	1	1	A0A0C4DHS7		0	0	8.431e-06	75.86	4.44124e-06	2	1855.93	-0.0257988	50.2164	0
AQETNDEIIDPTK	1	1	1	A0A0D2Y402		0	0	0.0002124	75.84	3.93529e-06	2	1473.71	-0.812438	30.9076	0
SADQPFIVGQR	1	3	1	A0A0D2XD29		0	0	0.006774	75.83	2.86685e-06	2	1217.63	-0.404596	37.8485	0
ETEESGQTVTIGK	1	1	1	A0A0D2X891		0	0	7.058e-05	75.83	3.44152e-06	2	1378.67	1.08719	22.1195	0
LGAVNSINFSR	1	1	1	A0A0D2XXJ9		0	0	0.0001994	75.78	2.46933e-06	2	1177.63	-1.93333	42.5286	0
VVTQEEVAEFR	1	4	1	A0A0D2XPW9		0	0	0.0001586	75.76	3.29437e-06	2	1306.66	-1.36715	39.3628	0
NNYDNDSVTFSPQGR	1	1	1	A0A0D2XVF0		0	0	0.0003339	75.76	3.9912e-06	2	1713.74	-1.84371	35.5478	0
TAETADDQSTSIANR	1	6	1	A0A0J9UP73		0	0	0.000576	75.71	4.2227e-06	2	1579.72	-1.91366	18.576	0
GSGSGGAGPDATGGDVR	1	1	1	A0A0D2X924		0	0	4.92e-05	75.7	3.31193e-06	2	1417.63	-0.53406	13.8896	0
GIQAAVEAVVEFLQK	2	2	1	A0A0D2XVI4		0	0	0.000206	75.69	1.85065e-06	2	1601.89	2.81754	54.4994	0
VLLSSLIVEGLNR	2	1	1	A0A0D2XHH7		0	0	6.17e-05	75.59	6.18369e-07	2	1412.85	-1.37938	52.3001	0
FLLPVQQAEFQLTK	1	3	1	A0A0J9URF5		0	0	3.832e-05	75.53	1.70038e-06	2	1661.93	1.32438	51.9516	0
QTFLDFFNNLGDEK	1	3	1	A0A0D2XMP0		0	0	1.219e-05	75.49	5.04947e-06	2	1687.79	-1.00607	52.8622	0
SIGSASDTAGGEDAR	1	1	1	A0A0D2Y594		0	0	0.0004093	75.45	3.19599e-06	2	1393.62	-1.93073	16.181	0
SVEMHHEQLTEGQPGDNVGFNVK	2	2	1	A0A2C8D0A4		0	0	1.221e-06	75.43	8.31328e-06	4	2552.18	0.267813	37.1285	0
ILcQLADSFIYVVSR	1	1	1	A0A0D2Y8Q2	C3(Carbamidomethyl)	0	0	1.461e-05	75.38	3.17549e-06	2	1783.94	1.24537	53.022	0
IVLVQVAVPSR	1	1	1	A0A0D2XUU9		0	0	0.0005935	75.32	2.14448e-07	2	1180.74	-1.77682	49.8618	0
AAAPcVVFLDELDSIAK	2	5	1	A0A0D2XZD6	C5(Carbamidomethyl)	0	0	6.807e-06	75.32	4.82509e-06	2	1818.92	-3.22334	53.216	0
LGFSEQcIEEAK	1	4	1	A0A0J9VRH6	C7(Carbamidomethyl)	0	0	9.211e-05	75.28	4.29752e-06	2	1410.66	-0.51586	43.2436	0
FEELcQDLFR	1	1	1	A0A0D2XA80	C5(Carbamidomethyl)	0	0	0.0005412	75.25	3.71979e-06	2	1356.62	-1.19449	50.9293	0
TLLEAIDSIEPPK	4	2	1	A0A2C8D0A4		0	0	0.0001249	75.21	1.81383e-06	2	1425.78	-1.19468	50.4441	0
EEQAVLQPVSQDYGAK	3	1	1	A0A0D2XZN4		0	0	3.132e-06	75.21	5.3737e-06	2	1761.86	-0.367569	38.0936	0
VVLIGDSGVGK	1	2	1	A0A0J9VWY5		0	0	0.0005215	75.16	2.31335e-06	2	1043.61	0.647551	37.7211	0
YAINSLLSLLDR	1	1	1	A0A0D2XAN4		0	0	4.017e-05	75.1	1.78156e-06	2	1377.77	0.116136	53.125	0
LIIIAGNTPPLR	1	2	1	A0A0J9UT99		0	0	0.001435	75.09	1.7965e-07	2	1277.79	-1.00102	50.2867	0
ILQWESDFLAHLK	1	1	1	A0A0J9WFZ0		0	0	0.0001135	75.05	3.08857e-06	2	1599.86	3.39076	51.9477	0
GYALNcTVASQAMPTR	1	1	1	A0A0D2XWU0	C6(Carbamidomethyl)	0	0	0.0006558	75.05	5.79106e-06	2	1739.83	6.62793	42.7966	0
KADANAIDLIAR	2	1	1	A0A0D2XCF2		0	0	0.0005868	74.96	2.57238e-06	2	1270.71	2.61111	40.6728	1
TGLGATGSDFEVR	1	1	1	A0A0D2XND0		0	0	6.225e-05	74.96	4.28464e-06	2	1309.64	-1.66863	40.8928	0
DISALLLQVLDEGYLTDAQGHK	2	1	1	A0A0D2X918		0	0	0.0001672	74.96	4.6389e-06	3	2399.25	0.234864	53.7829	0
HSEFISYPIYLHVEK	3	2	1	A0A0D2XK76		0	0	4.218e-07	74.87	5.07002e-06	2	1861.95	-1.54093	49.8252	0
EcTENSVVFHER	2	7	1	A0A0J9UCF2	C2(Carbamidomethyl)	0	0	4.022e-05	74.79	4.41752e-06	2	1506.67	0.733741	26.2589	0
sLHEQHSIPTDTEQEIR	1	2	1	A0A0J9VCC4	N-Term(Acetyl)	0	0	1.817e-05	74.78	7.9489e-06	2	2061.97	-4.36442	33.8558	0
VDATVIQTVGEK	1	1	1	A0A0D2YEQ7		0	0	0.0008592	74.72	3.29192e-06	2	1259.69	4.86938	36.7934	0
GQDAAGIAVcQGGR	1	1	1	A0A0D2XWR3	C10(Carbamidomethyl)	0	0	4.444e-05	74.72	4.45894e-06	2	1359.64	0.197888	25.1406	0
GQANYNAGNTYQDALAHHR	2	2	1	A0A1D6QVK6		0	0	1.556e-06	74.71	8.26907e-06	3	2100.96	0.414097	29.0483	0
YAADQPLAGAR	1	1	1	A0A0D2XZ51		0	0	0.002534	74.64	4.28073e-06	2	1132.57	-1.37356	26.9943	0
ISADLTDLDSVK	1	1	1	A0A0D2XLD0		0	0	4.264e-05	74.43	3.96276e-06	2	1276.66	-1.83063	48.0612	0
LDTPIDLSEPQNDPGNEDFVVDEILK	1	3	1	A0A0C4DHU4		0	0	3.653e-06	74.33	1.1038e-05	2	2912.4	-1.61627	52.4027	0
YAEFHTELESLENR	1	1	1	A0A0D2XIH5		0	0	0.0002543	74.32	6.82703e-06	3	1737.81	1.22016	49.2114	0
LGLYSQHSSEQLDLTK	2	1	1	A0A0D2XK80		0	0	0.0002161	74.3	6.07274e-06	2	1818.92	-0.942818	42.2078	0
SAGLIPDVIAcR	1	7	1	A0A0J9UPQ3	C11(Carbamidomethyl)	0	0	0.000321	74.22	3.99825e-06	2	1271.67	-2.43549	50.7456	0
AATEcEEDEQR	1	1	1	A0A0D2XIF7	C5(Carbamidomethyl)	0	0	0.0005069	74.19	2.68842e-06	2	1337.53	-0.602884	9.62918	0
AILANPSTYEIIDPALFGLTR	2	1	1	A0A0J9UCC3		0	0	2.414e-06	74.18	2.48455e-06	2	2275.23	0.681064	52.9264	0
ISQSDLLAEAK	2	1	1	A0A0D2Y8Z1		0	0	0.0003971	74.14	4.47348e-06	2	1174.63	-2.85362	39.824	0
TIAIIAEGVPER	1	1	1	A0A0D2XUT9		0	0	0.0001165	74.12	1.62067e-06	2	1268.72	1.18892	48.0846	0
QNQcPVIVSSSQGGmDIETVAK	1	4	1	A0A0J9VRH6	C4(Carbamidomethyl); M15(Oxidation)	0	0	7.391e-06	74.12	1.07232e-05	3	2364.11	-1.91079	41.6758	0
ISVAGITSENVGR	1	2	1	A0A0J9VPV0		0	0	1.764e-05	74.08	3.98658e-06	2	1302.7	-1.07055	42.5839	0
YKPQDATTNPSLILAASK	2	1	1	J9MJK9		0	0	4.759e-05	74.04	3.83807e-06	2	1918.02	-1.70145	43.804	0
IVmQPGVDVEASTTQK	1	1	1	A0A0J9U592	M3(Oxidation)	0	0	6.741e-05	74.01	6.55366e-06	2	1718.86	-1.23853	30.2757	0
AIGVLPQLIIDR	1	1	1	A0A0D2Y4T8		0	0	0.000655	74	3.24457e-07	2	1307.8	-1.31308	51.8973	0
TIAISTSHSSVQK	1	1	1	A0A0D2XQV2		0	0	0.0001089	73.95	4.8769e-06	2	1358.73	-0.356945	20.0704	0
SENNLDNVAITR	1	1	1	A0A0D2YCA1		0	0	0.0002327	73.93	5.44357e-06	2	1345.66	-6.52353	33.8758	0
YYVTVIDAPGHR	5	14	1	A0A2C8D0A4		0	0	0.002264	73.9	5.30409e-06	2	1390.71	-0.394238	38.7486	0
SIPEAESLSLLLEGVR	2	1	1	A0A0J9UQD6		0	0	1.357e-05	73.83	3.18159e-06	2	1712.94	-2.17446	52.6266	0
LDPEIADWFSFATEK	2	1	1	A0A0D2Y8Z1		0	0	3.274e-05	73.83	8.0378e-06	2	1768.84	-1.99466	52.9843	0
DYFPEVNGVVFLVDAK	1	1	1	A0A0D2XEG6		0	0	1.826e-05	73.81	6.12844e-06	2	1811.93	2.18074	52.6975	0
VSGVGLLALWK	1	1	1	A0A0D2Y8P1		0	0	0.0001447	73.8	1.33398e-06	2	1142.69	-1.27002	52.407	0
HDNGAVVPQR	1	2	1	A0A0D2X9R5		0	0	0.0008525	73.77	4.05907e-06	2	1092.55	-0.148654	11.9932	0
LSGEAIVTSTSAAR	1	3	1	A0A0J9WR77		0	0	0.0002801	73.77	4.50821e-06	2	1362.72	-0.225874	34.8833	0
TGGNASTLDEALR	1	2	1	A0A0J9WN41		0	0	4.726e-05	73.63	5.16745e-06	2	1304.64	-1.73074	35.7644	0
SGGGVATATITDTDIR	1	1	1	A0A0D2XJU6		0	0	0.0004029	73.6	6.58048e-06	2	1534.77	-2.08212	38.431	0
TcLLEQENDPTQLR	1	1	1	A0A0D2XEN9	C2(Carbamidomethyl)	0	0	0.0001854	73.57	8.90951e-06	2	1716.82	-2.63321	42.2335	0
IELGTPSEALQK	1	1	1	A0A0D2YBG8		0	0	0.0001702	73.56	4.58397e-06	2	1285.7	0.0991449	40.7533	0
ALLGPLLNPTLWETR	1	2	1	A0A0J9UC68		0	0	7.776e-06	73.56	1.33708e-06	2	1693.97	1.16441	52.9363	0
AGTEAEDIEEDENIK	1	4	1	A0A0D2XNM1		0	0	8.926e-05	73.55	7.29033e-06	2	1662.73	0.0777204	35.1034	0
TVYGINLQQHR	2	2	1	A0A0D2X961		0	0	0.0006089	73.51	4.84428e-06	2	1328.7	-2.96588	34.6105	0
EIAAGETDVDYAHEAIER	1	1	1	A0A0D2XVM0		0	0	5.895e-07	73.51	1.00986e-05	3	1988.92	-0.690437	40.7273	0
DLLNILAIAANDK	1	1	1	A0A0D2XXF3		0	0	6.314e-05	73.46	2.72068e-06	2	1383.79	1.63705	53.1207	0
VLLVPLSSNAQFKPLLK	1	2	1	A0A0D2XD82		0	0	1.263e-06	73.45	1.80742e-07	3	1867.14	-1.65943	51.0989	0
DFELEETEDEKK	2	2	1	A0A0D2XK76		0	0	0.0002607	73.38	6.39892e-06	2	1511.67	-1.29138	32.9372	1
GDLDAYDQLSDR	1	1	1	A0A0D2XIF7		0	0	0.0003743	73.35	4.93129e-06	2	1367.61	-0.589584	42.272	0
FTATAALGVIHR	1	2	1	A0A0D2YGM3		0	0	0.005935	73.23	3.74564e-06	3	1256.71	-3.86797	45.214	0
ATPEDLQANAEYIR	1	1	1	A0A0D2XEN9		0	0	5.036e-05	73.23	7.49841e-06	2	1590.77	-2.58691	41.5547	0
IEGESAHEITEGEIK	2	1	1	A0A0D2XUI6		0	0	0.000341	73.15	8.29387e-06	2	1641.79	-2.61623	29.928	0
LGEGGGPSLDIAR	1	1	1	A0A0D2XJP2		0	0	4.84e-05	73.07	3.88868e-06	2	1241.65	4.49323	40.8408	0
SHEDLLDAEANKGELTEEELK	1	3	1	A0A0J9UXM5		0	0	5.108e-05	73.07	1.24132e-05	3	2370.13	0.494006	44.3816	1
AVVTVSTQQLPFK	1	1	1	A0A0D2X978		0	0	0.0002419	72.93	2.82424e-06	2	1417.8	-1.47923	49.8402	0
TISLTPLSTcGTcK	1	2	1	A0A0D2XWC9	C10(Carbamidomethyl); C13(Carbamidomethyl)	0	0	0.0002027	72.93	8.24861e-06	2	1538.75	-0.906871	45.5023	0
VcQDVLDVLDDFLIPNAATGESK	2	3	1	A0A0J9U6T0	C2(Carbamidomethyl)	0	0	0.0003507	72.89	1.24707e-05	2	2519.23	-1.87277	53.9111	0
LESDTPIVLAELDK	1	1	1	A0A0D2XJH0		0	0	8.285e-06	72.84	5.36116e-06	2	1542.82	-1.26064	51.2139	0
VLcGSPGYINLLDSLNAWPLVK	1	2	1	A0A0D2X961	C3(Carbamidomethyl)	0	0	3.792e-06	72.81	4.97944e-06	2	2429.29	1.51045	53.5494	0
QLISSAADGVSSPGK	1	1	1	A0A0D2XVL9		0	0	0.0002243	72.79	6.79614e-06	2	1416.73	1.0244	31.97	0
LQEAPDQVPVGELPR	1	2	1	A0A0J9UEK6		0	0	0.0005014	72.76	6.64992e-06	2	1647.86	-3.17716	45.1841	0
EFADSLGIPFLETSAK	1	1	1	A0A0D2Y939		0	0	3.774e-06	72.69	8.35933e-06	2	1724.87	-1.79141	52.4298	0
ENLSVDNcVIVSPDAGGAK	1	1	1	A0A0D2XPQ1	C8(Carbamidomethyl)	0	0	0.0001888	72.65	1.14789e-05	2	1944.93	-3.68256	44.5626	0
GAEVVTIGLGPGK	1	1	1	A0A0D2Y9E9		0	0	9.053e-05	72.59	2.88072e-06	2	1197.68	-1.28809	43.8528	0
MQGFQHLTVPSLAQQIFDNK	1	2	1	A0A0C4DHQ2		0	0	1.339e-06	72.55	1.0048e-05	3	2302.17	1.16212	51.7769	0
AFADALEVIPTTLAENAGLNSIK	1	1	1	A0A0D2X9D6		0	0	3.225e-06	72.45	5.72835e-06	2	2358.26	0.178748	53.0042	0
MSIcILGDQHDIDR	1	1	1	A0A0J9WHK7	C4(Carbamidomethyl)	0	0	1.294e-05	72.44	1.02059e-05	3	1672.77	-2.92073	49.3197	0
GSITAGSVATNSENLSVK	1	2	1	A0A0D2XNM4		0	0	0.000496	72.42	8.83251e-06	2	1734.88	-1.4908	37.8592	0
ALQSVGQIIGEVLK	1	1	1	A0A0D2X8I2		0	0	2.329e-05	72.31	1.86528e-06	2	1454.86	-0.717767	52.6989	0
AEAASTIKPLGLDASK	3	1	1	A0A0D2XQG2		0	0	0.0003491	72.31	4.8086e-06	2	1571.86	-0.039507	35.4394	0
gSIGQGSSQLPVR	1	1	1	A0A0D2Y2D2	N-Term(Acetyl)	0	0	0.005804	72.3	5.40853e-06	2	1327.69	-1.88219	41.2164	0
NAYLGGMEAEDGIGINTPAK	1	1	1	A0A0D2Y5A1		0	0	0.0002177	72.3	1.33226e-05	2	2020.96	-1.75966	49.7966	0
FVGSIDAASK	1	1	1	A0A0D2XPR8		0	0	0.001983	72.27	4.5003e-06	2	994.523	2.26274	28.391	0
YAATQQTGESR	1	1	1	A0A0D2XAF4		0	0	0.0009065	72.22	7.89325e-06	2	1211.56	-1.13324	11.0889	0
IASEILNSPTLYK	1	2	1	A0A0J9VPV0		0	0	5.117e-05	72.22	4.36648e-06	2	1448.8	-1.0699	49.5018	0
ALDIAAADNTPGGEISEVR	1	1	1	A0A0D2XI05		0	0	0.0005224	72.21	1.06618e-05	2	1898.94	-0.856289	48.7977	0
HFVALSTNEEEVTK	2	2	1	A0A0D2XU68		0	0	2.492e-05	72.15	9.49658e-06	2	1603.8	-0.595846	33.3175	0
VELLETPALTNTPPK	1	1	1	A0A0D2XC69		0	0	2.77e-05	72.13	3.20872e-06	2	1622.9	-2.91456	50.1171	0
AIVPSGASTGQHEAcELR	2	1	1	A0A0D2X829	C15(Carbamidomethyl)	0	0	0.002696	72.06	1.29905e-05	2	1882.9	-1.57449	30.0938	0
AAEQTPLSILLLGQAFK	1	2	1	A0A0D2Y589		0	0	1.345e-05	72.05	2.55108e-06	2	1800.02	-3.18312	53.2509	0
SNYNFEKPFLWLAR	1	1	1	A0A0D2X8T7		0	0	6.543e-05	71.93	9.53479e-06	3	1784.91	-1.55666	51.6367	0
sSSEQTFIAIKPDGVQR	2	1	1	A0A0D2XUM4	N-Term(Acetyl)	0	0	1.201e-05	71.89	1.01278e-05	2	1904.97	-2.34746	48.7541	0
AVADALEVIPR	1	2	1	A0A0D2XUN7		0	0	0.0006455	71.85	2.33821e-06	2	1153.66	0.333966	50.3074	0
VLSSTDIDVR	1	1	1	A0A0D2Y1W8		0	0	0.0009523	71.84	7.13881e-06	2	1104.58	-5.46596	34.4043	0
VLSPPEEQLEPETR	2	2	1	A0A0J9ULC8		0	0	0.0002458	71.83	9.78969e-06	2	1623.82	-1.70681	39.8254	0
QcQALILAPTR	2	1	1	A0A0D2XDK5	C2(Carbamidomethyl)	0	0	0.0009625	71.79	5.4666e-06	2	1270.69	-1.17183	41.1849	0
GYDSAGLAIDGDK	1	1	1	A0A0D2X8I1		0	0	0.0002844	71.71	7.67276e-06	2	1281.59	-2.32544	35.5763	0
VHTVVVSAQHSPDISTEELRK	2	2	1	A0A0D2X9R5		0	0	1.74e-06	71.62	8.25694e-06	4	2332.23	0.77025	30.777	1
FVNNPVQLQQYDK	1	4	1	A0A0J9VJ52		0	0	0.0003396	71.61	1.02294e-05	2	1592.81	0.0948416	43.6684	0
VQEIEsDEEEAPK	1	1	1	A0A0J9U5B2	S6(Phospho)	0	0	0.002835	71.58	7.61399e-06	2	1582.65	-0.730291	26.8212	0
FGGALDGAAEEFTR	2	1	1	A0A0D2XUT9		0	0	9.065e-06	71.47	1.02259e-05	2	1440.67	-1.36172	50.1898	0
DVITEEVSEDGEKR	2	1	1	A0A0D2XEN9		0	0	0.000464	71.43	1.19536e-05	2	1605.75	-4.26948	33.6428	1
VVEPWIAYGYPNLK	1	1	1	A0A0D2Y2S2		0	0	1.077e-05	71.42	7.87089e-06	2	1648.87	0.103983	51.5338	0
ILDPGLAILVPFIDR	1	1	1	A0A0D2XPQ6		0	0	0.0001827	71.41	1.05886e-06	2	1651.97	-4.09702	53.9543	0
aATAQDHLEFGGK	1	1	1	A0A0D2YGK4	N-Term(Acetyl)	0	0	2.425e-05	71.34	1.01143e-05	2	1386.66	-1.08795	39.1348	0
QYELVGDKDNSPVAR	1	1	1	A0A0J9UC03		0	0	0.0002088	71.32	1.14043e-05	2	1690.84	0.339588	30.7267	1
QTQIQNNVEATK	1	1	1	A0A0D2YG98		0	0	0.000427	71.29	9.51436e-06	2	1373.7	-3.22046	19.3208	0
VGYNPkAVAFVPISGFNGDNMLTPSTNcPWYK	1	2	1	A0A2C8D0A4	K6(Acetyl); C28(Carbamidomethyl)	0	0	0.0001788	71.22	2.16636e-05	3	3586.75	10.9119	51.7243	1
LNTALSNLEVVNK	1	2	1	A0A0J9UCM8		0	0	0.0001751	71.21	6.37253e-06	2	1414.79	1.21173	48.3233	0
tSAASESVATILcSSK	1	2	1	A0A0J9V792	N-Term(Acetyl); C13(Carbamidomethyl)	0	0	7.752e-06	71.2	1.38137e-05	2	1653.8	-0.642464	51.6698	0
RPDDEETFDNFDSSPSVPR	1	1	1	A0A0D2XGE7		0	0	0.0001282	71.17	1.86185e-05	3	2209.95	-5.02621	43.1512	0
LFLLSSHEESGIAR	2	2	1	A0A1D6QVK6		0	0	0.0001072	71.15	8.89372e-06	2	1558.82	-0.245196	48.0529	0
LSEYcSSQDIDR	1	1	1	A0A0D2Y2U1	C5(Carbamidomethyl)	0	0	3.267e-05	71.12	9.06354e-06	2	1472.63	0.914838	26.7805	0
SLNAYQQVIAR	1	2	1	A0A0D2X8I1		0	0	0.0005423	71.1	6.41956e-06	2	1262.68	-0.365347	41.8005	0
EAESWLEQLTQNAVNIAK	1	3	1	A0A0J9VBI1		0	0	6.007e-07	71.08	1.35924e-05	2	2044.04	1.64389	53.1235	0
ASLADTSADAAR	1	2	1	A0A0D2XQH9		0	0	0.0001984	71.06	8.31219e-06	2	1148.55	-0.233879	20.9606	0
AVSSDGTATTEYK	1	1	1	A0A0D2XNF4		0	0	7.249e-05	70.98	9.39639e-06	2	1329.61	-1.95988	17.0842	0
EKLEEEQALPETR	1	6	1	A0A0J9VPI9		0	0	0.004226	70.92	1.25369e-05	2	1571.79	0.443071	27.9201	1
AINEAYAAGLIGK	1	2	1	A0A0J9UVR1		0	0	0.0001054	70.83	6.76112e-06	2	1290.71	2.3307	49.2413	0
KLVAYGEEYLTK	2	1	1	A0A0D2XJH0		0	0	3.172e-05	70.8	7.03256e-06	2	1413.77	2.71024	40.4374	1
SVPAPQGDLIGGDPVPVR	1	1	1	A0A0D2XQF0		0	0	4.65e-05	70.78	7.80453e-06	2	1773.95	2.90658	49.3894	0
ATQQSENQPYDVVR	1	1	1	A0A0D2XNN3		0	0	0.0007244	70.77	1.44976e-05	2	1634.77	-1.66615	29.9377	0
KGDLPISTGSASLDDSTK	1	4	1	A0A0D2XJR4		0	0	0.0007138	70.73	1.4543e-05	2	1791.89	-1.7081	35.5233	1
VSEEGESEESTETAQGR	1	2	1	A0A0J9WLM2		0	0	0.001366	70.71	1.40454e-05	2	1824.77	0.761936	16.1619	0
LDSLIYVPLPDEPGR	1	5	1	A0A0D2XZD6		0	0	0.0004546	70.67	9.19602e-06	2	1683.89	-0.713069	51.7848	0
AMGIHAIAIDGGEEK	2	1	1	A0A0C4DHW5		0	0	0.0001549	70.61	1.2361e-05	2	1511.75	-1.68536	39.56	0
YFQQTGSTASGLR	1	1	1	A0A0D2XC49		0	0	0.0005545	70.49	1.23231e-05	2	1415.69	1.23723	29.8306	0
VTVLGAAGGIGQPLSLLLK	1	1	1	A0A0D2Y2C5		0	0	4.862e-06	70.46	3.46307e-07	2	1807.1	-1.00168	52.8223	0
TSFFQALGVPTK	1	1	1	A0A0D2XDL8		0	0	0.0009602	70.45	6.46427e-06	2	1295.7	1.34921	51.5164	0
APVILQFSQGGAAYFAGK	1	2	1	A0A0D2Y1Y2		0	0	0.0002463	70.44	9.78201e-06	2	1824.96	0.0788168	51.4168	0
IGQGASGSVYVAK	1	2	1	A0A0D2XD83		0	0	0.002756	70.4	9.43931e-06	2	1236.66	-0.0651564	25.2019	0
QFISQGQYESR	1	1	1	A0A0D2XAN8		0	0	9.527e-05	70.39	1.15955e-05	2	1342.64	-0.305449	29.9578	0
TESDAFGEIQVPADR	1	1	1	A0A0D2XGP1		0	0	0.00044	70.37	1.57632e-05	2	1634.76	-1.98349	48.1958	0
FGFDDNAEFR	1	4	1	A0A0J9VRH6		0	0	0.002783	70.33	8.03561e-06	2	1217.52	-3.49019	49.9418	0
RDDLIILSNGEK	1	1	1	A0A0D2YG01		0	0	0.0003679	70.33	1.04315e-05	2	1372.74	-1.10476	40.3709	1
VVETAYESESSTNK	1	2	1	A0A0D2XZ14		0	0	0.002116	70.33	1.42083e-05	2	1543.71	-2.17748	20.6845	0
KLVIVGDGAcGK	1	1	1	A0A0C4DHX5	C10(Carbamidomethyl)	0	0	1.872e-05	70.28	9.01935e-06	2	1216.67	-0.679883	26.545	1
VLTTLFYEPSTR	1	1	1	A0A0D2XQV2		0	0	0.001526	70.27	9.1717e-06	2	1426.76	-1.42874	50.8442	0
LGVEAATVAFR	1	1	1	A0A0J9UQD6		0	0	0.0007856	70.25	6.59427e-06	2	1133.63	-1.72823	48.185	0
FILTDEAGAPK	1	1	1	A0A0D2XWJ0		0	0	0.0003909	70.25	9.92208e-06	2	1161.62	0.0676674	42.1259	0
AGFAGDDAPR	2	3	1	A0A2C8D194		0	0	0.0003218	70.24	6.11742e-06	2	976.448	0.0620172	21.6969	0
SLTSDEPDTAR	1	3	1	A0A0D2XC02		0	0	0.001208	70.08	9.38551e-06	2	1191.55	0.541123	20.5378	0
QGLDAEATVER	1	1	1	A0A0D2XHE4		0	0	0.0005526	70.05	1.09977e-05	2	1188.59	-0.268069	28.2591	0
MAALDFVEALVK	1	1	1	A0A2C8CXF1		0	0	0.0006497	70.03	9.38991e-06	2	1306.7	-4.15187	53.2828	0
AmGIHAIAIDGGEEK	3	1	1	A0A0C4DHW5	M2(Oxidation)	0	0	0.0002107	70.02	1.59016e-05	2	1527.75	-0.896152	31.9087	0
ASHGGSSAGSAESETGTVQR	1	1	1	A0A0D2XE49		0	0	1.357e-05	70.01	2.12161e-05	3	1875.84	0.383141	11.958	0
VIDYTSTLSGR	1	2	1	A0A0D2Y5Q8		0	0	0.0001563	69.98	9.50869e-06	2	1211.63	-0.240113	39.2521	0
INNIDFYDR	1	1	1	A0A0D2XUH4		0	0	0.003899	69.97	1.13129e-05	2	1169.56	-0.174503	42.9791	0
YFEEISQDTGK	1	5	1	A0A0D2XDB5		0	0	8.647e-05	69.95	1.3545e-05	2	1316.6	0.726665	35.9001	0
ALAEFLFDDAK	1	1	1	A0A0D2XZI9		0	0	0.0009047	69.94	1.1878e-05	2	1239.62	-0.782424	51.6986	0
SEVEPAIQQNEAQQNLLK	1	1	1	A0A0D2XPW5		0	0	1.501e-05	69.93	1.67275e-05	2	2039.04	0.774131	42.4271	0
AGNFSYTDLDGSVASK	1	1	1	A0A0J9WGD0		0	0	2.879e-05	69.91	1.75857e-05	2	1631.75	-3.37437	45.2396	0
GGLPNLIPGLLEENFDR	1	1	1	A0A0D2Y973		0	0	2.345e-06	69.86	1.14688e-05	2	1853.98	0.166371	52.8565	0
ADTAEAIDFFR	3	1	1	A0A0C4DHW5		0	0	0.0002866	69.82	1.19345e-05	2	1255.59	-1.38243	51.4085	0
GLGLVQFIGELYK	1	2	1	A0A0D2XZP5		0	0	0.0001845	69.79	4.90136e-06	2	1436.81	-4.56996	53.2911	0
DGVVPGSDGAGTVLAVGK	1	2	1	A0A0J9UEN2		0	0	6.356e-05	69.74	1.21511e-05	2	1598.84	-0.370942	47.5843	0
KSQDPDQGFSTFFSETGQGK	1	1	1	A0A0D2XAP0		0	0	4.302e-05	69.73	2.78646e-05	3	2190.99	-2.27548	50.1573	1
TLTEDEIDDR	1	3	1	A0A0J9UUP8		0	0	0.001118	69.65	1.08501e-05	2	1206.54	-3.34021	28.773	0
TGVFYGGTPIK	1	4	1	A0A0D2XGU4		0	0	0.0001542	69.64	6.98028e-06	2	1139.61	-0.0321434	42.0056	0
ALEDAGVIVER	1	1	1	A0A0D2XK89		0	0	0.001097	69.61	1.07427e-05	2	1171.63	-0.450752	39.0757	0
AASAQEAIDR	1	1	1	A0A0D2XI67		0	0	0.0006519	69.6	1.1206e-05	2	1031.51	-0.617902	16.7164	0
INAIQAATEAScLILGVDETIR	2	1	1	A0A0D2XVP6	C12(Carbamidomethyl)	0	0	0.0008713	69.58	1.48598e-05	2	2358.23	-0.728617	54.011	0
SSAQDADAEVR	1	1	1	A0A0D2XUH4		0	0	0.0006147	69.57	1.0969e-05	2	1148.52	-0.328812	13.8653	0
TTPSFVGFTDTER	1	1	1	A0A0D2XA80		0	0	0.0004976	69.57	1.66826e-05	2	1457.69	-0.948519	49.5614	0
LLAFFEMLASGK	1	1	1	A0A0D2YG01		0	0	0.0001441	69.5	8.85834e-06	2	1326.71	-0.649507	53.4227	0
IVPPILAGLADDVESIR	1	4	1	A0A0D2XNM1		0	0	9.47e-05	69.42	4.99438e-06	2	1778	-4.81961	53.5551	0
IPEEcDLESISPILcAGITVYK	1	2	1	A0A0C4DHW5	C5(Carbamidomethyl); C15(Carbamidomethyl)	0	0	6.853e-05	69.4	2.61377e-05	2	2507.24	-0.830463	52.2841	0
TNESELLATIDK	1	1	1	A0A0J9WFZ0		0	0	0.001147	69.33	1.41067e-05	2	1333.68	-2.00868	49.9393	0
DGLDPIDQYFAMGR	1	1	1	A0A0D2Y8Z1		0	0	0.0001817	69.32	1.91564e-05	2	1597.73	-2.43632	52.271	0
YSFDTEASVNK	1	1	1	J9MJK9		0	0	0.0003952	69.27	1.34334e-05	2	1260.57	-2.55343	33.7881	0
STAGDTHLGGEDFDNR	3	1	1	A0A0D2XA80		0	0	0.0001836	69.26	1.7994e-05	2	1691.72	-1.53172	27.4424	0
TFDGDAISSEEAQR	1	1	1	A0A0D2XCQ6		0	0	4.947e-05	69.25	1.66212e-05	2	1525.67	-1.77336	32.8719	0
EGGGVDVESDR	1	1	1	A0A0D2XIH5		0	0	6.769e-05	69.24	1.05782e-05	2	1119.49	-1.27338	17.3776	0
VPSEQEIKDR	2	1	1	A0A0D2Y8Z1		0	0	0.002202	69.21	1.33504e-05	2	1200.62	-1.18297	17.3941	1
AGPFGQLFRPDNFVFGQSGAGNNWAK	1	3	1	A0A0C4DHT3		0	0	1.413e-08	69.2	3.42345e-05	3	2782.34	-1.46809	51.9162	0
VGGEDDDTIcR	1	1	1	A0A0D2Y2I6	C10(Carbamidomethyl)	0	0	0.000238	69.18	9.01633e-06	2	1236.52	-0.209104	19.8104	0
VGDLEVDVAK	1	1	1	A0A0D2XV84		0	0	0.0003139	69.17	1.28747e-05	2	1044.56	0.765584	35.7306	0
VGEQFTAMFR	1	2	1	A0A0C4DHT3		0	0	0.001296	69.09	1.2331e-05	2	1185.57	-1.8366	50.8671	0
FKFPENSVSLYAAK	1	1	1	A0A0D2XZN4		0	0	6.817e-05	69.09	1.6018e-05	2	1600.84	-0.806043	49.5627	1
APASSSGLSANDNIQR	1	1	1	A0A0D2XUT9		0	0	0.0003446	69.07	2.08613e-05	2	1587.76	-5.19453	24.3624	0
VVGVLLGQNDGNDVR	1	1	1	A0A0D2Y8P6		0	0	0.0001421	69.06	1.22924e-05	2	1554.82	-0.626397	43.4697	0
TEEGPALIATAILSTTAQAK	2	2	1	A0A0D2YGM3		0	0	2.498e-05	69.05	1.02672e-05	3	1986.07	-0.577704	52.8636	0
VGDHGTTFGGNPLAcR	2	1	1	A0A0D2Y4D0	C15(Carbamidomethyl)	0	0	0.0002297	69.02	2.11969e-05	2	1658.76	-6.0417	35.8774	0
AALGTQISGLAPILGK	1	2	1	A0A0J9WPA8		0	0	2.453e-05	69.01	2.20433e-06	2	1509.9	-0.835858	51.3187	0
NLNHGSFGTYPQAVR	1	1	1	A0A0D2Y2D2		0	0	2.278e-05	69.01	2.19428e-05	2	1660.82	-1.21452	33.9947	0
GMLTGPVTcLR	1	1	1	A0A0D2Y8Z1	C9(Carbamidomethyl)	0	0	0.0009559	69	1.41126e-05	2	1204.62	-0.119532	47.5515	0
DFGTTLEFVSDR	1	5	1	A0A0D2XDB5		0	0	0.000264	69	1.74235e-05	2	1386.65	-1.61289	51.3558	0
NLFDVDEAISR	1	1	1	A0A0D2XMW0		0	0	0.001451	68.97	1.57062e-05	2	1278.63	-0.689725	50.9063	0
ILSASHQLTR	2	2	1	A0A0J9UDK2		0	0	0.001572	68.95	4.5273e-06	2	1125.64	0.196876	20.726	0
VGQIFVTTTGcR	1	1	1	A0A0D2XZ51	C11(Carbamidomethyl)	0	0	0.0001738	68.9	1.57231e-05	2	1338.69	3.38434	39.4263	0
TNFYAESGGQVADTGR	1	3	1	A0A0J9WGK7		0	0	0.0009558	68.9	2.08439e-05	2	1672.75	-5.3692	33.8895	0
SIGDIQVYPDK	1	1	1	A0A0D2XQM8		0	0	0.0006682	68.88	1.46244e-05	2	1234.63	-0.82827	42.6098	0
KYDAFVASEALIK	1	2	2	A0A0D2XDB8;A0A0J9WHK7		0	0	0.0002139	68.83	1.04735e-05	2	1454.79	-1.61715	49.7178	1
GITISTAHIEYATDNR	2	1	1	A0A0D2XCJ5		0	0	0.001164	68.82	2.29373e-05	2	1761.87	-3.82585	41.215	0
FITSAGGPIPQSVGDLIHPR	1	1	1	A0A0D2YG01		0	0	2.435e-06	68.81	1.30799e-05	3	2062.1	-3.18398	50.8721	0
TScGSPNYAAPEVIGGK	1	3	1	A0A0J9UTH8	C3(Carbamidomethyl)	0	0	0.003924	68.79	2.30764e-05	2	1707.8	-3.01879	36.3361	0
ALSDPSQLDSGK	3	1	1	A0A0D2XK76		0	0	0.0002045	68.75	1.46487e-05	2	1217.6	-1.40654	27.494	0
EENNQLQTR	1	1	1	A0A0D2XUH4		0	0	0.008951	68.7	1.38066e-05	2	1131.54	1.23681	12.2265	0
ATGFNDQcDAFYDR	1	2	1	A0A0D2XMV6	C8(Carbamidomethyl)	0	0	0.000135	68.51	1.4565e-05	2	1679.67	-3.88909	42.4866	0
VLADGTYATETALTSQSSAAAK	1	1	1	A0A0D2Y1W8		0	0	9.739e-05	68.5	2.65769e-05	3	2156.08	1.77889	42.9985	0
LPESLAASPNK	1	1	1	A0A0D2XEN9		0	0	0.0001277	68.47	9.0389e-06	2	1126.61	0.177463	28.4152	0
IQADDKEPVEPESSNFDDNDEIEK	1	1	1	A0A0D2XWL5		0	0	8.114e-06	68.44	4.56152e-05	3	2763.21	-0.474086	36.393	1
AVSVPELTQQMFDPK	1	2	1	A0A0C4DHT3		0	0	0.002361	68.42	2.47473e-05	3	1689.84	-4.73309	51.4908	0
VIAQGQSWAK	1	3	1	A0A0D2XD29		0	0	0.0112	68.41	1.85312e-05	2	1087.59	-0.557668	27.1963	0
IDNYGGPELGELIK	1	2	1	A0A0D2XD82		0	0	3.437e-05	68.33	1.90814e-05	2	1517.78	-0.131687	50.9038	0
VEYVEDVDKR	2	1	1	A0A0D2XDN9		0	0	0.007134	68.3	1.98496e-05	2	1251.62	1.185	25.1794	1
YYEQQIILAK	1	1	1	A0A0D2XQ76		0	0	0.001666	68.29	9.01371e-06	2	1268.69	0.756232	43.3038	0
GGQYEEEELVQEVK	1	3	1	A0A0J9URI2		0	0	8.637e-05	68.23	2.57413e-05	2	1636.77	-1.2386	45.4457	0
SPAALGLTNIAPSADGK	2	1	1	A0A0D2XUT8		0	0	0.001204	68.16	1.32287e-05	3	1582.84	0.848169	47.848	0
YDSSASSTYK	1	1	1	A0A0D2Y8U6		0	0	0.0004249	68.15	9.39322e-06	2	1108.48	0.417353	14.2159	0
SAEFLLGLLK	1	1	1	A0A0D2XJZ4		0	0	0.00125	68.14	3.13062e-06	2	1090.65	-1.16411	52.6004	0
FNGVGDQVEGGR	1	1	1	A0A0D2XV70		0	0	0.0003828	68.12	1.64345e-05	2	1234.58	2.02859	27.0405	0
ELAmQTSQVcK	1	1	1	A0A0D2Y8V4	M4(Oxidation); C10(Carbamidomethyl)	0	0	0.0003989	68.12	1.87085e-05	2	1310.61	-1.67847	17.206	0
ASNLTEWVSQPSVQR	1	1	1	A0A0D2Y2U1		0	0	0.0009139	68.08	2.56268e-05	2	1701.86	-0.086389	49.2496	0
TYAAASTIEELQQALDGAPTK	1	2	1	A0A1D6QVK6		0	0	1.804e-05	68.08	2.95633e-05	3	2178.09	-0.307259	52.1234	0
DFEENGSLER	1	1	1	A0A0D2XAN8		0	0	0.003055	68.07	1.15797e-05	2	1195.52	-1.32796	29.9175	0
VVSQLLTLMDGMK	1	5	1	A0A0D2XZD6		0	0	0.000398	68.07	1.53538e-05	2	1434.77	0.175421	52.3014	0
YIHSQELLEIPEGVK	2	1	1	A0A0J9U592		0	0	8.72e-08	68.07	1.70459e-05	2	1754.93	-1.58312	49.7857	0
YVYAHFPINVNVSK	2	1	1	A0A0J9U592		0	0	3.711e-07	68.06	2.04772e-05	2	1650.86	-1.15408	49.7661	0
QGTGATAGGQDWK	1	2	1	A0A1D6QVK6		0	0	0.0002309	67.95	1.99684e-05	2	1276.59	-0.19038	20.2112	0
QAELEAESQK	1	1	1	A0A0D2XI50		0	0	0.001302	67.94	1.65274e-05	2	1132.55	-0.618447	15.1839	0
LAAQLAEEDASLR	1	1	1	A0A0D2XI04		0	0	1.209e-05	67.87	2.03642e-05	2	1386.72	0.210964	40.7923	0
TFTPEEISAMILTK	1	1	1	A0A0D2XA80		0	0	0.0002068	67.81	2.09455e-05	2	1580.82	-1.67164	52.3051	0
LSPGGGATEmAVSVR	1	2	1	A0A0D2XUN7	M10(Oxidation)	0	0	2.064e-05	67.8	2.27778e-05	2	1447.73	3.42154	29.1487	0
TAISLIDTLSNELPPR	2	2	1	A0A0J9ULC8		0	0	0.0001077	67.78	1.0537e-05	2	1739.96	2.05394	52.1858	0
FSDENDQQR	1	2	1	A0A0D2XXP3		0	0	0.002452	67.77	1.04861e-05	2	1138.48	6.86083	11.5338	0
STLINTIFASHLIDSK	1	2	1	A0A0J9WMF7		0	0	3.483e-05	67.77	1.45886e-05	2	1759.96	-1.8212	51.6381	0
VVDALGNPIDGK	2	2	1	A0A0J9WFZ0		0	0	9.374e-05	67.73	1.15445e-05	2	1197.64	-2.29649	36.8661	0
VDGAGDAPATGR	1	2	1	A0A0D2XWC9		0	0	3.328e-05	67.71	1.56218e-05	2	1086.52	-0.334884	12.6105	0
LAPAAVDAQNADDDER	1	2	1	A0A0D2Y4P0		0	0	0.0001241	67.71	2.9473e-05	2	1670.76	-0.19821	26.3731	0
TAVGLDTILNQK	2	2	1	A0A0J9WFZ0		0	0	0.0009105	67.7	1.43671e-05	2	1272.72	-0.370601	50.3698	0
WDSSLDESGVQAAR	1	2	1	A0A0J9U6P6		0	0	0.0003102	67.7	2.47859e-05	2	1520.69	-2.6305	37.7738	0
LVDDPNIVAPFLPK	1	1	1	A0A2C8CXF1		0	0	0.0001966	67.7	8.64406e-06	2	1537.86	-1.63107	51.9188	0
HIGGETDVPAGDIGVGGR	1	3	1	A0A0J9UEA1		0	0	0.009109	67.67	2.95576e-05	2	1706.83	-7.43241	33.8291	0
LVAPFGILESAR	1	1	1	A0A0D2XVM0		0	0	0.002223	67.64	1.05723e-05	2	1272.73	-0.954879	51.9644	0
AGLSLTSMDDQGVR	1	6	1	A0A0J9UPQ3		0	0	0.001433	67.63	2.411e-05	2	1449.7	-3.40844	46.3956	0
EGEVLSWK	1	2	1	A0A0D2XUM4		0	0	0.003489	67.56	1.73546e-05	2	947.483	0.13165	41.8057	0
ALSDGDTIR	1	2	1	A0A1D6QVK6		0	0	0.002945	67.55	1.85197e-05	2	947.48	0.50938	21.8641	0
VLIATDLLAR	1	1	1	A0A0D2XDK5		0	0	0.005893	67.51	4.39999e-06	2	1084.67	-1.01135	51.0384	0
KDIESWPFK	2	1	1	A0A0D2XAH7		0	0	0.003421	67.47	1.99026e-05	2	1149.59	0.830668	46.2624	1
IFSIDDLQTAAEK	1	4	1	A0A0J9VRH6		0	0	0.000452	67.47	2.56325e-05	2	1450.74	-3.44442	50.7761	0
IEITAHNELSGR	2	1	1	A0A0D2XMZ6		0	0	0.0001948	67.46	1.70141e-05	2	1339.7	2.14759	29.7657	0
APAIIFIDELDAVGTK	1	1	1	A0A0D2Y1V9		0	0	4.492e-06	67.45	1.45619e-05	2	1672.91	-0.738227	52.5047	0
VYDEDETKPSK	2	1	1	A0A0D2Y4A3		0	0	6.078e-05	67.39	2.46591e-05	2	1310.61	1.97904	11.5796	0
ILGNTLGVGAcK	1	2	1	A0A0J9WG57	C11(Carbamidomethyl)	0	0	0.0001952	67.36	1.84664e-05	2	1202.66	-0.455702	38.5128	0
SVNYVNVVVSDK	1	1	1	A0A0D2XVR8		0	0	0.0001251	67.29	2.16127e-05	2	1322.7	0.657105	44.3773	0
LSVWTETDKGPDVTK	2	3	1	A0A0J9UXM5		0	0	9.211e-05	67.25	2.86786e-05	3	1675.85	-1.25463	39.6297	1
IQDSQDELQVR	1	1	1	A0A0D2XC36		0	0	0.0006958	67.22	2.62504e-05	2	1330.66	-0.882544	28.9444	0
AVGNSDIFEGTDR	1	1	1	A0A0D2Y7J6		0	0	5.771e-05	67.2	2.43137e-05	2	1380.64	-1.2274	37.8523	0
IVEVQGTPEGIQR	1	1	1	A0A0D2XD59		0	0	0.001355	67.2	1.40623e-05	2	1425.77	-0.849425	33.2419	0
IPTPVIAPLIEK	1	1	1	A0A0D2XUH4		0	0	0.0003274	67.18	1.31127e-06	2	1290.8	-1.75889	51.1016	0
SGDELTSLSDYVTR	1	2	1	A0A0D2XK76		0	0	0.0001138	67.18	3.02835e-05	2	1542.73	-2.01983	50.5571	0
LDPSSGLISQHPR	1	2	1	A0A0D2XQH9		0	0	7.868e-05	67.15	2.22051e-05	3	1406.74	-0.932246	32.3329	0
GcVTSWEEGLER	1	1	1	A0A0D2XEN9	C2(Carbamidomethyl)	0	0	0.0003633	67.14	2.43235e-05	2	1422.63	-1.71033	47.6171	0
FGEVINNPEIK	1	4	1	A0A0D2XNM1		0	0	0.0009847	67.1	2.1341e-05	2	1259.66	0.130437	41.0738	0
TNEEDGYQTGK	1	2	1	A0A0D2XD29		0	0	0.001118	67.08	1.56316e-05	2	1241.53	-0.662105	12.4328	0
NPANFNVDNIR	1	1	1	A0A0D2XDT4		0	0	0.0009976	67.02	2.5849e-05	2	1273.63	-0.164784	40.8042	0
FVQGEVNNVDFSGR	1	2	1	A0A0D2Y302		0	0	1.463e-05	66.99	3.37677e-05	2	1567.75	-0.216815	40.3749	0
NIHPVVIISAFK	1	1	1	A0A0D2XUN7		0	0	0.00222	66.98	3.72832e-06	3	1337.79	-0.799014	50.3539	0
YTGEVLTVDEK	1	1	1	A0A0D2XCC1		0	0	0.000188	66.85	2.59205e-05	2	1253.62	-1.1662	34.8537	0
AGHQTSAESWGTGR	1	1	1	A0A0D2XCJ2		0	0	0.0004269	66.84	2.91476e-05	2	1444.65	-1.19794	18.473	0
SSSPLADQSSLSK	1	1	1	A0A0D2YBZ4		0	0	0.0001977	66.82	2.40933e-05	2	1306.65	-0.144087	26.8846	0
ITTPINWVPGEDVIVHPSVK	1	1	1	A0A0D2YGI9		0	0	1.225e-06	66.8	1.54712e-05	3	2201.2	-0.616355	50.9026	0
DAESGTEEFHK	1	2	1	A0A0J9WKP4		0	0	0.0007225	66.78	2.00973e-05	2	1249.53	-0.329324	16.8895	0
GIVTVADDIYAK	1	1	1	A0A0D2XEN9		0	0	0.0005273	66.78	1.83342e-05	2	1264.68	0.57204	49.4715	0
VAAEAAEAAQENEVK	1	1	1	A0A0D2XZP2		0	0	4.957e-05	66.75	3.30867e-05	2	1529.74	-2.85378	24.6028	0
RSAEILER	1	1	1	A0A0J9VI21		0	0	0.01705	66.73	2.91946e-05	2	973.531	-11.5175	31.2476	1
TAEAHSTDDTQVK	1	4	1	A0A0J9V800		0	0	0.0001721	66.7	2.88197e-05	2	1402.64	-0.0531293	8.7609	0
YTAATcDPNDFTLK	1	2	1	A0A0J9WKP4	C6(Carbamidomethyl)	0	0	0.000291	66.67	3.33358e-05	2	1616.72	-2.43686	42.3086	0
GIAALAYNVLLR	1	1	1	A0A0D2XNG1		0	0	0.0001596	66.64	4.1078e-06	2	1273.76	-1.24458	52.3785	0
QAAGESGDSINR	1	1	1	A0A0D2XCN6		0	0	3.628e-05	66.63	2.34652e-05	2	1204.56	-0.190934	11.981	0
STGcKPIADIDSFTEDK	2	1	1	A0A0D2X9D6	C4(Carbamidomethyl)	0	0	8.02e-06	66.62	4.65703e-05	3	1883.87	0.29717	44.376	0
EILGESDETISSK	1	1	1	A0A0D2XEA1		0	0	0.0002307	66.59	3.1993e-05	2	1407.68	-3.14113	34.4071	0
IETGVIKPGmVVTFAPSNVTTEVK	1	2	1	A0A2C8D0A4	M10(Oxidation)	0	0	1.585e-08	66.58	1.86818e-05	3	2533.36	-0.757047	49.9179	0
LVPGAGATEVELVER	2	1	1	A0A0D2XDT4		0	0	2.206e-05	66.57	1.6544e-05	2	1539.84	-1.49008	48.2134	0
MEADGFIQPVEQDR	1	1	1	A0A0D2XK80		0	0	0.0002111	66.55	3.67595e-05	2	1634.74	-6.28407	46.9051	0
EcNFPSIAVHSGVSQEER	2	4	1	A0A0D2XGU4	C2(Carbamidomethyl)	0	0	0.001098	66.55	5.35901e-05	2	2045.93	-1.19202	40.1673	0
KAANVTGDAVDK	1	1	1	A0A0D2Y1Z2		0	0	0.01263	66.5	2.68647e-05	2	1188.62	-1.40873	10.8041	1
LSGkTLLEAIDSIEPPK	1	2	1	A0A2C8D0A4	K4(GlyGly)	0	0	1.994e-05	66.5	1.35331e-05	3	1925.06	1.09767	51.8893	1
EVAAFAQFGSDLDAATK	1	2	1	A0A0J9WFZ0		0	0	3.408e-07	66.49	3.94474e-05	2	1740.84	-0.888348	51.2203	0
WATPLTTDAVAR	1	2	1	A0A0J9V8E7		0	0	0.001219	66.48	2.62577e-05	2	1301.68	-3.49229	47.0891	0
LVTITGTEEcNR	1	2	1	A0A0D2X8X3	C10(Carbamidomethyl)	0	0	0.0007159	66.43	2.98607e-05	2	1392.69	4.60475	30.8858	0
SGGVNTNISK	1	1	1	A0A0D2X9D6		0	0	0.0006757	66.41	2.68901e-05	2	976.506	-0.307768	14.7075	0
VHTVVVSAQHSPDISTEELR	3	2	1	A0A0D2X9R5		0	0	3.864e-05	66.4	3.52679e-05	2	2204.13	1.4361	35.2269	0
TPIAWEPVDVTPIIK	2	1	1	A0A0D2XQN4		0	0	2.778e-05	66.32	1.10373e-05	2	1678.94	-1.63973	51.6909	0
TSGNYITIVGHNPDEGK	2	2	1	A0A0D2XDB1		0	0	6.32e-06	66.32	4.60741e-05	3	1801.87	-0.861344	36.3319	0
LDDLYIQTFEIK	1	1	1	A0A0D2X830		0	0	0.0001034	66.23	2.48119e-05	2	1497.78	-0.716391	51.6711	0
LVVPIGALYTPLK	1	3	1	A0A0J9URF5		0	0	0.0001924	66.13	1.6699e-06	2	1383.86	0.138998	51.9831	0
TAAcQTGEGSLR	1	4	1	A0A0D2YD73	C4(Carbamidomethyl)	0	0	0.006197	66.07	2.68182e-05	2	1250.58	1.52819	15.8904	0
LTEGcSFR	1	1	1	A0A0D2XW30	C5(Carbamidomethyl)	0	0	0.004363	66.05	2.83946e-05	2	969.445	-0.415837	23.3176	0
ELESVSSGDEFLEK	1	1	1	A0A0D2XPR8		0	0	6.947e-05	66.05	3.92956e-05	2	1568.73	-2.63785	46.2638	0
DSNGSEVILHTTK	2	5	1	A0A0D2XDB5		0	0	0.0004358	65.97	3.15783e-05	2	1400.7	1.60899	26.0969	0
QANENIVIALAGNK	1	1	1	A0A0D2XAU5		0	0	2.768e-05	65.96	1.89628e-05	2	1454.8	-0.790322	50.288	0
LTNSLmHHGR	1	1	1	A0A0D2XUS0	M6(Oxidation)	0	0	0.004278	65.94	3.33762e-05	2	1181.58	-2.72681	9.04043	0
KDELTLEGIK	2	1	1	A0A0D2XDK5		0	0	0.01226	65.92	2.1377e-05	2	1145.64	-1.39247	38.133	1
NQVAmNPQNTVFDAK	2	1	1	A0A0D2XA80	M5(Oxidation)	0	0	0.0001477	65.89	4.48924e-05	2	1692.8	0.0701557	34.0903	0
GIDPLSLDVLAK	1	2	1	A0A0D2XVQ3		0	0	0.0006285	65.81	1.45513e-05	2	1240.71	-0.616132	51.7924	0
TYDPFAEADEDTGETK	1	1	1	A0A0D2XI55		0	0	0.0001103	65.78	3.87641e-05	2	1788.74	-1.11694	46.1217	0
YGLIYHSSLIGQATGR	2	1	1	A0A0D2Y973		0	0	8.669e-06	65.74	3.30424e-05	3	1735.91	-2.18541	48.3568	0
GYLSEGGTLIGTAR	1	1	1	A0A0D2XQA8		0	0	0.0002419	65.72	3.32083e-05	2	1394.73	0.600678	47.7449	0
EGEESLDLR	1	2	1	A0A0J9ULC8		0	0	0.003651	65.65	2.27482e-05	2	1047.49	-3.09145	31.2488	0
VGDDGELYNEYDDK	1	2	1	A0A0D2XI90		0	0	9.017e-05	65.65	3.08346e-05	2	1631.67	-1.11443	36.9265	0
LHDIAALVGEDGEK	1	1	1	A0A0D2Y9B3		0	0	0.0002171	65.52	3.9248e-05	2	1466.75	-0.282772	42.4299	0
ELPPQDIDWFYVR	1	1	1	A0A0D2Y2F8		0	0	0.0003542	65.39	4.79853e-05	2	1677.82	-2.76783	52.0126	0
LQPAATESGAAVFPVNYFGR	1	1	1	A0A0D2XJN8		0	0	8.068e-06	65.39	5.01822e-05	2	2095.06	1.41141	51.3516	0
GFLFGPGLALR	1	1	1	A0A0D2XAY6		0	0	0.002104	65.35	1.25158e-05	2	1147.66	-1.51721	52.2697	0
TSEAVADVAR	1	1	1	A0A0D2Y4H6		0	0	0.001369	65.33	3.46725e-05	2	1018.52	1.00275	20.5287	0
TDATQEQTDVK	1	1	1	A0A0D2Y7J6		0	0	0.0003836	65.33	2.72866e-05	2	1235.57	-0.4377	11.5422	0
NPNVSTVILGATK	1	1	1	A0A0D2YJ82		0	0	0.0001098	65.21	2.18594e-05	2	1313.74	-0.0335918	47.5529	0
YWEAFGPATFITR	1	1	1	A0A0D2YG02		0	0	1.275e-05	65.19	4.55248e-05	2	1558.77	0.245968	52.1483	0
VHVTQEDFELATAK	2	1	1	A0A0D2Y496		0	0	0.0009145	65.18	4.63579e-05	2	1587.8	-0.886096	39.6987	0
AGLIFVGPSPDVIDSLGDK	1	3	1	A0A0J9WHE4		0	0	2.905e-06	65.17	3.3693e-05	2	1900.01	1.25436	52.1096	0
AVLSTQAAEcAQTIR	1	1	1	A0A0D2XDU2	C10(Carbamidomethyl)	0	0	0.001011	65.1	4.82859e-05	2	1618.82	-1.57141	37.6491	0
NEDGNDHTFGDDIAEAAER	2	1	1	A0A0D2XI35		0	0	0.0001852	65.1	5.38175e-05	3	2075.85	0.378675	43.5083	0
APQENISLGPSVR	3	1	1	A0A0D2Y2S1		0	0	0.002252	65.08	2.79721e-05	2	1367.73	-1.59956	36.9224	0
NQGTHGVHGSPLK	3	4	1	A0A0D2XN20		0	0	0.0006573	65.07	3.88187e-05	2	1331.68	-1.06631	10.044	0
TDELQVASLNLFDK	1	1	1	A0A0D2XX39		0	0	3.377e-05	65.03	4.61655e-05	2	1592.81	-2.68442	51.7729	0
LINDSVPDTIDER	1	1	1	A0A0D2XNN3		0	0	0.001948	65.01	4.44067e-05	2	1486.74	-0.574999	40.6945	0
QSITEIEAR	1	4	1	A0A0D2XNM1		0	0	0.004099	65	3.66192e-05	2	1046.55	-0.52034	29.1797	0
YIHDQHPSIGFTDLAK	3	1	1	A0A0D2X8I1		0	0	0.0001004	64.99	5.43422e-05	2	1841.92	1.32933	40.5568	0
aSRPTVSIIGK	1	1	1	A0A0D2XCJ2	N-Term(Acetyl)	0	0	0.007286	64.97	1.8134e-05	2	1170.69	1.64558	37.2102	0
YTGEAITPFTESLGQALVR	1	2	1	A0A0J9ULC8		0	0	1.506e-06	64.97	4.40852e-05	2	2053.06	-0.25006	52.0169	0
SVAGYETPYDNVDTVLIR	1	1	1	A0A0D2XQN4		0	0	3.449e-05	64.96	6.4134e-05	3	2012	0.234832	50.9051	0
ATSETLNASQSR	1	1	1	A0A0D2XHE4		0	0	0.0008162	64.94	3.66156e-05	2	1264.61	-0.185727	14.6239	0
YISELVTSK	1	1	1	A0A0D2XQ76		0	0	0.006585	64.93	1.55702e-05	2	1039.57	1.55816	35.9176	0
SLVHEIVLVGGSTR	3	1	1	A0A0D2XA80		0	0	8.943e-05	64.92	1.37379e-05	2	1466.83	-1.78456	48.4801	0
QITVNDLPVGR	1	4	1	A0A0J9VF77		0	0	0.004216	64.9	1.82669e-05	2	1211.67	-0.871462	44.2129	0
EYAAVASNNLSGAGLK	1	1	1	A0A0D2YEQ7		0	0	0.0001926	64.89	4.6786e-05	2	1564.8	-0.203894	39.031	0
SGSTVSSGQR	1	1	1	A0A0D2XJU4		0	0	0.007879	64.88	2.56656e-05	2	965.466	0.892249	7.24937	0
LPGPcATAEYVK	2	1	1	A0A0D2XAY6	C5(Carbamidomethyl)	0	0	0.0001667	64.83	4.03665e-05	2	1305.65	1.49524	37.8892	0
AALEAcHK	2	3	1	A0A0D2XMM8	C6(Carbamidomethyl)	0	0	0.009728	64.8	1.55135e-05	2	899.44	-0.598556	8.92044	0
ADLVNNLGTIAR	2	1	1	A0A0D2XK76		0	0	0.0002812	64.75	2.95942e-05	2	1256.7	0.628236	48.1521	0
VPNSAIQLVTTR	1	1	1	A0A0D2XMV7		0	0	3.184e-05	64.73	2.19237e-05	2	1298.74	-0.194081	45.4364	0
LTSSIIFHGAQGSGK	2	1	1	A0A0D2Y968		0	0	8.381e-06	64.7	3.89163e-05	2	1502.8	0.297551	36.0102	0
THGFSGADIGFITQR	1	5	1	A0A0D2XZD6		0	0	8.627e-05	64.7	5.3944e-05	2	1606.8	-0.767486	49.526	0
MSTTEYLNYEGGK	1	1	1	A0A0D2XGY9		0	0	5.347e-05	64.67	4.80058e-05	2	1492.66	0.355181	40.3978	0
MLATLQGVEAVK	1	1	1	A0A0D2XQA8		0	0	0.0004923	64.66	2.5221e-05	2	1259.7	1.40997	47.7328	0
RPVDKPLR	2	2	1	A0A2C8D0A4		0	0	0.004901	64.64	3.98527e-06	3	980.599	-0.800022	8.85099	0
DVLQIIEGVFESAK	2	1	1	A0A0D2XKD9		0	0	0.001207	64.64	3.30675e-05	2	1547.83	1.47212	54.9998	0
GLGSSGAAVVAGVALGK	1	2	1	A0A0D2XMF0		0	0	2.918e-06	64.6	2.21565e-05	2	1413.81	-0.0165707	50.1992	0
GEGDQAPGVQAGDVVFEIEQKPHAR	2	2	1	A0A0D2XDM0		0	0	7.181e-07	64.51	9.12428e-05	3	2634.29	-0.789913	49.5084	0
ISVYTADK	1	1	1	A0A0D2X879		0	0	0.01268	64.5	2.93076e-05	2	896.472	-0.5476	24.74	0
EDASNNYAR	1	1	1	A0A0D2XAP0		0	0	0.008058	64.47	2.20973e-05	2	1039.44	0.406213	11.0319	0
LASGVTEDMIR	1	1	1	A0A0D2YG02		0	0	0.0001033	64.46	4.0626e-05	2	1191.61	1.38053	39.2184	0
LSNEDWLLR	1	2	1	A0A0D2XLD2		0	0	0.008594	64.41	4.01003e-05	2	1145.59	-0.304828	50.7153	0
QREPGENQIDYGAVDGK	1	3	1	A0A0J9VBI1		0	0	0.0003016	64.39	8.28816e-05	3	1875.88	0.315539	29.4688	1
VDVLDPALLR	1	1	1	A0A0D2Y1V9		0	0	0.003998	64.38	8.49877e-06	2	1110.65	-1.66691	51.0936	0
ATGGEVGASSALAPK	1	1	1	A0A0D2XJV1		0	0	0.0008661	64.38	4.49924e-05	2	1315.69	0.130049	26.3947	0
GDVGAVVGcLR	1	1	1	A0A0D2XAL2	C9(Carbamidomethyl)	0	0	0.001398	64.35	4.21456e-05	2	1102.56	-2.32038	40.8914	0
NDLNASDMFDGR	1	5	1	A0A0D2XDB5		0	0	0.0003123	64.35	3.46714e-05	2	1354.56	-3.52923	45.5539	0
GQTVASSSVLNTTNK	1	2	1	A0A0D2XDP4		0	0	0.0004861	64.35	4.91424e-05	2	1506.77	-0.699128	27.8948	0
TSEELVQIIR	1	2	1	A0A0D2X9R5		0	0	0.0005406	64.31	3.20453e-05	2	1187.66	0.146764	49.6878	0
IFVQEGIYDK	1	1	1	A0A0D2XAL2		0	0	0.0004575	64.31	3.13781e-05	2	1211.63	-0.342248	42.3203	0
FAVLNQLDR	1	2	1	A0A1D6QVK6		0	0	0.006884	64.3	2.96114e-05	2	1075.59	4.54321	48.7854	0
SAPDPEADAGQAAEGEAELVSR	1	1	1	A0A0D2XZE9		0	0	0.002528	64.3	8.90756e-05	2	2169.99	2.23091	47.6158	0
ILTVSGIVDAVAK	1	2	1	A0A0D2X8X3		0	0	0.0001186	64.24	1.11881e-05	2	1285.77	0.268724	51.9602	0
SLLNAAAAAGQVK	1	3	1	A0A0J9UQD6		0	0	0.0001069	64.23	2.77893e-05	2	1213.69	0.106926	42.7201	0
EQQDEYAIQSYR	1	1	1	A0A0D2XX83		0	0	0.001012	64.23	5.69001e-05	2	1529.69	-0.969505	35.3123	0
LTFAEGQALLR	1	1	1	A0A0J9UI89		0	0	0.0006948	64.22	2.53746e-05	2	1218.68	-2.6303	50.5672	0
FADPEVQADMK	1	1	1	A0A0D2XA80		0	0	0.0003189	64.2	4.0167e-05	2	1250.57	-0.332934	35.6008	0
AcPAGAEAGVTTSIR	1	1	1	A0A0D2X8J5	C2(Carbamidomethyl)	0	0	3.211e-05	64.15	5.81887e-05	2	1460.72	0.466376	30.3512	0
AVDEEVVSR	1	2	1	A0A0J9WPA8		0	0	0.002357	64.09	4.28351e-05	2	1003.5	-0.588825	21.2182	0
HIDELDEPTAR	1	2	1	A0A0J9V474		0	0	0.002675	64.09	5.3773e-05	2	1295.62	-2.50763	24.2577	0
KDLYGNIVmSGGTTmYPGLSDR	1	1	1	A0A2C8D194	M9(Oxidation); M15(Oxidation)	0	0	0.001075	64.08	0.000106895	3	2407.13	0.403595	47.0934	1
VDDGDHDLAGIEAAIK	3	4	1	A0A0D2XN20		0	0	7.284e-05	64.06	6.98908e-05	2	1638.79	-1.71727	49.8123	0
LATDAENGGTNK	1	1	1	A0A0D2XER4		0	0	7.876e-05	64.04	4.50667e-05	2	1190.57	2.38815	10.3618	0
TSDLALDLLEK	1	2	1	A0A0C4DHU3		0	0	0.0001262	64.02	4.01628e-05	2	1217.66	-0.918826	51.2518	0
VNQAISLLTTGAR	2	1	1	A0A0D2XUS0		0	0	0.0006725	64	2.5877e-05	2	1343.76	-1.7212	49.8428	0
GAAQNIIPSSTGAAK	2	1	1	A0A0D2XVJ4		0	0	8.696e-05	63.99	4.14188e-05	2	1385.74	-0.221248	30.8719	0
GVLAYNQEDGTLHR	1	1	1	A0A0D2XCC1		0	0	0.0004351	63.97	6.474e-05	2	1572.77	-2.7257	32.5443	0
LEGLFNFLPATAAK	1	1	1	A0A0D2XNG1		0	0	4.146e-05	63.96	3.0737e-05	2	1491.82	-1.84514	52.5236	0
NDPLSGAVIAAIMQEAGLR	1	1	1	A0A0D2Y8T0		0	0	0.000685	63.93	4.73758e-05	2	1926.01	0.0420081	53.8457	0
AGPLGQLFRPDNFVAGNASAGNNWAK	1	1	1	A0A0C4DHQ2		0	0	9.249e-08	63.91	9.18968e-05	3	2672.33	-1.17658	51.0949	0
IDPLIAELVTGSK	1	4	1	A0A0D2XNM1		0	0	5.004e-05	63.86	2.3785e-05	2	1355.78	-1.71626	52.2093	0
ESDDAGSAHVEDGVK	1	2	1	A0A0J9WLE6		0	0	0.002934	63.86	5.18049e-05	2	1515.66	-0.349858	15.196	0
FKGEIQVPELINSAGEK	1	3	1	A0A0J9WHE4		0	0	0.0001386	63.86	4.60282e-05	2	1858.99	-1.83157	49.9653	1
FPENSVSLYAAK	1	1	1	A0A0D2XZN4		0	0	8.335e-05	63.81	4.98053e-05	2	1325.67	-0.836066	43.9093	0
GPEAQGGLEVDGVK	1	1	1	A0A0D2XXJ9		0	0	0.001145	63.8	4.63767e-05	2	1355.69	3.69331	32.8063	0
LDTYSEVYR	1	1	1	A0A0D2XEN0		0	0	0.004672	63.72	4.50521e-05	2	1145.55	-0.693915	34.5154	0
LFGPDETESNK	1	2	1	A0A0D2XVR8		0	0	0.0001707	63.7	4.63692e-05	2	1236.57	0.539774	29.7887	0
VNIGQILMSVR	1	2	1	A0A0D2XMI5		0	0	0.001844	63.68	3.10483e-05	2	1229.7	-1.87186	52.2869	0
TLINNLIIGVTK	1	1	1	A0A0J9U592		0	0	0.0006052	63.62	6.01797e-06	2	1298.8	-0.112837	51.924	0
LGLDTQEDALK	1	1	1	A0A0D2XKD9		0	0	0.0002652	63.57	5.05033e-05	2	1202.63	0.320368	39.7411	0
TIYSTPSTDADESSR	1	1	1	A0A0D2XC36		0	0	0.001643	63.56	6.36382e-05	2	1629.72	-2.30771	26.3043	0
LSDLLDWK	1	1	1	A0A0D2XDM3		0	0	0.01863	63.46	4.88234e-05	2	989.53	-0.689909	51.1712	0
IAILTcAFEPPKPK	1	2	1	A0A0D2XQB6	C6(Carbamidomethyl)	0	0	0.0002691	63.44	3.38994e-05	3	1584.88	0.638777	50.1313	0
AVDEIVLVGGSTR	2	1	1	A0A0D2XAH7		0	0	0.0009177	63.43	4.47132e-05	2	1315.72	-2.00617	46.4918	0
SLEGTNYTSTPR	1	1	1	A0A0D2XFY3		0	0	0.000522	63.4	6.41752e-05	2	1325.64	2.67422	26.3905	0
YADIVTTTTHK	1	2	1	A0A0D2XVN0		0	0	0.0002836	63.36	5.45508e-05	2	1249.64	-1.51471	24.3117	0
IcHTcGSTELSR	2	2	1	A0A0D2X858	C2(Carbamidomethyl); C5(Carbamidomethyl)	0	0	0.0006866	63.36	5.89333e-05	3	1420.63	-0.391827	15.1462	0
NWTEDPEVFETLR	1	2	1	A0A0D2XDM0		0	0	0.0001207	63.34	7.67932e-05	2	1635.76	-2.20152	51.1238	0
GGKPIVIcNPSDEEFK	2	2	1	A0A0D2X8I1	C8(Carbamidomethyl)	0	0	6.415e-05	63.34	8.49962e-05	2	1789.88	-0.0287457	37.8186	0
ILEQANQEDDR	1	1	1	A0A0D2XLQ6		0	0	0.0009436	63.33	5.86915e-05	2	1330.62	0.49581	19.3808	0
GEESETQQALK	1	2	1	A0A0D2XDZ8		0	0	0.002667	63.32	5.16102e-05	2	1219.58	-1.61425	17.1967	0
QGTFHAQQAIEYGTK	3	1	1	A0A0D2XK89		0	0	0.0003261	63.31	8.13154e-05	2	1678.82	-1.96581	30.96	0
ITALSVISDIAK	1	1	1	A0A0D2XUH4		0	0	0.0002279	63.3	1.09684e-05	2	1230.73	0.65609	51.9804	0
VDTSVLPSSDSPPDQGVTR	2	1	1	A0A0D2Y916		0	0	0.002517	63.3	9.46696e-05	2	1956.95	-0.626828	38.5324	0
VLITTNVLAR	1	2	1	A0A0J9WKQ6		0	0	0.0008417	63.27	8.21855e-06	2	1099.68	0.866131	47.783	0
MSVYFNEASGNK	1	5	1	A0A0C4DHT3		0	0	3.652e-05	63.24	6.3833e-05	2	1346.6	-0.0308285	38.7511	0
GILTDISEAK	1	2	1	A0A0J9WNE3		0	0	0.003624	63.21	4.09243e-05	2	1046.57	0.749777	47.7202	0
GYDPGQDTYQAPPSDR	1	1	1	A0A0D2XIG0		0	0	0.001433	63.2	8.00509e-05	2	1766.76	-0.1648	28.3753	0
EIFEQPESVVNTMR	1	2	1	A0A0D2X8I1		0	0	3.997e-05	63.19	8.32098e-05	2	1678.81	-1.73725	50.1885	0
INNALGQLLLAR	1	1	1	A0A0D2Y8Q2		0	0	6.207e-05	63.16	9.25058e-06	2	1295.78	-1.88008	51.6299	0
AAVENISRPK	2	3	1	A0A0J9WHE4		0	0	0.003376	63.14	2.74188e-05	2	1084.61	0.692077	15.8683	0
TPSEYIQWR	1	1	1	A0A2C8CXF1		0	0	0.001004	63.13	5.6934e-05	2	1179.58	-0.671842	45.3714	0
AAAVTALAK	1	1	1	A0A0D2XI04		0	0	0.002465	63.09	3.59345e-05	2	815.5	1.42382	22.9289	0
YYDTLGVAPTATEQELK	1	1	1	A0A0D2XDM0		0	0	1.075e-05	63.08	9.13963e-05	2	1898.94	0.0741419	49.3346	0
VPQGVHNVLVDFITR	1	3	1	A0A0D2XUT8		0	0	1.178e-05	63.07	2.80616e-05	3	1693.94	-1.06948	51.3755	0
IGPTLESLVK	1	3	1	A0A0J9UQD6		0	0	0.002837	63.06	2.59513e-05	2	1056.63	-0.750794	50.4137	0
IQAVIEAGIPR	1	1	1	A0A0D2XCN6		0	0	0.0003651	63.02	8.95498e-06	2	1166.69	-1.35566	44.5156	0
TTLQNVLGVLR	1	1	1	A0A0D2XCQ6		0	0	0.0005113	63.02	2.20756e-05	2	1213.72	-1.39597	51.6973	0
EVAVSTNEGNR	1	1	1	A0A0D2XVP6		0	0	0.002266	63.01	4.90534e-05	2	1175.56	-0.561923	14.9984	0
VTPTVTDIIIR	2	1	1	A0A0D2XZN4		0	0	0.001509	63.01	2.53017e-05	2	1227.73	-1.20194	50.4316	0
IVTNSQGSPTR	1	3	1	A0A0J9VL16		0	0	0.008067	62.99	5.76689e-05	2	1159.61	0.626163	12.0957	0
TAIVTGSSK	1	1	1	A0A0D2XJ00		0	0	0.004647	62.98	2.4596e-05	2	863.481	-2.74205	12.5292	0
DLEEDHAGVPLIISDPVVQYR	1	2	1	A0A0J9UYI6		0	0	9.8e-06	62.98	9.04287e-05	2	2365.2	-2.83121	51.1883	0
DAILLVFANK	1	2	1	A0A0D2X919		0	0	0.001261	62.97	1.65277e-05	2	1103.65	0.498958	51.9872	0
IcVATDVFGR	1	4	1	A0A0D2XGU4	C2(Carbamidomethyl)	0	0	0.001816	62.91	6.23996e-05	2	1137.57	-1.37228	48.6953	0
VVSLNSEANDLK	1	1	1	A0A0D2XDK3		0	0	0.0001702	62.9	6.54155e-05	2	1288.67	-1.0554	36.514	0
EQAADVDQETLK	1	4	1	A0A0J9UMY7		0	0	0.0005348	62.89	7.03469e-05	2	1346.64	0.0898428	24.1595	0
EHVQYEDGDDLSR	1	1	1	A0A0D2Y2H9		0	0	0.0008218	62.88	6.71858e-05	2	1562.67	-1.17864	23.4456	0
LADDGDISAIK	1	1	1	A0A0D2Y7J6		0	0	0.000403	62.87	5.97752e-05	2	1117.57	-4.76606	34.1291	0
LVAccEVVQK	1	1	1	A0A0D2XBN3	C4(Carbamidomethyl); C5(Carbamidomethyl)	0	0	0.002158	62.84	5.61856e-05	2	1205.6	-1.12799	25.8142	0
ILEQQQQQALLAQQQAQLQAQR	1	1	1	A0A0D2XI67		0	0	4.076e-06	62.84	4.10277e-05	3	2562.37	-0.207075	46.3577	0
GLGVDATTLEPR	1	1	1	A0A0D2XVJ7		0	0	7.407e-05	62.82	4.87396e-05	2	1228.65	-0.409994	43.1124	0
EPIASALcAK	1	1	1	A0A0D2XLD4	C8(Carbamidomethyl)	0	0	0.008511	62.81	5.90098e-05	2	1059.55	-3.24922	33.9864	0
GLSAVAQcESLR	1	1	1	A0A0D2XZN4	C8(Carbamidomethyl)	0	0	9.507e-05	62.8	6.51548e-05	2	1290.65	0.486095	35.6708	0
VDSLVSAQGTPPAAR	1	2	1	A0A0J9V9J5		0	0	0.0004188	62.74	4.65595e-05	2	1468.78	2.8591	31.1805	0
GSAFScAILSPVFR	1	4	1	A0A0D2XJR4	C6(Carbamidomethyl)	0	0	0.00014	62.66	6.69642e-05	2	1511.77	2.36839	51.7297	0
AFSGTIEPVAQVLK	1	1	1	A0A0D2XAH7		0	0	0.0001474	62.59	3.9906e-05	2	1459.81	-1.9109	50.5881	0
GSIGQGSSQLPVR	1	1	1	A0A0D2Y2D2		0	0	0.001425	62.58	5.71952e-05	2	1285.69	0.292136	30.7281	0
AVANQTSATFLR	1	2	1	A0A0J9UND6		0	0	0.0003983	62.57	5.76314e-05	2	1278.68	0.740272	36.6683	0
DGLTDSFK	1	2	1	A0A0D2XPN3		0	0	0.01985	62.56	6.23399e-05	2	882.421	0.294146	36.3916	0
AALLAGVDTLAK	1	1	1	A0A0D2XVI4		0	0	0.0006845	62.56	2.65943e-05	2	1142.68	-0.743585	50.1847	0
NNAQQALLSNLK	1	2	1	A0A0D2Y5G5		0	0	0.0001658	62.56	4.706e-05	2	1313.72	1.55633	46.0614	0
ADTLTVEER	1	2	1	A0A0J9WMF7		0	0	0.006156	62.55	5.66744e-05	2	1033.52	1.84867	24.4713	0
LVSAASNVTLQK	1	1	1	A0A0D2XJU2		0	0	0.0003211	62.55	3.40213e-05	2	1230.7	-1.91179	30.4268	0
NEELAAELGRPEK	2	1	1	A0A0D2Y973		0	0	0.0008499	62.52	6.98857e-05	2	1455.74	-3.2272	32.2019	0
ASAQTIATAQNIAPGK	1	1	1	A0A0D2XX62		0	0	0.001363	62.51	4.97089e-05	2	1541.83	0.886053	31.2648	0
AGKDEGATIETGGER	1	1	1	A0A0D2XAL2		0	0	0.0009435	62.49	8.34466e-05	2	1490.71	-0.527428	14.6828	1
VVEGSSAVER	1	1	1	A0A0D2X8L1		0	0	0.003386	62.48	6.44028e-05	2	1032.54	5.98942	14.7958	0
VNLTDPSGAEVK	1	1	1	A0A0D2XZD6		0	0	0.0006587	62.48	6.07872e-05	2	1229.63	-2.69395	31.7332	0
LLLIGDSGVGK	1	2	2	A0A0D2Y939;A0A0D2XWY5		0	0	0.002166	62.47	2.7774e-05	2	1071.64	0.242227	49.8903	0
ELIGAQGSQINR	1	2	1	A0A0D2XQE1		0	0	9.735e-05	62.47	5.77281e-05	2	1285.69	1.14665	29.667	0
FEIWDTAGQER	1	2	2	A0A0D2XAU5;A0A0D2XZG3		0	0	0.0002442	62.4	7.33398e-05	2	1351.63	-0.931365	50.2829	0
SQLNDLVADYK	1	2	1	A0A0D2XMM8		0	0	0.001524	62.39	6.95004e-05	2	1265.63	-2.50507	48.3516	0
LHFFMVGFAPLTGR	1	2	1	A0A0C4DHQ2		0	0	0.000347	62.38	6.58451e-05	3	1592.84	0.326069	52.1177	0
SPSLVYFAAYPILPDPALK	1	2	1	A0A0D2XUU5		0	0	1.473e-05	62.31	3.79224e-05	2	2062.13	0.948528	52.7572	0
GTETEESIQQR	1	2	1	A0A0J9V2G7		0	0	0.0005729	62.3	6.2388e-05	2	1277.59	-2.1991	16.2271	0
HDGAINVILPK	2	1	1	A0A2C8CXF1		0	0	0.007301	62.29	2.85362e-05	3	1176.67	-1.53332	40.1793	0
VQNcVcLPYK	1	1	1	A0A0D2XR18	C4(Carbamidomethyl); C6(Carbamidomethyl)	0	0	0.004505	62.22	7.61135e-05	2	1280.61	-1.64614	37.0657	0
VAGMTNLDSAR	1	2	1	A0A0D2XWB2		0	0	0.00235	62.2	5.89906e-05	2	1134.56	1.1176	29.5609	0
cAPFGGVVVSPETGR	1	1	1	A0A0J9VER4	C1(Carbamidomethyl)	0	0	0.0009374	62.15	9.36553e-05	2	1532.76	1.78984	46.9616	0
LNPYASVFAQEAQK	1	2	1	A0A0D2XCJ2		0	0	0.0001919	62.14	8.54708e-05	2	1565.79	-0.744649	50.1247	0
LLQETSPGTYNFDK	1	2	1	A0A0D2X916		0	0	5.893e-05	62.14	9.90337e-05	2	1612.79	0.571174	42.4554	0
TALAVAAIPER	1	2	1	A0A0J9UEA1		0	0	0.005185	62.1	1.9731e-05	2	1111.65	-1.67508	41.2596	0
DGTTmLWDLNESK	1	1	1	A0A0C4DHS7	M5(Oxidation)	0	0	0.00135	62.06	8.89578e-05	2	1525.68	-2.69987	50.156	0
TPGPGAQSALR	1	2	1	A0A0D2Y2S1		0	0	0.002006	62.03	3.68762e-05	2	1054.56	-2.45821	20.6729	0
NDEATLTEEEKR	1	2	1	A0A0C4DHV9		0	0	0.0254	62	8.4359e-05	2	1434.67	-0.0414063	19.107	1
DVSPAPSASSISSAASR	1	3	1	A0A0J9UEA5		0	0	0.0003198	61.99	0.000104822	2	1589.77	-1.5951	33.0494	0
IGGIGTVPVGR	3	2	1	A0A2C8D0A4		0	0	0.002235	61.97	1.41679e-05	2	1025.61	0.243691	37.2006	0
LIAIDPDETTR	1	1	1	A0A0D2XUH4		0	0	0.001311	61.97	6.65827e-05	2	1243.65	1.14435	40.3255	0
GHDVIAQAQSGTGK	2	1	1	A0A0D2XDK5		0	0	8.578e-05	61.97	7.64621e-05	2	1368.69	-0.704878	16.5778	0
LADSNSAQIKPLK	1	1	1	A0A0J9WML6		0	0	0.0007071	61.95	3.87426e-05	2	1384.78	1.98794	23.9776	0
EANTVHHIR	2	2	1	A0A0J9WHE4		0	0	0.003165	61.92	6.69038e-05	2	1076.56	-1.68541	8.3914	0
LGPEYSTLAELLDVK	1	2	1	A0A0D2Y5G5		0	0	1.414e-05	61.92	6.12803e-05	2	1647.89	1.35129	52.6648	0
GSLGVNPNQYEEPTDLAR	1	1	1	A0A0J9WLK1		0	0	0.00631	61.91	0.000139141	2	1959.94	-0.196988	45.9118	0
EAQSVTDKPTLIQLR	3	4	1	A0A0D2XN20		0	0	0.0005897	61.9	4.62611e-05	2	1698.94	-1.38114	40.8967	0
sVVSLLGVNVLNNPAK	1	1	1	A0A0D2X9Z4	N-Term(Acetyl)	0	0	0.0001983	61.86	1.89298e-05	2	1665.96	2.74864	53.4851	0
LLFLGLDNAGK	1	1	1	A0A0D2XEG6		0	0	0.0005664	61.85	3.48119e-05	2	1160.67	-0.0390317	51.6596	0
HFLEEQSYDK	1	1	1	A0A0D2XWV9		0	0	0.0007665	61.82	7.1323e-05	2	1295.59	-0.968242	26.8617	0
AEWPSLLEELVSK	1	1	1	A0A0D2XQA8		0	0	0.0003157	61.77	8.12299e-05	2	1500.79	-1.72814	53.0206	0
ELVSQIFDESR	1	1	1	A0A0D2XDN9		0	0	0.0006757	61.75	9.41362e-05	2	1322.66	-1.56313	50.6961	0
SLLEVVQTGAK	1	2	1	A0A0D2XE03		0	0	0.002582	61.72	4.45511e-05	2	1144.66	0.749004	47.8834	0
YNIIQSDLEDAYSSQVK	1	1	1	A0A0D2Y8T0		0	0	0.0001183	61.7	0.000143668	2	1972.95	0.121413	51.0677	0
DVAAGTLSTR	1	2	1	A0A0D2Y8P6		0	0	0.002187	61.66	7.44432e-05	2	990.521	-0.0306519	23.6824	0
LAEIVSAQAIAQQEK	1	1	1	A0A0D2XC01		0	0	8.955e-05	61.65	6.01158e-05	2	1598.87	-3.26155	45.0822	0
ESLLSIAK	1	1	1	A0A0D2XWU0		0	0	0.00418	61.58	3.34307e-05	2	860.509	-0.100765	44.1557	0
TPSWTDSLPGLK	1	1	1	A0A0D2YG01		0	0	0.0002263	61.58	7.90243e-05	2	1301.67	-1.6094	50.7823	0
TPcLLNPQLSR	1	1	1	A0A0D2XCL5	C3(Carbamidomethyl)	0	0	0.0003329	61.56	6.11302e-05	2	1298.69	-0.423058	44.6815	0
QSINSATLLFQLAQALALDR	2	3	1	A0A0J9VBI1		0	0	0.0002514	61.56	4.19638e-05	3	2173.19	-2.34782	54.3258	0
DESSLAEVEAEK	1	1	1	A0A0D2XNB1		0	0	0.0005526	61.55	8.10067e-05	2	1306.6	-2.85913	34.7318	0
TSQKPVSPEEGEEVR	2	1	1	A0A0C4DHX5		0	0	3.636e-05	61.49	0.000120628	3	1671.82	-0.247006	17.5399	0
AVTNEIVNVFK	1	1	1	A0A0D2XX10		0	0	0.0007507	61.48	5.03895e-05	2	1233.68	0.0520307	50.7951	0
ATPDMLGSTGSITITK	1	2	1	A0A0D2XVI4		0	0	0.0003414	61.47	9.70193e-05	2	1592.82	1.01805	48.4626	0
APTGSNTLILR	1	2	1	A0A0D2XNM9		0	0	0.000706	61.46	5.51234e-05	2	1142.65	-1.6845	36.9737	0
FTTFDLGGHQQAR	1	1	1	A0A0D2XEG6		0	0	3.362e-05	61.45	0.000100439	2	1477.72	-1.65349	38.5568	0
FDAPINGYGSSK	1	1	1	A0A0D2YG01		0	0	0.0002378	61.43	8.54346e-05	2	1255.6	0.383479	36.2062	0
QDAADIVLGQSDR	1	1	1	A0A0D2XHT9		0	0	0.0001615	61.39	0.000103615	2	1387.68	-2.2506	43.4683	0
IWTSDPSNPTQWESK	1	1	1	A0A0D2XPT3		0	0	0.00065	61.37	0.000143667	2	1775.82	-1.53333	47.3906	0
EVGAVLIYDEIQSGLGR	1	1	1	A0A0D2Y4D0		0	0	1.265e-05	61.36	9.09537e-05	2	1818.96	-1.70468	52.5223	0
IVTILQNPTQYK	1	1	1	A0A0D2XDE8		0	0	0.001152	61.33	4.08227e-05	2	1417.8	-1.72342	48.5774	0
EAEEKEYESLAK	2	2	1	A0A0D2XK76		0	0	0.001789	61.27	0.000110661	2	1425.67	-0.567954	25.8961	1
ELNLDHPIYLQTAK	2	2	1	A0A0D2X9R5		0	0	4.41e-05	61.27	7.01289e-05	2	1654.88	0.134905	48.4161	0
WEDIAGLEGAK	1	1	1	A0A0D2Y9E2		0	0	0.0001933	61.26	9.00422e-05	2	1188.59	-0.0640778	48.119	0
FSGVcHTDLHAWQGDWPLDTK	3	2	1	A0A0C4DHW5	C5(Carbamidomethyl)	0	0	1.424e-08	61.24	0.000218572	2	2470.13	0.298138	50.2294	0
TAANEAASASAAEGR	1	2	1	A0A0D2XQK7		0	0	0.0003561	61.23	0.000105997	2	1376.64	-1.65353	16.8036	0
TDVQTANAFFQR	1	1	1	A0A0D2Y960		0	0	0.000103	61.19	0.000102036	2	1397.68	-0.1944	46.2322	0
ASLILTGLGFNK	1	1	1	A0A0D2XK80		0	0	0.0002248	61.18	2.08048e-05	2	1233.72	-0.354326	51.5054	0
NAAPGQALADVEK	1	1	1	A0A0D2Y8Q2		0	0	9.115e-05	61.18	7.58269e-05	2	1283.65	-3.69011	34.3213	0
SLQDTVITPIDR	1	1	1	A0A0D2XII6		0	0	0.002306	61.18	8.02469e-05	2	1357.73	-1.08329	46.0698	0
HFSGLPSSAPQTSAYLASK	2	2	1	A0A0J9WGI7		0	0	0.0001886	61.17	0.000139133	2	1948.98	0.618458	42.2064	0
LDSLDENNTLSK	1	2	1	A0A0D2XIH6		0	0	0.0002412	61.16	9.22544e-05	2	1348.65	-3.45141	30.472	0
AFIDQLQSLAAR	1	1	1	A0A0D2XPR8		0	0	0.002216	61.14	6.7645e-05	2	1332.72	-3.2921	51.2899	0
AVVQVSSVAPLR	1	1	1	A0A0D2Y4L5		0	0	0.0001238	61.13	1.88871e-05	2	1225.73	0.202981	41.9134	0
TFESEAAHGTVTR	1	1	1	A0A0D2XM79		0	0	0.002007	61.09	0.000102429	2	1405.67	0.87595	23.0882	0
ALTGDLGGK	1	1	1	A0A0D2XQN4		0	0	0.01314	61.07	0.000103253	2	831.458	1.06208	24.0804	0
DGSGAIEPAESK	1	1	1	A0A0D2XIH4		0	0	0.0002176	61.06	7.32507e-05	2	1160.54	-0.968155	16.3832	0
VGGSSEVEVGEK	1	2	1	A0A0D2XVI4		0	0	0.0003795	61.05	8.15075e-05	2	1176.57	-0.478706	19.1538	0
IGSQLAILQR	1	2	1	A0A0J9WNB3		0	0	0.001634	61.04	2.52248e-05	2	1098.66	1.43545	46.6581	0
EFVPNVIEPSFGIGR	1	2	1	A0A0D2XD82		0	0	1.968e-05	61.03	9.81342e-05	2	1660.87	-1.2428	51.5635	0
LYSYVQAVNVK	1	1	1	A0A0D2Y4L7		0	0	0.000264	60.95	5.51219e-05	2	1283.7	-1.2774	43.7284	0
GGVIMDVTNAEQAR	1	1	1	A0A0D2XXD6		0	0	0.0009425	60.93	0.000122175	2	1460.72	0.3787	42.7272	0
TGNAVGLEVASK	1	1	1	A0A0D2XNG1		0	0	0.002004	60.92	8.56023e-05	2	1145.62	-0.7501	29.1501	0
QVANNGFQDSLALQSK	1	2	1	A0A0J9WJQ4		0	0	0.0005036	60.88	0.000126162	2	1719.87	-0.269274	42.7298	0
DTTGQQGEVAIK	1	2	1	A0A0D2XB54		0	0	0.004316	60.84	0.000104748	2	1246.63	1.51509	21.4133	0
GLQNYNEWVQR	1	1	1	A0A0J9V104		0	0	0.0009174	60.83	0.000112837	2	1406.68	-0.767758	45.6201	0
QYSAIGGGSPIR	1	2	1	A0A0J9UZZ6		0	0	0.0002765	60.79	8.09921e-05	2	1205.63	0.105924	33.538	0
LTEGIDNLDIK	1	2	1	A0A0D2XMN2		0	0	0.000243	60.76	9.24665e-05	2	1230.66	0.768397	45.8392	0
SPGSTIQILGAEK	1	1	1	A0A0D2Y973		0	0	1.688e-05	60.71	9.2773e-05	2	1300.71	-0.398723	43.2464	0
TGVSTIEAGSFVAPK	1	1	1	A0A0D2XAN9		0	0	9.199e-05	60.71	9.51931e-05	2	1463.77	0.572931	45.7652	0
ELAMQTSQVcK	1	1	1	A0A0D2Y8V4	C10(Carbamidomethyl)	0	0	0.01165	60.66	0.000101492	2	1294.61	-0.158142	27.3619	0
TSDPYEGATIASLR	1	1	1	A0A0D2XET1		0	0	0.0003708	60.64	0.000142176	2	1480.73	1.37412	45.5872	0
LPIPGWVDTVK	1	1	1	A0A0D2Y2F8		0	0	0.000612	60.63	3.11821e-05	2	1224.7	-1.57293	51.2455	0
TADTEEENENLAK	1	1	1	A0A0D2XZI9		0	0	0.0002291	60.62	0.000115176	2	1463.64	-4.74399	17.8952	0
LISPYVHFTPVLTNQTITK	1	1	1	A0A0D2XMV9		0	0	9.733e-06	60.6	4.37224e-05	3	2172.2	-1.45526	50.5994	0
GASDGGILVPHSEK	1	2	1	A0A0J9USN5		0	0	4.801e-05	60.57	0.000116904	2	1366.7	0.195677	27.2166	0
IVTEPLELTQAFR	1	2	1	A0A0D2XPW8		0	0	0.0002142	60.57	6.87569e-05	2	1516.83	-1.66204	51.5504	0
TQVGELLEYSNETK	2	1	1	A0A0D2XDB8		0	0	0.002947	60.56	0.000141654	2	1610.79	-2.67862	49.0024	0
QYTDLSENTQK	1	1	1	A0A0D2XGN1		0	0	0.001231	60.55	0.000115197	2	1326.62	-1.19335	21.81	0
LVLDEVTGEQVTR	1	2	1	A0A0D2Y2J4		0	0	0.002344	60.54	0.000106323	2	1458.77	-4.49574	45.9672	0
EVLQEESNVQPVK	1	1	1	A0A0D2XW77		0	0	0.0003436	60.54	0.000100318	2	1498.78	0.975073	30.6094	0
FIEGGEHQQTK	1	3	1	A0A0J9VBI1		0	0	0.0007219	60.52	0.000118701	2	1273.62	0.321925	12.0164	0
VAELSSDGR	1	3	1	A0A0J9VBI1		0	0	0.001777	60.5	7.12555e-05	2	933.463	-0.960062	16.3445	0
DASSAIGALVER	1	1	1	A0A0D2X9N5		0	0	0.0007081	60.48	0.000103638	2	1188.62	-0.587135	50.2931	0
ILGYADSEYVAHR	2	5	1	A0A0J9UBY2		0	0	0.01712	60.43	0.000137535	2	1493.73	-2.39165	38.4283	0
SPGAVQDVVGEAEcK	1	3	1	A0A0J9WLE7	C14(Carbamidomethyl)	0	0	0.0004562	60.43	0.000143649	2	1545.72	-3.12798	39.2389	0
VLQAATAENDNPDIR	1	2	1	A0A0J9V474		0	0	0.001213	60.43	0.000143242	2	1626.81	-1.19823	30.1136	0
LDQLSFGSLLK	1	3	1	A0A0J9UQD6		0	0	0.0007802	60.4	5.3763e-05	2	1220.69	-1.13863	51.6882	0
VEEIVSDPTLSLK	1	1	1	A0A0D2XAH7		0	0	2.832e-05	60.39	8.50125e-05	2	1429.78	-0.278036	49.5602	0
VANAGVSGNQDGGR	1	1	1	A0A0D2XCQ6		0	0	0.00289	60.36	0.00011409	2	1301.62	-2.36841	10.4781	0
TNEYAAAIISR	2	1	1	A0A0D2XQN4		0	0	0.0009289	60.34	0.000103104	2	1208.63	-0.118024	40.7909	0
DLTEEVWAVMDGK	1	1	1	A0A2C8CXF1		0	0	4.718e-05	60.34	0.000141201	2	1492.7	0.319635	53.0248	0
DGQTDSEVLYR	2	1	1	A0A0D2YH71		0	0	0.00239	60.32	0.000109525	2	1282.59	-1.36466	31.5505	0
SGLLALNK	1	1	1	A0A0D2XUT8		0	0	0.01907	60.3	6.83142e-05	2	815.499	0.0888906	38.4205	0
LWGDNYFNPK	1	1	1	A0A0D2XQM8		0	0	0.002707	60.28	0.000123008	2	1253.59	-1.73123	50.5354	0
GGKPNIEVEFK	4	1	1	A0A0D2XA80		0	0	0.003587	60.27	9.87649e-05	3	1217.65	-0.602169	34.4827	0
SGTLAPSLVAGFGEAcR	1	2	1	A0A0D2XN28	C16(Carbamidomethyl)	0	0	4.675e-05	60.21	0.000163547	2	1692.84	-0.591859	50.7468	0
SNAIILAVTAANQDLANSDGLK	1	2	1	A0A0D2XCK5		0	0	1.608e-05	60.18	0.000101409	3	2199.16	0.913123	52.3094	0
SEDGTEVEVR	1	1	1	A0A0D2XNA9		0	0	0.002588	60.07	8.61502e-05	2	1120.51	-3.45486	19.366	0
NQNNVQPLVNPR	1	1	1	A0A0D2Y5K0		0	0	0.001017	60.07	0.000108733	2	1392.73	-1.1328	27.939	0
FTDGFMIHSGQPAK	1	1	1	A0A0D2XZN4		0	0	0.000818	60.07	0.000145683	2	1535.73	-0.763958	38.9122	0
TGNLDIEDLK	1	1	1	A0A0D2XHS1		0	0	0.002646	60.06	0.000108491	2	1117.57	-1.26179	43.7824	0
FGSGLVVAR	1	1	1	A0A0D2XQE8		0	0	0.003301	60.05	4.78954e-05	2	905.521	0.192278	37.2355	0
LLVLATTSQPNVLK	1	1	1	A0A0D2Y968		0	0	0.002053	60.05	1.51249e-05	2	1496.91	0.237554	50.3244	0
IALPTFEPQALTELISK	1	1	1	A0A0D2XQG2		0	0	6.591e-06	60.01	4.80393e-05	2	1871.05	-2.41045	52.8608	0
EGVLNILR	1	1	1	A0A0D2XQV2		0	0	0.01554	60	5.445e-05	2	913.546	-0.505895	50.6895	0
TIGLDFEGLIADVK	1	2	1	A0A0J9VPV0		0	0	2.867e-05	60	8.97e-05	2	1490.81	-0.616846	52.6918	0
ScEQSQAGDNSGLLIR	1	1	1	A0A0D2XCJ5	C2(Carbamidomethyl)	0	0	0.0008128	60	0.00017975	2	1734.81	1.64693	36.766	0
VAILQPTLHPTSEELAIGNVR	2	1	1	A0A0D2XEG6		0	0	1.422e-06	60	4.725e-05	3	2258.25	-0.761617	50.2792	0
ILMVGLDAAGK	1	2	1	A0A0D2X919		0	0	0.001233	59.99	8.35421e-05	2	1087.62	0.353526	49.7507	0
AVITVPAYFNDNQR	1	1	1	A0A0D2XAH7		0	0	0.0002392	59.98	0.000140295	3	1607.82	-0.170626	50.3786	0
ADADLDYGTGPALVSR	1	2	1	A0A0D2XUE3		0	0	0.000155	59.97	0.000162922	2	1620.79	3.88755	44.449	0
LTQFETEAEAK	1	1	1	A0A0D2Y1Y9		0	0	0.0007539	59.95	0.000150422	2	1266.62	0.564131	29.7618	0
VEPIDDmPAGNIVGLVGIDQFLLK	2	2	1	A0A0J9UYI6	M7(Oxidation)	0	0	0.006212	59.95	0.000120125	2	2569.35	-3.67087	53.2954	0
HLEPVNIVLVGK	2	7	1	A0A0J9UPQ3		0	0	0.002911	59.93	2.0325e-05	2	1317.79	-1.27658	48.6966	0
EAAELWPR	2	1	1	A0A0D2XB71		0	0	0.01257	59.9	5.54113e-05	2	971.495	0.432715	42.7163	0
TVFIQELINNIAK	2	1	1	A0A0D2YC97		0	0	0.00027	59.9	4.18527e-05	2	1502.86	0.611419	53.0524	0
TVQVVPHITDAIQNWIER	1	6	1	A0A0J9UPQ3		0	0	1.239e-05	59.9	0.000108981	3	2119.13	-1.64197	51.8598	0
ATAETYAEAGGQEK	1	1	1	A0A0D2Y7J6		0	0	0.0004449	59.83	0.000147149	2	1425.65	2.08885	20.3238	0
DVIESAAAEEEQER	1	1	1	A0A0D2Y916		0	0	0.0003959	59.83	0.00017637	2	1575.71	-2.52148	38.212	0
VGIADTVGGATPR	1	3	1	A0A0J9UCC3		0	0	0.005264	59.8	8.37703e-05	2	1213.65	-3.00858	34.5071	0
NQVNDEEGLGGK	1	1	1	A0A0D2XQC1		0	0	0.0002211	59.8	0.000112619	2	1259.59	-0.251036	19.3987	0
ELVMTALR	1	1	1	A0A0D2XZI9		0	0	0.007331	59.79	8.19693e-05	2	932.521	-2.54966	44.5668	0
ALAPFKEEEEVEK	1	2	1	A0A0J9WKP4		0	0	0.0001932	59.78	0.000150273	2	1518.77	0.497428	34.9819	1
ITQAEQDVLDDK	1	2	1	A0A0D2XP11		0	0	0.0003525	59.76	0.000145894	2	1374.67	-1.19155	34.1052	0
TEHVVAVSAR	1	3	1	A0A0J9UQD6		0	0	0.003745	59.75	5.14797e-05	3	1068.58	0.431877	15.8064	0
KQEETVEDEDASAEAQLQR	1	1	1	A0A0D2Y4X5		0	0	0.0003022	59.72	0.000269689	3	2176	1.41391	31.0291	1
TAEYQVVR	1	1	1	A0A0D2XZN6		0	0	0.005629	59.71	8.92126e-05	2	965.504	-0.935584	24.2189	0
QASPGIVIALVGNK	1	1	1	A0A0D2XZG3		0	0	0.0001776	59.71	2.56573e-05	2	1366.8	-1.43325	50.9428	0
QSYYEALGLINNLLR	1	1	1	A0A0D2XA47		0	0	0.0007469	59.69	0.000114702	2	1766.94	-3.36267	53.2302	0
DTGIGMTK	1	1	1	A0A0D2XK76		0	0	0.01308	59.6	6.63369e-05	2	822.402	-0.588632	20.0288	0
HDDKEVSLGK	2	1	1	A0A0D2Y496		0	0	0.002935	59.58	8.97755e-05	2	1127.57	0.612394	11.3771	1
IDELLAAVDEWIPTPER	1	1	1	A0A0D2XCJ5		0	0	0.000495	59.58	0.00016804	3	1967.01	0.267985	53.326	0
LDQALDDITQAQR	1	2	1	A0A0D2Y8Z5		0	0	0.0002029	59.55	0.000156394	2	1486.74	-4.10523	42.2159	0
WEDVLPALDNK	1	1	1	A0A0D2XWU1		0	0	0.0001565	59.54	0.00012746	2	1299.66	0.74777	50.9177	0
cPVEAGEVEITK	1	1	1	A0A0D2XQP0	C1(Carbamidomethyl)	0	0	0.002037	59.53	0.000149204	2	1331.65	-0.858549	32.9774	0
AGDGLIQIR	1	1	1	A0A0D2XMC1		0	0	0.004511	59.47	7.50749e-05	2	942.535	-1.84668	40.8635	0
LVSTLGEVR	1	1	1	A0A0D2Y1W8		0	0	0.009475	59.47	8.82371e-05	2	973.565	-3.11995	33.6618	0
IAEGDGSEDEK	1	1	1	A0A0D2XWU0		0	0	0.0007776	59.46	9.99343e-05	2	1149.49	-0.126304	9.80606	0
NLYTQPGTSNTGK	1	1	1	A0A0D2XE36		0	0	0.0001117	59.45	0.000174167	2	1380.67	-1.38468	22.4034	0
QLGGDVDSLVR	1	2	1	A0A0J9WN66		0	0	0.0002628	59.42	0.000137374	2	1158.61	-0.0134439	43.2764	0
DEcTTFPQFHAR	2	1	1	A0A0D2Y9E9	C3(Carbamidomethyl)	0	0	0.0001973	59.42	0.000155546	2	1508.66	-2.26975	38.7706	0
EAGAPGAEGR	1	1	1	A0A0D2XUT9		0	0	0.0004739	59.38	7.15141e-05	2	914.433	0.560787	9.22363	0
GATLGQTSEASGPDPLGTESR	1	1	1	A0A0D2YH71		0	0	0.00841	59.38	0.000271523	2	2030.96	-2.9694	38.0529	0
NPVVELDGDEMTR	1	2	1	A0A0D2XM79		0	0	0.01437	59.35	0.000181012	2	1474.69	3.84332	42.9957	0
TDVQDVFR	1	4	1	A0A0D2XGU4		0	0	0.01134	59.33	0.000101046	2	979.484	-0.144777	40.5189	0
MQVIGGAGAVcVEK	1	4	1	A0A0J9UMY7	C11(Carbamidomethyl)	0	0	0.001833	59.28	0.000177166	2	1418.7	-7.44557	39.8281	0
ESSSYSVIPR	1	1	1	A0A0D2XAN8		0	0	0.00106	59.27	0.000133684	2	1124.56	-0.530443	33.9166	0
RPGLFLDPVDFVK	2	3	1	A0A0J9WHE4		0	0	0.004141	59.27	7.99145e-05	2	1502.84	-0.368723	51.5465	0
VGQAVDVVGQAGRPK	2	2	1	A0A0D2XWB2		0	0	0.0001191	59.24	6.91516e-05	2	1480.82	-2.04302	25.5068	0
VDFNVPLDADK	1	3	1	A0A0D2Y5W3		0	0	8.781e-05	59.23	0.000146084	2	1232.62	-0.528467	49.1343	0
DVAQAHQDIESR	1	2	1	A0A0D2XYW5		0	0	0.0008603	59.21	0.000173687	2	1368.65	-0.249412	17.2634	0
FPGQLNSDLR	6	5	2	A0A0C4DHT3;A0A0C4DHQ2		0	0	0.0006613	59.2	0.00014319	2	1146.59	-1.48504	39.7783	0
TLLVADNR	1	1	1	A0A0D2Y5E6		0	0	0.01452	59.18	0.000172717	2	901.51	-0.0242541	28.9081	0
IYQPPIEEDDEAAAQHAR	1	2	1	A0A0D2XCA9		0	0	7.069e-06	59.17	0.000283825	3	2052.96	0.525917	35.2322	0
LDTLTLLR	1	1	1	A0A0D2Y8U3		0	0	0.01644	59.15	3.86747e-05	2	944.577	-0.569958	50.7	0
NSEVPAEAELLR	1	1	1	A0A0D2XQ76		0	0	0.002038	59.1	0.000125795	2	1327.68	-2.43798	46.4068	0
LGAGGEPIAPLR	1	2	1	A0A0D2XD23		0	0	0.0001681	59.09	4.48234e-05	2	1150.66	5.76804	39.5697	0
IDDTLHELPR	2	2	1	A0A0D2XUU5		0	0	0.001676	59.07	0.000143143	2	1208.62	-5.58028	33.8438	0
ASSYNSISLEGAEK	1	1	1	A0A0D2XVF1		0	0	0.0005045	59.06	0.000182026	2	1455.69	-1.94019	36.3644	0
ELGEAALANYTQNK	1	1	1	A0A0D2XAL2		0	0	0.0001671	59.05	0.000189664	2	1521.75	-2.87413	43.095	0
GDVELNADGTPK	1	1	1	A0A0D2Y973		0	0	0.003769	59.02	0.000143485	2	1215.58	-0.693588	25.3641	0
NQAAANPTNTIYDIK	1	1	1	A0A0D2XQC1		0	0	0.0004219	58.9	0.000203479	2	1633.81	-2.4904	41.1919	0
LSVIETLR	1	1	1	A0A0D2XQ76		0	0	0.01966	58.85	5.74045e-05	2	930.561	-1.07639	46.265	0
SQSYNQETLDK	1	1	1	A0A0D2YH83		0	0	0.0005329	58.82	0.000164287	2	1312.6	1.23092	20.6109	0
NITSVIEPGR	2	2	1	A0A0D2YGK4		0	0	0.00507	58.81	9.81815e-05	2	1085.6	0.352998	38.3757	0
SLScTEEQR	1	1	1	A0A0D2XJN8	C4(Carbamidomethyl)	0	0	0.01426	58.81	9.56168e-05	2	1109.49	-0.459888	12.8367	0
LHFFMVGFAPLTSR	1	3	1	A0A0C4DHT3		0	0	0.0007449	58.81	0.000158156	3	1622.85	-1.22253	52.086	0
QIEGVINAIGR	1	2	1	A0A0J9WKQ6		0	0	0.0002133	58.79	6.80467e-05	2	1169.66	0.298204	46.7051	0
APVQQAIADVR	1	1	1	A0A0D2XGQ0		0	0	0.0003753	58.78	5.87345e-05	2	1167.65	-0.620765	36.5789	0
FAVEPVWYLPGVAER	1	2	1	A0A0J9WH31		0	0	0.0006364	58.78	0.00016839	2	1732.9	-0.840685	52.4125	0
AVSVGVIGYPNVGK	1	1	1	A0A0D2X8J5		0	0	6.517e-05	58.77	9.44441e-05	2	1359.76	-1.46004	47.5543	0
MVTDPTPYNDK	1	1	1	A0A0D2XQN4		0	0	0.0007913	58.76	0.000140496	2	1280.58	-0.834513	26.4298	0
YGEAFEVVPR	1	1	1	A0A0D2XDT4		0	0	0.0005482	58.75	0.000163356	2	1166.58	-0.582623	46.1654	0
YKEEDEAEGK	2	1	1	A0A0D2XA80		0	0	0.01299	58.74	0.000122967	2	1197.53	0.088439	9.06332	1
KFEFTPEGIAK	2	4	1	A0A0D2XN20		0	0	0.008982	58.74	0.000126308	2	1266.67	0.456481	43.441	1
TLHPAVHAGILAR	1	2	1	A0A0D2X961		0	0	0.0001182	58.74	6.41566e-05	4	1355.79	0.254487	29.3455	0
VDVSSASDWQALNK	1	1	1	A0A0D2Y7W8		0	0	0.004924	58.69	0.000191927	2	1519.74	0.184223	45.3212	0
LAHLETAASEFNVTR	1	1	1	A0A0D2XX10		0	0	0.001968	58.69	0.000186789	3	1658.85	0.609374	42.9137	0
VIWccGETLETR	1	1	1	A0A0D2XEA1	C4(Carbamidomethyl); C5(Carbamidomethyl)	0	0	0.0002364	58.67	0.00019485	2	1523.69	-4.25369	46.4602	0
AEVDDGPDVLR	1	3	1	A0A0J9URF5		0	0	0.0131	58.64	0.000134448	2	1185.57	-1.99741	34.5781	0
GGPESLPIFEELFR	1	2	1	A0A0D2Y2H9		0	0	7.422e-05	58.64	0.000192987	2	1590.81	-1.45137	53.4171	0
TGEIVDVPVGPEMLGR	1	2	1	A0A0J9WFZ0		0	0	2.031e-06	58.64	0.000164401	2	1668.86	-0.977785	51.0434	0
VDELKPEFPAVGK	4	1	1	A0A0C4DHS7		0	0	0.001862	58.6	0.000132931	2	1428.77	-0.276099	42.7151	0
ENIEEQILQR	1	3	1	A0A0J9VBI1		0	0	0.003293	58.58	0.000144777	2	1271.66	0.22652	49.4038	0
FETETDTEcIAK	2	1	1	A0A0D2X8I1	C9(Carbamidomethyl)	0	0	0.0005054	58.58	0.000153167	2	1443.63	-0.732154	29.8508	0
LcNAVYIcER	1	4	1	A0A0J9VRH6	C2(Carbamidomethyl); C8(Carbamidomethyl)	0	0	0.0007129	58.55	0.000179014	2	1297.6	-0.916461	35.7889	0
QSGSEmEIDEAK	1	2	1	A0A0D2XUU4	M6(Oxidation)	0	0	0.01619	58.54	0.000126803	2	1339.57	-0.540337	16.2426	0
KGGPGITQSDLLVVNK	1	1	1	A0A0D2YC02		0	0	0.000292	58.54	6.02522e-05	3	1625.92	-0.129842	41.3729	1
SASGDITSPGIK	1	1	1	A0A0D2YC46		0	0	0.0007229	58.53	0.000164831	2	1132.58	-1.38441	25.5082	0
KGESQTNIEITK	2	2	1	A0A0D2XUN7		0	0	0.0181	58.52	0.000151431	3	1347.71	-0.929035	19.274	1
mSGDLPEGWEK	1	4	1	A0A0D2XN20	M1(Oxidation)	0	0	0.0001054	58.49	0.000136553	2	1264.55	-0.246127	37.4525	0
TEEVTEGK	1	1	1	A0A0D2XX10		0	0	0.006082	58.44	8.94401e-05	2	892.426	-0.036363	9.42618	0
LDELGVATR	1	1	1	A0A0D2XHE4		0	0	0.001498	58.44	0.000199719	2	973.531	-0.421057	32.7405	0
LALLVPESK	1	1	1	A0A0D2XH34		0	0	0.003705	58.43	5.15341e-05	2	969.602	3.88909	46.6918	0
APVIKPSPLPAPTTHNPPSR	2	1	1	A0A0D2XUT8		0	0	0.0001482	58.43	5.87115e-05	3	2077.15	-0.35871	30.0245	0
VTLDQVYGGAR	1	1	1	A0A0D2Y4T8		0	0	0.004303	58.42	0.000130643	2	1178.62	0.138677	40.2328	0
ATLEDIAAK	1	1	1	A0A0D2Y5A1		0	0	0.005344	58.39	0.000176026	2	931.507	-2.19796	31.9461	0
LADQNDQWQcVNR	1	2	1	A0A0D2Y1W2	C10(Carbamidomethyl)	0	0	0.0005688	58.33	0.000238186	2	1646.73	-4.58927	32.5694	0
gDAVIEGSNWR	1	1	1	A0A0D2XHH7	N-Term(Acetyl)	0	0	0.001279	58.29	0.000179533	2	1245.58	-1.50478	50.0604	0
IVMQPGVDVEASTTQK	2	1	1	A0A0J9U592		0	0	0.000317	58.28	0.000214123	2	1702.86	-2.58755	38.5609	0
VIATTSSAEK	1	4	1	A0A0J9UEN2		0	0	0.0009614	58.27	0.000116319	2	1006.54	-0.798032	11.969	0
LLIEEYGIK	1	2	1	A0A1D6QVK6		0	0	0.008029	58.27	5.68936e-05	2	1077.62	-0.467167	50.2464	0
EQLTSGQFSGNEGTR	1	1	1	A0A0D2Y4T2		0	0	0.00187	58.26	0.000247953	2	1610.75	3.45806	28.3581	0
TISTLLIGLK	1	1	1	A0A0D2XV91		0	0	0.002624	58.24	5.32388e-06	2	1058.68	-0.775831	51.4494	0
VANFADIFTGR	1	2	1	A0A0J9WG57		0	0	0.001756	58.21	0.000144062	2	1210.63	4.39223	51.6634	0
YTLELEGLK	1	1	1	A0A0D2XUP9		0	0	0.005077	58.19	9.54225e-05	2	1065.58	0.227144	50.2855	0
AGLSLTSmDDQGVR	1	6	1	A0A0J9UPQ3	M8(Oxidation)	0	0	0.001385	58.14	0.000225819	2	1465.69	-2.90016	35.7403	0
EILQSISAQSTDLR	1	1	1	A0A0D2XUH4		0	0	0.0004223	58.14	0.000178629	2	1560.82	-0.181914	48.9996	0
AVIVGDAAcK	1	2	1	A0A0D2XLD2	C9(Carbamidomethyl)	0	0	0.005316	58.1	0.00016735	2	1003.53	1.58252	22.3119	0
VVPGYGHAVLR	2	2	2	A0A0D2XBN2;A0A0D2Y4T8		0	0	0.001184	58.1	5.87776e-05	2	1167.66	-0.291038	29.608	0
AGLYELTSAR	1	2	1	A0A0D2XUR0		0	0	0.001358	58.09	0.000138939	2	1080.57	-0.0317668	42.1042	0
HPWDDITYLLPNLR	1	1	1	A0A0D2XUT9		0	0	0.0003765	58.09	0.000199637	2	1752.91	0.943326	52.37	0
TLGAGTYGVVR	1	3	1	A0A0J9UCF2		0	0	0.009682	58.08	9.72479e-05	2	1093.6	-0.499631	35.447	0
HNEWISPEQER	1	1	1	A0A0D2XLD0		0	0	0.006159	58.07	0.000202196	2	1424.65	-4.40519	28.7493	0
IHGEVQDTDDPDSSQGLPFR	1	2	1	A0A0J9UT46		0	0	0.0003024	58.07	0.000398232	3	2213.01	-2.22362	40.244	0
IcDEIAIIASK	1	1	1	A0A0D2XZ23	C2(Carbamidomethyl)	0	0	0.0002671	58.05	0.000184485	2	1232.65	-0.891374	49.6615	0
TLASDGIAGLYR	1	1	1	A0A0D2XUS2		0	0	0.001032	58.05	0.000170698	2	1236.66	-1.34839	49.8516	0
EQGGQNNAWQR	1	1	1	A0A0D2XPT3		0	0	0.0004044	58.04	0.000184204	2	1287.58	-1.11761	18.3478	0
VNYEHLVVAPGIK	1	1	1	A0A0D2Y128		0	0	0.0003681	58.02	7.28068e-05	3	1438.81	0.424696	44.6439	0
DSVVSGFQWATR	1	2	1	A0A0J9UYI6		0	0	0.000717	57.99	0.000231054	2	1352.66	-0.489625	50.8028	0
YPGTTFIDHLLR	1	1	1	A0A0D2XUT9		0	0	0.0002152	57.98	0.000190826	3	1432.75	-2.64527	51.1992	0
GAVSNDTFK	1	1	1	A0A0D2XUP9		0	0	0.01342	57.95	0.00014333	2	938.457	-0.67172	19.9234	0
SGTLTTSETAHNLK	2	2	1	A0A0J9UYI6		0	0	1.695e-05	57.93	0.000240228	2	1459.74	-0.547127	19.6821	0
AVANETGAFFFLINGPEIMSK	1	5	1	A0A0D2XZD6		0	0	0.0008233	57.93	0.000302882	2	2256.13	-2.71896	53.1927	0
TATAVAHcK	2	1	1	A0A0D2Y5E6	C8(Carbamidomethyl)	0	0	0.004449	57.92	0.000116395	2	958.475	-2.8548	7.10099	0
ATDESYGITQR	1	1	1	A0A0D2XHQ8		0	0	0.0008709	57.92	0.00020236	2	1240.58	-1.84487	24.916	0
DKNEEETSTVSVSEATTR	2	1	1	A0A0D2XGW2		0	0	0.009203	57.92	0.000356612	2	1982.92	0.237818	25.5927	1
SSTSIEEAELER	1	3	1	A0A0J9UZN4		0	0	0.001645	57.91	0.000199995	2	1350.63	-3.10108	33.7816	0
YTVTLIPGDGIGTEVAESVK	1	1	1	A0A0D2XXN9		0	0	1.678e-06	57.91	0.000207519	2	2049.08	0.535936	51.2966	0
ANVVDIGGNIGHScVK	1	1	1	A0A0D2XLD1	C14(Carbamidomethyl)	0	0	9.715e-06	57.9	0.000239217	3	1639.82	-0.501326	36.4089	0
ESVIEAHK	1	1	1	A0A0D2XMV9		0	0	0.005793	57.89	7.45314e-05	2	912.479	0.269666	12.6539	0
VSALEIASMYFK	1	1	1	A0A0D2XN06		0	0	0.0004061	57.89	0.000222375	2	1358.7	-4.18516	52.599	0
IIENSEGAR	1	1	1	A0A0D2XX39		0	0	0.01669	57.88	0.00018908	2	988.506	-0.252403	12.7211	0
LEEPESScR	1	2	1	A0A0J9UT46	C8(Carbamidomethyl)	0	0	0.001991	57.83	0.000136715	2	1106.48	0.886004	15.7631	0
VTLEELYR	1	4	1	A0A0J9WR11		0	0	0.01119	57.81	0.000111516	2	1022.55	0.917902	48.8656	0
LVQEAVQAIR	1	1	1	A0A0D2XZI9		0	0	0.001258	57.79	6.61207e-05	2	1126.66	0.274639	36.7511	0
TPAcNIASWGSK	1	1	1	A0A0D2X877	C4(Carbamidomethyl)	0	0	0.0004756	57.71	0.00019451	2	1291.61	-2.53037	38.0313	0
LITDYFNGK	1	1	1	A0A0D2XA80		0	0	0.007488	57.65	0.000118793	2	1070.55	1.44687	49.2063	0
TTIEYLIK	1	1	1	A0A0D2XEN9		0	0	0.01237	57.64	4.94176e-05	2	980.566	-0.653611	47.6553	0
FSVSPVVQR	1	2	1	A0A0J9UYI6		0	0	0.007639	57.64	0.000124233	2	1018.57	0.34919	36.8621	0
LcGWLDSQLGSPAGPR	1	1	1	A0A0D2YG01	C2(Carbamidomethyl)	0	0	0.0002982	57.64	0.000301585	2	1713.83	-1.91678	50.755	0
DLSEANTLAPNDSAITR	1	1	1	A0A0D2XM73		0	0	0.001605	57.64	0.000309248	2	1787.88	-0.454728	42.9971	0
VDDSSASIGK	1	2	1	A0A0D2XD82		0	0	0.001581	57.61	0.000139918	2	978.473	-0.579576	14.5444	0
LSQTLQAYLTEPAAR	1	2	1	A0A1D6QVK6		0	0	0.00034	57.61	0.000203635	2	1661.88	-1.97211	50.3463	0
IEEVDDDEEEK	3	2	1	A0A0D2XK76		0	0	0.0003994	57.56	0.000162848	2	1349.56	-0.920578	19.1372	0
NVAIALDTK	1	2	1	A0A0D2YGK4		0	0	0.01025	57.51	0.000188596	2	944.541	-0.502135	34.3763	0
YLTcSAIFR	1	4	2	A0A0C4DHT3;A0A0C4DHQ2	C4(Carbamidomethyl)	0	0	0.003249	57.47	0.000191237	2	1130.57	-0.750079	48.4814	0
VVEEEHVR	1	2	1	A0A0D2XUS8		0	0	0.02526	57.44	0.000160288	3	996.509	-2.20734	10.8948	0
AFAVDVAEK	1	2	1	A0A1D6QVK6		0	0	0.008183	57.43	0.000152254	2	949.499	-0.0340538	35.1658	0
VVDLLAPYAR	1	1	1	A0A0D2YC97		0	0	0.001045	57.43	0.000119906	2	1116.64	-0.710024	50.7748	0
ITSVSADSPGFLANR	1	1	1	A0A0D2XDN1		0	0	0.001528	57.43	0.000260052	2	1534.78	-2.07638	44.3997	0
HETGSIDSFSWGVANR	1	3	1	A0A0D2XMK5		0	0	0.0003421	57.43	0.000331436	3	1762.81	-1.68809	48.449	0
VNLIPVIAK	1	3	2	A0A0D2XQY3;A0A0D2XCA9		0	0	0.006725	57.4	7.36979e-06	2	966.633	-1.6315	50.5684	0
LGDEYEITER	1	1	1	A0A0D2YBI2		0	0	0.003573	57.4	0.000205808	2	1224.57	-3.73319	34.9266	0
DSTQIEINPLSETSDHK	2	4	1	A0A0J9VRH6		0	0	2.411e-05	57.4	0.00039997	2	1913.9	-2.62666	43.6888	0
TIGTSFVNLAADYFLK	1	1	1	A0A0D2X809		0	0	0.01818	57.37	0.000229223	2	1759.92	-3.202	53.3898	0
SNVLSQTDGLFR	1	1	1	A0A0D2Y4W9		0	0	0.0041	57.36	0.000246463	2	1336.69	0.717996	50.4717	0
TLDLDQTQLGDR	1	2	1	A0A0D2XUU5		0	0	0.002353	57.36	0.000248484	2	1374.69	-0.658411	41.4792	0
LVPNIPFQMLLR	1	3	1	A0A0J9WHE4		0	0	0.0003579	57.36	7.51144e-05	2	1440.84	-0.412568	52.7454	0
GQSVEPIDLLEK	2	1	1	A0A0D2Y8Z1		0	0	0.001636	57.33	0.000179564	2	1327.71	-1.42923	50.6794	0
TFSYAGFEQQPK	1	1	1	A0A0D2XVP6		0	0	0.0007731	57.32	0.000259031	2	1402.66	-0.998234	44.5445	0
AGITTILNAR	1	2	1	A0A0J9UEK6		0	0	0.0111	57.31	0.000120943	2	1029.6	-0.257674	48.5483	0
EAVQANVSER	1	2	1	A0A0D2Y1N9		0	0	0.01574	57.31	0.000182065	2	1102.55	0.307074	16.4049	0
LHLDHcQAELSTLSK	2	1	1	A0A0D2XZ51	C6(Carbamidomethyl)	0	0	0.0001075	57.3	0.00032	2	1751.88	2.65012	35.0993	0
LSSQLLLGVVR	1	3	1	A0A0D2YHQ4		0	0	0.003323	57.29	2.48228e-05	2	1184.74	-0.874693	51.0861	0
AYGNQAVVVSVDPK	1	1	1	A0A0D2XN06		0	0	0.00287	57.29	0.000219673	2	1446.76	1.81014	36.785	0
TVLITGATAGIGR	1	2	1	A0A0J9W1U0		0	0	0.002267	57.28	7.35178e-05	2	1229.72	-0.232927	43.5329	0
ILTSFINPR	1	1	1	A0A0D2XQE8		0	0	0.003466	57.27	8.10935e-05	2	1060.62	2.33632	49.2715	0
ATAGDTHLGGQDFDTNLLDHcK	2	1	1	A0A0D2XAH7	C21(Carbamidomethyl)	0	0	8.009e-05	57.26	0.000534196	4	2386.07	-0.31476	44.0181	0
EEAINALVR	1	1	1	A0A0D2Y2S2		0	0	0.005005	57.23	0.00015082	2	1014.56	1.52136	39.8792	0
STQGIYPLQNVHIR	2	1	1	A0A0D2XBZ0		0	0	0.001561	57.2	0.000135764	2	1625.89	7.533	46.8791	0
FDDLWSLFR	1	1	1	A0A0D2Y0L8		0	0	0.003337	57.18	0.000184917	2	1198.59	0.38037	53.1538	0
GDVQPDAEDIGLPESSAR	1	2	1	A0A0D2Y050		0	0	0.0002224	57.14	0.000398372	2	1855.87	3.12358	42.7853	0
VIVAGTSAYSR	1	1	1	A0A0D2XHS3		0	0	0.003601	57.12	0.000135959	2	1123.61	0.979551	27.8864	0
GVPDEAEVESLSK	1	2	1	A0A0D2XZP5		0	0	0.001083	57.12	0.000243484	2	1359.67	0.968938	41.7742	0
AGEYIFSR	1	1	1	A0A0D2X9K1		0	0	0.007565	57.11	0.000104271	2	942.467	-0.95779	39.5201	0
ILVANTSMDTDK	1	1	1	A0A0D2XXX3		0	0	0.0004462	57.09	0.000252794	2	1307.65	-1.338	32.6368	0
GVDSTSSLTFPQK	1	1	1	A0A0D2XE22		0	0	0.0003822	57.08	0.000271496	2	1366.69	2.71088	38.3274	0
KVVEYSVAK	1	1	1	A0A0D2Y939		0	0	0.009614	57.06	5.43137e-05	2	1022.59	0.606677	17.7725	1
ADGESGGFSK	1	3	1	A0A0J9WI68		0	0	0.001552	57.05	0.00015375	2	954.417	1.02016	12.8226	0
YLAEFASGEK	1	2	1	A0A0J9U6T0		0	0	0.002402	57.05	0.000169332	2	1114.54	-0.88499	36.9453	0
EGGAPGEFAPQFR	3	1	1	A0A0D2XVK7		0	0	0.001513	57.03	0.000251654	2	1362.64	-1.73654	44.4779	0
DLSHLAVNFTVPK	2	1	1	A0A0J9U592		0	0	3.496e-05	57.03	0.000155253	2	1440.78	-1.36102	50.7261	0
IVSDNYTYcK	1	1	1	A0A0D2Y9B3	C9(Carbamidomethyl)	0	0	0.00116	57.01	0.000228728	2	1262.57	-0.768835	26.6176	0
ALADPSILRPK	2	1	1	A0A0D2YHA1		0	0	0.0009746	57	3.70121e-05	2	1180.7	-2.91156	36.9723	0
ELVAAGKPEVK	1	1	1	A0A0D2XLD0		0	0	0.01154	56.99	7.2295e-05	2	1140.66	-1.57912	20.2932	0
HVSPAGAAIGLPLTEDEKK	1	2	1	A0A0D2X961		0	0	5.847e-06	56.99	0.000184687	3	1933.04	-1.47661	39.5998	1
GYTFSTTAER	3	3	1	A0A2C8D194		0	0	0.00324	56.98	0.000211572	2	1132.53	-1.02149	30.8217	0
SHLAPQLSPATQDLLR	1	2	1	A0A0J9UTG8		0	0	0.0005267	56.95	0.000167323	3	1746.95	-0.547036	47.4914	0
GYFVGHVLDSLFR	1	1	1	A0A0J9VCC4		0	0	0.001401	56.93	0.00024464	3	1509.78	-1.9912	52.2375	0
SAASRPEAQALLDELHAQGVQAK	1	2	1	A0A1D6QVK6		0	0	5.677e-07	56.92	0.000263495	4	2390.25	1.20434	49.5939	0
ALEDNQISDDTR	1	2	1	A0A0D2XEF0		0	0	0.000147	56.91	0.000277038	2	1376.63	0.311456	26.2492	0
KEETNIEVR	1	1	1	A0A0D2XQA6		0	0	0.007363	56.9	0.000243171	2	1117.59	0.704723	15.4682	1
EAHPDILTTAK	1	1	1	A0A0D2Y4D0		0	0	0.00215	56.9	0.000210707	2	1195.63	-0.935462	25.0903	0
IYQNLGADYDER	1	1	1	A0A0D2XMC1		0	0	0.002257	56.88	0.000302341	2	1456.67	-3.4397	35.7143	0
LASAVIGcGK	1	2	1	A0A0D2XNM2	C8(Carbamidomethyl)	0	0	0.0009179	56.86	0.0002243	2	975.53	0.612442	25.321	0
SmPAPSIPEVR	1	4	1	A0A0C4DHU4	M2(Oxidation)	0	0	0.003621	56.83	0.000194938	2	1199.61	0.592225	35.5055	0
LVGFVLGLK	1	1	1	A0A0D2XDK3		0	0	0.003238	56.81	5.83657e-06	2	945.614	0.75919	51.6777	0
FGDVTSSSLAR	1	1	1	A0A0D2XH20		0	0	0.000378	56.78	0.000224272	2	1139.57	-0.251012	33.5465	0
FDMSEFQEK	2	1	1	A0A0D2X918		0	0	0.005677	56.73	0.000165507	2	1160.49	-0.793062	47.1855	0
EISHAYEILSDSQK	1	1	1	A0A0D2XDM0		0	0	1.176e-05	56.7	0.00034774	2	1619.79	-0.380517	39.6025	0
QKADEAYVIGK	1	2	1	A0A0J9WHE4		0	0	0.0135	56.69	0.000224468	2	1221.64	-2.43485	23.163	1
HVDEcLGSAQFFGNR	2	1	1	A0A0D2XJU4	C5(Carbamidomethyl)	0	0	0.000279	56.69	0.00036997	3	1736.78	-1.17487	44.3942	0
ALEEGLSPADLcAK	1	1	1	A0A0D2XGY9	C12(Carbamidomethyl)	0	0	0.00456	56.68	0.000315946	2	1473.72	-5.18028	46.2792	0
LAVNMIPFPR	1	2	1	A0A0C4DHQ2		0	0	0.003368	56.66	0.000222463	2	1157.65	-0.281172	51.3463	0
SVNEPVQTGLK	1	2	1	A0A0J9WFZ0		0	0	0.01328	56.66	0.0001833	2	1171.63	-0.954624	26.4655	0
NGHFGTNQSFSWEQPK	2	2	1	A0A0D2X9R5		0	0	0.02232	56.65	0.000451792	2	1863.83	-5.93923	40.9051	0
SNSTIEDVcDR	1	1	1	A0A0D2XV77	C9(Carbamidomethyl)	0	0	0.0006314	56.63	0.000193044	2	1295.55	-0.380784	25.6233	0
YTATGTGPALLSNR	1	2	1	A0A1D6QVK6		0	0	0.005463	56.59	0.000279363	2	1421.74	-2.34808	38.0601	0
YGETGWDHR	1	1	1	A0A0D2XEN9		0	0	0.001649	56.58	0.000186379	2	1120.48	-0.474049	23.0896	0
VGHDNLVGEVIR	1	3	1	A0A0D2XD29		0	0	0.001399	56.58	0.000206929	2	1307.71	0.389704	39.5725	0
QSSNTSINDYGSFR	1	6	1	A0A0D2X9L7		0	0	0.0009866	56.55	0.000365825	2	1575.7	-1.946	36.5855	0
AFLEEVAETGAHDGR	1	2	1	A0A0D2Y1W2		0	0	1.755e-05	56.52	0.000369809	3	1601.76	1.72473	44.5499	0
YVVLDEADR	1	2	1	A0A0D2XDY5		0	0	0.02304	56.51	0.000227266	2	1079.54	1.67712	35.2062	0
VQQLIEDFFNK	1	1	1	A0A0D2XQC1		0	0	0.001973	56.51	0.000292933	2	1380.72	-0.518435	51.6921	0
RIcDEIAIIASK	1	1	1	A0A0D2XZ23	C3(Carbamidomethyl)	0	0	0.01196	56.48	0.000210062	3	1388.76	0.68243	49.2552	1
LAQEIcEGGPIGVR	1	2	1	A0A0D2XUY6	C6(Carbamidomethyl)	0	0	0.00124	56.47	0.00026972	2	1498.77	0.673491	40.7015	0
AGEEDDEPETEDAAK	1	2	1	A0A0J9WH36		0	0	0.0005204	56.47	0.000231172	2	1605.64	0.531482	16.0121	0
ILNcEVLVR	1	1	1	A0A0D2XV77	C4(Carbamidomethyl)	0	0	0.003015	56.46	0.000244923	2	1115.62	-1.09616	42.388	0
ALImTAEASAR	2	3	1	A0A0C4DHU4	M4(Oxidation)	0	0	0.004116	56.44	0.000251955	2	1149.6	3.18818	30.2424	0
VNETSAGR	1	1	1	A0A0D2X990		0	0	0.0125	56.43	0.000159598	2	833.41	-1.79471	8.41582	0
IPSPSSTPPPSDK	1	1	1	A0A0D2XC01		0	0	0.0002996	56.43	0.0002969	2	1309.66	0.759744	21.0472	0
TPVGEHPWSVIYGR	2	1	1	A0A0D2XMV9		0	0	3.7e-05	56.41	0.000294385	2	1597.81	-0.171518	49.4824	0
TGGcTEDcSYcAQSTR	1	1	1	A0A0D2XBB4	C4(Carbamidomethyl); C8(Carbamidomethyl); C11(Carbamidomethyl)	0	0	0.002988	56.36	0.000184156	2	1852.69	1.03663	17.9764	0
GAVNEDHPNYGGVFAGDGSHPAR	4	4	1	A0A0C4DHU4		0	0	8.794e-08	56.35	0.00063288	3	2324.04	-1.27	32.5864	0
TTYAASSQIR	1	1	1	A0A0D2XBZ0		0	0	0.003091	56.34	0.00017676	2	1097.56	-1.17782	20.6691	0
ELPALFDFTR	1	1	1	A0A0D2XCF2		0	0	0.004436	56.34	0.00024621	2	1208.63	-0.329685	52.336	0
NLFHPELLISGK	2	1	1	A0A0D2X9U0		0	0	0.0001894	56.33	0.00010814	2	1367.77	0.814032	50.5931	0
HIGPGVYDIHSPR	3	1	1	A0A0D2Y8Z1		0	0	0.0001733	56.31	0.000299488	2	1447.75	3.25028	30.2139	0
ASLGDVKEEDENQGSSSK	1	1	1	A0A0D2X8Q7		0	0	0.0001561	56.26	0.000498499	3	1879.85	-0.359071	18.9188	1
VGSGTPSGGPR	1	1	1	A0A0D2XEI6		0	0	0.008066	56.25	0.000155206	2	971.49	-0.643895	10.2654	0
GGSMGDAGGASDR	1	5	1	A0A0D2XZD6		0	0	0.0007665	56.25	0.000137303	2	1137.46	-0.947691	10.8154	0
cGVLGATGSVGQR	1	2	1	A0A0D2XHA3	C1(Carbamidomethyl)	0	0	0.003988	56.24	0.000276189	2	1261.63	-0.719962	29.9592	0
NALSDVPESR	1	2	1	A0A1D6QVK6		0	0	0.006431	56.22	0.00025072	2	1087.54	0.119689	27.6509	0
NGASQADLESLPK	1	3	1	A0A0J9V605		0	0	0.0002023	56.21	0.000296173	2	1329.66	-0.974452	35.3352	0
IQEELAAAK	1	2	1	A0A0D2Y575		0	0	0.001748	56.18	0.000252438	2	972.537	1.09577	22.6154	0
IFVLDEcDK	2	4	1	A0A0D2XGU4	C7(Carbamidomethyl)	0	0	0.006963	56.18	0.00029437	2	1138.54	-0.729281	45.3961	0
EIAEINRPNTK	1	1	1	A0A0J9V104		0	0	0.006072	56.18	0.000193997	2	1284.7	4.29151	19.8465	0
DQTHSVQGVLAR	2	1	1	A0A0D2XJN8		0	0	0.01779	56.07	0.000245195	2	1310.68	2.7075	27.7055	0
KLIDESDLDLEK	2	1	1	A0A0D2X8I1		0	0	0.000142	56.07	0.000292158	2	1417.74	-1.39757	42.5513	1
YDYEDVDSEGANK	1	1	1	A0A0J9WGD0		0	0	1.953e-05	56.07	0.000218871	2	1504.61	0.566703	29.7901	0
LDIANkTVTLGGLR	1	2	1	A0A0D2X8I1	K6(GlyGly)	0	0	0.005948	56.06	0.000132047	3	1584.9	-1.59459	48.5008	1
QLNINDLER	1	1	1	A0A0D2XK42		0	0	0.002352	56.04	0.000218895	2	1114.59	0.520066	42.9859	0
TIAYIGQNDLR	1	1	1	A0A0D2YG01		0	0	0.0118	56.04	0.000274272	2	1263.67	-0.856935	42.3191	0
TAQSANWSDAK	1	1	1	A0A0D2XDA6		0	0	0.0003427	56.02	0.000247284	2	1178.55	2.43103	19.8645	0
SLVESGGDWDR	1	2	1	A0A0D2XH43		0	0	0.003396	56.02	0.000261286	2	1220.55	-2.42036	38.0205	0
ENTEGEYSGLEHQSVDGVVESLK	2	1	1	A0A0D2XXN9		0	0	2.017e-06	56.02	0.000726975	3	2506.16	-0.790156	49.9733	0
TLGEGSIWTR	1	1	1	A0A0D2YG01		0	0	0.0008038	55.99	0.000292428	2	1119.58	-1.16184	45.3658	0
VATTEQAQEVHK	2	1	1	A0A0D2XEA1		0	0	0.0003387	55.99	0.000274804	2	1340.68	0.597243	11.1924	0
VEGVLTTGLIGNGSQDASDK	1	2	1	A0A1D6QVK6		0	0	0.0007635	55.99	0.000429138	2	1960.98	0.339858	48.9326	0
ITTLGHVQR	2	1	1	A0A0D2XQA8		0	0	0.0007972	55.96	5.89417e-05	3	1024.59	0.30379	18.8555	0
AQASYAPSATEPK	1	2	1	A0A0J9WKQ6		0	0	0.0001207	55.96	0.000311187	2	1320.64	-1.26172	21.0197	0
QAYDGYEASK	1	1	1	A0A0D2XAF6		0	0	0.002049	55.94	0.000229851	2	1131.49	-1.10928	20.2521	0
SSPFGGSSHAK	2	1	1	A0A0D2Y8P1		0	0	0.002176	55.93	0.000218511	2	1061.5	0.396742	11.9798	0
ILVDLAQQQDK	1	1	1	A0A0D2XWU0		0	0	0.0002884	55.92	0.000214282	2	1270.7	0.705204	40.0514	0
INFLALFSK	1	1	1	A0A0D2YK35		0	0	0.007189	55.91	6.5779e-05	2	1052.62	1.15769	52.9292	0
AAAELVQQLK	1	1	1	A0A0D2XAY6		0	0	0.0008164	55.91	0.000152074	2	1070.62	0.265115	38.1796	0
ESYNVFLAELGPEDK	1	3	1	A0A0J9VBI1		0	0	0.0002825	55.89	0.000481257	2	1710.82	-3.49049	51.6021	0
HSATLTGGSK	1	1	1	A0A0D2Y8Q2		0	0	0.0007658	55.87	0.000194763	2	958.496	0.907723	8.48736	0
FLGFEQIFK	1	2	1	A0A0J9UEA1		0	0	0.003979	55.82	0.00023328	2	1128.61	-0.0434631	52.4468	0
IFDSHAGIAHTR	3	1	1	A0A0D2X8I1		0	0	0.0002541	55.82	0.000324524	2	1324.67	-0.648471	21.2058	0
YADAATEGPSQDLIQGK	1	1	1	A0A0D2Y0L8		0	0	0.000278	55.82	0.000470618	2	1763.84	-0.794845	37.8634	0
ASPAVQIPEDKYDALVNR	1	6	1	A0A0J9VGT0		0	0	3.478e-05	55.82	0.000374007	3	1986.03	-0.226897	46.9106	1
IAFTGSTVIGR	1	1	1	A0A0D2XAL2		0	0	0.0003779	55.81	0.000119271	2	1121.63	1.52718	44.3472	0
DTcPHIIVGTPGR	2	4	1	A0A0D2XGU4	C3(Carbamidomethyl)	0	0	0.001555	55.8	0.00039362	2	1422.71	-2.23602	32.3456	0
ScQVEDEQVIGVR	2	7	1	A0A0J9UPQ3	C2(Carbamidomethyl)	0	0	6.618e-05	55.79	0.000421813	2	1518.72	-1.78674	35.7564	0
LFGNTAIEQISR	1	1	1	A0A0D2XN06		0	0	9.956e-05	55.76	0.000264531	2	1348.72	-2.10384	49.8567	0
AGIKPEDVDEVFFGNVLSAGVGQGPAR	1	1	1	A0A0D2XPN3		0	0	3.22e-07	55.76	0.000485926	3	2729.39	0.275009	52.0012	0
DSPVYPAIYDSNR	1	1	1	A0A0D2XZN6		0	0	0.001716	55.72	0.000398124	2	1496.7	-3.78891	43.6968	0
RGPLVIYDPETDGK	1	2	1	A0A0D2XCJ2		0	0	0.0008353	55.71	0.000339965	3	1559.81	-0.0260694	41.3756	1
ISTSSATGQYR	1	1	1	A0A0D2XGL4		0	0	0.0005545	55.64	0.000273171	2	1170.58	0.649161	19.7283	0
LNSIAEAYR	1	1	1	A0A0D2XUH4		0	0	0.009486	55.63	0.000244396	2	1036.54	0.531486	32.2385	0
QNNWEEGNYINYK	1	1	1	A0A0D2XIG0		0	0	0.002197	55.63	0.000412479	2	1671.74	-1.39791	44.4061	0
IITGDVNNPEDVK	1	1	1	A0A0D2XUI8		0	0	0.01184	55.62	0.000320079	2	1413.73	3.21052	31.1519	0
AFNQFILDPIFK	1	1	1	A0A0D2XQM8		0	0	0.0003048	55.61	0.000191528	2	1452.79	-1.77105	52.509	0
LGITFVEQNIR	1	2	1	A0A0D2X961		0	0	0.0007252	55.58	0.00018663	2	1289.72	-0.971527	50.7236	0
LTQLLDLAEDETEK	1	1	1	A0A0D2XQ76		0	0	6.585e-05	55.57	0.000410867	2	1617.82	0.738242	50.9416	0
DAVAAGDKDEAR	1	1	1	A0A0D2Y5X7		0	0	0.009612	55.55	0.000306752	2	1217.58	1.38708	9.214	1
LDDTIHSALR	2	2	1	A0A0D2Y2H9		0	0	0.001506	55.54	0.000193244	2	1140.6	0.700331	28.8797	0
SKPSVAGIIYTFGGQFVSK	1	1	1	A0A0D2XUT9		0	0	0.0001216	55.48	0.000237837	3	1986.07	1.466	51.9899	0
YKPGTVALR	1	1	1	A0A0C4DHX6		0	0	0.01304	55.47	0.000100604	3	1004.59	-1.4298	22.7648	0
KSDVDDIVLVGGSTR	1	1	1	A0A0D2XQC1		0	0	0.001513	55.47	0.000337287	2	1560.82	-2.46279	41.0076	1
EHALLAYTLGVK	2	3	1	A0A2C8D0A4		0	0	0.003209	55.44	0.000232608	3	1314.74	-0.641538	49.4396	0
GGLATLTSAGQVDR	1	3	1	A0A0J9UNY5		0	0	0.0017	55.44	0.000361628	2	1345.7	-4.81695	40.1085	0
ILEcPTTPNGVDWNGR	1	1	1	A0A0D2XUU9	C4(Carbamidomethyl)	0	0	0.001049	55.41	0.00060411	2	1828.87	0.159953	46.0014	0
IQIYYTGVcHTDAYTLSGK	1	2	1	A0A0D2XMM8	C9(Carbamidomethyl)	0	0	0.002148	55.4	0.00069361	2	2190.05	-1.05393	48.3956	0
DEQEYIVIR	1	1	1	A0A0D2X920		0	0	0.01337	55.39	0.000298896	2	1164.59	-1.40228	44.4102	0
IVLAPAEGTK	1	1	1	A0A0J9UC03		0	0	0.01715	55.38	0.00012531	2	998.588	-0.193349	29.333	0
QAVVNPENTLFATK	1	1	1	A0A0D2XX39		0	0	0.0001327	55.29	0.000331297	2	1531.81	-0.624637	49.5951	0
LLDETWGHEGYLR	2	1	1	A0A0D2X891		0	0	0.005866	55.23	0.000519005	2	1588.77	-5.94958	48.6819	0
FEGGALGIFR	1	2	1	A0A0J9UTM6		0	0	0.004307	55.21	0.000260022	2	1066.57	-1.2876	51.1097	0
VDADTVPK	1	1	1	A0A0D2Y5A1		0	0	0.01793	55.2	0.000240388	2	844.442	0.466088	16.7982	0
NAEELSSYQK	1	1	1	A0A0D2XVF0		0	0	0.003187	55.2	0.000368434	2	1168.55	-1.00013	22.9899	0
GSSTGAGLGNAFLSHIR	1	1	1	A0A0D2Y1Y9		0	0	0.0002363	55.19	0.000449497	3	1644.84	-1.19427	50.1368	0
GTLLmDTTWR	1	3	1	A0A0J9WHE4	M5(Oxidation)	0	0	0.002579	55.16	0.000392874	2	1209.59	-0.392912	49.5715	0
AGGSADIFQVPETLPEDVLAK	1	1	1	A0A0D2Y4V8		0	0	2.09e-06	55.14	0.000454395	2	2157.11	0.659687	52.0476	0
EALNSLSSILK	1	1	1	A0A0D2Y9E9		0	0	0.001366	55.13	0.000185829	2	1174.67	-0.465981	50.9001	0
NVAAGcNPmDLR	1	1	1	A0A0D2XVI4	C6(Carbamidomethyl); M9(Oxidation)	0	0	0.01353	55.13	0.00038194	2	1333.6	-1.74502	25.2329	0
mAALDFVEALVK	1	1	1	A0A2C8CXF1	M1(Oxidation)	0	0	9.72e-05	55.08	0.000302074	2	1322.7	-0.16496	52.5061	0
EFVQQAISFSQK	1	2	1	A0A0D2YBW7		0	0	0.0002786	55.07	0.000370294	2	1411.72	-1.85558	49.544	0
ATEAYWGGK	1	1	1	A0A0D2Y8Z1		0	0	0.007489	55.03	0.000370109	2	982.463	0.586526	29.0807	0
ATGGPVSTEEIR	1	1	1	A0A0D2Y8P5		0	0	0.0004555	55.01	0.000391221	2	1216.62	-0.80467	26.3444	0
VVQWLDDNQQATR	2	1	1	A0A0D2XA80		0	0	0.0002521	54.99	0.00049366	2	1572.77	-1.95591	42.6906	0
VVSSAIVDK	1	2	1	A0A0D2X8I2		0	0	0.003612	54.98	0.000225558	2	917.531	0.320291	22.3107	0
TVAGGAYTVATPAAAAMR	1	1	1	A0A0D2XDT8		0	0	0.00101	54.98	0.000493527	2	1678.86	0.43066	42.9873	0
LEESAIER	1	2	1	A0A0J9WGI7		0	0	0.01653	54.94	0.000365034	2	946.485	0.714723	22.0635	0
TGEGGGQVVR	1	2	1	A0A0J9WN67		0	0	0.0009676	54.94	0.000304596	2	959.489	-1.16084	11.3207	0
VVFIEHDLR	2	1	1	A0A0D2XIF6		0	0	0.004084	54.9	0.000198687	2	1127.62	-2.20604	38.2621	0
NDGEYADEDPDIFQTSK	1	1	1	A0A0D2Y2Q9		0	0	0.007054	54.9	0.000575997	2	1943.81	0.0912399	46.7122	0
AAIIIAK	1	1	1	A0A0D2Y4M4		0	0	0.02327	54.89	7.31386e-05	2	699.476	-1.06903	27.5605	0
VPEDVNNPETR	2	1	1	A0A0D2Y1Z2		0	0	0.0002267	54.88	0.000398557	2	1269.61	1.11431	19.0593	0
EDLAALEK	1	2	1	A0A0D2X9U0		0	0	0.01454	54.85	0.000333069	2	888.468	0.471262	31.5291	0
AVLIAGPPSTGK	1	1	1	A0A0D2XVJ7		0	0	0.0005297	54.85	9.52561e-05	2	1110.65	-2.76601	34.1238	0
LGSPFEEATVQGPQVSK	1	1	1	A0A0D2XK33		0	0	0.001981	54.84	0.000510516	2	1773.9	1.68637	46.1381	0
SLNLFSVSDAK	1	2	1	A0A0J9WNS0		0	0	0.002956	54.82	0.00036768	2	1180.62	-1.53745	50.6662	0
VSAELIER	1	1	1	A0A0D2XZH0		0	0	0.006721	54.79	0.000423331	2	916.511	1.20194	30.5566	0
DAGSIAGLNVLR	1	1	1	A0A0D2XAH7		0	0	0.0003564	54.78	0.000275775	2	1185.66	-1.08384	50.6172	0
aDEYDAEQAAELK	1	1	1	A0A0D2X9U6	N-Term(Acetyl)	0	0	0.0003618	54.76	0.000426767	2	1494.66	-0.935094	44.8833	0
cAQTDTSAAPR	1	1	1	A0A0D2XWQ5	C1(Carbamidomethyl)	0	0	0.002732	54.74	0.000298639	2	1177.53	-0.420079	10.0818	0
YLVLDEADR	1	1	1	A0A0D2XDN9		0	0	0.003415	54.72	0.000324808	2	1093.55	0.404868	41.8357	0
SGGQLTFTSPK	1	6	1	A0A0D2X9L7		0	0	0.001272	54.68	0.000322537	2	1122.58	-0.855862	32.8873	0
YSLNLAHEAK	2	3	1	A0A0D2XV18		0	0	0.001261	54.68	0.000364237	2	1145.6	1.63064	30.534	0
GTFGQVYQVR	1	6	1	A0A0D2X9L7		0	0	0.004184	54.66	0.000304362	2	1154.59	-0.473879	38.901	0
DLAGFHLTAR	2	3	1	A0A0J9V792		0	0	0.002735	54.62	0.000281637	2	1100.58	-1.7809	45.0524	0
APETKPEVPAETADEAAK	1	4	1	A0A0J9UFI4		0	0	0.0001113	54.61	0.000622864	3	1853.91	0.194089	23.3986	0
VVGTVAVGR	1	1	1	A0A0D2XV33		0	0	0.0103	54.59	0.000256308	2	857.522	1.98244	22.1168	0
EDLAALER	1	1	1	A0A0D2XAP0		0	0	0.01258	54.59	0.000394106	2	916.471	-2.45757	34.0928	0
VSSVNEIGDISK	1	1	1	A0A0D2XHE4		0	0	6.971e-05	54.51	0.000378777	2	1247.65	1.11107	35.0101	0
SVELAEAADPESQSLSK	1	1	1	A0A0D2Y7G0		0	0	0.001745	54.51	0.000672949	2	1760.86	0.0435967	40.1807	0
KDANAAFYGER	1	1	1	A0A0D2Y402		0	0	0.01423	54.5	0.000403955	2	1241.59	0.89185	22.1518	1
IDDLVAK	1	1	1	A0A0D2XW50		0	0	0.01684	54.47	0.000528228	2	773.44	-0.677965	25.0818	0
KGEYETGFER	2	4	1	A0A0J9UMY7		0	0	0.005708	54.45	0.000407017	2	1215.56	-2.27418	22.8163	1
GSYVGIHSTGFR	3	2	1	A0A0D2XGU4		0	0	0.003134	54.44	0.000447528	2	1280.64	-2.3987	31.833	0
VMYLEDDDIAHIHEGSLNIHR	2	2	1	A0A0D2X8I1		0	0	8.283e-05	54.44	0.000957473	3	2477.2	3.11219	48.7935	0
LDLVTEQPDKR	2	1	1	A0A0D2XAU5		0	0	0.0006396	54.43	0.000333355	3	1313.71	-0.22735	29.4036	1
ASFIDSEELcQR	1	1	1	A0A0D2XUL7	C10(Carbamidomethyl)	0	0	0.000343	54.43	0.000481733	2	1454.66	-0.473698	44.2972	0
GISELGIYPAVDPLDSK	1	1	1	A0A0D2YC97		0	0	1.666e-06	54.43	0.000455771	2	1773.93	0.239279	51.4357	0
IILTPLAPGNQR	1	1	1	A0A0D2Y2Q9		0	0	0.01389	54.42	5.67413e-05	2	1292.77	-0.912552	47.7176	0
DSINQDDFNK	1	2	1	A0A0D2X8I2		0	0	0.004119	54.38	0.000271012	2	1195.52	-1.52381	26.1384	0
GEITAEEYDR	2	1	1	A0A0D2Y8Z1		0	0	0.002765	54.36	0.000328511	2	1182.53	-1.53147	26.6229	0
LNASFNcVDR	1	2	1	A0A0J9WQG8	C7(Carbamidomethyl)	0	0	0.00143	54.36	0.000370285	2	1195.55	-0.670786	33.4144	0
HEIEAGWDGK	1	1	1	A0A0D2XLN7		0	0	0.005303	54.34	0.000405126	2	1141.53	0.1683	24.965	0
KPAVVAVETK	2	2	1	A0A0D2XCL5		0	0	0.002346	54.29	0.000159756	2	1041.63	0.669857	15.5587	0
TGSSITEGIGQGR	1	1	1	A0A0D2XDZ7		0	0	0.004237	54.29	0.000466793	2	1262.63	-3.85829	27.9446	0
QFANTNDTTR	1	2	1	A0A0J9ULS2		0	0	0.001292	54.23	0.000400793	2	1167.54	-1.31061	15.0551	0
KAINQALEAEK	1	2	1	A0A0D2XCK5		0	0	0.000846	54.22	0.000356871	2	1214.67	-0.296143	20.2614	1
DcMPLIVFIR	1	1	1	A0A0D2XGN9	C2(Carbamidomethyl)	0	0	0.009975	54.19	0.000414219	2	1263.65	-3.59341	52.7074	0
ELDQSVQQPQQPQR	1	1	1	A0A0D2Y9S4		0	0	0.01885	54.18	0.00069743	2	1680.83	-2.2071	22.8647	0
cLNNTLVGK	1	2	1	A0A0D2Y544	C1(Carbamidomethyl)	0	0	0.001345	54.15	0.000468817	2	1018.54	0.644877	27.3549	0
VADVAAIEGDYYK	1	1	1	A0A0D2XVL4		0	0	0.0001778	54.15	0.000522276	2	1413.69	-2.37988	46.3767	0
VGPTTPASDLLSLLR	1	1	1	A0A0D2Y4K1		0	0	0.000183	54.12	0.00017233	2	1539.87	-1.72335	52.8523	0
DAVPQLVQDVFGVEDR	1	2	1	A0A0D2XVX7		0	0	0.002225	54.12	0.000667051	2	1786.9	-0.93344	52.8308	0
QGSEITPSPR	1	2	1	A0A0J9WPA8		0	0	0.001673	54.09	0.000311564	2	1071.54	0.620974	16.9455	0
YKEEDEAEGKR	2	1	1	A0A0D2XA80		0	0	0.0003599	54.09	0.00053461	3	1353.63	-0.100785	8.75194	2
EVGLVEAVAGAK	1	1	1	A0A0D2Y8Q2		0	0	0.0001248	54.08	0.000360942	2	1142.64	0.00687989	46.0602	0
YNTILDK	1	3	1	A0A0D2XD29		0	0	0.01323	54.06	0.00027544	2	866.462	0.643545	29.6819	0
DQWSPALTISK	1	2	1	A0A0J9VQZ9		0	0	0.002331	54.04	0.000488141	2	1245.65	-0.721975	49.4625	0
KNILLSIGSYK	1	1	1	A0A0D2XQV2		0	0	0.0185	54.03	6.26656e-05	3	1235.74	1.33534	48.956	1
TQDEIDQANK	1	1	1	A0A0D2XWT9		0	0	0.002066	54.01	0.000402554	2	1161.54	-0.328792	13.23	0
SVPAPGQGVLTTAR	1	1	1	A0A0D2XQZ0		0	0	0.0008621	54.01	0.000205745	2	1353.75	2.54066	36.209	0
TAAVLAVTEVR	1	2	1	A0A0D2XH79		0	0	0.0005506	54	0.000270315	2	1129.66	0.457973	43.0229	0
GVDVVTNEVSNR	1	2	1	A0A0D2XJR4		0	0	0.0001071	54	0.000502411	2	1288.65	-1.05269	31.4351	0
SSTLNSLTDATSK	1	1	1	A0A0J9WKX2		0	0	0.0002945	54	0.00055317	2	1324.66	-1.57118	33.413	0
LIVQLTQER	1	2	1	A0A0J9WJQ4		0	0	0.006754	53.99	0.00026176	2	1099.65	0.656007	41.6447	0
QAVDVSPLR	1	1	1	A0A0D2XUS0		0	0	0.02227	53.97	0.000206246	2	984.545	-2.14077	31.8062	0
DSTLIMQLLR	1	2	1	A0A0D2XDJ9		0	0	0.006695	53.97	0.000281208	2	1189.66	-0.345679	52.6893	0
TGSGSYDDSFGRPSR	1	1	1	A0A0D2XQE8		0	0	0.002609	53.96	0.000596659	3	1588.7	2.49862	24.0059	0
FEGSTADR	1	1	1	A0A0D2Y0L8		0	0	0.009758	53.95	0.00030526	2	882.397	2.51157	11.6406	0
AGEGQILVK	1	2	1	A0A0D2XYW5		0	0	0.005394	53.94	0.000365097	2	914.53	-0.717827	26.2721	0
LEGAPQDTK	1	2	1	A0A0D2XZ45		0	0	0.002335	53.9	0.000337922	2	958.484	-0.504123	12.7154	0
IDLLDAPDIVTR	1	1	1	A0A0D2XC33		0	0	0.003475	53.85	0.000268069	2	1340.74	-0.431569	51.3864	0
AATQELGLNAK	1	1	1	A0A0D2XUT8		0	0	0.002027	53.82	0.000455827	2	1115.61	-0.0492569	28.0961	0
TTDDYLIR	1	1	1	A0A0D2XBZ0		0	0	0.01322	53.81	0.00044752	2	996.5	0.122587	36.3562	0
SIVATGPNELEEcK	1	3	1	A0A0D2XMP0	C13(Carbamidomethyl)	0	0	0.004754	53.81	0.000699354	2	1546.74	-2.26053	37.0428	0
DTNTFASAcLDR	1	1	1	A0A0D2XU70	C9(Carbamidomethyl)	0	0	0.0004301	53.78	0.000456276	2	1370.6	1.38573	38.4824	0
QGSQFAAYNFR	1	1	1	A0A0D2XBC8		0	0	0.0004129	53.76	0.000519597	2	1288.6	-1.87141	43.5411	0
KYGQTSNEVYESAETK	2	2	1	A0A0J9UDY3		0	0	0.01802	53.76	0.000860596	2	1833.85	0.257511	22.4903	1
LGVSFAAVR	1	1	1	A0A0D2XAY6		0	0	0.01609	53.74	0.000174773	2	919.535	-0.767106	46.0245	0
AITNIATELR	1	3	1	A0A0D2XSE9		0	0	0.002693	53.72	0.00035392	2	1101.63	1.63218	45.2708	0
EAHTLSLADNPPQTVTPLPYETTI	1	1	1	A0A0D2XI68		0	0	0.003872	53.69	0.000846575	2	2608.32	1.80728	51.2286	0
AVFNHAGLEVEQYR	1	2	1	A0A0J9VPV0		0	0	0.0003509	53.66	0.000683892	3	1632.81	-0.211973	40.8621	0
VPIGDQPTDIEK	1	2	1	A0A0D2X858		0	0	0.002091	53.61	0.000451626	2	1311.68	-0.571005	30.7253	0
TPDmGGSSTTHEFTK	2	1	1	A0A0D2XXN9	M4(Oxidation)	0	0	0.0002854	53.61	0.000587506	3	1611.69	-1.59397	16.9276	0
KITIEDEEK	1	1	1	A0A0D2X9I7		0	0	0.02537	53.6	0.000479949	2	1104.58	0.722321	19.0902	1
AVLVDLEPGPQDAIR	1	1	1	A0A0C4DHQ2		0	0	4.594e-05	53.57	0.000339766	2	1592.86	0.360648	50.538	0
LLNGLAVR	1	1	1	A0A0D2XZN4		0	0	0.02401	53.56	0.000131506	2	855.54	-0.840946	40.4928	0
TFIPDSPEYER	1	1	1	A0A0D2XDL8		0	0	0.001878	53.55	0.000611796	2	1353.63	-0.212586	41.9312	0
VVAGLKDDNDIR	2	1	1	A0A0D2XUH4		0	0	0.004555	53.53	0.000469338	2	1314.7	-4.0396	24.772	1
LFNDKDAEAVILGTR	1	1	1	A0A0D2XR18		0	0	0.0003933	53.51	0.000483983	3	1661.89	-0.0517456	50.3425	1
FLQFPTVLEK	1	1	1	A0A0D2XNK3		0	0	0.00193	53.5	0.000225799	2	1221.69	-0.540165	51.5234	0
AAQAAQAAQDAR	2	1	1	A0A0D2XZN4		0	0	0.0004817	53.49	0.000436744	2	1171.58	-0.436235	8.84151	0
NWEEGDETLDR	1	2	1	A0A0D2XUU5		0	0	0.000752	53.49	0.000489574	2	1363.58	-0.561992	35.5464	0
IVEIGNLGEGAGGAVTR	1	3	1	A0A0D2XDY6		0	0	0.0001575	53.47	0.000444382	2	1612.86	-0.912724	46.9121	0
IVEVFTEYFK	1	1	1	A0A0D2XYG9		0	0	0.009016	53.46	0.000539628	2	1274.67	0.314244	51.7081	0
VNVIPVIGR	1	2	1	A0A0J9WLE6		0	0	0.003537	53.45	2.80151e-05	2	966.61	0.771553	48.825	0
TPNQYLQWR	1	1	1	A0A0D2XHD8		0	0	0.006454	53.45	0.00048823	2	1205.6	-4.82905	46.4012	0
QIATDAcNSAIGSAEFYDHAK	1	1	1	A0A0D2XNE2	C7(Carbamidomethyl)	0	0	0.0001266	53.45	0.0011624	3	2269.01	-2.23185	43.7782	0
EDAANNYAR	1	1	1	A0A0D2X9U0		0	0	0.008642	53.43	0.000245355	2	1023.45	1.16431	12.7002	0
IAWILGPK	1	2	1	A0A0J9V3Q9		0	0	0.01628	53.41	0.00010352	2	897.555	-0.940478	51.1326	0
SLTVLcHGTLVR	1	1	1	A0A0D2XCS2	C6(Carbamidomethyl)	0	0	0.008345	53.4	0.000295965	2	1355.75	1.31385	40.3963	0
ISPLQNEVIK	1	4	1	A0A0J9VJ52		0	0	0.001161	53.36	0.000181759	2	1140.66	0.150688	40.5916	0
EGVLVAQK	1	1	1	A0A0D2XVK7		0	0	0.02345	53.35	0.000500759	2	843.495	1.62219	20.9829	0
FPTNEATTLFFGISK	1	1	1	A0A0D2XI04		0	0	9.766e-05	53.35	0.000687792	2	1672.86	-1.80599	52.212	0
ISDITPAHLSILNAK	1	4	1	A0A0D2YG00		0	0	7.424e-05	53.34	0.00018561	2	1592.9	-0.62496	49.4702	0
AEEILER	1	1	1	A0A0D2X8U8		0	0	0.01676	53.33	0.000552773	2	859.452	-0.293803	25.1572	0
VTILGFAFK	1	2	1	A0A0D2Y544		0	0	0.008835	53.33	9.1974e-05	2	995.592	-0.762257	52.3468	0
GVVTHSSGNHAQALALAAR	2	1	1	A0A0D2XMV9		0	0	0.02121	53.33	0.000529315	2	1859.98	-1.56608	25.9142	0
DAVLPGPGK	1	2	1	A0A0D2XM79		0	0	0.01865	53.32	0.000160627	2	853.478	0.0474963	25.4651	0
AAAGNTEDLAK	1	2	2	A0A0J9UI89;A0A0D2XGQ0		0	0	0.004469	53.31	0.000481126	2	1060.53	-0.0831969	14.8655	0
VIELcEANR	1	3	1	A0A0J9VGS3	C5(Carbamidomethyl)	0	0	0.01495	53.31	0.000488826	2	1103.56	4.43721	30.9141	0
TGVIYNVTK	1	1	1	A0A0D2XI68		0	0	0.003736	53.29	0.000235813	2	994.556	-0.666018	31.0489	0
VAVVAGFGDVGK	1	1	1	A0A0D2XZ51		0	0	0.0001638	53.27	0.00036854	2	1118.62	0.344986	44.9195	0
LITASSGNHGIGcALASQTLSK	1	1	1	A0A0D2XFL6	C13(Carbamidomethyl)	0	0	0.0001093	53.25	0.000710437	3	2186.13	2.24405	42.8223	0
TGAPLVVR	1	2	1	A0A0D2XD82		0	0	0.02131	53.2	0.000111042	2	812.5	1.24828	26.7778	0
EGFEAPIAR	1	1	1	A0A0D2XJP2		0	0	0.009794	53.18	0.00047531	2	989.51	5.10165	36.5546	0
GPASAVESLAAK	1	2	1	A0A0D2XQE1		0	0	0.002697	53.18	0.000477473	2	1100.6	0.749851	38.3205	0
LLGVEAGGDGVDTAR	1	1	1	A0A0D2Y8Q2		0	0	0.003089	53.17	0.000610869	2	1429.73	-0.628637	39.6367	0
VTAPYGLEGGDEGQR	1	1	1	A0A0D2XP34		0	0	0.001105	53.15	0.000766687	2	1548.73	-0.802316	35.2022	0
YGTDYYVLDK	1	2	1	A0A0D2XJN8		0	0	0.001134	53.14	0.000540611	2	1236.58	0.677564	43.309	0
VGQVAGPVK	1	1	1	A0A0D2YG01		0	0	0.01334	53.11	0.000131447	2	854.51	0.459865	16.8484	0
APNYDDLLAAQEK	1	1	1	A0A0D2XGN1		0	0	0.0002087	53.11	0.000678249	2	1447.71	1.05135	46.5511	0
TEEAFALGK	1	1	1	A0A0D2Y1X8		0	0	0.006194	53.1	0.000397945	2	965.493	-1.02001	35.411	0
QQTEDVTNTK	1	1	1	A0A0D2Y8V4		0	0	0.01874	53.09	0.000523308	2	1163.56	6.4781	10.5644	0
KDEDADLGLVK	1	1	1	A0A0D2XI04		0	0	0.01331	53.09	0.000564053	2	1202.63	0.819568	30.5014	1
SEGATLLAGGQPVDASK	1	2	1	A0A0D2Y589		0	0	0.00106	53.09	0.000680889	2	1600.82	1.00089	37.2116	0
VDDQFSAMFR	1	2	1	A0A0C4DHQ2		0	0	0.004419	53.08	0.000501388	2	1215.55	0.369569	50.7645	0
KLEEALNSFSEK	2	2	1	A0A0D2X8C8		0	0	0.001062	53.06	0.000692035	2	1394.72	-0.449934	36.755	1
EVTFGNQTcLVSQGPK	1	1	1	A0A0D2XKG2	C9(Carbamidomethyl)	0	0	0.008041	53.05	0.00092674	2	1764.86	2.4111	42.8349	0
VLSIYEPIHGSAPDISGK	3	4	1	A0A0D2XV18		0	0	2.061e-06	53.05	0.000606431	3	1882.99	-1.99923	48.6636	0
LLVEFGK	1	1	1	J9MJK9		0	0	0.02406	53.02	0.00015216	2	805.481	-0.608902	45.9358	0
IKPILTQEASDR	1	1	1	A0A0D2XJU6		0	0	0.002246	53	0.000417489	3	1370.76	0.458273	27.7716	0
FSSEDSFR	1	2	1	A0A0J9UCC3		0	0	0.02295	52.97	0.000348216	2	974.421	-0.00716579	28.1248	0
KGVAINFVTAEDVR	2	1	1	A0A0D2XDK5		0	0	0.003172	52.97	0.00046984	2	1518.82	-2.08245	46.0969	1
NLEQGPTGSAEK	1	2	1	A0A0J9U5B2		0	0	0.001565	52.94	0.000603693	2	1230.6	-0.507654	16.1294	0
GLPLLFLGLIK	1	2	1	A0A0D2XVX7		0	0	0.0001379	52.93	8.91329e-06	2	1183.78	-2.01308	53.9139	0
GSQFSTALEGALK	1	2	1	A0A0D2X8I1		0	0	0.0007066	52.93	0.000657037	2	1308.68	-0.824477	50.2476	0
LSELIASK	1	2	1	A0A0D2XQS1		0	0	0.01854	52.91	0.000244328	2	860.51	1.45967	29.8319	0
LNEEDPTGR	1	1	1	A0A0D2XHC5		0	0	0.006587	52.91	0.000387599	2	1030.48	1.063	17.5165	0
IIQVALDGLENILK	1	1	1	A0A0D2XCN6		0	0	5.53e-05	52.91	0.00010029	2	1538.91	-0.456763	52.7288	0
KAESHANSASFPTAK	1	1	1	A0A0D2Y9E9		0	0	2.183e-05	52.89	0.000803964	3	1545.77	0.985744	13.5649	1
KGELAAGNNVDK	2	2	1	A0A0D2XGU4		0	0	0.01252	52.88	0.000589679	2	1215.63	-1.60766	11.9772	1
KVETDGENDR	1	2	1	A0A0D2XK76		0	0	0.01072	52.85	0.000520097	2	1162.53	-0.0313416	7.79326	1
AIAALQEYSANEANVVR	1	1	1	A0A0D2X8B3		0	0	0.001023	52.84	0.000794554	2	1818.94	0.31606	49.3253	0
VLVAGTSAYcR	1	2	1	A0A0D2XVN0	C10(Carbamidomethyl)	0	0	0.006634	52.83	0.00054517	2	1196.61	-0.786668	30.7471	0
ILETLAAESER	1	2	1	A0A0J9ULB1		0	0	0.004659	52.83	0.000660614	2	1231.65	-0.826721	38.7852	0
LGPNVSIGPR	1	1	1	A0A0D2XR18		0	0	0.001398	52.82	0.000154107	2	1009.58	0.306991	37.2343	0
FDMSEYQER	1	1	1	A0A0D2XZI9		0	0	0.00243	52.8	0.000369464	2	1204.49	-0.82506	37.6595	0
TSLEESTcTQR	1	1	1	A0A0D2XC64	C8(Carbamidomethyl)	0	0	0.0005067	52.74	0.000590108	2	1311.59	0.617152	17.8912	0
GIYAYGYESPSAVQSR	1	1	1	A0A0D2XU92		0	0	0.0002012	52.74	0.00101234	2	1747.82	-2.35768	42.2145	0
APFEFPVVcTPADLK	1	1	0		C9(Carbamidomethyl)	0	0	1.772e-05	52.72	0.000825635	2	1690.85	-2.95736	51.6287	0
QTVAVGVIK	1	2	1	A0A2C8D0A4		0	0	0.008104	52.7	0.00026234	2	914.568	0.947286	31.2156	0
QGLEHNVQNPSVELSDSFR	1	2	1	A0A0D2XJP0		0	0	0.0002449	52.66	0.00125988	3	2156.03	-1.49759	45.6623	0
AGLAFPVGR	1	1	1	A0A0D2XW09		0	0	0.003563	52.65	0.000679335	2	887.51	-0.215414	45.302	0
LSPSGEDAAIKR	1	1	1	A0A0D2XCF2		0	0	0.005024	52.64	0.000581257	2	1243.66	-1.12086	19.6475	1
LSPGGGATEMAVSVR	1	2	1	A0A0D2XUN7		0	0	0.0004153	52.64	0.000688796	2	1431.74	8.0931	38.7366	0
TAFGNGTVFVER	1	3	1	A0A0J9WHE4		0	0	0.0005367	52.63	0.000651908	2	1297.65	0.204132	45.9919	0
cDIIANDQGNR	2	1	1	A0A0D2XA80	C1(Carbamidomethyl)	0	0	0.001595	52.62	0.000634812	2	1275.57	-1.28543	21.8216	0
LVLAIGDK	1	1	1	A0A0D2Y9B3		0	0	0.01371	52.61	0.000338013	2	828.519	-0.0891204	41.9012	0
VVPEDQLQTDSR	2	2	1	A0A0J9WQU1		0	0	0.007018	52.61	0.000721807	2	1386.68	-2.50135	27.0225	0
VGDPIEcSVIGNVFGK	1	2	1	A0A1D6QVK6	C7(Carbamidomethyl)	0	0	1.46e-05	52.6	0.000848766	2	1690.85	-0.579849	51.6287	0
LLTATPDDNSPVILLWNLR	1	1	1	A0A0D2XVK2		0	0	0.0003911	52.6	0.000355828	2	2151.17	-4.98226	53.2345	0
VFVDSEYPR	3	1	1	A0A0D2Y8Z1		0	0	0.002746	52.58	0.000632129	2	1111.54	0.572868	36.0052	0
LETDPALLVR	1	1	1	A0A0D2XGE7		0	0	0.001465	52.58	0.000225248	2	1126.65	-0.70091	47.6839	0
EVEGELTEGDLR	1	2	1	A0A0J9V792		0	0	0.0004695	52.56	0.000740148	2	1346.64	-0.91471	36.9805	0
VTTGVLASTQTSK	1	1	1	A0A0D2XK80		0	0	8.799e-05	52.54	0.000434605	2	1292.7	-1.55521	24.9622	0
GHVFSEEQRPGTPLFNIK	3	2	1	A0A0J9UYI6		0	0	0.001351	52.54	0.000861688	2	2056.06	-2.75955	45.18	0
EDAEFLTR	1	1	1	A0A0D2YC02		0	0	0.01223	52.52	0.000404705	2	980.466	-2.89512	34.4198	0
VPAEGPAALQR	1	1	1	A0A0D2XHT9		0	0	0.002796	52.46	0.000360391	2	1108.61	-0.76337	27.0283	0
STTTGHLIYQcGGIDKR	1	15	1	A0A2C8D0A4	C11(Carbamidomethyl)	0	0	1.718e-05	52.45	0.00112917	3	1906.94	-4.04935	28.2294	1
ETDEQLAK	1	1	1	A0A0D2XCS2		0	0	0.01666	52.44	0.000412514	2	933.452	-0.42677	12.4072	0
LNEEYILR	1	1	1	A0A0D2XEN9		0	0	0.00913	52.44	0.000448434	2	1049.56	1.32545	42.1998	0
GTTFAVSSLR	1	2	1	A0A0J9VCC4		0	0	0.006176	52.43	0.000376033	2	1038.56	-0.326014	40.8272	0
STGLGDYSGR	1	4	1	A0A0D2XN20		0	0	0.003984	52.42	0.000569073	2	1012.47	-1.00735	23.9271	0
AETTTAVNEK	1	1	1	A0A0D2XVA7		0	0	0.001316	52.41	0.000559189	2	1063.53	0.590468	10.1612	0
VKDHAWVK	2	2	1	A0A0J9UH90		0	0	0.01583	52.38	0.000209849	2	982.547	0.249799	12.206	1
MVNDAEQFK	1	1	1	A0A0D2XAH7		0	0	0.00245	52.38	0.000556706	2	1081.5	0.00676319	26.2989	0
LHQSPGLDGELSQFDK	2	1	1	A0A0D2XWL4		0	0	0.007348	52.37	0.00104935	3	1770.86	-0.565291	45.9602	0
SDVAVIASR	1	1	1	A0A0D2XGW2		0	0	0.01564	52.33	0.000618708	2	917.504	-1.33894	25.7893	0
FEVALPEFPK	1	2	1	A0A0D2XGU4		0	0	0.008559	52.33	0.000520463	2	1176.63	-0.99396	51.433	0
EIDETTTSYTYR	1	1	1	A0A0D2XQZ1		0	0	0.0004043	52.32	0.000819128	2	1478.66	-1.55022	31.7473	0
DAGLIAGLNVLR	2	2	2	A0A0D2XA80;A0A0D2XQC1		0	0	0.0008804	52.3	0.000230827	2	1211.71	-0.890456	51.7229	0
SVVPANLTVYDIAGLTR	1	1	1	A0A0D2Y1Y9		0	0	0.0003118	52.29	0.00042701	2	1788.98	-1.49002	51.92	0
TIFSYPASTGR	1	1	1	A0A0D2YGI9		0	0	0.0086	52.26	0.000625492	2	1199.6	-0.537929	42.288	0
EDDTTDLK	1	1	1	A0A0D2XQ76		0	0	0.01091	52.23	0.000311772	2	936.416	0.13646	13.8924	0
AAESNLNFIK	1	4	1	A0A0J9VRH6		0	0	0.004284	52.21	0.000560895	2	1106.58	-0.172962	41.3715	0
YSTYPGVAMR	1	4	1	A0A0C4DHU4		0	0	0.001239	52.21	0.000596966	2	1144.55	-0.11668	35.664	0
GIIKPVVTHSK	1	1	1	A0A0D2XUS1		0	0	0.000945	52.21	3.72728e-05	2	1178.73	0.321065	17.6252	0
NASNVSLSVPQHGAAK	1	2	1	A0A0J9UBL7		0	0	0.006923	52.17	0.000842757	2	1579.81	-3.93319	25.3992	0
LSAEVcSLTPEQDR	1	2	1	A0A0D2XD23	C6(Carbamidomethyl)	0	0	0.0007085	52.17	0.0010002	2	1604.76	2.01341	38.3837	0
IQGPIYSPDQAQAGTDNR	1	1	1	A0A0D2Y960		0	0	0.007503	52.15	0.0013041	2	1930.93	0.463938	35.0495	0
QLEAVLSEGK	1	2	1	A0A0D2XD23		0	0	0.003304	52.12	0.000726694	2	1073.59	1.26614	35.6085	0
ISDTIEFSR	1	2	1	A0A0D2XQB6		0	0	0.003649	52.11	0.000703147	2	1067.54	0.895542	39.0745	0
SLDVYWQQLR	1	3	1	A0A0J9WHE4		0	0	0.002787	52.11	0.000741288	2	1307.67	-0.698842	50.9013	0
LVLVGDGGTGK	1	1	1	A0A0D2X8T7		0	0	0.0009983	52.06	0.000625412	2	1015.58	0.354064	32.6597	0
EVVTLTSDLSR	1	1	1	A0A0D2XHG1		0	0	0.0004974	52.06	0.000582162	2	1219.65	-0.426311	42.5488	0
GTGTVLYNPVVR	1	1	1	A0A0D2XD59		0	0	0.006202	52.05	0.000446282	2	1275.71	-0.476322	43.1771	0
IVEWINENAK	1	1	1	A0A0D2Y1Y9		0	0	0.001365	52.04	0.000729889	2	1215.64	0.716999	42.8813	0
ATAGDTHLGGQDFDTNLLDHck	2	1	1	A0A0D2XAH7	C21(Carbamidomethyl); K22(GlyGly)	0	0	2.865e-06	51.98	0.00186389	3	2500.12	0.502889	42.6577	0
mGGQSLEQK	1	1	1	A0A0D2Y1Y9	M1(Oxidation)	0	0	0.01814	51.96	0.000511347	2	993.469	2.27443	9.78161	0
ITPSYVAFTEDER	2	1	1	A0A0D2XQC1		0	0	0.0005749	51.95	0.00109366	2	1527.73	-2.57638	48.1944	0
IEVEYLGENK	1	1	1	A0A0D2XAH7		0	0	0.001776	51.94	0.000727059	2	1193.6	-0.089957	40.2604	0
ATYASAGLSFDK	1	2	1	A0A1D6QVK6		0	0	0.0004317	51.93	0.000789329	2	1230.6	-1.18714	41.0934	0
IYNcNTEDTSR	1	1	1	A0A0J9V063	C4(Carbamidomethyl)	0	0	0.0001908	51.91	0.000607452	2	1372.58	-1.10058	15.6845	0
DIFQEIYESTYK	1	2	1	A0A0D2XM79		0	0	0.0006041	51.91	0.000925349	2	1535.72	-1.32737	52.4361	0
ILEQPLAR	1	1	1	A0A0J9UC03		0	0	0.02528	51.9	0.000122029	2	939.561	-0.843302	31.2794	0
VLDLLAHVAK	2	1	1	A0A0D2XVJ4		0	0	0.001622	51.89	6.95678e-05	2	1078.66	0.973581	48.9572	0
ATDVMIAGK	1	1	1	A0A0D2XZ51		0	0	0.007133	51.86	0.000520977	2	905.473	-3.39186	24.944	0
EAFELITSDAK	1	4	1	A0A0J9VRH6		0	0	0.002243	51.86	0.000869272	2	1223.62	0.543607	48.3177	0
ETIQDLSIQYR	1	3	1	A0A0J9UBP2		0	0	0.001499	51.85	0.000926139	2	1365.7	0.940715	48.3247	0
VALTGLTVAEYFR	1	1	1	A0A0D2YC97		0	0	0.0009663	51.82	0.000545527	2	1439.77	-15.2592	51.9318	0
GGQPVGEYVVTATPIPGFPR	1	1	1	A0A0D2Y968		0	0	8.812e-06	51.81	0.000807818	2	2042.07	0.694287	51.2126	0
LTAVTGDLTQPR	1	1	1	A0A0J9WQN3		0	0	0.0007054	51.8	0.000606517	2	1271.7	7.03151	35.9106	0
MLDVGFER	1	1	1	A0A0D2XX58		0	0	0.01621	51.79	0.000618179	2	966.472	0.28449	45.4001	0
FVEKPVEFVGNR	1	2	1	A0A0J9UH90		0	0	0.003341	51.79	0.000697976	2	1420.75	-4.41914	36.7349	0
TVADELEVTEGmR	1	2	1	A0A0D2XVI4	M12(Oxidation)	0	0	0.0005717	51.79	0.000961869	2	1465.69	0.84736	40.2169	0
VSVDEAIQR	1	1	1	A0A0D2XZE9		0	0	0.005543	51.78	0.000799147	2	1016.54	-0.895053	29.4674	0
GLSKPEDLVFGR	1	1	1	A0A0D2XQG2		0	0	0.001214	51.78	0.000627569	3	1317.71	-1.05063	46.1626	0
YFVEQGHNIALcQSFAK	1	2	1	A0A0J9VPV0	C12(Carbamidomethyl)	0	0	1.219e-05	51.78	0.00145758	3	2011.97	-0.762738	47.0147	0
ATVEAEDEESYK	1	2	1	A0A0J9ULC8		0	0	0.002006	51.75	0.000678035	2	1370.59	-1.32027	21.7706	0
GSLEYFSEQGENDSNETR	1	1	1	A0A0J9VF77		0	0	0.01381	51.72	0.00121102	2	2061.86	-2.45866	41.325	0
VDDIcSAK	1	2	1	A0A0D2XUN7	C5(Carbamidomethyl)	0	0	0.01656	51.71	0.000381446	2	907.419	-0.0136527	14.8229	0
DTASLPESAAR	1	2	1	A0A0D2X961		0	0	0.01721	51.69	0.00066646	2	1117.55	1.14439	24.0876	0
IGIQLLAK	1	3	1	A0A0J9VBI1		0	0	0.0168	51.68	0.000100862	2	855.567	0.724426	49.3723	0
TLSDYNIQK	1	3	1	A0A0D2XGI2		0	0	0.008232	51.66	0.000753984	2	1081.55	-0.136477	29.1389	0
SAQIFDVQTGEK	1	3	1	A0A0D2Y2N0		0	0	0.004885	51.64	0.000954885	2	1322.66	-0.547925	39.6719	0
FAIENASR	1	1	1	A0A0D2X830		0	0	0.01225	51.58	0.000562622	2	907.463	-0.412261	27.8514	0
LGFIGVVNR	1	2	1	A0A0D2X858		0	0	0.01212	51.57	0.000266808	2	974.576	-2.18956	49.7634	0
IFELVPLEGK	1	1	1	A0A0D2XLD1		0	0	0.003517	51.56	0.000414401	2	1144.66	1.28075	51.444	0
VTQNLVQER	1	2	1	A0A0J9WLM2		0	0	0.002902	51.55	0.000759678	2	1086.59	-0.0973786	22.7582	0
GKPLPDIFLLALK	1	1	1	A0A0D2Y584		0	0	0.003377	51.54	4.87511e-05	3	1424.89	0.261651	52.1844	0
ITSFEAHPDYIR	2	1	1	A0A0D2XU70		0	0	0.004718	51.53	0.000956881	2	1448.72	2.0673	37.2961	0
ALDEIYGSTTEASAHK	2	2	1	A0A0D2XCJ2		0	0	0.0003678	51.53	0.00125534	2	1692.81	0.626207	32.787	0
WATHGPPSTTNcHPHR	1	1	1	A0A0D2X8I1	C12(Carbamidomethyl)	0	0	3.624e-05	51.53	0.00140157	4	1855.84	-0.0487609	14.68	0
VEQAEIQYEPSGR	1	4	1	A0A0J9V3J9		0	0	0.001357	51.49	0.00108778	2	1505.71	-6.03331	30.1177	0
GIDLDQLLDLSSDQLR	1	1	1	A0A0D2X9U6		0	0	0.0007821	51.49	0.00097496	3	1800.93	0.169867	52.7638	0
NDEEGAK	5	1	1	A0A0D2Y4L7		0	0	0.02342	51.48	0.000184916	2	762.326	-0.0231995	1.0361	0
TGAYLINASR	1	3	1	A0A0D2XC02		0	0	0.005744	51.47	0.000583827	2	1065.57	-1.71662	33.5193	0
NSAAYWLGDSNNESVQR	1	2	1	A0A0D2X8C8		0	0	0.0004826	51.47	0.00143711	2	1910.86	0.39861	45.1586	0
LSGGQVVR	1	2	1	A0A0J9V792		0	0	0.009938	51.46	0.00094385	2	815.473	-0.0564881	16.1716	0
GPLATPVGK	1	1	1	A0A0D2XQN4		0	0	0.007614	51.46	0.000132539	2	839.5	1.67393	24.068	0
VAWNNPEK	1	1	1	A0A0D2XEN9		0	0	0.01024	51.46	0.000387614	2	957.479	-0.35309	26.1787	0
IAEQYGIDLVK	1	2	1	A0A0J9WKQ6		0	0	0.01646	51.46	0.000639831	2	1248.68	-1.53373	48.6472	0
LVLATGGTPR	1	2	1	A0A0D2Y302		0	0	0.01396	51.45	0.000312955	2	984.583	-0.542177	30.3715	0
EVTTQQGEEEAKK	1	3	1	A0A0D2Y2E3		0	0	0.01326	51.44	0.00106054	2	1476.72	1.06627	9.83775	1
cVVYLNSDEEASR	1	2	1	A0A0D2YGM3	C1(Carbamidomethyl)	0	0	0.005483	51.41	0.00102742	2	1541.68	-4.50951	34.7959	0
LVFLGEQSVGK	1	1	1	A0A0D2Y2E3		0	0	0.001529	51.4	0.000413653	2	1176.66	1.38249	48.9243	0
FTDGFmIHSGQPAK	2	1	1	A0A0D2XZN4	M6(Oxidation)	0	0	0.006114	51.4	0.00112722	2	1551.72	-2.35647	33.7325	0
ETAEAYLSKPIK	1	1	1	A0A0D2XX39		0	0	0.0002655	51.39	0.00069561	2	1349.73	-1.47268	33.9733	0
LEILQIHTK	2	5	1	A0A0D2XZD6		0	0	0.01194	51.38	9.75225e-05	2	1094.66	0.0426164	41.5752	0
INFNLYDK	1	2	1	A0A0D2XB44		0	0	0.02425	51.36	0.00049425	2	1026.53	-0.180362	47.6891	0
DNNcTILSHGcTGK	2	2	1	A0A0D2YBW7	C4(Carbamidomethyl); C11(Carbamidomethyl)	0	0	0.0001128	51.36	0.00110292	3	1576.69	0.845294	22.7379	0
YFESSPNVSWVLWPGSESHPTYAQAK	1	1	1	A0A0D2YG02		0	0	5.87e-08	51.31	0.00254609	3	2967.39	-1.71418	51.4548	0
NYLNSQGADSESK	1	1	1	A0A0D2Y1X8		0	0	0.001288	51.3	0.000869186	2	1412.63	-0.373632	20.9632	0
FIVcDAGGSQAR	1	2	1	A0A0J9URF5	C4(Carbamidomethyl)	0	0	0.01735	51.24	0.000892928	2	1280.6	-2.56832	30.1442	0
DVYGVHIDLVR	2	1	1	A0A0D2Y8Z1		0	0	0.0004868	51.24	0.000765152	2	1285.69	-0.738015	50.1822	0
DEGILDLLISK	1	1	1	A0A0D2XDT4		0	0	0.002971	51.23	0.000660693	2	1215.68	0.896944	53.1193	0
SLELFQEIAEDKEQFDK	1	2	1	A0A0D2XK76		0	0	0.000149	51.21	0.0016832	3	2069	-2.51806	51.2769	1
SGDYAQGLK	1	4	1	A0A0J9US49		0	0	0.002426	51.2	0.000733545	2	938.458	0.119388	21.5025	0
ISSVLSIPTR	1	3	1	A0A0D2XPT8		0	0	0.0108	51.19	0.000368758	2	1072.64	-0.0907793	45.9009	0
VAADDMER	1	1	1	A0A0D2XVP6		0	0	0.01011	51.18	0.000355891	2	906.399	0.186424	15.4719	0
STLTDSLLAK	1	1	1	A0A0D2XQM8		0	0	0.009646	51.18	0.000463725	2	1048.59	-0.0808659	45.0457	0
mTDNVAGAVSR	1	2	1	A0A0J9ULC8	M1(Oxidation)	0	0	0.0002361	51.16	0.00067028	2	1136.53	-2.33625	19.3015	0
AYLPTELQNEDVR	1	1	1	A0A0D2XGR6		0	0	0.001704	51.14	0.00112524	2	1547.77	1.2592	45.8653	0
AGFSDEQVPTR	1	4	1	A0A0J9WGA9		0	0	0.001179	51.1	0.000842616	2	1206.58	0.80727	29.5422	0
VVAVEAGSK	1	1	1	A0A0D2Y8Q2		0	0	0.00321	51.08	0.00102587	2	859.488	0.0460961	14.0341	0
NTSTFSSGASDSK	1	2	1	A0A0J9WKX2		0	0	0.0003895	51.07	0.000730822	2	1288.56	-0.835649	14.0754	0
ATYAVIAEGK	1	1	1	A0A0D2XXN9		0	0	0.008223	51.05	0.000528856	2	1022.55	1.26626	30.6548	0
AHQVPIADPATNPAHLK	2	2	1	A0A0D2XVR8		0	0	0.000302	51.05	0.000751078	4	1779.95	1.42483	29.146	0
VDFSKPDQPQALALAPSR	2	2	1	A0A0J9WKQ6		0	0	0.0009665	51.04	0.000924779	2	1940.02	0.454856	44.5852	0
SDGLGLVSEGK	1	3	1	A0A0D2Y266		0	0	0.001511	51.03	0.000860646	2	1061.55	-2.16642	34.9181	0
LISDGLIIR	1	2	1	A0A0D2XNM2		0	0	0.009358	51.02	0.00030283	2	999.618	-2.0387	50.0984	0
ELDEEEQR	1	2	1	A0A0D2XN77		0	0	0.009252	51.01	0.000598735	2	1047.46	0.999786	13.7141	0
LLSEFFDGKK	2	1	1	A0A0D2XAH7		0	0	0.003921	50.99	0.000539	2	1183.64	0.806877	47.5557	1
MSGDLPEGWEK	1	4	1	A0A0D2XN20		0	0	0.0007449	50.99	0.000916777	2	1248.56	-0.900064	42.1959	0
AAEPLADDTFGTGHLSK	1	1	1	A0A0D2XER4		0	0	4.512e-05	50.98	0.00138811	3	1729.84	1.92049	39.7425	0
HLIcESYcK	1	1	1	A0A0D2XUX6	C4(Carbamidomethyl); C8(Carbamidomethyl)	0	0	0.0009616	50.93	0.000634083	2	1209.54	-1.01684	22.009	0
DFSETLTQAK	1	1	1	A0A0D2XQC1		0	0	0.008234	50.92	0.000951497	2	1139.56	0.0787123	38.3809	0
EVTPAQVILAWSTLDNHIVIPK	1	1	1	A0A0D2Y552		0	0	1.29e-05	50.92	0.000349529	3	2444.35	-2.69215	53.2175	0
VVAVGDGGDLK	1	1	1	A0A0D2X8L1		0	0	0.001217	50.91	0.000857591	2	1029.56	-0.739159	26.7344	0
DGSDHHILIR	2	1	1	A0A0D2Y968		0	0	0.004285	50.89	0.000775598	2	1162.6	0.813986	20.8523	0
NIDEFADcSR	1	1	1	A0A0D2XVF0	C8(Carbamidomethyl)	0	0	0.009457	50.89	0.00062773	2	1226.51	-2.50251	33.6687	0
DHGDVSNQLYAK	1	1	1	A0A0D2XAN8		0	0	0.0001104	50.88	0.00111586	2	1346.63	-0.248761	22.3851	0
SAcSAcDGTGTR	1	2	1	A0A0D2XWC9	C3(Carbamidomethyl); C6(Carbamidomethyl)	0	0	0.00512	50.87	0.000493125	2	1242.48	-0.398665	8.88705	0
NADSLELLR	1	5	1	A0A0J9UCJ6		0	0	0.007387	50.85	0.000961202	2	1030.55	-0.492559	46.2035	0
cATITPDEAR	1	2	1	A0A0D2XM79	C1(Carbamidomethyl)	0	0	0.002474	50.85	0.000800042	2	1133.52	-0.578159	20.7246	0
LEAEDEGVPSTAIR	1	1	1	A0A0J9UJ99		0	0	0.002398	50.85	0.00117622	2	1486.74	2.12777	35.515	0
GDVVPNDAHAAVATLK	2	1	1	A0A0D2XAP0		0	0	1.683e-05	50.85	0.00100149	2	1577.83	-1.30675	36.3268	0
GHTEWAScVR	2	1	1	A0A0C4DHS7	C8(Carbamidomethyl)	0	0	0.001961	50.84	0.000855455	2	1202.54	-0.0069239	23.627	0
sAAQLLNPK	1	1	1	A0A0D2XVQ3	N-Term(Acetyl)	0	0	0.006465	50.82	0.000347736	2	983.55	-2.06488	48.6103	0
GATVPTNDQILVPETLLK	1	1	1	A0A0D2Y2S2		0	0	4.922e-06	50.81	0.000389615	2	1909.06	-0.97317	51.3438	0
GDLIVNNDDGLIK	1	1	1	A0A0J9V7M7		0	0	0.0001553	50.79	0.000932056	2	1385.73	-0.397771	48.3191	0
ELDVATITK	1	7	1	A0A0J9UPQ3		0	0	0.004033	50.78	0.000671407	2	989.551	0.0383005	38.8055	0
ELTSLIQK	1	1	1	A0A0D2XZN4		0	0	0.01172	50.77	0.000471948	2	931.547	1.15113	38.4811	0
DcNAAIAALK	1	2	1	A0A0D2X9U0	C2(Carbamidomethyl)	0	0	0.003765	50.76	0.000918789	2	1046.53	0.33992	36.49	0
LIGNVGSTFANSSK	1	1	1	A0A0D2XC36		0	0	0.001014	50.76	0.000850793	2	1394.74	10.053	40.6444	0
LVSQGTIVPQPEPVVPK	2	1	1	A0A0D2XUT9		0	0	0.0006676	50.76	0.000271985	2	1788.02	-2.24868	45.6582	0
VLTITGGcDAISR	1	1	1	A0A0D2XD59	C8(Carbamidomethyl)	0	0	0.0001676	50.71	0.00110988	2	1362.7	-1.79736	41.1453	0
LPLQDVYK	2	2	1	A0A2C8D0A4		0	0	0.01193	50.7	0.000566007	2	975.551	-0.103958	40.885	0
IIScGTASQYNKPVEEQYGVTNLSEIFR	1	1	1	A0A0D2YG03	C4(Carbamidomethyl)	0	0	7.585e-05	50.69	0.00234475	3	3203.56	-2.06423	51.1175	0
IQSmDGDVDVSQR	1	1	1	A0A0D2XQI5	M4(Oxidation)	0	0	0.009875	50.66	0.00113991	2	1465.66	-1.64202	20.9803	0
aDNDSPVTLR	1	1	1	A0A0D2YBR1	N-Term(Acetyl)	0	0	0.004887	50.65	0.000845065	2	1129.55	1.3528	38.4836	0
IEEMLQFLKPEQLWIDPDcGLK	1	1	1	A0A0D2Y8Z1	C19(Carbamidomethyl)	0	0	0.0002316	50.65	0.00190624	3	2702.35	-2.59648	52.4993	0
IIWNQQTVVDR	1	2	1	A0A0D2XM33		0	0	0.001634	50.63	0.000828639	2	1371.74	5.05877	44.3301	0
LLNTNVDGK	1	1	1	A0A0D2XDE8		0	0	0.008587	50.61	0.00115441	2	973.53	-1.28851	24.2139	0
LQIWDTAGQER	4	6	3	A0A0D2Y939;A0A0D2XWY5;A0A0D2Y2E3		0	0	0.008129	50.61	0.00114008	2	1316.66	0.702246	47.7516	0
ENIEVEVIK	1	1	1	A0A0D2XCK5		0	0	0.01201	50.58	0.000873234	2	1072.59	-1.45409	40.9625	0
QSSVLVATGQGK	1	1	1	A0A0D2XE49		0	0	0.004567	50.58	0.00082336	2	1174.64	0.160529	23.8893	0
ASVLEQVIEK	1	2	1	A0A0J9V792		0	0	0.005316	50.54	0.000766513	2	1115.63	-0.271244	49.4664	0
DLEGSDTDSR	1	2	1	A0A0J9UC68		0	0	0.002627	50.52	0.000478621	2	1094.46	-0.825492	13.78	0
LLPVLIDEIAR	1	1	1	A0A0D2YG01		0	0	0.0009872	50.52	9.49257e-05	2	1251.77	-0.612158	52.2106	0
GQWNDLLPFLVK	1	1	1	A0A0D2XQA6		0	0	0.001341	50.5	0.000763356	2	1429.78	-0.611783	52.8209	0
QLFVDLTSK	1	1	1	A0A0D2XHT9		0	0	0.009699	50.48	0.000504538	2	1050.58	-1.48756	50.1023	0
EILEEHSPAR	1	1	1	A0A0D2XA20		0	0	0.004271	50.43	0.00116387	2	1180.6	2.39458	20.363	0
GLLLYGPPGTGK	2	2	2	A0A0D2Y968;A0A0D2Y9E2		0	0	0.0004779	50.4	0.000756513	2	1172.67	-0.134201	48.5787	0
TEGVSTTGLITR	1	2	1	A0A0D2XN77		0	0	0.0002785	50.4	0.00082309	2	1234.66	-0.351208	35.691	0
GVQEESGLAETGR	1	2	1	A0A0J9WFZ0		0	0	0.0007691	50.4	0.00110627	2	1332.64	-2.09602	24.5602	0
LYIYQLFR	1	1	1	A0A0D2XCF2		0	0	0.02352	50.38	0.00101105	2	1115.62	-0.663542	52.2415	0
cGADIIVATPGR	1	1	1	A0A0D2Y2W7	C1(Carbamidomethyl)	0	0	0.004291	50.37	0.0010818	2	1229.63	-3.05343	36.9105	0
EEYEEHQKELEGK	2	1	1	A0A0D2XA80		0	0	0.006694	50.32	0.00165821	2	1647.75	-0.326623	16.0216	1
APEALFQPSVLGLESGGIHVTTFNSImK	1	1	1	A0A2C8D194	M27(Oxidation)	0	0	1.02e-08	50.29	0.0014887	3	2959.52	-2.38677	51.6961	0
NAEAAGAASLK	1	1	1	A0A0D2XQE8		0	0	0.001318	50.28	0.00102241	2	1002.52	0.507675	17.8803	0
SVcTEAGMYAIR	1	2	1	A0A0D2X9D5	C3(Carbamidomethyl)	0	0	0.001014	50.28	0.00112132	2	1357.63	1.80099	41.1636	0
STQLSDGAPAASDEWK	1	1	1	A0A0D2Y8V4		0	0	0.006669	50.27	0.00163794	2	1662.76	-0.136956	36.6872	0
HPAVANQAGK	1	1	1	A0A0J9ULB1		0	0	0.01393	50.26	0.000750686	2	992.528	0.879039	7.71746	0
RLEETVPLQNQVVSVEDK	2	1	1	A0A0D2XQA6		0	0	0.002744	50.26	0.00110955	2	2083.1	-3.39708	43.7354	1
SPLDEYADTLR	1	1	1	A0A0D2Y4M4		0	0	0.001591	50.25	0.00104319	2	1279.61	-2.87644	49.6056	0
LGTSSIVDEK	1	3	1	A0A0J9UBY2		0	0	0.0009316	50.24	0.000842624	2	1048.55	0.154873	28.0352	0
ADSNFAAQSYLR	1	1	1	A0A0D2YG05		0	0	0.0002917	50.24	0.00121355	2	1342.64	-0.949325	42.5852	0
LIPLLPWGSEFEK	1	2	1	A0A0D2X916		0	0	0.0009166	50.22	0.000876933	2	1528.84	-0.292725	52.8237	0
LQQLVSLADGYEK	1	2	1	A0A0J9WGU0		0	0	0.0008999	50.21	0.00110572	2	1463.77	-2.66579	49.9113	0
TPVMDALYK	1	1	1	A0A0J9V2G6		0	0	0.00413	50.19	0.00100553	2	1037.53	-2.61189	43.7641	0
VESHAWTDAVTAK	2	3	1	A0A0J9ULE1		0	0	0.000566	50.18	0.00128608	3	1414.7	0.769041	30.9943	0
NEDDVATAILK	1	1	1	A0A0D2XZD6		0	0	0.003034	50.15	0.00115491	2	1188.61	-0.476421	45.6162	0
TNNLGDNVVVK	1	1	1	A0A0D2XMZ6		0	0	0.008736	50.13	0.00107387	2	1172.63	0.0780249	29.2125	0
NLAFDEQTGEWQR	1	1	1	A0A0D2XCS0		0	0	0.008363	50.12	0.001535	2	1593.73	-1.44629	46.8309	0
LHEIATTPYQK	1	2	1	A0A0D2Y2S4		0	0	0.0008609	50.07	0.00118819	2	1300.69	-2.52513	24.3172	0
HAVSEGTK	1	2	1	A0A0D2XW08		0	0	0.02391	50.05	0.000313866	2	828.421	0.253388	6.724	0
SAENFGIPNAVK	1	1	1	A0A0D2XX10		0	0	0.0004981	50.05	0.0012782	2	1246.64	-0.933876	43.2111	0
LSVNDFLIK	1	1	1	A0A0D2Y5A7		0	0	0.00862	50.04	0.000400296	2	1048.6	-0.314844	51.456	0
SIEESGGDVGK	1	1	1	A0A0J9WH31		0	0	0.01717	50.03	0.000793003	2	1077.51	2.70565	15.5434	0
QIIADDDDEEcK	1	1	1	A0A0D2XMK0	C11(Carbamidomethyl)	0	0	0.002172	50.02	0.000947626	2	1450.6	-2.71904	23.2004	0
LDEQYSEFASEEEK	1	4	1	A0A0D2XJR4		0	0	5.115e-05	50	0.001369	2	1703.72	-3.44633	40.2385	0
QALVQFDR	1	1	1	A0A0D2Y5E6		0	0	0.01983	49.97	0.000962627	2	976.52	-0.934031	37.9576	0
THLNVVVIGHVDSGK	6	8	1	A0A2C8D0A4		0	0	0.02088	49.96	0.000840708	2	1574.86	-2.21194	35.9446	0
TAIPDAAIENIQK	3	1	1	A0A0D2XQN4		0	0	0.0004755	49.95	0.000795607	2	1383.75	-0.470692	44.2429	0
SEAQALGcPSAPEPAIK	1	4	1	A0A0D2XHA3	C8(Carbamidomethyl)	0	0	0.002099	49.94	0.00179564	2	1725.85	-1.20326	36.6181	0
SPAVQQTAEK	1	1	1	A0A0D2X9K0		0	0	0.001043	49.92	0.000985487	2	1058.55	0.638745	10.1344	0
SPDTELNKGENR	2	5	1	A0A0J9UW30		0	0	0.005103	49.9	0.00134051	2	1359.66	4.21132	12.8487	1
DTVAETVAEPEPK	1	1	1	A0A0D2XYA9		0	0	0.007036	49.9	0.00139986	2	1385.67	-6.64344	29.3199	0
EQQVEHTTGVLR	2	3	1	A0A0D2XUT8		0	0	0.0006375	49.9	0.0012433	2	1396.72	0.15461	20.3724	0
VVQATGAVVQSTcSDILPEHLGTcGK	2	1	1	A0A0D2XVP6	C13(Carbamidomethyl); C24(Carbamidomethyl)	0	0	0.0009689	49.9	0.0025787	3	2727.34	-1.58852	48.4202	0
DQEIELVGK	1	1	1	A0A0D2XCJ5		0	0	0.02056	49.89	0.00101745	2	1030.54	-0.137661	35.7101	0
NVGVcFADASVR	1	1	1	A0A0D2XVS0	C5(Carbamidomethyl)	0	0	0.001511	49.88	0.00132923	2	1294.62	-1.61691	42.9519	0
TGQFGWSANmER	1	2	1	A0A0D2XK76	M10(Oxidation)	0	0	0.002667	49.88	0.00108559	2	1399.61	-0.604572	36.869	0
YTEAHEHLTAATR	1	2	1	A0A0D2XUU4		0	0	0.002711	49.88	0.00150913	2	1499.73	0.834743	15.0146	0
GVLLYGPPGTGK	2	9	4	A0A0D2XZD6;A0A0D2X8I2;A0A0D2Y8T0;A0A0D2Y496		0	0	0.001693	49.85	0.000948708	2	1158.65	-1.48387	43.8516	0
LPEATAAEVK	1	3	1	A0A0J9WN94		0	0	0.01039	49.82	0.000928184	2	1028.56	2.12862	26.2033	0
YGVVVHQPGHR	3	2	1	A0A0J9UH90		0	0	0.0062	49.81	0.00114188	2	1248.66	-0.73062	17.5275	0
PAYNSVFNNDPNIPR	1	1	1	A0A0D2Y4A3		0	0	0.002658	49.81	0.00195572	2	1717.83	0.468279	47.4195	0
TTPAGGQGANQAIEScAVFVNK	2	2	1	A0A0D2XLD2	C16(Carbamidomethyl)	0	0	1.023e-05	49.78	0.00244108	3	2220.07	-2.42836	43.8327	0
TALASTcLLER	1	2	1	A0A0D2XQF5	C7(Carbamidomethyl)	0	0	0.0005927	49.76	0.00105101	2	1234.65	0.880434	43.215	0
ATSEQVLDQR	1	1	1	A0A0D2XEX4		0	0	0.004939	49.74	0.00120874	2	1146.58	0.538841	22.6784	0
DTIAQAQSGTGK	1	1	1	A0A0D2XU92		0	0	0.0009939	49.72	0.00118925	2	1176.58	-2.85605	14.4821	0
YEEVKDFTDK	2	3	1	A0A0J9WHE4		0	0	0.0008844	49.72	0.00133644	2	1273.6	0.904128	28.3392	1
FMQNPTEHYVDEDTK	1	4	1	A0A0D2XGU4		0	0	0.002485	49.72	0.00191561	3	1853.79	-6.02558	33.8881	0
EANVYGAVLHDDQTGEATQR	1	1	1	A0A0D2XEX4		0	0	1.729e-06	49.72	0.00263129	3	2174.01	0.200271	37.787	0
LLAFFEmLASGK	1	1	1	A0A0D2YG01	M7(Oxidation)	0	0	0.0004961	49.71	0.00113801	2	1342.71	0.690688	52.6321	0
VEILVNDQGNR	1	1	1	A0A0D2XQC1		0	0	0.01151	49.69	0.00108634	2	1256.66	0.444359	33.104	0
LFTSVESQK	1	1	1	A0A0D2XHE4		0	0	0.006269	49.67	0.000834565	2	1038.55	0.858555	29.1825	0
EPSENAEILSR	1	1	1	A0A0D2X990		0	0	0.006059	49.67	0.0012861	2	1244.61	-2.67977	30.176	0
SNQQKPTANTFASVDDQVSALSK	1	1	1	A0A0D2XEX4		0	0	0.001088	49.67	0.0024778	3	2436.2	1.60677	47.2289	0
YGAIPEQEAVIK	1	1	1	A0A0D2XZI9		0	0	0.000796	49.66	0.00113713	2	1317.7	-1.34985	39.8228	0
NSVDNAVPSLALR	1	1	1	A0A0D2XUH4		0	0	0.003279	49.62	0.000899893	2	1355.73	-1.3436	47.2865	0
FIHGMDAVYNDINNWK	1	3	1	A0A0C4DHU4		0	0	0.0001974	49.62	0.00237443	3	1936.9	-2.53392	50.7938	0
DDAGKPYVLPSVR	2	2	1	A0A0J9VPV0		0	0	0.02445	49.61	0.00118858	2	1416.75	3.61545	38.4324	0
TEAYGYAIADATK	1	3	1	A0A0D2XC86		0	0	0.0001823	49.6	0.00148792	2	1373.66	-2.13896	40.9493	0
LGAIVGGQTScK	1	1	1	A0A0D2Y5E3	C11(Carbamidomethyl)	0	0	0.006223	49.56	0.0012538	2	1190.62	-1.26957	24.9888	0
LVSNLANVGDAK	1	1	1	A0A0D2YG02		0	0	0.0007612	49.55	0.00111638	2	1200.66	-1.49881	34.1565	0
VDLGLLQR	1	2	1	A0A0D2XMK8		0	0	0.01034	49.53	0.000608962	2	913.547	0.429462	48.5828	0
cLDDVDDEVR	1	1	1	A0A0D2XI04	C1(Carbamidomethyl)	0	0	0.006042	49.52	0.000997359	2	1235.52	-2.8682	31.9629	0
TNTSVFGSAIK	1	1	1	A0A0D2Y2D2		0	0	0.002195	49.51	0.00101253	2	1124.59	-1.09365	39.1898	0
AAVGSSGSGLLPGAAATTADEAR	1	1	1	A0A0D2Y594		0	0	0.009119	49.49	0.00222503	2	2030.01	-2.86128	43.1428	0
AEFAADEEEVR	1	3	1	A0A0J9VBI1		0	0	0.001912	49.45	0.000989162	2	1265.56	0.281009	30.8462	0
TGPGSQVDSR	1	3	1	A0A0J9VBI1		0	0	0.004708	49.43	0.00082041	2	1003.48	2.83074	11.0424	0
AIAEQAAAcIR	1	3	1	A0A0J9WLE7	C9(Carbamidomethyl)	0	0	0.001528	49.42	0.00126231	2	1173.6	-0.204204	31.4113	0
QDLLSEEERPK	1	2	1	A0A0D2XYM2		0	0	0.000184	49.42	0.00130974	2	1343.68	-1.61883	27.9757	0
GSGLIAGATSR	1	1	1	A0A0D2XEN9		0	0	0.000966	49.41	0.0012131	2	989.538	0.587346	25.9267	0
TPYNITAVEDR	1	1	1	A0A0D2XG82		0	0	0.0006959	49.41	0.00141929	2	1278.63	-0.578614	38.5819	0
LAQAIQILGSGIHR	1	1	1	A0A0D2XIH1		0	0	0.0002933	49.4	0.000240538	3	1476.87	0.685858	49.7327	0
ATIGADFLTR	1	1	1	A0A0J9V4E0		0	0	0.00249	49.39	0.000834906	2	1064.57	1.36906	49.7034	0
IAAQANAAGVVK	1	2	1	A0A0D2XQH9		0	0	0.001625	49.39	0.000528793	2	1112.64	0.730427	23.03	0
LISGSSHPEISAK	1	1	1	A0A0D2XPQ1		0	0	0.002379	49.37	0.000938763	2	1325.71	-0.391765	22.3964	0
TLAcYGDAVVLR	1	1	1	A0A0D2XQV2	C4(Carbamidomethyl)	0	0	0.0005258	49.36	0.00132564	2	1337.69	1.47855	47.7585	0
EMVDNVIDR	1	1	1	A0A0D2X9U0		0	0	0.002651	49.34	0.00113328	2	1090.52	0.46764	35.9485	0
VSKPEDVVDALK	1	1	1	A0A0D2Y5K0		0	0	0.004732	49.32	0.000984134	3	1299.72	5.93082	40.6318	0
VLEQLSGQTPVYSK	1	1	1	A0A0D2X8U8		0	0	0.007396	49.32	0.00121336	2	1548.82	-1.90542	39.3297	0
FFAPLVVAQQLR	1	1	1	A0A0D2XPD2		0	0	0.0004445	49.31	0.000416129	2	1388.81	0.195909	52.143	0
SAALLSSEAGR	1	1	1	A0A0D2XV91		0	0	0.008094	49.29	0.00134306	2	1061.56	-1.93597	27.5797	0
LVNHFVNEFK	3	1	1	A0A0D2XA80		0	0	0.003588	49.29	0.00133246	2	1246.66	-1.21255	39.3231	0
TQPLFVSGGDDYK	1	1	1	A0A0D2XIH4		0	0	0.0001939	49.26	0.00170751	2	1426.68	-1.42454	42.1403	0
AGGVAEGTISYSGDMLRPGK	1	3	1	A0A0J9WHE4		0	0	0.0002407	49.26	0.00251087	3	1965.96	-6.00077	43.7325	0
ARFEELcQDLFR	1	1	1	A0A0D2XA80	C7(Carbamidomethyl)	0	0	0.008919	49.21	0.00195998	3	1583.76	-0.913134	50.5342	1
THIIAHDIGGGIAQR	2	1	1	A0A0D2Y2C2		0	0	0.001879	49.15	0.00112619	2	1558.85	0.532076	27.9785	0
DLFQTTDAER	1	1	1	A0A0D2X8P7		0	0	0.01962	49.14	0.00131163	2	1195.56	-0.615748	39.984	0
ATTAATEQEQAK	1	1	1	A0A0D2XX62		0	0	0.0005548	49.13	0.00132687	2	1248.61	-0.549949	8.95497	0
AGIYLEDLYVR	1	1	1	A0A0D2Y557		0	0	0.002147	49.13	0.00104158	2	1311.7	0.939958	51.2847	0
YSQEDEVYK	1	2	1	A0A0J9U6V5		0	0	0.004137	49.12	0.000974182	2	1160.51	-0.0738075	22.0891	0
DHcLVAGEYQR	2	1	1	A0A0J9UMZ4	C3(Carbamidomethyl)	0	0	0.01687	49.12	0.00159445	3	1347.61	-1.19889	24.9777	0
ADIcEILELFTVK	1	2	1	A0A0J9UC68	C4(Carbamidomethyl)	0	0	0.002848	49.12	0.00144872	2	1550.81	0.779954	54.043	0
SESEYQTLQK	1	4	1	A0A0J9WR11		0	0	0.003769	49.09	0.00141869	2	1212.58	2.08525	22.2194	0
NYETLSATVDGIR	1	1	1	A0A0D2XLR8		0	0	0.009285	49.09	0.00174608	2	1438.72	4.94294	49.1211	0
RQEVLSQLENYEQATAK	1	1	1	A0A0D2XUX6		0	0	3.215e-05	49.08	0.00210482	3	2007.02	1.4717	48.2914	1
GPHTTTSGLEVTWTSTPVK	1	1	1	A0A0D2Y7J6		0	0	6.731e-05	49.04	0.00212492	3	1999.01	0.145365	44.6966	0
HMGLTEHASR	1	1	1	A0A0D2XQN4		0	0	0.000265	49	0.00153967	2	1138.54	-0.721858	11.8398	0
DVLEWTNAR	1	1	1	A0A0D2XEN9		0	0	0.0111	48.97	0.00133927	2	1103.55	-0.137863	48.3149	0
LGPFLPQLLQAVANR	2	1	1	A0A0J9V7M7		0	0	1.472e-05	48.96	0.000268091	2	1636.95	-0.524788	53.0578	0
LPEDIADR	1	2	1	A0A0D2XBZ5		0	0	0.004461	48.95	0.000694059	2	928.473	-0.125006	28.3885	0
NVFDDIISGK	1	1	1	A0A0D2XUI6		0	0	0.003908	48.93	0.00132096	2	1107.57	-1.50551	51.4452	0
VQAGQTAVVDcK	1	1	1	A0A0D2XER4	C11(Carbamidomethyl)	0	0	0.001272	48.93	0.00162929	2	1275.64	0.711221	19.0495	0
IEASDKETLTAEIDK	2	1	1	A0A0D2XA80		0	0	0.02059	48.92	0.0019812	2	1662.84	-2.72341	34.9393	1
LNWASGGGLVDR	1	2	1	A0A0D2XXP3		0	0	0.0003466	48.9	0.00156393	2	1244.64	-2.29603	48.5222	0
IASVQFENWSGSK	1	2	1	A0A0D2YAE2		0	0	0.00138	48.9	0.00211144	2	1452.71	-1.1707	47.9938	0
IGILGLNGAGK	2	3	1	A0A0J9V792		0	0	0.002492	48.89	0.000552642	2	1012.61	-5.64953	49.4115	0
EWLNEVAEQAK	1	1	1	A0A0D2X9K1		0	0	0.001025	48.87	0.00182319	2	1316.65	-1.52322	48.2789	0
YVAAPGGSQNDAAVFDTAEK	1	2	1	A0A0D2X961		0	0	0.003447	48.87	0.00292125	2	2010.93	-4.09999	41.5233	0
VAGNWGPNATFR	1	2	1	A0A0J9V258		0	0	0.003096	48.85	0.00164394	2	1289.64	0.462498	42.1055	0
AFYAQLGK	1	1	1	A0A0D2XKD9		0	0	0.01432	48.84	0.000550551	2	897.482	-0.492295	37.0643	0
LGGELTVDER	2	3	1	A0A0J9U6T0		0	0	0.002363	48.83	0.00149836	2	1088.55	-5.62185	32.1324	0
SQHVTSIQFLAK	1	1	1	A0A0J9WN67		0	0	0.01427	48.83	0.00138381	2	1358.74	-2.78354	39.4803	0
LEFAVYPAPR	1	2	1	A0A0D2X9U0		0	0	0.003898	48.82	0.00116917	2	1162.62	-2.13038	50.0006	0
DVVGIAETGSGK	1	5	1	A0A0J9WR07		0	0	0.0002774	48.79	0.00154658	2	1132.58	-0.746556	31.3692	0
TVAALASTSPEANK	1	2	1	A0A0D2X916		0	0	0.0008995	48.78	0.00170178	2	1359.71	-0.0205338	27.566	0
IVEGEDmPQVQDR	1	1	1	A0A0D2XDN9	M7(Oxidation)	0	0	0.007913	48.75	0.00218564	2	1531.71	-0.271877	22.6531	0
AAELLGLVPVFPVR	1	2	1	A0A0J9WKX2		0	0	0.001688	48.74	0.000155713	2	1480.89	0.341994	52.888	0
VVLENAIVR	1	1	1	A0A0D2XI04		0	0	0.007507	48.69	0.00040427	2	1012.61	-0.395721	40.2687	0
EITALAPSSMK	1	1	1	A0A2C8D194		0	0	0.001069	48.68	0.00134841	2	1147.6	-0.0806624	37.8498	0
HLGLDEHANR	2	1	1	A0A0D2XXN9		0	0	0.00257	48.68	0.00147648	3	1161.58	-0.603319	15.1052	0
AVSLEATDYAVR	1	1	1	A0A0D2XQG2		0	0	0.0005136	48.68	0.00181392	2	1294.66	-0.146357	41.7387	0
GEIEQPSSLDDLNR	1	2	1	A0A0D2XZ52		0	0	5.613e-05	48.68	0.00221912	2	1572.75	0.211419	40.21	0
EGAIIVEK	1	2	1	A0A0D2Y544		0	0	0.0209	48.67	0.00172574	2	858.492	-1.71873	24.7901	0
VVSPITAEGEGSGK	1	2	1	A0A0D2XHU3		0	0	0.001608	48.67	0.00190436	2	1330.69	0.200621	28.3145	0
AVILVGGPSR	1	1	1	A0A0D2XR18		0	0	0.01484	48.66	0.000251867	2	968.588	-0.323935	35.1645	0
LVTLDPAVFIPR	1	1	1	A0A0D2XUH4		0	0	0.002706	48.66	0.0005085	2	1340.79	-1.89142	52.3039	0
AGQEcEESLEK	1	2	1	A0A0D2XIG3	C5(Carbamidomethyl)	0	0	0.0103	48.65	0.00118105	2	1279.55	1.45559	16.8782	0
VAGAIcQTALYDYR	1	1	1	A0A0D2XDN8	C6(Carbamidomethyl)	0	0	0.0006116	48.65	0.00225224	2	1600.78	2.28826	46.8295	0
TNELAAGMEDK	1	1	1	A0A0D2Y1Z2		0	0	0.0003807	48.64	0.00132533	2	1178.54	-0.652948	28.2268	0
AVAVVIDPIQSVK	1	2	1	A0A0J9WGU0		0	0	0.001341	48.6	0.000296092	2	1338.8	-2.88738	50.3112	0
VTEGPEAEDDESKAPDEK	1	1	1	A0A0D2X9R6		0	0	5.667e-05	48.6	0.00268761	3	1945.85	-0.295149	17.0535	1
ADRDESSPYAAmLAAQDVAAR	1	2	1	A0A0D2Y2S1	M12(Oxidation)	0	0	2.16e-05	48.59	0.00351149	3	2224.03	0.382462	40.5646	1
cTcHGSTYEIAR	2	3	1	A0A0J9WHE4	C1(Carbamidomethyl); C3(Carbamidomethyl)	0	0	0.0002032	48.54	0.00139609	3	1454.61	-0.54743	18.6257	0
EQNPDEVTR	1	2	1	A0A0J9WNE3		0	0	0.01559	48.51	0.00148539	2	1087.5	-2.11328	12.9461	0
LGINYQKPmAVPAAPEAGGLAPVK	1	2	1	A0A0D2X9U0	M9(Oxidation)	0	0	0.0002949	48.51	0.000994253	3	2408.3	0.273825	45.8322	0
ITTEDPAK	3	3	1	A0A0J9WHE4		0	0	0.01893	48.5	0.00158416	2	874.453	1.9148	13.4066	0
aSPVASAALK	1	1	1	A0A0D2XG82	N-Term(Acetyl)	0	0	0.002468	48.5	0.00074017	2	956.54	-0.947721	38.9776	0
IQGASLNYR	1	2	1	A0A0J9UEN2		0	0	0.01083	48.48	0.00109055	2	1021.54	0.335746	28.5654	0
TLEENDAmK	1	2	1	A0A0J9WFZ0	M8(Oxidation)	0	0	0.01312	48.45	0.000880199	2	1066.47	0.380205	11.3939	0
QDLPNAMNAAEITDK	1	1	1	A0A0D2X919		0	0	9.902e-05	48.43	0.00250636	2	1630.77	-1.86141	44.9075	0
ASHISATLPIAPTDIAVK	2	1	1	A0A0D2XHU2		0	0	1.257e-05	48.42	0.000615806	2	1805.01	-1.10425	49.7913	0
TcGGVFIR	1	4	1	A0A0J9VNC2	C2(Carbamidomethyl)	0	0	0.009776	48.41	0.00120345	2	909.459	-2.86061	32.124	0
SGSIAELPDQATGSLQR	1	2	1	A0A0D2YGM3		0	0	0.0009777	48.41	0.00225547	2	1729.87	0.792604	43.9634	0
QGYAGTDEELGVYSPQR	1	1	1	A0A0D2X887		0	0	0.01211	48.39	0.00287799	2	1869.86	-3.28319	42.0797	0
YTNPLLIQSIIPLK	1	1	1	A0A0D2Y438		0	0	0.001956	48.38	0.000185144	2	1612.97	-0.894866	52.4777	0
VYAAGLcGSELHIYR	1	2	1	A0A0D2XZU6	C7(Carbamidomethyl)	0	0	5.204e-05	48.37	0.00244372	3	1708.85	1.33562	46.5844	0
VDAVVQNIK	1	2	1	A0A0J9VII7		0	0	0.0016	48.28	0.00113897	2	985.567	-0.480935	28.1072	0
LGSTAPNFQAETTK	1	1	1	A0A0D2YGI9		0	0	0.0003314	48.26	0.00210335	2	1464.72	-6.58629	31.4127	0
EAAVDLAR	1	3	1	A0A0J9VBI1		0	0	0.006237	48.23	0.0015798	2	844.451	-1.13532	24.1898	0
AGSNDLEANNR	1	3	1	A0A0J9V214		0	0	0.001905	48.2	0.00143864	2	1160.53	-0.850931	12.7128	0
TIQFVDWcPTGFK	1	1	1	A0A0D2XAP0	C8(Carbamidomethyl)	0	0	0.0007419	48.18	0.0026085	2	1598.76	-1.59452	51.598	0
VADGLVSR	1	1	1	A0A0D2XVR8		0	0	0.01037	48.16	0.00226156	2	816.458	0.976433	22.4683	0
LASVVSEHDAK	1	1	1	A0A0D2XC33		0	0	0.0006061	48.15	0.00107712	2	1155.6	1.82187	17.0675	0
TTHGLQETNDR	2	2	1	A0A0J9ULS2		0	0	0.009024	48.14	0.00198426	2	1271.6	0.151423	9.8048	0
ETNEWLDEHGADATAEDFEEQKEK	1	1	1	A0A0D2XQC1		0	0	0.0001001	48.13	0.00476443	3	2821.2	-2.48895	44.5185	1
HLDSPPTAK	1	1	1	A0A0D2X9K0		0	0	0.003655	48.11	0.00134051	2	965.505	0.38159	11.5031	0
LWNTLGDcK	2	1	1	A0A0C4DHS7	C8(Carbamidomethyl)	0	0	0.01312	48.11	0.00140309	2	1106.53	-1.21393	40.0703	0
EYEEVLAR	1	2	1	A0A0D2XD82		0	0	0.02286	48.1	0.00140633	2	1008.5	1.80579	31.1141	0
VVVPQALR	1	1	1	A0A0D2XKG8		0	0	0.02571	48.06	0.000108639	2	881.557	-0.221366	35.8945	0
YYSVYDLGK	1	1	1	A0A0D2Y8U6		0	0	0.002987	48.05	0.00155422	2	1107.54	0.754216	46.7436	0
IETAIFDTLAEGK	1	1	1	A0A0D2XQN4		0	0	0.003103	48.03	0.00193049	3	1407.73	-1.27466	51.1397	0
IYAAVDGNLEEGK	1	1	1	A0A0D2Y4W9		0	0	0.003506	48.02	0.0020998	2	1378.68	-0.950146	36.5698	0
QGAEVYQALK	1	2	1	A0A0D2X829		0	0	0.002803	47.96	0.00153318	2	1106.58	-1.37737	32.4545	0
NQAEVTLDDNSK	1	1	1	A0A0C4DHU2		0	0	0.00165	47.96	0.00190667	2	1333.62	-2.45402	22.9927	0
VPIPSYLFAVASGDIATAPIGPR	1	3	1	A0A0D2XMP0		0	0	6.448e-05	47.95	0.000937899	3	2312.26	-0.722878	53.0606	0
QFNGLVDVYK	1	1	1	A0A0D2XUS2		0	0	0.00187	47.93	0.00124745	2	1182.62	1.55908	49.4076	0
DSHILANGVDSK	2	1	1	A0A0D2XDE8		0	0	0.002932	47.93	0.00170245	3	1255.63	0.0154778	22.7269	0
IAQVLEVVEK	1	1	1	A0A0D2Y9E9		0	0	0.004146	47.92	0.000906462	2	1127.67	0.910835	46.3298	0
LADFAAAVSSGEQK	1	1	1	A0A0D2XX10		0	0	0.0001171	47.91	0.00222971	2	1393.7	1.12937	42.6548	0
QAAVSVVPTASSLIIK	2	1	1	A0A0D2XJV1		0	0	3.579e-06	47.89	0.00037794	2	1583.93	-1.66148	50.7248	0
GSHDENSQQNR	1	2	1	A0A0J9UWC7		0	0	0.0008069	47.87	0.00147628	2	1271.54	5.34855	4.49588	0
TGQFGWSANMER	1	2	1	A0A0D2XK76		0	0	0.0008583	47.87	0.00185678	2	1383.61	-0.845918	44.9924	0
ASSSVALHR	2	1	1	A0A0D2Y8T0		0	0	0.006493	47.86	0.000692373	2	927.5	-0.82563	12.1159	0
NDQPSASGVNVGDK	1	1	1	A0A0D2XWY5		0	0	0.008208	47.86	0.00218106	2	1387.64	-1.18563	19.883	0
TPPGAAIIIALLNK	1	1	1	A0A0D2XQ11		0	0	0.01044	47.83	4.53245e-05	2	1391.87	4.3613	53.3374	0
DNFDLRPGVIVR	2	2	1	A0A0D2X9R5		0	0	0.01482	47.83	0.0015501	2	1400.77	1.23622	47.217	0
NVSVAGDPPVVGK	1	1	1	A0A0D2XUH4		0	0	0.01498	47.82	0.0010713	2	1238.67	-0.10138	30.8113	0
IGLFGGAGVGK	1	1	1	A0A0D2YC97		0	0	0.0007492	47.79	0.000821726	2	975.563	1.16937	48.7841	0
YTEAEAEALcK	1	2	1	A0A0D2XLD2	C10(Carbamidomethyl)	0	0	0.0007433	47.79	0.00184306	2	1284.58	2.46216	30.2097	0
AYLPILESFGFNGDLR	1	2	1	A0A0J9UYI6		0	0	0.004822	47.78	0.00244669	3	1811.93	-3.72134	53.2594	0
IANDESTK	1	2	1	A0A0D2XWB2		0	0	0.0178	47.71	0.00115554	2	877.426	-0.482646	8.01583	0
AEYQEYGPSIVR	1	2	1	A0A0J9VQJ0		0	0	0.0004387	47.7	0.00252529	2	1411.68	-0.196345	40.2074	0
HLLPLTNNDNVVAR	2	2	1	A0A0J9ULC8		0	0	0.00413	47.7	0.00135775	2	1575.86	-0.280793	40.6973	0
DcGVGDEVR	1	1	1	A0A0D2XR18	C2(Carbamidomethyl)	0	0	0.01118	47.66	0.0013206	2	1006.43	-0.793773	19.2589	0
LEDDGSIK	1	2	1	A0A0D2Y302		0	0	0.0207	47.65	0.00120511	2	876.431	0.0051366	16.5241	0
NEEKEWQPVTK	1	1	1	A0A0D2Y4M4		0	0	0.003515	47.65	0.00237071	2	1387.69	1.98501	23.2724	1
LSSAFESGR	1	1	1	A0A0D2XGL4		0	0	0.01515	47.63	0.00213055	2	953.467	-1.9149	24.3091	0
NNPVLIGEPGVGK	1	1	1	A0A0D2XZI9		0	0	0.0004989	47.61	0.0012258	2	1293.72	-0.918194	39.5389	0
AILKPVAEILNK	1	1	1	A0A0D2XIF6		0	0	0.003501	47.57	0.000107616	3	1308.83	0.228997	49.734	0
VVETAGNSPGPVISQLK	1	1	1	A0A0D2XH34		0	0	0.0003389	47.55	0.00118132	2	1695.93	2.08655	42.3906	0
IIDNcGVAIAERPAGDFGTR	1	1	1	A0A0D2XVS0	C5(Carbamidomethyl)	0	0	0.0001907	47.54	0.0037301	3	2132.05	-1.76609	43.2806	0
FGATHFVNPTELGDQSIQDK	1	3	1	A0A0D2XMM8		0	0	1.327e-05	47.52	0.00430845	3	2204.06	-2.08032	48.4586	0
TAAAVTSEAPVLVSNLLR	1	1	1	A0A0D2Y128		0	0	2.779e-05	47.51	0.000747821	3	1812.02	-0.378321	52.1262	0
FWSSNEIAVR	1	1	1	A0A0D2XQV2		0	0	0.001581	47.5	0.00204591	2	1208.61	0.6915	46.19	0
LVLTSPAcTNIGEK	1	1	1	A0A0D2XDK3	C8(Carbamidomethyl)	0	0	0.002865	47.47	0.00223736	2	1502.79	-0.485794	41.7429	0
ALNDVPGLK	1	1	1	A0A0D2Y552		0	0	0.01892	47.46	0.000551881	2	926.531	0.477219	37.1037	0
APSTTSDAATR	1	1	1	A0A0D2XA47		0	0	0.002103	47.44	0.00158035	2	1077.52	0.449574	9.01335	0
ATYVEIYNEQLR	1	3	1	A0A0D2Y415		0	0	0.01531	47.43	0.00255263	2	1498.75	-2.41782	48.6791	0
VEAVDTPYFIDNK	1	1	1	A0A0D2X9K1		0	0	0.003253	47.43	0.00295473	2	1510.74	-2.57378	49.3155	0
DYAGAIDAAER	1	1	1	A0A0D2Y594		0	0	0.008895	47.42	0.00166915	2	1151.53	1.02632	34.8805	0
AVANSTTANFIR	1	1	1	A0A0D2Y8T0		0	0	0.0009416	47.41	0.00172111	2	1264.67	3.4709	35.3859	0
VIAPGLDPANcSVVR	1	2	1	A0A0D2XVP9	C11(Carbamidomethyl)	0	0	0.002872	47.39	0.00198531	2	1567.82	-1.06186	45.4401	0
VGEQFTAmFR	1	2	1	A0A0C4DHT3	M8(Oxidation)	0	0	0.007698	47.36	0.00202662	2	1201.57	0.48957	44.3106	0
ADLTQQEDNKR	1	1	1	A0A0D2Y4H4		0	0	0.01903	47.36	0.00246096	3	1317.64	0.892732	10.9757	1
EVIELGLK	1	1	1	A0A0D2Y496		0	0	0.01439	47.35	0.0016659	2	900.54	-0.501793	46.2941	0
SVEmHHEQLTEGQPGDNVGFNVK	2	2	1	A0A2C8D0A4	M4(Oxidation)	0	0	7.518e-06	47.34	0.00551291	3	2568.16	-8.11063	33.8235	0
NDMVQFFGER	1	1	1	A0A0D2Y8Z1		0	0	0.003811	47.28	0.00177995	2	1242.55	-1.82854	50.6857	0
FPTPVSHADDLTGR	1	2	2	A0A0D2XDB8;A0A0J9WHK7		0	0	0.0001755	47.28	0.0028107	3	1512.74	-1.32882	36.8338	0
AVGIQTDIDQAAK	1	2	1	A0A0J9UEK6		0	0	0.001569	47.27	0.00224156	2	1329.7	-0.984238	36.9683	0
VVDSASEEAAR	1	1	1	A0A0D2XUZ6		0	0	0.01314	47.24	0.00179265	2	1133.54	-0.743891	13.5911	0
IGVLEQDEDKGGR	1	1	1	A0A0D2Y2F8		0	0	0.0004022	47.22	0.00241735	3	1415.71	-1.6759	24.346	1
APTDDDDEDAESDIEER	1	2	1	A0A0J9WH36		0	0	0.003838	47.22	0.00195361	2	1921.74	-0.626055	29.5878	0
GYSSPIVALR	1	1	1	A0A0D2Y4W9		0	0	0.008322	47.2	0.00114899	2	1062.6	0.712409	45.2695	0
HTTDTGALQK	1	1	1	A0A0D2X830		0	0	0.0005857	47.2	0.00156438	2	1071.54	-0.0532144	9.1711	0
LIGWYHTGPK	1	2	1	A0A0D2Y8P6		0	0	0.005488	47.2	0.00175017	3	1171.63	-0.34088	38.2148	0
ATYASATPENMNK	1	1	1	A0A0D2X891		0	0	0.007386	47.15	0.00254722	2	1397.64	1.24636	23.1286	0
TGDGYEEAR	1	1	1	A0A0D2XNG7		0	0	0.001266	47.1	0.00119233	2	997.423	0.729742	12.9611	0
EASYVNIPVIALADTDSPTEYVDVAIPTNNK	1	1	1	A0A0D2Y970		0	0	1.371e-05	47.1	0.00456654	3	3319.66	-0.872002	52.4763	0
SSIIcTIGPK	1	2	1	A0A0D2YGK4	C5(Carbamidomethyl)	0	0	0.00353	47.09	0.0018019	2	1075.58	1.18823	39.6324	0
SPGSASVQVR	1	3	1	A0A0J9WN41		0	0	0.001377	47.05	0.00218347	2	987.521	-1.1684	16.3102	0
AQGLAIFTTLR	1	1	1	A0A0D2Y402		0	0	0.001752	47	0.000816062	2	1190.69	-1.42246	51.5648	0
SITIITSPYHLGIR	1	1	1	A0A0D2Y4H6		0	0	0.0005992	46.96	0.000918258	3	1570.9	0.0614454	50.3671	0
QVQEVHAEAR	1	1	1	A0A0D2XHQ8		0	0	0.01023	46.93	0.00218686	2	1166.59	0.875589	10.2218	0
QALLNAQIQAR	1	1	1	A0A0D2XVR8		0	0	0.0005481	46.89	0.000762301	2	1225.71	3.89891	37.2478	0
YSLKPVVPELEK	3	3	1	A0A0D2Y5W3		0	0	0.002072	46.89	0.00110508	3	1401.8	0.0078309	45.8915	0
cVGDGELAYR	1	1	1	A0A0D2XJU9	C1(Carbamidomethyl)	0	0	0.006198	46.86	0.00218324	2	1139.51	-1.0476	31.1613	0
IEGLNLIIVR	1	2	1	A0A0J9U6V5		0	0	0.002757	46.86	0.000208124	2	1139.71	-0.395101	51.6395	0
VIAVAYHPSNNELVR	2	1	1	A0A0D2XAN2		0	0	0.008324	46.86	0.00200087	2	1681.9	-1.12802	38.3075	0
VIVVcSAR	1	1	1	A0A0J9UDK2	C5(Carbamidomethyl)	0	0	0.01238	46.85	0.00184748	2	903.509	0.888089	24.112	0
ALILFPIQK	1	1	1	A0A0D2XVA7		0	0	0.02045	46.85	0.000238551	2	1042.67	0.546872	51.6621	0
LSQLVETISK	1	1	1	A0A0D2XWL5		0	0	0.004425	46.84	0.000998843	2	1117.65	-0.393396	40.3611	0
LLPVYEQILTQLK	2	1	1	A0A0D2Y8Z1		0	0	0.0007684	46.83	0.000377634	3	1557.93	-0.0573549	52.6906	0
SEEGQNTEEYWENIK	1	1	1	A0A0D2X8S7		0	0	0.0007542	46.81	0.00364369	2	1855.8	-0.393588	47.1896	0
KLYDIDcVK	1	2	1	A0A0D2Y2M4	C7(Carbamidomethyl)	0	0	0.02169	46.78	0.00223957	2	1153.59	1.15999	32.794	1
VFVSAYSHELK	2	2	1	A0A0J9USN5		0	0	0.0008592	46.75	0.00239564	2	1279.67	1.23003	35.2295	0
IIEEAPVTIAKPDTFK	1	1	1	A0A0D2XEN9		0	0	0.0005946	46.75	0.00136214	3	1771.98	0.0935573	44.2779	0
LLIVYQNR	1	1	1	A0A0D2XKD9		0	0	0.01721	46.74	0.000552892	2	1018.6	0.176242	41.3944	0
TLTFATIAQETK	1	1	1	A0A0D2XIF7		0	0	0.001009	46.74	0.00172435	2	1323.71	-0.56056	50.3151	0
EVTQAYEILSDEQK	1	2	1	A0A0J9WR11		0	0	0.0001132	46.74	0.00363193	2	1652.8	0.374063	47.8246	0
KLSETVLSK	1	4	1	A0A0D2XN20		0	0	0.004289	46.73	0.000528688	2	1004.6	0.242138	21.6357	1
AQPSLASQQPK	2	1	1	A0A0D2XEN9		0	0	0.004157	46.73	0.00141196	2	1154.62	-1.12713	17.9224	0
DVGMMQLFNSLER	1	1	1	A0A0D2XLD1		0	0	0.0001005	46.73	0.00333774	2	1539.73	-0.847089	52.7977	0
INEPQDNSNER	1	2	1	A0A0D2X8X3		0	0	0.0241	46.72	0.00216432	2	1315.59	-0.667322	12.6861	0
IDLSSPGR	1	1	1	A0A0D2X8P7		0	0	0.01148	46.71	0.0022141	2	844.453	0.828025	26.7515	0
YITQSGDIAVR	1	1	1	A0A0D2XYG9		0	0	0.001523	46.71	0.00225569	2	1222.64	-2.83284	32.4245	0
NLQYYDISAK	1	1	1	A0A0D2X8T7		0	0	0.004176	46.7	0.002402	2	1214.6	-0.745637	40.5541	0
YAHTHQSNPDFIK	2	1	1	A0A0D2Y5K0		0	0	0.001139	46.69	0.00337612	2	1557.74	-0.122617	20.26	0
DADIIVIPAGIPR	1	4	1	A0A0J9VGT0		0	0	0.001045	46.67	0.000708265	2	1349.78	-1.41374	51.406	0
HFNNAHGVNVPR	1	4	1	A0A0D2X9H2		0	0	0.008528	46.65	0.00286236	3	1361.68	0.203377	18.2545	0
DLKPSNILVNENcDLK	1	2	1	A0A0J9WLM8	C13(Carbamidomethyl)	0	0	0.0003558	46.65	0.00359228	3	1871.95	-0.557018	46.1971	0
YIDLVIPR	1	1	1	A0A0D2XMV7		0	0	0.02387	46.64	0.000999312	2	988.581	-1.29971	50.7273	0
VPGGEIEDSR	1	2	1	A0A0D2XUN7		0	0	0.0174	46.63	0.00173164	2	1058.51	2.01607	21.0943	0
GTAFIEQEGLR	1	4	1	A0A0D2XHA3		0	0	0.001466	46.62	0.00245755	2	1220.62	-1.83336	40.8862	0
TLFGVTTLDVVR	1	2	1	A0A0D2Y2C5		0	0	0.008037	46.62	0.00102352	2	1320.75	-1.75338	51.6007	0
sSWEPAPDSLQQLAAcLK	1	1	1	A0A0D2XK12	N-Term(Acetyl); C16(Carbamidomethyl)	0	0	0.0006416	46.61	0.00447132	2	2042.99	0.247223	52.8664	0
SGNYSLGLDK	1	1	1	A0A0D2XM73		0	0	0.006294	46.58	0.00304843	2	1053.52	-2.76713	33.7802	0
SYTPYSDGSDcGR	1	1	1	A0A0C4DHR8	C11(Carbamidomethyl)	0	0	0.007171	46.54	0.0016337	2	1464.57	-0.42195	24.0528	0
KEAAPAAEAAPASDEAPAAPK	1	1	1	A0A0D2XC69		0	0	0.009845	46.54	0.00412474	3	1962.97	-1.02633	22.0972	1
mVTDPTPYNDK	1	1	1	A0A0D2XQN4	M1(Oxidation)	0	0	0.0008664	46.53	0.00245676	2	1296.58	1.12053	21.795	0
APVSFPGGTIEENER	1	1	1	A0A0D2XQV2		0	0	0.001061	46.52	0.00375714	2	1602.77	-1.58991	43.3458	0
VVHQQDAVGLK	1	1	1	A0A0D2Y9B3		0	0	0.0008881	46.51	0.00131892	2	1193.66	0.402851	17.2818	0
LAEQAGVEK	1	2	1	A0A0D2XU68		0	0	0.01344	46.5	0.00247826	2	944.504	-0.886657	14.0478	0
FDAQTGADR	1	1	1	A0A0D2Y8T0		0	0	0.009884	46.5	0.00142495	2	980.442	-0.775011	15.4873	0
IEDDLLIGSAK	1	1	1	A0A0D2XAU1		0	0	0.0004789	46.49	0.00248398	2	1173.64	0.576941	46.335	0
FLTALQGAGGK	1	1	1	A0A0D2XMU1		0	0	0.0006783	46.48	0.00157096	2	1062.59	-1.25937	38.9898	0
FVcDSSVERPNANLSFETWHR	2	2	1	A0A0D2Y050	C3(Carbamidomethyl)	0	0	0.0005703	46.46	0.00687659	3	2551.19	3.68181	47.541	0
IIAETGAGQHGVATATVcAK	1	1	1	A0A0D2Y8Q2	C18(Carbamidomethyl)	0	0	0.0002596	46.44	0.00324591	3	1955	1.54807	27.8892	0
TVDLLGIAK	1	3	1	A0A0J9WHE4		0	0	0.008751	46.38	0.0013521	2	929.567	-0.0261905	50.2956	0
LLPILATSETLVR	1	1	1	A0A0D2XI90		0	0	7.754e-05	46.37	0.000408294	2	1425.87	-1.37679	52.115	0
IFEIEGETQR	1	1	1	A0A0D2XPT3		0	0	0.0206	46.36	0.00274789	2	1221.61	-0.733687	40.3681	0
VFATTPAIIEK	1	2	1	A0A0J9ULB1		0	0	0.01012	46.35	0.00100923	2	1189.68	-1.20981	43.8902	0
AQIWDTAGQER	1	2	1	A0A0J9VWY5		0	0	0.01951	46.34	0.00283025	2	1274.61	-1.89733	36.1675	0
GAHLLGEELYNK	1	2	1	A0A0J9UZN4		0	0	0.006599	46.34	0.00250391	2	1343.7	2.66496	39.0212	0
SENLQDLIR	1	7	1	A0A0J9UCF2		0	0	0.006777	46.33	0.00283911	2	1087.57	-0.893286	48.6142	0
HGGVDAmSADDLK	1	2	2	A0A0D2XDB8;A0A0J9WHK7	M7(Oxidation)	0	0	0.02115	46.29	0.00265156	2	1331.59	-1.86281	18.6299	0
IPNSTEISR	1	1	1	A0A0D2Y2D5		0	0	0.003131	46.28	0.00259291	2	1016.54	1.03614	22.1998	0
ISAVQDIIPALEVSTQQR	2	2	1	A0A0D2XVI4		0	0	5.112e-06	46.27	0.00162401	2	1968.08	-0.322268	51.7673	0
LLAVPVVR	1	1	1	A0A0D2XWU1		0	0	0.02474	46.23	2.62055e-05	2	866.583	0.92791	46.3285	0
LYDETTGDKPQK	1	2	1	A0A0D2XXG3		0	0	0.009107	46.22	0.00355664	2	1394.68	0.266785	14.4452	0
AYNEADRPIVLDPVGAGATTVR	1	1	1	A0A0D2XE22		0	0	2.987e-05	46.21	0.00317473	3	2285.19	2.27921	48.0269	0
VVITADESQR	1	2	1	A0A0J9WQG8		0	0	0.007129	46.19	0.00279507	2	1117.58	-0.0598651	22.0145	0
SITIEEYANSPENVQER	1	2	1	A0A0J9UJA4		0	0	0.01113	46.17	0.00545049	2	1978.93	-4.48329	44.0937	0
ITPSTSENDIK	1	1	1	A0A0D2Y0K6		0	0	0.00371	46.16	0.00267161	2	1204.61	4.47299	20.8075	0
KVNLTDPSGAEVK	2	1	1	A0A0D2XZD6		0	0	0.01043	46.14	0.00267056	3	1357.73	-0.268909	25.9579	1
ESLNNDLGTGR	1	1	1	A0A0D2XCS2		0	0	0.0006365	46.13	0.00239149	2	1175.56	-0.458083	25.9593	0
LGFTHPVEEGIPR	1	2	1	A0A0D2XQI1		0	0	0.004192	46.11	0.00279683	3	1451.76	-0.305998	40.7233	0
TTLIANTSNMPVAAR	1	3	1	A0A0D2XD29		0	0	0.00103	46.11	0.0030797	2	1559.81	-5.2362	41.5725	0
YMATcLLYR	1	1	1	A0A0D2XAP0	C5(Carbamidomethyl)	0	0	0.02543	46.09	0.00277037	2	1190.57	-0.877048	49.63	0
ATHTQEVLGEQGR	2	1	1	A0A0D2XZN4		0	0	0.009644	46.08	0.00363741	3	1425.7	-2.25301	17.1657	0
DGLDPIDQYFAmGR	1	1	1	A0A0D2Y8Z1	M12(Oxidation)	0	0	0.0002577	46.08	0.00377427	2	1613.73	-0.244454	51.6646	0
IASQAALK	1	1	1	A0A0D2XXX3		0	0	0.02124	46.07	0.00284495	2	801.483	0.654706	15.8333	0
LLSPDLGGK	1	1	1	A0A0D2Y4W9		0	0	0.006621	46.05	0.00133096	2	899.518	-1.91143	35.129	0
GNVELLTGR	1	1	1	A0A0D2XLD0		0	0	0.01647	46.05	0.00277863	2	958.531	-0.96295	35.4445	0
GGIPFLVTHDAR	2	1	1	A0A0D2XGN9		0	0	0.01279	46.01	0.00176555	2	1282.69	1.55691	48.0557	0
NEDPLAVAGEYGSK	1	2	1	A0A0D2Y2H9		0	0	5.889e-05	45.99	0.00346432	2	1449.68	-2.75445	44.5555	0
AAAATYDR	1	1	1	A0A0D2X8J5		0	0	0.02358	45.96	0.00157051	2	838.405	-0.811798	11.0622	0
YAEADKER	1	1	1	A0A0D2XX39		0	0	0.01806	45.95	0.00247999	2	981.463	-0.28104	8.46721	1
LNQWNSVVR	1	1	1	A0A0D2XWU1		0	0	0.009653	45.91	0.00298121	2	1115.6	-0.0292638	37.9478	0
LVEIVPEDER	1	2	1	A0A0D2XUY6		0	0	0.003227	45.88	0.00211874	2	1198.63	-4.63799	39.4517	0
AGDVIEIVTR	1	3	1	A0A0J9UTC1		0	0	0.001021	45.83	0.00266963	2	1072.6	-1.46296	46.3998	0
LVVEPSAcVPLAVALFDEEFR	2	1	1	A0A0D2XMV9	C8(Carbamidomethyl)	0	0	0.0007206	45.83	0.00429439	3	2361.21	-0.537633	53.685	0
DQLTNQNVAVK	2	2	1	A0A0J9WLM8		0	0	0.002169	45.82	0.00289178	2	1229.65	-0.799224	24.3499	0
FEVPTDGQDVISK	1	3	1	A0A0D2XD29		0	0	0.0001719	45.82	0.00361702	2	1434.71	-0.640285	44.58	0
DLPIQLLLSDEPIK	1	1	1	A0A0D2XQ55		0	0	0.0001774	45.82	0.000809019	2	1593.91	0.125778	53.1651	0
LILVDLHDNK	1	6	1	A0A0J9U710		0	0	0.002927	45.81	0.00101032	3	1179.67	1.00944	42.7594	0
FLADHEDDQR	1	2	1	A0A0D2XAB6		0	0	0.004055	45.81	0.00258879	2	1245.55	-0.216262	17.9639	0
HKDVDLcIIR	1	1	1	A0A0D2XXN9	C7(Carbamidomethyl)	0	0	0.005214	45.81	0.00189337	2	1268.68	-0.672888	32.98	1
FANAENANNFK	1	1	1	A0A0D2Y5H4		0	0	0.0007574	45.8	0.00343118	2	1239.58	1.70129	26.4043	0
NFATVNSTEGR	1	1	1	A0A0D2XV19		0	0	0.01809	45.79	0.00356696	2	1195.57	2.65191	23.9173	0
GPELLSmWFGESESNIR	1	5	1	A0A0D2XZD6	M7(Oxidation)	0	0	0.0002582	45.78	0.00609339	2	1967.91	-2.07782	52.5289	0
EGVPAISGVDTR	1	1	1	A0A0D2XQK3		0	0	0.01476	45.77	0.00288422	2	1200.62	-0.886285	37.1669	0
TFQSVIGNETK	1	1	1	A0A0D2Y8Q2		0	0	0.002647	45.75	0.00341504	2	1223.63	-0.14617	37.3592	0
LVSASGALNTVPEK	1	1	1	A0A0D2XCQ6		0	0	0.009929	45.74	0.00233217	2	1385.76	-0.752315	36.2759	0
LTLHGLQQFYIK	1	4	1	A0A0D2XGU4		0	0	0.002753	45.74	0.00136943	3	1460.82	-0.896833	50.4806	0
DITYFVQSLLR	1	4	1	A0A0J9VQJ0		0	0	0.001505	45.72	0.00203885	2	1354.74	-0.865216	53.9096	0
TLIIWNLTR	1	1	1	A0A0C4DHS7		0	0	0.01385	45.71	0.00126211	2	1129.67	-0.930156	51.8518	0
AIHALGVLISR	1	1	1	A0A0D2XUH4		0	0	0.009364	45.71	0.000192002	3	1149.71	-1.01826	47.0546	0
QNLPQLEGSTIEK	1	4	1	A0A0D2XN20		0	0	0.005771	45.67	0.00296224	2	1456.77	1.63915	39.8875	0
LVGIEFPELIDLPAVSK	1	2	1	A0A0D2YA24		0	0	0.0005606	45.65	0.00103735	2	1840.04	-2.54968	53.0057	0
YTcTFcGK	1	1	1	A0A0D2XDT8	C3(Carbamidomethyl); C6(Carbamidomethyl)	0	0	0.01054	45.64	0.00150367	2	1036.42	-0.621977	23.3712	0
IEEGDYYEAQQQTR	1	1	1	A0A0D2XCG2		0	0	0.01477	45.63	0.004572	2	1729.76	-1.00318	29.4955	0
IATMAGDIALR	1	1	1	A0A0D2Y4W9		0	0	0.0145	45.62	0.0024496	2	1131.63	6.5226	47.3688	0
TLQLGSFFTVGPDEVR	1	1	1	A0A0D2Y1Y9		0	0	0.0008007	45.62	0.00419187	2	1765.91	-2.75168	52.2486	0
VALVFGQmNEPPGAR	1	1	1	A0A0D2YC97	M8(Oxidation)	0	0	0.008648	45.58	0.00409507	2	1601.81	2.01771	44.9512	0
LAWADSGK	1	1	1	A0A0D2XAU1		0	0	0.009413	45.57	0.00256671	2	847.431	-0.0679329	29.7566	0
SFSKPLAPK	1	2	1	A0A0D2XZN1		0	0	0.007447	45.57	0.00157109	3	974.567	-0.252134	19.6021	0
EGPVAEEPMR	1	2	1	A0A0J9UYI6		0	0	0.01984	45.55	0.00264542	2	1114.51	-5.13732	24.4297	0
DFELEETEDEK	1	2	1	A0A0D2XK76		0	0	0.002597	45.54	0.00250631	2	1383.58	-2.02904	39.66	0
EIGIGEIGTVVGR	1	2	1	A0A0J9V2G6		0	0	0.002494	45.53	0.00228677	2	1299.72	-1.81459	50.6922	0
EPYPGGGIYcATK	2	2	1	A0A0D2Y512	C10(Carbamidomethyl)	0	0	0.002684	45.52	0.00370177	2	1412.65	-1.72007	36.0835	0
ATNPLEGITEK	1	6	1	A0A0J9VGT0		0	0	0.00263	45.51	0.00320838	2	1172.62	-0.026475	42.6112	0
EHPTQAFLDLFTIR	2	1	1	A0A0D2XQV2		0	0	0.001079	45.51	0.00360204	3	1687.88	0.206227	52.2216	0
IGLDTLIAR	1	2	1	A0A0D2Y5G5		0	0	0.005515	45.5	0.00168962	2	971.59	1.47186	50.8263	0
LTTDEIEK	1	1	1	A0A0D2XAH7		0	0	0.02212	45.47	0.00254136	2	948.488	-0.590094	22.576	0
NAGEDEVAADQK	1	1	1	A0A0D2X8J5		0	0	0.0006232	45.47	0.00279109	2	1246.55	-0.73223	13.1818	0
TVTWEAGNGK	1	2	1	A0A0D2XUN7		0	0	0.00383	45.45	0.00254453	2	1062.52	-0.430681	25.3666	0
ATAGSLALVTSK	1	1	1	A0A0J9UJA4		0	0	0.0005853	45.45	0.00140413	2	1118.64	-2.04845	36.6426	0
FGIDEATLR	1	2	1	A0A0J9WH31		0	0	0.005362	45.42	0.00247605	2	1021.53	-0.640267	45.3686	0
LAVNmVPFPR	1	3	1	A0A0C4DHT3	M5(Oxidation)	0	0	0.002154	45.42	0.00332006	2	1159.63	-2.08485	48.2803	0
ESQPEIIDSLER	1	1	1	A0A0D2XZI9		0	0	0.0009283	45.42	0.00382675	2	1415.7	0.869496	49.0961	0
DWNEEFQSAK	1	3	1	A0A0J9VBI1		0	0	0.003543	45.4	0.00275569	2	1253.54	-0.372561	42.0069	0
VPLEAEQLDSEVVK	1	2	1	A0A0D2XDP4		0	0	0.001911	45.4	0.00326472	2	1555.82	-3.92468	47.6294	0
LTPEEIER	1	1	1	A0A0D2XQC1		0	0	0.02232	45.39	0.00222871	2	986.515	-0.478612	28.9941	0
SQLSAPSSPETQHIR	2	3	1	A0A0J9W1U0		0	0	0.005901	45.36	0.0045349	2	1637.82	0.244996	25.5814	0
TSILAAANPVYGR	1	1	1	A0A0D2XCS2		0	0	0.001427	45.34	0.00260981	2	1332.73	0.379193	47.7844	0
HAGFVNDK	1	1	1	A0A0D2Y2N3		0	0	0.01306	45.33	0.00166914	2	887.437	0.0315713	11.4576	0
AVVNELVGR	1	1	1	A0A0D2XUU9		0	0	0.02309	45.33	0.00172337	2	956.552	-0.441987	36.6115	0
VVSPWNSEDAK	1	1	1	A0A0D2YH37		0	0	0.004522	45.31	0.00311814	2	1231.59	-7.44736	33.8124	0
DTGVTPAINQVER	1	1	1	A0A0D2Y552		0	0	0.005357	45.31	0.00333014	2	1399.72	-0.750843	35.0385	0
EAQDEYAINSYK	1	2	1	A0A0D2XPN3		0	0	0.001346	45.31	0.00399116	2	1430.64	-1.345	33.0817	0
DAAAAEGILR	1	1	1	A0A0D2XJU6		0	0	0.02106	45.3	0.00276676	2	986.524	-2.91129	36.8958	0
TVTSVDIAPNSGR	1	1	1	A0A0D2X978		0	0	0.007832	45.3	0.00395905	2	1316.68	3.38184	30.3077	0
SIEGVQQWPYK	1	2	1	A0A0D2XUN7		0	0	0.007687	45.27	0.0035972	2	1334.67	-5.83367	46.0875	0
EIPWTGDDAYTK	1	2	1	A0A0D2XZU5		0	0	0.005236	45.27	0.00368784	2	1395.64	0.267049	45.0594	0
ALVEHIHR	1	2	1	A0A0D2XNM2		0	0	0.01453	45.26	0.00229793	3	974.554	1.2653	15.6278	0
ILDEDHHGLK	1	1	1	A0A0D2XX10		0	0	0.001814	45.26	0.00323318	2	1176.6	1.71638	17.2998	0
KLSEADYER	1	1	1	A0A0D2Y973		0	0	0.02253	45.25	0.00358544	2	1110.54	-0.413711	16.9582	1
QQDGSFEAVR	1	1	1	A0A0D2XZ15		0	0	0.003519	45.25	0.00263012	2	1136.53	-1.2912	25.2047	0
AGGVAEGTISYSGDmLRPGK	1	3	1	A0A0J9WHE4	M15(Oxidation)	0	0	5.327e-05	45.24	0.00604437	3	1981.96	-0.0915774	36.1361	0
SDLIEPGLTGEQIQR	1	3	1	A0A0J9UBP2		0	0	0.004457	45.23	0.00360049	2	1655.86	1.95395	46.7534	0
IATmAGDIALR	1	1	1	A0A0D2Y4W9	M4(Oxidation)	0	0	0.00287	45.21	0.00270267	2	1147.61	-0.625168	36.4007	0
VYVGNLSYDVK	1	2	1	A0A0J9V3J9		0	0	0.001718	45.18	0.00310367	2	1256.65	-1.07975	43.9796	0
FADPEVQADmK	1	1	1	A0A0D2XA80	M10(Oxidation)	0	0	0.001908	45.17	0.00284323	2	1266.57	-1.13288	27.1245	0
DcFGVSEETTTGVHHLYR	2	1	1	A0A0D2XZ51	C2(Carbamidomethyl)	0	0	0.0005804	45.15	0.00764036	4	2107.95	0.0440185	39.8508	0
QVLDSIGGVK	1	2	1	A0A0D2Y4A0		0	0	0.003473	45.14	0.00306656	2	1015.58	0.484108	36.7864	0
VYNYNTSEK	1	1	1	A0A0D2XU70		0	0	0.003718	45.12	0.00267159	2	1117.52	-0.111462	18.4979	0
LNNILLIGMTNR	1	1	1	A0A0D2Y968		0	0	0.003474	45.09	0.00217903	2	1371.78	-1.06328	51.5491	0
IETGVIkPGmVVTFAPSNVTTEVK	2	2	1	A0A2C8D0A4	K7(Acetyl); M10(Oxidation)	0	0	4.446e-06	45.08	0.00290587	3	2575.37	-0.296703	49.6629	0
MVELLSESYNPHVR	2	2	1	A0A0D2YGM3		0	0	0.0001029	45.03	0.00540482	3	1673.83	-0.287619	46.6259	0
DAAELTAQLR	1	1	1	A0A0D2XWU0		0	0	0.005278	45.02	0.00370018	2	1087.58	2.12802	40.206	0
LFADYNEAATR	1	3	1	A0A0J9VBI1		0	0	0.0003259	44.97	0.00401527	2	1270.61	-0.129544	37.4567	0
SSLSDVDAQK	1	1	1	A0A0D2Y5R0		0	0	0.02304	44.95	0.00278304	2	1049.51	-0.192007	19.948	0
EAAGSVVDAHSSVK	1	2	1	A0A0D2XYW5		0	0	0.01305	44.94	0.00389081	2	1356.68	0.368267	17.5977	0
VSTEVDAR	2	1	1	J9MJK9		0	0	0.01265	44.93	0.00289229	2	876.441	-0.830006	13.5733	0
VDPNNVAPGVAR	1	3	1	A0A0D2XGL6		0	0	0.01694	44.89	0.0032515	2	1208.64	-0.445451	26.5032	0
LNPGQSISVYELPR	1	2	1	A0A0J9WNS0		0	0	0.0001808	44.88	0.00351744	2	1572.84	0.0578981	50.1926	0
KTGVIVGDDVLR	2	1	1	A0A0D2Y1Y2		0	0	0.004766	44.87	0.00191429	2	1271.74	3.26971	36.4697	1
VTIVGSGNWGSTIAK	1	2	1	A0A0D2XXG3		0	0	0.0004249	44.82	0.00336696	2	1489.8	0.792268	49.2088	0
EVGDGTTSVVLIAAELLR	1	1	1	A0A0D2XWU0		0	0	0.01675	44.8	0.00271362	2	1843.01	-6.27153	53.9068	0
SAELLQTLSK	1	2	1	A0A0D2XQZ1		0	0	0.006001	44.78	0.00226874	2	1089.61	-0.133568	45.2452	0
AILNYHLTR	1	1	1	A0A0D2XUT8		0	0	0.01354	44.78	0.00336651	2	1100.62	0.674592	37.2318	0
GATPSQIGVVLR	1	1	1	A0A0D2XCY5		0	0	0.0008971	44.78	0.00130902	2	1197.7	2.69558	43.3216	0
GSGIVVFESPDDAR	1	4	1	A0A0J9V3J9		0	0	0.001247	44.78	0.00468052	2	1448.7	-0.0660007	47.3605	0
QIISQYcR	1	1	1	A0A0D2XER4	C7(Carbamidomethyl)	0	0	0.01278	44.77	0.00450126	2	1067.53	1.42439	27.2334	0
SSGLAPELPEDLYMLIK	1	1	1	A0A0D2XCY5		0	0	2.103e-05	44.76	0.00441806	2	1875.98	0.662014	52.8906	0
VLHYVEKPESR	2	1	1	A0A0D2XR18		0	0	0.004222	44.75	0.00342167	2	1356.73	-0.249963	16.999	0
YGNFPAQWK	1	1	1	A0A0D2Y4V8		0	0	0.002008	44.74	0.00431087	2	1110.54	0.81398	44.3486	0
DASGEEGDTTAAESGR	2	2	1	A0A0D2XN77		0	0	0.006917	44.73	0.00358553	2	1552.64	2.08315	14.381	0
SSNAQDLQLAGTSFQK	1	1	1	A0A0D2XJW8		0	0	0.006851	44.73	0.00614638	2	1694.83	-1.33959	41.9247	0
APFDLFETK	1	2	1	A0A0D2XK76		0	0	0.005608	44.72	0.00432402	2	1067.54	-1.16428	51.2325	0
TGVIVGDDVLR	1	1	1	A0A0D2Y1Y2		0	0	0.006227	44.72	0.00369836	2	1143.64	-0.207253	45.0769	0
LGTVAEDPVAER	1	1	1	A0A0D2XIL3		0	0	0.001319	44.7	0.00346638	2	1256.65	2.0874	31.179	0
GGPIDQQVDDALDR	1	1	1	J9MJK9		0	0	0.0003924	44.7	0.00536729	2	1498.71	1.05427	45.0511	0
sSNGTQEAPIEVR	1	2	1	A0A0D2Y544	N-Term(Acetyl)	0	0	0.0007761	44.69	0.00490419	2	1429.69	-0.175129	35.6681	0
VDPGVNWGELAR	1	1	1	A0A0D2Y1V9		0	0	0.0004664	44.68	0.0038398	2	1312.66	-2.15791	50.3124	0
SALEEAEKK	1	1	1	A0A0D2XX10		0	0	0.01057	44.65	0.00348938	2	1004.52	-0.966982	13.2874	1
AIDVLAcYR	1	1	1	A0A0D2Y8W3	C7(Carbamidomethyl)	0	0	0.01467	44.64	0.00360564	2	1080.55	2.39225	47.8232	0
ESNVFVIGQDKPWISLPK	2	1	1	A0A0D2XGN9		0	0	5.173e-06	44.63	0.00340562	2	2057.1	-2.83099	51.1869	0
VSGQDVER	1	1	1	A0A0D2YCA1		0	0	0.009989	44.62	0.00243326	2	889.437	-0.486845	10.6573	0
VNDEGVQEAcER	1	1	1	A0A0D2XWV9	C10(Carbamidomethyl)	0	0	0.004271	44.62	0.00423664	2	1405.61	3.34328	18.6116	0
KLDASQASSLDIEK	1	1	1	J9MJK9		0	0	0.01435	44.62	0.00434881	3	1504.78	-0.951366	32.4851	1
ALAGLELNGR	1	1	1	A0A0D2XUI6		0	0	0.004086	44.61	0.00197877	2	1013.57	0.982069	41.9754	0
EAYPGDVFYLHSR	1	2	1	A0A0J9WFZ0		0	0	0.0008156	44.61	0.00564054	2	1553.74	-1.90646	48.8917	0
IDVYFAEATK	1	1	1	A0A0C4DHQ2		0	0	0.002306	44.6	0.00299407	2	1156.59	1.29875	47.3277	0
VTDIETFKK	2	1	1	A0A0D2XCJ5		0	0	0.01283	44.59	0.00197401	2	1080.59	-1.2869	24.5126	1
YPIEHGVVTNWDDmEK	2	1	1	A0A2C8D194	M14(Oxidation)	0	0	0.00299	44.55	0.00745874	2	1948.87	-2.29441	41.9698	0
VVVINGDHPFAGR	2	1	1	A0A0D2XHH7		0	0	0.0005718	44.54	0.00324139	3	1380.74	0.275817	35.8893	0
EDGQEYAQVVK	1	1	1	A0A0D2XGV1		0	0	0.002806	44.52	0.00421701	2	1265.6	0.87311	28.9822	0
EYGVWEPQAIK	1	2	1	A0A0D2XUN7		0	0	0.001802	44.52	0.00427352	2	1319.66	0.502088	49.2156	0
GLVGPIISR	1	2	1	A0A0D2XUM4		0	0	0.007563	44.51	0.000474356	2	911.568	0.309595	42.6522	0
QQILLLAAK	1	1	1	A0A0D2XWQ5		0	0	0.01637	44.51	0.000384087	2	997.643	2.13947	49.023	0
SLEYNSQPDYR	1	1	1	A0A0D2XMW0		0	0	0.009932	44.5	0.00402536	2	1371.61	-2.55176	29.5007	0
SALEEAEK	1	1	1	A0A0D2XX10		0	0	0.01325	44.49	0.00262634	2	876.429	-1.80552	16.0148	0
HDGGFNIVHVK	1	1	1	A0A0D2XGN9		0	0	0.02142	44.49	0.0039564	3	1222.63	0.92707	29.6953	0
KFLDGLYVSEK	1	1	1	A0A0J9U592		0	0	0.0002464	44.49	0.00269391	2	1298.7	2.07786	46.1559	1
AVESGKEEDVPVK	2	1	1	A0A0D2XKD9		0	0	0.01493	44.49	0.0048277	3	1386.7	-6.55531	17.1905	1
TSGHDDNIR	1	1	1	A0A0D2XWJ0		0	0	0.004833	44.48	0.00302449	2	1014.46	0.0564204	8.36409	0
AQEVTPLVQLK	1	1	1	A0A0D2XXJ9		0	0	0.003404	44.47	0.00129333	2	1225.71	-1.18352	45.2859	0
IHFPLVAYAPVISAAK	1	1	1	A0A0D2XAP0		0	0	2.529e-05	44.47	0.00118793	3	1696.98	-0.402427	51.2794	0
DAVYSNmTADDWNASLRPK	1	2	1	A0A1D6QVK6	M7(Oxidation)	0	0	0.0007834	44.47	0.00858884	3	2169.99	2.12721	43.4536	0
AEAVLQEADK	1	1	1	A0A0D2XNN3		0	0	0.002634	44.45	0.00332721	2	1073.54	-3.16558	23.95	0
DAEAVILGTR	1	1	1	A0A0D2XR18		0	0	0.005551	44.44	0.00418029	2	1044.57	0.999748	44.5144	0
VGIITEDEFK	1	4	1	A0A0J9UCJ6		0	0	0.001037	44.42	0.00357976	2	1150.6	0.173356	47.3223	0
QFSSLHSDR	1	1	1	A0A0D2Y4X5		0	0	0.01746	44.41	0.0031008	2	1076.51	0.70748	15.9558	0
LQTYTLDLNK	1	1	1	A0A0D2XZ56		0	0	0.003539	44.38	0.00290162	2	1208.65	1.2003	44.4518	0
WEDIGGLEEVK	1	5	1	A0A0D2XZD6		0	0	0.01581	44.36	0.00443756	2	1274.62	-1.23789	49.9537	0
TQGLPGEGTVSR	1	2	1	A0A0J9VII7		0	0	0.02116	44.35	0.0043376	2	1201.62	1.34877	26.5961	0
VVGQEHYDVATR	2	1	1	A0A0D2YC97		0	0	0.0002943	44.34	0.00503232	2	1373.68	-0.190517	21.0626	0
AYEEGLFEASK	1	2	1	A0A0D2XZ45		0	0	0.002064	44.31	0.00354927	2	1243.58	-0.889276	41.9684	0
SLGVGSLVEK	1	1	1	A0A0D2XMC9		0	0	0.005745	44.3	0.00281252	2	988.567	-0.886552	41.486	0
AcAAQTDATFLK	1	1	1	A0A0D2Y1V9	C2(Carbamidomethyl)	0	0	0.0003234	44.3	0.00517177	2	1296.63	0.538984	36.2159	0
KPAAFISTISDDR	1	1	1	A0A0D2XUT9		0	0	0.01016	44.3	0.00439526	2	1420.74	-1.7548	38.69	0
AINHAGDVAK	1	1	1	A0A0D2YHD4		0	0	0.01325	44.29	0.00297169	2	995.528	0.656089	9.16148	0
STIVGWNSTVGR	1	2	1	A0A0J9UH90		0	0	0.0002239	44.29	0.00392315	2	1276.66	-0.577609	43.2086	0
VDLDTGIIDYDTLQK	1	2	1	A0A0D2XVN0		0	0	4.733e-05	44.28	0.00584323	2	1708.86	-1.70272	50.9375	0
DSTAYALGR	1	1	1	A0A0D2XQA6		0	0	0.01685	44.26	0.00462904	2	953.468	-0.880185	27.6175	0
TPEDNFDLAK	1	1	1	A0A0D2YCC3		0	0	0.002425	44.25	0.00337314	2	1149.54	-0.0151131	36.9279	0
TGLMALPR	1	1	1	A0A0D2XVM0		0	0	0.02262	44.23	0.00474419	2	858.488	1.68134	42.9204	0
IIQFDNHFDR	1	1	1	A0A0D2XKD9		0	0	0.0008724	44.22	0.0048365	3	1304.64	0.0601825	40.7774	0
NTSQVQYGcWLK	1	3	1	A0A0J9UQD6	C9(Carbamidomethyl)	0	0	0.0003717	44.22	0.00555743	2	1483.7	-1.30871	48.5167	0
LIAGGAAQNSAR	1	2	1	A0A0J9WHK1		0	0	0.008167	44.2	0.00335327	2	1128.61	-2.33801	16.3899	0
NVEEVVLLLK	1	1	1	A0A0D2Y1W8		0	0	0.0173	44.2	0.00157969	2	1155.7	-2.42889	51.8178	0
IWHHTFYNELR	6	3	1	A0A2C8D194		0	0	0.01009	44.19	0.00541876	2	1515.75	-2.25378	38.5754	0
VcSGGILGLGETSEDR	1	1	1	A0A0D2XBB4	C2(Carbamidomethyl)	0	0	0.0007921	44.19	0.00621899	2	1649.78	0.851246	48.9625	0
AVFEAPDILLLDEPTNHLDVK	1	1	1	A0A2C8CXF1		0	0	5.669e-07	44.18	0.00496909	3	2349.23	-0.767721	51.8987	0
YLQEVILEDK	1	2	1	A0A0J9ULS2		0	0	0.001988	44.15	0.00329595	2	1249.67	3.83901	47.7777	0
FSEGTSADR	1	2	1	A0A0D2X8I2		0	0	0.01003	44.11	0.00373401	2	969.428	0.851894	13.3819	0
TALTDSDENVR	1	4	1	A0A0D2XNM1		0	0	0.001023	44.06	0.00397749	2	1220.58	1.27857	22.1143	0
VSPFTEHTYEGcR	2	2	1	A0A0J9ULC8	C12(Carbamidomethyl)	0	0	0.001259	44.03	0.00570119	2	1582.7	0.133323	30.7029	0
[truncated: 2,868 more rows]
