# Supplementary material for: Acetylation of a fungal effector that translocates host PR1 facilitates virulence
Source: eLife. 2022 Nov 14;11:e82628. doi: 10.7554/eLife.82628 (PMC9681213; doi:10.7554/eLife.82628)
Supplement: Figure 3—figure supplement 1—source data 2. [file elife-82628-fig3-figsupp1-data2.xlsx]

## Sheet: PeptideGroups
Annotated Sequence	Modifications	# Protein Groups	# Proteins	# PSMs	Master Protein Accessions	Positions in Master Proteins	Modifications in Master Proteins	# Missed Cleavages	Theo. MH+ [Da]	Abundances (Grouped): SVP1_NB	Charge (by Search Engine): Mascot	DeltaM [ppm] (by Search Engine): Mascot	RT [min] (by Search Engine): Mascot	Ions Score (by Search Engine): Mascot
[K].AAASGPAPAASAPAK.[S]		1	1	5	A0A0D2Y5A1	A0A0D2Y5A1 [78-92]		0	1237.65	2.36516e+09	2	-2	10.8036	75
[K].RDELTLEGLK.[Q]		1	1	1	A0A0D2XU92	A0A0D2XU92 [233-242]		1	1173.65	8.28734e+06	2	2.82	28.099	33
[K].RATLEDIAAK.[G]		1	1	8	A0A0D2Y5A1	A0A0D2Y5A1 [120-129]		1	1087.61	4.32212e+09	2	-0.07	18.6213	52
[R].QTPVIPPTPPTPVTQLQPQPR.[T]		1	3	2	A0A0J9V3N3	A0A0J9V3N3 [43-63]		0	2292.27	9469525	2	1.39	48.655	25
[R].QPSQGPTFGIK.[G]		1	2	1	A0A0J9URJ7	A0A0J9URJ7 [575-585]		0	1159.61	3.74218e+06	2	1.72	25.0511	33
[R].QITVNDLPVGR.[D]		1	4	1	A0A0J9VF77	A0A0J9VF77 [140-150]		0	1211.67	39353656	2	0.89	35.05	39
[R].QLLTLDEKDPK.[R]		1	1	1	A0A0D2XI69	A0A0D2XI69 [56-66]		1	1299.72		2	-1.37	24.4928	24
[K].RDFVVANKPVTVVEYATQVVTADAAPATAVPEAPASPK.[V]		1	1	3	A0A0D2Y5A1	A0A0D2Y5A1 [32-69]		1	3880.05	246371111	3	-4.32	56.7711	91
[K].QGDADIPGLTDVVHPK.[R]		1	2	1	A0A0D2XAN5	A0A0D2XAN5 [116-131]		0	1661.85	7943049	3	-1.79	38.975	24
[K].QFSAQEISSMVLTK.[M]		1	1	2	A0A0D2XAH7	A0A0D2XAH7 [116-129]		0	1568.8	14827478	2	-0.54	51.4832	86
[K].QEYDESGPSIVHR.[K]		1	2	1	A0A0D2XCE6	A0A0D2XCE6 [360-372]		0	1516.7	10143086	3	-0.05	19.1312	50
[K].QDLPNAMNAAEITDK.[L]	1xOxidation [M7]	1	1	1	A0A0D2X919	A0A0D2X919 [128-142]		0	1646.77	6.9809e+06	2	-1.52	26.6651	79
[K].NWTEDPEVFETLR.[K]		1	2	1	A0A0D2XDM0	A0A0D2XDM0 [344-356]		0	1635.76	2.71052e+06	2	0.75	50.8841	37
[R].NVLIFDLGGGTFDVSLLTIEEGIFEVK.[S]		1	1	2	A0A0D2XA80	A0A0D2XA80 [192-218]		0	2925.55		2	8.44	57.7942	108
[K].NVALTFTVPASSSQVVAFDSDSQGGCACASNK.[V]	2xCarbamidomethyl [C26; C28]	1	1	9	A0A0D2Y5A1	A0A0D2Y5A1 [188-219]		0	3275.49	295932362	2	4.28	51.0156	107
[K].QFSAQEISSMVLTK.[M]	1xOxidation [M10]	1	1	2	A0A0D2XAH7	A0A0D2XAH7 [116-129]		0	1584.79	9847678	2	2.29	41.5637	64
[K].NQVAMNPQNTVFDAK.[R]		1	1	1	A0A0D2XA80	A0A0D2XA80 [55-69]		0	1676.81	4.23471e+06	2	0.36	32.4956	95
[R].SAAHYTETAIDEIK.[L]		1	6	1	A0A0J9WUK9	A0A0J9WUK9 [92-105]		0	1548.75	9852295	2	0.82	26.9861	51
[R].SANITISNSVGK.[L]		1	1	2	A0A0D2XAH7	A0A0D2XAH7 [503-514]		0	1190.64	19611624	2	-0.96	19.8852	44
[K].SVEMHHEQLTEGQPGDNVGFNVK.[N]		1	1	1	A0A0C4DHQ7	A0A0C4DHQ7 [272-294]		0	2552.18	4.0617e+06	4	-0.45	29.2073	67
[K].STAGDTHLGGEDFDNR.[L]		1	1	1	A0A0D2XA80	A0A0D2XA80 [219-234]		0	1691.73	9303368	3	0.38	19.0688	20
[M].SSFEQVVVIDGK.[G]	1xAcetyl [N-Term]	1	1	1	A0A0D2XKG8	A0A0D2XKG8 [2-13]	A0A0D2XKG8 1xAcetyl [N-Term]	0	1349.69		2	0.74	49.4511	80
[K].SPITGIADTGTTLLLLPDDVNSAYYAK.[V]		1	1	1	A0A0D2XJ85	A0A0D2XJ85 [289-315]		0	2809.45		3	-0.15	55.5432	84
[K].SPIMVATDVASR.[G]		1	5	1	A0A0J9VKU8	A0A0J9VKU8 [444-455]		0	1246.65		2	0.72	31.6818	16
[K].SPLDEYADTLR.[E]		1	1	1	A0A0D2Y4M4	A0A0D2Y4M4 [242-252]		0	1279.62	5.20666e+06	2	-0.07	38.421	54
[K].SAEFLLGLLK.[N]		1	1	1	A0A0D2XJZ4	A0A0D2XJZ4 [87-96]		0	1090.65		2	-1.11	56.3339	70
[K].SLVHEIVLVGGSTR.[I]		1	1	1	A0A0D2XA80	A0A0D2XA80 [327-340]		0	1466.83	2.77287e+06	3	0.42	54.1763	25
[K].SINPDEAVAYGAAVQAGILSGK.[A]		1	1	2	A0A0D2XAH7	A0A0D2XAH7 [366-387]		0	2131.1	44863598	2	1.88	53.3096	97
[K].SIGDIQVYPDK.[G]		1	1	1	A0A0D2XQM8	A0A0D2XQM8 [186-196]		0	1234.63	1664643	2	-4.35	32.6384	40
[K].SGDELTSLSDYVTR.[M]		1	2	1	A0A0D2XK76	A0A0D2XK76 [442-455]		0	1542.73		2	1.66	44.1906	47
[K].SEPIPETQEGPVTVVVAK.[S]		1	1	1	A0A0D2X8D1	A0A0D2X8D1 [348-365]		0	1880	12190104	2	0.46	39.3877	79
[R].SDDVMELGDCDAGIR.[K]	1xCarbamidomethyl [C10]	1	4	1	A0A0J9WLD1	A0A0J9WLD1 [254-268]		0	1652.69	1.96479e+06	2	-2.91	36.0122	47
[K].SAVVQVDAAPFR.[Q]		1	1	1	A0A0D2XAN2	A0A0D2XAN2 [99-110]		0	1259.67	4462503	2	-0.11	35.4116	54
[R].SLQTATEPEPPSPR.[I]		1	3	2	A0A0J9V3N3	A0A0J9V3N3 [419-432]		0	1509.75	103024192	2	-0.59	21.232	45
[K].SVSLDEIIEIAR.[T]		1	1	1	A0A0D2XJV1	A0A0D2XJV1 [103-114]		0	1344.74	3.67818e+06	2	2.86	55.0517	26
[R].NNNWSGADASCLVSAAK.[N]	1xCarbamidomethyl [C11]	1	1	2	A0A0D2Y5A1	A0A0D2Y5A1 [242-258]		0	1764.8	790451356	2	-1.27	34.5671	112
[K].NGPLALAHVYAK.[Y]		1	1	1	A0A0D2XJ85	A0A0D2XJ85 [42-53]		0	1253.7	1.65867e+06	3	-3.75	31.76	26
[R].MCDPAGFVEGYAIK.[A]	1xCarbamidomethyl [C2]; 1xOxidation [M1]	1	2	1	A0A0J9V3N3	A0A0J9V3N3 [626-639]		0	1573.7		2	-1.37	43.2211	54
[K].IWLDPNEQSEISNANSR.[Q]		1	2	1	A0A0D2XNM2	A0A0D2XNM2 [22-38]		0	1972.94		3	-1.28	38.0177	23
[K].IWHHTFYNELR.[V]		1	3	1	A0A0D2XCE6	A0A0D2XCE6 [85-95]		0	1515.75	4485557	2	-0.22	57.5084	40
[R].IVTILQNPTQYK.[I]		1	1	1	A0A0D2XDE8	A0A0D2XDE8 [69-80]		0	1417.8	8738047	2	-1.7	39.1957	51
[K].IVQAKPDHPGR.[K]		1	6	2	A0A0J9WUK9	A0A0J9WUK9 [110-120]		0	1217.67		3	-0.95	7.4421	28
[R].IVNEPTAAAIAYGLDK.[T]		1	1	1	A0A0D2XQC1	A0A0D2XQC1 [208-223]		0	1645.88		2	2.6	44.9416	51
[K].MFVLDEADEMLSR.[G]		1	1	1	A0A0D2XDK5	A0A0D2XDK5 [168-180]		0	1555.71	2.92139e+06	2	-0.65	54.1927	66
[R].IVMQPGVDVEASTTQK.[D]		1	1	1	A0A0J9U592	A0A0J9U592 [124-139]		0	1702.87	4832313	2	0.83	30.4542	36
[K].LVLNISVGESGDR.[L]		1	1	1	A0A0D2X8U8	A0A0D2X8U8 [18-30]		0	1358.73	3.87173e+06	2	3.54	43.5991	50
[R].LVEEIVQDEGEWSIWEVDGEK.[D]		1	2	1	A0A0J9V3N3	A0A0J9V3N3 [358-378]		0	2489.17	3.5463e+06	2	0.82	53.9699	117
[K].YYDTLGVAPTATEQELKK.[A]		1	1	1	A0A0D2XDM0	A0A0D2XDM0 [7-24]		1	2027.03	3.92795e+06	3	0.19	34.1722	49
[K].LTEAAETDDGER.[R]		1	2	1	A0A0D2XN69	A0A0D2XN69 [140-151]		0	1306.58		2	1.96	9.9466	61
[K].ISYGDGSSSSGDVYKDK.[V]		1	1	1	A0A0D2XJ85	A0A0D2XJ85 [154-170]		1	1764.79	2.30243e+06	3	2.29	16.2001	33
[R].LSAPSHWLLDK.[L]		1	1	1	A0A0D2XGN9	A0A0D2XGN9 [12-22]		0	1266.68	6010117	3	-1.12	53.8224	25
[K].LVLVGDGGTGK.[T]		1	1	2	A0A0D2X8T7	A0A0D2X8T7 [11-21]		0	1015.58	25457622	2	1.26	21.6651	47
[K].NLNIPGLR.[V]		1	1	8	A0A0D2Y5A1	A0A0D2Y5A1 [259-266]		0	896.531	5180738646	2	0.56	37.285	37
[K].MFVLDEADEMLSR.[G]	1xOxidation [M10]	1	1	1	A0A0D2XDK5	A0A0D2XDK5 [168-180]		0	1571.71	1.12937e+06	2	1.04	47.0587	64
[R].MGAEVPGDSIGDEFK.[G]		1	2	1	A0A0D2XAN5	A0A0D2XAN5 [32-46]		0	1551.7	3.60689e+06	2	2.26	37.3879	33
[R].NFGIGQDIQPK.[R]		1	1	1	A0A0D2XH79	A0A0D2XH79 [35-45]		0	1216.63		2	-1.65	31.5544	41
[K].NDHDEDKECVCFNK.[I]	2xCarbamidomethyl [C9; C11]	1	1	13	A0A0D2Y5A1	A0A0D2Y5A1 [161-174]		1	1809.72	5471890482	2	-0.71	12.3781	56
[K].NAYLGGMEAEDGIGINTPAKQVR.[L]	1xOxidation [M7]	1	1	1	A0A0D2Y5A1	A0A0D2Y5A1 [285-307]		1	2420.19	2.98637e+06	3	1.62	33.2668	35
[K].NAYLGGMEAEDGIGINTPAKQVR.[L]		1	1	2	A0A0D2Y5A1	A0A0D2Y5A1 [285-307]		1	2404.19	4628144	2	-7.86	47.5703	99
[K].NAYLGGMEAEDGIGINTPAK.[Q]	1xOxidation [M7]	1	1	48	A0A0D2Y5A1	A0A0D2Y5A1 [285-304]		0	2036.96	3.31841e+09	2	0.56	35.7232	127
[K].NAYLGGMEAEDGIGINTPAK.[Q]		1	1	44	A0A0D2Y5A1	A0A0D2Y5A1 [285-304]		0	2020.96	3.96359e+09	2	-0.01	42.7574	129
[K].MFVLDEADEMLSR.[G]	2xOxidation [M1; M10]	1	1	1	A0A0D2XDK5	A0A0D2XDK5 [168-180]		0	1587.7	1.44549e+06	2	-1.15	39.8511	36
[K].NAVVTVPAYFNDSQR.[Q]		1	1	1	A0A0D2XX39	A0A0D2XX39 [181-195]		0	1680.83	9804601	3	-1.19	41.4216	24
[K].NAINGFEDAR.[K]		1	2	1	A0A0D2XV06	A0A0D2XV06 [455-464]		0	1106.52	2448041	2	-1.77	21.2126	15
[K].NAETDLYEVEIR.[N]		1	1	1	A0A0J9U592	A0A0J9U592 [102-113]		0	1451.7	10805552	2	-2.13	38.616	86
[K].MVNDAEQFK.[S]		1	1	1	A0A0D2XAH7	A0A0D2XAH7 [523-531]		0	1081.5	49773484	2	0.63	17.7161	52
[R].MMMTSGEAVK.[Y]	2xOxidation [M1; M2]	1	1	1	A0A0D2XUS2	A0A0D2XUS2 [248-257]		0	1116.47		2	-1.81	9.7758	14
[R].MLDMGFEPQIR.[KR]	2xOxidation [M1; M4]	1	6	1	A0A0J9VKU8	A0A0J9VKU8 [305-315]		0	1368.63		2	-1.46	32.8899	27
[R].MLDMGFEPQIR.[KR]	1xOxidation [M1]	1	6	1	A0A0J9VKU8	A0A0J9VKU8 [305-315]		0	1352.63		2	-1	42.1398	31
[R].NATWTLSNFCR.[G]	1xCarbamidomethyl [C10]	1	1	1	A0A0D2XCN6	A0A0D2XCN6 [228-238]		0	1369.63	2.09559e+06	2	-0.17	41.7612	27
[R].IQAEEAEYK.[L]		1	1	1	A0A0D2XGN9	A0A0D2XGN9 [114-122]		0	1080.52	7.52442e+06	2	-0.1	13.0034	31
[K].SYELPDGQVITIGNER.[F]		1	1	3	A0A0D2XCE6	A0A0D2XCE6 [239-254]		0	1790.89	1.5164e+06	2	-0.49	44.4643	51
[R].TDAVESLYSDMAAR.[H]		1	2	1	A0A0J9VK62	A0A0J9VK62 [102-115]		0	1528.69	3.54693e+06	2	-2.27	43.6042	23
[R].VTPTVTDIIIR.[A]		1	1	1	A0A0D2XZN4	A0A0D2XZN4 [44-54]		0	1227.73	23595746	2	-1.06	45.2616	58
[R].VTLFLNLANDPTIER.[I]		1	1	2	A0A0D2XAN8	A0A0D2XAN8 [232-246]		0	1715.93	5.91152e+06	2	2.85	54.4178	53
[K].VSVGGLVVSSQAVEAAQK.[V]		1	1	4	A0A0D2XJ85	A0A0D2XJ85 [171-188]		0	1728.95	19151326	2	0.06	41.1776	98
[K].VPDSTYDMIGGLDQQIK.[E]		1	1	1	A0A0D2Y496	A0A0D2Y496 [126-142]		0	1879.91	3.25831e+06	2	1.67	48.4682	108
[R].VNQAISLLTTGAR.[E]		1	1	1	A0A0D2XUS0	A0A0D2XUS0 [112-124]		0	1343.76		2	0.96	40.189	55
[K].VLPPATQNAPPGDAMSEPASLEDLDNTTQNR.[V]	1xOxidation [M15]	1	2	1	A0A0D2XDM0	A0A0D2XDM0 [358-388]		0	3265.53		4	1.27	40.417	23
[R].VTYLVLDEADR.[M]		1	5	1	A0A0J9VKU8	A0A0J9VKU8 [294-304]		0	1293.67	1.99079e+06	2	-1.79	39.5242	41
[K].VLPPATQNAPPGDAMSEPASLEDLDNTTQNR.[V]		1	2	4	A0A0D2XDM0	A0A0D2XDM0 [358-388]		0	3249.53	1.42476e+07	3	0.67	46.5291	76
[K].VIILGDSGVGK.[T]		1	1	1	A0A0J9V4E0	A0A0J9V4E0 [11-21]		0	1057.63	4188749	2	0.68	32.4099	51
[K].VLEQLSGQTPVYSK.[A]		1	1	1	A0A0D2X8U8	A0A0D2X8U8 [37-50]		0	1548.83		3	-0.78	30.6168	14
[M].VLAVDLLNPSPAAEAK.[K]		1	1	1	A0A0D2XW30	A0A0D2XW30 [2-17]		0	1607.9	5.56362e+06	2	0.69	49.1882	53
[K].VKDEANEYAQVLAK.[R]		1	1	1	A0A0D2XAN5	A0A0D2XAN5 [204-217]		1	1577.82	2.42532e+06	2	4.01	26.1594	86
[K].VFVSAYSHELK.[A]		1	2	1	A0A0D2XN69	A0A0D2XN69 [83-93]		0	1279.67		2	1.55	26.2864	41
[R].VFGNSDGMMDEDDEDGHPGGER.[V]	1xOxidation [M9]	1	2	1	A0A0D2XDM0	A0A0D2XDM0 [389-410]		0	2381.89	2.07537e+06	3	-0.16	19.5359	72
[K].VINYNHLMPTR.[Y]		1	1	1	A0A0D2XUP9	A0A0D2XUP9 [73-83]		0	1357.7	3.9725e+06	3	0.26	27.4065	36
[R].VFGNSDGMMDEDDEDGHPGGER.[V]		1	2	1	A0A0D2XDM0	A0A0D2XDM0 [389-410]		0	2365.89	10224849	3	-0.66	24.5438	62
[K].VVLIGDSGVGK.[S]		1	2	1	A0A0D2YC80	A0A0D2YC80 [12-22]		0	1043.61		2	-1.16	28.5771	48
[K].VVVVAYLNADDK.[S]		1	1	2	A0A0D2X8D1	A0A0D2X8D1 [149-160]		0	1305.7	2.65948e+06	2	1.49	39.4952	28
[K].NDHDEDKECVCFNK.[I]	K7(GlyGly); 2xCarbamidomethyl [C9; C11]	1	1	1	A0A0D2Y5A1	A0A0D2Y5A1 [161-174]		1	1923.76		3	-1.42699	20.03	7
[K].YYDTLGVAPTATEQELK.[K]		1	1	1	A0A0D2XDM0	A0A0D2XDM0 [7-23]		0	1898.94	26254208	2	0.94	40.1243	74
[R].YTLELEGLK.[G]		1	1	1	A0A0D2XUP9	A0A0D2XUP9 [84-92]		0	1065.58	8782846	2	1.52	41.5615	58
[R].YPIEHGVVTNWDDMEK.[I]	1xOxidation [M14]	1	1	1	A0A0D2XCE6	A0A0D2XCE6 [69-84]		0	1948.87	5.31874e+06	3	-1.66	34.8652	14
[R].YPIEHGVVTNWDDMEK.[I]		1	1	3	A0A0D2XCE6	A0A0D2XCE6 [69-84]		0	1932.88	3.81382e+07	2	-0.23	41.3919	46
[K].YNFGFIDSTAYTGK.[I]		1	1	1	A0A0D2XJ85	A0A0D2XJ85 [246-259]		0	1583.74	7.95865e+06	2	-0.57	50.4258	83
[K].YENNVMNIR.[Q]		1	2	1	A0A0D2XV06	A0A0D2XV06 [322-330]		0	1152.55		2	-0.16	24.556	51
[K].VVQWLDDNQQATR.[E]		1	1	1	A0A0D2XA80	A0A0D2XA80 [576-588]		0	1572.78	5.97564e+06	2	-0.52	31.0597	58
[K].YEDLASQFAASEFK.[D]		1	1	1	A0A0D2X8D1	A0A0D2X8D1 [397-410]		0	1605.74	15032192	2	3.93	47.9954	65
[K].YAPLDLRPK.[Q]		1	1	1	A0A0D2X911	A0A0D2X911 [79-87]		0	1072.61	9427798	3	-1.96	26.2555	33
[R].YAATEIQSSK.[S]		1	1	1	A0A0D2XJZ4	A0A0D2XJZ4 [4-13]		0	1097.55	9790332	2	-3.6	12.8023	77
[R].WLLTINMDSK.[T]	1xOxidation [M7]	1	2	1	A0A0J9V3N3	A0A0J9V3N3 [507-516]		0	1236.63	30841626	2	-3.62	44.0995	45
[R].WLLTINMDSK.[T]		1	2	1	A0A0J9V3N3	A0A0J9V3N3 [507-516]		0	1220.63	12970981	2	-2.04	52.839	50
[R].WLAIDILPGEAISQDAVK.[M]		1	2	2	A0A0D2XDM0	A0A0D2XDM0 [297-314]		0	1939.05	2.29274e+07	2	1.58	55.8901	48
[K].VYEPLLVVGLDK.[F]		1	1	2	A0A0D2Y5E6	A0A0D2Y5E6 [47-58]		0	1344.78	4939197	2	-0.41	51.141	65
[K].YDYTTTFK.[N]		1	1	2	A0A0D2Y5A1	A0A0D2Y5A1 [153-160]		0	1038.48	2943584000	2	0.68	25.168	46
[K].TAVGLDTILNQK.[R]		1	2	1	A0A0J9WFZ0	A0A0J9WFZ0 [218-229]		0	1272.72		2	-2.34	43.118	33
[K].VFEGVPPPYDK.[T]		1	1	1	A0A0D2XKG8	A0A0D2XKG8 [106-116]		0	1247.63	3.5543e+06	2	0.49	30.8277	22
[K].VDATLNDVPDEIQGFPTIK.[L]		1	1	2	A0A0D2X8D1	A0A0D2X8D1 [418-436]		0	2072.05	7.15568e+06	2	3.12	51.5253	85
[R].TMADEGVMSLWR.[G]		1	1	1	A0A0D2XUS2	A0A0D2XUS2 [69-80]		0	1395.64	1.63926e+06	2	0.03	50.0222	40
[K].TITLEVESSDTIDNVK.[S]		1	3	17	A0A0D2XGI2	A0A0D2XGI2 [12-27]; [88-103]; [164-179]		0	1763.89	2.07943e+08	2	0.14	39.8633	84
[R].TIQFVDWCPTGFK.[L]	1xCarbamidomethyl [C8]	1	1	1	A0A0D2XAP0	A0A0D2XAP0 [340-352]		0	1598.77	2.41219e+06	2	-0.02	53.6387	60
[K].TLPDAVTIIEPK.[E]		1	1	1	A0A0D2XZN4	A0A0D2XZN4 [206-217]		0	1296.74	11931579	2	2.13	46.0158	44
[K].TLLEAIDSIEPPK.[R]		1	1	1	A0A0C4DHQ7	A0A0C4DHQ7 [208-220]		0	1425.78	2.04848e+06	3	1.95	50.6556	48
[K].TLASDGIAGLYR.[G]		1	1	1	A0A0D2XUS2	A0A0D2XUS2 [173-184]		0	1236.66	41090452	2	-2.49	39.0683	46
[K].TNESELLATIDK.[E]		1	1	1	A0A0J9WFZ0	A0A0J9WFZ0 [516-527]		0	1333.68		2	3.44	39.5586	38
[R].TLADYNIQKESTLHLVLR.[L]	1xGG [K9]	1	1	1	A0A0D2XGI2	A0A0D2XGI2 [55-72]		1	2228.2	8.12392e+06	4	-2.12	56.9337	52
[K].TGVIYNVTK.[S]		1	1	1	A0A0D2XI68	A0A0D2XI68 [61-69]		0	994.557		2	-0.94	21.1166	55
[R].TFTTVADNQQTVQFPVYQGER.[V]		1	1	5	A0A0D2XAH7	A0A0D2XAH7 [432-452]		0	2429.17	1.57328e+07	2	2.1	45.7431	102
[K].TFFDNAASTLGSPVFTADLK.[H]		1	1	2	A0A0D2XJ85	A0A0D2XJ85 [220-239]		0	2102.04	19789693	2	1.71	54.7167	133
[R].TETAVPPPIIPTLSSASSKPTPSPEQK.[R]		1	3	1	A0A0J9V3N3	A0A0J9V3N3 [64-90]		0	2760.47	2.37289e+06	3	1.71	51.9325	15
[R].TDSTYPSGFMDVITIEK.[T]		1	1	1	A0A0D2XGN9	A0A0D2XGN9 [78-94]		0	1903.9	2.13271e+06	2	2.68	51.2395	45
[R].TDAVESLYSDMAAR.[H]	1xOxidation [M11]	1	2	1	A0A0J9VK62	A0A0J9VK62 [102-115]		0	1544.69		2	0.18	28.8339	48
[R].TLADYNIQK.[E]		1	1	1	A0A0D2XGI2	A0A0D2XGI2 [55-63]		0	1065.56	579963072	2	0.96	21.0092	49
[K].VDELKPEFPAVGK.[K]		1	1	1	A0A0C4DHS7	A0A0C4DHS7 [267-279]		0	1428.77	1.76666e+06	3	-0.31	34.2413	35
[K].TPGPGAQSALR.[A]		1	2	1	A0A0D2Y2S1	A0A0D2Y2S1 [107-117]		0	1054.56	97156704	2	-1.36	14.1782	44
[R].TSPTADGGVKEETVPVVK.[T]		1	2	1	A0A0J9V3N3	A0A0J9V3N3 [583-600]		1	1813.95	3.24321e+06	2	1.12	22.8069	68
[K].VDADTVPK.[A]		1	1	7	A0A0D2Y5A1	A0A0D2Y5A1 [70-77]		0	844.441	9.21684e+09	2	-1.86	12.2789	50
[R].VCENIPIVLCGNK.[V]	2xCarbamidomethyl [C2; C10]	1	1	1	A0A0D2X8T7	A0A0D2X8T7 [109-121]		0	1515.77	2650919	2	-4.75	41.0596	15
[R].VCDSDNTCSTINPGGTGKNAYLGGMEAEDGIGINTPAK.[Q]	2xCarbamidomethyl [C2; C8]; 1xOxidation [M25]	1	1	2	A0A0D2Y5A1	A0A0D2Y5A1 [267-304]		1	3900.73		3	-10.9	44.3561	86
[R].VCDSDNTCSTINPGGTGK.[N]	2xCarbamidomethyl [C2; C8]; 1xPhospho [S/T]	1	1	1	A0A0D2Y5A1	A0A0D2Y5A1 [267-284]	A0A0D2Y5A1 1xPhospho [S/T]	0	1962.76	1.9945e+06	2	1.42	16.3931	103
[R].VCDSDNTCSTINPGGTGK.[N]	2xCarbamidomethyl [C2; C8]	1	1	11	A0A0D2Y5A1	A0A0D2Y5A1 [267-284]		0	1882.79	1687645225	2	-3.63	18.4922	128
[K].VATTEQAQEVHK.[A]		1	1	2	A0A0D2XEA1	A0A0D2XEA1 [174-185]		0	1340.68	5.64132e+06	3	1.22	8.739	48
[K].TPQNEVLVDLSDCSK.[A]	1xCarbamidomethyl [C13]	1	2	2	A0A0J9V3N3	A0A0J9V3N3 [517-531]		0	1704.81	1.63e+07	2	-5.26	38.347	90
[R].VAPEEHPVLLTEAPINPK.[S]		1	1	4	A0A0D2XCE6	A0A0D2XCE6 [96-113]		0	1954.06	80397124	3	-0.21	39.7	37
[K].TTYAASSQIR.[A]		1	1	1	A0A0D2XBZ0	A0A0D2XBZ0 [153-162]		0	1097.56	7.72345e+06	2	2.96	13.6653	67
[R].TTPSFVGFTDTER.[L]		1	1	1	A0A0D2XA80	A0A0D2XA80 [35-47]		0	1457.69	9420741	2	4.45	38.8592	57
[K].TTPEQVVEQIAK.[L]		1	1	1	A0A0D2XCY5	A0A0D2XCY5 [28-39]		0	1342.72	5825027	2	-1.84	44.4526	50
[K].TTGFALVYDSPEAMK.[K]		1	1	1	A0A0D2YBR1	A0A0D2YBR1 [72-86]		0	1629.78	5649222	2	0.15	46.9591	73
[R].TSVLHDALNAINNAEK.[A]		1	1	1	A0A0D2XDZ1	A0A0D2XDZ1 [4-19]		0	1709.88	1.61857e+06	3	0.32	54.2104	29
[R].TSPTADGGVKEETVPVVK.[T]	1xPhospho [T/S]	1	2	1	A0A0J9V3N3	A0A0J9V3N3 [583-600]	A0A0J9V3N3 1xPhospho [T/S]	1	1893.92	8337672	2	-0.03	25.8566	44
[R].TVEDLANFIK.[E]		1	1	1	A0A0D2X8D1	A0A0D2X8D1 [454-463]		0	1149.62	29493236	2	-1.68	47.8073	75
[R].LPAGTLMLGAEGLK.[N]		1	2	1	A0A0D2XV06	A0A0D2XV06 [441-454]		0	1370.77		2	0.24	51.5714	21
[R].LTPDVDALDIAANK.[L]		1	2	1	A0A0J9VGR3	A0A0J9VGR3 [137-150]		0	1455.77	1.96582e+06	2	-0.91	43.5228	84
[R].LPAGGVGDMVMATVK.[K]	1xOxidation [M9]	1	1	1	A0A0D2XB71	A0A0D2XB71 [51-65]		0	1461.74	2.5602e+06	2	5.89	35.8715	57
[R].DMGVVEEAGLGPSKPEEKPVAEAEAEAEEK.[K]		1	2	1	A0A0J9V3N3	A0A0J9V3N3 [546-575]		0	3125.48	9607517	3	-0.41	37.3401	64
[R].DMGVVEEAGLGPSKPEEKPVAEAEAEAEEK.[K]	1xOxidation [M2]	1	2	3	A0A0J9V3N3	A0A0J9V3N3 [546-575]		0	3141.48	2.95173e+07	3	2.29	33.2602	49
[R].DNIQGITKPAIR.[R]		1	1	1	A0A0D2XZH3	A0A0D2XZH3 [25-36]		0	1325.75		2	0.29	23.7866	59
[K].DQATGGKSSSR.[R]	1xAcetyl [K7(100)]	1	2	1	A0A0J9V3N3	A0A0J9V3N3 [270-280]	A0A0J9V3N3 1xAcetyl [K276(100)]	1	1135.53	5.20385e+06	2	-2.32	6.255	60
[K].DSTLIMQLLR.[D]		1	2	1	A0A0D2XDJ9	A0A0D2XDJ9 [16-25]		0	1189.66	2.90993e+06	2	-1.11	55.4609	49
[R].DTYLFGGVNDAAVAEAEGVK.[A]		1	1	1	A0A0D2X8D1	A0A0D2X8D1 [175-194]		0	2025.98	9612553	2	0.24	49.8432	105
[R].EAYPGDVFYLHSR.[L]		1	2	3	A0A0J9WFZ0	A0A0J9WFZ0 [334-346]		0	1553.74	8713673	2	0.95	37.6905	52
[K].EDGQEYAQVVK.[M]	1xAcetyl [K11(100)]	1	1	1	A0A0D2XGV1	A0A0D2XGV1 [30-40]	A0A0D2XGV1 1xAcetyl [K40(100)]	0	1307.61	4.28307e+06	2	8.39	26.871	46
[R].EDLAALEK.[D]		1	2	1	A0A0J9U739	A0A0J9U739 [314-321]		0	888.467	48792784	2	-0.36	21.1318	44
[K].EEQAVLQPVSQDYGAK.[A]		1	1	1	A0A0D2XZN4	A0A0D2XZN4 [218-233]		0	1761.87	3.66594e+06	2	-0.81	28.8328	61
[R].EGILGGPEKPISDLGK.[K]		1	2	2	A0A0J9V3N3	A0A0J9V3N3 [478-493]		0	1609.88	104472422	2	1.37	35.6863	50
[K].EGIPPDQQR.[L]		1	3	1	A0A0D2XGI2	A0A0D2XGI2 [34-42]; [110-118]; [186-194]		0	1039.52	156219744	2	-0.63	10.8995	47
[K].EGTVPAALSNEEK.[-]		1	4	1	A0A0J9WLD1	A0A0J9WLD1 [425-437]		0	1344.66	11579175	2	-0.21	20.9637	17
[R].ELAEEGYSGVEVR.[V]		1	1	1	A0A0D2XZN4	A0A0D2XZN4 [31-43]		0	1437.69	14855412	2	-0.95	27.1123	56
[K].EISHAYEILSDSQK.[R]		1	1	1	A0A0D2XDM0	A0A0D2XDM0 [50-63]		0	1619.79	72564672	3	3.67	29.4707	26
[K].EITALAPSSMK.[V]		1	1	2	A0A0D2XCE6	A0A0D2XCE6 [316-326]		0	1147.6	19489694	2	0.3	29.2139	52
[K].EITALAPSSMK.[V]	1xOxidation [M10]	1	1	1	A0A0D2XCE6	A0A0D2XCE6 [316-326]		0	1163.6	25440058	2	0.46	20.265	22
[K].GATPSQIGVVLR.[D]		1	1	1	A0A0D2XCY5	A0A0D2XCY5 [44-55]		0	1197.69	10886022	2	2.75	34.907	48
[K].GASDGGILVPHSEK.[R]		1	2	1	A0A0D2XN69	A0A0D2XN69 [177-190]		0	1366.7	3.23485e+06	2	1.77	19.6419	71
[R].GAAQNIIPSSTGAAK.[A]		1	1	1	A0A0D2XVJ4	A0A0D2XVJ4 [72-86]		0	1385.74		2	-0.34	22.8159	20
[R].LPAGGVGDMVMATVK.[K]	2xOxidation [M9; M11]	1	1	1	A0A0D2XB71	A0A0D2XB71 [51-65]		0	1477.74		2	5.47	27.0584	50
[R].FPGQLNSDLR.[K]		1	2	1	A0A0C4DHQ2	A0A0C4DHQ2 [242-251]		0	1146.59	28951618	2	-0.48	30.9695	39
[R].FLQLAGVEDAYTSSAGSTK.[T]		1	1	1	A0A0D2Y4M4	A0A0D2Y4M4 [191-209]		0	1944.95	1.24299e+06	2	0.61	46.6841	108
[K].DIICQIVTSEISGDK.[V]	1xCarbamidomethyl [C4]	1	2	1	A0A0D2XN69	A0A0D2XN69 [68-82]		0	1677.84	16239052	2	-0.6	51.6178	57
[K].FLDGLYVSEK.[G]		1	1	2	A0A0J9U592	A0A0J9U592 [173-182]		0	1170.6	133276259	2	3.39	39.8119	56
[R].FDAQTGADR.[E]		1	1	1	A0A0D2Y8T0	A0A0D2Y8T0 [275-283]		0	980.443	7.43375e+06	2	-2.28	9.9877	47
[K].FADPEVQADMK.[H]		1	1	1	A0A0D2XA80	A0A0D2XA80 [76-86]		0	1250.57	4931395	2	1.78	25.9576	62
[R].EVSGISLDK.[S]		1	6	1	A0A0J9WUK9	A0A0J9WUK9 [299-307]		0	947.504	55186444	2	0.94	20.994	38
[K].EVLGESSGNLGK.[T]		1	2	1	A0A0J9V3N3	A0A0J9V3N3 [249-260]		0	1189.61	60568820	2	0.6	19.1737	52
[K].ESTLHLVLR.[L]		1	3	5	A0A0D2XGI2	A0A0D2XGI2 [64-72]; [140-148]; [216-224]		0	1067.62	260775582	2	0.58	51.1077	70
[R].EPETATATTDLEIDTK.[E]		1	4	1	A0A0J9WLD1	A0A0J9WLD1 [355-370]		0	1734.83	2.00345e+06	2	2.22	29.8779	76
[K].FELTGIPPAPR.[G]		2	2	2	A0A0D2XA80; A0A0D2XQC1	A0A0D2XA80 [458-468]; A0A0D2XQC1 [491-501]		0	1197.66	1.07963e+07	2	0.42	44.0088	23
[K].DLGAKDQATGGK.[S]	1xAcetyl [K5(100)]	1	2	1	A0A0J9V3N3	A0A0J9V3N3 [265-276]	A0A0J9V3N3 1xAcetyl [K269(100)]	1	1202.6		2	2.91	14.2484	30
[K].DGLFCQNLSLFAK.[L]	1xCarbamidomethyl [C5]	1	3	1	A0A0J9V3N3	A0A0J9V3N3 [379-391]		0	1512.75	2.99804e+06	2	-1.62	54.0458	57
[R].DGELVFGVAR.[I]		1	1	1	A0A0D2Y2S1	A0A0D2Y2S1 [23-32]		0	1062.56	21378144	2	0.87	39.0689	15
[K].AFSPTTINTGR.[G]		1	2	1	A0A0D2XYK9	A0A0D2XYK9 [197-207]		0	1164.6	6.69943e+06	2	-0.42	24.2249	29
[K].AFSGTIEPVAQVLK.[D]		1	1	2	A0A0D2XAH7	A0A0D2XAH7 [313-326]		0	1459.82	4.38959e+07	2	-1.94	48.2472	32
[K].AEDAHAFDVISVK.[I]		1	6	2	A0A0J9WUK9	A0A0J9WUK9 [321-333]		0	1401.7	18340090	2	2.95	33.6728	62
[R].ADTAEAIDFFR.[R]		1	1	1	A0A0C4DHW5	A0A0C4DHW5 [305-315]		0	1255.6	2.2582e+06	2	-3.47	47.58	22
[K].ADRDESSPYAAMLAAQDVAAR.[C]		1	2	1	A0A0D2Y2S1	A0A0D2Y2S1 [64-84]		1	2208.03	3683748	3	1.9	42.1886	58
[M].ADNDSPVTLR.[T]	1xAcetyl [N-Term]	1	1	1	A0A0D2YBR1	A0A0D2YBR1 [2-11]	A0A0D2YBR1 1xAcetyl [N-Term]	0	1129.55	6340125	2	0.32	28.1383	53
[K].AGISLNDNFVK.[L]		1	1	1	A0A0D2XVJ4	A0A0D2XVJ4 [170-180]		0	1177.62	13710349	2	-0.64	36.9124	17
[K].ADLVNNLGTIAR.[S]		1	1	1	A0A0D2XK76	A0A0D2XK76 [86-97]		0	1256.7	74415792	2	2.91	38.3412	49
[M].ADEYDAEQAAELK.[R]	1xAcetyl [N-Term]	1	1	1	A0A0D2X9U6	A0A0D2X9U6 [2-14]	A0A0D2X9U6 1xAcetyl [N-Term]	0	1494.66	2698186	2	1.64	32.7303	72
[K].AAQAAQAAQDAR.[V]		1	1	1	A0A0D2XZN4	A0A0D2XZN4 [234-245]		0	1171.58	14925678	2	-1.11	8.4454	69
[K].AAIEGSYIDK.[K]		1	1	1	A0A0D2XAT5	A0A0D2XAT5 [52-61]		0	1066.54	3.90691e+06	2	-0.31	19.8868	30
[K].AAGAPALDTNIETGGFDEK.[R]		1	2	1	A0A0D2Y4T6	A0A0D2Y4T6 [6-24]		0	1876.89		2	-0.42	38.1626	90
[K].AAFVVFDGGNQQVGWAK.[K]		1	1	1	A0A0D2XJ85	A0A0D2XJ85 [389-405]		0	1793.9	5.99867e+06	2	1.34	51.091	55
[K].AAASGPAPAASAPAK.[S]	1xPhospho [S]	1	1	2	A0A0D2Y5A1	A0A0D2Y5A1 [78-92]	A0A0D2Y5A1 1xPhospho [S]	0	1317.62	1.8885e+07	2	1.35	8.9656	10
[R].ADGVNVINVGK.[T]		1	1	1	A0A0D2Y970	A0A0D2Y970 [45-55]		0	1085.59	3.31384e+06	2	0.85	26.2095	11
[K].GDADDNAATEIDVTK.[K]		1	3	1	A0A0J9WMP9	A0A0J9WMP9 [243-257]		0	1534.69		2	-5.44	21.6706	35
[K].AKMEDAVAEK.[E]	1xOxidation [M3]	1	1	1	A0A0D2XVV5	A0A0D2XVV5 [402-411]		1	1107.54		2	3.44	7.2848	55
[K].ALQDGPQVVVGTPGR.[V]		1	1	1	A0A0D2XDK5	A0A0D2XDK5 [137-151]		0	1493.81		2	-1.15	29.5998	61
[R].DFVVANKPVTVVEYATQVVTADAAPATAVPEAPASPKVDADTVPK.[A]		1	1	1	A0A0D2Y5A1	A0A0D2Y5A1 [33-77]		1	4549.37		4	-4.5	55.8101	0
[R].DFVVANKPVTVVEYATQVVTADAAPATAVPEAPASPK.[V]		1	1	9	A0A0D2Y5A1	A0A0D2Y5A1 [33-69]		0	3723.95	1479571468	3	-0.86	55.8885	100
[R].DFLLPSNVVSQADLTR.[L]		1	2	1	A0A0D2XCJ2	A0A0D2XCJ2 [281-296]		0	1774.93		2	0.76	52.597	56
[K].DAPVTYQGSR.[T]		1	1	1	A0A0D2X8D1	A0A0D2X8D1 [444-453]		0	1093.53	7.63074e+06	2	-0.66	13.2175	36
[K].DAGSIAGLNVLR.[I]		1	1	2	A0A0D2XAH7	A0A0D2XAH7 [163-174]		0	1185.66	1.07277e+08	2	0	44.541	33
[R].CTGCDGHGMK.[T]	2xCarbamidomethyl [C1; C4]	1	2	1	A0A0D2XDM0	A0A0D2XDM0 [164-173]		0	1122.41		2	0.77	5.8254	35
[K].ALDEIYGSTTEASAHK.[R]		1	2	1	A0A0D2XCJ2	A0A0D2XCJ2 [264-279]		0	1692.81		3	-1.87	23.3107	33
[K].AVITVPAYFNDNQR.[Q]		1	1	2	A0A0D2XAH7	A0A0D2XAH7 [145-158]		0	1607.82	69976018	2	1.24	44.7727	62
[R].ATLEDIAAK.[G]		1	1	45	A0A0D2Y5A1	A0A0D2Y5A1 [121-129]		0	931.509	6.19287e+09	2	-1.35	21.43	58
[K].ATDFVLAEPEK.[A]		1	3	1	A0A0J9WQK8	A0A0J9WQK8 [191-201]		0	1219.62	1.78068e+06	2	0.13	32.9906	29
[K].ATAGDTHLGGQDFDTNLLDHCK.[K]	1xCarbamidomethyl [C21]	1	1	2	A0A0D2XAH7	A0A0D2XAH7 [225-246]		0	2386.07	1.83547e+07	3	-0.16	34.5011	61
[R].APTGSNTLILR.[G]		1	2	1	A0A0J9UWK8	A0A0J9UWK8 [176-186]		0	1142.65	1.03416e+06	2	1.67	27.7976	14
[R].ANAGGMAGHVWLEDTPGMK.[G]	1xOxidation [M6]	1	6	1	A0A0J9WUK9	A0A0J9WUK9 [481-499]		0	1957.89	2.99703e+06	3	-1.24	32.7447	39
[R].ALQTAAELAGLK.[V]		1	1	1	A0A0D2Y8Y5	A0A0D2Y8Y5 [196-207]		0	1185.68		2	-2.88	36.7784	24
[K].AVDEIVLVGGSTR.[I]		1	1	1	A0A0D2XAH7	A0A0D2XAH7 [334-346]		0	1315.72	4825922	3	-4.37	36.6439	27
[R].GEGDQAPGVQAGDVVFEIEQKPHAR.[F]		1	2	1	A0A0D2XDM0	A0A0D2XDM0 [239-263]		0	2634.29	2510161	3	1	40.927	20
[R].FQTVCPDCNGEGEIIK.[E]	2xCarbamidomethyl [C5; C8]	1	2	2	A0A0D2XDM0	A0A0D2XDM0 [186-201]		0	1866.84	7.21918e+06	2	0.74	32.7404	76
[R].IEDVTPTPSDSTR.[R]		1	2	1	A0A0D2Y2S1	A0A0D2Y2S1 [129-141]		0	1417.68	19169464	2	1.25	17.8759	61
[R].LDTYSEVYR.[R]		1	1	1	A0A0D2XEN0	A0A0D2XEN0 [176-184]		0	1145.55		2	-0.78	24.0099	32
[K].IEASDKETLTAEIDK.[V]		1	1	1	A0A0D2XA80	A0A0D2XA80 [561-575]		1	1662.84	3.29505e+06	3	-0.26	25.3261	43
[R].GEGIDGWATEVR.[K]		1	6	2	A0A0J9WUK9	A0A0J9WUK9 [512-523]		0	1289.61	5.72354e+07	2	-1.09	31.9971	62
[K].IEEEDKETILEAVK.[E]		1	1	1	A0A0D2XQC1	A0A0D2XQC1 [595-608]		1	1645.85	2.31047e+06	3	-0.93	31.879	21
[K].IESTISDAMAALELNESSAEDLK.[K]		1	1	1	A0A0D2XAH7	A0A0D2XAH7 [575-597]		0	2437.17	2208028	3	-6.9	54.073	77
[K].IESTISDAMAALELNESSAEDLKK.[Q]	1xOxidation [M9]	1	1	2	A0A0D2XAH7	A0A0D2XAH7 [575-598]		1	2581.25	1.11567e+07	3	7.9	45.6437	19
[R].IETGVIKPGMVVTFAPSNVTTEVK.[S]	1xOxidation [M10]	1	1	1	A0A0C4DHQ7	A0A0C4DHQ7 [248-271]		0	2533.36	3.19778e+06	3	2.98	53.2169	20
[K].IEVEYLGENK.[Q]		1	1	1	A0A0D2XAH7	A0A0D2XAH7 [106-115]		0	1193.6	112715696	2	0.36	29.7267	52
[K].IFDVSAFEK.[F]		1	1	1	A0A0D2XMZ6	A0A0D2XMZ6 [30-38]		0	1055.54	2303664	2	2.11	42.9932	37
[R].LFEGNALIR.[R]		1	1	1	A0A0D2XI69	A0A0D2XI69 [68-76]		0	1032.58	11981616	2	-0.34	36.836	41
[K].LGEIVTTIPTIGFNVETVEYK.[N]		1	2	2	A0A0D2X919	A0A0D2X919 [39-59]		0	2323.24	8.6853e+06	3	0.2	55.3506	82
[K].IGGIGTVPVGR.[I]		1	1	2	A0A0C4DHQ7	A0A0C4DHQ7 [237-247]		0	1025.61	400889856	2	0.31	29.54	64
[K].IGPLGLSPK.[K]		1	1	1	A0A0D2XJV1	A0A0D2XJV1 [32-40]		0	881.545	45137212	2	-5.29	32.4925	57
[K].IGPNGLIDGFFAK.[N]		1	1	8	A0A0D2Y5A1	A0A0D2Y5A1 [175-187]		0	1348.73	5.47485e+09	2	-0.06	54.2009	82
[R].LLDDFDSYSR.[Q]		1	1	1	A0A0D2X8M4	A0A0D2X8M4 [21-30]		0	1230.56	2619362	2	0.74	35.3445	19
[R].ILEVSLADLQK.[D]		1	1	1	A0A0D2XBZ0	A0A0D2XBZ0 [65-75]		0	1228.71	16036449	2	-0.76	47.9965	52
[R].LIFAGKQLEDGR.[T]	1xGG [K6]	1	3	5	A0A0D2XGI2	A0A0D2XGI2 [43-54]; [119-130]; [195-206]		1	1460.79	3.52766e+08	3	0.34	30.5281	57
[R].LPAGGVGDMVMATVK.[K]		1	1	1	A0A0D2XB71	A0A0D2XB71 [51-65]		0	1445.75	4167199	2	0.84	50.5792	73
[R].LNLPYAEAVFDISYFR.[N]		1	3	1	A0A0J9WLD1	A0A0J9WLD1 [68-83]		0	1917.97		2	-7.38	56.3586	41
[K].INLGVGAYR.[D]		1	2	1	A0A0J9VPV0	A0A0J9VPV0 [55-63]		0	962.542	3.22829e+06	2	0	31.2587	34
[R].ILTGTVVSTK.[M]		1	1	1	A0A0D2XAT5	A0A0D2XAT5 [75-84]		0	1018.61	15444944	2	-0.4	21.6229	58
[K].LLSEFFDGK.[K]		1	1	2	A0A0D2XAH7	A0A0D2XAH7 [353-361]		0	1055.54	62372780	2	-0.43	44.6794	58
[K].LISDGLIIR.[K]		1	2	1	A0A0D2XNM2	A0A0D2XNM2 [44-52]		0	999.62	9774988	2	1.13	41.5088	52
[R].LDSGNFAWGSEGLTR.[K]		1	1	1	A0A0D2XAN2	A0A0D2XAN2 [60-74]		0	1609.76	8819904	2	0.02	42.1842	95
[R].LLNTNVDGK.[Q]		1	1	1	A0A0D2XDE8	A0A0D2XDE8 [17-25]		0	973.531	13040035	2	0.01	16.9933	55
[R].IINEPTAAAIAYGLDKK.[V]		1	1	6	A0A0D2XA80	A0A0D2XA80 [170-186]		1	1787.99	4.29835e+07	2	-0.01	52.1684	64
[R].IINEPTAAAIAYGLDK.[K]		1	1	12	A0A0D2XA80	A0A0D2XA80 [170-185]		0	1659.9	2.14092e+09	2	0.13	47.4999	90
[R].ILMVGLDAAGK.[T]	1xOxidation [M3]	1	2	1	A0A0D2X919	A0A0D2X919 [20-30]		0	1103.61	27839444	2	0.82	33.2341	53
[K].LLIQNQDEMLK.[T]	1xOxidation [M9]	1	1	1	A0A0D2XUS2	A0A0D2XUS2 [41-51]		0	1360.71	6487986	2	1.32	27.7268	65
[K].LLIQNQDEMLK.[T]		1	1	1	A0A0D2XUS2	A0A0D2XUS2 [41-51]		0	1344.72	24867210	2	-0.09	34.3974	66
[K].LLFLGLDNAGK.[T]		1	1	1	A0A0D2XEG6	A0A0D2XEG6 [23-33]		0	1160.67	2.61447e+06	2	1.49	49.9605	39
[R].IINEPTAAAIAYGLGAGK.[S]		1	1	2	A0A0D2XAH7	A0A0D2XAH7 [175-192]		0	1729.95	35777072	2	-1.21	51.0377	91
[K].LAATADPVLLIK.[D]		1	1	1	A0A0D2Y8Y5	A0A0D2Y8Y5 [890-901]		0	1224.76	1.6766e+06	2	-0.24	48.4275	31
[R].YYVTVIDAPGHR.[D]		1	1	1	A0A0C4DHQ7	A0A0C4DHQ7 [68-79]		0	1390.71	4276505	2	1.47	29.8921	63
[R].LAAEVGAVVIDESDEGVPLEK.[E]		1	4	1	A0A0J9WLD1	A0A0J9WLD1 [312-332]		0	2140.1		3	2.02	49.3829	25
[K].GNTGVPGDFGCNMMTVDEDVADKYDYTTTFK.[N]	1xCarbamidomethyl [C11]; 2xOxidation [M13; M14]	1	1	11	A0A0D2Y5A1	A0A0D2Y5A1 [130-160]		1	3480.46	2.93102e+08	3	-0.02	49.9179	44
[K].GNTGVPGDFGCNMMTVDEDVADK.[Y]	1xCarbamidomethyl [C11]; 2xOxidation [M13; M14]	1	1	2	A0A0D2Y5A1	A0A0D2Y5A1 [130-152]		0	2461	27849624	3	-0.47	32.328	56
[R].GPLVIYDPETDGK.[E]		1	2	1	A0A0D2XCJ2	A0A0D2XCJ2 [208-220]		0	1403.71	3.9357e+06	2	0.93	37.4525	25
[K].GNTGVPGDFGCNMMTVDEDVADK.[Y]	1xCarbamidomethyl [C11]; 1xOxidation [M]	1	1	5	A0A0D2Y5A1	A0A0D2Y5A1 [130-152]		0	2445	3.51538e+07	2	-4.6	38.0388	86
[K].GVVDSEDLPLNLSR.[E]		1	2	1	A0A0D2XK76	A0A0D2XK76 [359-372]		0	1513.79	3.36503e+06	2	-4.17	45.8795	28
[K].GNTGVPGDFGCNMMTVDEDVADK.[Y]	1xCarbamidomethyl [C11]	1	1	3	A0A0D2Y5A1	A0A0D2Y5A1 [130-152]		0	2429.01	76475776	2	4.23	46.8827	99
[R].HDGGFNIVHVK.[D]		1	1	2	A0A0D2XGN9	A0A0D2XGN9 [201-211]		0	1222.63	3.15497e+06	3	-0.83	53.5826	34
[R].GIVGASLDVIK.[E]		1	1	1	A0A0D2XGT0	A0A0D2XGT0 [81-91]		0	1071.64	9167408	2	-0.61	42.758	30
[K].GNTGVPGDFGCNMMTVDEDVADKYDYTTTFK.[N]	1xCarbamidomethyl [C11]; 1xOxidation [M]	1	1	5	A0A0D2Y5A1	A0A0D2Y5A1 [130-160]		1	3464.46	212139284	3	-0.25	51.7653	55
[R].HWALPDVLR.[E]		1	6	1	A0A0J9WUK9	A0A0J9WUK9 [444-452]		0	1106.61	2.47248e+06	2	0.31	56.3211	32
[K].HVVSLLDSFEHK.[G]		1	6	1	A0A0J9WUK9	A0A0J9WUK9 [122-133]		0	1410.74		3	1.64	57.2787	59
[R].GLSAVAQCESLR.[Y]	1xCarbamidomethyl [C8]	1	1	1	A0A0D2XZN4	A0A0D2XZN4 [98-109]		0	1290.65	10879325	2	3.85	26.0855	54
[R].KRPDQDPSEQESLPASALK.[S]		1	3	2	A0A0J9V3N3	A0A0J9V3N3 [6-24]		1	2096.06		3	-0.66	20.8989	69
[K].GLGALLMGASYEISR.[R]		1	3	1	A0A0J9V3N3	A0A0J9V3N3 [462-476]		0	1537.8	12379753	2	-0.9	56.133	71
[K].KPVISAPENPVHGLPK.[E]	1xGG [K16]	1	1	1	A0A0D2XQE2	A0A0D2XQE2 [255-270]		0	1797		3	6.05	60.99	3
[R].HYFQNTQGIIFVVDSNDR.[D]		1	2	2	A0A0D2X919	A0A0D2X919 [80-97]		0	2153.04	3.44881e+06	2	0.92	55.5581	134
[R].KFLDGLYVSEK.[G]		1	1	1	A0A0J9U592	A0A0J9U592 [172-182]		1	1298.7	4.52389e+06	2	2.78	34.3346	37
[K].GNTGVPGDFGCNMMTVDEDVADKYDYTTTFK.[N]	1xCarbamidomethyl [C11]	1	1	2	A0A0D2Y5A1	A0A0D2Y5A1 [130-160]		1	3448.47	45631150	2	-0.78	53.4119	51
[R].KELGDALKPIAEK.[F]		1	1	1	A0A0D2X8D1	A0A0D2X8D1 [262-274]		1	1411.82		3	-0.74	21.119	44
[R].KDDEVTIVR.[G]		1	1	1	A0A0D2Y910	A0A0D2Y910 [52-60]		1	1074.58	4224871	2	0.06	14.8658	40
[R].KAEDAHAFDVISVK.[I]		1	6	1	A0A0J9WUK9	A0A0J9WUK9 [320-333]		1	1529.8	16610066	3	0.76	28.0838	24
[R].LLQINNGVFVK.[V]		1	1	1	A0A0D2Y2S2	A0A0D2Y2S2 [113-123]		0	1244.74	1.80798e+06	2	2.35	43.6012	47
[K].FDTGAVVMVTGGR.[N]		1	1	1	A0A0D2XGN9	A0A0D2XGN9 [175-187]		0	1309.66	2.132e+06	2	9.33	39.4439	30
[K].ELGINALHIK.[I]		1	2	1	A0A0D2Y2S1	A0A0D2Y2S1 [87-96]		0	1107.65	11737868	2	0.51	52.1877	24
[K].TAAVLAVTEVR.[S]		1	2	1	A0A0D2XH79	A0A0D2XH79 [196-206]		0	1129.66	2.15283e+06	2	-0.46	34.351	22
[K].INFATIDAK.[A]		1	1	1	A0A0D2X8D1	A0A0D2X8D1 [279-287]		0	992.541	20585642	2	2.46	32.1582	38
[K].LTTDEIEK.[M]		1	1	1	A0A0D2XAH7	A0A0D2XAH7 [515-522]		0	948.488	6248868	2	0.36	14.7924	24
[K].GEISALSGGWK.[M]		1	1	1	A0A0D2Y596	A0A0D2Y596 [550-560]		0	1104.57	1.72703e+06	2	-14.47	34.5422	18
[R].FIMESGAK.[G]		1	1	1	A0A0D2XZN4	A0A0D2XZN4 [128-135]		0	882.439	44750564	2	-1.4	19.5262	45
[R].IISSIEQK.[E]		1	3	1	A0A0J9U3V1	A0A0J9U3V1 [63-70]		0	917.53	9700208	2	0.37	17.9573	47
[R].MLDMGFEPQIR.[KR]		1	6	1	A0A0J9VKU8	A0A0J9VKU8 [305-315]		0	1336.64	2.75321e+06	2	-0.25	47.6883	35
[R].VVKPESAEK.[E]		1	6	1	A0A0J9WUK9	A0A0J9WUK9 [212-220]		0	986.552	7041055	2	3.21	6.5073	34
[K].TGSKDLGAK.[D]	1xAcetyl [K4(100)]	1	2	1	A0A0J9V3N3	A0A0J9V3N3 [261-269]	A0A0J9V3N3 1xAcetyl [K264(100)]	1	918.489	11177183	2	0.1	9.873	39
[K].EAFSLFDK.[D]		1	1	1	A0A0C4DHS0	A0A0C4DHS0 [86-93]		0	956.472	6448351	2	0.28	41.3824	51
[RK].GVLLYGPPGTGK.[T]		2	9	1	A0A0D2Y8T0; A0A0D2Y496	A0A0D2Y8T0 [201-212]; A0A0D2Y496 [168-179]		0	1158.65	34789200	2	1.2	34.2549	30
[R].ATDVMIAGK.[V]		1	1	1	A0A0D2XZ51	A0A0D2XZ51 [209-217]		0	905.476	11541674	2	-2.24	17.9161	34
[R].GYLLYGPPGTGK.[S]		1	1	1	A0A0D2XPT7	A0A0D2XPT7 [296-307]		0	1222.65	9671277	2	-1.09	35.8444	29
[R].MTIFAPNETVAK.[S]	1xOxidation [M1]	1	2	1	A0A0J9VK62	A0A0J9VK62 [29-40]		0	1337.68	3.11606e+06	2	2.71	29.7303	17
[R].HLTGEFEK.[K]		1	1	1	A0A0D2X8T7	A0A0D2X8T7 [28-35]		0	960.479	28401392	2	-2.69	11.7156	39
[R].VGVLDESR.[M]		1	1	1	A0A0D2XI69	A0A0D2XI69 [81-88]		0	874.463	11471817	2	1.05	17.6011	51
[K].IESTISDAMAALELNESSAEDLKK.[Q]		1	1	1	A0A0D2XAH7	A0A0D2XAH7 [575-598]		1	2565.26		4	-1.66	55.163	14
[R].EEAINALVR.[Q]		1	1	1	A0A0D2Y2S2	A0A0D2Y2S2 [237-245]		0	1014.56	2.3705e+06	2	-1.01	29.2194	14
[K].NNLLSIIR.[A]		1	2	1	A0A0D2XV06	A0A0D2XV06 [270-277]		0	942.573	1.426e+06	2	-1.47	46.3761	28
[R].DREHHPVVDR.[L]		1	2	1	A0A0J9V3N3	A0A0J9V3N3 [282-291]		1	1259.62	12603479	4	1.52	6.7622	19
[R].MCDPAGFVEGYAIK.[A]	1xCarbamidomethyl [C2]	1	2	1	A0A0J9V3N3	A0A0J9V3N3 [626-639]		0	1557.71	3.72618e+06	2	2.01	48.1462	20
[R].SQVLALSLTDILK.[N]	1xPhospho [S/T]	1	1	1	A0A0D2XDD7	A0A0D2XDD7 [331-343]	A0A0D2XDD7 1xPhospho [S/T]	0	1480.8	4.94223e+06	3	-1.27	31.2384	6
