# Supplementary material for: Acetylation of a fungal effector that translocates host PR1 facilitates virulence
Source: eLife. 2022 Nov 14;11:e82628. doi: 10.7554/eLife.82628 (PMC9681213; doi:10.7554/eLife.82628)
Supplement: Figure 3—source data 2. [file elife-82628-fig3-data2.xlsx]

## Sheet: Fig.3H
Figure 3-source data 2 Detailed Statistical Analysis in Figure 3H.
Dataset					Statistical Analysis
ΔFolSvp1-C	ΔFolSvp1-C4R	ΔFolSvp1-CR			ΔFolSvp1-C4R					ΔFolSvp1-CR
5	4	1			vs.					vs.
3	4	4			ΔFolSvp1-C					ΔFolSvp1-C4R
5	4	5
4	4	2			Paired t test					Paired t test
5	5	4			P value	0.848				P value	0.0347
4	4	3			P value summary	ns				P value summary	*
5	5	4			Significantly different? (P < 0.05)	No				Significantly different? (P < 0.05)	Yes
4	5	3			One- or two-tailed P value?	Two-tailed				One- or two-tailed P value?	Two-tailed
5	3	4			t, df	t=0.1946 df=17				t, df	t=2.296 df=17
5	4	3			Number of pairs	18				Number of pairs	18
3	5	5
4	4	2			How big is the difference?					How big is the difference?
2	5	3			Mean of differences	0.05556				Mean of differences	-0.7778
4	4	4			SD of differences	1.211				SD of differences	1.437
4	4	3			SEM of differences	0.2855				SEM of differences	0.3387
3	2	5			95% confidence interval	-0.5468 to 0.6579				95% confidence interval	-1.492 to -0.06310
4	3	2			R square	0.002222				R square	0.2367
4	5	3
					How effective was the pairing?					How effective was the pairing?
					Correlation coefficient (r)	-0.008999				Correlation coefficient (r)	-0.04142
					P value (one tailed)	0.4859				P value (one tailed)	0.4352
					P value summary	ns				P value summary	ns
					Significant correlation? (P > 0.05)	Yes				Significant correlation? (P > 0.05)	Yes
