# Supplementary material for: Acetylation of a fungal effector that translocates host PR1 facilitates virulence
Source: eLife. 2022 Nov 14;11:e82628. doi: 10.7554/eLife.82628 (PMC9681213; doi:10.7554/eLife.82628)
Supplement: Figure 5—source data 2. [file elife-82628-fig5-data2.xlsx]

## Sheet: Fig.5D
Figure 5-source data 2 Detailed Statistical Analysis in Figure 5D.
Dataset					Statistical Analysis
ΔFolSvp1-C	ΔFolSvp1-Cnls1	ΔFolSvp1-Cnls2			ΔFolSvp1-Cnls1				ΔFolSvp1-Cnls2
5	4	5			vs.				vs.
3	4	4			ΔFolSvp1-C				ΔFolSvp1-Cnls1
5	2	5
5	3	4			Paired t test				Paired t test
3	1	5			P value	0.0032			P value	0.035
4	4	4			P value summary	**			P value summary	*
5	3	4			Significantly different? (P < 0.05)	Yes			Significantly different? (P < 0.05)	Yes
5	4	4			One- or two-tailed P value?	Two-tailed			One- or two-tailed P value?	Two-tailed
4	2	3			t, df	t=3.431 df=17			t, df	t=2.291 df=17
4	3	4			Number of pairs	18			Number of pairs	18
3	4	4
4	3	5			How big is the difference?				How big is the difference?
5	3	4			Mean of differences	-1			Mean of differences	0.8333
5	5	3			SD of differences	1.237			SD of differences	1.543
4	4	4			SEM of differences	0.2915			SEM of differences	0.3638
4	5	3			95% confidence interval	-1.615 to -0.3850			95% confidence interval	0.06577 to 1.601
5	3	4			R square	0.4091			R square	0.2358
4	2	5
					How effective was the pairing?				How effective was the pairing?
					Correlation coefficient (r)	0.1174			Correlation coefficient (r)	-0.5308
					P value (one tailed)	0.3214			P value (one tailed)	0.0117
					P value summary	ns			P value summary	*
					Significant correlation? (P > 0.05)	Yes			Significant correlation? (P > 0.05)	No

## Sheet: Fig.5G
Figure 5-source data 2 Detailed Statistical Analysis in Figure 5G.
Dataset
FolSvp1-GFP	SPFolSvp1-GFP	SPFolSvp1Q-GFP	SPFolSvp1R-GFP
1	1.16795	1.07128	0.916908
1	1.20849	1.01014	0.980454
1	1.00537	0.820284	0.966675
1	0.88398	0.935121	1.07221
Statistical Analysis
ANOVA summary								Number of families	1
F	0.8769							Number of comparisons per family	6
P value	0.4802							Alpha	0.05
P value summary	ns
Are differences among means statistically significant? (P < 0.05)	No							Tukey's multiple comparisons test	Mean Diff.	95% CI of diff.	Significant?	Summary
R square	0.1798
								FolSvp1-GFP vs. SPFolSvp1-GFP	-0.06645	-0.2721 to 0.1392	No	ns
Brown-Forsythe test								FolSvp1-GFP vs. SPFolSvp1Q-GFP	0.04079	-0.1648 to 0.2464	No	ns
F (DFn, DFd)	5.260 (3, 12)							FolSvp1-GFP vs. SPFolSvp1R-GFP	0.01594	-0.1897 to 0.2216	No	ns
P value	0.0151							SPFolSvp1-GFP vs. SPFolSvp1Q-GFP	0.1072	-0.09839 to 0.3129	No	ns
P value summary	*							SPFolSvp1-GFP vs. SPFolSvp1R-GFP	0.08239	-0.1232 to 0.2880	No	ns
Significantly different standard deviations? (P < 0.05)	Yes							SPFolSvp1Q-GFP vs. SPFolSvp1R-GFP	-0.02485	-0.2305 to 0.1808	No	ns
Bartlett's test
Bartlett's statistic (corrected)	+infinity							Test details	Mean 1	Mean 2	Mean Diff.	SE of diff.	n1	n2	q	DF
P value	< 0.0001
P value summary	****							FolSvp1-GFP vs. SPFolSvp1-GFP	1	1.066	-0.06645	0.06926	4	4	1.357	12
Significantly different standard deviations? (P < 0.05)	Yes							FolSvp1-GFP vs. SPFolSvp1Q-GFP	1	0.9592	0.04079	0.06926	4	4	0.8329	12
								FolSvp1-GFP vs. SPFolSvp1R-GFP	1	0.9841	0.01594	0.06926	4	4	0.3255	12
ANOVA table	SS	DF	MS	F (DFn, DFd)	P value			SPFolSvp1-GFP vs. SPFolSvp1Q-GFP	1.066	0.9592	0.1072	0.06926	4	4	2.19	12
Treatment (between columns)	0.02524	3	0.008413	F (3, 12) = 0.8769	P = 0.4802			SPFolSvp1-GFP vs. SPFolSvp1R-GFP	1.066	0.9841	0.08239	0.06926	4	4	1.682	12
Residual (within columns)	0.1151	12	0.009594					SPFolSvp1Q-GFP vs. SPFolSvp1R-GFP	0.9592	0.9841	-0.02485	0.06926	4	4	0.5075	12
Total	0.1404	15
Data summary
Number of treatments (columns)	4
Number of values (total)	16

## Sheet: Fig.5I
Figure 5-source data 2 Detailed Statistical Analysis in Figure 5I.
Dataset
SP+PR1SPFolSvp1-GFP	SP+PR1SPFolSvp1Q-GFP	SP+PR1SPFolSvp1R-GFP	SP+PR1SPFolSvp1-GFP	SP+PR1SPFolSvp1Q-GFP	SP+PR1SPFolSvp1R-GFP
1	3.41079	3.81659	1.00001	1.0321	1.25256
1.0001	2.75999	2.54582	0.999895	0.769984	1.28671
0.999999	2.89262	3.2835	1	0.875143	1.37065
1	3.07572	3.06933	1.00066	1.10103	0.77243
1	3.4811	3.12825
0.999998	2.6456	2.73045
0.999999	3.20553	2.73328
1	2.34863	2.22298
Statistical Analysis
ANOVA summary								Number of families	1
F	65.93							Number of comparisons per family	15
P value	< 0.0001							Alpha	0.05
P value summary	****
Are differences among means statistically significant? (P < 0.05)	Yes							Tukey's multiple comparisons test	Mean Diff.	95% CI of diff.	Significant?	Summary	Adjusted P Value
R square	0.9166
								SP+PR1SPFolSvp1Q-GFP vs. SP+PR1SPFolSvp1-GFP	1.977	1.493 to 2.462	Yes	****	< 0.0001
Brown-Forsythe test								SP+PR1SPFolSvp1R-GFP vs. SP+PR1SPFolSvp1-GFP	1.941	1.457 to 2.426	Yes	****	< 0.0001
F (DFn, DFd)	5.471 (5, 30)							SP+PR1SPFolSvp1-GFP vs. SP+PR1SPFolSvp1-GFP	0.00013	-0.5932 to 0.5934	No	ns	> 0.9999
P value	0.0011							SP+PR1SPFolSvp1Q-GFP vs. SP+PR1SPFolSvp1-GFP	-0.05545	-0.6488 to 0.5379	No	ns	0.9997
P value summary	**							SP+PR1SPFolSvp1R-GFP vs. SP+PR1SPFolSvp1-GFP	0.1706	-0.4227 to 0.7639	No	ns	0.9497
Significantly different standard deviations? (P < 0.05)	Yes							SP+PR1SPFolSvp1R-GFP vs. SP+PR1SPFolSvp1Q-GFP	-0.03622	-0.5207 to 0.4482	No	ns	> 0.9999
								SP+PR1SPFolSvp1-GFP vs. SP+PR1SPFolSvp1Q-GFP	-1.977	-2.571 to -1.384	Yes	****	< 0.0001
Bartlett's test								SP+PR1SPFolSvp1Q-GFP vs. SP+PR1SPFolSvp1Q-GFP	-2.033	-2.626 to -1.440	Yes	****	< 0.0001
Bartlett's statistic (corrected)	151							SP+PR1SPFolSvp1R-GFP vs. SP+PR1SPFolSvp1Q-GFP	-1.807	-2.400 to -1.214	Yes	****	< 0.0001
P value	< 0.0001							SP+PR1SPFolSvp1-GFP vs. SP+PR1SPFolSvp1R-GFP	-1.941	-2.534 to -1.348	Yes	****	< 0.0001
P value summary	****							SP+PR1SPFolSvp1Q-GFP vs. SP+PR1SPFolSvp1R-GFP	-1.997	-2.590 to -1.403	Yes	****	< 0.0001
Significantly different standard deviations? (P < 0.05)	Yes							SP+PR1SPFolSvp1R-GFP vs. SP+PR1SPFolSvp1R-GFP	-1.771	-2.364 to -1.177	Yes	****	< 0.0001
								SP+PR1SPFolSvp1Q-GFP vs. SP+PR1SPFolSvp1-GFP	-0.05558	-0.7407 to 0.6295	No	ns	0.9999
ANOVA table	SS	DF	MS	F (DFn, DFd)	P value			SP+PR1SPFolSvp1R-GFP vs. SP+PR1SPFolSvp1-GFP	0.1704	-0.5146 to 0.8555	No	ns	0.9726
Treatment (between columns)	33.45	5	6.69	F (5, 30) = 65.93	P < 0.0001			SP+PR1SPFolSvp1R-GFP vs. SP+PR1SPFolSvp1Q-GFP	0.226	-0.4591 to 0.9111	No	ns	0.9131
Residual (within columns)	3.044	30	0.1015
Total	36.49	35
								Test details	Mean 1	Mean 2	Mean Diff.	SE of diff.	n1	n2	q	DF
Data summary
Number of treatments (columns)	6							SP+PR1SPFolSvp1Q-GFP vs. SP+PR1SPFolSvp1-GFP	2.977	1	1.977	0.1593	8	8	17.56	30
Number of values (total)	36							SP+PR1SPFolSvp1R-GFP vs. SP+PR1SPFolSvp1-GFP	2.941	1	1.941	0.1593	8	8	17.24	30
								SP+PR1SPFolSvp1-GFP vs. SP+PR1SPFolSvp1-GFP	1	1	0.00013	0.1951	4	8	0.0009425	30
								SP+PR1SPFolSvp1Q-GFP vs. SP+PR1SPFolSvp1-GFP	0.9446	1	-0.05545	0.1951	4	8	0.402	30
								SP+PR1SPFolSvp1R-GFP vs. SP+PR1SPFolSvp1-GFP	1.171	1	0.1706	0.1951	4	8	1.237	30
								SP+PR1SPFolSvp1R-GFP vs. SP+PR1SPFolSvp1Q-GFP	2.941	2.977	-0.03622	0.1593	8	8	0.3216	30
								SP+PR1SPFolSvp1-GFP vs. SP+PR1SPFolSvp1Q-GFP	1	2.977	-1.977	0.1951	4	8	14.34	30
								SP+PR1SPFolSvp1Q-GFP vs. SP+PR1SPFolSvp1Q-GFP	0.9446	2.977	-2.033	0.1951	4	8	14.74	30
								SP+PR1SPFolSvp1R-GFP vs. SP+PR1SPFolSvp1Q-GFP	1.171	2.977	-1.807	0.1951	4	8	13.1	30
								SP+PR1SPFolSvp1-GFP vs. SP+PR1SPFolSvp1R-GFP	1	2.941	-1.941	0.1951	4	8	14.07	30
								SP+PR1SPFolSvp1Q-GFP vs. SP+PR1SPFolSvp1R-GFP	0.9446	2.941	-1.997	0.1951	4	8	14.48	30
								SP+PR1SPFolSvp1R-GFP vs. SP+PR1SPFolSvp1R-GFP	1.171	2.941	-1.771	0.1951	4	8	12.84	30
								SP+PR1SPFolSvp1Q-GFP vs. SP+PR1SPFolSvp1-GFP	0.9446	1	-0.05558	0.2252	4	4	0.349	30
								SP+PR1SPFolSvp1R-GFP vs. SP+PR1SPFolSvp1-GFP	1.171	1	0.1704	0.2252	4	4	1.07	30
								SP+PR1SPFolSvp1R-GFP vs. SP+PR1SPFolSvp1Q-GFP	1.171	0.9446	0.226	0.2252	4	4	1.419	30

## Sheet: Fig.5K
Figure 5-source data 2 Detailed Statistical Analysis in Figure 5K.
Dataset
SP+PR1SPFolSvp1-GFP	SP+PR1SPFolSvp1Q-GFP	SP+PR1SPFolSvp1R-GFP	SP+PR1SPFolSvp1-GFP	SP+PR1SPFolSvp1Q-GFP	SP+PR1SPFolSvp1R-GFP
1	2.54739	2.56386	3.29748	3.1357	3.10858
1	2.84619	3.07531	2.85855	2.35009	2.79201
1	3.13129	2.76797	3.2354	3.34223	3.35223
1	3.19402	3.46881	3.34992	3.41912	3.36494
Statistical Analysis
ANOVA summary						Number of families	1
F	28.48					Number of comparisons per family	15
P value	< 0.0001					Alpha	0.05
P value summary	****
Are differences among means statistically significant? (P < 0.05)	Yes					Tukey's multiple comparisons test	Mean Diff.	95% CI of diff.	Significant?	Summary	Adjusted P Value
R square	0.8878
						SP+PR1SPFolSvp1Q-GFP vs. SP+PR1SPFolSvp1-GFP	1.93	1.216 to 2.643	Yes	****	< 0.0001
Brown-Forsythe test						SP+PR1SPFolSvp1R-GFP vs. SP+PR1SPFolSvp1-GFP	1.969	1.256 to 2.682	Yes	****	< 0.0001
F (DFn, DFd)	1.291 (5, 18)					SP+PR1SPFolSvp1-GFP vs. SP+PR1SPFolSvp1-GFP	2.185	1.472 to 2.899	Yes	****	< 0.0001
P value	0.311					SP+PR1SPFolSvp1Q-GFP vs. SP+PR1SPFolSvp1-GFP	2.062	1.349 to 2.775	Yes	****	< 0.0001
P value summary	ns					SP+PR1SPFolSvp1R-GFP vs. SP+PR1SPFolSvp1-GFP	2.154	1.441 to 2.868	Yes	****	< 0.0001
Significantly different standard deviations? (P < 0.05)	No					SP+PR1SPFolSvp1R-GFP vs. SP+PR1SPFolSvp1Q-GFP	0.03926	-0.6740 to 0.7525	No	ns	> 0.9999
						SP+PR1SPFolSvp1-GFP vs. SP+PR1SPFolSvp1Q-GFP	0.2556	-0.4577 to 0.9689	No	ns	0.8588
Bartlett's test						SP+PR1SPFolSvp1Q-GFP vs. SP+PR1SPFolSvp1Q-GFP	0.1321	-0.5812 to 0.8453	No	ns	0.9906
Bartlett's statistic (corrected)	+infinity					SP+PR1SPFolSvp1R-GFP vs. SP+PR1SPFolSvp1Q-GFP	0.2247	-0.4886 to 0.9380	No	ns	0.9116
P value	< 0.0001					SP+PR1SPFolSvp1-GFP vs. SP+PR1SPFolSvp1R-GFP	0.2163	-0.4969 to 0.9296	No	ns	0.9235
P value summary	****					SP+PR1SPFolSvp1Q-GFP vs. SP+PR1SPFolSvp1R-GFP	0.0928	-0.6205 to 0.8061	No	ns	0.9982
Significantly different standard deviations? (P < 0.05)	Yes					SP+PR1SPFolSvp1R-GFP vs. SP+PR1SPFolSvp1R-GFP	0.1855	-0.5278 to 0.8987	No	ns	0.9587
						SP+PR1SPFolSvp1Q-GFP vs. SP+PR1SPFolSvp1-GFP	-0.1235	-0.8368 to 0.5897	No	ns	0.993
ANOVA table	SS	DF	MS	F (DFn, DFd)	P value	SP+PR1SPFolSvp1R-GFP vs. SP+PR1SPFolSvp1-GFP	-0.03089	-0.7442 to 0.6824	No	ns	> 0.9999
Treatment (between columns)	14.35	5	2.869	F (5, 18) = 28.48	P < 0.0001	SP+PR1SPFolSvp1R-GFP vs. SP+PR1SPFolSvp1Q-GFP	0.09265	-0.6206 to 0.8059	No	ns	0.9982
Residual (within columns)	1.813	18	0.1007
Total	16.16	23
						Test details	Mean 1	Mean 2	Mean Diff.	SE of diff.	n1	n2	q	DF
Data summary
Number of treatments (columns)	6					SP+PR1SPFolSvp1Q-GFP vs. SP+PR1SPFolSvp1-GFP	2.93	1	1.93	0.2244	4	4	12.16	18
Number of values (total)	24					SP+PR1SPFolSvp1R-GFP vs. SP+PR1SPFolSvp1-GFP	2.969	1	1.969	0.2244	4	4	12.41	18
						SP+PR1SPFolSvp1-GFP vs. SP+PR1SPFolSvp1-GFP	3.185	1	2.185	0.2244	4	4	13.77	18
						SP+PR1SPFolSvp1Q-GFP vs. SP+PR1SPFolSvp1-GFP	3.062	1	2.062	0.2244	4	4	12.99	18
						SP+PR1SPFolSvp1R-GFP vs. SP+PR1SPFolSvp1-GFP	3.154	1	2.154	0.2244	4	4	13.58	18
						SP+PR1SPFolSvp1R-GFP vs. SP+PR1SPFolSvp1Q-GFP	2.969	2.93	0.03926	0.2244	4	4	0.2474	18
						SP+PR1SPFolSvp1-GFP vs. SP+PR1SPFolSvp1Q-GFP	3.185	2.93	0.2556	0.2244	4	4	1.611	18
						SP+PR1SPFolSvp1Q-GFP vs. SP+PR1SPFolSvp1Q-GFP	3.062	2.93	0.1321	0.2244	4	4	0.8321	18
						SP+PR1SPFolSvp1R-GFP vs. SP+PR1SPFolSvp1Q-GFP	3.154	2.93	0.2247	0.2244	4	4	1.416	18
						SP+PR1SPFolSvp1-GFP vs. SP+PR1SPFolSvp1R-GFP	3.185	2.969	0.2163	0.2244	4	4	1.363	18
						SP+PR1SPFolSvp1Q-GFP vs. SP+PR1SPFolSvp1R-GFP	3.062	2.969	0.0928	0.2244	4	4	0.5847	18
						SP+PR1SPFolSvp1R-GFP vs. SP+PR1SPFolSvp1R-GFP	3.154	2.969	0.1855	0.2244	4	4	1.169	18
						SP+PR1SPFolSvp1Q-GFP vs. SP+PR1SPFolSvp1-GFP	3.062	3.185	-0.1235	0.2244	4	4	0.7785	18
						SP+PR1SPFolSvp1R-GFP vs. SP+PR1SPFolSvp1-GFP	3.154	3.185	-0.03089	0.2244	4	4	0.1947	18
						SP+PR1SPFolSvp1R-GFP vs. SP+PR1SPFolSvp1Q-GFP	3.154	3.062	0.09265	0.2244	4	4	0.5838	18
