# Supplementary material for: Acetylation of a fungal effector that translocates host PR1 facilitates virulence
Source: eLife. 2022 Nov 14;11:e82628. doi: 10.7554/eLife.82628 (PMC9681213; doi:10.7554/eLife.82628)
Supplement: Figure 6—source data 2. [file elife-82628-fig6-data2.xlsx]

## Sheet: Fig.6A
Figure 6-source data 2 Detailed Statistical Analysis in Figure 6A.
Dataset
Cotyledon	Root	Leaf	Flower	Green fruit	Red fruit
1	136.239	0.309927	2091.03	18.6357	1314.23
1	106.891	0.25	1978.24	12.996	1089.91
1	183.546	0.293209	2179.83	16.2233	1024
Statistical Analysis
Root			Leaf			Flower			Green fruit			Red fruit
vs.			vs.			vs.			vs.			vs.
Cotyledon			Cotyledon			Cotyledon			Cotyledon			Cotyledon
Unpaired t test			Unpaired t test			Unpaired t test			Unpaired t test			Unpaired t test
P value	0.0032		P value	< 0.0001		P value	< 0.0001		P value	0.0008		P value	0.0002
P value summary	**		P value summary	****		P value summary	****		P value summary	***		P value summary	***
Significantly different? (P < 0.05)	Yes		Significantly different? (P < 0.05)	Yes		Significantly different? (P < 0.05)	Yes		Significantly different? (P < 0.05)	Yes		Significantly different? (P < 0.05)	Yes
One- or two-tailed P value?	Two-tailed		One- or two-tailed P value?	Two-tailed		One- or two-tailed P value?	Two-tailed		One- or two-tailed P value?	Two-tailed		One- or two-tailed P value?	Two-tailed
t, df	t=6.325 df=4		t, df	t=40.08 df=4		t, df	t=35.69 df=4		t, df	t=9.152 df=4		t, df	t=13.00 df=4
How big is the difference?			How big is the difference?			How big is the difference?			How big is the difference?			How big is the difference?
Mean ± SEM of column A	1.000 ± 0.0 N=3		Mean ± SEM of column A	1.000 ± 0.0 N=3		Mean ± SEM of column A	1.000 ± 0.0 N=3		Mean ± SEM of column A	1.000 ± 0.0 N=3		Mean ± SEM of column A	1.000 ± 0.0 N=3
Mean ± SEM of column B	142.2 ± 22.33 N=3		Mean ± SEM of column C	0.2844 ± 0.01785 N=3		Mean ± SEM of column D	2083 ± 58.33 N=3		Mean ± SEM of column E	15.95 ± 1.634 N=3		Mean ± SEM of column F	1143 ± 87.84 N=3
Difference between means	141.2 ± 22.33		Difference between means	-0.7156 ± 0.01785		Difference between means	2082 ± 58.33		Difference between means	14.95 ± 1.634		Difference between means	1142 ± 87.84
95% confidence interval	79.23 to 203.2		95% confidence interval	-0.7652 to -0.6661		95% confidence interval	1920 to 2244		95% confidence interval	10.42 to 19.49		95% confidence interval	897.8 to 1386
R square	0.9091		R square	0.9975		R square	0.9969		R square	0.9544		R square	0.9769
F test to compare variances			F test to compare variances			F test to compare variances			F test to compare variances			F test to compare variances
F,DFn, Dfd			F,DFn, Dfd			F,DFn, Dfd			F,DFn, Dfd			F,DFn, Dfd
P value			P value			P value			P value			P value
P value summary			P value summary			P value summary			P value summary			P value summary
Significantly different? (P < 0.05)			Significantly different? (P < 0.05)			Significantly different? (P < 0.05)			Significantly different? (P < 0.05)			Significantly different? (P < 0.05)

## Sheet: Fig.6B
Figure 6-source data 2 Detailed Statistical Analysis in Figure 6B.
Dataset
0	1	2	3	4	5
1	1	5.50217	16	12.6407	9.64646
1	0.50698	5.35171	11.7127	6.54322	8.33973
1	0.82932	4.95883	13.6422	7.78124	7.3615
Statistical Analysis
1			2			3			4			5
vs.			vs.			vs.			vs.			vs.
0			0			0			0			0
Unpaired t test			Unpaired t test			Unpaired t test			Unpaired t test			Unpaired t test
P value	0.2006		P value	< 0.0001		P value	0.0005		P value	0.0127		P value	0.0004
P value summary	ns		P value summary	****		P value summary	***		P value summary	*		P value summary	***
Significantly different? (P < 0.05)	No		Significantly different? (P < 0.05)	Yes		Significantly different? (P < 0.05)	Yes		Significantly different? (P < 0.05)	Yes		Significantly different? (P < 0.05)	Yes
One- or two-tailed P value?	Two-tailed		One- or two-tailed P value?	Two-tailed		One- or two-tailed P value?	Two-tailed		One- or two-tailed P value?	Two-tailed		One- or two-tailed P value?	Two-tailed
t, df	t=1.530 df=4		t, df	t=26.37 df=4		t, df	t=10.31 df=4		t, df	t=4.293 df=4		t, df	t=11.25 df=4
How big is the difference?			How big is the difference?			How big is the difference?			How big is the difference?			How big is the difference?
Mean ± SEM of column A	1.000 ± 0.0 N=3		Mean ± SEM of column A	1.000 ± 0.0 N=3		Mean ± SEM of column A	1.000 ± 0.0 N=3		Mean ± SEM of column A	1.000 ± 0.0 N=3		Mean ± SEM of column A	1.000 ± 0.0 N=3
Mean ± SEM of column B	0.7788 ± 0.1445 N=3		Mean ± SEM of column C	5.271 ± 0.1620 N=3		Mean ± SEM of column D	13.78 ± 1.240 N=3		Mean ± SEM of column E	8.988 ± 1.861 N=3		Mean ± SEM of column F	8.449 ± 0.6619 N=3
Difference between means	-0.2212 ± 0.1445		Difference between means	4.271 ± 0.1620		Difference between means	12.78 ± 1.240		Difference between means	7.988 ± 1.861		Difference between means	7.449 ± 0.6619
95% confidence interval	-0.6226 to 0.1801		95% confidence interval	3.821 to 4.721		95% confidence interval	9.343 to 16.23		95% confidence interval	2.822 to 13.15		95% confidence interval	5.612 to 9.287
R square	0.3693		R square	0.9943		R square	0.9638		R square	0.8217		R square	0.9694
F test to compare variances			F test to compare variances			F test to compare variances			F test to compare variances			F test to compare variances
F,DFn, Dfd			F,DFn, Dfd			F,DFn, Dfd			F,DFn, Dfd			F,DFn, Dfd
P value			P value			P value			P value			P value
P value summary			P value summary			P value summary			P value summary			P value summary
Significantly different? (P < 0.05)			Significantly different? (P < 0.05)			Significantly different? (P < 0.05)			Significantly different? (P < 0.05)			Significantly different? (P < 0.05)

## Sheet: Fig.6G
Figure 6-source data 2 Detailed Statistical Analysis in Figure 6G.
Dataset					Statistical Analysis
Mock	WT	SlPR1 (OE)	CAPE1SlPR1 (OE)		SlPR1 (OE)				CAPE1SlPR1 (OE)	CAPE1SlPR1 (OE)			CAPE1SlPR1 (OE)	CAPE1SlPR1 (OE)
0	5	1	4		vs.				vs.	vs.			vs.	vs.
0	3	4	5		WT				WT	WT			SlPR1 (OE)	SlPR1 (OE)
0	5	3	3
0	3	4	4		Paired t test				Paired t test				Paired t test
0	5	3	5		P value	0.0066			P value	0.8743			P value	0.0027
0	4	2	2		P value summary	**			P value summary	ns			P value summary	**
0	5	3	5		Significantly different? (P < 0.05)	Yes			Significantly different? (P < 0.05)	No			Significantly different? (P < 0.05)	Yes
0	4	4	4		One- or two-tailed P value?	Two-tailed			One- or two-tailed P value?	Two-tailed			One- or two-tailed P value?	Two-tailed
0	5	4	4		t, df	t=3.047 df=19			t, df	t=0.1603 df=19			t, df	t=3.454 df=19
0	5	3	5		Number of pairs	20			Number of pairs	20			Number of pairs	20
0	4	3	4
0	5	2	4		How big is the difference?				How big is the difference?				How big is the difference?
0	5	4	3		Mean of differences	-0.95			Mean of differences	-0.05			Mean of differences	0.9
0	3	3	4		SD of differences	1.395			SD of differences	1.395			SD of differences	1.165
0	4	4	4		SEM of differences	0.3118			SEM of differences	0.3118			SEM of differences	0.2606
0	2	3	5		95% confidence interval	-1.603 to -0.2973			95% confidence interval	-0.7027 to 0.6027			95% confidence interval	0.3546 to 1.445
0	4	5	5		R square	0.3282			R square	0.001351			R square	0.3857
0	4	3	5
0	5	4	3		How effective was the pairing?				How effective was the pairing?				How effective was the pairing?
0	4	3	5		Correlation coefficient (r)	-0.1939			Correlation coefficient (r)	-0.2421			Correlation coefficient (r)	0.1486
					P value (one tailed)	0.2064			P value (one tailed)	0.1519			P value (one tailed)	0.2659
					P value summary	ns			P value summary	ns			P value summary	ns
					Significant correlation? (P > 0.05)	Yes			Significant correlation? (P > 0.05)	Yes			Significant correlation? (P > 0.05)	Yes

## Sheet: Fig.6I
Figure 6-source data 2 Detailed Statistical Analysis in Figure 6I.
Dataset				Statistical Analysis
Water	CAPE1			CAPE1
5	3			vs.
4	4			Water
3	5
5	4			Paired t test
4	3			P value	0.0174
4	5			P value summary	*
2	3			Significantly different? (P < 0.05)	Yes
4	4			One- or two-tailed P value?	Two-tailed
5	2			t, df	t=2.523 df=29
5	4			Number of pairs	30
4	3
5	3			How big is the difference?
3	4			Mean of differences	-0.6
5	2			SD of differences	1.303
4	3			SEM of differences	0.2378
5	4			95% confidence interval	-1.086 to -0.1136
4	5			R square	0.18
5	3
5	4			How effective was the pairing?
5	3			Correlation coefficient (r)	-0.2139
4	4			P value (one tailed)	0.1282
3	3			P value summary	ns
4	4			Significant correlation? (P > 0.05)	Yes
5	5
4	4
5	4
5	3
3	5
4	3
5	4
