# Supplementary material for: Acetylation of a fungal effector that translocates host PR1 facilitates virulence
Source: eLife. 2022 Nov 14;11:e82628. doi: 10.7554/eLife.82628 (PMC9681213; doi:10.7554/eLife.82628)
Supplement: Figure 7—source data 2. [file elife-82628-fig7-data2.xlsx]

## Sheet: Fig.7H
Figure 7-source data 2 Detailed Statistical Analysis in Figure 7H.
Dataset						Statistical Analysis
Mock	WT	NLS-SPSlPR1 (OE)	SlPR1 (OE)			ANOVA summary								Number of families	1
0	5	5	1			F	132.5							Number of comparisons per family	6
0	3	4	4			P value	< 0.0001							Alpha	0.05
0	5	3	3			P value summary	****
0	3	4	4			Are differences among means statistically significant? (P < 0.05)	Yes							Tukey's multiple comparisons test	Mean Diff.	95% CI of diff.	Significant?	Summary	Adjusted P Value
0	5	4	3			R square	0.8395
0	4	5	2											Mock vs. WT	-4.2	-4.839 to -3.561	Yes	****	< 0.0001
0	5	5	3			Brown-Forsythe test								Mock vs. NLS-SPSlPR1 (OE)	-4.15	-4.789 to -3.511	Yes	****	< 0.0001
0	4	5	3			F (DFn, DFd)	7.568 (3, 76)							Mock vs. SlPR1 (OE)	-3.2	-3.839 to -2.561	Yes	****	< 0.0001
0	5	3	4			P value	0.0002							WT vs. NLS-SPSlPR1 (OE)	0.05	-0.5888 to 0.6888	No	ns	0.9969
0	5	5	3			P value summary	***							WT vs. SlPR1 (OE)	1	0.3612 to 1.639	Yes	***	0.0006
0	4	4	3			Significantly different standard deviations? (P < 0.05)	Yes							NLS-SPSlPR1 (OE) vs. SlPR1 (OE)	0.95	0.3112 to 1.589	Yes	**	0.0011
0	5	5	2
0	5	5	4			Bartlett's test
0	3	3	3			Bartlett's statistic (corrected)	+infinity							Test details	Mean 1	Mean 2	Mean Diff.	SE of diff.	n1	n2	q	DF
0	4	4	4			P value	< 0.0001
0	2	2	3			P value summary	****							Mock vs. WT	0	4.2	-4.2	0.2432	20	20	24.42	76
0	4	4	5			Significantly different standard deviations? (P < 0.05)	Yes							Mock vs. NLS-SPSlPR1 (OE)	0	4.15	-4.15	0.2432	20	20	24.13	76
0	4	4	3											Mock vs. SlPR1 (OE)	0	3.2	-3.2	0.2432	20	20	18.61	76
0	5	5	4			ANOVA table	SS	DF	MS	F (DFn, DFd)	P value			WT vs. NLS-SPSlPR1 (OE)	4.2	4.15	0.05	0.2432	20	20	0.2908	76
0	4	4	3			Treatment (between columns)	235	3	78.35	F (3, 76) = 132.5	P < 0.0001			WT vs. SlPR1 (OE)	4.2	3.2	1	0.2432	20	20	5.815	76
						Residual (within columns)	44.95	76	0.5914					NLS-SPSlPR1 (OE) vs. SlPR1 (OE)	4.15	3.2	0.95	0.2432	20	20	5.524	76
						Total	280	79
						Data summary
						Number of treatments (columns)	4
						Number of values (total)	80

## Sheet: Fig.7K
Figure 7-source data 2 Detailed Statistical Analysis in Figure 7K.
Dataset			Statistical Analysis
Fol	FolSVP1 (OE)		FolSVP1 (OE)
3	5		vs.
4	2		Fol
5	3
3	4		Paired t test
2	5		P value	0.0119
5	5		P value summary	*
4	3		Significantly different? (P < 0.05)	Yes
3	4		One- or two-tailed P value?	Two-tailed
3	4		t, df	t=2.733 df=23
4	3		Number of pairs	24
1	5
3	4		How big is the difference?
2	4		Mean of differences	0.8333
4	3		SD of differences	1.494
3	5		SEM of differences	0.305
2	4		95% confidence interval	0.2025 to 1.464
3	4		R square	0.2451
4	5
3	4		How effective was the pairing?
4	4		Correlation coefficient (r)	-0.3789
3	3		P value (one tailed)	0.0339
3	4		P value summary	*
2	4		Significant correlation? (P > 0.05)	No
3	5		Data summary
			Number of treatments (columns)	4
			Number of values (total)	80
