# Supplementary material for: Acetylation of a fungal effector that translocates host PR1 facilitates virulence
Source: eLife. 2022 Nov 14;11:e82628. doi: 10.7554/eLife.82628 (PMC9681213; doi:10.7554/eLife.82628)
Supplement: Supplementary file 1. — (a) Target proteins obtained from the Fol-Secreted Virulence-related Protein1 (FolSvp1)-GFP co-purified liquid chromatography-tandem mass spectrometry (LC-MS/MS) data. (b) Target proteins obtained from the GFP co-purified LC-MS/MS data. (c) Primers used in this study. (d) Synthesized genes used in yeast two-hybrid (Y2H) study. [file elife-82628-supp1.xlsx]

## Sheet: Supplementary File 1a
Supplementary File 1. Target proteins obtained from the FolSvp1-GFP copurified LC-MS/MS data.
ID	Reference	PepCount	UniquePepCount	CoverPercent	MW	PI
$1-1	tr|A0A0D2Y973|A0A0D2Y973_FUSO4 Nucleolar protein 58 OS=Fusarium oxysporum f. sp. lycopersici (strain 4287 / CBS 123668 / FGSC 9935 / NRRL 34936) OX=426428 GN=FOXG_12843 PE=3 SV=1	50	25	0.5025	65284	6.59
$2-1	tr|A0A0D2Y8Z1|A0A0D2Y8Z1_FUSO4 5-methyltetrahydropteroyltriglutamate--homocysteine S-methyltransferase OS=Fusarium oxysporum f. sp. lycopersici (strain 4287 / CBS 123668 / FGSC 9935 / NRRL 34936) OX=426428 GN=FOXG_12759 PE=3 SV=1	48	24	0.3407	86550.5	5.9
$3-1	tr|A0A0D2XAH7|A0A0D2XAH7_FUSO4 Heat shock protein SSB1 OS=Fusarium oxysporum f. sp. lycopersici (strain 4287 / CBS 123668 / FGSC 9935 / NRRL 34936) OX=426428 GN=FOXG_00893 PE=3 SV=1	49	22	0.4121	66769.9	5.24
$4-1	tr|A0A0D2Y2W7|A0A0D2Y2W7_FUSO4 ATP-dependent RNA helicase DBP3 OS=Fusarium oxysporum f. sp. lycopersici (strain 4287 / CBS 123668 / FGSC 9935 / NRRL 34936) OX=426428 GN=FOXG_10616 PE=3 SV=1	30	20	0.3771	64836.4	9.1
$5-1	tr|A0A0D2XA80|A0A0D2XA80_FUSO4 Hsp70-like protein OS=Fusarium oxysporum f. sp. lycopersici (strain 4287 / CBS 123668 / FGSC 9935 / NRRL 34936) OX=426428 GN=FOXG_00795 PE=3 SV=1	36	19	0.3313	71007.1	5
$6-1	tr|A0A0D2X8U9|A0A0D2X8U9_FUSO4 ATP synthase subunit alpha OS=Fusarium oxysporum f. sp. lycopersici (strain 4287 / CBS 123668 / FGSC 9935 / NRRL 34936) OX=426428 GN=FOXG_00308 PE=3 SV=1	34	19	0.274	67271.1	9.55
$7-1	tr|A0A0D2XEN9|A0A0D2XEN9_FUSO4 Biotin carboxylase OS=Fusarium oxysporum f. sp. lycopersici (strain 4287 / CBS 123668 / FGSC 9935 / NRRL 34936) OX=426428 GN=FOXG_02375 PE=4 SV=1	21	19	0.0907	245085	5.74
$8-1	tr|A0A0D2Y4T6|A0A0D2Y4T6_FUSO4 Plasma membrane ATPase OS=Fusarium oxysporum f. sp. lycopersici (strain 4287 / CBS 123668 / FGSC 9935 / NRRL 34936) OX=426428 GN=FOXG_11289 PE=3 SV=1	32	18	0.2156	99859.8	4.97
$9-1	tr|A0A0J9WHE4|A0A0J9WHE4_FUSO4 Pyruvate carboxylase OS=Fusarium oxysporum f. sp. lycopersici (strain 4287 / CBS 123668 / FGSC 9935 / NRRL 34936) OX=426428 GN=FOXG_01733 PE=4 SV=1	22	18	0.1704	131354	5.98
$10-1	tr|A0A0D2XMC9|A0A0D2XMC9_FUSO4 Acetyltransferase OS=Fusarium oxysporum f. sp. lycopersici (strain 4287 / CBS 123668 / FGSC 9935 / NRRL 34936) OX=426428 GN=FOXG_05106 PE=4 SV=1	64	16	0.6696	25672.8	5.45
$11-1	tr|A0A0D2Y9B3|A0A0D2Y9B3_FUSO4 Nucleolar protein 58 OS=Fusarium oxysporum f. sp. lycopersici (strain 4287 / CBS 123668 / FGSC 9935 / NRRL 34936) OX=426428 GN=FOXG_12883 PE=3 SV=1	27	16	0.3093	56717.2	9.04
$12-1	tr|A0A0J9UMY7|A0A0J9UMY7_FUSO4 ERF-3 OS=Fusarium oxysporum f. sp. lycopersici (strain 4287 / CBS 123668 / FGSC 9935 / NRRL 34936) OX=426428 GN=FOXG_03419 PE=4 SV=1	24	16	0.2656	76714.9	8.4
$12-2	tr|A0A0D2XHM1|A0A0D2XHM1_FUSO4 ERF-3 OS=Fusarium oxysporum f. sp. lycopersici (strain 4287 / CBS 123668 / FGSC 9935 / NRRL 34936) OX=426428 GN=FOXG_03419 PE=4 SV=1	24	16	0.2652	76786	8.4
$13-1	tr|A0A0D2XQZ0|A0A0D2XQZ0_FUSO4 3-oxoacyl-[acyl-carrier-protein] reductase OS=Fusarium oxysporum f. sp. lycopersici (strain 4287 / CBS 123668 / FGSC 9935 / NRRL 34936) OX=426428 GN=FOXG_06391 PE=3 SV=1	20	16	0.0894	203872	5.78
$14-1	tr|A0A0D2Y4U7|A0A0D2Y4U7_FUSO4 Uncharacterized protein OS=Fusarium oxysporum f. sp. lycopersici (strain 4287 / CBS 123668 / FGSC 9935 / NRRL 34936) OX=426428 GN=FOXG_11301 PE=4 SV=1	16	16	0.2124	84077.8	4.92
$15-1	tr|A0A0D2XDN9|A0A0D2XDN9_FUSO4 ATP-dependent RNA helicase DED1 OS=Fusarium oxysporum f. sp. lycopersici (strain 4287 / CBS 123668 / FGSC 9935 / NRRL 34936) OX=426428 GN=FOXG_02019 PE=3 SV=1	22	15	0.2597	71341.5	8.44
$16-1	tr|A0A0J9VLP8|A0A0J9VLP8_FUSO4 ATP-dependent RNA helicase DBP2 OS=Fusarium oxysporum f. sp. lycopersici (strain 4287 / CBS 123668 / FGSC 9935 / NRRL 34936) OX=426428 GN=FOXG_11505 PE=3 SV=1	21	15	0.29	58476.7	9.4
$16-2	tr|A0A0D2Y5F0|A0A0D2Y5F0_FUSO4 ATP-dependent RNA helicase DBP2 OS=Fusarium oxysporum f. sp. lycopersici (strain 4287 / CBS 123668 / FGSC 9935 / NRRL 34936) OX=426428 GN=FOXG_11505 PE=3 SV=1	21	15	0.2735	61005.9	9.38
$17-1	tr|A0A0D2X8J5|A0A0D2X8J5_FUSO4 CP-type G domain-containing protein OS=Fusarium oxysporum f. sp. lycopersici (strain 4287 / CBS 123668 / FGSC 9935 / NRRL 34936) OX=426428 GN=FOXG_00204 PE=4 SV=1	19	15	0.3272	59002.4	8.53
$18-1	tr|A0A0D2XGN9|A0A0D2XGN9_FUSO4 40S ribosomal protein S4 OS=Fusarium oxysporum f. sp. lycopersici (strain 4287 / CBS 123668 / FGSC 9935 / NRRL 34936) OX=426428 GN=FOXG_03083 PE=3 SV=1	30	14	0.4866	29550	10.15
$19-1	tr|A0A0D2XZN4|A0A0D2XZN4_FUSO4 40S ribosomal protein S3 OS=Fusarium oxysporum f. sp. lycopersici (strain 4287 / CBS 123668 / FGSC 9935 / NRRL 34936) OX=426428 GN=FOXG_09465 PE=3 SV=1	25	14	0.5846	28555.3	9.06
$20-1	tr|A0A0J9URY7|A0A0J9URY7_FUSO4 Ubiquitin carboxyl-terminal hydrolase OS=Fusarium oxysporum f. sp. lycopersici (strain 4287 / CBS 123668 / FGSC 9935 / NRRL 34936) OX=426428 GN=FOXG_05113 PE=3 SV=1	17	14	0.2062	101016	8.74
$20-2	tr|A0A0J9WKI1|A0A0J9WKI1_FUSO4 Ubiquitin carboxyl-terminal hydrolase OS=Fusarium oxysporum f. sp. lycopersici (strain 4287 / CBS 123668 / FGSC 9935 / NRRL 34936) OX=426428 GN=FOXG_05113 PE=3 SV=1	17	14	0.2108	98925.3	8.97
$20-3	tr|A0A0D2XMD6|A0A0D2XMD6_FUSO4 Ubiquitin carboxyl-terminal hydrolase OS=Fusarium oxysporum f. sp. lycopersici (strain 4287 / CBS 123668 / FGSC 9935 / NRRL 34936) OX=426428 PE=3 SV=1	17	14	0.2108	99003.3	8.74
$20-4	tr|A0A0J9UUH1|A0A0J9UUH1_FUSO4 Ubiquitin carboxyl-terminal hydrolase OS=Fusarium oxysporum f. sp. lycopersici (strain 4287 / CBS 123668 / FGSC 9935 / NRRL 34936) OX=426428 GN=FOXG_05113 PE=3 SV=1	17	14	0.2105	99294.6	8.82
$21-1	tr|A0A0D2Y2N3|A0A0D2Y2N3_FUSO4 Ribosomal protein L28e OS=Fusarium oxysporum f. sp. lycopersici (strain 4287 / CBS 123668 / FGSC 9935 / NRRL 34936) OX=426428 GN=FOXG_10532 PE=3 SV=1	50	13	0.7862	17103.1	10.17
$22-1	tr|A0A0C4DHQ7|A0A0C4DHQ7_FUSO4 Elongation factor 1-alpha OS=Fusarium oxysporum f. sp. lycopersici (strain 4287 / CBS 123668 / FGSC 9935 / NRRL 34936) OX=426428 GN=FOXG_03515 PE=3 SV=1	43	13	0.2828	47921.8	9.25
$22-2	tr|A0A2C8D0A4|A0A2C8D0A4_FUSOX Elongation factor 1-alpha OS=Fusarium oxysporum f. sp. lycopersici OX=59765 GN=tef1a PE=3 SV=1	43	13	0.2717	49853.9	9.23
$23-1	tr|A0A0D2XE97|A0A0D2XE97_FUSO4 Uncharacterized protein OS=Fusarium oxysporum f. sp. lycopersici (strain 4287 / CBS 123668 / FGSC 9935 / NRRL 34936) OX=426428 GN=FOXG_02229 PE=4 SV=1	28	13	0.3263	55106.9	5.07
$23-2	tr|A0A0J9UHH6|A0A0J9UHH6_FUSO4 Uncharacterized protein OS=Fusarium oxysporum f. sp. lycopersici (strain 4287 / CBS 123668 / FGSC 9935 / NRRL 34936) OX=426428 GN=FOXG_02229 PE=4 SV=1	28	13	0.3379	53028.7	5.14
$24-1	tr|A0A0C4DHR1|A0A0C4DHR1_FUSO4 Phosphate permease OS=Fusarium oxysporum f. sp. lycopersici (strain 4287 / CBS 123668 / FGSC 9935 / NRRL 34936) OX=426428 GN=FOXG_03789 PE=3 SV=1	25	13	0.2046	61283.8	6.19
$25-1	tr|A0A0D2XQC1|A0A0D2XQC1_FUSO4 Endoplasmic reticulum chaperone BiP OS=Fusarium oxysporum f. sp. lycopersici (strain 4287 / CBS 123668 / FGSC 9935 / NRRL 34936) OX=426428 GN=FOXG_06163 PE=3 SV=1	23	13	0.2097	72576	4.95
$26-1	tr|A0A0D2XCJ2|A0A0D2XCJ2_FUSO4 50S ribosomal protein L4e OS=Fusarium oxysporum f. sp. lycopersici (strain 4287 / CBS 123668 / FGSC 9935 / NRRL 34936) OX=426428 GN=FOXG_01615 PE=3 SV=1	22	13	0.4233	37690.8	10.78
$27-1	tr|A0A0D2XK76|A0A0D2XK76_FUSO4 Molecular chaperone HtpG OS=Fusarium oxysporum f. sp. lycopersici (strain 4287 / CBS 123668 / FGSC 9935 / NRRL 34936) OX=426428 GN=FOXG_04346 PE=3 SV=1	17	13	0.1743	79272.4	4.85
$28-1	tr|A0A0D2XBZ0|A0A0D2XBZ0_FUSO4 40S ribosomal protein S1 OS=Fusarium oxysporum f. sp. lycopersici (strain 4287 / CBS 123668 / FGSC 9935 / NRRL 34936) OX=426428 GN=RPS1 PE=3 SV=1	39	12	0.3594	29134.4	10.07
$29-1	tr|A0A0D2Y5A1|A0A0D2Y5A1_FUSO4 Uncharacterized protein OS=Fusarium oxysporum f. sp. lycopersici (strain 4287 / CBS 123668 / FGSC 9935 / NRRL 34936) OX=426428 GN=FOXG_11456 PE=4 SV=1	35	12	0.5127	32610.9	5.88
$30-1	tr|A0A0D2YC97|A0A0D2YC97_FUSO4 ATP synthase subunit beta OS=Fusarium oxysporum f. sp. lycopersici (strain 4287 / CBS 123668 / FGSC 9935 / NRRL 34936) OX=426428 GN=FOXG_13928 PE=3 SV=1	18	12	0.3171	55146.2	5.27
$31-1	tr|A0A0D2XX39|A0A0D2XX39_FUSO4 Hsp70-like protein OS=Fusarium oxysporum f. sp. lycopersici (strain 4287 / CBS 123668 / FGSC 9935 / NRRL 34936) OX=426428 GN=FOXG_08555 PE=3 SV=1	16	12	0.1979	73223.8	5.68
$32-1	tr|A0A0D2Y949|A0A0D2Y949_FUSO4 Succinate--CoA ligase [ADP-forming] subunit beta, mitochondrial OS=Fusarium oxysporum f. sp. lycopersici (strain 4287 / CBS 123668 / FGSC 9935 / NRRL 34936) OX=426428 GN=FOXG_12819 PE=3 SV=1	16	12	0.3311	48587	5.34
$32-2	tr|A0A0J9VRH6|A0A0J9VRH6_FUSO4 Succinate-CoA ligase subunit beta OS=Fusarium oxysporum f. sp. lycopersici (strain 4287 / CBS 123668 / FGSC 9935 / NRRL 34936) OX=426428 GN=FOXG_12819 PE=3 SV=1	16	12	0.4088	39509.8	5.04
$32-3	tr|A0A0J9VR08|A0A0J9VR08_FUSO4 Succinate-CoA ligase subunit beta OS=Fusarium oxysporum f. sp. lycopersici (strain 4287 / CBS 123668 / FGSC 9935 / NRRL 34936) OX=426428 GN=FOXG_12819 PE=3 SV=1	16	12	0.4011	40234.5	4.84
$32-4	tr|A0A0J9VRH1|A0A0J9VRH1_FUSO4 Succinate--CoA ligase [ADP-forming] subunit beta, mitochondrial OS=Fusarium oxysporum f. sp. lycopersici (strain 4287 / CBS 123668 / FGSC 9935 / NRRL 34936) OX=426428 GN=FOXG_12819 PE=3 SV=1	16	12	0.3364	47862.3	5.75
$33-1	tr|A0A0D2X829|A0A0D2X829_FUSO4 2-phosphoglycerate dehydratase OS=Fusarium oxysporum f. sp. lycopersici (strain 4287 / CBS 123668 / FGSC 9935 / NRRL 34936) OX=426428 GN=FOXG_00035 PE=3 SV=1	15	12	0.3539	47327	5.06
$34-1	tr|A0A0D2XAN5|A0A0D2XAN5_FUSO4 40S ribosomal protein S6 OS=Fusarium oxysporum f. sp. lycopersici (strain 4287 / CBS 123668 / FGSC 9935 / NRRL 34936) OX=426428 GN=FOXG_00951 PE=3 SV=1	25	11	0.4017	27255.4	10.58
$35-1	tr|A0A0J9UMZ4|A0A0J9UMZ4_FUSO4 Histone-glutamine methyltransferase OS=Fusarium oxysporum f. sp. lycopersici (strain 4287 / CBS 123668 / FGSC 9935 / NRRL 34936) OX=426428 GN=FOXG_18778 PE=3 SV=1	20	11	0.4462	34190.4	9.98
$36-1	tr|A0A0D2Y8V4|A0A0D2Y8V4_FUSO4 ATP-dependent RNA helicase DHH1 OS=Fusarium oxysporum f. sp. lycopersici (strain 4287 / CBS 123668 / FGSC 9935 / NRRL 34936) OX=426428 GN=FOXG_12722 PE=3 SV=1	19	11	0.2122	58504.9	8.85
$37-1	tr|A0A0D2X9I9|A0A0D2X9I9_FUSO4 SPX domain-containing protein OS=Fusarium oxysporum f. sp. lycopersici (strain 4287 / CBS 123668 / FGSC 9935 / NRRL 34936) OX=426428 GN=FOXG_00554 PE=4 SV=1	12	11	0.1241	92175.6	8.46
$37-2	tr|A0A0J9U5Y8|A0A0J9U5Y8_FUSO4 SPX domain-containing protein OS=Fusarium oxysporum f. sp. lycopersici (strain 4287 / CBS 123668 / FGSC 9935 / NRRL 34936) OX=426428 GN=FOXG_00554 PE=4 SV=1	12	11	0.129	88667.5	7.3
$38-1	tr|A0A0D2XVI1|A0A0D2XVI1_FUSO4 SAM_MT_RSMB_NOP domain-containing protein OS=Fusarium oxysporum f. sp. lycopersici (strain 4287 / CBS 123668 / FGSC 9935 / NRRL 34936) OX=426428 GN=FOXG_07993 PE=3 SV=1	12	11	0.1782	75133.6	5.61
$39-1	tr|A0A0D2XZ45|A0A0D2XZ45_FUSO4 Clathrin heavy chain OS=Fusarium oxysporum f. sp. lycopersici (strain 4287 / CBS 123668 / FGSC 9935 / NRRL 34936) OX=426428 PE=3 SV=1	12	11	0.0714	190275	5.19
$39-2	tr|A0A0J9WP37|A0A0J9WP37_FUSO4 Clathrin heavy chain OS=Fusarium oxysporum f. sp. lycopersici (strain 4287 / CBS 123668 / FGSC 9935 / NRRL 34936) OX=426428 GN=FOXG_09267 PE=3 SV=1	12	11	0.0713	190618	5.18
$40-1	tr|A0A0D2YK12|A0A0D2YK12_FUSO4 Uncharacterized protein OS=Fusarium oxysporum f. sp. lycopersici (strain 4287 / CBS 123668 / FGSC 9935 / NRRL 34936) OX=426428 GN=FOXG_16878 PE=4 SV=1	25	10	0.2061	48275.4	6.61
$41-1	tr|A0A0D2XUS2|A0A0D2XUS2_FUSO4 ADP/ATP translocase OS=Fusarium oxysporum f. sp. lycopersici (strain 4287 / CBS 123668 / FGSC 9935 / NRRL 34936) OX=426428 GN=FOXG_07727 PE=3 SV=1	22	10	0.2958	33734	9.89
$42-1	tr|A0A0D2XCI0|A0A0D2XCI0_FUSO4 H/ACA ribonucleoprotein complex subunit CBF5 OS=Fusarium oxysporum f. sp. lycopersici (strain 4287 / CBS 123668 / FGSC 9935 / NRRL 34936) OX=426428 GN=FOXG_01603 PE=3 SV=1	20	10	0.191	53699	9.11
$43-1	tr|A0A0D2XDE8|A0A0D2XDE8_FUSO4 40S ribosomal protein S18 OS=Fusarium oxysporum f. sp. lycopersici (strain 4287 / CBS 123668 / FGSC 9935 / NRRL 34936) OX=426428 GN=FOXG_01927 PE=3 SV=1	19	10	0.5064	17870.5	10.56
$44-1	tr|A0A0D2Y915|A0A0D2Y915_FUSO4 Uncharacterized protein OS=Fusarium oxysporum f. sp. lycopersici (strain 4287 / CBS 123668 / FGSC 9935 / NRRL 34936) OX=426428 GN=FOXG_12783 PE=4 SV=1	18	10	0.2626	57085	9.41
$45-1	tr|A0A0D2Y2S2|A0A0D2Y2S2_FUSO4 60S ribosomal protein L7 OS=Fusarium oxysporum f. sp. lycopersici (strain 4287 / CBS 123668 / FGSC 9935 / NRRL 34936) OX=426428 GN=FOXG_10571 PE=3 SV=1	16	10	0.4194	28486	9.97
$46-1	tr|A0A0D2YB88|A0A0D2YB88_FUSO4 Glucoamylase OS=Fusarium oxysporum f. sp. lycopersici (strain 4287 / CBS 123668 / FGSC 9935 / NRRL 34936) OX=426428 GN=FOXG_13566 PE=3 SV=1	15	10	0.2113	62709.4	8.88
$47-1	tr|A0A0D2XB06|A0A0D2XB06_FUSO4 Uncharacterized protein OS=Fusarium oxysporum f. sp. lycopersici (strain 4287 / CBS 123668 / FGSC 9935 / NRRL 34936) OX=426428 GN=FOXG_01073 PE=4 SV=1	14	10	0.106	94488.8	8.81
$48-1	tr|A0A0J9UFX2|A0A0J9UFX2_FUSO4 Uncharacterized protein OS=Fusarium oxysporum f. sp. lycopersici (strain 4287 / CBS 123668 / FGSC 9935 / NRRL 34936) OX=426428 GN=FOXG_01937 PE=4 SV=1	13	10	0.0848	164427	5.66
$48-2	tr|A0A0D2XDF8|A0A0D2XDF8_FUSO4 Uncharacterized protein OS=Fusarium oxysporum f. sp. lycopersici (strain 4287 / CBS 123668 / FGSC 9935 / NRRL 34936) OX=426428 PE=4 SV=1	13	10	0.0875	159186	5.58
$49-1	tr|A0A0J9VCB6|A0A0J9VCB6_FUSO4 MIF4G domain-containing protein OS=Fusarium oxysporum f. sp. lycopersici (strain 4287 / CBS 123668 / FGSC 9935 / NRRL 34936) OX=426428 GN=FOXG_09476 PE=4 SV=1	11	10	0.0781	159497	9.54
$50-1	tr|A0A0D2XQZ1|A0A0D2XQZ1_FUSO4 3-hydroxyacyl-[acyl-carrier-protein] dehydratase OS=Fusarium oxysporum f. sp. lycopersici (strain 4287 / CBS 123668 / FGSC 9935 / NRRL 34936) OX=426428 GN=FOXG_06392 PE=3 SV=1	10	10	0.0485	233380	5.57
$51-1	tr|A0A0D2XVI4|A0A0D2XVI4_FUSO4 Heat shock protein 60, mitochondrial OS=Fusarium oxysporum f. sp. lycopersici (strain 4287 / CBS 123668 / FGSC 9935 / NRRL 34936) OX=426428 GN=FOXG_07996 PE=3 SV=1	10	10	0.1976	61510.6	5.55
$52-1	tr|A0A0J9UQD6|A0A0J9UQD6_FUSO4 Uncharacterized protein OS=Fusarium oxysporum f. sp. lycopersici (strain 4287 / CBS 123668 / FGSC 9935 / NRRL 34936) OX=426428 GN=FOXG_04757 PE=4 SV=1	10	10	0.0613	162229	6.26
$53-1	tr|A0A0D2YBR1|A0A0D2YBR1_FUSO4 40S ribosomal protein S24 OS=Fusarium oxysporum f. sp. lycopersici (strain 4287 / CBS 123668 / FGSC 9935 / NRRL 34936) OX=426428 GN=FOXG_13739 PE=3 SV=1	24	9	0.4926	15527.9	10.95
$54-1	tr|A0A0D2XHU2|A0A0D2XHU2_FUSO4 60S ribosomal protein L13 OS=Fusarium oxysporum f. sp. lycopersici (strain 4287 / CBS 123668 / FGSC 9935 / NRRL 34936) OX=426428 GN=FOXG_03490 PE=3 SV=1	23	9	0.3679	23862.3	11.17
$55-1	tr|A0A0D2YAA4|A0A0D2YAA4_FUSO4 Phospholipase C OS=Fusarium oxysporum f. sp. lycopersici (strain 4287 / CBS 123668 / FGSC 9935 / NRRL 34936) OX=426428 GN=FOXG_13226 PE=4 SV=1	23	9	0.2088	55876.2	4.91
$56-1	tr|A0A0J9VK62|A0A0J9VK62_FUSO4 60S ribosomal protein L20 OS=Fusarium oxysporum f. sp. lycopersici (strain 4287 / CBS 123668 / FGSC 9935 / NRRL 34936) OX=426428 GN=FOXG_11195 PE=3 SV=1	18	9	0.4318	20680.7	10.25
$56-2	tr|A0A0D2Y4J2|A0A0D2Y4J2_FUSO4 60S ribosomal protein L20 OS=Fusarium oxysporum f. sp. lycopersici (strain 4287 / CBS 123668 / FGSC 9935 / NRRL 34936) OX=426428 GN=FOXG_11195 PE=3 SV=1	18	9	0.4368	20506.5	10.25
$57-1	tr|A0A0D2Y910|A0A0D2Y910_FUSO4 60S ribosomal protein OS=Fusarium oxysporum f. sp. lycopersici (strain 4287 / CBS 123668 / FGSC 9935 / NRRL 34936) OX=426428 GN=FOXG_12778 PE=3 SV=1	14	9	0.4926	15298.6	10.73
$58-1	tr|A0A0D2YGD4|A0A0D2YGD4_FUSO4 Chitinase OS=Fusarium oxysporum f. sp. lycopersici (strain 4287 / CBS 123668 / FGSC 9935 / NRRL 34936) OX=426428 PE=3 SV=1	13	9	0.1205	94229.9	8.61
$58-2	tr|A0A0J9W355|A0A0J9W355_FUSO4 Chitinase OS=Fusarium oxysporum f. sp. lycopersici (strain 4287 / CBS 123668 / FGSC 9935 / NRRL 34936) OX=426428 GN=FOXG_15373 PE=3 SV=1	13	9	0.12	94589.4	8.61
$59-1	tr|A0A0D2XDT4|A0A0D2XDT4_FUSO4 T-complex protein 1 subunit theta OS=Fusarium oxysporum f. sp. lycopersici (strain 4287 / CBS 123668 / FGSC 9935 / NRRL 34936) OX=426428 GN=FOXG_02064 PE=3 SV=1	12	9	0.1956	59416.1	4.96
$60-1	tr|A0A0D2XCE6|A0A0D2XCE6_FUSO4 Actin beta/gamma 1 OS=Fusarium oxysporum f. sp. lycopersici (strain 4287 / CBS 123668 / FGSC 9935 / NRRL 34936) OX=426428 GN=FOXG_01569 PE=3 SV=1	10	9	0.304	41607	5.45
$60-2	tr|A0A2C8D194|A0A2C8D194_FUSOX Probable Actin OS=Fusarium oxysporum f. sp. lycopersici OX=59765 GN=act PE=3 SV=1	10	9	0.304	41607	5.45
$61-1	tr|A0A0D2X8B3|A0A0D2X8B3_FUSO4 Calcium-transporting ATPase OS=Fusarium oxysporum f. sp. lycopersici (strain 4287 / CBS 123668 / FGSC 9935 / NRRL 34936) OX=426428 GN=FOXG_00122 PE=3 SV=1	9	9	0.1023	107702	5.22
$62-1	tr|A0A0D2XAN8|A0A0D2XAN8_FUSO4 Vacuolar proton pump subunit B OS=Fusarium oxysporum f. sp. lycopersici (strain 4287 / CBS 123668 / FGSC 9935 / NRRL 34936) OX=426428 GN=FOXG_00954 PE=3 SV=1	9	9	0.2153	56706.4	5.34
$63-1	tr|A0A0D2XUH4|A0A0D2XUH4_FUSO4 TIP120 domain-containing protein OS=Fusarium oxysporum f. sp. lycopersici (strain 4287 / CBS 123668 / FGSC 9935 / NRRL 34936) OX=426428 GN=FOXG_07627 PE=3 SV=1	9	9	0.0686	147885	5.16
$64-1	tr|A0A0J9VXA2|A0A0J9VXA2_FUSO4 DNA-directed RNA polymerase subunit OS=Fusarium oxysporum f. sp. lycopersici (strain 4287 / CBS 123668 / FGSC 9935 / NRRL 34936) OX=426428 GN=FOXG_13951 PE=3 SV=1	9	9	0.0575	182111	5.74
$64-2	tr|A0A0D2YCC0|A0A0D2YCC0_FUSO4 DNA-directed RNA polymerase subunit OS=Fusarium oxysporum f. sp. lycopersici (strain 4287 / CBS 123668 / FGSC 9935 / NRRL 34936) OX=426428 PE=3 SV=1	9	9	0.0599	175076	5.84
$65-1	tr|A0A0J9UWK8|A0A0J9UWK8_FUSO4 50S ribosomal protein L18e OS=Fusarium oxysporum f. sp. lycopersici (strain 4287 / CBS 123668 / FGSC 9935 / NRRL 34936) OX=426428 GN=FOXG_05561 PE=3 SV=1	23	8	0.3203	25970.8	11.14
$65-2	tr|A0A0D2XNM9|A0A0D2XNM9_FUSO4 Ribosomal_L18e/L15P domain-containing protein OS=Fusarium oxysporum f. sp. lycopersici (strain 4287 / CBS 123668 / FGSC 9935 / NRRL 34936) OX=426428 PE=3 SV=1	23	8	0.4022	20690.8	11.57
$66-1	tr|A0A0J9U592|A0A0J9U592_FUSO4 60S ribosomal protein L9-B OS=Fusarium oxysporum f. sp. lycopersici (strain 4287 / CBS 123668 / FGSC 9935 / NRRL 34936) OX=426428 GN=FOXG_00237 PE=3 SV=1	18	8	0.5873	21407.5	9.25
$67-1	tr|A0A0D2XDB1|A0A0D2XDB1_FUSO4 60S ribosomal protein L2 OS=Fusarium oxysporum f. sp. lycopersici (strain 4287 / CBS 123668 / FGSC 9935 / NRRL 34936) OX=426428 GN=FOXG_01889 PE=4 SV=1	15	8	0.3622	27561.4	11.05
$68-1	tr|A0A0D2XVJ4|A0A0D2XVJ4_FUSO4 Glyceraldehyde 3-phosphate dehydrogenase OS=Fusarium oxysporum f. sp. lycopersici (strain 4287 / CBS 123668 / FGSC 9935 / NRRL 34936) OX=426428 GN=FOXG_08006 PE=3 SV=1	15	8	0.4833	22246.9	6.13
$69-1	tr|A0A0D2XVU4|A0A0D2XVU4_FUSO4 Eukaryotic translation initiation factor 2A OS=Fusarium oxysporum f. sp. lycopersici (strain 4287 / CBS 123668 / FGSC 9935 / NRRL 34936) OX=426428 GN=FOXG_08106 PE=3 SV=1	14	8	0.1306	73753.9	9.59
$70-1	tr|A0A0D2X8I1|A0A0D2X8I1_FUSO4 D-fructose-6-phosphate amidotransferase OS=Fusarium oxysporum f. sp. lycopersici (strain 4287 / CBS 123668 / FGSC 9935 / NRRL 34936) OX=426428 GN=FOXG_00190 PE=4 SV=1	12	8	0.1016	77549.4	6.01
$71-1	tr|A0A0D2X9K0|A0A0D2X9K0_FUSO4 Calnexin OS=Fusarium oxysporum f. sp. lycopersici (strain 4287 / CBS 123668 / FGSC 9935 / NRRL 34936) OX=426428 GN=FOXG_00565 PE=3 SV=1	12	8	0.1444	62518.3	4.89
$72-1	tr|A0A0D2XZH0|A0A0D2XZH0_FUSO4 40S ribosomal protein S20 OS=Fusarium oxysporum f. sp. lycopersici (strain 4287 / CBS 123668 / FGSC 9935 / NRRL 34936) OX=426428 GN=FOXG_09399 PE=3 SV=1	12	8	0.431	12918.8	9.88
$73-1	tr|A0A0J9VWU5|A0A0J9VWU5_FUSO4 RNA helicase OS=Fusarium oxysporum f. sp. lycopersici (strain 4287 / CBS 123668 / FGSC 9935 / NRRL 34936) OX=426428 GN=FOXG_13886 PE=3 SV=1	12	8	0.1601	65637.9	8.47
$73-2	tr|A0A0D2YC55|A0A0D2YC55_FUSO4 RNA helicase OS=Fusarium oxysporum f. sp. lycopersici (strain 4287 / CBS 123668 / FGSC 9935 / NRRL 34936) OX=426428 PE=3 SV=1	12	8	0.1604	65321.5	8.03
$74-1	tr|A0A0J9UB66|A0A0J9UB66_FUSO4 AdoMet-dependent rRNA methyltransferase SPB1 OS=Fusarium oxysporum f. sp. lycopersici (strain 4287 / CBS 123668 / FGSC 9935 / NRRL 34936) OX=426428 GN=SPB1 PE=3 SV=1	11	8	0.091	94696.9	8.22
$75-1	tr|A0A0D2XMI5|A0A0D2XMI5_FUSO4 Ribosomal_L16 domain-containing protein OS=Fusarium oxysporum f. sp. lycopersici (strain 4287 / CBS 123668 / FGSC 9935 / NRRL 34936) OX=426428 PE=4 SV=1	10	8	0.2624	25348	10.52
$75-2	tr|A0A0J9UUN3|A0A0J9UUN3_FUSO4 60S ribosomal protein L10-A OS=Fusarium oxysporum f. sp. lycopersici (strain 4287 / CBS 123668 / FGSC 9935 / NRRL 34936) OX=426428 GN=FOXG_05162 PE=4 SV=1	10	8	0.2156	30964.6	10.2
$76-1	tr|A0A0D2Y4S9|A0A0D2Y4S9_FUSO4 SPX domain-containing protein OS=Fusarium oxysporum f. sp. lycopersici (strain 4287 / CBS 123668 / FGSC 9935 / NRRL 34936) OX=426428 GN=FOXG_11282 PE=4 SV=1	10	8	0.0936	88425	6.19
$77-1	tr|A0A0J9U9G1|A0A0J9U9G1_FUSO4 PH domain-containing protein OS=Fusarium oxysporum f. sp. lycopersici (strain 4287 / CBS 123668 / FGSC 9935 / NRRL 34936) OX=426428 GN=FOXG_00618 PE=4 SV=1	10	8	0.0668	137484	10.03
$77-2	tr|A0A0J9U6D7|A0A0J9U6D7_FUSO4 PH domain-containing protein OS=Fusarium oxysporum f. sp. lycopersici (strain 4287 / CBS 123668 / FGSC 9935 / NRRL 34936) OX=426428 GN=FOXG_00618 PE=4 SV=1	10	8	0.0664	138545	10.07
$78-1	tr|A0A0D2XQV2|A0A0D2XQV2_FUSO4 Aspartate carbamoyltransferase OS=Fusarium oxysporum f. sp. lycopersici (strain 4287 / CBS 123668 / FGSC 9935 / NRRL 34936) OX=426428 GN=FOXG_06351 PE=3 SV=1	9	8	0.0371	246597	5.88
$79-1	tr|A0A0D2XWE4|A0A0D2XWE4_FUSO4 Uncharacterized protein OS=Fusarium oxysporum f. sp. lycopersici (strain 4287 / CBS 123668 / FGSC 9935 / NRRL 34936) OX=426428 GN=FOXG_08310 PE=4 SV=1	9	8	0.1624	53480.4	9.04
$80-1	tr|A0A0J9UEH0|A0A0J9UEH0_FUSO4 5'-3' exoribonuclease 1 OS=Fusarium oxysporum f. sp. lycopersici (strain 4287 / CBS 123668 / FGSC 9935 / NRRL 34936) OX=426428 GN=FOXG_02024 PE=3 SV=1	9	8	0.0663	134870	6.62
$81-1	tr|A0A0D2XVZ5|A0A0D2XVZ5_FUSO4 DnaJ like subfamily C member 3 OS=Fusarium oxysporum f. sp. lycopersici (strain 4287 / CBS 123668 / FGSC 9935 / NRRL 34936) OX=426428 GN=FOXG_08159 PE=4 SV=1	8	8	0.1536	56991	8.79
$82-1	tr|A0A0D2Y2C4|A0A0D2Y2C4_FUSO4 ATPase OS=Fusarium oxysporum f. sp. lycopersici (strain 4287 / CBS 123668 / FGSC 9935 / NRRL 34936) OX=426428 GN=FOXG_10418 PE=3 SV=1	8	8	0.06	147256	5.98
$83-1	tr|A0A0J9UUJ6|A0A0J9UUJ6_FUSO4 Ribosomal protein L19 OS=Fusarium oxysporum f. sp. lycopersici (strain 4287 / CBS 123668 / FGSC 9935 / NRRL 34936) OX=426428 GN=FOXG_05553 PE=3 SV=1	18	7	0.3317	23598.2	11.38
$83-2	tr|A0A0D2XNM2|A0A0D2XNM2_FUSO4 Ribosomal protein L19 OS=Fusarium oxysporum f. sp. lycopersici (strain 4287 / CBS 123668 / FGSC 9935 / NRRL 34936) OX=426428 PE=3 SV=1	18	7	0.3564	21853.1	11.33
$84-1	tr|A0A0D2XN69|A0A0D2XN69_FUSO4 Ribosomal_L18_c domain-containing protein OS=Fusarium oxysporum f. sp. lycopersici (strain 4287 / CBS 123668 / FGSC 9935 / NRRL 34936) OX=426428 PE=3 SV=1	17	7	0.2315	35845	7.04
$84-2	tr|A0A0J9USN5|A0A0J9USN5_FUSO4 60S ribosomal protein L5 OS=Fusarium oxysporum f. sp. lycopersici (strain 4287 / CBS 123668 / FGSC 9935 / NRRL 34936) OX=426428 GN=FOXG_05398 PE=3 SV=1	17	7	0.2384	34880.8	7.04
$85-1	tr|A0A0D2X8U8|A0A0D2X8U8_FUSO4 60S ribosomal protein L11 OS=Fusarium oxysporum f. sp. lycopersici (strain 4287 / CBS 123668 / FGSC 9935 / NRRL 34936) OX=426428 GN=FOXG_00307 PE=3 SV=1	16	7	0.2659	19966.8	10.27
$86-1	tr|A0A0D2XDQ2|A0A0D2XDQ2_FUSO4 Uncharacterized protein OS=Fusarium oxysporum f. sp. lycopersici (strain 4287 / CBS 123668 / FGSC 9935 / NRRL 34936) OX=426428 GN=FOXG_02032 PE=3 SV=1	16	7	0.3641	21713.8	10.25
$87-1	tr|A0A0D2XH79|A0A0D2XH79_FUSO4 60S ribosomal protein L8 OS=Fusarium oxysporum f. sp. lycopersici (strain 4287 / CBS 123668 / FGSC 9935 / NRRL 34936) OX=426428 GN=FOXG_03277 PE=3 SV=1	16	7	0.249	29245.4	10.27
$88-1	tr|A0A0D2XI68|A0A0D2XI68_FUSO4 50S ribosomal protein L21e OS=Fusarium oxysporum f. sp. lycopersici (strain 4287 / CBS 123668 / FGSC 9935 / NRRL 34936) OX=426428 GN=FOXG_03619 PE=3 SV=1	15	7	0.4563	18126.7	10.33
$89-1	tr|A0A0J9W1T8|A0A0J9W1T8_FUSO4 Uncharacterized protein OS=Fusarium oxysporum f. sp. lycopersici (strain 4287 / CBS 123668 / FGSC 9935 / NRRL 34936) OX=426428 GN=FOXG_15230 PE=4 SV=1	12	7	0.047	161559	6.48
$89-2	tr|A0A0D2YFZ2|A0A0D2YFZ2_FUSO4 Uncharacterized protein OS=Fusarium oxysporum f. sp. lycopersici (strain 4287 / CBS 123668 / FGSC 9935 / NRRL 34936) OX=426428 PE=4 SV=1	12	7	0.0474	160258	6.52
$90-1	tr|A0A0D2XHH7|A0A0D2XHH7_FUSO4 50S ribosomal protein L14e OS=Fusarium oxysporum f. sp. lycopersici (strain 4287 / CBS 123668 / FGSC 9935 / NRRL 34936) OX=426428 GN=FOXG_03375 PE=3 SV=1	11	7	0.4626	16653.1	10.45
$91-1	tr|A0A0D2Y4M4|A0A0D2Y4M4_FUSO4 40S ribosomal protein S2 OS=Fusarium oxysporum f. sp. lycopersici (strain 4287 / CBS 123668 / FGSC 9935 / NRRL 34936) OX=426428 GN=FOXG_11227 PE=3 SV=1	11	7	0.2646	28004	10.24
$92-1	tr|A0A0J9VQY9|A0A0J9VQY9_FUSO4 Expansin-like EG45 domain-containing protein OS=Fusarium oxysporum f. sp. lycopersici (strain 4287 / CBS 123668 / FGSC 9935 / NRRL 34936) OX=426428 GN=FOXG_12855 PE=4 SV=1	11	7	0.2884	33183.3	9.59
$93-1	tr|A0A0D2XHH5|A0A0D2XHH5_FUSO4 ATP synthase subunit d, mitochondrial OS=Fusarium oxysporum f. sp. lycopersici (strain 4287 / CBS 123668 / FGSC 9935 / NRRL 34936) OX=426428 GN=FOXG_03373 PE=3 SV=1	10	7	0.3815	19422.9	6.44
$94-1	tr|A0A0D2XAB0|A0A0D2XAB0_FUSO4 Mitochondrial-processing peptidase subunit beta OS=Fusarium oxysporum f. sp. lycopersici (strain 4287 / CBS 123668 / FGSC 9935 / NRRL 34936) OX=426428 GN=FOXG_00825 PE=3 SV=1	9	7	0.1329	52489.4	5.95
$94-2	tr|A0A0J9WGI7|A0A0J9WGI7_FUSO4 Mitochondrial-processing peptidase subunit beta OS=Fusarium oxysporum f. sp. lycopersici (strain 4287 / CBS 123668 / FGSC 9935 / NRRL 34936) OX=426428 GN=FOXG_00825 PE=4 SV=1	9	7	0.1717	41036.7	5.45
$95-1	tr|A0A0D2XDL8|A0A0D2XDL8_FUSO4 60S acidic ribosomal protein P0 OS=Fusarium oxysporum f. sp. lycopersici (strain 4287 / CBS 123668 / FGSC 9935 / NRRL 34936) OX=426428 GN=FOXG_01998 PE=3 SV=1	9	7	0.3291	33512.7	4.83
$96-1	tr|A0A0D2XDP7|A0A0D2XDP7_FUSO4 Uncharacterized protein OS=Fusarium oxysporum f. sp. lycopersici (strain 4287 / CBS 123668 / FGSC 9935 / NRRL 34936) OX=426428 GN=FOXG_02027 PE=4 SV=1	9	7	0.1122	67299.1	6.54
$97-1	tr|A0A0D2XI69|A0A0D2XI69_FUSO4 40S ribosomal protein S9 OS=Fusarium oxysporum f. sp. lycopersici (strain 4287 / CBS 123668 / FGSC 9935 / NRRL 34936) OX=426428 GN=FOXG_03620 PE=3 SV=1	9	7	0.2827	21845.1	10.62
$98-1	tr|A0A0D2XMC1|A0A0D2XMC1_FUSO4 Prohibitin OS=Fusarium oxysporum f. sp. lycopersici (strain 4287 / CBS 123668 / FGSC 9935 / NRRL 34936) OX=426428 GN=FOXG_05098 PE=3 SV=1	9	7	0.3	30726.7	9.24
$99-1	tr|A0A0D2Y596|A0A0D2Y596_FUSO4 Elongation factor 3 OS=Fusarium oxysporum f. sp. lycopersici (strain 4287 / CBS 123668 / FGSC 9935 / NRRL 34936) OX=426428 GN=FOXG_11451 PE=3 SV=1	9	7	0.0654	117124	5.73
$99-2	tr|A0A2C8CXF1|A0A2C8CXF1_FUSOX Translation elongation factor 3 OS=Fusarium oxysporum f. sp. lycopersici OX=59765 GN=tef3 PE=3 SV=1	9	7	0.0654	117124	5.73
$100-1	tr|A0A0D2YKV2|A0A0D2YKV2_FUSO4 Sas10 domain-containing protein OS=Fusarium oxysporum f. sp. lycopersici (strain 4287 / CBS 123668 / FGSC 9935 / NRRL 34936) OX=426428 PE=3 SV=1	9	7	0.1463	51400	6.22
$100-2	tr|A0A0J9VBH3|A0A0J9VBH3_FUSO4 Sas10 domain-containing protein OS=Fusarium oxysporum f. sp. lycopersici (strain 4287 / CBS 123668 / FGSC 9935 / NRRL 34936) OX=426428 GN=FOXG_20030 PE=3 SV=1	9	7	0.1145	65801.2	5.22
$101-1	tr|A0A0C4DHU4|A0A0C4DHU4_FUSO4 Pyruvate decarboxylase OS=Fusarium oxysporum f. sp. lycopersici (strain 4287 / CBS 123668 / FGSC 9935 / NRRL 34936) OX=426428 GN=FOXG_08146 PE=3 SV=1	8	7	0.1456	62986	5.72
$101-2	tr|A0A0J9V5F4|A0A0J9V5F4_FUSO4 Pyruvate decarboxylase OS=Fusarium oxysporum f. sp. lycopersici (strain 4287 / CBS 123668 / FGSC 9935 / NRRL 34936) OX=426428 GN=FOXG_08146 PE=3 SV=1	8	7	0.1572	58232.7	5.91
$101-3	tr|Q0WYJ3|Q0WYJ3_FUSOX Pyruvate decarboxylase OS=Fusarium oxysporum f. sp. lycopersici OX=59765 GN=pdc1 PE=3 SV=1	8	7	0.1456	62961.9	5.72
$102-1	tr|A0A0C4DHW5|A0A0C4DHW5_FUSO4 Alcohol dehydrogenase OS=Fusarium oxysporum f. sp. lycopersici (strain 4287 / CBS 123668 / FGSC 9935 / NRRL 34936) OX=426428 GN=FOXG_12790 PE=3 SV=1	8	7	0.2096	37529.8	6.99
$102-2	tr|E3UTQ9|E3UTQ9_FUSOX Alcohol dehydrogenase OS=Fusarium oxysporum f. sp. lycopersici OX=59765 GN=ADH1 PE=3 SV=1	8	7	0.2096	37529.8	6.99
$103-1	tr|A0A0D2X8R1|A0A0D2X8R1_FUSO4 Prohibitin OS=Fusarium oxysporum f. sp. lycopersici (strain 4287 / CBS 123668 / FGSC 9935 / NRRL 34936) OX=426428 GN=FOXG_00270 PE=3 SV=1	8	7	0.219	33786.2	9.59
$104-1	tr|A0A0D2XGW2|A0A0D2XGW2_FUSO4 Uncharacterized protein OS=Fusarium oxysporum f. sp. lycopersici (strain 4287 / CBS 123668 / FGSC 9935 / NRRL 34936) OX=426428 GN=FOXG_03156 PE=3 SV=1	8	7	0.1297	60452.8	4.95
$105-1	tr|A0A0D2XJN8|A0A0D2XJN8_FUSO4 Aspartate--tRNA ligase OS=Fusarium oxysporum f. sp. lycopersici (strain 4287 / CBS 123668 / FGSC 9935 / NRRL 34936) OX=426428 GN=FOXG_04148 PE=3 SV=1	8	7	0.0735	107224	7.14
$106-1	tr|A0A0D2XVA7|A0A0D2XVA7_FUSO4 Uncharacterized protein OS=Fusarium oxysporum f. sp. lycopersici (strain 4287 / CBS 123668 / FGSC 9935 / NRRL 34936) OX=426428 GN=FOXG_07916 PE=4 SV=1	8	7	0.3077	20322.8	7.02
$107-1	tr|A0A0D2XVR8|A0A0D2XVR8_FUSO4 Uncharacterized protein OS=Fusarium oxysporum f. sp. lycopersici (strain 4287 / CBS 123668 / FGSC 9935 / NRRL 34936) OX=426428 PE=3 SV=1	8	7	0.0855	91843.5	5.96
$108-1	tr|A0A0D2XX33|A0A0D2XX33_FUSO4 Ribosomal RNA-processing protein 8 OS=Fusarium oxysporum f. sp. lycopersici (strain 4287 / CBS 123668 / FGSC 9935 / NRRL 34936) OX=426428 GN=FOXG_08549 PE=3 SV=1	8	7	0.1643	55097.7	9.33
$109-1	tr|A0A0D2Y1X8|A0A0D2Y1X8_FUSO4 Acetyltransferase OS=Fusarium oxysporum f. sp. lycopersici (strain 4287 / CBS 123668 / FGSC 9935 / NRRL 34936) OX=426428 GN=FOXG_10271 PE=4 SV=1	8	7	0.0867	92901.6	8.3
$110-1	tr|A0A0J9WKQ5|A0A0J9WKQ5_FUSO4 Uncharacterized protein OS=Fusarium oxysporum f. sp. lycopersici (strain 4287 / CBS 123668 / FGSC 9935 / NRRL 34936) OX=426428 GN=FOXG_19035 PE=4 SV=1	8	7	0.2128	40006.7	4.59
$111-1	tr|A0A0D2X8D1|A0A0D2X8D1_FUSO4 Protein disulfide-isomerase OS=Fusarium oxysporum f. sp. lycopersici (strain 4287 / CBS 123668 / FGSC 9935 / NRRL 34936) OX=426428 GN=FOXG_00140 PE=3 SV=1	7	7	0.168	55386.7	4.74
$112-1	tr|A0A0D2XAV3|A0A0D2XAV3_FUSO4 Pescadillo homolog OS=Fusarium oxysporum f. sp. lycopersici (strain 4287 / CBS 123668 / FGSC 9935 / NRRL 34936) OX=426428 GN=NOP7 PE=3 SV=1	7	7	0.085	73986	5.32
$113-1	tr|A0A0D2XDN1|A0A0D2XDN1_FUSO4 3-hydroxybutyryl-CoA dehydrogenase OS=Fusarium oxysporum f. sp. lycopersici (strain 4287 / CBS 123668 / FGSC 9935 / NRRL 34936) OX=426428 GN=FOXG_02011 PE=3 SV=1	7	7	0.2226	34168.1	8.48
$114-1	tr|A0A0D2XE49|A0A0D2XE49_FUSO4 Eukaryotic translation initiation factor 3 subunit A OS=Fusarium oxysporum f. sp. lycopersici (strain 4287 / CBS 123668 / FGSC 9935 / NRRL 34936) OX=426428 GN=TIF32 PE=3 SV=1	7	7	0.0597	120247	9.43
$115-1	tr|A0A0D2XI04|A0A0D2XI04_FUSO4 Coatomer subunit gamma OS=Fusarium oxysporum f. sp. lycopersici (strain 4287 / CBS 123668 / FGSC 9935 / NRRL 34936) OX=426428 GN=FOXG_03553 PE=3 SV=1	7	7	0.0906	100806	5.28
$116-1	tr|A0A0D2XQU8|A0A0D2XQU8_FUSO4 Peroxisomal hydratase-dehydrogenase-epimerase OS=Fusarium oxysporum f. sp. lycopersici (strain 4287 / CBS 123668 / FGSC 9935 / NRRL 34936) OX=426428 GN=FOXG_06347 PE=3 SV=1	7	7	0.0834	96931.4	8.65
$117-1	tr|A0A0J9VB74|A0A0J9VB74_FUSO4 Cyclopropane-fatty-acyl-phospholipid synthase OS=Fusarium oxysporum f. sp. lycopersici (strain 4287 / CBS 123668 / FGSC 9935 / NRRL 34936) OX=426428 GN=FOXG_09295 PE=4 SV=1	7	7	0.1689	43921.1	5.29
$117-2	tr|A0A0D2XZ71|A0A0D2XZ71_FUSO4 Uncharacterized protein OS=Fusarium oxysporum f. sp. lycopersici (strain 4287 / CBS 123668 / FGSC 9935 / NRRL 34936) OX=426428 PE=4 SV=1	7	7	0.1288	57339.4	6.04
$118-1	tr|A0A0J9VCB5|A0A0J9VCB5_FUSO4 Carrier domain-containing protein OS=Fusarium oxysporum f. sp. lycopersici (strain 4287 / CBS 123668 / FGSC 9935 / NRRL 34936) OX=426428 GN=FOXG_09770 PE=4 SV=1	7	7	0.072	134916	5.14
$119-1	tr|A0A0J9WN87|A0A0J9WN87_FUSO4 Reticulon-like protein OS=Fusarium oxysporum f. sp. lycopersici (strain 4287 / CBS 123668 / FGSC 9935 / NRRL 34936) OX=426428 GN=FOXG_08264 PE=4 SV=1	7	7	0.2832	37538.2	5.3
$120-1	tr|A0A0D2XMZ6|A0A0D2XMZ6_FUSO4 50S ribosomal protein L22e OS=Fusarium oxysporum f. sp. lycopersici (strain 4287 / CBS 123668 / FGSC 9935 / NRRL 34936) OX=426428 GN=FOXG_05325 PE=3 SV=1	21	6	0.4516	14199.9	9.22
$121-1	tr|A0A0D2Y5E6|A0A0D2Y5E6_FUSO4 40S ribosomal protein S16 OS=Fusarium oxysporum f. sp. lycopersici (strain 4287 / CBS 123668 / FGSC 9935 / NRRL 34936) OX=426428 GN=FOXG_11501 PE=4 SV=1	20	6	0.406	15117.6	10.27
$122-1	tr|A0A0D2XMC3|A0A0D2XMC3_FUSO4 H/ACA ribonucleoprotein complex subunit 2 OS=Fusarium oxysporum f. sp. lycopersici (strain 4287 / CBS 123668 / FGSC 9935 / NRRL 34936) OX=426428 GN=FOXG_05100 PE=3 SV=1	19	6	0.2697	26327.9	9.2
$123-1	tr|A0A0D2XJZ4|A0A0D2XJZ4_FUSO4 60S ribosomal protein L17 OS=Fusarium oxysporum f. sp. lycopersici (strain 4287 / CBS 123668 / FGSC 9935 / NRRL 34936) OX=426428 GN=FOXG_04262 PE=3 SV=1	17	6	0.2703	20691.5	10.61
$124-1	tr|A0A0D2Y8Y6|A0A0D2Y8Y6_FUSO4 Uncharacterized protein OS=Fusarium oxysporum f. sp. lycopersici (strain 4287 / CBS 123668 / FGSC 9935 / NRRL 34936) OX=426428 GN=FOXG_12754 PE=4 SV=1	17	6	0.1405	45160.7	5.27
$125-1	tr|A0A0C4DHX5|A0A0C4DHX5_FUSO4 GTP-binding protein rhoA OS=Fusarium oxysporum f. sp. lycopersici (strain 4287 / CBS 123668 / FGSC 9935 / NRRL 34936) OX=426428 GN=FOXG_13835 PE=4 SV=1	15	6	0.2462	22016.1	6.23
$126-1	tr|A0A0D2XAN2|A0A0D2XAN2_FUSO4 40S ribosomal protein S8 OS=Fusarium oxysporum f. sp. lycopersici (strain 4287 / CBS 123668 / FGSC 9935 / NRRL 34936) OX=426428 GN=FOXG_00948 PE=3 SV=1	15	6	0.2233	23199.9	10.74
$127-1	tr|A0A0D2XVK7|A0A0D2XVK7_FUSO4 30S ribosomal protein S10e OS=Fusarium oxysporum f. sp. lycopersici (strain 4287 / CBS 123668 / FGSC 9935 / NRRL 34936) OX=426428 GN=FOXG_08019 PE=4 SV=1	14	6	0.297	18722.9	9.89
$128-1	tr|A0A0D2Y2M4|A0A0D2Y2M4_FUSO4 50S ribosomal protein L23Ae OS=Fusarium oxysporum f. sp. lycopersici (strain 4287 / CBS 123668 / FGSC 9935 / NRRL 34936) OX=426428 GN=FOXG_10522 PE=3 SV=1	12	6	0.3464	17088.9	10.25
$128-2	tr|A0A0J9VGR3|A0A0J9VGR3_FUSO4 50S ribosomal protein L23Ae OS=Fusarium oxysporum f. sp. lycopersici (strain 4287 / CBS 123668 / FGSC 9935 / NRRL 34936) OX=426428 GN=FOXG_10522 PE=3 SV=1	12	6	0.3442	17235.1	10.2
$129-1	tr|A0A0D2Y2S1|A0A0D2Y2S1_FUSO4 40S ribosomal protein S14 OS=Fusarium oxysporum f. sp. lycopersici (strain 4287 / CBS 123668 / FGSC 9935 / NRRL 34936) OX=426428 GN=FOXG_10570 PE=3 SV=1	12	6	0.4967	16058.2	10.88
$130-1	tr|A0A0D2YC11|A0A0D2YC11_FUSO4 RRM domain-containing protein OS=Fusarium oxysporum f. sp. lycopersici (strain 4287 / CBS 123668 / FGSC 9935 / NRRL 34936) OX=426428 GN=FOXG_13842 PE=4 SV=1	12	6	0.1762	40813.9	8.99
$131-1	tr|A0A0J9VII7|A0A0J9VII7_FUSO4 Uncharacterized protein OS=Fusarium oxysporum f. sp. lycopersici (strain 4287 / CBS 123668 / FGSC 9935 / NRRL 34936) OX=426428 GN=FOXG_11113 PE=3 SV=1	12	6	0.1869	33602.5	9.4
$131-2	tr|A0A0D2Y4B1|A0A0D2Y4B1_FUSO4 Uncharacterized protein OS=Fusarium oxysporum f. sp. lycopersici (strain 4287 / CBS 123668 / FGSC 9935 / NRRL 34936) OX=426428 PE=3 SV=1	12	6	0.1863	33937.8	9.45
$132-1	tr|A0A0D2XCY5|A0A0D2XCY5_FUSO4 40S ribosomal protein S13 OS=Fusarium oxysporum f. sp. lycopersici (strain 4287 / CBS 123668 / FGSC 9935 / NRRL 34936) OX=426428 GN=FOXG_01760 PE=3 SV=1	10	6	0.3841	16778.5	10.54
$133-1	tr|A0A0D2XGT0|A0A0D2XGT0_FUSO4 60S ribosomal protein L24 OS=Fusarium oxysporum f. sp. lycopersici (strain 4287 / CBS 123668 / FGSC 9935 / NRRL 34936) OX=426428 GN=FOXG_03124 PE=3 SV=1	10	6	0.2813	18011.6	11.3
$134-1	tr|A0A0D2XVM8|A0A0D2XVM8_FUSO4 60S ribosomal protein L3 OS=Fusarium oxysporum f. sp. lycopersici (strain 4287 / CBS 123668 / FGSC 9935 / NRRL 34936) OX=426428 GN=FOXG_08040 PE=3 SV=1	9	6	0.1535	44107.6	10.17
$135-1	tr|A0A0D2XZK4|A0A0D2XZK4_FUSO4 Brix domain-containing protein OS=Fusarium oxysporum f. sp. lycopersici (strain 4287 / CBS 123668 / FGSC 9935 / NRRL 34936) OX=426428 GN=FOXG_09435 PE=4 SV=1	9	6	0.1518	47799.7	9.4
$136-1	tr|A0A0D2Y2F8|A0A0D2Y2F8_FUSO4 40S ribosomal protein S19 OS=Fusarium oxysporum f. sp. lycopersici (strain 4287 / CBS 123668 / FGSC 9935 / NRRL 34936) OX=426428 GN=FOXG_10455 PE=3 SV=1	9	6	0.3533	16611.5	9.18
$137-1	tr|A0A0D2XA53|A0A0D2XA53_FUSO4 ATP synthase subunit 5, mitochondrial OS=Fusarium oxysporum f. sp. lycopersici (strain 4287 / CBS 123668 / FGSC 9935 / NRRL 34936) OX=426428 GN=FOXG_00768 PE=3 SV=1	8	6	0.2788	23870.2	9.55
$138-1	tr|A0A0D2XBL2|A0A0D2XBL2_FUSO4 Cerevisin OS=Fusarium oxysporum f. sp. lycopersici (strain 4287 / CBS 123668 / FGSC 9935 / NRRL 34936) OX=426428 GN=FOXG_01284 PE=3 SV=1	8	6	0.1222	57075.1	5.87
$139-1	tr|A0A0D2XCA4|A0A0D2XCA4_FUSO4 Alkaline phosphatase OS=Fusarium oxysporum f. sp. lycopersici (strain 4287 / CBS 123668 / FGSC 9935 / NRRL 34936) OX=426428 GN=FOXG_01527 PE=3 SV=1	8	6	0.0901	71755.9	6.39
$140-1	tr|A0A0D2XEI5|A0A0D2XEI5_FUSO4 Uncharacterized protein OS=Fusarium oxysporum f. sp. lycopersici (strain 4287 / CBS 123668 / FGSC 9935 / NRRL 34936) OX=426428 GN=FOXG_02317 PE=3 SV=1	8	6	0.0765	88100.7	5.06
$141-1	tr|A0A0J9V6X2|A0A0J9V6X2_FUSO4 Uncharacterized protein OS=Fusarium oxysporum f. sp. lycopersici (strain 4287 / CBS 123668 / FGSC 9935 / NRRL 34936) OX=426428 GN=FOXG_08303 PE=4 SV=1	8	6	0.0845	81981.3	6.1
$141-2	tr|A0A0D2XWD7|A0A0D2XWD7_FUSO4 Uncharacterized protein OS=Fusarium oxysporum f. sp. lycopersici (strain 4287 / CBS 123668 / FGSC 9935 / NRRL 34936) OX=426428 GN=FOXG_08303 PE=4 SV=1	8	6	0.0827	83496	6.3
$142-1	tr|A0A0D2X9U0|A0A0D2X9U0_FUSO4 Tubulin alpha chain OS=Fusarium oxysporum f. sp. lycopersici (strain 4287 / CBS 123668 / FGSC 9935 / NRRL 34936) OX=426428 GN=FOXG_00655 PE=3 SV=1	7	6	0.106	50378.1	5
$143-1	tr|A0A0D2XCC1|A0A0D2XCC1_FUSO4 Succinate dehydrogenase [ubiquinone] flavoprotein subunit, mitochondrial OS=Fusarium oxysporum f. sp. lycopersici (strain 4287 / CBS 123668 / FGSC 9935 / NRRL 34936) OX=426428 GN=FOXG_01544 PE=3 SV=1	7	6	0.1031	71143.7	6.51
$144-1	tr|A0A0D2XDG3|A0A0D2XDG3_FUSO4 Hydrolase_4 domain-containing protein OS=Fusarium oxysporum f. sp. lycopersici (strain 4287 / CBS 123668 / FGSC 9935 / NRRL 34936) OX=426428 GN=FOXG_01942 PE=4 SV=1	7	6	0.1649	41698.7	8.89
$145-1	tr|A0A0D2XIB5|A0A0D2XIB5_FUSO4 Dolichyl-phosphate-mannose--protein mannosyltransferase OS=Fusarium oxysporum f. sp. lycopersici (strain 4287 / CBS 123668 / FGSC 9935 / NRRL 34936) OX=426428 GN=FOXG_03668 PE=3 SV=1	7	6	0.054	108221	6.66
$146-1	tr|A0A0D2Y9B4|A0A0D2Y9B4_FUSO4 Ubiquitin-40S ribosomal protein S27a OS=Fusarium oxysporum f. sp. lycopersici (strain 4287 / CBS 123668 / FGSC 9935 / NRRL 34936) OX=426428 GN=FOXG_12884 PE=3 SV=1	7	6	0.3506	17741.5	9.82
$147-1	tr|A0A0J9V8E7|A0A0J9V8E7_FUSO4 Kinesin-like protein OS=Fusarium oxysporum f. sp. lycopersici (strain 4287 / CBS 123668 / FGSC 9935 / NRRL 34936) OX=426428 GN=FOXG_08597 PE=3 SV=1	7	6	0.0616	97344.2	5.61
$147-2	tr|A0A0D2XX81|A0A0D2XX81_FUSO4 Kinesin-like protein OS=Fusarium oxysporum f. sp. lycopersici (strain 4287 / CBS 123668 / FGSC 9935 / NRRL 34936) OX=426428 GN=FOXG_08597 PE=3 SV=1	7	6	0.0579	103339	5.58
$148-1	tr|A0A0J9VCU2|A0A0J9VCU2_FUSO4 Uncharacterized protein OS=Fusarium oxysporum f. sp. lycopersici (strain 4287 / CBS 123668 / FGSC 9935 / NRRL 34936) OX=426428 GN=FOXG_09617 PE=4 SV=1	7	6	0.0713	92611.3	5.76
$148-2	tr|A0A0D2Y032|A0A0D2Y032_FUSO4 Uncharacterized protein OS=Fusarium oxysporum f. sp. lycopersici (strain 4287 / CBS 123668 / FGSC 9935 / NRRL 34936) OX=426428 PE=4 SV=1	7	6	0.0717	92171.8	5.76
$149-1	tr|A0A0D2XAU6|A0A0D2XAU6_FUSO4 SAC domain-containing protein OS=Fusarium oxysporum f. sp. lycopersici (strain 4287 / CBS 123668 / FGSC 9935 / NRRL 34936) OX=426428 GN=FOXG_01012 PE=4 SV=1	6	6	0.0606	80528.6	9.1
$149-2	tr|A0A0J9U8B6|A0A0J9U8B6_FUSO4 SAC domain-containing protein OS=Fusarium oxysporum f. sp. lycopersici (strain 4287 / CBS 123668 / FGSC 9935 / NRRL 34936) OX=426428 GN=FOXG_01012 PE=4 SV=1	6	6	0.0699	70382	8.61
$150-1	tr|A0A0D2XDB6|A0A0D2XDB6_FUSO4 Uncharacterized protein OS=Fusarium oxysporum f. sp. lycopersici (strain 4287 / CBS 123668 / FGSC 9935 / NRRL 34936) OX=426428 GN=FOXG_01894 PE=4 SV=1	6	6	0.0377	224204	6.64
$151-1	tr|A0A0D2Y562|A0A0D2Y562_FUSO4 AA1-like domain-containing protein OS=Fusarium oxysporum f. sp. lycopersici (strain 4287 / CBS 123668 / FGSC 9935 / NRRL 34936) OX=426428 GN=FOXG_11416 PE=4 SV=1	6	6	0.2989	20701.3	9.33
$152-1	tr|A0A0J9UPT5|A0A0J9UPT5_FUSO4 FAD_binding_3 domain-containing protein OS=Fusarium oxysporum f. sp. lycopersici (strain 4287 / CBS 123668 / FGSC 9935 / NRRL 34936) OX=426428 GN=FOXG_04756 PE=4 SV=1	6	6	0.1125	53087.8	5.7
$152-2	tr|A0A0D2XLD2|A0A0D2XLD2_FUSO4 FAD_binding_3 domain-containing protein OS=Fusarium oxysporum f. sp. lycopersici (strain 4287 / CBS 123668 / FGSC 9935 / NRRL 34936) OX=426428 PE=4 SV=1	6	6	0.1143	52310.9	5.7
$153-1	tr|A0A0J9V2K4|A0A0J9V2K4_FUSO4 T-complex protein 1 subunit gamma OS=Fusarium oxysporum f. sp. lycopersici (strain 4287 / CBS 123668 / FGSC 9935 / NRRL 34936) OX=426428 GN=FOXG_07692 PE=4 SV=1	6	6	0.1649	42876.8	6.79
$153-2	tr|A0A0D2XUN7|A0A0D2XUN7_FUSO4 T-complex protein 1 subunit gamma OS=Fusarium oxysporum f. sp. lycopersici (strain 4287 / CBS 123668 / FGSC 9935 / NRRL 34936) OX=426428 PE=3 SV=1	6	6	0.119	58958.3	5.84
$154-1	tr|A0A0J9V952|A0A0J9V952_FUSO4 Uncharacterized protein OS=Fusarium oxysporum f. sp. lycopersici (strain 4287 / CBS 123668 / FGSC 9935 / NRRL 34936) OX=426428 GN=FOXG_19847 PE=4 SV=1	6	6	0.0911	83424.4	5.42
$154-2	tr|A0A0D2XXB8|A0A0D2XXB8_FUSO4 BPP domain-containing protein OS=Fusarium oxysporum f. sp. lycopersici (strain 4287 / CBS 123668 / FGSC 9935 / NRRL 34936) OX=426428 PE=4 SV=1	6	6	0.2047	37188.9	7.9
$155-1	tr|A0A0D2XDT8|A0A0D2XDT8_FUSO4 Ribosomal protein L37ae OS=Fusarium oxysporum f. sp. lycopersici (strain 4287 / CBS 123668 / FGSC 9935 / NRRL 34936) OX=426428 GN=FOXG_02068 PE=3 SV=1	28	5	0.4565	10146.9	10.46
$156-1	tr|A0A0D2Y4L7|A0A0D2Y4L7_FUSO4 50S ribosomal protein L31e OS=Fusarium oxysporum f. sp. lycopersici (strain 4287 / CBS 123668 / FGSC 9935 / NRRL 34936) OX=426428 GN=FOXG_11220 PE=3 SV=1	17	5	0.2951	13907	10.34
$157-1	tr|A0A0D2XC49|A0A0D2XC49_FUSO4 Protein YOP1 OS=Fusarium oxysporum f. sp. lycopersici (strain 4287 / CBS 123668 / FGSC 9935 / NRRL 34936) OX=426428 GN=FOXG_01472 PE=3 SV=1	13	5	0.2663	19146.9	7.87
$158-1	tr|A0A0D2X911|A0A0D2X911_FUSO4 60S ribosomal protein L35 OS=Fusarium oxysporum f. sp. lycopersici (strain 4287 / CBS 123668 / FGSC 9935 / NRRL 34936) OX=426428 GN=FOXG_00371 PE=3 SV=1	12	5	0.2742	14316.8	11.4
$159-1	tr|A0A0D2X9U6|A0A0D2X9U6_FUSO4 40S ribosomal protein S15 OS=Fusarium oxysporum f. sp. lycopersici (strain 4287 / CBS 123668 / FGSC 9935 / NRRL 34936) OX=426428 GN=FOXG_00661 PE=3 SV=1	12	5	0.3355	17494.2	10.07
$160-1	tr|A0A0D2XR18|A0A0D2XR18_FUSO4 GDP-mannose pyrophosphorylase OS=Fusarium oxysporum f. sp. lycopersici (strain 4287 / CBS 123668 / FGSC 9935 / NRRL 34936) OX=426428 GN=FOXG_06420 PE=4 SV=1	9	5	0.1342	49609.1	6.14
$161-1	tr|A0A0J9UYI6|A0A0J9UYI6_FUSO4 Elongation factor 2 OS=Fusarium oxysporum f. sp. lycopersici (strain 4287 / CBS 123668 / FGSC 9935 / NRRL 34936) OX=426428 GN=FOXG_06275 PE=4 SV=1	9	5	0.098	50325.2	7.13
$162-1	tr|A0A0D2X917|A0A0D2X917_FUSO4 60S ribosomal protein L6 OS=Fusarium oxysporum f. sp. lycopersici (strain 4287 / CBS 123668 / FGSC 9935 / NRRL 34936) OX=426428 GN=FOXG_00377 PE=3 SV=1	8	5	0.265	22327.6	10.02
$163-1	tr|A0A0D2XAT5|A0A0D2XAT5_FUSO4 40S ribosomal protein S11 OS=Fusarium oxysporum f. sp. lycopersici (strain 4287 / CBS 123668 / FGSC 9935 / NRRL 34936) OX=426428 GN=FOXG_01001 PE=3 SV=1	8	5	0.3043	18449.3	10.94
$164-1	tr|A0A0D2XCG7|A0A0D2XCG7_FUSO4 C-8 sterol isomerase OS=Fusarium oxysporum f. sp. lycopersici (strain 4287 / CBS 123668 / FGSC 9935 / NRRL 34936) OX=426428 GN=FOXG_01590 PE=3 SV=1	8	5	0.1872	26091.5	6.3
$165-1	tr|A0A0D2XJR3|A0A0D2XJR3_FUSO4 Eukaryotic translation initiation factor 5B OS=Fusarium oxysporum f. sp. lycopersici (strain 4287 / CBS 123668 / FGSC 9935 / NRRL 34936) OX=426428 PE=4 SV=1	8	5	0.041	117882	5.63
$166-1	tr|A0A0D2XMQ0|A0A0D2XMQ0_FUSO4 60S ribosomal protein L44 OS=Fusarium oxysporum f. sp. lycopersici (strain 4287 / CBS 123668 / FGSC 9935 / NRRL 34936) OX=426428 GN=FOXG_05227 PE=3 SV=1	8	5	0.2736	12112.3	10.38
$167-1	tr|A0A0D2XQM8|A0A0D2XQM8_FUSO4 Elongation factor 2 OS=Fusarium oxysporum f. sp. lycopersici (strain 4287 / CBS 123668 / FGSC 9935 / NRRL 34936) OX=426428 GN=FOXG_06276 PE=4 SV=1	8	5	0.1026	37888.2	6.48
$168-1	tr|A0A0D2XVQ3|A0A0D2XVQ3_FUSO4 T-complex protein 1 subunit zeta OS=Fusarium oxysporum f. sp. lycopersici (strain 4287 / CBS 123668 / FGSC 9935 / NRRL 34936) OX=426428 GN=FOXG_08065 PE=3 SV=1	8	5	0.0879	59344.6	5.79
$169-1	tr|A0A0D2XX00|A0A0D2XX00_FUSO4 Uncharacterized protein OS=Fusarium oxysporum f. sp. lycopersici (strain 4287 / CBS 123668 / FGSC 9935 / NRRL 34936) OX=426428 GN=FOXG_08516 PE=4 SV=1	8	5	0.2464	23824.6	9.77
$170-1	tr|A0A0D2XXN9|A0A0D2XXN9_FUSO4 Isocitrate dehydrogenase [NAD] subunit, mitochondrial OS=Fusarium oxysporum f. sp. lycopersici (strain 4287 / CBS 123668 / FGSC 9935 / NRRL 34936) OX=426428 GN=FOXG_08758 PE=3 SV=1	8	5	0.1931	41010.6	8.74
$171-1	tr|A0A0D2X898|A0A0D2X898_FUSO4 60S ribosomal protein L33-A OS=Fusarium oxysporum f. sp. lycopersici (strain 4287 / CBS 123668 / FGSC 9935 / NRRL 34936) OX=426428 GN=FOXG_00107 PE=3 SV=1	7	5	0.3853	12187	11.06
$172-1	tr|A0A0D2XA47|A0A0D2XA47_FUSO4 26S proteasome regulatory subunit N6 OS=Fusarium oxysporum f. sp. lycopersici (strain 4287 / CBS 123668 / FGSC 9935 / NRRL 34936) OX=426428 GN=FOXG_00762 PE=3 SV=1	7	5	0.1158	47707	5.7
$173-1	tr|A0A0D2XGT2|A0A0D2XGT2_FUSO4 Nascent polypeptide-associated complex subunit beta OS=Fusarium oxysporum f. sp. lycopersici (strain 4287 / CBS 123668 / FGSC 9935 / NRRL 34936) OX=426428 PE=3 SV=1	7	5	0.25	17973.1	6
$173-2	tr|A0A0J9ULB2|A0A0J9ULB2_FUSO4 Nascent polypeptide-associated complex subunit beta OS=Fusarium oxysporum f. sp. lycopersici (strain 4287 / CBS 123668 / FGSC 9935 / NRRL 34936) OX=426428 GN=FOXG_03126 PE=3 SV=1	7	5	0.2645	17006	5.82
$174-1	tr|A0A0D2XJV1|A0A0D2XJV1_FUSO4 60S ribosomal protein L12 OS=Fusarium oxysporum f. sp. lycopersici (strain 4287 / CBS 123668 / FGSC 9935 / NRRL 34936) OX=426428 GN=FOXG_04217 PE=3 SV=1	7	5	0.3091	17718.3	9.28
$175-1	tr|A0A0D2XME0|A0A0D2XME0_FUSO4 Cellular nucleic acid-binding protein OS=Fusarium oxysporum f. sp. lycopersici (strain 4287 / CBS 123668 / FGSC 9935 / NRRL 34936) OX=426428 GN=FOXG_05117 PE=4 SV=1	7	5	0.3764	18945.8	8.32
$176-1	tr|A0A0D2XQR5|A0A0D2XQR5_FUSO4 Dynein heavy chain, cytoplasmic OS=Fusarium oxysporum f. sp. lycopersici (strain 4287 / CBS 123668 / FGSC 9935 / NRRL 34936) OX=426428 PE=4 SV=1	7	5	0.0075	485037	5.66
$176-2	tr|A0A0J9UXG9|A0A0J9UXG9_FUSO4 Dynein heavy chain, cytoplasmic OS=Fusarium oxysporum f. sp. lycopersici (strain 4287 / CBS 123668 / FGSC 9935 / NRRL 34936) OX=426428 GN=FOXG_06313 PE=4 SV=1	7	5	0.0074	488245	5.66
$177-1	tr|A0A0D2XZ51|A0A0D2XZ51_FUSO4 Adenosylhomocysteinase OS=Fusarium oxysporum f. sp. lycopersici (strain 4287 / CBS 123668 / FGSC 9935 / NRRL 34936) OX=426428 GN=FOXG_09273 PE=3 SV=1	7	5	0.1269	48909.8	5.58
$178-1	tr|A0A0D2Y2Y1|A0A0D2Y2Y1_FUSO4 Cellular nucleic acid-binding protein OS=Fusarium oxysporum f. sp. lycopersici (strain 4287 / CBS 123668 / FGSC 9935 / NRRL 34936) OX=426428 GN=FOXG_10630 PE=4 SV=1	7	5	0.296	23001.9	8.79
$179-1	tr|A0A0J9U6Q4|A0A0J9U6Q4_FUSO4 ATP synthase subunit 4 OS=Fusarium oxysporum f. sp. lycopersici (strain 4287 / CBS 123668 / FGSC 9935 / NRRL 34936) OX=426428 GN=FOXG_00683 PE=3 SV=1	7	5	0.2068	32189.4	9.42
$179-2	tr|A0A0D2X9W8|A0A0D2X9W8_FUSO4 ATP synthase subunit 4 OS=Fusarium oxysporum f. sp. lycopersici (strain 4287 / CBS 123668 / FGSC 9935 / NRRL 34936) OX=426428 PE=3 SV=1	7	5	0.2521	26283.9	9.2
$180-1	tr|A0A0D2X864|A0A0D2X864_FUSO4 Eukaryotic translation initiation factor 3 subunit D OS=Fusarium oxysporum f. sp. lycopersici (strain 4287 / CBS 123668 / FGSC 9935 / NRRL 34936) OX=426428 GN=FOXG_00072 PE=3 SV=1	6	5	0.0799	63616.6	5.2
$181-1	tr|A0A0D2XC53|A0A0D2XC53_FUSO4 Small acidic protein OS=Fusarium oxysporum f. sp. lycopersici (strain 4287 / CBS 123668 / FGSC 9935 / NRRL 34936) OX=426428 GN=FOXG_01476 PE=3 SV=1	6	5	0.1681	37232.2	9.61
$182-1	tr|A0A0D2XCK5|A0A0D2XCK5_FUSO4 Vacuolar protein sorting-associated protein 1 OS=Fusarium oxysporum f. sp. lycopersici (strain 4287 / CBS 123668 / FGSC 9935 / NRRL 34936) OX=426428 GN=FOXG_01628 PE=3 SV=1	6	5	0.0589	77085.5	8.52
$183-1	tr|A0A0D2XHU9|A0A0D2XHU9_FUSO4 Mitochondrial genome maintenance protein MGM101 OS=Fusarium oxysporum f. sp. lycopersici (strain 4287 / CBS 123668 / FGSC 9935 / NRRL 34936) OX=426428 GN=FOXG_03497 PE=3 SV=1	6	5	0.1589	33915.4	9.46
$184-1	tr|A0A0D2XK80|A0A0D2XK80_FUSO4 ABC transporter ATP-binding protein ARB1 OS=Fusarium oxysporum f. sp. lycopersici (strain 4287 / CBS 123668 / FGSC 9935 / NRRL 34936) OX=426428 GN=FOXG_04351 PE=4 SV=1	6	5	0.0793	68943.9	6.43
$185-1	tr|A0A0D2XPT8|A0A0D2XPT8_FUSO4 3-hydroxy-3-methylglutaryl coenzyme A synthase OS=Fusarium oxysporum f. sp. lycopersici (strain 4287 / CBS 123668 / FGSC 9935 / NRRL 34936) OX=426428 GN=FOXG_05976 PE=3 SV=1	6	5	0.1162	50134	5.89
$186-1	tr|A0A0D2XWU0|A0A0D2XWU0_FUSO4 CCT-alpha OS=Fusarium oxysporum f. sp. lycopersici (strain 4287 / CBS 123668 / FGSC 9935 / NRRL 34936) OX=426428 GN=FOXG_08456 PE=3 SV=1	6	5	0.0796	61379.7	5.78
$187-1	tr|A0A0D2XXG0|A0A0D2XXG0_FUSO4 Ribosome biogenesis protein SLX9 OS=Fusarium oxysporum f. sp. lycopersici (strain 4287 / CBS 123668 / FGSC 9935 / NRRL 34936) OX=426428 GN=FOXG_08676 PE=3 SV=1	6	5	0.328	20712.6	10.77
$188-1	tr|A0A0D2Y5K0|A0A0D2Y5K0_FUSO4 Acetolactate synthase OS=Fusarium oxysporum f. sp. lycopersici (strain 4287 / CBS 123668 / FGSC 9935 / NRRL 34936) OX=426428 GN=FOXG_11556 PE=3 SV=1	6	5	0.0906	74397.5	8.66
$189-1	tr|A0A0J9U3U5|A0A0J9U3U5_FUSO4 Dynamin GTPase OS=Fusarium oxysporum f. sp. lycopersici (strain 4287 / CBS 123668 / FGSC 9935 / NRRL 34936) OX=426428 GN=FOXG_00066 PE=3 SV=1	6	5	0.0525	92953.3	6.41
$189-2	tr|A0A0D2X858|A0A0D2X858_FUSO4 Dynamin GTPase OS=Fusarium oxysporum f. sp. lycopersici (strain 4287 / CBS 123668 / FGSC 9935 / NRRL 34936) OX=426428 GN=FOXG_00066 PE=3 SV=1	6	5	0.0539	90499.6	6.66
$190-1	tr|A0A0J9U967|A0A0J9U967_FUSO4 Ubiquinol-cytochrome c reductase core subunit 2 OS=Fusarium oxysporum f. sp. lycopersici (strain 4287 / CBS 123668 / FGSC 9935 / NRRL 34936) OX=426428 GN=FOXG_00961 PE=4 SV=1	6	5	0.0587	54213.5	9.44
$190-2	tr|A0A0D2XAP5|A0A0D2XAP5_FUSO4 Uncharacterized protein OS=Fusarium oxysporum f. sp. lycopersici (strain 4287 / CBS 123668 / FGSC 9935 / NRRL 34936) OX=426428 PE=4 SV=1	6	5	0.0661	47715.1	8.97
$191-1	tr|A0A0J9U972|A0A0J9U972_FUSO4 Mitochondrial GTP/GDP carrier protein 1 OS=Fusarium oxysporum f. sp. lycopersici (strain 4287 / CBS 123668 / FGSC 9935 / NRRL 34936) OX=426428 GN=FOXG_00963 PE=3 SV=1	6	5	0.1724	28562.7	9.97
$191-2	tr|A0A0D2XAP7|A0A0D2XAP7_FUSO4 Mitochondrial GTP/GDP carrier protein 1 OS=Fusarium oxysporum f. sp. lycopersici (strain 4287 / CBS 123668 / FGSC 9935 / NRRL 34936) OX=426428 GN=FOXG_00963 PE=3 SV=1	6	5	0.1485	32804.6	9.97
$192-1	tr|A0A0J9UNY6|A0A0J9UNY6_FUSO4 1,3-beta-glucanosyltransferase OS=Fusarium oxysporum f. sp. lycopersici (strain 4287 / CBS 123668 / FGSC 9935 / NRRL 34936) OX=426428 GN=FOXG_18811 PE=3 SV=1	6	5	0.112	56034.9	4.85
$193-1	tr|A0A0J9VGG5|A0A0J9VGG5_FUSO4 Eukaryotic translation initiation factor 3 subunit C OS=Fusarium oxysporum f. sp. lycopersici (strain 4287 / CBS 123668 / FGSC 9935 / NRRL 34936) OX=426428 GN=NIP1 PE=3 SV=1	6	5	0.0783	80599.7	6.48
$193-2	tr|A0A0D2Y2S4|A0A0D2Y2S4_FUSO4 Eukaryotic translation initiation factor 3 subunit C OS=Fusarium oxysporum f. sp. lycopersici (strain 4287 / CBS 123668 / FGSC 9935 / NRRL 34936) OX=426428 GN=NIP1 PE=3 SV=1	6	5	0.0653	96550.3	5.25
$194-1	tr|A0A0D2X8D3|A0A0D2X8D3_FUSO4 Peroxidase OS=Fusarium oxysporum f. sp. lycopersici (strain 4287 / CBS 123668 / FGSC 9935 / NRRL 34936) OX=426428 GN=FOXG_00142 PE=3 SV=1	5	5	0.1369	40075.4	8.24
$195-1	tr|A0A0D2X8Y0|A0A0D2X8Y0_FUSO4 Uncharacterized protein OS=Fusarium oxysporum f. sp. lycopersici (strain 4287 / CBS 123668 / FGSC 9935 / NRRL 34936) OX=426428 GN=FOXG_00340 PE=4 SV=1	5	5	0.0073	715029	4.75
$196-1	tr|A0A0D2X9D5|A0A0D2X9D5_FUSO4 26S protease regulatory subunit 7 OS=Fusarium oxysporum f. sp. lycopersici (strain 4287 / CBS 123668 / FGSC 9935 / NRRL 34936) OX=426428 GN=FOXG_00496 PE=3 SV=1	5	5	0.1159	49120.8	6.35
$197-1	tr|A0A0D2X9J2|A0A0D2X9J2_FUSO4 Dolichyl-diphosphooligosaccharide--protein glycosyltransferase subunit 1 OS=Fusarium oxysporum f. sp. lycopersici (strain 4287 / CBS 123668 / FGSC 9935 / NRRL 34936) OX=426428 PE=3 SV=1	5	5	0.0881	53287.9	9.35
$197-2	tr|A0A0J9U6M9|A0A0J9U6M9_FUSO4 Uncharacterized protein OS=Fusarium oxysporum f. sp. lycopersici (strain 4287 / CBS 123668 / FGSC 9935 / NRRL 34936) OX=426428 GN=FOXG_17899 PE=3 SV=1	5	5	0.0413	112063	8.91
$198-1	tr|A0A0D2X9R5|A0A0D2X9R5_FUSO4 S-adenosylmethionine synthase OS=Fusarium oxysporum f. sp. lycopersici (strain 4287 / CBS 123668 / FGSC 9935 / NRRL 34936) OX=426428 GN=FOXG_00630 PE=3 SV=1	5	5	0.1241	44311.6	5.77
$199-1	tr|A0A0D2X9X7|A0A0D2X9X7_FUSO4 DNA-directed RNA polymerases I and III subunit RPAC1 OS=Fusarium oxysporum f. sp. lycopersici (strain 4287 / CBS 123668 / FGSC 9935 / NRRL 34936) OX=426428 PE=3 SV=1	5	5	0.1155	42437.6	6.18
$200-1	tr|A0A0D2XAP0|A0A0D2XAP0_FUSO4 Tubulin alpha chain OS=Fusarium oxysporum f. sp. lycopersici (strain 4287 / CBS 123668 / FGSC 9935 / NRRL 34936) OX=426428 GN=FOXG_00956 PE=3 SV=1	5	5	0.1292	50052.9	4.94
$201-1	tr|A0A0D2XAV9|A0A0D2XAV9_FUSO4 CAMK/CAMKL/KIN4 protein kinase OS=Fusarium oxysporum f. sp. lycopersici (strain 4287 / CBS 123668 / FGSC 9935 / NRRL 34936) OX=426428 GN=FOXG_01025 PE=4 SV=1	5	5	0.0441	121470	9.64
$202-1	tr|A0A0D2XBB4|A0A0D2XBB4_FUSO4 Biotin synthase OS=Fusarium oxysporum f. sp. lycopersici (strain 4287 / CBS 123668 / FGSC 9935 / NRRL 34936) OX=426428 GN=FOXG_01182 PE=3 SV=1	5	5	0.1537	45230.5	9.23
$203-1	tr|A0A0D2XEG6|A0A0D2XEG6_FUSO4 Small COPII coat GTPase SAR1 OS=Fusarium oxysporum f. sp. lycopersici (strain 4287 / CBS 123668 / FGSC 9935 / NRRL 34936) OX=426428 GN=FOXG_02298 PE=3 SV=1	5	5	0.328	21507.6	5.96
$204-1	tr|A0A0D2XHN6|A0A0D2XHN6_FUSO4 Uncharacterized protein OS=Fusarium oxysporum f. sp. lycopersici (strain 4287 / CBS 123668 / FGSC 9935 / NRRL 34936) OX=426428 GN=FOXG_03434 PE=4 SV=1	5	5	0.1105	62374.3	5.69
$205-1	tr|A0A0D2XJU2|A0A0D2XJU2_FUSO4 Uncharacterized protein OS=Fusarium oxysporum f. sp. lycopersici (strain 4287 / CBS 123668 / FGSC 9935 / NRRL 34936) OX=426428 GN=FOXG_04208 PE=4 SV=1	5	5	0.0833	73334.5	5.01
$206-1	tr|A0A0D2XQE1|A0A0D2XQE1_FUSO4 Uncharacterized protein OS=Fusarium oxysporum f. sp. lycopersici (strain 4287 / CBS 123668 / FGSC 9935 / NRRL 34936) OX=426428 GN=FOXG_06187 PE=4 SV=1	5	5	0.0354	138409	6.56
$207-1	tr|A0A0D2XUT8|A0A0D2XUT8_FUSO4 ATP citrate synthase OS=Fusarium oxysporum f. sp. lycopersici (strain 4287 / CBS 123668 / FGSC 9935 / NRRL 34936) OX=426428 GN=FOXG_07743 PE=4 SV=1	5	5	0.1166	53263	5.41
$208-1	tr|A0A0D2XWX5|A0A0D2XWX5_FUSO4 S1 motif domain-containing protein OS=Fusarium oxysporum f. sp. lycopersici (strain 4287 / CBS 123668 / FGSC 9935 / NRRL 34936) OX=426428 PE=3 SV=1	5	5	0.1376	36931.9	5.71
$208-2	tr|A0A0J9WNH0|A0A0J9WNH0_FUSO4 Translation initiation factor 2 subunit 1 OS=Fusarium oxysporum f. sp. lycopersici (strain 4287 / CBS 123668 / FGSC 9935 / NRRL 34936) OX=426428 GN=FOXG_08491 PE=3 SV=1	5	5	0.1447	35244.9	5.32
$209-1	tr|A0A0D2XYS9|A0A0D2XYS9_FUSO4 Uncharacterized protein OS=Fusarium oxysporum f. sp. lycopersici (strain 4287 / CBS 123668 / FGSC 9935 / NRRL 34936) OX=426428 GN=FOXG_09151 PE=4 SV=1	5	5	0.183	41893.4	9.48
$210-1	tr|A0A0D2Y1W8|A0A0D2Y1W8_FUSO4 Coatomer subunit beta OS=Fusarium oxysporum f. sp. lycopersici (strain 4287 / CBS 123668 / FGSC 9935 / NRRL 34936) OX=426428 GN=FOXG_10261 PE=4 SV=1	5	5	0.0502	106648	5.35
$211-1	tr|A0A0D2Y8U3|A0A0D2Y8U3_FUSO4 CRAL-TRIO domain-containing protein OS=Fusarium oxysporum f. sp. lycopersici (strain 4287 / CBS 123668 / FGSC 9935 / NRRL 34936) OX=426428 GN=FOXG_12711 PE=4 SV=1	5	5	0.1988	37906.7	5.28
$212-1	tr|A0A0D2Y939|A0A0D2Y939_FUSO4 GTP-binding protein ypt1 OS=Fusarium oxysporum f. sp. lycopersici (strain 4287 / CBS 123668 / FGSC 9935 / NRRL 34936) OX=426428 GN=FOXG_12808 PE=4 SV=1	5	5	0.2129	22425	5.29
$213-1	tr|A0A0J9UC03|A0A0J9UC03_FUSO4 Methionyl aminopeptidase OS=Fusarium oxysporum f. sp. lycopersici (strain 4287 / CBS 123668 / FGSC 9935 / NRRL 34936) OX=426428 GN=FOXG_01861 PE=3 SV=1	5	5	0.1135	41970.2	8.15
$214-1	tr|A0A0J9UZ63|A0A0J9UZ63_FUSO4 ATP-binding cassette, subfamily F, member 3 OS=Fusarium oxysporum f. sp. lycopersici (strain 4287 / CBS 123668 / FGSC 9935 / NRRL 34936) OX=426428 GN=FOXG_06226 PE=4 SV=1	5	5	0.06	83058.1	5.95
$215-1	tr|A0A0J9VJ55|A0A0J9VJ55_FUSO4 Glycerophosphocholine phosphodiesterase OS=Fusarium oxysporum f. sp. lycopersici (strain 4287 / CBS 123668 / FGSC 9935 / NRRL 34936) OX=426428 GN=FOXG_11239 PE=4 SV=1	5	5	0.0434	130213	5.98
$215-2	tr|A0A0D2Y4N6|A0A0D2Y4N6_FUSO4 Glycerophosphocholine phosphodiesterase OS=Fusarium oxysporum f. sp. lycopersici (strain 4287 / CBS 123668 / FGSC 9935 / NRRL 34936) OX=426428 GN=FOXG_11239 PE=4 SV=1	5	5	0.0474	118749	5.92
$215-3	tr|A0A0J9VKP5|A0A0J9VKP5_FUSO4 Glycerophosphocholine phosphodiesterase OS=Fusarium oxysporum f. sp. lycopersici (strain 4287 / CBS 123668 / FGSC 9935 / NRRL 34936) OX=426428 GN=FOXG_11239 PE=4 SV=1	5	5	0.0483	116628	6.25
$216-1	tr|A0A0J9VQP6|A0A0J9VQP6_FUSO4 RRM domain-containing protein OS=Fusarium oxysporum f. sp. lycopersici (strain 4287 / CBS 123668 / FGSC 9935 / NRRL 34936) OX=426428 GN=FOXG_20775 PE=4 SV=1	5	5	0.1992	26162.1	10.08
$217-1	tr|A0A0J9WIK6|A0A0J9WIK6_FUSO4 ATP-binding cassette, subfamily G (WHITE), member 2, PDR OS=Fusarium oxysporum f. sp. lycopersici (strain 4287 / CBS 123668 / FGSC 9935 / NRRL 34936) OX=426428 GN=FOXG_02985 PE=3 SV=1	5	5	0.0436	166547	6.01
$218-1	tr|A0A0D2X998|A0A0D2X998_FUSO4 CUE domain-containing protein OS=Fusarium oxysporum f. sp. lycopersici (strain 4287 / CBS 123668 / FGSC 9935 / NRRL 34936) OX=426428 GN=FOXG_00458 PE=4 SV=1	29	4	0.0526	86502.2	6.56
$218-2	tr|A0A0J9U6C8|A0A0J9U6C8_FUSO4 CUE domain-containing protein OS=Fusarium oxysporum f. sp. lycopersici (strain 4287 / CBS 123668 / FGSC 9935 / NRRL 34936) OX=426428 GN=FOXG_00458 PE=4 SV=1	29	4	0.0543	83908.4	6.84
$219-1	tr|A0A0D2X9V7|A0A0D2X9V7_FUSO4 Structure-specific recognition protein 1 OS=Fusarium oxysporum f. sp. lycopersici (strain 4287 / CBS 123668 / FGSC 9935 / NRRL 34936) OX=426428 GN=FOXG_00672 PE=4 SV=1	20	4	0.3824	11547.7	9.42
$220-1	tr|A0A0D2Y5E5|A0A0D2Y5E5_FUSO4 60S ribosomal protein L32 OS=Fusarium oxysporum f. sp. lycopersici (strain 4287 / CBS 123668 / FGSC 9935 / NRRL 34936) OX=426428 GN=FOXG_11500 PE=3 SV=1	14	4	0.3154	14873.3	11.35
$221-1	tr|A0A0D2XUD8|A0A0D2XUD8_FUSO4 Uncharacterized protein OS=Fusarium oxysporum f. sp. lycopersici (strain 4287 / CBS 123668 / FGSC 9935 / NRRL 34936) OX=426428 GN=FOXG_07590 PE=3 SV=1	11	4	0.3671	9098.67	10.11
$222-1	tr|A0A0D2Y8W4|A0A0D2Y8W4_FUSO4 Histone H1 OS=Fusarium oxysporum f. sp. lycopersici (strain 4287 / CBS 123668 / FGSC 9935 / NRRL 34936) OX=426428 GN=FOXG_12732 PE=3 SV=1	11	4	0.192	23260.1	10.3
$223-1	tr|A0A0D2XKG8|A0A0D2XKG8_FUSO4 60S ribosomal protein L16 OS=Fusarium oxysporum f. sp. lycopersici (strain 4287 / CBS 123668 / FGSC 9935 / NRRL 34936) OX=426428 GN=FOXG_04442 PE=3 SV=1	9	4	0.1634	22719.4	10.48
$224-1	tr|A0A0D2XUS0|A0A0D2XUS0_FUSO4 40S ribosomal protein S5 OS=Fusarium oxysporum f. sp. lycopersici (strain 4287 / CBS 123668 / FGSC 9935 / NRRL 34936) OX=426428 GN=FOXG_07725 PE=3 SV=1	8	4	0.2071	18729.3	10.12
$225-1	tr|A0A0D2XFW3|A0A0D2XFW3_FUSO4 Uncharacterized protein OS=Fusarium oxysporum f. sp. lycopersici (strain 4287 / CBS 123668 / FGSC 9935 / NRRL 34936) OX=426428 GN=FOXG_02802 PE=4 SV=1	7	4	0.4706	10776.2	8.44
$226-1	tr|A0A0D2XAQ8|A0A0D2XAQ8_FUSO4 F-type H+-transporting ATPase subunit G OS=Fusarium oxysporum f. sp. lycopersici (strain 4287 / CBS 123668 / FGSC 9935 / NRRL 34936) OX=426428 GN=FOXG_00974 PE=3 SV=1	6	4	0.2132	20975.8	10.73
$227-1	tr|A0A0D2XB71|A0A0D2XB71_FUSO4 60S ribosomal protein L23 OS=Fusarium oxysporum f. sp. lycopersici (strain 4287 / CBS 123668 / FGSC 9935 / NRRL 34936) OX=426428 GN=FOXG_01139 PE=3 SV=1	6	4	0.3813	14654.2	10.33
$228-1	tr|A0A0D2XBA0|A0A0D2XBA0_FUSO4 1-phosphatidylinositol-3-phosphate 5-kinase OS=Fusarium oxysporum f. sp. lycopersici (strain 4287 / CBS 123668 / FGSC 9935 / NRRL 34936) OX=426428 GN=FOXG_01168 PE=4 SV=1	6	4	0.0132	263452	5.95
$229-1	tr|A0A0D2XBD2|A0A0D2XBD2_FUSO4 ER membrane protein complex subunit 1 OS=Fusarium oxysporum f. sp. lycopersici (strain 4287 / CBS 123668 / FGSC 9935 / NRRL 34936) OX=426428 GN=FOXG_01201 PE=3 SV=1	6	4	0.0414	104619	5.96
$230-1	tr|A0A0D2XD78|A0A0D2XD78_FUSO4 60S ribosome subunit biogenesis protein NIP7 OS=Fusarium oxysporum f. sp. lycopersici (strain 4287 / CBS 123668 / FGSC 9935 / NRRL 34936) OX=426428 GN=FOXG_01853 PE=3 SV=1	6	4	0.2181	21103.9	8.9
$231-1	tr|A0A0D2XDK3|A0A0D2XDK3_FUSO4 Protein-synthesizing GTPase OS=Fusarium oxysporum f. sp. lycopersici (strain 4287 / CBS 123668 / FGSC 9935 / NRRL 34936) OX=426428 GN=FOXG_01983 PE=4 SV=1	6	4	0.0884	54618.3	8.21
$232-1	tr|A0A0D2XGT8|A0A0D2XGT8_FUSO4 Ribosomal protein L37 OS=Fusarium oxysporum f. sp. lycopersici (strain 4287 / CBS 123668 / FGSC 9935 / NRRL 34936) OX=426428 GN=FOXG_03132 PE=3 SV=1	6	4	0.2447	10658.1	11.23
$233-1	tr|A0A0D2XLD1|A0A0D2XLD1_FUSO4 Methyltransf_2 domain-containing protein OS=Fusarium oxysporum f. sp. lycopersici (strain 4287 / CBS 123668 / FGSC 9935 / NRRL 34936) OX=426428 GN=FOXG_04755 PE=3 SV=1	6	4	0.0909	49760.1	5.45
$234-1	tr|A0A0D2XNK9|A0A0D2XNK9_FUSO4 Alpha-galactosidase OS=Fusarium oxysporum f. sp. lycopersici (strain 4287 / CBS 123668 / FGSC 9935 / NRRL 34936) OX=426428 GN=FOXG_05540 PE=4 SV=1	6	4	0.0959	37934.8	9.12
$235-1	tr|A0A0D2XVA3|A0A0D2XVA3_FUSO4 Uncharacterized protein OS=Fusarium oxysporum f. sp. lycopersici (strain 4287 / CBS 123668 / FGSC 9935 / NRRL 34936) OX=426428 GN=FOXG_07911 PE=4 SV=1	6	4	0.0584	83440.2	6.36
$236-1	tr|A0A0D2XZI8|A0A0D2XZI8_FUSO4 Uncharacterized protein OS=Fusarium oxysporum f. sp. lycopersici (strain 4287 / CBS 123668 / FGSC 9935 / NRRL 34936) OX=426428 GN=FOXG_09417 PE=4 SV=1	6	4	0.1216	29132.4	9.43
$237-1	tr|A0A0D2Y4N3|A0A0D2Y4N3_FUSO4 AAA domain-containing protein OS=Fusarium oxysporum f. sp. lycopersici (strain 4287 / CBS 123668 / FGSC 9935 / NRRL 34936) OX=426428 PE=3 SV=1	6	4	0.0569	80169.4	9.19
$237-2	tr|A0A0J9WQS0|A0A0J9WQS0_FUSO4 ATP-dependent metalloprotease OS=Fusarium oxysporum f. sp. lycopersici (strain 4287 / CBS 123668 / FGSC 9935 / NRRL 34936) OX=426428 GN=FOXG_11236 PE=3 SV=1	6	4	0.051	89721.3	9.22
$238-1	tr|A0A0D2YC80|A0A0D2YC80_FUSO4 Ras-like protein Rab-11B OS=Fusarium oxysporum f. sp. lycopersici (strain 4287 / CBS 123668 / FGSC 9935 / NRRL 34936) OX=426428 GN=FOXG_13911 PE=4 SV=1	6	4	0.184	23262.8	5.61
$238-2	tr|A0A0J9VWY5|A0A0J9VWY5_FUSO4 Ras-like protein Rab-11B OS=Fusarium oxysporum f. sp. lycopersici (strain 4287 / CBS 123668 / FGSC 9935 / NRRL 34936) OX=426428 GN=FOXG_13911 PE=4 SV=1	6	4	0.25	17578.6	7.93
$239-1	tr|A0A0D2YGN3|A0A0D2YGN3_FUSO4 Glycerophosphoryl diester phosphodiesterase OS=Fusarium oxysporum f. sp. lycopersici (strain 4287 / CBS 123668 / FGSC 9935 / NRRL 34936) OX=426428 GN=FOXG_15474 PE=4 SV=1	6	4	0.1071	46692.9	8.48
$240-1	tr|A0A0J9UDY3|A0A0J9UDY3_FUSO4 ATP synthase subunit gamma OS=Fusarium oxysporum f. sp. lycopersici (strain 4287 / CBS 123668 / FGSC 9935 / NRRL 34936) OX=426428 GN=FOXG_01951 PE=3 SV=1	6	4	0.1847	27318.4	5.14
$240-2	tr|A0A0D2XDH2|A0A0D2XDH2_FUSO4 ATP synthase subunit gamma OS=Fusarium oxysporum f. sp. lycopersici (strain 4287 / CBS 123668 / FGSC 9935 / NRRL 34936) OX=426428 GN=FOXG_01951 PE=3 SV=1	6	4	0.1528	32824.7	6.05
$241-1	tr|A0A0D2X9D6|A0A0D2X9D6_FUSO4 T-complex protein 1 subunit delta OS=Fusarium oxysporum f. sp. lycopersici (strain 4287 / CBS 123668 / FGSC 9935 / NRRL 34936) OX=426428 GN=FOXG_00497 PE=3 SV=1	5	4	0.1099	57196.7	8.76
$242-1	tr|A0A0D2XC71|A0A0D2XC71_FUSO4 rRNA biogenesis protein RRP36 OS=Fusarium oxysporum f. sp. lycopersici (strain 4287 / CBS 123668 / FGSC 9935 / NRRL 34936) OX=426428 GN=FOXG_01494 PE=3 SV=1	5	4	0.1038	36787.1	6.85
$243-1	tr|A0A0D2XEE2|A0A0D2XEE2_FUSO4 HABP4_PAI-RBP1 domain-containing protein OS=Fusarium oxysporum f. sp. lycopersici (strain 4287 / CBS 123668 / FGSC 9935 / NRRL 34936) OX=426428 GN=FOXG_02274 PE=4 SV=1	5	4	0.1261	35881.4	6.09
$244-1	tr|A0A0D2XGV1|A0A0D2XGV1_FUSO4 Translation initiation factor 1A OS=Fusarium oxysporum f. sp. lycopersici (strain 4287 / CBS 123668 / FGSC 9935 / NRRL 34936) OX=426428 GN=FOXG_03145 PE=3 SV=1	5	4	0.2215	17758.4	4.92
$245-1	tr|A0A0D2XHK3|A0A0D2XHK3_FUSO4 PH domain-containing protein OS=Fusarium oxysporum f. sp. lycopersici (strain 4287 / CBS 123668 / FGSC 9935 / NRRL 34936) OX=426428 GN=FOXG_03401 PE=3 SV=1	5	4	0.0306	141525	6.25
$246-1	tr|A0A0D2XJ74|A0A0D2XJ74_FUSO4 Uncharacterized protein OS=Fusarium oxysporum f. sp. lycopersici (strain 4287 / CBS 123668 / FGSC 9935 / NRRL 34936) OX=426428 GN=FOXG_03983 PE=3 SV=1	5	4	0.1091	42168.6	5.03
$247-1	tr|A0A0D2XWC7|A0A0D2XWC7_FUSO4 ATP-dependent RNA helicase DBP10 OS=Fusarium oxysporum f. sp. lycopersici (strain 4287 / CBS 123668 / FGSC 9935 / NRRL 34936) OX=426428 GN=FOXG_08293 PE=3 SV=1	5	4	0.0524	98956.3	8.77
$248-1	tr|A0A0D2XZ23|A0A0D2XZ23_FUSO4 40S ribosomal protein S17 OS=Fusarium oxysporum f. sp. lycopersici (strain 4287 / CBS 123668 / FGSC 9935 / NRRL 34936) OX=426428 GN=FOXG_09245 PE=3 SV=1	5	4	0.2857	17042.3	9.81
$249-1	tr|A0A0D2Y7J6|A0A0D2Y7J6_FUSO4 Catalase-peroxidase OS=Fusarium oxysporum f. sp. lycopersici (strain 4287 / CBS 123668 / FGSC 9935 / NRRL 34936) OX=426428 GN=katG PE=3 SV=1	5	4	0.0587	88567	6.56
$250-1	tr|A0A0D2Y960|A0A0D2Y960_FUSO4 Importin N-terminal domain-containing protein OS=Fusarium oxysporum f. sp. lycopersici (strain 4287 / CBS 123668 / FGSC 9935 / NRRL 34936) OX=426428 GN=FOXG_12830 PE=3 SV=1	5	4	0.0352	123694	5.24
$251-1	tr|A0A0J9UJF4|A0A0J9UJF4_FUSO4 ATP-dependent RNA helicase SUB2 OS=Fusarium oxysporum f. sp. lycopersici (strain 4287 / CBS 123668 / FGSC 9935 / NRRL 34936) OX=426428 GN=FOXG_03138 PE=4 SV=1	5	4	0.0812	48714.1	5.95
$251-2	tr|A0A0D2XGU4|A0A0D2XGU4_FUSO4 ATP-dependent RNA helicase SUB2 OS=Fusarium oxysporum f. sp. lycopersici (strain 4287 / CBS 123668 / FGSC 9935 / NRRL 34936) OX=426428 GN=FOXG_03138 PE=4 SV=1	5	4	0.0806	48971.3	5.74
$252-1	tr|A0A0J9UJP3|A0A0J9UJP3_FUSO4 AMP-binding domain-containing protein OS=Fusarium oxysporum f. sp. lycopersici (strain 4287 / CBS 123668 / FGSC 9935 / NRRL 34936) OX=426428 GN=FOXG_03354 PE=4 SV=1	5	4	0.0654	68541.9	6.03
$252-2	tr|A0A0J9UIY4|A0A0J9UIY4_FUSO4 AMP-binding domain-containing protein OS=Fusarium oxysporum f. sp. lycopersici (strain 4287 / CBS 123668 / FGSC 9935 / NRRL 34936) OX=426428 GN=FOXG_03354 PE=4 SV=1	5	4	0.0631	71405.1	5.67
$252-3	tr|A0A0J9WIZ9|A0A0J9WIZ9_FUSO4 AMP-binding domain-containing protein OS=Fusarium oxysporum f. sp. lycopersici (strain 4287 / CBS 123668 / FGSC 9935 / NRRL 34936) OX=426428 GN=FOXG_03354 PE=4 SV=1	5	4	0.0721	61842.4	5.79
$252-4	tr|A0A0J9UMN5|A0A0J9UMN5_FUSO4 AMP-binding domain-containing protein OS=Fusarium oxysporum f. sp. lycopersici (strain 4287 / CBS 123668 / FGSC 9935 / NRRL 34936) OX=426428 GN=FOXG_03354 PE=4 SV=1	5	4	0.0693	64705.5	5.48
$253-1	tr|A0A0J9V4V8|A0A0J9V4V8_FUSO4 Uncharacterized protein OS=Fusarium oxysporum f. sp. lycopersici (strain 4287 / CBS 123668 / FGSC 9935 / NRRL 34936) OX=426428 GN=FOXG_08028 PE=3 SV=1	5	4	0.0621	72317.6	5.17
$254-1	tr|Q6XPX0|Q6XPX0_FUSOX G protein beta subunit OS=Fusarium oxysporum f. sp. lycopersici OX=59765 GN=fgb1 PE=3 SV=1	5	4	0.1309	39663.3	6.78
$254-2	tr|A0A0C4DHW2|A0A0C4DHW2_FUSO4 G protein beta subunit OS=Fusarium oxysporum f. sp. lycopersici (strain 4287 / CBS 123668 / FGSC 9935 / NRRL 34936) OX=426428 GN=FOXG_11532 PE=3 SV=1	5	4	0.1309	39663.3	6.78
$255-1	sp|A0A0D2YG01|FUB8_FUSO4 Non-canonical non-ribosomal peptide synthetase FUB8 OS=Fusarium oxysporum f. sp. lycopersici (strain 4287 / CBS 123668 / FGSC 9935 / NRRL 34936) OX=426428 GN=FUB8 PE=1 SV=1	4	4	0.0425	115083	5.79
$256-1	sp|A0A0D2YG10|FUB1_FUSO4 Reducing polyketide synthase FUB1 OS=Fusarium oxysporum f. sp. lycopersici (strain 4287 / CBS 123668 / FGSC 9935 / NRRL 34936) OX=426428 GN=FUB1 PE=1 SV=2	4	4	0.0199	260091	5.72
$256-2	tr|A0A1D6QVK6|A0A1D6QVK6_FUSO4 Carrier domain-containing protein OS=Fusarium oxysporum f. sp. lycopersici (strain 4287 / CBS 123668 / FGSC 9935 / NRRL 34936) OX=426428 PE=4 SV=1	4	4	0.0202	256475	5.79
$257-1	tr|A0A0C4DHS7|A0A0C4DHS7_FUSO4 G-protein beta like WD repeat protein OS=Fusarium oxysporum f. sp. lycopersici (strain 4287 / CBS 123668 / FGSC 9935 / NRRL 34936) OX=426428 GN=FOXG_05557 PE=4 SV=1	4	4	0.1108	35030.2	6.55
$258-1	tr|A0A0C4DIK3|A0A0C4DIK3_FUSO4 Peptidase S53 domain-containing protein OS=Fusarium oxysporum f. sp. lycopersici (strain 4287 / CBS 123668 / FGSC 9935 / NRRL 34936) OX=426428 GN=FOXG_17187 PE=4 SV=1	4	4	0.1132	58574.8	5.65
$259-1	tr|A0A0D2X972|A0A0D2X972_FUSO4 Carboxypeptidase Y receptor OS=Fusarium oxysporum f. sp. lycopersici (strain 4287 / CBS 123668 / FGSC 9935 / NRRL 34936) OX=426428 GN=FOXG_00432 PE=4 SV=1	4	4	0.0234	156710	5.31
$260-1	tr|A0A0D2XA98|A0A0D2XA98_FUSO4 RRF domain-containing protein OS=Fusarium oxysporum f. sp. lycopersici (strain 4287 / CBS 123668 / FGSC 9935 / NRRL 34936) OX=426428 GN=FOXG_00813 PE=3 SV=1	4	4	0.1734	30392.5	9.61
$261-1	tr|A0A0D2XAA2|A0A0D2XAA2_FUSO4 PH domain-containing protein OS=Fusarium oxysporum f. sp. lycopersici (strain 4287 / CBS 123668 / FGSC 9935 / NRRL 34936) OX=426428 GN=FOXG_00817 PE=4 SV=1	4	4	0.0855	61966.2	5.01
$262-1	tr|A0A0D2XAF4|A0A0D2XAF4_FUSO4 Endoplasmic reticulum transmembrane protein OS=Fusarium oxysporum f. sp. lycopersici (strain 4287 / CBS 123668 / FGSC 9935 / NRRL 34936) OX=426428 GN=FOXG_00869 PE=3 SV=1	4	4	0.2459	14191.1	9.14
$263-1	tr|A0A0D2XAI5|A0A0D2XAI5_FUSO4 NADH-cytochrome b5 reductase OS=Fusarium oxysporum f. sp. lycopersici (strain 4287 / CBS 123668 / FGSC 9935 / NRRL 34936) OX=426428 PE=3 SV=1	4	4	0.1295	36229.9	9.17
$263-2	tr|A0A0J9U8F9|A0A0J9U8F9_FUSO4 NADH-cytochrome b5 reductase OS=Fusarium oxysporum f. sp. lycopersici (strain 4287 / CBS 123668 / FGSC 9935 / NRRL 34936) OX=426428 GN=FOXG_00901 PE=3 SV=1	4	4	0.1295	36256.9	9.17
$264-1	tr|A0A0D2XAU5|A0A0D2XAU5_FUSO4 GTP-binding protein ypt5 OS=Fusarium oxysporum f. sp. lycopersici (strain 4287 / CBS 123668 / FGSC 9935 / NRRL 34936) OX=426428 GN=FOXG_01011 PE=4 SV=1	4	4	0.1591	23973.8	8.73
$265-1	tr|A0A0D2XCF0|A0A0D2XCF0_FUSO4 Mitochondrial import receptor subunit tom-40 OS=Fusarium oxysporum f. sp. lycopersici (strain 4287 / CBS 123668 / FGSC 9935 / NRRL 34936) OX=426428 GN=FOXG_01573 PE=3 SV=1	4	4	0.1124	38581.5	6.45
$266-1	tr|A0A0D2XCQ6|A0A0D2XCQ6_FUSO4 Eukaryotic translation initiation factor 3 subunit M OS=Fusarium oxysporum f. sp. lycopersici (strain 4287 / CBS 123668 / FGSC 9935 / NRRL 34936) OX=426428 GN=FOXG_01679 PE=3 SV=1	4	4	0.1101	50642.4	5.38
$267-1	tr|A0A0D2XD29|A0A0D2XD29_FUSO4 H(+)-transporting two-sector ATPase OS=Fusarium oxysporum f. sp. lycopersici (strain 4287 / CBS 123668 / FGSC 9935 / NRRL 34936) OX=426428 PE=3 SV=1	4	4	0.0715	67799.2	5.28
$267-2	tr|A0A0J9UCJ3|A0A0J9UCJ3_FUSO4 H(+)-transporting two-sector ATPase OS=Fusarium oxysporum f. sp. lycopersici (strain 4287 / CBS 123668 / FGSC 9935 / NRRL 34936) OX=426428 GN=FOXG_01804 PE=3 SV=1	4	4	0.0558	85970.1	6.07
$267-3	tr|A0A0J9UFA2|A0A0J9UFA2_FUSO4 H(+)-transporting two-sector ATPase OS=Fusarium oxysporum f. sp. lycopersici (strain 4287 / CBS 123668 / FGSC 9935 / NRRL 34936) OX=426428 GN=FOXG_01804 PE=3 SV=1	4	4	0.0746	65221.6	5.21
$268-1	tr|A0A0D2XEB5|A0A0D2XEB5_FUSO4 Uncharacterized protein OS=Fusarium oxysporum f. sp. lycopersici (strain 4287 / CBS 123668 / FGSC 9935 / NRRL 34936) OX=426428 GN=FOXG_02247 PE=4 SV=1	4	4	0.2332	23741.7	4.16
$269-1	tr|A0A0D2XGK3|A0A0D2XGK3_FUSO4 Phosphoinositide phospholipase C OS=Fusarium oxysporum f. sp. lycopersici (strain 4287 / CBS 123668 / FGSC 9935 / NRRL 34936) OX=426428 PE=4 SV=1	4	4	0.0302	81333	6.87
$269-2	tr|A0A0J9UKX7|A0A0J9UKX7_FUSO4 Phosphoinositide phospholipase C OS=Fusarium oxysporum f. sp. lycopersici (strain 4287 / CBS 123668 / FGSC 9935 / NRRL 34936) OX=426428 GN=FOXG_03046 PE=4 SV=1	4	4	0.0294	83678.9	8.38
$270-1	tr|A0A0D2XK89|A0A0D2XK89_FUSO4 Succinate--CoA ligase [ADP-forming] subunit alpha, mitochondrial OS=Fusarium oxysporum f. sp. lycopersici (strain 4287 / CBS 123668 / FGSC 9935 / NRRL 34936) OX=426428 GN=FOXG_04362 PE=3 SV=1	4	4	0.1277	34461	8.8
$271-1	tr|A0A0D2XLD0|A0A0D2XLD0_FUSO4 NmrA domain-containing protein OS=Fusarium oxysporum f. sp. lycopersici (strain 4287 / CBS 123668 / FGSC 9935 / NRRL 34936) OX=426428 GN=FOXG_04754 PE=4 SV=1	4	4	0.1074	35997.5	6.22
$272-1	tr|A0A0D2XME7|A0A0D2XME7_FUSO4 Uncharacterized protein OS=Fusarium oxysporum f. sp. lycopersici (strain 4287 / CBS 123668 / FGSC 9935 / NRRL 34936) OX=426428 GN=FOXG_05124 PE=3 SV=1	4	4	0.1229	39406.5	7.58
$273-1	tr|A0A0D2XMQ2|A0A0D2XMQ2_FUSO4 Multiprotein-bridging factor 1 OS=Fusarium oxysporum f. sp. lycopersici (strain 4287 / CBS 123668 / FGSC 9935 / NRRL 34936) OX=426428 GN=FOXG_05229 PE=3 SV=1	4	4	0.2829	16301.3	10.05
$274-1	tr|A0A0D2XNB2|A0A0D2XNB2_FUSO4 MICOS complex subunit MIC12 OS=Fusarium oxysporum f. sp. lycopersici (strain 4287 / CBS 123668 / FGSC 9935 / NRRL 34936) OX=426428 GN=FOXG_05442 PE=3 SV=1	4	4	0.1375	26123	8.77
$275-1	tr|A0A0D2XQH2|A0A0D2XQH2_FUSO4 Uncharacterized protein OS=Fusarium oxysporum f. sp. lycopersici (strain 4287 / CBS 123668 / FGSC 9935 / NRRL 34936) OX=426428 GN=FOXG_06218 PE=4 SV=1	4	4	0.0629	62870.2	9.16
$276-1	tr|A0A0D2XUP9|A0A0D2XUP9_FUSO4 60S ribosomal protein L27-A OS=Fusarium oxysporum f. sp. lycopersici (strain 4287 / CBS 123668 / FGSC 9935 / NRRL 34936) OX=426428 GN=FOXG_07704 PE=3 SV=1	4	4	0.1778	15705.3	10.54
$277-1	tr|A0A0D2XV62|A0A0D2XV62_FUSO4 Nucleolar protein 16 OS=Fusarium oxysporum f. sp. lycopersici (strain 4287 / CBS 123668 / FGSC 9935 / NRRL 34936) OX=426428 GN=FOXG_07870 PE=3 SV=1	4	4	0.1674	24204.2	9.74
$278-1	tr|A0A0D2XWA9|A0A0D2XWA9_FUSO4 NADPH--cytochrome P450 reductase OS=Fusarium oxysporum f. sp. lycopersici (strain 4287 / CBS 123668 / FGSC 9935 / NRRL 34936) OX=426428 GN=cprA PE=3 SV=1	4	4	0.0853	77017.6	5.21
$279-1	tr|A0A0D2XYW9|A0A0D2XYW9_FUSO4 NUC153 domain-containing protein OS=Fusarium oxysporum f. sp. lycopersici (strain 4287 / CBS 123668 / FGSC 9935 / NRRL 34936) OX=426428 GN=FOXG_09191 PE=3 SV=1	4	4	0.0564	78648.9	4.68
$280-1	tr|A0A0D2XZL6|A0A0D2XZL6_FUSO4 Pyruvate dehydrogenase E1 component subunit alpha OS=Fusarium oxysporum f. sp. lycopersici (strain 4287 / CBS 123668 / FGSC 9935 / NRRL 34936) OX=426428 GN=FOXG_09447 PE=4 SV=1	4	4	0.088	45402.1	6.78
$281-1	tr|A0A0D2Y255|A0A0D2Y255_FUSO4 Thioredoxin 1 OS=Fusarium oxysporum f. sp. lycopersici (strain 4287 / CBS 123668 / FGSC 9935 / NRRL 34936) OX=426428 GN=FOXG_10349 PE=4 SV=1	4	4	0.3433	14403.1	5.15
$282-1	tr|A0A0D2Y7Y4|A0A0D2Y7Y4_FUSO4 3-phytase OS=Fusarium oxysporum f. sp. lycopersici (strain 4287 / CBS 123668 / FGSC 9935 / NRRL 34936) OX=426428 GN=FOXG_12400 PE=3 SV=1	4	4	0.0907	53411	8.55
$283-1	tr|A0A0D2Y8P1|A0A0D2Y8P1_FUSO4 40S ribosomal protein S23 OS=Fusarium oxysporum f. sp. lycopersici (strain 4287 / CBS 123668 / FGSC 9935 / NRRL 34936) OX=426428 GN=FOXG_12657 PE=3 SV=1	4	4	0.3517	15744.3	10.4
$284-1	tr|A0A0E3X8F3|A0A0E3X8F3_FUSOX Retrotransposase OS=Fusarium oxysporum f. sp. lycopersici OX=59765 PE=4 SV=1	4	4	0.0164	165705	7.76
$285-1	tr|A0A0J9U5B2|A0A0J9U5B2_FUSO4 FK506-binding protein OS=Fusarium oxysporum f. sp. lycopersici (strain 4287 / CBS 123668 / FGSC 9935 / NRRL 34936) OX=426428 GN=FOXG_00329 PE=3 SV=1	4	4	0.0799	50422.8	4.39
$285-2	tr|A0A0D2X8W9|A0A0D2X8W9_FUSO4 Peptidylprolyl isomerase OS=Fusarium oxysporum f. sp. lycopersici (strain 4287 / CBS 123668 / FGSC 9935 / NRRL 34936) OX=426428 PE=4 SV=1	4	4	0.1045	39574.1	11.76
$286-1	tr|A0A0J9U9Z1|A0A0J9U9Z1_FUSO4 Uncharacterized protein OS=Fusarium oxysporum f. sp. lycopersici (strain 4287 / CBS 123668 / FGSC 9935 / NRRL 34936) OX=426428 GN=FOXG_18041 PE=4 SV=1	4	4	0.1352	37591.1	9.27
$286-2	tr|A0A0J9U985|A0A0J9U985_FUSO4 Uncharacterized protein OS=Fusarium oxysporum f. sp. lycopersici (strain 4287 / CBS 123668 / FGSC 9935 / NRRL 34936) OX=426428 GN=FOXG_18041 PE=4 SV=1	4	4	0.1337	37781.8	9.41
$287-1	tr|A0A0J9UQR8|A0A0J9UQR8_FUSO4 Actin, gamma OS=Fusarium oxysporum f. sp. lycopersici (strain 4287 / CBS 123668 / FGSC 9935 / NRRL 34936) OX=426428 GN=FOXG_04579 PE=3 SV=1	4	4	0.1065	45908.9	5.37
$288-1	tr|A0A0J9VAK6|A0A0J9VAK6_FUSO4 Uncharacterized protein OS=Fusarium oxysporum f. sp. lycopersici (strain 4287 / CBS 123668 / FGSC 9935 / NRRL 34936) OX=426428 GN=FOXG_20034 PE=4 SV=1	4	4	0.0187	202865	5.15
$289-1	tr|A0A0J9WKP4|A0A0J9WKP4_FUSO4 Chitin synthase OS=Fusarium oxysporum f. sp. lycopersici (strain 4287 / CBS 123668 / FGSC 9935 / NRRL 34936) OX=426428 GN=FOXG_19023 PE=3 SV=1	4	4	0.0545	88805.8	6.08
$290-1	tr|A7L5W4|A7L5W4_FUSOX Chitin synthase OS=Fusarium oxysporum f. sp. lycopersici OX=59765 PE=4 SV=1	4	4	0.0253	198285	5.59
$290-2	tr|A0A0C4DHR7|A0A0C4DHR7_FUSO4 Chitin synthase OS=Fusarium oxysporum f. sp. lycopersici (strain 4287 / CBS 123668 / FGSC 9935 / NRRL 34936) OX=426428 GN=FOXG_04163 PE=4 SV=1	4	4	0.0253	198285	5.59
$291-1	tr|A0A0D2XP20|A0A0D2XP20_FUSO4 40S ribosomal protein S30 OS=Fusarium oxysporum f. sp. lycopersici (strain 4287 / CBS 123668 / FGSC 9935 / NRRL 34936) OX=426428 GN=FOXG_05706 PE=3 SV=1	14	3	0.4032	6877.06	11.77
$292-1	tr|A0A0D2XH90|A0A0D2XH90_FUSO4 Peptidase S59 domain-containing protein OS=Fusarium oxysporum f. sp. lycopersici (strain 4287 / CBS 123668 / FGSC 9935 / NRRL 34936) OX=426428 PE=3 SV=1	12	3	0.0204	130635	5.38
$292-2	tr|A0A0J9UMA8|A0A0J9UMA8_FUSO4 Peptidase S59 domain-containing protein OS=Fusarium oxysporum f. sp. lycopersici (strain 4287 / CBS 123668 / FGSC 9935 / NRRL 34936) OX=426428 GN=FOXG_18524 PE=3 SV=1	12	3	0.0134	204849	5.45
$292-3	tr|A0A0J9WIX1|A0A0J9WIX1_FUSO4 Peptidase S59 domain-containing protein OS=Fusarium oxysporum f. sp. lycopersici (strain 4287 / CBS 123668 / FGSC 9935 / NRRL 34936) OX=426428 GN=FOXG_18524 PE=3 SV=1	12	3	0.0136	202960	5.45
$293-1	tr|A0A0C4DHT3|A0A0C4DHT3_FUSO4 Tubulin beta chain OS=Fusarium oxysporum f. sp. lycopersici (strain 4287 / CBS 123668 / FGSC 9935 / NRRL 34936) OX=426428 GN=FOXG_06228 PE=3 SV=1	10	3	0.083	49818.5	4.8
$293-2	tr|A0A2C8CYR1|A0A2C8CYR1_FUSOX Tubulin beta chain OS=Fusarium oxysporum f. sp. lycopersici OX=59765 GN=tub2 PE=3 SV=1	10	3	0.083	49819.5	4.73
$294-1	tr|A0A0D2XPF5|A0A0D2XPF5_FUSO4 Protein disulfide-isomerase OS=Fusarium oxysporum f. sp. lycopersici (strain 4287 / CBS 123668 / FGSC 9935 / NRRL 34936) OX=426428 GN=FOXG_05843 PE=4 SV=1	9	3	0.0475	54458	5.46
$295-1	tr|A0A0J9V3E8|A0A0J9V3E8_FUSO4 H/ACA ribonucleoprotein complex subunit OS=Fusarium oxysporum f. sp. lycopersici (strain 4287 / CBS 123668 / FGSC 9935 / NRRL 34936) OX=426428 GN=FOXG_08125 PE=3 SV=1	8	3	0.1287	20670.2	10.93
$295-2	tr|A0A0D2XVW3|A0A0D2XVW3_FUSO4 H/ACA ribonucleoprotein complex subunit OS=Fusarium oxysporum f. sp. lycopersici (strain 4287 / CBS 123668 / FGSC 9935 / NRRL 34936) OX=426428 GN=FOXG_08125 PE=3 SV=1	8	3	0.1238	21156.7	11.51
$296-1	tr|A0A0D2XEN0|A0A0D2XEN0_FUSO4 40S ribosomal protein S7 OS=Fusarium oxysporum f. sp. lycopersici (strain 4287 / CBS 123668 / FGSC 9935 / NRRL 34936) OX=426428 GN=FOXG_02366 PE=3 SV=1	7	3	0.1182	23123.2	10.2
$297-1	tr|A0A0D2X867|A0A0D2X867_FUSO4 Uncharacterized protein OS=Fusarium oxysporum f. sp. lycopersici (strain 4287 / CBS 123668 / FGSC 9935 / NRRL 34936) OX=426428 GN=FOXG_00075 PE=3 SV=1	6	3	0.0433	75864.6	6.66
$298-1	tr|A0A0D2XHH6|A0A0D2XHH6_FUSO4 Alpha-NAC OS=Fusarium oxysporum f. sp. lycopersici (strain 4287 / CBS 123668 / FGSC 9935 / NRRL 34936) OX=426428 GN=FOXG_03374 PE=3 SV=1	6	3	0.1435	23078.9	4.55
$299-1	tr|A0A0D2XUS1|A0A0D2XUS1_FUSO4 40S ribosomal protein S25 OS=Fusarium oxysporum f. sp. lycopersici (strain 4287 / CBS 123668 / FGSC 9935 / NRRL 34936) OX=426428 GN=FOXG_07726 PE=3 SV=1	6	3	0.5366	4459.22	9.43
$300-1	tr|A0A0D2XZ60|A0A0D2XZ60_FUSO4 50S ribosomal protein LP2 OS=Fusarium oxysporum f. sp. lycopersici (strain 4287 / CBS 123668 / FGSC 9935 / NRRL 34936) OX=426428 GN=FOXG_09282 PE=3 SV=1	6	3	0.4909	11107	4.11
$301-1	tr|A0A0J9U8S2|A0A0J9U8S2_FUSO4 Uncharacterized protein OS=Fusarium oxysporum f. sp. lycopersici (strain 4287 / CBS 123668 / FGSC 9935 / NRRL 34936) OX=426428 GN=FOXG_00964 PE=4 SV=1	6	3	0.0089	258716	4.7
$301-2	tr|A0A0J9UBC0|A0A0J9UBC0_FUSO4 Uncharacterized protein OS=Fusarium oxysporum f. sp. lycopersici (strain 4287 / CBS 123668 / FGSC 9935 / NRRL 34936) OX=426428 GN=FOXG_00964 PE=4 SV=1	6	3	0.009	256235	4.72
$301-3	tr|A0A0D2XAP8|A0A0D2XAP8_FUSO4 Uncharacterized protein OS=Fusarium oxysporum f. sp. lycopersici (strain 4287 / CBS 123668 / FGSC 9935 / NRRL 34936) OX=426428 GN=FOXG_00964 PE=4 SV=1	6	3	0.0089	260965	4.69
$302-1	tr|A0A0J9VMJ9|A0A0J9VMJ9_FUSO4 Uncharacterized protein OS=Fusarium oxysporum f. sp. lycopersici (strain 4287 / CBS 123668 / FGSC 9935 / NRRL 34936) OX=426428 GN=FOXG_11731 PE=4 SV=1	6	3	0.0483	64374.9	6.26
$302-2	tr|A0A0J9VMZ8|A0A0J9VMZ8_FUSO4 Uncharacterized protein OS=Fusarium oxysporum f. sp. lycopersici (strain 4287 / CBS 123668 / FGSC 9935 / NRRL 34936) OX=426428 GN=FOXG_11731 PE=4 SV=1	6	3	0.048	64746.3	6.45
$303-1	tr|A0A0D2X8T7|A0A0D2X8T7_FUSO4 GTP-binding nuclear protein OS=Fusarium oxysporum f. sp. lycopersici (strain 4287 / CBS 123668 / FGSC 9935 / NRRL 34936) OX=426428 GN=FOXG_00296 PE=3 SV=1	5	3	0.213	24481.8	6.91
$304-1	tr|A0A0D2X919|A0A0D2X919_FUSO4 ADP-ribosylation factor OS=Fusarium oxysporum f. sp. lycopersici (strain 4287 / CBS 123668 / FGSC 9935 / NRRL 34936) OX=426428 GN=FOXG_00379 PE=3 SV=1	5	3	0.1858	20974.8	6.32
$305-1	tr|A0A0D2XA89|A0A0D2XA89_FUSO4 PSP1 C-terminal domain-containing protein OS=Fusarium oxysporum f. sp. lycopersici (strain 4287 / CBS 123668 / FGSC 9935 / NRRL 34936) OX=426428 GN=FOXG_00804 PE=4 SV=1	5	3	0.0257	96358.2	6.91
$306-1	tr|A0A0D2XAZ8|A0A0D2XAZ8_FUSO4 RNA cytidine acetyltransferase OS=Fusarium oxysporum f. sp. lycopersici (strain 4287 / CBS 123668 / FGSC 9935 / NRRL 34936) OX=426428 GN=NAT10 PE=3 SV=1	5	3	0.0244	119290	6.72
$307-1	tr|A0A0D2XN24|A0A0D2XN24_FUSO4 Ribonucloprotein OS=Fusarium oxysporum f. sp. lycopersici (strain 4287 / CBS 123668 / FGSC 9935 / NRRL 34936) OX=426428 GN=FOXG_05353 PE=3 SV=1	5	3	0.2823	13461.4	6.82
$308-1	tr|A0A0D2XX48|A0A0D2XX48_FUSO4 Uncharacterized protein OS=Fusarium oxysporum f. sp. lycopersici (strain 4287 / CBS 123668 / FGSC 9935 / NRRL 34936) OX=426428 GN=FOXG_08564 PE=3 SV=1	5	3	0.106	23703.1	9.57
$309-1	tr|A0A0D2XX58|A0A0D2XX58_FUSO4 Uncharacterized protein OS=Fusarium oxysporum f. sp. lycopersici (strain 4287 / CBS 123668 / FGSC 9935 / NRRL 34936) OX=426428 GN=FOXG_08574 PE=3 SV=1	5	3	0.0368	74136.7	9.72
$310-1	tr|A0A0D2XXC8|A0A0D2XXC8_FUSO4 Uncharacterized protein OS=Fusarium oxysporum f. sp. lycopersici (strain 4287 / CBS 123668 / FGSC 9935 / NRRL 34936) OX=426428 GN=FOXG_08644 PE=4 SV=1	5	3	0.0126	167309	5.41
$311-1	tr|A0A0D2XYK9|A0A0D2XYK9_FUSO4 Protein transporter SEC61 subunit alpha OS=Fusarium oxysporum f. sp. lycopersici (strain 4287 / CBS 123668 / FGSC 9935 / NRRL 34936) OX=426428 GN=FOXG_09081 PE=3 SV=1	5	3	0.0609	52192.9	8.55
$311-2	tr|A0A0J9VAD6|A0A0J9VAD6_FUSO4 Protein transporter SEC61 subunit alpha OS=Fusarium oxysporum f. sp. lycopersici (strain 4287 / CBS 123668 / FGSC 9935 / NRRL 34936) OX=426428 GN=FOXG_09081 PE=3 SV=1	5	3	0.0655	48323.3	8.27
$312-1	tr|A0A0D2XYT3|A0A0D2XYT3_FUSO4 Uncharacterized protein OS=Fusarium oxysporum f. sp. lycopersici (strain 4287 / CBS 123668 / FGSC 9935 / NRRL 34936) OX=426428 PE=3 SV=1	5	3	0.1236	28767.8	9.58
$312-2	tr|A0A0J9V9J5|A0A0J9V9J5_FUSO4 Uncharacterized protein OS=Fusarium oxysporum f. sp. lycopersici (strain 4287 / CBS 123668 / FGSC 9935 / NRRL 34936) OX=426428 GN=FOXG_09155 PE=3 SV=1	5	3	0.1658	21190.2	9.48
$313-1	tr|A0A0D2Y970|A0A0D2Y970_FUSO4 40S ribosomal protein S0 OS=Fusarium oxysporum f. sp. lycopersici (strain 4287 / CBS 123668 / FGSC 9935 / NRRL 34936) OX=426428 GN=RPS0 PE=3 SV=1	5	3	0.0922	31642	4.76
$314-1	tr|A0A0D2YBR6|A0A0D2YBR6_FUSO4 Uncharacterized protein OS=Fusarium oxysporum f. sp. lycopersici (strain 4287 / CBS 123668 / FGSC 9935 / NRRL 34936) OX=426428 GN=FOXG_13744 PE=3 SV=1	5	3	0.0732	43351.7	9.44
$315-1	tr|A0A0J9UF14|A0A0J9UF14_FUSO4 VPS9 domain-containing protein OS=Fusarium oxysporum f. sp. lycopersici (strain 4287 / CBS 123668 / FGSC 9935 / NRRL 34936) OX=426428 GN=FOXG_02138 PE=4 SV=1	5	3	0.0278	78149.9	6.74
$315-2	tr|A0A0J9UEA5|A0A0J9UEA5_FUSO4 VPS9 domain-containing protein OS=Fusarium oxysporum f. sp. lycopersici (strain 4287 / CBS 123668 / FGSC 9935 / NRRL 34936) OX=426428 GN=FOXG_02138 PE=4 SV=1	5	3	0.0282	76826.3	6.58
$315-3	tr|A0A0D2XE07|A0A0D2XE07_FUSO4 VPS9 domain-containing protein OS=Fusarium oxysporum f. sp. lycopersici (strain 4287 / CBS 123668 / FGSC 9935 / NRRL 34936) OX=426428 PE=4 SV=1	5	3	0.0279	78018.7	6.74
$316-1	tr|A0A0J9V4E0|A0A0J9V4E0_FUSO4 Ras-like protein Rab7 OS=Fusarium oxysporum f. sp. lycopersici (strain 4287 / CBS 123668 / FGSC 9935 / NRRL 34936) OX=426428 GN=FOXG_07888 PE=4 SV=1	5	3	0.1659	22819.7	4.95
$317-1	tr|A0A0J9V5Y9|A0A0J9V5Y9_FUSO4 Uncharacterized protein OS=Fusarium oxysporum f. sp. lycopersici (strain 4287 / CBS 123668 / FGSC 9935 / NRRL 34936) OX=426428 GN=FOXG_08311 PE=4 SV=1	5	3	0.1636	24591.5	6.5
$317-2	tr|A0A0D2XWE5|A0A0D2XWE5_FUSO4 Uncharacterized protein OS=Fusarium oxysporum f. sp. lycopersici (strain 4287 / CBS 123668 / FGSC 9935 / NRRL 34936) OX=426428 PE=4 SV=1	5	3	0.1739	23252	7.1
$317-3	tr|A0A0J9V701|A0A0J9V701_FUSO4 Uncharacterized protein OS=Fusarium oxysporum f. sp. lycopersici (strain 4287 / CBS 123668 / FGSC 9935 / NRRL 34936) OX=426428 GN=FOXG_08311 PE=4 SV=1	5	3	0.1532	26409.7	7.74
$318-1	tr|A0A0J9WHK6|A0A0J9WHK6_FUSO4 DUF2428 domain-containing protein OS=Fusarium oxysporum f. sp. lycopersici (strain 4287 / CBS 123668 / FGSC 9935 / NRRL 34936) OX=426428 GN=FOXG_01895 PE=4 SV=1	5	3	0.0138	161461	5.95
$318-2	tr|A0A0J9UCY8|A0A0J9UCY8_FUSO4 DUF2428 domain-containing protein OS=Fusarium oxysporum f. sp. lycopersici (strain 4287 / CBS 123668 / FGSC 9935 / NRRL 34936) OX=426428 GN=FOXG_01895 PE=4 SV=1	5	3	0.0129	173065	5.88
$318-3	tr|A0A0J9UDM8|A0A0J9UDM8_FUSO4 DUF2428 domain-containing protein OS=Fusarium oxysporum f. sp. lycopersici (strain 4287 / CBS 123668 / FGSC 9935 / NRRL 34936) OX=426428 GN=FOXG_01895 PE=4 SV=1	5	3	0.0151	148291	6.21
$319-1	tr|A0A0J9WIV2|A0A0J9WIV2_FUSO4 Uncharacterized protein OS=Fusarium oxysporum f. sp. lycopersici (strain 4287 / CBS 123668 / FGSC 9935 / NRRL 34936) OX=426428 GN=FOXG_03239 PE=4 SV=1	5	3	0.021	113434	6.22
$320-1	sp|A0A0D2YG02|FUB7_FUSO4 Sulfhydrylase FUB7 OS=Fusarium oxysporum f. sp. lycopersici (strain 4287 / CBS 123668 / FGSC 9935 / NRRL 34936) OX=426428 GN=FUB7 PE=1 SV=1	4	3	0.0831	47109.5	5.89
$321-1	tr|A0A0C4DI50|A0A0C4DI50_FUSO4 Glycosyl hydrolase family 17 OS=Fusarium oxysporum f. sp. lycopersici (strain 4287 / CBS 123668 / FGSC 9935 / NRRL 34936) OX=426428 GN=FOXG_16943 PE=3 SV=1	4	3	0.0993	33551	9.5
$322-1	tr|A0A0D2X8E0|A0A0D2X8E0_FUSO4 60S ribosomal protein L36 OS=Fusarium oxysporum f. sp. lycopersici (strain 4287 / CBS 123668 / FGSC 9935 / NRRL 34936) OX=426428 GN=FOXG_00149 PE=3 SV=1	4	3	0.2381	11736.6	11.69
$323-1	tr|A0A0D2XDM0|A0A0D2XDM0_FUSO4 DnaJ like subfamily A member 2 OS=Fusarium oxysporum f. sp. lycopersici (strain 4287 / CBS 123668 / FGSC 9935 / NRRL 34936) OX=426428 GN=FOXG_02000 PE=3 SV=1	4	3	0.0986	45698	5.74
$324-1	tr|A0A0D2XFX6|A0A0D2XFX6_FUSO4 Uncharacterized protein OS=Fusarium oxysporum f. sp. lycopersici (strain 4287 / CBS 123668 / FGSC 9935 / NRRL 34936) OX=426428 GN=FOXG_02815 PE=3 SV=1	4	3	0.0445	89021.8	6.34
$325-1	tr|A0A0D2XLC8|A0A0D2XLC8_FUSO4 MFS domain-containing protein OS=Fusarium oxysporum f. sp. lycopersici (strain 4287 / CBS 123668 / FGSC 9935 / NRRL 34936) OX=426428 GN=FOXG_04752 PE=4 SV=1	4	3	0.0741	53584.6	6.95
$326-1	tr|A0A0D2XNM1|A0A0D2XNM1_FUSO4 Uncharacterized protein OS=Fusarium oxysporum f. sp. lycopersici (strain 4287 / CBS 123668 / FGSC 9935 / NRRL 34936) OX=426428 PE=3 SV=1	4	3	0.0099	285439	5.48
$326-2	tr|A0A0J9UVJ9|A0A0J9UVJ9_FUSO4 Uncharacterized protein OS=Fusarium oxysporum f. sp. lycopersici (strain 4287 / CBS 123668 / FGSC 9935 / NRRL 34936) OX=426428 GN=FOXG_05552 PE=3 SV=1	4	3	0.0102	276837	5.39
$326-3	tr|A0A0J9UTM3|A0A0J9UTM3_FUSO4 Uncharacterized protein OS=Fusarium oxysporum f. sp. lycopersici (strain 4287 / CBS 123668 / FGSC 9935 / NRRL 34936) OX=426428 GN=FOXG_05552 PE=3 SV=1	4	3	0.0104	272323	5.59
$326-4	tr|A0A0J9WKZ5|A0A0J9WKZ5_FUSO4 Uncharacterized protein OS=Fusarium oxysporum f. sp. lycopersici (strain 4287 / CBS 123668 / FGSC 9935 / NRRL 34936) OX=426428 GN=FOXG_05552 PE=3 SV=1	4	3	0.0097	290068	5.47
$327-1	tr|A0A0D2XQN4|A0A0D2XQN4_FUSO4 Isocitrate dehydrogenase [NAD] subunit, mitochondrial OS=Fusarium oxysporum f. sp. lycopersici (strain 4287 / CBS 123668 / FGSC 9935 / NRRL 34936) OX=426428 GN=FOXG_06282 PE=3 SV=1	4	3	0.0761	41005.7	7.05
$328-1	tr|A0A0D2XWU1|A0A0D2XWU1_FUSO4 Prolyl-tRNA synthetase OS=Fusarium oxysporum f. sp. lycopersici (strain 4287 / CBS 123668 / FGSC 9935 / NRRL 34936) OX=426428 GN=FOXG_08457 PE=3 SV=1	4	3	0.0561	62359.5	6.25
$329-1	tr|A0A0D2XWY9|A0A0D2XWY9_FUSO4 50S ribosomal protein L11 OS=Fusarium oxysporum f. sp. lycopersici (strain 4287 / CBS 123668 / FGSC 9935 / NRRL 34936) OX=426428 GN=FOXG_08505 PE=3 SV=1	4	3	0.2273	16511.2	10.02
$330-1	tr|A0A0D2XZ56|A0A0D2XZ56_FUSO4 Succinate dehydrogenase [ubiquinone] iron-sulfur subunit, mitochondrial OS=Fusarium oxysporum f. sp. lycopersici (strain 4287 / CBS 123668 / FGSC 9935 / NRRL 34936) OX=426428 GN=FOXG_09278 PE=3 SV=1	4	3	0.1115	31534.8	8.98
$331-1	tr|A0A0D2XZN1|A0A0D2XZN1_FUSO4 Coatomer subunit delta OS=Fusarium oxysporum f. sp. lycopersici (strain 4287 / CBS 123668 / FGSC 9935 / NRRL 34936) OX=426428 PE=3 SV=1	4	3	0.0924	52652.7	5.66
$331-2	tr|A0A0J9WPA6|A0A0J9WPA6_FUSO4 Coatomer subunit delta OS=Fusarium oxysporum f. sp. lycopersici (strain 4287 / CBS 123668 / FGSC 9935 / NRRL 34936) OX=426428 GN=FOXG_09462 PE=3 SV=1	4	3	0.0922	52327.9	8.26
$332-1	tr|A0A0D2Y496|A0A0D2Y496_FUSO4 26S protease regulatory subunit 8 OS=Fusarium oxysporum f. sp. lycopersici (strain 4287 / CBS 123668 / FGSC 9935 / NRRL 34936) OX=426428 GN=FOXG_11098 PE=3 SV=1	4	3	0.0668	43426	8.51
$333-1	tr|A0A0D2Y4T2|A0A0D2Y4T2_FUSO4 Uncharacterized protein OS=Fusarium oxysporum f. sp. lycopersici (strain 4287 / CBS 123668 / FGSC 9935 / NRRL 34936) OX=426428 GN=FOXG_11285 PE=3 SV=1	4	3	0.0293	126450	6.29
$334-1	tr|A0A0D2Y9W0|A0A0D2Y9W0_FUSO4 FAD-binding FR-type domain-containing protein OS=Fusarium oxysporum f. sp. lycopersici (strain 4287 / CBS 123668 / FGSC 9935 / NRRL 34936) OX=426428 GN=FOXG_13081 PE=4 SV=1	4	3	0.0753	68267.8	7.92
$335-1	tr|A0A0D2YBI0|A0A0D2YBI0_FUSO4 Uncharacterized protein OS=Fusarium oxysporum f. sp. lycopersici (strain 4287 / CBS 123668 / FGSC 9935 / NRRL 34936) OX=426428 GN=FOXG_13658 PE=4 SV=1	4	3	0.0639	40431.2	8.72
$336-1	tr|A0A0D2YH38|A0A0D2YH38_FUSO4 Sterol 24-C-methyltransferase OS=Fusarium oxysporum f. sp. lycopersici (strain 4287 / CBS 123668 / FGSC 9935 / NRRL 34936) OX=426428 GN=FOXG_15629 PE=3 SV=1	4	3	0.0864	42717.7	5.89
$337-1	tr|A0A0D2YK28|A0A0D2YK28_FUSO4 ABC transmembrane type-1 domain-containing protein OS=Fusarium oxysporum f. sp. lycopersici (strain 4287 / CBS 123668 / FGSC 9935 / NRRL 34936) OX=426428 PE=4 SV=1	4	3	0.0728	46577.4	9.22
$338-1	tr|A0A0J9U6H5|A0A0J9U6H5_FUSO4 Cytochrome c1, heme protein, mitochondrial OS=Fusarium oxysporum f. sp. lycopersici (strain 4287 / CBS 123668 / FGSC 9935 / NRRL 34936) OX=426428 GN=FOXG_00494 PE=4 SV=1	4	3	0.1127	38523.4	8.13
$338-2	tr|A0A0D2X9D3|A0A0D2X9D3_FUSO4 Cytochrome c1, heme protein, mitochondrial OS=Fusarium oxysporum f. sp. lycopersici (strain 4287 / CBS 123668 / FGSC 9935 / NRRL 34936) OX=426428 GN=FOXG_00494 PE=4 SV=1	4	3	0.1211	35756.4	8.72
$339-1	tr|A0A0J9U7D0|A0A0J9U7D0_FUSO4 Uncharacterized protein OS=Fusarium oxysporum f. sp. lycopersici (strain 4287 / CBS 123668 / FGSC 9935 / NRRL 34936) OX=426428 GN=FOXG_00723 PE=4 SV=1	4	3	0.0517	69858.7	5.59
$340-1	tr|A0A0J9UDG8|A0A0J9UDG8_FUSO4 NADH-cytochrome b5 reductase OS=Fusarium oxysporum f. sp. lycopersici (strain 4287 / CBS 123668 / FGSC 9935 / NRRL 34936) OX=426428 GN=FOXG_01870 PE=3 SV=1	4	3	0.101	32306.3	9.07
$341-1	tr|A0A0J9USW6|A0A0J9USW6_FUSO4 Structural maintenance of chromosomes protein OS=Fusarium oxysporum f. sp. lycopersici (strain 4287 / CBS 123668 / FGSC 9935 / NRRL 34936) OX=426428 GN=FOXG_04630 PE=3 SV=1	4	3	0.0187	132916	6.34
$341-2	tr|A0A0D2XL06|A0A0D2XL06_FUSO4 SMC hinge domain-containing protein OS=Fusarium oxysporum f. sp. lycopersici (strain 4287 / CBS 123668 / FGSC 9935 / NRRL 34936) OX=426428 PE=4 SV=1	4	3	0.0195	127211	6.41
$342-1	tr|A0A0J9VDX5|A0A0J9VDX5_FUSO4 Uncharacterized protein OS=Fusarium oxysporum f. sp. lycopersici (strain 4287 / CBS 123668 / FGSC 9935 / NRRL 34936) OX=426428 GN=FOXG_09771 PE=4 SV=1	4	3	0.0392	51540.9	6.74
$342-2	tr|A0A0J9VDN9|A0A0J9VDN9_FUSO4 Uncharacterized protein OS=Fusarium oxysporum f. sp. lycopersici (strain 4287 / CBS 123668 / FGSC 9935 / NRRL 34936) OX=426428 GN=FOXG_09771 PE=4 SV=1	4	3	0.0358	56223.1	6.48
$343-1	tr|A0A0J9VYF3|A0A0J9VYF3_FUSO4 Uncharacterized protein OS=Fusarium oxysporum f. sp. lycopersici (strain 4287 / CBS 123668 / FGSC 9935 / NRRL 34936) OX=426428 GN=FOXG_14180 PE=4 SV=1	4	3	0.0277	88481.8	9.62
$343-2	tr|A0A0D2XRC8|A0A0D2XRC8_FUSO4 NDC10_II domain-containing protein OS=Fusarium oxysporum f. sp. lycopersici (strain 4287 / CBS 123668 / FGSC 9935 / NRRL 34936) OX=426428 PE=4 SV=1	4	3	0.0361	67691.4	8.43
$343-3	tr|A0A0J9V515|A0A0J9V515_FUSO4 Uncharacterized protein OS=Fusarium oxysporum f. sp. lycopersici (strain 4287 / CBS 123668 / FGSC 9935 / NRRL 34936) OX=426428 GN=FOXG_07292 PE=4 SV=1	4	3	0.0325	74704.1	7.17
$343-4	tr|A0A0J9W6R1|A0A0J9W6R1_FUSO4 Uncharacterized protein OS=Fusarium oxysporum f. sp. lycopersici (strain 4287 / CBS 123668 / FGSC 9935 / NRRL 34936) OX=426428 GN=FOXG_16186 PE=4 SV=1	4	3	0.0284	86256.5	9.8
$343-5	tr|A0A0D2XRD1|A0A0D2XRD1_FUSO4 Uncharacterized protein OS=Fusarium oxysporum f. sp. lycopersici (strain 4287 / CBS 123668 / FGSC 9935 / NRRL 34936) OX=426428 PE=4 SV=1	4	3	0.034	71350.4	6.24
$343-6	tr|A0A0J9WV20|A0A0J9WV20_FUSO4 Uncharacterized protein OS=Fusarium oxysporum f. sp. lycopersici (strain 4287 / CBS 123668 / FGSC 9935 / NRRL 34936) OX=426428 GN=FOXG_06825 PE=4 SV=1	4	3	0.0272	90205.8	9.72
$343-7	tr|A0A0C4BKY8|A0A0C4BKY8_FUSO4 Uncharacterized protein OS=Fusarium oxysporum f. sp. lycopersici (strain 4287 / CBS 123668 / FGSC 9935 / NRRL 34936) OX=426428 PE=4 SV=1	4	3	0.0309	78885	8.67
$343-8	tr|A0A0D2YIC9|A0A0D2YIC9_FUSO4 Uncharacterized protein OS=Fusarium oxysporum f. sp. lycopersici (strain 4287 / CBS 123668 / FGSC 9935 / NRRL 34936) OX=426428 PE=4 SV=1	4	3	0.0273	90069.7	9.76
$343-9	tr|A0A0C4BKZ1|A0A0C4BKZ1_FUSO4 NDC10_II domain-containing protein OS=Fusarium oxysporum f. sp. lycopersici (strain 4287 / CBS 123668 / FGSC 9935 / NRRL 34936) OX=426428 PE=4 SV=1	4	3	0.0329	74223.9	8.78
$343-10	tr|A0A0J9W9C9|A0A0J9W9C9_FUSO4 Uncharacterized protein OS=Fusarium oxysporum f. sp. lycopersici (strain 4287 / CBS 123668 / FGSC 9935 / NRRL 34936) OX=426428 GN=FOXG_16742 PE=4 SV=1	4	3	0.0297	81483.9	10.1
$343-11	tr|A0A0J9W955|A0A0J9W955_FUSO4 Uncharacterized protein OS=Fusarium oxysporum f. sp. lycopersici (strain 4287 / CBS 123668 / FGSC 9935 / NRRL 34936) OX=426428 GN=FOXG_16679 PE=4 SV=1	4	3	0.0275	89232.7	9.85
$343-12	tr|A0A0C4BKR4|A0A0C4BKR4_FUSO4 Uncharacterized protein OS=Fusarium oxysporum f. sp. lycopersici (strain 4287 / CBS 123668 / FGSC 9935 / NRRL 34936) OX=426428 PE=4 SV=1	4	3	0.0258	94691	9.7
$343-13	tr|A0A0D2YJG4|A0A0D2YJG4_FUSO4 Uncharacterized protein OS=Fusarium oxysporum f. sp. lycopersici (strain 4287 / CBS 123668 / FGSC 9935 / NRRL 34936) OX=426428 PE=4 SV=1	4	3	0.0271	90555.2	9.94
$343-14	tr|A0A0D2YJM7|A0A0D2YJM7_FUSO4 Uncharacterized protein OS=Fusarium oxysporum f. sp. lycopersici (strain 4287 / CBS 123668 / FGSC 9935 / NRRL 34936) OX=426428 PE=4 SV=1	4	3	0.0293	82806.4	10.2
$343-15	tr|A0A0D2YCZ8|A0A0D2YCZ8_FUSO4 Uncharacterized protein OS=Fusarium oxysporum f. sp. lycopersici (strain 4287 / CBS 123668 / FGSC 9935 / NRRL 34936) OX=426428 PE=4 SV=1	4	3	0.026	94324.1	9.67
$343-16	tr|A0A0J9W5Z6|A0A0J9W5Z6_FUSO4 Uncharacterized protein OS=Fusarium oxysporum f. sp. lycopersici (strain 4287 / CBS 123668 / FGSC 9935 / NRRL 34936) OX=426428 GN=FOXG_15995 PE=4 SV=1	4	3	0.0272	90280.9	9.82
$343-17	tr|A0A0J9W4I1|A0A0J9W4I1_FUSO4 Uncharacterized protein OS=Fusarium oxysporum f. sp. lycopersici (strain 4287 / CBS 123668 / FGSC 9935 / NRRL 34936) OX=426428 GN=FOXG_15538 PE=4 SV=1	4	3	0.0271	90307.8	9.71
$344-1	tr|A0A0J9WFT8|A0A0J9WFT8_FUSO4 26S protease subunit rpt4 OS=Fusarium oxysporum f. sp. lycopersici (strain 4287 / CBS 123668 / FGSC 9935 / NRRL 34936) OX=426428 GN=FOXG_00191 PE=3 SV=1	4	3	0.0938	32119.8	5.37
$344-2	tr|A0A0D2X8I2|A0A0D2X8I2_FUSO4 26S protease subunit rpt4 OS=Fusarium oxysporum f. sp. lycopersici (strain 4287 / CBS 123668 / FGSC 9935 / NRRL 34936) OX=426428 GN=FOXG_00191 PE=3 SV=1	4	3	0.0691	43973.2	6.03
$345-1	tr|A0A0D2X862|A0A0D2X862_FUSO4 Uncharacterized protein OS=Fusarium oxysporum f. sp. lycopersici (strain 4287 / CBS 123668 / FGSC 9935 / NRRL 34936) OX=426428 PE=4 SV=1	3	3	0.0275	87638.4	4.83
$345-2	tr|A0A0J9U699|A0A0J9U699_FUSO4 Cortactin OS=Fusarium oxysporum f. sp. lycopersici (strain 4287 / CBS 123668 / FGSC 9935 / NRRL 34936) OX=426428 GN=FOXG_00070 PE=4 SV=1	3	3	0.0343	69801.5	4.62
$346-1	tr|A0A0D2X8H9|A0A0D2X8H9_FUSO4 HMG box domain-containing protein OS=Fusarium oxysporum f. sp. lycopersici (strain 4287 / CBS 123668 / FGSC 9935 / NRRL 34936) OX=426428 GN=FOXG_00188 PE=4 SV=1	3	3	0.1194	34524.2	10.21
$347-1	tr|A0A0D2X8P4|A0A0D2X8P4_FUSO4 Uncharacterized protein OS=Fusarium oxysporum f. sp. lycopersici (strain 4287 / CBS 123668 / FGSC 9935 / NRRL 34936) OX=426428 GN=FOXG_00253 PE=4 SV=1	3	3	0.1456	23437.9	10.52
$348-1	tr|A0A0D2X8Q2|A0A0D2X8Q2_FUSO4 PUM-HD domain-containing protein OS=Fusarium oxysporum f. sp. lycopersici (strain 4287 / CBS 123668 / FGSC 9935 / NRRL 34936) OX=426428 GN=FOXG_00261 PE=4 SV=1	3	3	0.0293	76029	8.31
$349-1	tr|A0A0D2X908|A0A0D2X908_FUSO4 Uncharacterized protein OS=Fusarium oxysporum f. sp. lycopersici (strain 4287 / CBS 123668 / FGSC 9935 / NRRL 34936) OX=426428 PE=4 SV=1	3	3	0.0234	127224	8.26
$349-2	tr|A0A0J9U825|A0A0J9U825_FUSO4 Pre-mRNA-processing ATP-dependent RNA helicase PRP5 OS=Fusarium oxysporum f. sp. lycopersici (strain 4287 / CBS 123668 / FGSC 9935 / NRRL 34936) OX=426428 GN=FOXG_00368 PE=4 SV=1	3	3	0.0238	125171	8.12
$350-1	tr|A0A0D2X938|A0A0D2X938_FUSO4 Uncharacterized protein OS=Fusarium oxysporum f. sp. lycopersici (strain 4287 / CBS 123668 / FGSC 9935 / NRRL 34936) OX=426428 GN=FOXG_00398 PE=4 SV=1	3	3	0.2383	21469.3	9.53
$351-1	tr|A0A0D2X980|A0A0D2X980_FUSO4 Dolichyl-phosphate-mannose--protein mannosyltransferase OS=Fusarium oxysporum f. sp. lycopersici (strain 4287 / CBS 123668 / FGSC 9935 / NRRL 34936) OX=426428 GN=FOXG_00440 PE=3 SV=1	3	3	0.0338	88379.4	9.03
$352-1	tr|A0A0D2X990|A0A0D2X990_FUSO4 Anthranilate phosphoribosyltransferase OS=Fusarium oxysporum f. sp. lycopersici (strain 4287 / CBS 123668 / FGSC 9935 / NRRL 34936) OX=426428 GN=FOXG_00450 PE=4 SV=1	3	3	0.0681	44685.2	5.28
$353-1	tr|A0A0D2X9H2|A0A0D2X9H2_FUSO4 UTP--glucose-1-phosphate uridylyltransferase OS=Fusarium oxysporum f. sp. lycopersici (strain 4287 / CBS 123668 / FGSC 9935 / NRRL 34936) OX=426428 GN=FOXG_00536 PE=3 SV=1	3	3	0.0441	58110.8	6.52
$353-2	tr|A0A0J9WG75|A0A0J9WG75_FUSO4 UTP--glucose-1-phosphate uridylyltransferase OS=Fusarium oxysporum f. sp. lycopersici (strain 4287 / CBS 123668 / FGSC 9935 / NRRL 34936) OX=426428 GN=FOXG_00536 PE=3 SV=1	3	3	0.0511	50292.2	6.24
$353-3	tr|A0A0J9U6R3|A0A0J9U6R3_FUSO4 UTP--glucose-1-phosphate uridylyltransferase OS=Fusarium oxysporum f. sp. lycopersici (strain 4287 / CBS 123668 / FGSC 9935 / NRRL 34936) OX=426428 GN=FOXG_00536 PE=3 SV=1	3	3	0.0469	54758.2	6
$354-1	tr|A0A0D2XA75|A0A0D2XA75_FUSO4 Protein SEY1 OS=Fusarium oxysporum f. sp. lycopersici (strain 4287 / CBS 123668 / FGSC 9935 / NRRL 34936) OX=426428 GN=SEY1 PE=3 SV=1	3	3	0.0314	95931.1	5.25
$355-1	tr|A0A0D2XA87|A0A0D2XA87_FUSO4 Ribosomal protein L15 OS=Fusarium oxysporum f. sp. lycopersici (strain 4287 / CBS 123668 / FGSC 9935 / NRRL 34936) OX=426428 PE=3 SV=1	3	3	0.0936	24033.6	11.27
$355-2	tr|A0A0J9U7B1|A0A0J9U7B1_FUSO4 Ribosomal protein L15 OS=Fusarium oxysporum f. sp. lycopersici (strain 4287 / CBS 123668 / FGSC 9935 / NRRL 34936) OX=426428 GN=FOXG_00802 PE=3 SV=1	3	3	0.0725	30552.9	11.23
$356-1	tr|A0A0D2XAU4|A0A0D2XAU4_FUSO4 MICOS complex subunit MIC60 OS=Fusarium oxysporum f. sp. lycopersici (strain 4287 / CBS 123668 / FGSC 9935 / NRRL 34936) OX=426428 GN=FOXG_01010 PE=3 SV=1	3	3	0.0456	70348.8	6.62
$357-1	tr|A0A0D2XAZ3|A0A0D2XAZ3_FUSO4 Uncharacterized protein OS=Fusarium oxysporum f. sp. lycopersici (strain 4287 / CBS 123668 / FGSC 9935 / NRRL 34936) OX=426428 GN=FOXG_01059 PE=4 SV=1	3	3	0.0332	103639	5.24
$358-1	tr|A0A0D2XB97|A0A0D2XB97_FUSO4 Uncharacterized protein OS=Fusarium oxysporum f. sp. lycopersici (strain 4287 / CBS 123668 / FGSC 9935 / NRRL 34936) OX=426428 GN=FOXG_01165 PE=3 SV=1	3	3	0.0309	87326.9	5.92
$359-1	tr|A0A0D2XCH3|A0A0D2XCH3_FUSO4 PINc domain-containing protein OS=Fusarium oxysporum f. sp. lycopersici (strain 4287 / CBS 123668 / FGSC 9935 / NRRL 34936) OX=426428 GN=FOXG_01596 PE=3 SV=1	3	3	0.1566	22729.4	9.81
$359-2	tr|A0A0J9UC13|A0A0J9UC13_FUSO4 PINc domain-containing protein OS=Fusarium oxysporum f. sp. lycopersici (strain 4287 / CBS 123668 / FGSC 9935 / NRRL 34936) OX=426428 GN=FOXG_01596 PE=3 SV=1	3	3	0.2138	16557.2	9.3
$360-1	tr|A0A0D2XDV0|A0A0D2XDV0_FUSO4 Uncharacterized protein OS=Fusarium oxysporum f. sp. lycopersici (strain 4287 / CBS 123668 / FGSC 9935 / NRRL 34936) OX=426428 GN=FOXG_02080 PE=4 SV=1	3	3	0.0721	48176.2	7.8
$361-1	tr|A0A0D2XDZ1|A0A0D2XDZ1_FUSO4 40S ribosomal protein S22 OS=Fusarium oxysporum f. sp. lycopersici (strain 4287 / CBS 123668 / FGSC 9935 / NRRL 34936) OX=426428 GN=FOXG_02122 PE=3 SV=1	3	3	0.1692	14828.1	10.11
$362-1	tr|A0A0D2XE17|A0A0D2XE17_FUSO4 Uncharacterized protein OS=Fusarium oxysporum f. sp. lycopersici (strain 4287 / CBS 123668 / FGSC 9935 / NRRL 34936) OX=426428 GN=FOXG_02148 PE=4 SV=1	3	3	0.2029	15108.6	10.08
$363-1	tr|A0A0D2XE28|A0A0D2XE28_FUSO4 Midasin OS=Fusarium oxysporum f. sp. lycopersici (strain 4287 / CBS 123668 / FGSC 9935 / NRRL 34936) OX=426428 GN=FOXG_02159 PE=3 SV=1	3	3	0.004	526756	5.07
$364-1	tr|A0A0D2XEQ6|A0A0D2XEQ6_FUSO4 Uncharacterized protein OS=Fusarium oxysporum f. sp. lycopersici (strain 4287 / CBS 123668 / FGSC 9935 / NRRL 34936) OX=426428 GN=FOXG_02393 PE=4 SV=1	3	3	0.0948	24171.8	4.77
$365-1	tr|A0A0D2XEU3|A0A0D2XEU3_FUSO4 Uncharacterized protein OS=Fusarium oxysporum f. sp. lycopersici (strain 4287 / CBS 123668 / FGSC 9935 / NRRL 34936) OX=426428 PE=3 SV=1	3	3	0.272	13367.4	10.34
$365-2	tr|A0A0J9WI59|A0A0J9WI59_FUSO4 50S ribosomal protein L14 OS=Fusarium oxysporum f. sp. lycopersici (strain 4287 / CBS 123668 / FGSC 9935 / NRRL 34936) OX=426428 GN=FOXG_02430 PE=3 SV=1	3	3	0.2595	14082.3	10.39
$366-1	tr|A0A0D2XFY5|A0A0D2XFY5_FUSO4 C2H2-type domain-containing protein OS=Fusarium oxysporum f. sp. lycopersici (strain 4287 / CBS 123668 / FGSC 9935 / NRRL 34936) OX=426428 PE=4 SV=1	3	3	0.0201	66971	5.07
$366-2	tr|A0A0J9UH44|A0A0J9UH44_FUSO4 C2H2-type domain-containing protein OS=Fusarium oxysporum f. sp. lycopersici (strain 4287 / CBS 123668 / FGSC 9935 / NRRL 34936) OX=426428 GN=FOXG_02824 PE=4 SV=1	3	3	0.0183	73401.2	5.36
$367-1	tr|A0A0D2XGL2|A0A0D2XGL2_FUSO4 Uncharacterized protein OS=Fusarium oxysporum f. sp. lycopersici (strain 4287 / CBS 123668 / FGSC 9935 / NRRL 34936) OX=426428 GN=FOXG_03055 PE=4 SV=1	3	3	0.0352	90632.9	9.5
$368-1	tr|A0A0D2XH43|A0A0D2XH43_FUSO4 Uncharacterized protein OS=Fusarium oxysporum f. sp. lycopersici (strain 4287 / CBS 123668 / FGSC 9935 / NRRL 34936) OX=426428 PE=4 SV=1	3	3	0.0773	40539.5	5.43
$368-2	tr|A0A0J9UJ20|A0A0J9UJ20_FUSO4 26S proteasome regulatory subunit N7 OS=Fusarium oxysporum f. sp. lycopersici (strain 4287 / CBS 123668 / FGSC 9935 / NRRL 34936) OX=426428 GN=FOXG_03241 PE=4 SV=1	3	3	0.074	42736.9	5.42
$369-1	tr|A0A0D2XHD6|A0A0D2XHD6_FUSO4 Uncharacterized protein OS=Fusarium oxysporum f. sp. lycopersici (strain 4287 / CBS 123668 / FGSC 9935 / NRRL 34936) OX=426428 PE=4 SV=1	3	3	0.4882	13746.3	9.6
$369-2	tr|A0A0J9UJL0|A0A0J9UJL0_FUSO4 Uncharacterized protein OS=Fusarium oxysporum f. sp. lycopersici (strain 4287 / CBS 123668 / FGSC 9935 / NRRL 34936) OX=426428 GN=FOXG_03334 PE=4 SV=1	3	3	0.3647	18874.3	10.14
$370-1	tr|A0A0D2XHQ8|A0A0D2XHQ8_FUSO4 RRM domain-containing protein OS=Fusarium oxysporum f. sp. lycopersici (strain 4287 / CBS 123668 / FGSC 9935 / NRRL 34936) OX=426428 GN=FOXG_03456 PE=4 SV=1	3	3	0.1187	29807.3	5.36
$371-1	tr|A0A0D2XI90|A0A0D2XI90_FUSO4 Importin N-terminal domain-containing protein OS=Fusarium oxysporum f. sp. lycopersici (strain 4287 / CBS 123668 / FGSC 9935 / NRRL 34936) OX=426428 GN=FOXG_03641 PE=4 SV=1	3	3	0.0319	121248	4.81
$372-1	tr|A0A0D2XIF7|A0A0D2XIF7_FUSO4 26S proteasome regulatory subunit N9 OS=Fusarium oxysporum f. sp. lycopersici (strain 4287 / CBS 123668 / FGSC 9935 / NRRL 34936) OX=426428 GN=FOXG_03710 PE=3 SV=1	3	3	0.063	43870.3	5.03
$373-1	tr|A0A0D2XJG4|A0A0D2XJG4_FUSO4 60S ribosomal protein L27a OS=Fusarium oxysporum f. sp. lycopersici (strain 4287 / CBS 123668 / FGSC 9935 / NRRL 34936) OX=426428 GN=FOXG_04074 PE=3 SV=1	3	3	0.1745	16820.4	10.68
$374-1	tr|A0A0D2XLR8|A0A0D2XLR8_FUSO4 Vacuolar protein sorting-associated protein OS=Fusarium oxysporum f. sp. lycopersici (strain 4287 / CBS 123668 / FGSC 9935 / NRRL 34936) OX=426428 GN=FOXG_04892 PE=3 SV=1	3	3	0.0073	339914	5.61
$375-1	tr|A0A0D2XMC8|A0A0D2XMC8_FUSO4 Uncharacterized protein OS=Fusarium oxysporum f. sp. lycopersici (strain 4287 / CBS 123668 / FGSC 9935 / NRRL 34936) OX=426428 PE=4 SV=1	3	3	0.0466	79612.1	9.26
$375-2	tr|A0A0J9UUG1|A0A0J9UUG1_FUSO4 Uncharacterized protein OS=Fusarium oxysporum f. sp. lycopersici (strain 4287 / CBS 123668 / FGSC 9935 / NRRL 34936) OX=426428 GN=FOXG_05105 PE=4 SV=1	3	3	0.0462	80297.9	9.26
$376-1	tr|A0A0D2XMD3|A0A0D2XMD3_FUSO4 Peroxiredoxin Q/BCP OS=Fusarium oxysporum f. sp. lycopersici (strain 4287 / CBS 123668 / FGSC 9935 / NRRL 34936) OX=426428 GN=FOXG_05110 PE=4 SV=1	3	3	0.0736	24902.3	8.86
$377-1	tr|A0A0D2XMR2|A0A0D2XMR2_FUSO4 TRP_N domain-containing protein OS=Fusarium oxysporum f. sp. lycopersici (strain 4287 / CBS 123668 / FGSC 9935 / NRRL 34936) OX=426428 GN=FOXG_05239 PE=3 SV=1	3	3	0.045	82534.6	9.38
$378-1	tr|A0A0D2XMW0|A0A0D2XMW0_FUSO4 Ketol-acid reductoisomerase, mitochondrial OS=Fusarium oxysporum f. sp. lycopersici (strain 4287 / CBS 123668 / FGSC 9935 / NRRL 34936) OX=426428 GN=FOXG_05288 PE=3 SV=1	3	3	0.0889	44923.2	8.7
$379-1	tr|A0A0D2XN99|A0A0D2XN99_FUSO4 CK1/CK1/CK1-G protein kinase OS=Fusarium oxysporum f. sp. lycopersici (strain 4287 / CBS 123668 / FGSC 9935 / NRRL 34936) OX=426428 GN=FOXG_05428 PE=3 SV=1	3	3	0.0728	50408.4	9.48
$380-1	tr|A0A0D2XNA0|A0A0D2XNA0_FUSO4 GOLD domain-containing protein OS=Fusarium oxysporum f. sp. lycopersici (strain 4287 / CBS 123668 / FGSC 9935 / NRRL 34936) OX=426428 GN=FOXG_05429 PE=3 SV=1	3	3	0.1142	24787.8	6.6
$381-1	tr|A0A0D2XNA9|A0A0D2XNA9_FUSO4 Eukaryotic translation initiation factor 3 subunit F OS=Fusarium oxysporum f. sp. lycopersici (strain 4287 / CBS 123668 / FGSC 9935 / NRRL 34936) OX=426428 GN=FOXG_05439 PE=3 SV=1	3	3	0.0754	38908.8	4.89
$382-1	tr|A0A0D2XNG7|A0A0D2XNG7_FUSO4 Mitochondrial import receptor subunit tom-70 OS=Fusarium oxysporum f. sp. lycopersici (strain 4287 / CBS 123668 / FGSC 9935 / NRRL 34936) OX=426428 GN=FOXG_05497 PE=4 SV=1	3	3	0.0484	68755.8	5.27
$383-1	tr|A0A0D2XNX2|A0A0D2XNX2_FUSO4 Uncharacterized protein OS=Fusarium oxysporum f. sp. lycopersici (strain 4287 / CBS 123668 / FGSC 9935 / NRRL 34936) OX=426428 PE=4 SV=1	3	3	0.3271	11414	7.9
$383-2	tr|A0A0J9WL27|A0A0J9WL27_FUSO4 Oxidoreductase OS=Fusarium oxysporum f. sp. lycopersici (strain 4287 / CBS 123668 / FGSC 9935 / NRRL 34936) OX=426428 GN=FOXG_05657 PE=4 SV=1	3	3	0.1122	34242.1	6.14
$384-1	tr|A0A0D2XP49|A0A0D2XP49_FUSO4 Uncharacterized protein OS=Fusarium oxysporum f. sp. lycopersici (strain 4287 / CBS 123668 / FGSC 9935 / NRRL 34936) OX=426428 GN=FOXG_05735 PE=4 SV=1	3	3	0.0814	34158	8.55
$385-1	tr|A0A0D2XQ76|A0A0D2XQ76_FUSO4 26S proteasome regulatory subunit N5 OS=Fusarium oxysporum f. sp. lycopersici (strain 4287 / CBS 123668 / FGSC 9935 / NRRL 34936) OX=426428 GN=FOXG_06118 PE=3 SV=1	3	3	0.0457	55485	6.51
$386-1	tr|A0A0D2XQD8|A0A0D2XQD8_FUSO4 UCR_hinge domain-containing protein OS=Fusarium oxysporum f. sp. lycopersici (strain 4287 / CBS 123668 / FGSC 9935 / NRRL 34936) OX=426428 GN=FOXG_06184 PE=3 SV=1	3	3	0.2137	14868.7	3.97
$387-1	tr|A0A0D2XUM4|A0A0D2XUM4_FUSO4 Nucleoside diphosphate kinase OS=Fusarium oxysporum f. sp. lycopersici (strain 4287 / CBS 123668 / FGSC 9935 / NRRL 34936) OX=426428 PE=3 SV=1	3	3	0.3117	16814	7.77
$388-1	tr|A0A0D2XUT9|A0A0D2XUT9_FUSO4 ATP citrate synthase OS=Fusarium oxysporum f. sp. lycopersici (strain 4287 / CBS 123668 / FGSC 9935 / NRRL 34936) OX=426428 GN=FOXG_07744 PE=4 SV=1	3	3	0.0519	71382.5	8.24
$389-1	tr|A0A0D2XV04|A0A0D2XV04_FUSO4 Uncharacterized protein OS=Fusarium oxysporum f. sp. lycopersici (strain 4287 / CBS 123668 / FGSC 9935 / NRRL 34936) OX=426428 GN=FOXG_07812 PE=4 SV=1	3	3	0.019	135518	5.32
$390-1	tr|A0A0D2XVL4|A0A0D2XVL4_FUSO4 Uncharacterized protein OS=Fusarium oxysporum f. sp. lycopersici (strain 4287 / CBS 123668 / FGSC 9935 / NRRL 34936) OX=426428 GN=FOXG_08026 PE=3 SV=1	3	3	0.1024	33027.6	4.95
$391-1	tr|A0A0D2XVP6|A0A0D2XVP6_FUSO4 T-complex protein 1 subunit eta OS=Fusarium oxysporum f. sp. lycopersici (strain 4287 / CBS 123668 / FGSC 9935 / NRRL 34936) OX=426428 GN=FOXG_08058 PE=3 SV=1	3	3	0.0504	60561.8	5.97
$392-1	tr|A0A0D2XVV5|A0A0D2XVV5_FUSO4 Uncharacterized protein OS=Fusarium oxysporum f. sp. lycopersici (strain 4287 / CBS 123668 / FGSC 9935 / NRRL 34936) OX=426428 GN=FOXG_08117 PE=4 SV=1	3	3	0.0161	170801	5.29
$393-1	tr|A0A0D2XWQ3|A0A0D2XWQ3_FUSO4 Probable kinetochore protein NUF2 OS=Fusarium oxysporum f. sp. lycopersici (strain 4287 / CBS 123668 / FGSC 9935 / NRRL 34936) OX=426428 GN=FOXG_08419 PE=3 SV=1	3	3	0.0281	54085.6	6.03
$394-1	tr|A0A0D2XWY8|A0A0D2XWY8_FUSO4 Protein kinase domain-containing protein OS=Fusarium oxysporum f. sp. lycopersici (strain 4287 / CBS 123668 / FGSC 9935 / NRRL 34936) OX=426428 PE=4 SV=1	3	3	0.0358	82635.9	9
$395-1	tr|A0A0D2XX16|A0A0D2XX16_FUSO4 Translocation protein SEC62 OS=Fusarium oxysporum f. sp. lycopersici (strain 4287 / CBS 123668 / FGSC 9935 / NRRL 34936) OX=426428 GN=FOXG_08532 PE=3 SV=1	3	3	0.0759	43398.4	9.49
$396-1	tr|A0A0D2XX29|A0A0D2XX29_FUSO4 Nucleolar GTP-binding protein 1 OS=Fusarium oxysporum f. sp. lycopersici (strain 4287 / CBS 123668 / FGSC 9935 / NRRL 34936) OX=426428 GN=FOXG_08545 PE=3 SV=1	3	3	0.0288	75492.4	9.08
$397-1	tr|A0A0D2XX83|A0A0D2XX83_FUSO4 Acetyl-CoA C-acetyltransferase OS=Fusarium oxysporum f. sp. lycopersici (strain 4287 / CBS 123668 / FGSC 9935 / NRRL 34936) OX=426428 GN=FOXG_08599 PE=3 SV=1	3	3	0.0628	45014.9	8.94
$398-1	tr|A0A0D2XXD6|A0A0D2XXD6_FUSO4 Pyridoxal 5'-phosphate synthase (glutamine hydrolyzing) OS=Fusarium oxysporum f. sp. lycopersici (strain 4287 / CBS 123668 / FGSC 9935 / NRRL 34936) OX=426428 GN=FOXG_08652 PE=3 SV=1	3	3	0.1125	32640.1	5.45
$399-1	tr|A0A0D2XXF3|A0A0D2XXF3_FUSO4 Uncharacterized protein OS=Fusarium oxysporum f. sp. lycopersici (strain 4287 / CBS 123668 / FGSC 9935 / NRRL 34936) OX=426428 GN=FOXG_08669 PE=4 SV=1	3	3	0.0256	97104.7	6.36
$400-1	tr|A0A0D2XXX4|A0A0D2XXX4_FUSO4 Eukaryotic translation initiation factor 3 subunit B OS=Fusarium oxysporum f. sp. lycopersici (strain 4287 / CBS 123668 / FGSC 9935 / NRRL 34936) OX=426428 GN=PRT1 PE=3 SV=1	3	3	0.0575	59307.3	5.46
$401-1	tr|A0A0D2XXX9|A0A0D2XXX9_FUSO4 SWIB/MDM2 domain-containing protein OS=Fusarium oxysporum f. sp. lycopersici (strain 4287 / CBS 123668 / FGSC 9935 / NRRL 34936) OX=426428 GN=FOXG_08848 PE=4 SV=1	3	3	0.1183	28832	8.71
$402-1	tr|A0A0D2XYY9|A0A0D2XYY9_FUSO4 Uncharacterized protein OS=Fusarium oxysporum f. sp. lycopersici (strain 4287 / CBS 123668 / FGSC 9935 / NRRL 34936) OX=426428 GN=FOXG_09211 PE=3 SV=1	3	3	0.0192	154670	5.79
$403-1	tr|A0A0D2XZ08|A0A0D2XZ08_FUSO4 Uncharacterized protein OS=Fusarium oxysporum f. sp. lycopersici (strain 4287 / CBS 123668 / FGSC 9935 / NRRL 34936) OX=426428 GN=FOXG_09230 PE=3 SV=1	3	3	0.0258	99915.1	8.94
$404-1	tr|A0A0D2XZ64|A0A0D2XZ64_FUSO4 Uncharacterized protein OS=Fusarium oxysporum f. sp. lycopersici (strain 4287 / CBS 123668 / FGSC 9935 / NRRL 34936) OX=426428 GN=FOXG_09288 PE=3 SV=1	3	3	0.1256	24309.5	9.25
$405-1	tr|A0A0D2XZ80|A0A0D2XZ80_FUSO4 Uncharacterized protein OS=Fusarium oxysporum f. sp. lycopersici (strain 4287 / CBS 123668 / FGSC 9935 / NRRL 34936) OX=426428 GN=FOXG_09304 PE=4 SV=1	3	3	0.0755	52701.1	6.75
$406-1	tr|A0A0D2XZD6|A0A0D2XZD6_FUSO4 Cell division control protein 48 OS=Fusarium oxysporum f. sp. lycopersici (strain 4287 / CBS 123668 / FGSC 9935 / NRRL 34936) OX=426428 GN=FOXG_09364 PE=4 SV=1	3	3	0.0414	90233.4	4.93
$406-2	tr|A0A0J9VC58|A0A0J9VC58_FUSO4 Cell division control protein 48 OS=Fusarium oxysporum f. sp. lycopersici (strain 4287 / CBS 123668 / FGSC 9935 / NRRL 34936) OX=426428 GN=FOXG_09364 PE=4 SV=1	3	3	0.0438	85352.9	4.83
$406-3	tr|A0A0J9WP71|A0A0J9WP71_FUSO4 Cell division control protein 48 OS=Fusarium oxysporum f. sp. lycopersici (strain 4287 / CBS 123668 / FGSC 9935 / NRRL 34936) OX=426428 GN=FOXG_09364 PE=4 SV=1	3	3	0.0449	83391.8	4.89
$406-4	tr|A0A0J9VBP5|A0A0J9VBP5_FUSO4 Cell division control protein 48 OS=Fusarium oxysporum f. sp. lycopersici (strain 4287 / CBS 123668 / FGSC 9935 / NRRL 34936) OX=426428 GN=FOXG_09364 PE=4 SV=1	3	3	0.0421	88750.9	4.9
$407-1	tr|A0A0D2Y128|A0A0D2Y128_FUSO4 Pyr_redox_2 domain-containing protein OS=Fusarium oxysporum f. sp. lycopersici (strain 4287 / CBS 123668 / FGSC 9935 / NRRL 34936) OX=426428 GN=FOXG_09969 PE=4 SV=1	3	3	0.0876	41848.2	8.56
$408-1	tr|A0A0D2Y200|A0A0D2Y200_FUSO4 ATP-dependent RNA helicase DBP9 OS=Fusarium oxysporum f. sp. lycopersici (strain 4287 / CBS 123668 / FGSC 9935 / NRRL 34936) OX=426428 GN=FOXG_10293 PE=4 SV=1	3	3	0.0635	68901.3	9.32
$409-1	tr|A0A0D2Y2Q9|A0A0D2Y2Q9_FUSO4 L-type lectin-like domain-containing protein OS=Fusarium oxysporum f. sp. lycopersici (strain 4287 / CBS 123668 / FGSC 9935 / NRRL 34936) OX=426428 GN=FOXG_10558 PE=4 SV=1	3	3	0.0757	48716	9.28
$410-1	tr|A0A0D2Y4H3|A0A0D2Y4H3_FUSO4 Dolichyl-phosphate-mannose--protein mannosyltransferase OS=Fusarium oxysporum f. sp. lycopersici (strain 4287 / CBS 123668 / FGSC 9935 / NRRL 34936) OX=426428 PE=3 SV=1	3	3	0.0649	55359	8.6
$411-1	tr|A0A0D2Y599|A0A0D2Y599_FUSO4 PKD_channel domain-containing protein OS=Fusarium oxysporum f. sp. lycopersici (strain 4287 / CBS 123668 / FGSC 9935 / NRRL 34936) OX=426428 GN=FOXG_11454 PE=4 SV=1	3	3	0.0405	78796.2	5
$412-1	tr|A0A0D2Y5A7|A0A0D2Y5A7_FUSO4 Acetyltransferase component of pyruvate dehydrogenase complex OS=Fusarium oxysporum f. sp. lycopersici (strain 4287 / CBS 123668 / FGSC 9935 / NRRL 34936) OX=426428 GN=FOXG_11462 PE=3 SV=1	3	3	0.0635	48773.8	6.24
$413-1	tr|A0A0D2Y5D0|A0A0D2Y5D0_FUSO4 50S ribosomal protein L34e OS=Fusarium oxysporum f. sp. lycopersici (strain 4287 / CBS 123668 / FGSC 9935 / NRRL 34936) OX=426428 GN=FOXG_11485 PE=3 SV=1	3	3	0.2155	13347.4	11.01
$414-1	tr|A0A0D2Y5F2|A0A0D2Y5F2_FUSO4 NADH dehydrogenase OS=Fusarium oxysporum f. sp. lycopersici (strain 4287 / CBS 123668 / FGSC 9935 / NRRL 34936) OX=426428 GN=FOXG_11507 PE=4 SV=1	3	3	0.0537	64157.9	9.37
$415-1	tr|A0A0D2Y5Q9|A0A0D2Y5Q9_FUSO4 Uncharacterized protein OS=Fusarium oxysporum f. sp. lycopersici (strain 4287 / CBS 123668 / FGSC 9935 / NRRL 34936) OX=426428 PE=4 SV=1	3	3	0.0126	124883	8.92
$415-2	tr|A0A0J9VLG7|A0A0J9VLG7_FUSO4 Uncharacterized protein OS=Fusarium oxysporum f. sp. lycopersici (strain 4287 / CBS 123668 / FGSC 9935 / NRRL 34936) OX=426428 GN=FOXG_11615 PE=4 SV=1	3	3	0.0124	126944	8.85
$416-1	tr|A0A0D2Y5S0|A0A0D2Y5S0_FUSO4 ATP-dependent rRNA helicase RRP3 OS=Fusarium oxysporum f. sp. lycopersici (strain 4287 / CBS 123668 / FGSC 9935 / NRRL 34936) OX=426428 GN=FOXG_11626 PE=3 SV=1	3	3	0.0536	53775.3	9.13
$417-1	tr|A0A0D2Y5S6|A0A0D2Y5S6_FUSO4 Amidase domain-containing protein OS=Fusarium oxysporum f. sp. lycopersici (strain 4287 / CBS 123668 / FGSC 9935 / NRRL 34936) OX=426428 GN=FOXG_11632 PE=4 SV=1	3	3	0.0547	63328.9	6.14
$418-1	tr|A0A0D2Y7V6|A0A0D2Y7V6_FUSO4 Ribonuclease T(2) OS=Fusarium oxysporum f. sp. lycopersici (strain 4287 / CBS 123668 / FGSC 9935 / NRRL 34936) OX=426428 GN=FOXG_12372 PE=3 SV=1	3	3	0.1255	29092.4	5.6
$419-1	tr|A0A0D2Y7Y8|A0A0D2Y7Y8_FUSO4 CCHC-type domain-containing protein OS=Fusarium oxysporum f. sp. lycopersici (strain 4287 / CBS 123668 / FGSC 9935 / NRRL 34936) OX=426428 PE=4 SV=1	3	3	0.0301	71837.2	8.48
$420-1	tr|A0A0D2Y968|A0A0D2Y968_FUSO4 Vesicular-fusion protein SEC18 OS=Fusarium oxysporum f. sp. lycopersici (strain 4287 / CBS 123668 / FGSC 9935 / NRRL 34936) OX=426428 GN=FOXG_12838 PE=3 SV=1	3	3	0.035	84450.4	6.47
$421-1	tr|A0A0D2Y9Y6|A0A0D2Y9Y6_FUSO4 Uncharacterized protein OS=Fusarium oxysporum f. sp. lycopersici (strain 4287 / CBS 123668 / FGSC 9935 / NRRL 34936) OX=426428 PE=4 SV=1	3	3	0.0647	26062.2	5.14
$421-2	tr|A0A0J9WSF6|A0A0J9WSF6_FUSO4 Zn(2)-C6 fungal-type domain-containing protein OS=Fusarium oxysporum f. sp. lycopersici (strain 4287 / CBS 123668 / FGSC 9935 / NRRL 34936) OX=426428 GN=FOXG_13107 PE=4 SV=1	3	3	0.0278	60394.2	8.6
$422-1	tr|A0A0D2YC04|A0A0D2YC04_FUSO4 Uncharacterized protein OS=Fusarium oxysporum f. sp. lycopersici (strain 4287 / CBS 123668 / FGSC 9935 / NRRL 34936) OX=426428 GN=FOXG_13834 PE=4 SV=1	3	3	0.0921	42927.3	9.31
$423-1	tr|A0A0D2YFW2|A0A0D2YFW2_FUSO4 Uncharacterized protein OS=Fusarium oxysporum f. sp. lycopersici (strain 4287 / CBS 123668 / FGSC 9935 / NRRL 34936) OX=426428 GN=FOXG_15200 PE=3 SV=1	3	3	0.0673	33321.3	5.81
$424-1	tr|A0A0D2YGI9|A0A0D2YGI9_FUSO4 Peroxidase OS=Fusarium oxysporum f. sp. lycopersici (strain 4287 / CBS 123668 / FGSC 9935 / NRRL 34936) OX=426428 GN=FOXG_15430 PE=3 SV=1	3	3	0.1718	25372.7	5.86
$425-1	tr|A0A0D2YH32|A0A0D2YH32_FUSO4 NADH-ubiquinone oxidoreductase 21 kDa subunit OS=Fusarium oxysporum f. sp. lycopersici (strain 4287 / CBS 123668 / FGSC 9935 / NRRL 34936) OX=426428 GN=FOXG_15623 PE=4 SV=1	3	3	0.1596	20853.4	9.22
$426-1	tr|A0A0D2YH41|A0A0D2YH41_FUSO4 DnaJ like subfamily C member 2 OS=Fusarium oxysporum f. sp. lycopersici (strain 4287 / CBS 123668 / FGSC 9935 / NRRL 34936) OX=426428 GN=FOXG_15632 PE=4 SV=1	3	3	0.0833	50419.9	8.93
$427-1	tr|A0A0D2YH52|A0A0D2YH52_FUSO4 Endoplasmic reticulum junction formation protein lunapark OS=Fusarium oxysporum f. sp. lycopersici (strain 4287 / CBS 123668 / FGSC 9935 / NRRL 34936) OX=426428 GN=FOXG_15644 PE=3 SV=1	3	3	0.067	40601.4	7.6
$428-1	tr|A0A0D2YJ75|A0A0D2YJ75_FUSO4 Sulfatase domain-containing protein OS=Fusarium oxysporum f. sp. lycopersici (strain 4287 / CBS 123668 / FGSC 9935 / NRRL 34936) OX=426428 GN=FOXG_16589 PE=4 SV=1	3	3	0.0309	98482.4	5.61
$429-1	tr|A0A0J9U961|A0A0J9U961_FUSO4 LsmAD domain-containing protein OS=Fusarium oxysporum f. sp. lycopersici (strain 4287 / CBS 123668 / FGSC 9935 / NRRL 34936) OX=426428 GN=FOXG_00960 PE=4 SV=1	3	3	0.0552	91822.1	9.64
$429-2	tr|A0A0D2XAP4|A0A0D2XAP4_FUSO4 LsmAD domain-containing protein OS=Fusarium oxysporum f. sp. lycopersici (strain 4287 / CBS 123668 / FGSC 9935 / NRRL 34936) OX=426428 GN=FOXG_00960 PE=4 SV=1	3	3	0.0513	98495.1	9.63
$430-1	tr|A0A0J9UA44|A0A0J9UA44_FUSO4 SANT domain-containing protein OS=Fusarium oxysporum f. sp. lycopersici (strain 4287 / CBS 123668 / FGSC 9935 / NRRL 34936) OX=426428 GN=FOXG_00743 PE=4 SV=1	3	3	0.0131	227894	7.94
$431-1	tr|A0A0J9UDE9|A0A0J9UDE9_FUSO4 Diadenosine tetraphosphate synthetase OS=Fusarium oxysporum f. sp. lycopersici (strain 4287 / CBS 123668 / FGSC 9935 / NRRL 34936) OX=426428 GN=FOXG_01857 PE=3 SV=1	3	3	0.0458	83181.8	8.36
$431-2	tr|A0A0D2XD82|A0A0D2XD82_FUSO4 Diadenosine tetraphosphate synthetase OS=Fusarium oxysporum f. sp. lycopersici (strain 4287 / CBS 123668 / FGSC 9935 / NRRL 34936) OX=426428 PE=3 SV=1	3	3	0.0513	74337.5	5.8
$432-1	tr|A0A0J9UF94|A0A0J9UF94_FUSO4 RNB domain-containing protein OS=Fusarium oxysporum f. sp. lycopersici (strain 4287 / CBS 123668 / FGSC 9935 / NRRL 34936) OX=426428 GN=FOXG_01798 PE=4 SV=1	3	3	0.0213	149850	6.5
$432-2	tr|A0A0D2XD23|A0A0D2XD23_FUSO4 RNB domain-containing protein OS=Fusarium oxysporum f. sp. lycopersici (strain 4287 / CBS 123668 / FGSC 9935 / NRRL 34936) OX=426428 PE=4 SV=1	3	3	0.0217	147432	6.5
$433-1	tr|A0A0J9UHC0|A0A0J9UHC0_FUSO4 GMP synthase [glutamine-hydrolyzing] OS=Fusarium oxysporum f. sp. lycopersici (strain 4287 / CBS 123668 / FGSC 9935 / NRRL 34936) OX=426428 GN=FOXG_03059 PE=3 SV=1	3	3	0.0588	59843.8	5.56
$433-2	tr|A0A0J9UI32|A0A0J9UI32_FUSO4 GMP synthase [glutamine-hydrolyzing] OS=Fusarium oxysporum f. sp. lycopersici (strain 4287 / CBS 123668 / FGSC 9935 / NRRL 34936) OX=426428 GN=FOXG_03059 PE=4 SV=1	3	3	0.0637	55250.7	5.58
$433-3	tr|A0A0D2XGL6|A0A0D2XGL6_FUSO4 GMP synthetase OS=Fusarium oxysporum f. sp. lycopersici (strain 4287 / CBS 123668 / FGSC 9935 / NRRL 34936) OX=426428 PE=4 SV=1	3	3	0.0671	52776.8	5.84
$434-1	tr|A0A0J9UHG2|A0A0J9UHG2_FUSO4 RNA-dependent RNA polymerase OS=Fusarium oxysporum f. sp. lycopersici (strain 4287 / CBS 123668 / FGSC 9935 / NRRL 34936) OX=426428 GN=FOXG_03081 PE=3 SV=1	3	3	0.0175	155922	6.28
$435-1	tr|A0A0J9UL15|A0A0J9UL15_FUSO4 Non-specific serine/threonine protein kinase OS=Fusarium oxysporum f. sp. lycopersici (strain 4287 / CBS 123668 / FGSC 9935 / NRRL 34936) OX=426428 GN=FOXG_03065 PE=3 SV=1	3	3	0.0728	42212.7	9.47
$435-2	tr|A0A0D2XGM2|A0A0D2XGM2_FUSO4 Non-specific serine/threonine protein kinase OS=Fusarium oxysporum f. sp. lycopersici (strain 4287 / CBS 123668 / FGSC 9935 / NRRL 34936) OX=426428 GN=FOXG_03065 PE=3 SV=1	3	3	0.0694	44050.8	9.6
$435-3	tr|A0A0J9WIN3|A0A0J9WIN3_FUSO4 Non-specific serine/threonine protein kinase OS=Fusarium oxysporum f. sp. lycopersici (strain 4287 / CBS 123668 / FGSC 9935 / NRRL 34936) OX=426428 GN=FOXG_03065 PE=3 SV=1	3	3	0.0724	42407.9	9.52
$436-1	tr|A0A0J9UMP4|A0A0J9UMP4_FUSO4 Uncharacterized protein OS=Fusarium oxysporum f. sp. lycopersici (strain 4287 / CBS 123668 / FGSC 9935 / NRRL 34936) OX=426428 GN=FOXG_04189 PE=4 SV=1	3	3	0.0938	27866.6	5.24
$436-2	tr|A0A0J9WJR2|A0A0J9WJR2_FUSO4 BAR domain-containing protein OS=Fusarium oxysporum f. sp. lycopersici (strain 4287 / CBS 123668 / FGSC 9935 / NRRL 34936) OX=426428 GN=FOXG_04189 PE=4 SV=1	3	3	0.0748	35199.7	5.37
$436-3	tr|A0A0D2XJS4|A0A0D2XJS4_FUSO4 BAR domain-containing protein OS=Fusarium oxysporum f. sp. lycopersici (strain 4287 / CBS 123668 / FGSC 9935 / NRRL 34936) OX=426428 GN=FOXG_04189 PE=4 SV=1	3	3	0.0738	35691.2	5.3
$436-4	tr|A0A0J9UP91|A0A0J9UP91_FUSO4 Uncharacterized protein OS=Fusarium oxysporum f. sp. lycopersici (strain 4287 / CBS 123668 / FGSC 9935 / NRRL 34936) OX=426428 GN=FOXG_04189 PE=4 SV=1	3	3	0.0923	28358.1	5.18
$437-1	tr|A0A0J9UNC2|A0A0J9UNC2_FUSO4 Uncharacterized protein OS=Fusarium oxysporum f. sp. lycopersici (strain 4287 / CBS 123668 / FGSC 9935 / NRRL 34936) OX=426428 GN=FOXG_04188 PE=3 SV=1	3	3	0.0972	28181.4	5.44
$438-1	tr|A0A0J9UWE1|A0A0J9UWE1_FUSO4 AMPK1_CBM domain-containing protein OS=Fusarium oxysporum f. sp. lycopersici (strain 4287 / CBS 123668 / FGSC 9935 / NRRL 34936) OX=426428 GN=FOXG_05538 PE=4 SV=1	3	3	0.056	70883.7	4.49
$438-2	tr|A0A0D2XNK7|A0A0D2XNK7_FUSO4 Uncharacterized protein OS=Fusarium oxysporum f. sp. lycopersici (strain 4287 / CBS 123668 / FGSC 9935 / NRRL 34936) OX=426428 GN=FOXG_05538 PE=4 SV=1	3	3	0.0645	60847.7	4.5
$438-3	tr|A0A0J9UUG4|A0A0J9UUG4_FUSO4 AMPK1_CBM domain-containing protein OS=Fusarium oxysporum f. sp. lycopersici (strain 4287 / CBS 123668 / FGSC 9935 / NRRL 34936) OX=426428 GN=FOXG_05538 PE=4 SV=1	3	3	0.0547	72601.5	4.48
$438-4	tr|A0A0J9UTJ5|A0A0J9UTJ5_FUSO4 Uncharacterized protein OS=Fusarium oxysporum f. sp. lycopersici (strain 4287 / CBS 123668 / FGSC 9935 / NRRL 34936) OX=426428 GN=FOXG_05538 PE=4 SV=1	3	3	0.0664	59129.9	4.51
$439-1	tr|A0A0J9UZ30|A0A0J9UZ30_FUSO4 ATP-dependent DNA helicase 2 subunit 1 OS=Fusarium oxysporum f. sp. lycopersici (strain 4287 / CBS 123668 / FGSC 9935 / NRRL 34936) OX=426428 GN=FOXG_06387 PE=4 SV=1	3	3	0.0203	122167	9.16
$439-2	tr|A0A0D2XQY6|A0A0D2XQY6_FUSO4 Zn(2)-C6 fungal-type domain-containing protein OS=Fusarium oxysporum f. sp. lycopersici (strain 4287 / CBS 123668 / FGSC 9935 / NRRL 34936) OX=426428 PE=4 SV=1	3	3	0.0278	89018.2	6.14
$440-1	tr|A0A0J9V2N3|A0A0J9V2N3_FUSO4 Leucyl-tRNA synthetase OS=Fusarium oxysporum f. sp. lycopersici (strain 4287 / CBS 123668 / FGSC 9935 / NRRL 34936) OX=426428 GN=FOXG_07715 PE=4 SV=1	3	3	0.0152	125896	6.07
$440-2	tr|A0A0D2XUR0|A0A0D2XUR0_FUSO4 Leucyl-tRNA synthetase OS=Fusarium oxysporum f. sp. lycopersici (strain 4287 / CBS 123668 / FGSC 9935 / NRRL 34936) OX=426428 PE=3 SV=1	3	3	0.0159	120269	6.13
$441-1	tr|A0A0J9V2R6|A0A0J9V2R6_FUSO4 Fungal_trans domain-containing protein OS=Fusarium oxysporum f. sp. lycopersici (strain 4287 / CBS 123668 / FGSC 9935 / NRRL 34936) OX=426428 GN=FOXG_07488 PE=4 SV=1	3	3	0.0328	81629.7	5.65
$442-1	tr|A0A0J9V3X2|A0A0J9V3X2_FUSO4 Transformation/transcription domain-associated protein OS=Fusarium oxysporum f. sp. lycopersici (strain 4287 / CBS 123668 / FGSC 9935 / NRRL 34936) OX=426428 GN=FOXG_07799 PE=4 SV=1	3	3	0.0053	369282	7.67
$442-2	tr|A0A0J9V2N1|A0A0J9V2N1_FUSO4 Transformation/transcription domain-associated protein OS=Fusarium oxysporum f. sp. lycopersici (strain 4287 / CBS 123668 / FGSC 9935 / NRRL 34936) OX=426428 GN=FOXG_07799 PE=4 SV=1	3	3	0.0052	371228	7.83
$443-1	tr|A0A0J9VAP5|A0A0J9VAP5_FUSO4 CULLIN_2 domain-containing protein OS=Fusarium oxysporum f. sp. lycopersici (strain 4287 / CBS 123668 / FGSC 9935 / NRRL 34936) OX=426428 GN=FOXG_09372 PE=3 SV=1	3	3	0.0175	71979.7	7.91
$443-2	tr|A0A0D2XZE4|A0A0D2XZE4_FUSO4 CULLIN_2 domain-containing protein OS=Fusarium oxysporum f. sp. lycopersici (strain 4287 / CBS 123668 / FGSC 9935 / NRRL 34936) OX=426428 PE=3 SV=1	3	3	0.0138	90833.1	8.7
$443-3	tr|A0A0J9VBQ9|A0A0J9VBQ9_FUSO4 CULLIN_2 domain-containing protein OS=Fusarium oxysporum f. sp. lycopersici (strain 4287 / CBS 123668 / FGSC 9935 / NRRL 34936) OX=426428 GN=FOXG_09372 PE=3 SV=1	3	3	0.0132	94794.5	8.96
$444-1	tr|A0A0J9VCH7|A0A0J9VCH7_FUSO4 Clustered mitochondria protein homolog OS=Fusarium oxysporum f. sp. lycopersici (strain 4287 / CBS 123668 / FGSC 9935 / NRRL 34936) OX=426428 GN=CLU1 PE=3 SV=1	3	3	0.0309	139786	5.13
$444-2	tr|A0A0D2XZT7|A0A0D2XZT7_FUSO4 Clustered mitochondria protein homolog OS=Fusarium oxysporum f. sp. lycopersici (strain 4287 / CBS 123668 / FGSC 9935 / NRRL 34936) OX=426428 GN=CLU1 PE=3 SV=1	3	3	0.0308	140153	5.13
$444-3	tr|A0A0J9VBI1|A0A0J9VBI1_FUSO4 Clustered mitochondria protein homolog OS=Fusarium oxysporum f. sp. lycopersici (strain 4287 / CBS 123668 / FGSC 9935 / NRRL 34936) OX=426428 GN=CLU1 PE=3 SV=1	3	3	0.0314	137562	5.21
$445-1	tr|A0A0J9VGJ2|A0A0J9VGJ2_FUSO4 ATG16 domain-containing protein OS=Fusarium oxysporum f. sp. lycopersici (strain 4287 / CBS 123668 / FGSC 9935 / NRRL 34936) OX=426428 GN=FOXG_10482 PE=3 SV=1	3	3	0.1273	18745.1	9.01
$445-2	tr|A0A0D2Y2I5|A0A0D2Y2I5_FUSO4 ATG16 domain-containing protein OS=Fusarium oxysporum f. sp. lycopersici (strain 4287 / CBS 123668 / FGSC 9935 / NRRL 34936) OX=426428 GN=FOXG_10482 PE=3 SV=1	3	3	0.1061	22613.4	5.73
$445-3	tr|A0A0J9WQ43|A0A0J9WQ43_FUSO4 ATG16 domain-containing protein OS=Fusarium oxysporum f. sp. lycopersici (strain 4287 / CBS 123668 / FGSC 9935 / NRRL 34936) OX=426428 GN=FOXG_10482 PE=3 SV=1	3	3	0.1257	19063.5	6.67
$446-1	tr|A0A0J9VGV6|A0A0J9VGV6_FUSO4 Uncharacterized protein OS=Fusarium oxysporum f. sp. lycopersici (strain 4287 / CBS 123668 / FGSC 9935 / NRRL 34936) OX=426428 GN=FOXG_10670 PE=4 SV=1	3	3	0.0182	117557	6.49
$447-1	tr|A0A0J9VIS4|A0A0J9VIS4_FUSO4 Ankyrin repeat protein nuc-2 OS=Fusarium oxysporum f. sp. lycopersici (strain 4287 / CBS 123668 / FGSC 9935 / NRRL 34936) OX=426428 GN=FOXG_11168 PE=4 SV=1	3	3	0.0409	111157	5.75
$447-2	tr|A0A0D2Y4G5|A0A0D2Y4G5_FUSO4 Uncharacterized protein OS=Fusarium oxysporum f. sp. lycopersici (strain 4287 / CBS 123668 / FGSC 9935 / NRRL 34936) OX=426428 PE=4 SV=1	3	3	0.04	113850	6.01
$448-1	tr|A0A0J9VIX7|A0A0J9VIX7_FUSO4 Carboxylic ester hydrolase OS=Fusarium oxysporum f. sp. lycopersici (strain 4287 / CBS 123668 / FGSC 9935 / NRRL 34936) OX=426428 GN=FOXG_10855 PE=3 SV=1	3	3	0.0865	59184.5	8.95
$449-1	tr|A0A0J9VK23|A0A0J9VK23_FUSO4 Dolichyl-phosphate-mannose--protein mannosyltransferase OS=Fusarium oxysporum f. sp. lycopersici (strain 4287 / CBS 123668 / FGSC 9935 / NRRL 34936) OX=426428 GN=FOXG_11176 PE=3 SV=1	3	3	0.049	81129.5	8.19
$450-1	tr|A0A0J9W3I0|A0A0J9W3I0_FUSO4 26S proteasome regulatory subunit RPN2 OS=Fusarium oxysporum f. sp. lycopersici (strain 4287 / CBS 123668 / FGSC 9935 / NRRL 34936) OX=426428 GN=FOXG_15464 PE=3 SV=1	3	3	0.0309	131073	5
$450-2	tr|A0A0D2YGM3|A0A0D2YGM3_FUSO4 26S proteasome regulatory subunit RPN2 OS=Fusarium oxysporum f. sp. lycopersici (strain 4287 / CBS 123668 / FGSC 9935 / NRRL 34936) OX=426428 PE=3 SV=1	3	3	0.0321	126160	4.92
$451-1	tr|A0A0J9W748|A0A0J9W748_FUSO4 Uncharacterized protein OS=Fusarium oxysporum f. sp. lycopersici (strain 4287 / CBS 123668 / FGSC 9935 / NRRL 34936) OX=426428 GN=FOXG_16109 PE=4 SV=1	3	3	0.1139	30453.3	6.35
$452-1	tr|A0A0J9WGK8|A0A0J9WGK8_FUSO4 Transcription elongation factor S-II OS=Fusarium oxysporum f. sp. lycopersici (strain 4287 / CBS 123668 / FGSC 9935 / NRRL 34936) OX=426428 GN=FOXG_00882 PE=4 SV=1	3	3	0.0877	34033.5	9.41
$452-2	tr|A0A0D2XAG7|A0A0D2XAG7_FUSO4 Uncharacterized protein OS=Fusarium oxysporum f. sp. lycopersici (strain 4287 / CBS 123668 / FGSC 9935 / NRRL 34936) OX=426428 PE=4 SV=1	3	3	0.0836	35592.2	9.35
$453-1	tr|A0A0J9WLE4|A0A0J9WLE4_FUSO4 Squalene synthase OS=Fusarium oxysporum f. sp. lycopersici (strain 4287 / CBS 123668 / FGSC 9935 / NRRL 34936) OX=426428 GN=FOXG_06061 PE=3 SV=1	3	3	0.0619	50550.9	5.5
$454-1	tr|A0A0J9WQ29|A0A0J9WQ29_FUSO4 Ribosome biogenesis protein NOP53 OS=Fusarium oxysporum f. sp. lycopersici (strain 4287 / CBS 123668 / FGSC 9935 / NRRL 34936) OX=426428 GN=FOXG_10438 PE=3 SV=1	3	3	0.0683	50803	9.46
$454-2	tr|A0A0D2Y2E2|A0A0D2Y2E2_FUSO4 Ribosome biogenesis protein NOP53 OS=Fusarium oxysporum f. sp. lycopersici (strain 4287 / CBS 123668 / FGSC 9935 / NRRL 34936) OX=426428 PE=3 SV=1	3	3	0.0625	55484.3	9.32
$455-1	tr|A0A0J9WRU7|A0A0J9WRU7_FUSO4 Ribose-phosphate pyrophosphokinase OS=Fusarium oxysporum f. sp. lycopersici (strain 4287 / CBS 123668 / FGSC 9935 / NRRL 34936) OX=426428 GN=FOXG_12773 PE=3 SV=1	3	3	0.0716	49766.6	8.33
$455-2	tr|A0A0D2Y905|A0A0D2Y905_FUSO4 Ribose-phosphate pyrophosphokinase OS=Fusarium oxysporum f. sp. lycopersici (strain 4287 / CBS 123668 / FGSC 9935 / NRRL 34936) OX=426428 GN=FOXG_12773 PE=3 SV=1	3	3	0.0747	47729.3	8.57
$456-1	tr|A0A0C4DHQ5|A0A0C4DHQ5_FUSO4 Nitrite reductase OS=Fusarium oxysporum f. sp. lycopersici (strain 4287 / CBS 123668 / FGSC 9935 / NRRL 34936) OX=426428 GN=FOXG_03192 PE=3 SV=1	9	2	0.0119	118882	6.39
$457-1	tr|A0A0D2XZV0|A0A0D2XZV0_FUSO4 60S ribosomal protein L29 OS=Fusarium oxysporum f. sp. lycopersici (strain 4287 / CBS 123668 / FGSC 9935 / NRRL 34936) OX=426428 GN=FOXG_09533 PE=3 SV=1	9	2	0.1692	7489.5	11.42
$458-1	tr|A0A0D2Y508|A0A0D2Y508_FUSO4 Transcription initiation factor IIF subunit alpha OS=Fusarium oxysporum f. sp. lycopersici (strain 4287 / CBS 123668 / FGSC 9935 / NRRL 34936) OX=426428 GN=FOXG_11362 PE=3 SV=1	9	2	0.018	73584	8.94
$458-2	tr|A0A0J9VL66|A0A0J9VL66_FUSO4 Transcription initiation factor IIF subunit alpha OS=Fusarium oxysporum f. sp. lycopersici (strain 4287 / CBS 123668 / FGSC 9935 / NRRL 34936) OX=426428 GN=FOXG_11362 PE=3 SV=1	9	2	0.02	66406.9	8.75
$459-1	tr|A0A0D2Y796|A0A0D2Y796_FUSO4 Oxidoreductase OS=Fusarium oxysporum f. sp. lycopersici (strain 4287 / CBS 123668 / FGSC 9935 / NRRL 34936) OX=426428 GN=FOXG_12158 PE=4 SV=1	9	2	0.0271	37621.4	6.48
$460-1	tr|A0A0J9U484|A0A0J9U484_FUSO4 RING-type domain-containing protein OS=Fusarium oxysporum f. sp. lycopersici (strain 4287 / CBS 123668 / FGSC 9935 / NRRL 34936) OX=426428 GN=FOXG_00128 PE=4 SV=1	9	2	0.0152	84101.2	5.26
$460-2	tr|A0A0D2X8B9|A0A0D2X8B9_FUSO4 RING-type domain-containing protein OS=Fusarium oxysporum f. sp. lycopersici (strain 4287 / CBS 123668 / FGSC 9935 / NRRL 34936) OX=426428 PE=4 SV=1	9	2	0.0153	83409.4	5.26
$461-1	tr|A0A0D2X9Q0|A0A0D2X9Q0_FUSO4 Uncharacterized protein OS=Fusarium oxysporum f. sp. lycopersici (strain 4287 / CBS 123668 / FGSC 9935 / NRRL 34936) OX=426428 GN=FOXG_00615 PE=3 SV=1	6	2	0.0094	127683	4.82
$462-1	tr|A0A0D2XCJ6|A0A0D2XCJ6_FUSO4 40S ribosomal protein S29 OS=Fusarium oxysporum f. sp. lycopersici (strain 4287 / CBS 123668 / FGSC 9935 / NRRL 34936) OX=426428 GN=FOXG_01619 PE=3 SV=1	6	2	0.1429	6692.69	10.2
$463-1	tr|A0A0D2XHT6|A0A0D2XHT6_FUSO4 Leukotriene A-4 hydrolase homolog OS=Fusarium oxysporum f. sp. lycopersici (strain 4287 / CBS 123668 / FGSC 9935 / NRRL 34936) OX=426428 GN=FOXG_03484 PE=3 SV=1	6	2	0.0128	113897	5.56
$464-1	tr|A0A0D2XWY3|A0A0D2XWY3_FUSO4 Uncharacterized protein OS=Fusarium oxysporum f. sp. lycopersici (strain 4287 / CBS 123668 / FGSC 9935 / NRRL 34936) OX=426428 GN=FOXG_08499 PE=4 SV=1	6	2	0.0173	83054.7	5.93
$465-1	tr|A0A0D2YAC2|A0A0D2YAC2_FUSO4 Uncharacterized protein OS=Fusarium oxysporum f. sp. lycopersici (strain 4287 / CBS 123668 / FGSC 9935 / NRRL 34936) OX=426428 GN=FOXG_13246 PE=4 SV=1	6	2	0.0615	27907.7	7.07
$466-1	tr|A0A0D2X849|A0A0D2X849_FUSO4 Adenylyl-sulfate kinase OS=Fusarium oxysporum f. sp. lycopersici (strain 4287 / CBS 123668 / FGSC 9935 / NRRL 34936) OX=426428 GN=FOXG_00055 PE=3 SV=1	5	2	0.0531	23153.7	5.8
$467-1	tr|A0A0D2X8M6|A0A0D2X8M6_FUSO4 Uncharacterized protein OS=Fusarium oxysporum f. sp. lycopersici (strain 4287 / CBS 123668 / FGSC 9935 / NRRL 34936) OX=426428 GN=FOXG_00235 PE=4 SV=1	5	2	0.0095	129913	5.37
$468-1	tr|A0A0D2XE33|A0A0D2XE33_FUSO4 Probable lysosomal cobalamin transporter OS=Fusarium oxysporum f. sp. lycopersici (strain 4287 / CBS 123668 / FGSC 9935 / NRRL 34936) OX=426428 PE=3 SV=1	5	2	0.0375	59714.4	8.91
$468-2	tr|A0A0J9UEF2|A0A0J9UEF2_FUSO4 Probable lysosomal cobalamin transporter OS=Fusarium oxysporum f. sp. lycopersici (strain 4287 / CBS 123668 / FGSC 9935 / NRRL 34936) OX=426428 GN=FOXG_02164 PE=3 SV=1	5	2	0.0286	78496.4	8.77
$469-1	tr|A0A0D2XM81|A0A0D2XM81_FUSO4 Uncharacterized protein OS=Fusarium oxysporum f. sp. lycopersici (strain 4287 / CBS 123668 / FGSC 9935 / NRRL 34936) OX=426428 GN=FOXG_05057 PE=3 SV=1	5	2	0.0241	77134.4	5.38
$469-2	tr|A0A0J9UR11|A0A0J9UR11_FUSO4 Uncharacterized protein OS=Fusarium oxysporum f. sp. lycopersici (strain 4287 / CBS 123668 / FGSC 9935 / NRRL 34936) OX=426428 GN=FOXG_05057 PE=3 SV=1	5	2	0.0245	76125.3	5.28
$470-1	tr|A0A0J9USE2|A0A0J9USE2_FUSO4 Uncharacterized protein OS=Fusarium oxysporum f. sp. lycopersici (strain 4287 / CBS 123668 / FGSC 9935 / NRRL 34936) OX=426428 GN=FOXG_04994 PE=4 SV=1	5	2	0.0566	37045.3	9.86
$471-1	tr|A0A0J9WJP2|A0A0J9WJP2_FUSO4 Uncharacterized protein OS=Fusarium oxysporum f. sp. lycopersici (strain 4287 / CBS 123668 / FGSC 9935 / NRRL 34936) OX=426428 GN=FOXG_04142 PE=4 SV=1	5	2	0.0105	138311	8.01
$471-2	tr|A0A0D2XJN2|A0A0D2XJN2_FUSO4 Uncharacterized protein OS=Fusarium oxysporum f. sp. lycopersici (strain 4287 / CBS 123668 / FGSC 9935 / NRRL 34936) OX=426428 PE=4 SV=1	5	2	0.0132	109026	7.09
$472-1	tr|A0A0J9WW77|A0A0J9WW77_FUSO4 Uncharacterized protein OS=Fusarium oxysporum f. sp. lycopersici (strain 4287 / CBS 123668 / FGSC 9935 / NRRL 34936) OX=426428 GN=FOXG_22940 PE=3 SV=1	5	2	0.0056	237797	5.56
$473-1	tr|A0A0C4DHV0|A0A0C4DHV0_FUSO4 Guanine nucleotide-binding protein alpha subunit OS=Fusarium oxysporum f. sp. lycopersici (strain 4287 / CBS 123668 / FGSC 9935 / NRRL 34936) OX=426428 GN=FOXG_09359 PE=3 SV=1	4	2	0.0623	41023.4	5.12
$474-1	tr|A0A0D2XAC2|A0A0D2XAC2_FUSO4 ATP-dependent RNA helicase ROK1 OS=Fusarium oxysporum f. sp. lycopersici (strain 4287 / CBS 123668 / FGSC 9935 / NRRL 34936) OX=426428 GN=FOXG_00837 PE=3 SV=1	4	2	0.0245	76084.4	8.81
$475-1	tr|A0A0D2XHG1|A0A0D2XHG1_FUSO4 Uncharacterized protein OS=Fusarium oxysporum f. sp. lycopersici (strain 4287 / CBS 123668 / FGSC 9935 / NRRL 34936) OX=426428 GN=FOXG_03359 PE=4 SV=1	4	2	0.0281	81705.2	8.3
$476-1	tr|A0A0D2XJT1|A0A0D2XJT1_FUSO4 GPI ethanolamine phosphate transferase 1 OS=Fusarium oxysporum f. sp. lycopersici (strain 4287 / CBS 123668 / FGSC 9935 / NRRL 34936) OX=426428 GN=FOXG_04197 PE=3 SV=1	4	2	0.0122	108546	5.97
$477-1	tr|A0A0D2XQI1|A0A0D2XQI1_FUSO4 Uncharacterized protein OS=Fusarium oxysporum f. sp. lycopersici (strain 4287 / CBS 123668 / FGSC 9935 / NRRL 34936) OX=426428 PE=3 SV=1	4	2	0.0885	28451.6	9.84
$477-2	tr|A0A0J9UX04|A0A0J9UX04_FUSO4 Uncharacterized protein OS=Fusarium oxysporum f. sp. lycopersici (strain 4287 / CBS 123668 / FGSC 9935 / NRRL 34936) OX=426428 GN=FOXG_06229 PE=3 SV=1	4	2	0.0875	28725	9.84
$478-1	tr|A0A0D2XR21|A0A0D2XR21_FUSO4 Fungal_trans domain-containing protein OS=Fusarium oxysporum f. sp. lycopersici (strain 4287 / CBS 123668 / FGSC 9935 / NRRL 34936) OX=426428 PE=4 SV=1	4	2	0.0238	94540.5	5.12
$478-2	tr|A0A0J9UY66|A0A0J9UY66_FUSO4 Zn(2)-C6 fungal-type domain-containing protein OS=Fusarium oxysporum f. sp. lycopersici (strain 4287 / CBS 123668 / FGSC 9935 / NRRL 34936) OX=426428 GN=FOXG_06423 PE=4 SV=1	4	2	0.0218	102710	5.48
$479-1	tr|A0A0D2XWT9|A0A0D2XWT9_FUSO4 Cytochrome b-c1 complex subunit Rieske, mitochondrial OS=Fusarium oxysporum f. sp. lycopersici (strain 4287 / CBS 123668 / FGSC 9935 / NRRL 34936) OX=426428 GN=FOXG_08455 PE=3 SV=1	4	2	0.0809	25155.4	8.22
$480-1	tr|A0A0D2XZP7|A0A0D2XZP7_FUSO4 Uncharacterized protein OS=Fusarium oxysporum f. sp. lycopersici (strain 4287 / CBS 123668 / FGSC 9935 / NRRL 34936) OX=426428 PE=4 SV=1	4	2	0.0159	86612.8	9.71
$480-2	tr|A0A0J9VCT1|A0A0J9VCT1_FUSO4 Uncharacterized protein OS=Fusarium oxysporum f. sp. lycopersici (strain 4287 / CBS 123668 / FGSC 9935 / NRRL 34936) OX=426428 GN=FOXG_09478 PE=4 SV=1	4	2	0.0161	85477.5	9.63
$481-1	tr|A0A0D2Y4T8|A0A0D2Y4T8_FUSO4 Citrate synthase OS=Fusarium oxysporum f. sp. lycopersici (strain 4287 / CBS 123668 / FGSC 9935 / NRRL 34936) OX=426428 GN=FOXG_11291 PE=3 SV=1	4	2	0.0298	51893.8	8.18
$482-1	tr|A0A0D2Y5N9|A0A0D2Y5N9_FUSO4 Uncharacterized protein OS=Fusarium oxysporum f. sp. lycopersici (strain 4287 / CBS 123668 / FGSC 9935 / NRRL 34936) OX=426428 GN=FOXG_11595 PE=4 SV=1	4	2	0.2647	7221.22	10.05
$483-1	tr|A0A0D2Y8U8|A0A0D2Y8U8_FUSO4 Uncharacterized protein OS=Fusarium oxysporum f. sp. lycopersici (strain 4287 / CBS 123668 / FGSC 9935 / NRRL 34936) OX=426428 GN=FOXG_12716 PE=4 SV=1	4	2	0.1818	11778.7	8.96
$484-1	tr|A0A0D2YAU6|A0A0D2YAU6_FUSO4 Uncharacterized protein OS=Fusarium oxysporum f. sp. lycopersici (strain 4287 / CBS 123668 / FGSC 9935 / NRRL 34936) OX=426428 GN=FOXG_13424 PE=3 SV=1	4	2	0.027	58744.6	6.58
$485-1	tr|A0A0D2YJH8|A0A0D2YJH8_FUSO4 Uncharacterized protein OS=Fusarium oxysporum f. sp. lycopersici (strain 4287 / CBS 123668 / FGSC 9935 / NRRL 34936) OX=426428 PE=4 SV=1	4	2	0.0333	45393.5	5.63
$485-2	tr|A0A0D2YJP3|A0A0D2YJP3_FUSO4 Dimer_Tnp_hAT domain-containing protein OS=Fusarium oxysporum f. sp. lycopersici (strain 4287 / CBS 123668 / FGSC 9935 / NRRL 34936) OX=426428 PE=4 SV=1	4	2	0.0261	57499.1	6.23
$485-3	tr|A0A0J9W8D8|A0A0J9W8D8_FUSO4 Dimer_Tnp_hAT domain-containing protein OS=Fusarium oxysporum f. sp. lycopersici (strain 4287 / CBS 123668 / FGSC 9935 / NRRL 34936) OX=426428 GN=FOXG_16758 PE=4 SV=1	4	2	0.0233	64294.6	6.41
$486-1	tr|A0A0J9UAQ4|A0A0J9UAQ4_FUSO4 CN hydrolase domain-containing protein OS=Fusarium oxysporum f. sp. lycopersici (strain 4287 / CBS 123668 / FGSC 9935 / NRRL 34936) OX=426428 GN=FOXG_01601 PE=4 SV=1	4	2	0.0121	107915	7.4
$486-2	tr|A0A0J9UC17|A0A0J9UC17_FUSO4 CN hydrolase domain-containing protein OS=Fusarium oxysporum f. sp. lycopersici (strain 4287 / CBS 123668 / FGSC 9935 / NRRL 34936) OX=426428 GN=FOXG_01601 PE=4 SV=1	4	2	0.0116	112025	6.72
$486-3	tr|A0A0D2XCH8|A0A0D2XCH8_FUSO4 CN hydrolase domain-containing protein OS=Fusarium oxysporum f. sp. lycopersici (strain 4287 / CBS 123668 / FGSC 9935 / NRRL 34936) OX=426428 PE=4 SV=1	4	2	0.012	109254	7.39
$487-1	tr|A0A0J9UH43|A0A0J9UH43_FUSO4 Uncharacterized protein OS=Fusarium oxysporum f. sp. lycopersici (strain 4287 / CBS 123668 / FGSC 9935 / NRRL 34936) OX=426428 GN=FOXG_02150 PE=3 SV=1	4	2	0.0074	212929	5.86
$487-2	tr|A0A0J9UDL7|A0A0J9UDL7_FUSO4 Uncharacterized protein OS=Fusarium oxysporum f. sp. lycopersici (strain 4287 / CBS 123668 / FGSC 9935 / NRRL 34936) OX=426428 GN=FOXG_02150 PE=3 SV=1	4	2	0.0078	204286	5.7
$488-1	tr|A0A0J9V5K7|A0A0J9V5K7_FUSO4 Complex I-B22 OS=Fusarium oxysporum f. sp. lycopersici (strain 4287 / CBS 123668 / FGSC 9935 / NRRL 34936) OX=426428 GN=FOXG_08174 PE=3 SV=1	4	2	0.2178	11769.3	10.4
$489-1	tr|A0A0J9WPT0|A0A0J9WPT0_FUSO4 Uncharacterized protein OS=Fusarium oxysporum f. sp. lycopersici (strain 4287 / CBS 123668 / FGSC 9935 / NRRL 34936) OX=426428 GN=FOXG_10118 PE=3 SV=1	4	2	0.0109	139677	6.27
$489-2	tr|A0A0D2Y1H5|A0A0D2Y1H5_FUSO4 Uncharacterized protein OS=Fusarium oxysporum f. sp. lycopersici (strain 4287 / CBS 123668 / FGSC 9935 / NRRL 34936) OX=426428 PE=3 SV=1	4	2	0.0114	133812	6.31
$490-1	sp|A0A0D2YFZ8|FUB11_FUSO4 Efflux pump FUB11 OS=Fusarium oxysporum f. sp. lycopersici (strain 4287 / CBS 123668 / FGSC 9935 / NRRL 34936) OX=426428 GN=FUB11 PE=1 SV=1	3	2	0.0405	65052.8	9.29
$491-1	tr|A0A0D2X9E4|A0A0D2X9E4_FUSO4 Uncharacterized protein OS=Fusarium oxysporum f. sp. lycopersici (strain 4287 / CBS 123668 / FGSC 9935 / NRRL 34936) OX=426428 PE=4 SV=1	3	2	0.0071	206009	5.49
$491-2	tr|A0A0J9U6J1|A0A0J9U6J1_FUSO4 Uncharacterized protein OS=Fusarium oxysporum f. sp. lycopersici (strain 4287 / CBS 123668 / FGSC 9935 / NRRL 34936) OX=426428 GN=FOXG_00505 PE=4 SV=1	3	2	0.007	208468	5.45
$492-1	tr|A0A0D2XB67|A0A0D2XB67_FUSO4 40S ribosomal protein S21 OS=Fusarium oxysporum f. sp. lycopersici (strain 4287 / CBS 123668 / FGSC 9935 / NRRL 34936) OX=426428 GN=FOXG_01135 PE=3 SV=1	3	2	0.2989	9658.79	7.81
$493-1	tr|A0A0D2XC21|A0A0D2XC21_FUSO4 Uncharacterized protein OS=Fusarium oxysporum f. sp. lycopersici (strain 4287 / CBS 123668 / FGSC 9935 / NRRL 34936) OX=426428 GN=FOXG_01444 PE=4 SV=1	3	2	0.0206	54620.3	4.52
$494-1	tr|A0A0D2XDK5|A0A0D2XDK5_FUSO4 ATP-dependent RNA helicase eIF4A OS=Fusarium oxysporum f. sp. lycopersici (strain 4287 / CBS 123668 / FGSC 9935 / NRRL 34936) OX=426428 GN=FOXG_01985 PE=3 SV=1	3	2	0.0732	44784	4.98
$495-1	tr|A0A0D2XDU2|A0A0D2XDU2_FUSO4 Structural maintenance of chromosomes protein OS=Fusarium oxysporum f. sp. lycopersici (strain 4287 / CBS 123668 / FGSC 9935 / NRRL 34936) OX=426428 GN=FOXG_02072 PE=3 SV=1	3	2	0.01	136901	5.93
$496-1	tr|A0A0D2XDY9|A0A0D2XDY9_FUSO4 Peptidyl-prolyl cis-trans isomerase OS=Fusarium oxysporum f. sp. lycopersici (strain 4287 / CBS 123668 / FGSC 9935 / NRRL 34936) OX=426428 GN=FOXG_02120 PE=3 SV=1	3	2	0.1024	13801.5	9.24
$497-1	tr|A0A0D2XE29|A0A0D2XE29_FUSO4 Uncharacterized protein OS=Fusarium oxysporum f. sp. lycopersici (strain 4287 / CBS 123668 / FGSC 9935 / NRRL 34936) OX=426428 GN=FOXG_02160 PE=3 SV=1	3	2	0.0884	19250.2	8.87
$498-1	tr|A0A0D2XET2|A0A0D2XET2_FUSO4 Signal recognition particle receptor subunit beta OS=Fusarium oxysporum f. sp. lycopersici (strain 4287 / CBS 123668 / FGSC 9935 / NRRL 34936) OX=426428 PE=3 SV=1	3	2	0.0644	31986.1	6.31
$498-2	tr|A0A0J9UIG9|A0A0J9UIG9_FUSO4 Signal recognition particle receptor subunit beta OS=Fusarium oxysporum f. sp. lycopersici (strain 4287 / CBS 123668 / FGSC 9935 / NRRL 34936) OX=426428 GN=FOXG_02419 PE=3 SV=1	3	2	0.0669	30658.6	5.5
$499-1	tr|A0A0D2XGQ7|A0A0D2XGQ7_FUSO4 Copper transporter OS=Fusarium oxysporum f. sp. lycopersici (strain 4287 / CBS 123668 / FGSC 9935 / NRRL 34936) OX=426428 GN=FOXG_03101 PE=3 SV=1	3	2	0.1077	21256.4	8.66
$500-1	tr|A0A0D2XGS2|A0A0D2XGS2_FUSO4 Non-specific serine/threonine protein kinase OS=Fusarium oxysporum f. sp. lycopersici (strain 4287 / CBS 123668 / FGSC 9935 / NRRL 34936) OX=426428 PE=4 SV=1	3	2	0.0175	102439	5.82
$501-1	tr|A0A0D2XHE5|A0A0D2XHE5_FUSO4 Vesicle-associated membrane protein 4 OS=Fusarium oxysporum f. sp. lycopersici (strain 4287 / CBS 123668 / FGSC 9935 / NRRL 34936) OX=426428 GN=FOXG_03343 PE=4 SV=1	3	2	0.2393	12963.9	9.64
$501-2	tr|A0A0J9UJM0|A0A0J9UJM0_FUSO4 Vesicle-associated membrane protein 4 OS=Fusarium oxysporum f. sp. lycopersici (strain 4287 / CBS 123668 / FGSC 9935 / NRRL 34936) OX=426428 GN=FOXG_03343 PE=4 SV=1	3	2	0.2154	14473.5	8.93
$502-1	tr|A0A0D2XHL1|A0A0D2XHL1_FUSO4 Uncharacterized protein OS=Fusarium oxysporum f. sp. lycopersici (strain 4287 / CBS 123668 / FGSC 9935 / NRRL 34936) OX=426428 GN=FOXG_03409 PE=4 SV=1	3	2	0.0111	71110.2	7.22
$503-1	tr|A0A0D2XIE4|A0A0D2XIE4_FUSO4 AB hydrolase-1 domain-containing protein OS=Fusarium oxysporum f. sp. lycopersici (strain 4287 / CBS 123668 / FGSC 9935 / NRRL 34936) OX=426428 PE=4 SV=1	3	2	0.0695	28135.7	6.08
$503-2	tr|A0A0J9WJB7|A0A0J9WJB7_FUSO4 AB hydrolase-1 domain-containing protein OS=Fusarium oxysporum f. sp. lycopersici (strain 4287 / CBS 123668 / FGSC 9935 / NRRL 34936) OX=426428 GN=FOXG_03697 PE=4 SV=1	3	2	0.0463	42586.2	6.16
$504-1	tr|A0A0D2XK22|A0A0D2XK22_FUSO4 SAP domain-containing protein OS=Fusarium oxysporum f. sp. lycopersici (strain 4287 / CBS 123668 / FGSC 9935 / NRRL 34936) OX=426428 GN=FOXG_04291 PE=4 SV=1	3	2	0.083	27191.5	5.74
$505-1	tr|A0A0D2XKD9|A0A0D2XKD9_FUSO4 Oxidoreductase OS=Fusarium oxysporum f. sp. lycopersici (strain 4287 / CBS 123668 / FGSC 9935 / NRRL 34936) OX=426428 GN=FOXG_04413 PE=4 SV=1	3	2	0.0552	40152.1	6.28
$506-1	tr|A0A0D2XLL9|A0A0D2XLL9_FUSO4 Uncharacterized protein OS=Fusarium oxysporum f. sp. lycopersici (strain 4287 / CBS 123668 / FGSC 9935 / NRRL 34936) OX=426428 GN=FOXG_04843 PE=4 SV=1	3	2	0.0113	169496	5.07
$507-1	tr|A0A0D2XLT3|A0A0D2XLT3_FUSO4 Rtt106 domain-containing protein OS=Fusarium oxysporum f. sp. lycopersici (strain 4287 / CBS 123668 / FGSC 9935 / NRRL 34936) OX=426428 PE=4 SV=1	3	2	0.03	55168.8	4.43
$508-1	tr|A0A0D2XPS3|A0A0D2XPS3_FUSO4 Fructose-bisphosphatase OS=Fusarium oxysporum f. sp. lycopersici (strain 4287 / CBS 123668 / FGSC 9935 / NRRL 34936) OX=426428 GN=FOXG_05961 PE=3 SV=1	3	2	0.076	37486.1	5.64
$509-1	tr|A0A0D2XSV4|A0A0D2XSV4_FUSO4 Uncharacterized protein OS=Fusarium oxysporum f. sp. lycopersici (strain 4287 / CBS 123668 / FGSC 9935 / NRRL 34936) OX=426428 PE=4 SV=1	3	2	0.02	78322.1	6.3
$509-2	tr|A0A0J9V4X7|A0A0J9V4X7_FUSO4 Uncharacterized protein OS=Fusarium oxysporum f. sp. lycopersici (strain 4287 / CBS 123668 / FGSC 9935 / NRRL 34936) OX=426428 GN=FOXG_07056 PE=4 SV=1	3	2	0.0188	83304.9	6.56
$510-1	tr|A0A0D2XVB1|A0A0D2XVB1_FUSO4 CFEM domain-containing protein OS=Fusarium oxysporum f. sp. lycopersici (strain 4287 / CBS 123668 / FGSC 9935 / NRRL 34936) OX=426428 GN=FOXG_07920 PE=3 SV=1	3	2	0.1115	30877.3	3.91
$511-1	tr|A0A0D2XVF9|A0A0D2XVF9_FUSO4 Protein transport protein sec16 OS=Fusarium oxysporum f. sp. lycopersici (strain 4287 / CBS 123668 / FGSC 9935 / NRRL 34936) OX=426428 GN=FOXG_07971 PE=3 SV=1	3	2	0.0062	204727	4.9
$512-1	tr|A0A0D2XVK2|A0A0D2XVK2_FUSO4 Protein transport protein SEC31 OS=Fusarium oxysporum f. sp. lycopersici (strain 4287 / CBS 123668 / FGSC 9935 / NRRL 34936) OX=426428 GN=FOXG_08014 PE=3 SV=1	3	2	0.0086	137327	5.46
$513-1	tr|A0A0D2XVY9|A0A0D2XVY9_FUSO4 Signal recognition particle subunit SRP14 OS=Fusarium oxysporum f. sp. lycopersici (strain 4287 / CBS 123668 / FGSC 9935 / NRRL 34936) OX=426428 GN=FOXG_08153 PE=3 SV=1	3	2	0.1719	14146.1	9.82
$514-1	tr|A0A0D2XW09|A0A0D2XW09_FUSO4 Histone H2A OS=Fusarium oxysporum f. sp. lycopersici (strain 4287 / CBS 123668 / FGSC 9935 / NRRL 34936) OX=426428 GN=FOXG_08173 PE=3 SV=1	3	2	0.1194	14154.1	10.55
$515-1	tr|A0A0D2XW16|A0A0D2XW16_FUSO4 SRP40_C domain-containing protein OS=Fusarium oxysporum f. sp. lycopersici (strain 4287 / CBS 123668 / FGSC 9935 / NRRL 34936) OX=426428 GN=FOXG_08180 PE=4 SV=1	3	2	0.0369	52308.1	4.91
$516-1	tr|A0A0D2XW30|A0A0D2XW30_FUSO4 40S ribosomal protein S27 OS=Fusarium oxysporum f. sp. lycopersici (strain 4287 / CBS 123668 / FGSC 9935 / NRRL 34936) OX=426428 GN=FOXG_08194 PE=3 SV=1	3	2	0.2805	8853.46	9.45
$517-1	tr|A0A0D2XYI3|A0A0D2XYI3_FUSO4 Uncharacterized protein OS=Fusarium oxysporum f. sp. lycopersici (strain 4287 / CBS 123668 / FGSC 9935 / NRRL 34936) OX=426428 GN=FOXG_09055 PE=4 SV=1	3	2	0.0302	49524.8	4.79
$518-1	tr|A0A0D2XZB3|A0A0D2XZB3_FUSO4 Conserved oligomeric Golgi complex subunit 1 OS=Fusarium oxysporum f. sp. lycopersici (strain 4287 / CBS 123668 / FGSC 9935 / NRRL 34936) OX=426428 GN=FOXG_09340 PE=3 SV=1	3	2	0.0282	91684.2	5.24
$519-1	tr|A0A0D2XZF1|A0A0D2XZF1_FUSO4 G-patch_2 domain-containing protein OS=Fusarium oxysporum f. sp. lycopersici (strain 4287 / CBS 123668 / FGSC 9935 / NRRL 34936) OX=426428 GN=FOXG_09380 PE=3 SV=1	3	2	0.0639	41791	9.09
$520-1	tr|A0A0D2XZM2|A0A0D2XZM2_FUSO4 Cell division control protein 42 homolog OS=Fusarium oxysporum f. sp. lycopersici (strain 4287 / CBS 123668 / FGSC 9935 / NRRL 34936) OX=426428 GN=FOXG_09453 PE=3 SV=1	3	2	0.0923	21737.9	5.95
$521-1	tr|A0A0D2Y2F7|A0A0D2Y2F7_FUSO4 Uncharacterized protein OS=Fusarium oxysporum f. sp. lycopersici (strain 4287 / CBS 123668 / FGSC 9935 / NRRL 34936) OX=426428 GN=FOXG_10454 PE=3 SV=1	3	2	0.061	37087.2	5.32
$522-1	tr|A0A0D2Y2Q2|A0A0D2Y2Q2_FUSO4 Translationally-controlled tumor protein homolog OS=Fusarium oxysporum f. sp. lycopersici (strain 4287 / CBS 123668 / FGSC 9935 / NRRL 34936) OX=426428 GN=FOXG_10551 PE=3 SV=1	3	2	0.125	18358.6	4.24
$523-1	tr|A0A0D2Y6X5|A0A0D2Y6X5_FUSO4 Uncharacterized protein OS=Fusarium oxysporum f. sp. lycopersici (strain 4287 / CBS 123668 / FGSC 9935 / NRRL 34936) OX=426428 PE=4 SV=1	3	2	0.0361	56550.8	5.17
$523-2	tr|A0A0J9VP52|A0A0J9VP52_FUSO4 Bac_rhamnosid6H domain-containing protein OS=Fusarium oxysporum f. sp. lycopersici (strain 4287 / CBS 123668 / FGSC 9935 / NRRL 34936) OX=426428 GN=FOXG_12035 PE=4 SV=1	3	2	0.032	63675.7	5.43
$524-1	tr|A0A0D2Y7H3|A0A0D2Y7H3_FUSO4 Uncharacterized protein OS=Fusarium oxysporum f. sp. lycopersici (strain 4287 / CBS 123668 / FGSC 9935 / NRRL 34936) OX=426428 GN=FOXG_12237 PE=3 SV=1	3	2	0.0088	73418	8.48
$525-1	tr|A0A0D2Y963|A0A0D2Y963_FUSO4 Phosphatidate cytidylyltransferase OS=Fusarium oxysporum f. sp. lycopersici (strain 4287 / CBS 123668 / FGSC 9935 / NRRL 34936) OX=426428 GN=FOXG_12833 PE=4 SV=1	3	2	0.0466	45055.1	9.77
$526-1	tr|A0A0D2Y9B5|A0A0D2Y9B5_FUSO4 40S ribosomal protein S26 OS=Fusarium oxysporum f. sp. lycopersici (strain 4287 / CBS 123668 / FGSC 9935 / NRRL 34936) OX=426428 GN=FOXG_12885 PE=3 SV=1	3	2	0.1368	13281.6	10.93
$527-1	tr|A0A0D2Y9Q6|A0A0D2Y9Q6_FUSO4 Amine oxidase OS=Fusarium oxysporum f. sp. lycopersici (strain 4287 / CBS 123668 / FGSC 9935 / NRRL 34936) OX=426428 GN=FOXG_13026 PE=3 SV=1	3	2	0.0126	88507.7	6.06
$528-1	tr|A0A0D2YBG4|A0A0D2YBG4_FUSO4 Glutamyl-tRNA synthetase OS=Fusarium oxysporum f. sp. lycopersici (strain 4287 / CBS 123668 / FGSC 9935 / NRRL 34936) OX=426428 GN=FOXG_13642 PE=3 SV=1	3	2	0.0175	71127.8	6.32
$529-1	tr|A0A0D2YC94|A0A0D2YC94_FUSO4 Cytochrome c oxidase polypeptide 5, mitochondrial OS=Fusarium oxysporum f. sp. lycopersici (strain 4287 / CBS 123668 / FGSC 9935 / NRRL 34936) OX=426428 GN=FOXG_13925 PE=4 SV=1	3	2	0.1361	18414.8	9.79
$530-1	tr|A0A0D2YCB9|A0A0D2YCB9_FUSO4 Uncharacterized protein OS=Fusarium oxysporum f. sp. lycopersici (strain 4287 / CBS 123668 / FGSC 9935 / NRRL 34936) OX=426428 GN=FOXG_13950 PE=4 SV=1	3	2	0.0351	54219.1	9.5
$531-1	tr|A0A0D2YFA0|A0A0D2YFA0_FUSO4 ATP-dependent DNA helicase OS=Fusarium oxysporum f. sp. lycopersici (strain 4287 / CBS 123668 / FGSC 9935 / NRRL 34936) OX=426428 GN=FOXG_14988 PE=3 SV=1	3	2	0.006	223834	8.2
$532-1	tr|A0A0D2YKU9|A0A0D2YKU9_FUSO4 C3H1-type domain-containing protein OS=Fusarium oxysporum f. sp. lycopersici (strain 4287 / CBS 123668 / FGSC 9935 / NRRL 34936) OX=426428 GN=FOXG_17767 PE=4 SV=1	3	2	0.0216	65437.3	9.29
$533-1	tr|A0A0J9UAY8|A0A0J9UAY8_FUSO4 Uncharacterized protein OS=Fusarium oxysporum f. sp. lycopersici (strain 4287 / CBS 123668 / FGSC 9935 / NRRL 34936) OX=426428 GN=FOXG_18080 PE=4 SV=1	3	2	0.013	123740	6.17
$533-2	tr|A0A0J9W4M6|A0A0J9W4M6_FUSO4 Uncharacterized protein OS=Fusarium oxysporum f. sp. lycopersici (strain 4287 / CBS 123668 / FGSC 9935 / NRRL 34936) OX=426428 GN=FOXG_22034 PE=4 SV=1	3	2	0.013	123152	6.01
$533-3	tr|A0A0D2YGS7|A0A0D2YGS7_FUSO4 Uncharacterized protein OS=Fusarium oxysporum f. sp. lycopersici (strain 4287 / CBS 123668 / FGSC 9935 / NRRL 34936) OX=426428 PE=4 SV=1	3	2	0.0486	33137.7	5.19
$533-4	tr|A0A0D2XBW6|A0A0D2XBW6_FUSO4 Uncharacterized protein OS=Fusarium oxysporum f. sp. lycopersici (strain 4287 / CBS 123668 / FGSC 9935 / NRRL 34936) OX=426428 PE=4 SV=1	3	2	0.0415	38594.7	5.16
$533-5	tr|A0A0C4DHZ4|A0A0C4DHZ4_FUSO4 Uncharacterized protein OS=Fusarium oxysporum f. sp. lycopersici (strain 4287 / CBS 123668 / FGSC 9935 / NRRL 34936) OX=426428 PE=4 SV=1	3	2	0.0403	39598.8	5.46
$533-6	tr|A0A0J9W639|A0A0J9W639_FUSO4 Uncharacterized protein OS=Fusarium oxysporum f. sp. lycopersici (strain 4287 / CBS 123668 / FGSC 9935 / NRRL 34936) OX=426428 GN=FOXG_22167 PE=4 SV=1	3	2	0.013	122895	6.01
$534-1	tr|A0A0J9UTY7|A0A0J9UTY7_FUSO4 Uncharacterized protein OS=Fusarium oxysporum f. sp. lycopersici (strain 4287 / CBS 123668 / FGSC 9935 / NRRL 34936) OX=426428 GN=FOXG_05277 PE=4 SV=1	3	2	0.0188	76972.8	6.02
$534-2	tr|A0A0D2XMV0|A0A0D2XMV0_FUSO4 Uncharacterized protein OS=Fusarium oxysporum f. sp. lycopersici (strain 4287 / CBS 123668 / FGSC 9935 / NRRL 34936) OX=426428 GN=FOXG_05277 PE=4 SV=1	3	2	0.0184	78662.5	6.02
$535-1	tr|A0A0J9UTZ9|A0A0J9UTZ9_FUSO4 Uncharacterized protein OS=Fusarium oxysporum f. sp. lycopersici (strain 4287 / CBS 123668 / FGSC 9935 / NRRL 34936) OX=426428 GN=FOXG_05002 PE=4 SV=1	3	2	0.0509	24782	8.78
$535-2	tr|A0A0D2XM28|A0A0D2XM28_FUSO4 CTP_transf_like domain-containing protein OS=Fusarium oxysporum f. sp. lycopersici (strain 4287 / CBS 123668 / FGSC 9935 / NRRL 34936) OX=426428 PE=4 SV=1	3	2	0.0358	34956.5	9.14
$536-1	tr|A0A0J9UV17|A0A0J9UV17_FUSO4 Translation initiation factor 2 subunit 2 OS=Fusarium oxysporum f. sp. lycopersici (strain 4287 / CBS 123668 / FGSC 9935 / NRRL 34936) OX=426428 GN=FOXG_05455 PE=3 SV=1	3	2	0.0389	36990.2	6.58
$536-2	tr|A0A0J9UW25|A0A0J9UW25_FUSO4 Translation initiation factor 2 subunit 2 OS=Fusarium oxysporum f. sp. lycopersici (strain 4287 / CBS 123668 / FGSC 9935 / NRRL 34936) OX=426428 GN=FOXG_05455 PE=3 SV=1	3	2	0.0362	40094.1	8.63
$536-3	tr|A0A0J9UW30|A0A0J9UW30_FUSO4 Translation initiation factor 2 subunit 2 OS=Fusarium oxysporum f. sp. lycopersici (strain 4287 / CBS 123668 / FGSC 9935 / NRRL 34936) OX=426428 GN=FOXG_05455 PE=3 SV=1	3	2	0.0456	31762.5	8.41
$536-4	tr|A0A0J9UTZ6|A0A0J9UTZ6_FUSO4 Translation initiation factor 2 subunit 2 OS=Fusarium oxysporum f. sp. lycopersici (strain 4287 / CBS 123668 / FGSC 9935 / NRRL 34936) OX=426428 GN=FOXG_05455 PE=3 SV=1	3	2	0.0429	33640.5	8.12
$536-5	tr|A0A0D2XNC5|A0A0D2XNC5_FUSO4 Translation initiation factor 2 subunit 2 OS=Fusarium oxysporum f. sp. lycopersici (strain 4287 / CBS 123668 / FGSC 9935 / NRRL 34936) OX=426428 GN=FOXG_05455 PE=3 SV=1	3	2	0.0411	35112.2	6.98
$537-1	tr|A0A0J9V8A4|A0A0J9V8A4_FUSO4 Uncharacterized protein OS=Fusarium oxysporum f. sp. lycopersici (strain 4287 / CBS 123668 / FGSC 9935 / NRRL 34936) OX=426428 GN=FOXG_08794 PE=4 SV=1	3	2	0.0244	58575.7	6.41
$538-1	tr|A0A0J9V978|A0A0J9V978_FUSO4 Uncharacterized protein OS=Fusarium oxysporum f. sp. lycopersici (strain 4287 / CBS 123668 / FGSC 9935 / NRRL 34936) OX=426428 GN=FOXG_09069 PE=4 SV=1	3	2	0.1294	18474.5	8.71
$538-2	tr|A0A0D2XYJ7|A0A0D2XYJ7_FUSO4 Uncharacterized protein OS=Fusarium oxysporum f. sp. lycopersici (strain 4287 / CBS 123668 / FGSC 9935 / NRRL 34936) OX=426428 PE=4 SV=1	3	2	0.1189	19956.1	8.58
$539-1	tr|A0A0J9VJT4|A0A0J9VJT4_FUSO4 Uncharacterized protein OS=Fusarium oxysporum f. sp. lycopersici (strain 4287 / CBS 123668 / FGSC 9935 / NRRL 34936) OX=426428 GN=FOXG_11361 PE=3 SV=1	3	2	0.0695	37232.7	6.06
$540-1	tr|A0A0J9VLG3|A0A0J9VLG3_FUSO4 Acetyltransferase OS=Fusarium oxysporum f. sp. lycopersici (strain 4287 / CBS 123668 / FGSC 9935 / NRRL 34936) OX=426428 GN=FOXG_11446 PE=3 SV=1	3	2	0.0216	84108.6	9.12
$540-2	tr|A0A0D2Y591|A0A0D2Y591_FUSO4 Acetyltransferase OS=Fusarium oxysporum f. sp. lycopersici (strain 4287 / CBS 123668 / FGSC 9935 / NRRL 34936) OX=426428 GN=FOXG_11446 PE=3 SV=1	3	2	0.0192	94571	8.43
$541-1	tr|A0A0J9VNW7|A0A0J9VNW7_FUSO4 HET domain-containing protein OS=Fusarium oxysporum f. sp. lycopersici (strain 4287 / CBS 123668 / FGSC 9935 / NRRL 34936) OX=426428 GN=FOXG_12273 PE=4 SV=1	3	2	0.0121	175283	6.42
$542-1	tr|A0A0J9WAZ3|A0A0J9WAZ3_FUSO4 HET domain-containing protein OS=Fusarium oxysporum f. sp. lycopersici (strain 4287 / CBS 123668 / FGSC 9935 / NRRL 34936) OX=426428 GN=FOXG_16886 PE=4 SV=1	3	2	0.0226	90726.3	5.17
$543-1	tr|A0A0J9WGY1|A0A0J9WGY1_FUSO4 Uncharacterized protein OS=Fusarium oxysporum f. sp. lycopersici (strain 4287 / CBS 123668 / FGSC 9935 / NRRL 34936) OX=426428 GN=FOXG_01237 PE=4 SV=1	3	2	0.0228	78612.4	5.92
$544-1	tr|A0A0J9WK04|A0A0J9WK04_FUSO4 Zn(2)-C6 fungal-type domain-containing protein OS=Fusarium oxysporum f. sp. lycopersici (strain 4287 / CBS 123668 / FGSC 9935 / NRRL 34936) OX=426428 GN=FOXG_04480 PE=4 SV=1	3	2	0.0165	81116.5	5.96
$544-2	tr|A0A0J9UQF3|A0A0J9UQF3_FUSO4 Uncharacterized protein OS=Fusarium oxysporum f. sp. lycopersici (strain 4287 / CBS 123668 / FGSC 9935 / NRRL 34936) OX=426428 GN=FOXG_04480 PE=4 SV=1	3	2	0.0207	64454.3	5.76
$545-1	tr|A0A0J9WRN1|A0A0J9WRN1_FUSO4 Uncharacterized protein OS=Fusarium oxysporum f. sp. lycopersici (strain 4287 / CBS 123668 / FGSC 9935 / NRRL 34936) OX=426428 GN=FOXG_12316 PE=4 SV=1	3	2	0.0153	115028	4.98
$546-1	tr|A0A2C8D1K8|A0A2C8D1K8_FUSOX Uncharacterized protein OS=Fusarium oxysporum f. sp. lycopersici OX=59765 GN=orf2265 PE=4 SV=1	3	2	0.0079	256757	4.87
$547-1	sp|J9MJK9|TAL1_FUSO4 Transaldolase OS=Fusarium oxysporum f. sp. lycopersici (strain 4287 / CBS 123668 / FGSC 9935 / NRRL 34936) OX=426428 GN=FOXG_03074 PE=1 SV=1	2	2	0.0526	35547	5.11
$547-2	tr|A0A0J9UHF3|A0A0J9UHF3_FUSO4 Transaldolase OS=Fusarium oxysporum f. sp. lycopersici (strain 4287 / CBS 123668 / FGSC 9935 / NRRL 34936) OX=426428 GN=FOXG_03074 PE=3 SV=1	2	2	0.0526	35547	5.11
$548-1	tr|A0A0C4BKT7|A0A0C4BKT7_FUSO4 Uncharacterized protein OS=Fusarium oxysporum f. sp. lycopersici (strain 4287 / CBS 123668 / FGSC 9935 / NRRL 34936) OX=426428 GN=FOXG_16020 PE=4 SV=1	2	2	0.0243	59733	5.18
$548-2	tr|A0A0J9W4L0|A0A0J9W4L0_FUSO4 Uncharacterized protein OS=Fusarium oxysporum f. sp. lycopersici (strain 4287 / CBS 123668 / FGSC 9935 / NRRL 34936) OX=426428 GN=FOXG_15562 PE=4 SV=1	2	2	0.0207	70426	5.32
$549-1	tr|A0A0C4DHU5|A0A0C4DHU5_FUSO4 DNA topoisomerase 2 OS=Fusarium oxysporum f. sp. lycopersici (strain 4287 / CBS 123668 / FGSC 9935 / NRRL 34936) OX=426428 PE=3 SV=1	2	2	0.0086	182463	7.39
$549-2	tr|A0A0J9V6Q0|A0A0J9V6Q0_FUSO4 DNA topoisomerase 2 OS=Fusarium oxysporum f. sp. lycopersici (strain 4287 / CBS 123668 / FGSC 9935 / NRRL 34936) OX=426428 GN=FOXG_08257 PE=3 SV=1	2	2	0.0081	194403	8.41
$550-1	tr|A0A0C4DHU6|A0A0C4DHU6_FUSO4 Ras protein OS=Fusarium oxysporum f. sp. lycopersici (strain 4287 / CBS 123668 / FGSC 9935 / NRRL 34936) OX=426428 GN=FOXG_08282 PE=4 SV=1	2	2	0.088	24221.1	4.88
$551-1	tr|A0A0C4DHW0|A0A0C4DHW0_FUSO4 Mitochondrial DNA replication protein YHM2 OS=Fusarium oxysporum f. sp. lycopersici (strain 4287 / CBS 123668 / FGSC 9935 / NRRL 34936) OX=426428 GN=FOXG_11292 PE=3 SV=1	2	2	0.0535	34180.3	9.72
$552-1	tr|A0A0C4DHW6|A0A0C4DHW6_FUSO4 Cytochrome c OS=Fusarium oxysporum f. sp. lycopersici (strain 4287 / CBS 123668 / FGSC 9935 / NRRL 34936) OX=426428 GN=FOXG_12815 PE=3 SV=1	2	2	0.2075	11698.2	9.32
$553-1	tr|A0A0C4DJ97|A0A0C4DJ97_FUSO4 PAD domain-containing protein OS=Fusarium oxysporum f. sp. lycopersici (strain 4287 / CBS 123668 / FGSC 9935 / NRRL 34936) OX=426428 GN=FOXG_17535 PE=4 SV=1	2	2	0.0298	70287.1	9.13
$554-1	tr|A0A0C4DJA6|A0A0C4DJA6_FUSO4 T5orf172 domain-containing protein OS=Fusarium oxysporum f. sp. lycopersici (strain 4287 / CBS 123668 / FGSC 9935 / NRRL 34936) OX=426428 PE=4 SV=1	2	2	0.029	57977.2	9.17
$554-2	tr|A0A0J9WCU4|A0A0J9WCU4_FUSO4 T5orf172 domain-containing protein OS=Fusarium oxysporum f. sp. lycopersici (strain 4287 / CBS 123668 / FGSC 9935 / NRRL 34936) OX=426428 GN=FOXG_17556 PE=4 SV=1	2	2	0.028	60081.6	9.1
$555-1	tr|A0A0D2X8C8|A0A0D2X8C8_FUSO4 Threonyl-tRNA synthetase OS=Fusarium oxysporum f. sp. lycopersici (strain 4287 / CBS 123668 / FGSC 9935 / NRRL 34936) OX=426428 PE=3 SV=1	2	2	0.0322	84562	6.54
$555-2	tr|A0A0J9U6S0|A0A0J9U6S0_FUSO4 Threonyl-tRNA synthetase OS=Fusarium oxysporum f. sp. lycopersici (strain 4287 / CBS 123668 / FGSC 9935 / NRRL 34936) OX=426428 GN=FOXG_00137 PE=3 SV=1	2	2	0.0309	88396.4	7.6
$556-1	tr|A0A0D2X8F4|A0A0D2X8F4_FUSO4 BAH domain-containing protein OS=Fusarium oxysporum f. sp. lycopersici (strain 4287 / CBS 123668 / FGSC 9935 / NRRL 34936) OX=426428 GN=FOXG_00163 PE=4 SV=1	2	2	0.0329	48173.3	6.84
$556-2	tr|A0A0J9V5Y4|A0A0J9V5Y4_FUSO4 BAH domain-containing protein OS=Fusarium oxysporum f. sp. lycopersici (strain 4287 / CBS 123668 / FGSC 9935 / NRRL 34936) OX=426428 GN=FOXG_07017 PE=4 SV=1	2	2	0.0329	48334.5	6.18
$556-3	tr|A0A0D2XSR5|A0A0D2XSR5_FUSO4 Uncharacterized protein OS=Fusarium oxysporum f. sp. lycopersici (strain 4287 / CBS 123668 / FGSC 9935 / NRRL 34936) OX=426428 PE=4 SV=1	2	2	0.0337	47347.3	6.45
$557-1	tr|A0A0D2X8G8|A0A0D2X8G8_FUSO4 PWWP domain-containing protein OS=Fusarium oxysporum f. sp. lycopersici (strain 4287 / CBS 123668 / FGSC 9935 / NRRL 34936) OX=426428 GN=FOXG_00177 PE=4 SV=1	2	2	0.0347	63021.4	5.5
$558-1	tr|A0A0D2X8G9|A0A0D2X8G9_FUSO4 Uncharacterized protein OS=Fusarium oxysporum f. sp. lycopersici (strain 4287 / CBS 123668 / FGSC 9935 / NRRL 34936) OX=426428 GN=FOXG_00178 PE=4 SV=1	2	2	0.0063	250109	5.09
$559-1	tr|A0A0D2X8H7|A0A0D2X8H7_FUSO4 Sterol-4alpha-carboxylate 3-dehydrogenase (Decarboxylating) OS=Fusarium oxysporum f. sp. lycopersici (strain 4287 / CBS 123668 / FGSC 9935 / NRRL 34936) OX=426428 GN=FOXG_00186 PE=4 SV=1	2	2	0.0557	41343.4	6.47
$560-1	tr|A0A0D2X8P5|A0A0D2X8P5_FUSO4 Ribosome biogenesis protein NSA2 homolog OS=Fusarium oxysporum f. sp. lycopersici (strain 4287 / CBS 123668 / FGSC 9935 / NRRL 34936) OX=426428 GN=FOXG_00254 PE=3 SV=1	2	2	0.0923	29757.3	10.38
$561-1	tr|A0A0D2X8R6|A0A0D2X8R6_FUSO4 Uncharacterized protein OS=Fusarium oxysporum f. sp. lycopersici (strain 4287 / CBS 123668 / FGSC 9935 / NRRL 34936) OX=426428 GN=FOXG_00275 PE=4 SV=1	2	2	0.2	10429.9	10.52
$562-1	tr|A0A0D2X8S0|A0A0D2X8S0_FUSO4 6-phosphogluconate dehydrogenase, decarboxylating OS=Fusarium oxysporum f. sp. lycopersici (strain 4287 / CBS 123668 / FGSC 9935 / NRRL 34936) OX=426428 GN=FOXG_00279 PE=3 SV=1	2	2	0.0447	54201.1	5.86
$562-2	tr|A0A0J9U515|A0A0J9U515_FUSO4 6-phosphogluconate dehydrogenase, decarboxylating OS=Fusarium oxysporum f. sp. lycopersici (strain 4287 / CBS 123668 / FGSC 9935 / NRRL 34936) OX=426428 GN=FOXG_00279 PE=3 SV=1	2	2	0.0449	54018.9	5.86
$563-1	tr|A0A0D2X8S1|A0A0D2X8S1_FUSO4 RRM domain-containing protein OS=Fusarium oxysporum f. sp. lycopersici (strain 4287 / CBS 123668 / FGSC 9935 / NRRL 34936) OX=426428 GN=FOXG_00280 PE=4 SV=1	2	2	0.0286	37008.4	9.67
$564-1	tr|A0A0D2X8Z6|A0A0D2X8Z6_FUSO4 DNA repair protein REV1 OS=Fusarium oxysporum f. sp. lycopersici (strain 4287 / CBS 123668 / FGSC 9935 / NRRL 34936) OX=426428 PE=3 SV=1	2	2	0.0183	115283	9.13
$564-2	tr|A0A0J9U525|A0A0J9U525_FUSO4 DNA repair protein REV1 OS=Fusarium oxysporum f. sp. lycopersici (strain 4287 / CBS 123668 / FGSC 9935 / NRRL 34936) OX=426428 GN=FOXG_00356 PE=3 SV=1	2	2	0.0167	126770	9
$565-1	tr|A0A0D2X925|A0A0D2X925_FUSO4 Elongation factor 1-beta OS=Fusarium oxysporum f. sp. lycopersici (strain 4287 / CBS 123668 / FGSC 9935 / NRRL 34936) OX=426428 GN=FOXG_00385 PE=3 SV=1	2	2	0.0823	25251.7	4.36
$566-1	tr|A0A0D2X955|A0A0D2X955_FUSO4 Uncharacterized protein OS=Fusarium oxysporum f. sp. lycopersici (strain 4287 / CBS 123668 / FGSC 9935 / NRRL 34936) OX=426428 GN=FOXG_00415 PE=4 SV=1	2	2	0.0193	125051	9.09
$567-1	tr|A0A0D2X9C9|A0A0D2X9C9_FUSO4 Uncharacterized protein OS=Fusarium oxysporum f. sp. lycopersici (strain 4287 / CBS 123668 / FGSC 9935 / NRRL 34936) OX=426428 GN=FOXG_00490 PE=3 SV=1	2	2	0.0109	112684	5.03
$568-1	tr|A0A0D2X9I6|A0A0D2X9I6_FUSO4 Coatomer subunit zeta OS=Fusarium oxysporum f. sp. lycopersici (strain 4287 / CBS 123668 / FGSC 9935 / NRRL 34936) OX=426428 GN=FOXG_00551 PE=3 SV=1	2	2	0.1218	21862.7	4.83
$569-1	tr|A0A0D2X9J5|A0A0D2X9J5_FUSO4 Inorganic diphosphatase OS=Fusarium oxysporum f. sp. lycopersici (strain 4287 / CBS 123668 / FGSC 9935 / NRRL 34936) OX=426428 GN=FOXG_00560 PE=3 SV=1	2	2	0.0646	45623.9	8.48
$570-1	tr|A0A0D2X9M5|A0A0D2X9M5_FUSO4 Uncharacterized protein OS=Fusarium oxysporum f. sp. lycopersici (strain 4287 / CBS 123668 / FGSC 9935 / NRRL 34936) OX=426428 GN=FOXG_00590 PE=4 SV=1	2	2	0.06	43271.1	8.9
$571-1	tr|A0A0D2X9P5|A0A0D2X9P5_FUSO4 RRM domain-containing protein OS=Fusarium oxysporum f. sp. lycopersici (strain 4287 / CBS 123668 / FGSC 9935 / NRRL 34936) OX=426428 GN=FOXG_00610 PE=4 SV=1	2	2	0.1294	18511.4	8.86
$572-1	tr|A0A0D2X9Q1|A0A0D2X9Q1_FUSO4 Uncharacterized protein OS=Fusarium oxysporum f. sp. lycopersici (strain 4287 / CBS 123668 / FGSC 9935 / NRRL 34936) OX=426428 PE=4 SV=1	2	2	0.0652	31273.1	9.49
$572-2	tr|A0A0J9WGA8|A0A0J9WGA8_FUSO4 Uncharacterized protein OS=Fusarium oxysporum f. sp. lycopersici (strain 4287 / CBS 123668 / FGSC 9935 / NRRL 34936) OX=426428 GN=FOXG_00616 PE=4 SV=1	2	2	0.0625	32805.9	9.73
$573-1	tr|A0A0D2X9Q6|A0A0D2X9Q6_FUSO4 Dolichyl-diphosphooligosaccharide--protein glycotransferase OS=Fusarium oxysporum f. sp. lycopersici (strain 4287 / CBS 123668 / FGSC 9935 / NRRL 34936) OX=426428 GN=FOXG_00621 PE=3 SV=1	2	2	0.02	83335.9	8.92
$574-1	tr|A0A0D2X9Q7|A0A0D2X9Q7_FUSO4 ATP synthase subunit e, mitochondrial OS=Fusarium oxysporum f. sp. lycopersici (strain 4287 / CBS 123668 / FGSC 9935 / NRRL 34936) OX=426428 GN=FOXG_00622 PE=3 SV=1	2	2	0.2889	10042.3	8.93
$575-1	tr|A0A0D2X9R3|A0A0D2X9R3_FUSO4 1-phosphatidylinositol phosphodiesterase OS=Fusarium oxysporum f. sp. lycopersici (strain 4287 / CBS 123668 / FGSC 9935 / NRRL 34936) OX=426428 GN=FOXG_00628 PE=4 SV=1	2	2	0.0234	52989.8	7.98
$576-1	tr|A0A0D2X9V9|A0A0D2X9V9_FUSO4 Autophagy-related protein 11 OS=Fusarium oxysporum f. sp. lycopersici (strain 4287 / CBS 123668 / FGSC 9935 / NRRL 34936) OX=426428 PE=3 SV=1	2	2	0.016	155491	5.65
$576-2	tr|A0A0J9U6N2|A0A0J9U6N2_FUSO4 Autophagy-related protein 11 OS=Fusarium oxysporum f. sp. lycopersici (strain 4287 / CBS 123668 / FGSC 9935 / NRRL 34936) OX=426428 GN=FOXG_00674 PE=3 SV=1	2	2	0.0154	162361	5.58
$576-3	tr|A0A0J9WGD3|A0A0J9WGD3_FUSO4 Autophagy-related protein 11 OS=Fusarium oxysporum f. sp. lycopersici (strain 4287 / CBS 123668 / FGSC 9935 / NRRL 34936) OX=426428 GN=FOXG_00674 PE=3 SV=1	2	2	0.0156	159447	5.59
$576-4	tr|A0A0J9U765|A0A0J9U765_FUSO4 Autophagy-related protein 11 OS=Fusarium oxysporum f. sp. lycopersici (strain 4287 / CBS 123668 / FGSC 9935 / NRRL 34936) OX=426428 GN=FOXG_00674 PE=3 SV=1	2	2	0.0154	162233	5.58
$576-5	tr|A0A0J9U6N7|A0A0J9U6N7_FUSO4 Autophagy-related protein 11 OS=Fusarium oxysporum f. sp. lycopersici (strain 4287 / CBS 123668 / FGSC 9935 / NRRL 34936) OX=426428 GN=FOXG_00674 PE=3 SV=1	2	2	0.016	156273	5.59
$576-6	tr|A0A0J9U9R3|A0A0J9U9R3_FUSO4 Autophagy-related protein 11 OS=Fusarium oxysporum f. sp. lycopersici (strain 4287 / CBS 123668 / FGSC 9935 / NRRL 34936) OX=426428 GN=FOXG_00674 PE=3 SV=1	2	2	0.0156	159575	5.59
$576-7	tr|A0A0J9U7M6|A0A0J9U7M6_FUSO4 Autophagy-related protein 11 OS=Fusarium oxysporum f. sp. lycopersici (strain 4287 / CBS 123668 / FGSC 9935 / NRRL 34936) OX=426428 GN=FOXG_00674 PE=3 SV=1	2	2	0.0157	159059	5.58
$577-1	tr|A0A0D2X9W5|A0A0D2X9W5_FUSO4 NADH-ubiquinone oxidoreductase 49 kDa subunit, mitochondrial OS=Fusarium oxysporum f. sp. lycopersici (strain 4287 / CBS 123668 / FGSC 9935 / NRRL 34936) OX=426428 GN=FOXG_00680 PE=3 SV=1	2	2	0.0363	52682.7	6.48
$578-1	tr|A0A0D2XA21|A0A0D2XA21_FUSO4 Ribosomal_L16 domain-containing protein OS=Fusarium oxysporum f. sp. lycopersici (strain 4287 / CBS 123668 / FGSC 9935 / NRRL 34936) OX=426428 GN=FOXG_00736 PE=3 SV=1	2	2	0.0595	28284.5	10.88
$579-1	tr|A0A0D2XA46|A0A0D2XA46_FUSO4 Uncharacterized protein OS=Fusarium oxysporum f. sp. lycopersici (strain 4287 / CBS 123668 / FGSC 9935 / NRRL 34936) OX=426428 PE=4 SV=1	2	2	0.012	156447	4.86
$579-2	tr|A0A0J9U732|A0A0J9U732_FUSO4 Uncharacterized protein OS=Fusarium oxysporum f. sp. lycopersici (strain 4287 / CBS 123668 / FGSC 9935 / NRRL 34936) OX=426428 GN=FOXG_00761 PE=4 SV=1	2	2	0.0109	173011	4.92
$580-1	tr|A0A0D2XAD1|A0A0D2XAD1_FUSO4 Uncharacterized protein OS=Fusarium oxysporum f. sp. lycopersici (strain 4287 / CBS 123668 / FGSC 9935 / NRRL 34936) OX=426428 GN=FOXG_00846 PE=4 SV=1	2	2	0.0613	33574.3	5.24
$581-1	tr|A0A0D2XAF6|A0A0D2XAF6_FUSO4 Uncharacterized protein OS=Fusarium oxysporum f. sp. lycopersici (strain 4287 / CBS 123668 / FGSC 9935 / NRRL 34936) OX=426428 GN=FOXG_00871 PE=4 SV=1	2	2	0.071	39344.2	5.34
$582-1	tr|A0A0D2XAK3|A0A0D2XAK3_FUSO4 Syntaxin 1B/2/3 OS=Fusarium oxysporum f. sp. lycopersici (strain 4287 / CBS 123668 / FGSC 9935 / NRRL 34936) OX=426428 GN=FOXG_00919 PE=4 SV=1	2	2	0.0741	41438.2	7.7
$582-2	tr|A0A0J9UB36|A0A0J9UB36_FUSO4 Syntaxin 1B/2/3 OS=Fusarium oxysporum f. sp. lycopersici (strain 4287 / CBS 123668 / FGSC 9935 / NRRL 34936) OX=426428 GN=FOXG_00919 PE=4 SV=1	2	2	0.0745	41267.9	7.7
$582-3	tr|A0A0J9U8Z5|A0A0J9U8Z5_FUSO4 Syntaxin 1B/2/3 OS=Fusarium oxysporum f. sp. lycopersici (strain 4287 / CBS 123668 / FGSC 9935 / NRRL 34936) OX=426428 GN=FOXG_00919 PE=4 SV=1	2	2	0.0841	36974.6	8.95
$583-1	tr|A0A0D2XAL7|A0A0D2XAL7_FUSO4 Uncharacterized protein OS=Fusarium oxysporum f. sp. lycopersici (strain 4287 / CBS 123668 / FGSC 9935 / NRRL 34936) OX=426428 GN=FOXG_00933 PE=4 SV=1	2	2	0.0147	110827	8.8
$584-1	tr|A0A0D2XB48|A0A0D2XB48_FUSO4 26S proteasome regulatory subunit RPN11 OS=Fusarium oxysporum f. sp. lycopersici (strain 4287 / CBS 123668 / FGSC 9935 / NRRL 34936) OX=426428 GN=FOXG_01115 PE=3 SV=1	2	2	0.0475	37717.7	5.7
$584-2	tr|A0A0J9WGU0|A0A0J9WGU0_FUSO4 26S proteasome regulatory subunit RPN11 OS=Fusarium oxysporum f. sp. lycopersici (strain 4287 / CBS 123668 / FGSC 9935 / NRRL 34936) OX=426428 GN=FOXG_01115 PE=3 SV=1	2	2	0.0544	33297.8	5.72
$585-1	tr|A0A0D2XBZ7|A0A0D2XBZ7_FUSO4 GTP-binding protein rhb1 OS=Fusarium oxysporum f. sp. lycopersici (strain 4287 / CBS 123668 / FGSC 9935 / NRRL 34936) OX=426428 GN=FOXG_01420 PE=4 SV=1	2	2	0.1129	20721.4	6.9
$585-2	tr|A0A0J9UDB2|A0A0J9UDB2_FUSO4 GTP-binding protein rhb1 OS=Fusarium oxysporum f. sp. lycopersici (strain 4287 / CBS 123668 / FGSC 9935 / NRRL 34936) OX=426428 GN=FOXG_01420 PE=4 SV=1	2	2	0.1489	15751.7	5.38
$586-1	tr|A0A0D2XC11|A0A0D2XC11_FUSO4 Dynamin GTPase OS=Fusarium oxysporum f. sp. lycopersici (strain 4287 / CBS 123668 / FGSC 9935 / NRRL 34936) OX=426428 GN=FOXG_01434 PE=3 SV=1	2	2	0.0196	101620	8.53
$587-1	tr|A0A0D2XC18|A0A0D2XC18_FUSO4 Uncharacterized protein OS=Fusarium oxysporum f. sp. lycopersici (strain 4287 / CBS 123668 / FGSC 9935 / NRRL 34936) OX=426428 GN=FOXG_01441 PE=4 SV=1	2	2	0.0669	33864.1	9.87
$588-1	tr|A0A0D2XC27|A0A0D2XC27_FUSO4 Uncharacterized protein OS=Fusarium oxysporum f. sp. lycopersici (strain 4287 / CBS 123668 / FGSC 9935 / NRRL 34936) OX=426428 GN=FOXG_01450 PE=3 SV=1	2	2	0.1132	25290	8.77
$589-1	tr|A0A0D2XC37|A0A0D2XC37_FUSO4 Uncharacterized protein OS=Fusarium oxysporum f. sp. lycopersici (strain 4287 / CBS 123668 / FGSC 9935 / NRRL 34936) OX=426428 PE=3 SV=1	2	2	0.0498	66047.4	5.06
$589-2	tr|A0A0J9UAV0|A0A0J9UAV0_FUSO4 AP-3 complex subunit delta OS=Fusarium oxysporum f. sp. lycopersici (strain 4287 / CBS 123668 / FGSC 9935 / NRRL 34936) OX=426428 GN=FOXG_01460 PE=3 SV=1	2	2	0.0315	105054	5.45
$590-1	tr|A0A0D2XC39|A0A0D2XC39_FUSO4 ER membrane protein complex subunit 2 OS=Fusarium oxysporum f. sp. lycopersici (strain 4287 / CBS 123668 / FGSC 9935 / NRRL 34936) OX=426428 GN=FOXG_01462 PE=3 SV=1	2	2	0.0432	36274.9	5.07
$591-1	tr|A0A0D2XC42|A0A0D2XC42_FUSO4 Uncharacterized protein OS=Fusarium oxysporum f. sp. lycopersici (strain 4287 / CBS 123668 / FGSC 9935 / NRRL 34936) OX=426428 GN=FOXG_01465 PE=4 SV=1	2	2	0.0204	80467.9	9.41
$592-1	tr|A0A0D2XCB2|A0A0D2XCB2_FUSO4 ABC transporter domain-containing protein OS=Fusarium oxysporum f. sp. lycopersici (strain 4287 / CBS 123668 / FGSC 9935 / NRRL 34936) OX=426428 PE=3 SV=1	2	2	0.0164	121546	5.81
$592-2	tr|A0A0J9UBN4|A0A0J9UBN4_FUSO4 ABC transporter OS=Fusarium oxysporum f. sp. lycopersici (strain 4287 / CBS 123668 / FGSC 9935 / NRRL 34936) OX=426428 GN=FOXG_01535 PE=3 SV=1	2	2	0.0117	170782	5.6
$593-1	tr|A0A0D2XCH4|A0A0D2XCH4_FUSO4 Replication factor C subunit 4 OS=Fusarium oxysporum f. sp. lycopersici (strain 4287 / CBS 123668 / FGSC 9935 / NRRL 34936) OX=426428 GN=FOXG_01597 PE=3 SV=1	2	2	0.048	39296.8	8.41
$594-1	tr|A0A0D2XCP6|A0A0D2XCP6_FUSO4 Uncharacterized protein OS=Fusarium oxysporum f. sp. lycopersici (strain 4287 / CBS 123668 / FGSC 9935 / NRRL 34936) OX=426428 GN=FOXG_01669 PE=3 SV=1	2	2	0.0331	76770.1	8.86
$594-2	tr|A0A0J9UCC7|A0A0J9UCC7_FUSO4 EF-hand domain-containing protein OS=Fusarium oxysporum f. sp. lycopersici (strain 4287 / CBS 123668 / FGSC 9935 / NRRL 34936) OX=426428 GN=FOXG_01669 PE=3 SV=1	2	2	0.0436	57684.9	9.45
$595-1	tr|A0A0D2XD75|A0A0D2XD75_FUSO4 Uncharacterized protein OS=Fusarium oxysporum f. sp. lycopersici (strain 4287 / CBS 123668 / FGSC 9935 / NRRL 34936) OX=426428 GN=FOXG_01850 PE=4 SV=1	2	2	0.023	67934.2	9.89
$596-1	tr|A0A0D2XDD1|A0A0D2XDD1_FUSO4 NADH dehydrogenase (Ubiquinone) Fe-S protein 6 OS=Fusarium oxysporum f. sp. lycopersici (strain 4287 / CBS 123668 / FGSC 9935 / NRRL 34936) OX=426428 GN=FOXG_01910 PE=4 SV=1	2	2	0.122	18135.2	8.96
$597-1	tr|A0A0D2XDF1|A0A0D2XDF1_FUSO4 Uncharacterized protein OS=Fusarium oxysporum f. sp. lycopersici (strain 4287 / CBS 123668 / FGSC 9935 / NRRL 34936) OX=426428 GN=FOXG_01930 PE=4 SV=1	2	2	0.0249	69693.7	8.01
$598-1	tr|A0A0D2XDI2|A0A0D2XDI2_FUSO4 MICOS complex subunit OS=Fusarium oxysporum f. sp. lycopersici (strain 4287 / CBS 123668 / FGSC 9935 / NRRL 34936) OX=426428 GN=FOXG_01962 PE=4 SV=1	2	2	0.08	27107.7	6.54
$599-1	tr|A0A0D2XDK0|A0A0D2XDK0_FUSO4 Uncharacterized protein OS=Fusarium oxysporum f. sp. lycopersici (strain 4287 / CBS 123668 / FGSC 9935 / NRRL 34936) OX=426428 GN=FOXG_01980 PE=3 SV=1	2	2	0.1563	11118.4	9.91
$600-1	tr|A0A0D2XDM8|A0A0D2XDM8_FUSO4 AFG3 family protein OS=Fusarium oxysporum f. sp. lycopersici (strain 4287 / CBS 123668 / FGSC 9935 / NRRL 34936) OX=426428 GN=FOXG_02008 PE=3 SV=1	2	2	0.0303	98287.8	8.26
$601-1	tr|A0A0D2XDP3|A0A0D2XDP3_FUSO4 Signal peptidase subunit 3 OS=Fusarium oxysporum f. sp. lycopersici (strain 4287 / CBS 123668 / FGSC 9935 / NRRL 34936) OX=426428 GN=FOXG_02023 PE=3 SV=1	2	2	0.058	25456.8	9.78
$602-1	tr|A0A0D2XDZ9|A0A0D2XDZ9_FUSO4 Uncharacterized protein OS=Fusarium oxysporum f. sp. lycopersici (strain 4287 / CBS 123668 / FGSC 9935 / NRRL 34936) OX=426428 GN=FOXG_02130 PE=3 SV=1	2	2	0.083	25959.1	11.44
$603-1	tr|A0A0D2XE44|A0A0D2XE44_FUSO4 GTP-binding protein 128up OS=Fusarium oxysporum f. sp. lycopersici (strain 4287 / CBS 123668 / FGSC 9935 / NRRL 34936) OX=426428 GN=FOXG_02175 PE=4 SV=1	2	2	0.1134	26052.7	9.23
$604-1	tr|A0A0D2XE50|A0A0D2XE50_FUSO4 Guanine nucleotide-binding protein subunit gamma OS=Fusarium oxysporum f. sp. lycopersici (strain 4287 / CBS 123668 / FGSC 9935 / NRRL 34936) OX=426428 GN=FOXG_02181 PE=4 SV=1	2	2	0.1505	10446.8	8.88
$605-1	tr|A0A0D2XEA0|A0A0D2XEA0_FUSO4 L51_S25_CI-B8 domain-containing protein OS=Fusarium oxysporum f. sp. lycopersici (strain 4287 / CBS 123668 / FGSC 9935 / NRRL 34936) OX=426428 GN=FOXG_02232 PE=3 SV=1	2	2	0.1095	15134.5	10.02
$606-1	tr|A0A0D2XED0|A0A0D2XED0_FUSO4 DnaJ like subfamily C member 7 OS=Fusarium oxysporum f. sp. lycopersici (strain 4287 / CBS 123668 / FGSC 9935 / NRRL 34936) OX=426428 GN=FOXG_02262 PE=4 SV=1	2	2	0.0187	76480.7	8.93
$607-1	tr|A0A0D2XEP9|A0A0D2XEP9_FUSO4 Uncharacterized protein OS=Fusarium oxysporum f. sp. lycopersici (strain 4287 / CBS 123668 / FGSC 9935 / NRRL 34936) OX=426428 GN=FOXG_02385 PE=3 SV=1	2	2	0.0451	57109.1	7.24
$608-1	tr|A0A0D2XEX2|A0A0D2XEX2_FUSO4 RNA-dependent RNA polymerase OS=Fusarium oxysporum f. sp. lycopersici (strain 4287 / CBS 123668 / FGSC 9935 / NRRL 34936) OX=426428 PE=3 SV=1	2	2	0.013	148849	8.48
$608-2	tr|A0A0J9WI66|A0A0J9WI66_FUSO4 RNA-dependent RNA polymerase OS=Fusarium oxysporum f. sp. lycopersici (strain 4287 / CBS 123668 / FGSC 9935 / NRRL 34936) OX=426428 GN=FOXG_02461 PE=3 SV=1	2	2	0.0123	157246	8.12
$609-1	tr|A0A0D2XEX4|A0A0D2XEX4_FUSO4 Serine/threonine-protein kinase RIO1 OS=Fusarium oxysporum f. sp. lycopersici (strain 4287 / CBS 123668 / FGSC 9935 / NRRL 34936) OX=426428 GN=FOXG_02463 PE=3 SV=1	2	2	0.0313	61876.1	5.29
$610-1	tr|A0A0D2XFU1|A0A0D2XFU1_FUSO4 Uncharacterized protein OS=Fusarium oxysporum f. sp. lycopersici (strain 4287 / CBS 123668 / FGSC 9935 / NRRL 34936) OX=426428 GN=FOXG_02780 PE=4 SV=1	2	2	0.0881	25660	9.42
$611-1	tr|A0A0D2XFW9|A0A0D2XFW9_FUSO4 MFS domain-containing protein OS=Fusarium oxysporum f. sp. lycopersici (strain 4287 / CBS 123668 / FGSC 9935 / NRRL 34936) OX=426428 GN=FOXG_02808 PE=3 SV=1	2	2	0.0305	61253.1	6.17
$612-1	tr|A0A0D2XG08|A0A0D2XG08_FUSO4 Uncharacterized protein OS=Fusarium oxysporum f. sp. lycopersici (strain 4287 / CBS 123668 / FGSC 9935 / NRRL 34936) OX=426428 GN=FOXG_02847 PE=4 SV=1	2	2	0.0284	68003.1	6.57
$613-1	tr|A0A0D2XGE3|A0A0D2XGE3_FUSO4 Omp85 domain-containing protein OS=Fusarium oxysporum f. sp. lycopersici (strain 4287 / CBS 123668 / FGSC 9935 / NRRL 34936) OX=426428 GN=FOXG_02986 PE=4 SV=1	2	2	0.0533	55728.2	8.44
$614-1	tr|A0A0D2XGP4|A0A0D2XGP4_FUSO4 Septin-type G domain-containing protein OS=Fusarium oxysporum f. sp. lycopersici (strain 4287 / CBS 123668 / FGSC 9935 / NRRL 34936) OX=426428 GN=FOXG_03088 PE=3 SV=1	2	2	0.0345	58742.9	6.33
$615-1	tr|A0A0D2XGY4|A0A0D2XGY4_FUSO4 Cytochrome-b5 reductase OS=Fusarium oxysporum f. sp. lycopersici (strain 4287 / CBS 123668 / FGSC 9935 / NRRL 34936) OX=426428 GN=FOXG_03180 PE=3 SV=1	2	2	0.1348	15256.6	4.48
$616-1	tr|A0A0D2XHI3|A0A0D2XHI3_FUSO4 Mitochondrial pyruvate carrier OS=Fusarium oxysporum f. sp. lycopersici (strain 4287 / CBS 123668 / FGSC 9935 / NRRL 34936) OX=426428 GN=FOXG_03381 PE=3 SV=1	2	2	0.1073	20037	10.28
$617-1	tr|A0A0D2XHL0|A0A0D2XHL0_FUSO4 V-type proton ATPase subunit E OS=Fusarium oxysporum f. sp. lycopersici (strain 4287 / CBS 123668 / FGSC 9935 / NRRL 34936) OX=426428 GN=FOXG_03408 PE=3 SV=1	2	2	0.0917	25861.2	6.7
$618-1	tr|A0A0D2XHL6|A0A0D2XHL6_FUSO4 Uncharacterized protein OS=Fusarium oxysporum f. sp. lycopersici (strain 4287 / CBS 123668 / FGSC 9935 / NRRL 34936) OX=426428 GN=FOXG_03414 PE=4 SV=1	2	2	0.014	126160	9
$618-2	tr|A0A0J9UMX6|A0A0J9UMX6_FUSO4 Uncharacterized protein OS=Fusarium oxysporum f. sp. lycopersici (strain 4287 / CBS 123668 / FGSC 9935 / NRRL 34936) OX=426428 GN=FOXG_03414 PE=4 SV=1	2	2	0.0185	95047.5	8.37
$618-3	tr|A0A0J9WJ18|A0A0J9WJ18_FUSO4 Uncharacterized protein OS=Fusarium oxysporum f. sp. lycopersici (strain 4287 / CBS 123668 / FGSC 9935 / NRRL 34936) OX=426428 GN=FOXG_03414 PE=4 SV=1	2	2	0.0207	86216.4	6.25
$618-4	tr|A0A0J9UKV5|A0A0J9UKV5_FUSO4 Uncharacterized protein OS=Fusarium oxysporum f. sp. lycopersici (strain 4287 / CBS 123668 / FGSC 9935 / NRRL 34936) OX=426428 GN=FOXG_03414 PE=4 SV=1	2	2	0.0157	112222	8.74
$618-5	tr|A0A0J9UKW0|A0A0J9UKW0_FUSO4 Uncharacterized protein OS=Fusarium oxysporum f. sp. lycopersici (strain 4287 / CBS 123668 / FGSC 9935 / NRRL 34936) OX=426428 GN=FOXG_03414 PE=4 SV=1	2	2	0.0258	69042	5.79
$618-6	tr|A0A0J9UJ69|A0A0J9UJ69_FUSO4 Uncharacterized protein OS=Fusarium oxysporum f. sp. lycopersici (strain 4287 / CBS 123668 / FGSC 9935 / NRRL 34936) OX=426428 GN=FOXG_03414 PE=4 SV=1	2	2	0.0179	100154	7
$619-1	tr|A0A0D2XHL8|A0A0D2XHL8_FUSO4 Pre-rRNA-processing protein OS=Fusarium oxysporum f. sp. lycopersici (strain 4287 / CBS 123668 / FGSC 9935 / NRRL 34936) OX=426428 GN=FOXG_03416 PE=3 SV=1	2	2	0.0497	37860.4	8.35
$620-1	tr|A0A0D2XI45|A0A0D2XI45_FUSO4 Uncharacterized protein OS=Fusarium oxysporum f. sp. lycopersici (strain 4287 / CBS 123668 / FGSC 9935 / NRRL 34936) OX=426428 GN=FOXG_03595 PE=4 SV=1	2	2	0.0817	39503.3	5.91
$621-1	tr|A0A0D2XI51|A0A0D2XI51_FUSO4 TRP_N domain-containing protein OS=Fusarium oxysporum f. sp. lycopersici (strain 4287 / CBS 123668 / FGSC 9935 / NRRL 34936) OX=426428 PE=3 SV=1	2	2	0.0211	99875	7
$622-1	tr|A0A0D2XI55|A0A0D2XI55_FUSO4 Translation machinery-associated protein 22 OS=Fusarium oxysporum f. sp. lycopersici (strain 4287 / CBS 123668 / FGSC 9935 / NRRL 34936) OX=426428 GN=FOXG_03605 PE=3 SV=1	2	2	0.1667	13095.8	8.63
$623-1	tr|A0A0D2XI63|A0A0D2XI63_FUSO4 Cytochrome c oxidase subunit 6a OS=Fusarium oxysporum f. sp. lycopersici (strain 4287 / CBS 123668 / FGSC 9935 / NRRL 34936) OX=426428 GN=FOXG_03613 PE=3 SV=1	2	2	0.1417	15048.7	9.07
$623-2	tr|A0A0J9UKA0|A0A0J9UKA0_FUSO4 Cytochrome c oxidase subunit 6a OS=Fusarium oxysporum f. sp. lycopersici (strain 4287 / CBS 123668 / FGSC 9935 / NRRL 34936) OX=426428 GN=FOXG_03613 PE=3 SV=1	2	2	0.1593	13312.9	9.41
$624-1	tr|A0A0D2XI67|A0A0D2XI67_FUSO4 ENTH domain-containing protein OS=Fusarium oxysporum f. sp. lycopersici (strain 4287 / CBS 123668 / FGSC 9935 / NRRL 34936) OX=426428 GN=FOXG_03618 PE=4 SV=1	2	2	0.0447	82812.5	5.52
$625-1	tr|A0A0D2XIG1|A0A0D2XIG1_FUSO4 C2H2-type domain-containing protein OS=Fusarium oxysporum f. sp. lycopersici (strain 4287 / CBS 123668 / FGSC 9935 / NRRL 34936) OX=426428 GN=FOXG_03714 PE=4 SV=1	2	2	0.1429	13516.2	9.3
$626-1	tr|A0A0D2XIH3|A0A0D2XIH3_FUSO4 Uncharacterized protein OS=Fusarium oxysporum f. sp. lycopersici (strain 4287 / CBS 123668 / FGSC 9935 / NRRL 34936) OX=426428 GN=FOXG_03728 PE=3 SV=1	2	2	0.0116	162626	5.24
$627-1	tr|A0A0D2XIH4|A0A0D2XIH4_FUSO4 Coatomer subunit alpha OS=Fusarium oxysporum f. sp. lycopersici (strain 4287 / CBS 123668 / FGSC 9935 / NRRL 34936) OX=426428 GN=FOXG_03729 PE=4 SV=1	2	2	0.0197	136188	6.03
$628-1	tr|A0A0D2XIP4|A0A0D2XIP4_FUSO4 Helo_like_N domain-containing protein OS=Fusarium oxysporum f. sp. lycopersici (strain 4287 / CBS 123668 / FGSC 9935 / NRRL 34936) OX=426428 PE=4 SV=1	2	2	0.0566	35304.2	5.26
$628-2	tr|A0A0J9UL68|A0A0J9UL68_FUSO4 Helo_like_N domain-containing protein OS=Fusarium oxysporum f. sp. lycopersici (strain 4287 / CBS 123668 / FGSC 9935 / NRRL 34936) OX=426428 GN=FOXG_03801 PE=4 SV=1	2	2	0.0354	56345.6	5.73
$629-1	tr|A0A0D2XJF0|A0A0D2XJF0_FUSO4 Uncharacterized protein OS=Fusarium oxysporum f. sp. lycopersici (strain 4287 / CBS 123668 / FGSC 9935 / NRRL 34936) OX=426428 GN=FOXG_04060 PE=4 SV=1	2	2	0.0473	36698.5	7.71
$630-1	tr|A0A0D2XJT9|A0A0D2XJT9_FUSO4 Uncharacterized protein OS=Fusarium oxysporum f. sp. lycopersici (strain 4287 / CBS 123668 / FGSC 9935 / NRRL 34936) OX=426428 GN=FOXG_04205 PE=4 SV=1	2	2	0.0271	66010.6	10.06
$630-2	tr|A0A0J9URE5|A0A0J9URE5_FUSO4 Uncharacterized protein OS=Fusarium oxysporum f. sp. lycopersici (strain 4287 / CBS 123668 / FGSC 9935 / NRRL 34936) OX=426428 GN=FOXG_04205 PE=4 SV=1	2	2	0.0337	52748.2	9.93
$631-1	tr|A0A0D2XJW8|A0A0D2XJW8_FUSO4 Signal recognition particle subunit SRP72 OS=Fusarium oxysporum f. sp. lycopersici (strain 4287 / CBS 123668 / FGSC 9935 / NRRL 34936) OX=426428 GN=FOXG_04234 PE=3 SV=1	2	2	0.0217	69990.6	9
$632-1	tr|A0A0D2XKE1|A0A0D2XKE1_FUSO4 CFEM domain-containing protein OS=Fusarium oxysporum f. sp. lycopersici (strain 4287 / CBS 123668 / FGSC 9935 / NRRL 34936) OX=426428 GN=FOXG_04415 PE=3 SV=1	2	2	0.1333	19362.8	4.62
$633-1	tr|A0A0D2XKG7|A0A0D2XKG7_FUSO4 Uncharacterized protein OS=Fusarium oxysporum f. sp. lycopersici (strain 4287 / CBS 123668 / FGSC 9935 / NRRL 34936) OX=426428 GN=FOXG_04441 PE=4 SV=1	2	2	0.0656	34188.4	6.57
$634-1	tr|A0A0D2XLD9|A0A0D2XLD9_FUSO4 Uncharacterized protein OS=Fusarium oxysporum f. sp. lycopersici (strain 4287 / CBS 123668 / FGSC 9935 / NRRL 34936) OX=426428 PE=4 SV=1	2	2	0.0144	112807	5.54
$634-2	tr|A0A0J9URE6|A0A0J9URE6_FUSO4 Uncharacterized protein OS=Fusarium oxysporum f. sp. lycopersici (strain 4287 / CBS 123668 / FGSC 9935 / NRRL 34936) OX=426428 GN=FOXG_04763 PE=4 SV=1	2	2	0.012	136415	5.96
$635-1	tr|A0A0D2XM45|A0A0D2XM45_FUSO4 Protein kinase domain-containing protein OS=Fusarium oxysporum f. sp. lycopersici (strain 4287 / CBS 123668 / FGSC 9935 / NRRL 34936) OX=426428 PE=4 SV=1	2	2	0.0109	141001	5.94
$636-1	tr|A0A0D2XM54|A0A0D2XM54_FUSO4 Vesicle-associated membrane protein-associated protein B OS=Fusarium oxysporum f. sp. lycopersici (strain 4287 / CBS 123668 / FGSC 9935 / NRRL 34936) OX=426428 GN=FOXG_05029 PE=4 SV=1	2	2	0.0586	31666.3	5.49
$637-1	tr|A0A0D2XM79|A0A0D2XM79_FUSO4 Isocitrate dehydrogenase [NADP] OS=Fusarium oxysporum f. sp. lycopersici (strain 4287 / CBS 123668 / FGSC 9935 / NRRL 34936) OX=426428 GN=FOXG_05055 PE=3 SV=1	2	2	0.039	51771.7	8.19
$638-1	tr|A0A0D2XMD2|A0A0D2XMD2_FUSO4 NADH dehydrogenase OS=Fusarium oxysporum f. sp. lycopersici (strain 4287 / CBS 123668 / FGSC 9935 / NRRL 34936) OX=426428 GN=FOXG_05109 PE=4 SV=1	2	2	0.0789	20746.1	7.79
$638-2	tr|A0A0J9URY3|A0A0J9URY3_FUSO4 NADH dehydrogenase OS=Fusarium oxysporum f. sp. lycopersici (strain 4287 / CBS 123668 / FGSC 9935 / NRRL 34936) OX=426428 GN=FOXG_05109 PE=4 SV=1	2	2	0.0955	17151	5.42
$639-1	tr|A0A0D2XMM9|A0A0D2XMM9_FUSO4 Nuclear pore complex protein Nup85 OS=Fusarium oxysporum f. sp. lycopersici (strain 4287 / CBS 123668 / FGSC 9935 / NRRL 34936) OX=426428 PE=3 SV=1	2	2	0.0163	109525	4.59
$639-2	tr|A0A0J9WKL4|A0A0J9WKL4_FUSO4 Nuclear pore complex protein Nup85 OS=Fusarium oxysporum f. sp. lycopersici (strain 4287 / CBS 123668 / FGSC 9935 / NRRL 34936) OX=426428 GN=FOXG_05206 PE=3 SV=1	2	2	0.0147	121279	4.67
$640-1	tr|A0A0D2XMU1|A0A0D2XMU1_FUSO4 Tryptophanyl-tRNA synthetase OS=Fusarium oxysporum f. sp. lycopersici (strain 4287 / CBS 123668 / FGSC 9935 / NRRL 34936) OX=426428 GN=FOXG_05268 PE=3 SV=1	2	2	0.0466	51190.3	6.49
$641-1	tr|A0A0D2XMW5|A0A0D2XMW5_FUSO4 Protein Ras-2 OS=Fusarium oxysporum f. sp. lycopersici (strain 4287 / CBS 123668 / FGSC 9935 / NRRL 34936) OX=426428 GN=FOXG_05293 PE=4 SV=1	2	2	0.0809	26403.6	9.18
$642-1	tr|A0A0D2XMZ0|A0A0D2XMZ0_FUSO4 ENDO3c domain-containing protein OS=Fusarium oxysporum f. sp. lycopersici (strain 4287 / CBS 123668 / FGSC 9935 / NRRL 34936) OX=426428 PE=4 SV=1	2	2	0.0284	42641.6	9.81
$642-2	tr|A0A0J9UVD1|A0A0J9UVD1_FUSO4 DNA-3-methyladenine glycosylase II OS=Fusarium oxysporum f. sp. lycopersici (strain 4287 / CBS 123668 / FGSC 9935 / NRRL 34936) OX=426428 GN=FOXG_05318 PE=4 SV=1	2	2	0.0278	43496.6	9.77
$643-1	tr|A0A0D2XN44|A0A0D2XN44_FUSO4 U3 small nucleolar ribonucleoprotein protein MPP10 OS=Fusarium oxysporum f. sp. lycopersici (strain 4287 / CBS 123668 / FGSC 9935 / NRRL 34936) OX=426428 PE=3 SV=1	2	2	0.0197	78431.1	4.4
$643-2	tr|A0A0J9USG2|A0A0J9USG2_FUSO4 U3 small nucleolar ribonucleoprotein protein MPP10 OS=Fusarium oxysporum f. sp. lycopersici (strain 4287 / CBS 123668 / FGSC 9935 / NRRL 34936) OX=426428 GN=FOXG_05373 PE=3 SV=1	2	2	0.0192	80582.5	4.41
$644-1	tr|A0A0D2XNC6|A0A0D2XNC6_FUSO4 Uncharacterized protein OS=Fusarium oxysporum f. sp. lycopersici (strain 4287 / CBS 123668 / FGSC 9935 / NRRL 34936) OX=426428 PE=3 SV=1	2	2	0.011	153223	6.35
$644-2	tr|A0A0J9WKV6|A0A0J9WKV6_FUSO4 Uncharacterized protein OS=Fusarium oxysporum f. sp. lycopersici (strain 4287 / CBS 123668 / FGSC 9935 / NRRL 34936) OX=426428 GN=FOXG_05456 PE=3 SV=1	2	2	0.0109	154930	6.4
$645-1	tr|A0A0D2XNC9|A0A0D2XNC9_FUSO4 PKS_AT domain-containing protein OS=Fusarium oxysporum f. sp. lycopersici (strain 4287 / CBS 123668 / FGSC 9935 / NRRL 34936) OX=426428 PE=4 SV=1	2	2	0.0333	36686.7	5.72
$645-2	tr|A0A0J9UU01|A0A0J9UU01_FUSO4 [acyl-carrier-protein] S-malonyltransferase OS=Fusarium oxysporum f. sp. lycopersici (strain 4287 / CBS 123668 / FGSC 9935 / NRRL 34936) OX=426428 GN=FOXG_05459 PE=4 SV=1	2	2	0.0256	48174.6	6.85
$646-1	tr|A0A0D2XNG1|A0A0D2XNG1_FUSO4 Mitochondrial outer membrane protein porin OS=Fusarium oxysporum f. sp. lycopersici (strain 4287 / CBS 123668 / FGSC 9935 / NRRL 34936) OX=426428 GN=FOXG_05491 PE=4 SV=1	2	2	0.0848	29815.2	8.8
$647-1	tr|A0A0D2XNJ9|A0A0D2XNJ9_FUSO4 Trehalase OS=Fusarium oxysporum f. sp. lycopersici (strain 4287 / CBS 123668 / FGSC 9935 / NRRL 34936) OX=426428 PE=3 SV=1	2	2	0.0336	72224.8	6.65
$647-2	tr|A0A0J9UWC7|A0A0J9UWC7_FUSO4 Trehalase OS=Fusarium oxysporum f. sp. lycopersici (strain 4287 / CBS 123668 / FGSC 9935 / NRRL 34936) OX=426428 GN=FOXG_05530 PE=3 SV=1	2	2	0.0297	81736.7	6.22
$648-1	tr|A0A0D2XNL9|A0A0D2XNL9_FUSO4 Uncharacterized protein OS=Fusarium oxysporum f. sp. lycopersici (strain 4287 / CBS 123668 / FGSC 9935 / NRRL 34936) OX=426428 GN=FOXG_05550 PE=4 SV=1	2	2	0.0148	120696	6.38
$649-1	tr|A0A0D2XNQ8|A0A0D2XNQ8_FUSO4 Uncharacterized protein OS=Fusarium oxysporum f. sp. lycopersici (strain 4287 / CBS 123668 / FGSC 9935 / NRRL 34936) OX=426428 PE=4 SV=1	2	2	0.0348	56154.9	8.17
$650-1	tr|A0A0D2XPC8|A0A0D2XPC8_FUSO4 Uncharacterized protein OS=Fusarium oxysporum f. sp. lycopersici (strain 4287 / CBS 123668 / FGSC 9935 / NRRL 34936) OX=426428 PE=4 SV=1	2	2	0.0058	228953	5.73
$650-2	tr|A0A0J9WL70|A0A0J9WL70_FUSO4 Uncharacterized protein OS=Fusarium oxysporum f. sp. lycopersici (strain 4287 / CBS 123668 / FGSC 9935 / NRRL 34936) OX=426428 GN=FOXG_05816 PE=4 SV=1	2	2	0.0053	248299	5.72
$651-1	tr|A0A0D2XPN2|A0A0D2XPN2_FUSO4 Elongation factor 2 OS=Fusarium oxysporum f. sp. lycopersici (strain 4287 / CBS 123668 / FGSC 9935 / NRRL 34936) OX=426428 GN=FOXG_05920 PE=3 SV=1	2	2	0.0122	110055	5
$652-1	tr|A0A0D2XPQ6|A0A0D2XPQ6_FUSO4 Cell division cycle 20-like protein 1, cofactor-APC complex OS=Fusarium oxysporum f. sp. lycopersici (strain 4287 / CBS 123668 / FGSC 9935 / NRRL 34936) OX=426428 GN=FOXG_05944 PE=3 SV=1	2	2	0.0498	43088.5	6.08
$653-1	tr|A0A0D2XPT0|A0A0D2XPT0_FUSO4 Dipeptidyl-peptidase III OS=Fusarium oxysporum f. sp. lycopersici (strain 4287 / CBS 123668 / FGSC 9935 / NRRL 34936) OX=426428 GN=FOXG_05968 PE=4 SV=1	2	2	0.0655	31600.5	4.84
$654-1	tr|A0A0D2XPT9|A0A0D2XPT9_FUSO4 Delta24-sterol reductase OS=Fusarium oxysporum f. sp. lycopersici (strain 4287 / CBS 123668 / FGSC 9935 / NRRL 34936) OX=426428 GN=FOXG_05977 PE=3 SV=1	2	2	0.0388	60876.9	6.62
$655-1	tr|A0A0D2XPV4|A0A0D2XPV4_FUSO4 NADH dehydrogenase [ubiquinone] flavoprotein 1, mitochondrial OS=Fusarium oxysporum f. sp. lycopersici (strain 4287 / CBS 123668 / FGSC 9935 / NRRL 34936) OX=426428 GN=FOXG_05992 PE=3 SV=1	2	2	0.0576	53524.5	8.73
$655-2	tr|A0A0J9UVR1|A0A0J9UVR1_FUSO4 NADH-ubiquinone oxidoreductase 51 kDa subunit, mitochondrial OS=Fusarium oxysporum f. sp. lycopersici (strain 4287 / CBS 123668 / FGSC 9935 / NRRL 34936) OX=426428 GN=FOXG_05992 PE=3 SV=1	2	2	0.0731	42098.4	6.29
$656-1	tr|A0A0D2XQ55|A0A0D2XQ55_FUSO4 Uncharacterized protein OS=Fusarium oxysporum f. sp. lycopersici (strain 4287 / CBS 123668 / FGSC 9935 / NRRL 34936) OX=426428 GN=FOXG_06096 PE=4 SV=1	2	2	0.1342	15883.1	9.87
$657-1	tr|A0A0D2XQD4|A0A0D2XQD4_FUSO4 Uncharacterized protein OS=Fusarium oxysporum f. sp. lycopersici (strain 4287 / CBS 123668 / FGSC 9935 / NRRL 34936) OX=426428 PE=4 SV=1	2	2	0.0309	38539.2	5.09
$657-2	tr|A0A0J9UXC1|A0A0J9UXC1_FUSO4 Uncharacterized protein OS=Fusarium oxysporum f. sp. lycopersici (strain 4287 / CBS 123668 / FGSC 9935 / NRRL 34936) OX=426428 GN=FOXG_06176 PE=4 SV=1	2	2	0.019	62412.4	5.8
$658-1	tr|A0A0D2XQM9|A0A0D2XQM9_FUSO4 Uncharacterized protein OS=Fusarium oxysporum f. sp. lycopersici (strain 4287 / CBS 123668 / FGSC 9935 / NRRL 34936) OX=426428 PE=4 SV=1	2	2	0.0068	296145	5.7
$658-2	tr|A0A0J9UXS9|A0A0J9UXS9_FUSO4 Uncharacterized protein OS=Fusarium oxysporum f. sp. lycopersici (strain 4287 / CBS 123668 / FGSC 9935 / NRRL 34936) OX=426428 GN=FOXG_06277 PE=4 SV=1	2	2	0.0061	330152	5.81
$659-1	tr|A0A0D2XR23|A0A0D2XR23_FUSO4 Uncharacterized protein OS=Fusarium oxysporum f. sp. lycopersici (strain 4287 / CBS 123668 / FGSC 9935 / NRRL 34936) OX=426428 GN=FOXG_06425 PE=4 SV=1	2	2	0.018	105967	5.73
$660-1	tr|A0A0D2XRJ5|A0A0D2XRJ5_FUSO4 Uncharacterized protein OS=Fusarium oxysporum f. sp. lycopersici (strain 4287 / CBS 123668 / FGSC 9935 / NRRL 34936) OX=426428 PE=4 SV=1	2	2	0.0197	72929.2	9.38
$660-2	tr|A0A0J9V6P6|A0A0J9V6P6_FUSO4 Uncharacterized protein OS=Fusarium oxysporum f. sp. lycopersici (strain 4287 / CBS 123668 / FGSC 9935 / NRRL 34936) OX=426428 GN=FOXG_07228 PE=4 SV=1	2	2	0.0223	64035.7	8.89
$660-3	tr|A0A0J9V5U7|A0A0J9V5U7_FUSO4 Uncharacterized protein OS=Fusarium oxysporum f. sp. lycopersici (strain 4287 / CBS 123668 / FGSC 9935 / NRRL 34936) OX=426428 GN=FOXG_06985 PE=4 SV=1	2	2	0.0223	64247	9.26
$660-4	tr|A0A0J9V029|A0A0J9V029_FUSO4 Uncharacterized protein OS=Fusarium oxysporum f. sp. lycopersici (strain 4287 / CBS 123668 / FGSC 9935 / NRRL 34936) OX=426428 GN=FOXG_06597 PE=4 SV=1	2	2	0.0213	67486.6	9
$660-5	tr|A0A0D2XRR0|A0A0D2XRR0_FUSO4 Uncharacterized protein OS=Fusarium oxysporum f. sp. lycopersici (strain 4287 / CBS 123668 / FGSC 9935 / NRRL 34936) OX=426428 PE=4 SV=1	2	2	0.0233	61468.1	9.51
$660-6	tr|A0A0D2XTC6|A0A0D2XTC6_FUSO4 Uncharacterized protein OS=Fusarium oxysporum f. sp. lycopersici (strain 4287 / CBS 123668 / FGSC 9935 / NRRL 34936) OX=426428 PE=4 SV=1	2	2	0.0223	64320.1	9.25
$661-1	tr|A0A0D2XT44|A0A0D2XT44_FUSO4 Uncharacterized protein OS=Fusarium oxysporum f. sp. lycopersici (strain 4287 / CBS 123668 / FGSC 9935 / NRRL 34936) OX=426428 GN=FOXG_07146 PE=4 SV=1	2	2	0.0272	61369.7	5.9
$662-1	tr|A0A0D2XU88|A0A0D2XU88_FUSO4 GTP cyclohydrolase 1 OS=Fusarium oxysporum f. sp. lycopersici (strain 4287 / CBS 123668 / FGSC 9935 / NRRL 34936) OX=426428 GN=FOXG_07540 PE=3 SV=1	2	2	0.0769	35066.8	9.56
$663-1	tr|A0A0D2XUT1|A0A0D2XUT1_FUSO4 Ubiquitin-activating enzyme E1-like OS=Fusarium oxysporum f. sp. lycopersici (strain 4287 / CBS 123668 / FGSC 9935 / NRRL 34936) OX=426428 GN=FOXG_07736 PE=3 SV=1	2	2	0.0175	75595.8	5.31
$663-2	tr|A0A0J9WMF6|A0A0J9WMF6_FUSO4 Ubiquitin-activating enzyme E1-like OS=Fusarium oxysporum f. sp. lycopersici (strain 4287 / CBS 123668 / FGSC 9935 / NRRL 34936) OX=426428 GN=FOXG_07736 PE=3 SV=1	2	2	0.0197	67528	5.44
$663-3	tr|A0A0J9V3L2|A0A0J9V3L2_FUSO4 Ubiquitin-like 1-activating enzyme E1 B OS=Fusarium oxysporum f. sp. lycopersici (strain 4287 / CBS 123668 / FGSC 9935 / NRRL 34936) OX=426428 GN=FOXG_07736 PE=3 SV=1	2	2	0.0194	68990.8	7.78
$663-4	tr|A0A0J9V2B0|A0A0J9V2B0_FUSO4 Ubiquitin-activating enzyme E1-like OS=Fusarium oxysporum f. sp. lycopersici (strain 4287 / CBS 123668 / FGSC 9935 / NRRL 34936) OX=426428 GN=FOXG_07736 PE=3 SV=1	2	2	0.0194	69267	8.09
$664-1	tr|A0A0D2XUT5|A0A0D2XUT5_FUSO4 Uncharacterized protein OS=Fusarium oxysporum f. sp. lycopersici (strain 4287 / CBS 123668 / FGSC 9935 / NRRL 34936) OX=426428 GN=FOXG_07740 PE=3 SV=1	2	2	0.1429	13543.7	10.05
$665-1	tr|A0A0D2XUU2|A0A0D2XUU2_FUSO4 Uncharacterized protein OS=Fusarium oxysporum f. sp. lycopersici (strain 4287 / CBS 123668 / FGSC 9935 / NRRL 34936) OX=426428 GN=FOXG_07749 PE=4 SV=1	2	2	0.0734	28384	6.06
$666-1	tr|A0A0D2XUU4|A0A0D2XUU4_FUSO4 PCI domain-containing protein OS=Fusarium oxysporum f. sp. lycopersici (strain 4287 / CBS 123668 / FGSC 9935 / NRRL 34936) OX=426428 PE=3 SV=1	2	2	0.03	63326.4	6.43
$666-2	tr|A0A0J9V1N7|A0A0J9V1N7_FUSO4 26S proteasome regulatory subunit N3 OS=Fusarium oxysporum f. sp. lycopersici (strain 4287 / CBS 123668 / FGSC 9935 / NRRL 34936) OX=426428 GN=FOXG_07751 PE=3 SV=1	2	2	0.0295	64328.6	6.43
$667-1	tr|A0A0D2XUU9|A0A0D2XUU9_FUSO4 Trehalose-6-phosphate synthase OS=Fusarium oxysporum f. sp. lycopersici (strain 4287 / CBS 123668 / FGSC 9935 / NRRL 34936) OX=426428 GN=FOXG_07756 PE=3 SV=1	2	2	0.0449	59951.3	5.26
$668-1	tr|A0A0D2XUW6|A0A0D2XUW6_FUSO4 DNA polymerase epsilon catalytic subunit OS=Fusarium oxysporum f. sp. lycopersici (strain 4287 / CBS 123668 / FGSC 9935 / NRRL 34936) OX=426428 PE=3 SV=1	2	2	0.0114	239900	7.25
$668-2	tr|A0A0J9V2Y4|A0A0J9V2Y4_FUSO4 DNA polymerase epsilon catalytic subunit OS=Fusarium oxysporum f. sp. lycopersici (strain 4287 / CBS 123668 / FGSC 9935 / NRRL 34936) OX=426428 GN=FOXG_07773 PE=3 SV=1	2	2	0.0169	162497	7.71
$669-1	tr|A0A0D2XV17|A0A0D2XV17_FUSO4 PhoD domain-containing protein OS=Fusarium oxysporum f. sp. lycopersici (strain 4287 / CBS 123668 / FGSC 9935 / NRRL 34936) OX=426428 GN=FOXG_07825 PE=4 SV=1	2	2	0.0303	70224.5	4.97
$670-1	tr|A0A0D2XVH5|A0A0D2XVH5_FUSO4 Uncharacterized protein OS=Fusarium oxysporum f. sp. lycopersici (strain 4287 / CBS 123668 / FGSC 9935 / NRRL 34936) OX=426428 PE=3 SV=1	2	2	0.0296	81354.4	5.83
$671-1	tr|A0A0D2XVJ7|A0A0D2XVJ7_FUSO4 RuvB-like helicase OS=Fusarium oxysporum f. sp. lycopersici (strain 4287 / CBS 123668 / FGSC 9935 / NRRL 34936) OX=426428 GN=FOXG_08009 PE=3 SV=1	2	2	0.0486	51482.3	5.68
$672-1	tr|A0A0D2XVK4|A0A0D2XVK4_FUSO4 Uncharacterized protein OS=Fusarium oxysporum f. sp. lycopersici (strain 4287 / CBS 123668 / FGSC 9935 / NRRL 34936) OX=426428 PE=4 SV=1	2	2	0.1616	10937.5	10.6
$673-1	tr|A0A0D2XVK5|A0A0D2XVK5_FUSO4 Cytochrome c oxidase subunit OS=Fusarium oxysporum f. sp. lycopersici (strain 4287 / CBS 123668 / FGSC 9935 / NRRL 34936) OX=426428 GN=FOXG_08017 PE=3 SV=1	2	2	0.1494	10296.4	6.7
$674-1	tr|A0A0D2XVL1|A0A0D2XVL1_FUSO4 Uncharacterized protein OS=Fusarium oxysporum f. sp. lycopersici (strain 4287 / CBS 123668 / FGSC 9935 / NRRL 34936) OX=426428 PE=4 SV=1	2	2	0.0233	57626.9	9.77
$674-2	tr|A0A0J9V4V4|A0A0J9V4V4_FUSO4 Uncharacterized protein OS=Fusarium oxysporum f. sp. lycopersici (strain 4287 / CBS 123668 / FGSC 9935 / NRRL 34936) OX=426428 GN=FOXG_08023 PE=4 SV=1	2	2	0.0167	79445.3	9.58
$675-1	tr|A0A0D2XVM1|A0A0D2XVM1_FUSO4 Uncharacterized protein OS=Fusarium oxysporum f. sp. lycopersici (strain 4287 / CBS 123668 / FGSC 9935 / NRRL 34936) OX=426428 GN=FOXG_08033 PE=4 SV=1	2	2	0.0417	53997.6	7.16
$675-2	tr|A0A0J9WMP5|A0A0J9WMP5_FUSO4 Uncharacterized protein OS=Fusarium oxysporum f. sp. lycopersici (strain 4287 / CBS 123668 / FGSC 9935 / NRRL 34936) OX=426428 GN=FOXG_08033 PE=4 SV=1	2	2	0.0394	57686.8	6.66
$676-1	tr|A0A0D2XVN1|A0A0D2XVN1_FUSO4 Bromo domain-containing protein OS=Fusarium oxysporum f. sp. lycopersici (strain 4287 / CBS 123668 / FGSC 9935 / NRRL 34936) OX=426428 PE=4 SV=1	2	2	0.0123	125622	5.28
$676-2	tr|A0A0J9V312|A0A0J9V312_FUSO4 Transcriptional activator SPT7 OS=Fusarium oxysporum f. sp. lycopersici (strain 4287 / CBS 123668 / FGSC 9935 / NRRL 34936) OX=426428 GN=FOXG_08043 PE=4 SV=1	2	2	0.0122	126600	5.3
$677-1	tr|A0A0D2XVN9|A0A0D2XVN9_FUSO4 Solute carrier family 25, member 46 OS=Fusarium oxysporum f. sp. lycopersici (strain 4287 / CBS 123668 / FGSC 9935 / NRRL 34936) OX=426428 GN=FOXG_08051 PE=3 SV=1	2	2	0.06	32430.7	9.35
$678-1	tr|A0A0D2XVQ5|A0A0D2XVQ5_FUSO4 Eukaryotic translation initiation factor 3 subunit K OS=Fusarium oxysporum f. sp. lycopersici (strain 4287 / CBS 123668 / FGSC 9935 / NRRL 34936) OX=426428 GN=FOXG_08067 PE=3 SV=1	2	2	0.0996	26065.9	4.54
$679-1	tr|A0A0D2XVT5|A0A0D2XVT5_FUSO4 PP28 domain-containing protein OS=Fusarium oxysporum f. sp. lycopersici (strain 4287 / CBS 123668 / FGSC 9935 / NRRL 34936) OX=426428 GN=FOXG_08097 PE=4 SV=1	2	2	0.0469	28354.3	5.13
$680-1	tr|A0A0D2XW00|A0A0D2XW00_FUSO4 Uncharacterized protein OS=Fusarium oxysporum f. sp. lycopersici (strain 4287 / CBS 123668 / FGSC 9935 / NRRL 34936) OX=426428 GN=FOXG_08164 PE=3 SV=1	2	2	0.1071	19278.7	9.88
$681-1	tr|A0A0D2XW75|A0A0D2XW75_FUSO4 Uncharacterized protein OS=Fusarium oxysporum f. sp. lycopersici (strain 4287 / CBS 123668 / FGSC 9935 / NRRL 34936) OX=426428 GN=FOXG_08239 PE=3 SV=1	2	2	0.1207	19308.6	5.08
$682-1	tr|A0A0D2XW81|A0A0D2XW81_FUSO4 Uncharacterized protein OS=Fusarium oxysporum f. sp. lycopersici (strain 4287 / CBS 123668 / FGSC 9935 / NRRL 34936) OX=426428 GN=FOXG_08245 PE=4 SV=1	2	2	0.0264	63821.7	5.44
$683-1	tr|A0A0D2XWA2|A0A0D2XWA2_FUSO4 Spindle pole body component OS=Fusarium oxysporum f. sp. lycopersici (strain 4287 / CBS 123668 / FGSC 9935 / NRRL 34936) OX=426428 GN=FOXG_08267 PE=3 SV=1	2	2	0.0176	108792	5.25
$684-1	tr|A0A0D2XWE3|A0A0D2XWE3_FUSO4 DNA-directed RNA polymerases I, II, and III subunit RPABC1 OS=Fusarium oxysporum f. sp. lycopersici (strain 4287 / CBS 123668 / FGSC 9935 / NRRL 34936) OX=426428 GN=FOXG_08309 PE=3 SV=1	2	2	0.0763	27136	9.23
$685-1	tr|A0A0D2XWM4|A0A0D2XWM4_FUSO4 Dihydroorotate oxidase OS=Fusarium oxysporum f. sp. lycopersici (strain 4287 / CBS 123668 / FGSC 9935 / NRRL 34936) OX=426428 GN=FOXG_08390 PE=4 SV=1	2	2	0.0469	50838.1	9.43
$686-1	tr|A0A0D2XWN7|A0A0D2XWN7_FUSO4 Transmembrane 9 superfamily member OS=Fusarium oxysporum f. sp. lycopersici (strain 4287 / CBS 123668 / FGSC 9935 / NRRL 34936) OX=426428 GN=FOXG_08403 PE=3 SV=1	2	2	0.025	72045.2	8.49
$687-1	tr|A0A0D2XWY5|A0A0D2XWY5_FUSO4 GTP-binding protein ypt2 OS=Fusarium oxysporum f. sp. lycopersici (strain 4287 / CBS 123668 / FGSC 9935 / NRRL 34936) OX=426428 GN=FOXG_08501 PE=4 SV=1	2	2	0.1034	22636.4	5.94
$688-1	tr|A0A0D2XX07|A0A0D2XX07_FUSO4 Acyl-CoA desaturase OS=Fusarium oxysporum f. sp. lycopersici (strain 4287 / CBS 123668 / FGSC 9935 / NRRL 34936) OX=426428 GN=FOXG_08523 PE=3 SV=1	2	2	0.0379	53315.3	9.01
$689-1	tr|A0A0D2XXH5|A0A0D2XXH5_FUSO4 Fido domain-containing protein OS=Fusarium oxysporum f. sp. lycopersici (strain 4287 / CBS 123668 / FGSC 9935 / NRRL 34936) OX=426428 PE=4 SV=1	2	2	0.0307	40435.3	6.09
$690-1	tr|A0A0D2XXW6|A0A0D2XXW6_FUSO4 Omega-6 fatty acid desaturase (Delta-12 desaturase) OS=Fusarium oxysporum f. sp. lycopersici (strain 4287 / CBS 123668 / FGSC 9935 / NRRL 34936) OX=426428 GN=FOXG_08835 PE=4 SV=1	2	2	0.0355	53759.8	8.86
$691-1	tr|A0A0D2XYC9|A0A0D2XYC9_FUSO4 Uncharacterized protein OS=Fusarium oxysporum f. sp. lycopersici (strain 4287 / CBS 123668 / FGSC 9935 / NRRL 34936) OX=426428 GN=FOXG_09001 PE=4 SV=1	2	2	0.0363	47113	9.5
$692-1	tr|A0A0D2XYI0|A0A0D2XYI0_FUSO4 DUF676 domain-containing protein OS=Fusarium oxysporum f. sp. lycopersici (strain 4287 / CBS 123668 / FGSC 9935 / NRRL 34936) OX=426428 PE=3 SV=1	2	2	0.0108	146326	7.94
$692-2	tr|A0A0J9VA82|A0A0J9VA82_FUSO4 DUF676 domain-containing protein OS=Fusarium oxysporum f. sp. lycopersici (strain 4287 / CBS 123668 / FGSC 9935 / NRRL 34936) OX=426428 GN=FOXG_09052 PE=3 SV=1	2	2	0.0109	145646	7.94
$693-1	tr|A0A0D2XYJ6|A0A0D2XYJ6_FUSO4 Translation initiation factor IF-3 OS=Fusarium oxysporum f. sp. lycopersici (strain 4287 / CBS 123668 / FGSC 9935 / NRRL 34936) OX=426428 GN=FOXG_09068 PE=3 SV=1	2	2	0.0687	33790	9.41
$694-1	tr|A0A0D2XYL5|A0A0D2XYL5_FUSO4 Phospholipid-transporting ATPase OS=Fusarium oxysporum f. sp. lycopersici (strain 4287 / CBS 123668 / FGSC 9935 / NRRL 34936) OX=426428 GN=FOXG_09087 PE=3 SV=1	2	2	0.0135	176403	8.91
$695-1	tr|A0A0D2XZ25|A0A0D2XZ25_FUSO4 Uncharacterized protein OS=Fusarium oxysporum f. sp. lycopersici (strain 4287 / CBS 123668 / FGSC 9935 / NRRL 34936) OX=426428 GN=FOXG_09247 PE=4 SV=1	2	2	0.0356	52724.5	9.55
$696-1	tr|A0A0D2XZ38|A0A0D2XZ38_FUSO4 DNA-directed RNA polymerase subunit beta OS=Fusarium oxysporum f. sp. lycopersici (strain 4287 / CBS 123668 / FGSC 9935 / NRRL 34936) OX=426428 GN=FOXG_09260 PE=3 SV=1	2	2	0.0195	138007	8.25
$697-1	tr|A0A0D2XZB5|A0A0D2XZB5_FUSO4 Uncharacterized protein OS=Fusarium oxysporum f. sp. lycopersici (strain 4287 / CBS 123668 / FGSC 9935 / NRRL 34936) OX=426428 GN=FOXG_09342 PE=3 SV=1	2	2	0.0478	48962.9	9.98
$698-1	tr|A0A0D2XZC5|A0A0D2XZC5_FUSO4 Multifunctional tryptophan biosynthesis protein OS=Fusarium oxysporum f. sp. lycopersici (strain 4287 / CBS 123668 / FGSC 9935 / NRRL 34936) OX=426428 GN=FOXG_09352 PE=3 SV=1	2	2	0.0184	82576.1	5.92
$699-1	tr|A0A0D2XZG2|A0A0D2XZG2_FUSO4 Kri1_C domain-containing protein OS=Fusarium oxysporum f. sp. lycopersici (strain 4287 / CBS 123668 / FGSC 9935 / NRRL 34936) OX=426428 GN=FOXG_09391 PE=3 SV=1	2	2	0.032	75812.9	5.05
$700-1	tr|A0A0D2XZP2|A0A0D2XZP2_FUSO4 Translation initiation factor 5 OS=Fusarium oxysporum f. sp. lycopersici (strain 4287 / CBS 123668 / FGSC 9935 / NRRL 34936) OX=426428 GN=FOXG_09473 PE=3 SV=1	2	2	0.052	46921	5.28
$701-1	tr|A0A0D2XZP9|A0A0D2XZP9_FUSO4 CMGC/DYRK/YAK protein kinase OS=Fusarium oxysporum f. sp. lycopersici (strain 4287 / CBS 123668 / FGSC 9935 / NRRL 34936) OX=426428 GN=FOXG_09480 PE=4 SV=1	2	2	0.0209	101592	9.42
$702-1	tr|A0A0D2XZR8|A0A0D2XZR8_FUSO4 Uncharacterized protein OS=Fusarium oxysporum f. sp. lycopersici (strain 4287 / CBS 123668 / FGSC 9935 / NRRL 34936) OX=426428 GN=FOXG_09500 PE=3 SV=1	2	2	0.0409	60754.7	5.49
$703-1	tr|A0A0D2Y0B2|A0A0D2Y0B2_FUSO4 Hydrolase_4 domain-containing protein OS=Fusarium oxysporum f. sp. lycopersici (strain 4287 / CBS 123668 / FGSC 9935 / NRRL 34936) OX=426428 GN=FOXG_09700 PE=4 SV=1	2	2	0.063	28631	5.88
$704-1	tr|A0A0D2Y0K6|A0A0D2Y0K6_FUSO4 Mannitol 2-dehydrogenase OS=Fusarium oxysporum f. sp. lycopersici (strain 4287 / CBS 123668 / FGSC 9935 / NRRL 34936) OX=426428 GN=FOXG_09794 PE=3 SV=1	2	2	0.0378	56900.1	5.62
$705-1	tr|A0A0D2Y1C0|A0A0D2Y1C0_FUSO4 MFS transporter, SP family, major inositol transporter OS=Fusarium oxysporum f. sp. lycopersici (strain 4287 / CBS 123668 / FGSC 9935 / NRRL 34936) OX=426428 GN=FOXG_10063 PE=3 SV=1	2	2	0.0366	63947.2	5.7
$706-1	tr|A0A0D2Y1V5|A0A0D2Y1V5_FUSO4 Uncharacterized protein OS=Fusarium oxysporum f. sp. lycopersici (strain 4287 / CBS 123668 / FGSC 9935 / NRRL 34936) OX=426428 GN=FOXG_10248 PE=4 SV=1	2	2	0.0389	53550.7	5.28
$707-1	tr|A0A0D2Y1V9|A0A0D2Y1V9_FUSO4 26S protease regulatory subunit 6A OS=Fusarium oxysporum f. sp. lycopersici (strain 4287 / CBS 123668 / FGSC 9935 / NRRL 34936) OX=426428 GN=FOXG_10252 PE=3 SV=1	2	2	0.0523	50972.4	4.92
$708-1	tr|A0A0D2Y1Y2|A0A0D2Y1Y2_FUSO4 Fructose-bisphosphate aldolase OS=Fusarium oxysporum f. sp. lycopersici (strain 4287 / CBS 123668 / FGSC 9935 / NRRL 34936) OX=426428 GN=FOXG_10275 PE=3 SV=1	2	2	0.0417	39657.3	5.44
$709-1	tr|A0A0D2Y292|A0A0D2Y292_FUSO4 Uncharacterized protein OS=Fusarium oxysporum f. sp. lycopersici (strain 4287 / CBS 123668 / FGSC 9935 / NRRL 34936) OX=426428 GN=FOXG_10386 PE=3 SV=1	2	2	0.0255	58036	6.99
$710-1	tr|A0A0D2Y2C0|A0A0D2Y2C0_FUSO4 D-ser_dehydrat domain-containing protein OS=Fusarium oxysporum f. sp. lycopersici (strain 4287 / CBS 123668 / FGSC 9935 / NRRL 34936) OX=426428 PE=3 SV=1	2	2	0.0311	42366.1	6.57
$710-2	tr|A0A0J9VFE3|A0A0J9VFE3_FUSO4 D-ser_dehydrat domain-containing protein OS=Fusarium oxysporum f. sp. lycopersici (strain 4287 / CBS 123668 / FGSC 9935 / NRRL 34936) OX=426428 GN=FOXG_20295 PE=3 SV=1	2	2	0.0208	62891.1	6.24
$711-1	tr|A0A0D2Y2D5|A0A0D2Y2D5_FUSO4 DNA replication licensing factor MCM6 OS=Fusarium oxysporum f. sp. lycopersici (strain 4287 / CBS 123668 / FGSC 9935 / NRRL 34936) OX=426428 GN=FOXG_10431 PE=3 SV=1	2	2	0.0199	105181	4.96
$712-1	tr|A0A0D2Y2H9|A0A0D2Y2H9_FUSO4 Eukaryotic translation initiation factor 3 subunit L OS=Fusarium oxysporum f. sp. lycopersici (strain 4287 / CBS 123668 / FGSC 9935 / NRRL 34936) OX=426428 GN=FOXG_10476 PE=3 SV=1	2	2	0.0546	55025.8	5.18
$713-1	tr|A0A0D2Y2M1|A0A0D2Y2M1_FUSO4 Uncharacterized protein OS=Fusarium oxysporum f. sp. lycopersici (strain 4287 / CBS 123668 / FGSC 9935 / NRRL 34936) OX=426428 GN=FOXG_10519 PE=3 SV=1	2	2	0.2268	10627.3	4.75
$714-1	tr|A0A0D2Y395|A0A0D2Y395_FUSO4 Purple acid phosphatase OS=Fusarium oxysporum f. sp. lycopersici (strain 4287 / CBS 123668 / FGSC 9935 / NRRL 34936) OX=426428 GN=FOXG_10746 PE=3 SV=1	2	2	0.0306	70207.2	5.55
$715-1	tr|A0A0D2Y3K1|A0A0D2Y3K1_FUSO4 Uncharacterized protein OS=Fusarium oxysporum f. sp. lycopersici (strain 4287 / CBS 123668 / FGSC 9935 / NRRL 34936) OX=426428 PE=4 SV=1	2	2	0.0249	55493.6	8.58
$715-2	tr|A0A0J9WQG0|A0A0J9WQG0_FUSO4 Uncharacterized protein OS=Fusarium oxysporum f. sp. lycopersici (strain 4287 / CBS 123668 / FGSC 9935 / NRRL 34936) OX=426428 GN=FOXG_10852 PE=4 SV=1	2	2	0.0163	84822.8	9
$716-1	tr|A0A0D2Y438|A0A0D2Y438_FUSO4 Uncharacterized protein OS=Fusarium oxysporum f. sp. lycopersici (strain 4287 / CBS 123668 / FGSC 9935 / NRRL 34936) OX=426428 GN=FOXG_11040 PE=4 SV=1	2	2	0.1414	21155.7	9.67
$717-1	tr|A0A0D2Y468|A0A0D2Y468_FUSO4 Uncharacterized protein OS=Fusarium oxysporum f. sp. lycopersici (strain 4287 / CBS 123668 / FGSC 9935 / NRRL 34936) OX=426428 GN=FOXG_11070 PE=4 SV=1	2	2	0.0172	122503	6.26
$718-1	tr|A0A0D2Y480|A0A0D2Y480_FUSO4 DnaJ like subfamily B member 12 OS=Fusarium oxysporum f. sp. lycopersici (strain 4287 / CBS 123668 / FGSC 9935 / NRRL 34936) OX=426428 GN=FOXG_11082 PE=4 SV=1	2	2	0.073	39601.9	8.78
$718-2	tr|A0A0J9WQM2|A0A0J9WQM2_FUSO4 DnaJ like subfamily B member 12 OS=Fusarium oxysporum f. sp. lycopersici (strain 4287 / CBS 123668 / FGSC 9935 / NRRL 34936) OX=426428 GN=FOXG_11082 PE=4 SV=1	2	2	0.0739	39167.4	8.94
$719-1	tr|A0A0D2Y491|A0A0D2Y491_FUSO4 Uncharacterized protein OS=Fusarium oxysporum f. sp. lycopersici (strain 4287 / CBS 123668 / FGSC 9935 / NRRL 34936) OX=426428 PE=4 SV=1	2	2	0.0356	38934.8	5.04
$720-1	tr|A0A0D2Y4R3|A0A0D2Y4R3_FUSO4 Sof1 domain-containing protein OS=Fusarium oxysporum f. sp. lycopersici (strain 4287 / CBS 123668 / FGSC 9935 / NRRL 34936) OX=426428 PE=3 SV=1	2	2	0.0427	50913.8	9.62
$720-2	tr|A0A0J9VKS2|A0A0J9VKS2_FUSO4 Sof1 domain-containing protein OS=Fusarium oxysporum f. sp. lycopersici (strain 4287 / CBS 123668 / FGSC 9935 / NRRL 34936) OX=426428 GN=FOXG_11266 PE=3 SV=1	2	2	0.0393	55110.6	9.69
$721-1	tr|A0A0D2Y4S4|A0A0D2Y4S4_FUSO4 Uncharacterized protein OS=Fusarium oxysporum f. sp. lycopersici (strain 4287 / CBS 123668 / FGSC 9935 / NRRL 34936) OX=426428 GN=FOXG_11277 PE=4 SV=1	2	2	0.1158	20391.2	5.64
$722-1	tr|A0A0D2Y4U5|A0A0D2Y4U5_FUSO4 WW domain-containing protein OS=Fusarium oxysporum f. sp. lycopersici (strain 4287 / CBS 123668 / FGSC 9935 / NRRL 34936) OX=426428 GN=FOXG_11299 PE=4 SV=1	2	2	0.065	32714.8	4.67
$723-1	tr|A0A0D2Y4X5|A0A0D2Y4X5_FUSO4 Nucleolar GTP-binding protein 2 OS=Fusarium oxysporum f. sp. lycopersici (strain 4287 / CBS 123668 / FGSC 9935 / NRRL 34936) OX=426428 GN=FOXG_11329 PE=3 SV=1	2	2	0.0323	69005	8.04
$724-1	tr|A0A0D2Y513|A0A0D2Y513_FUSO4 Uncharacterized protein OS=Fusarium oxysporum f. sp. lycopersici (strain 4287 / CBS 123668 / FGSC 9935 / NRRL 34936) OX=426428 GN=FOXG_11367 PE=4 SV=1	2	2	0.0285	50322.8	5
$725-1	tr|A0A0D2Y5C5|A0A0D2Y5C5_FUSO4 DNA ligase OS=Fusarium oxysporum f. sp. lycopersici (strain 4287 / CBS 123668 / FGSC 9935 / NRRL 34936) OX=426428 GN=FOXG_11480 PE=3 SV=1	2	2	0.0122	112915	6.23
$726-1	tr|A0A0D2Y5L5|A0A0D2Y5L5_FUSO4 Uncharacterized protein OS=Fusarium oxysporum f. sp. lycopersici (strain 4287 / CBS 123668 / FGSC 9935 / NRRL 34936) OX=426428 GN=FOXG_11571 PE=4 SV=1	2	2	0.0809	29116.8	8.15
$727-1	tr|A0A0D2Y5L7|A0A0D2Y5L7_FUSO4 GTP-binding protein rho2 OS=Fusarium oxysporum f. sp. lycopersici (strain 4287 / CBS 123668 / FGSC 9935 / NRRL 34936) OX=426428 GN=FOXG_11573 PE=4 SV=1	2	2	0.0955	21899.9	5.45
$728-1	tr|A0A0D2Y5S1|A0A0D2Y5S1_FUSO4 Brix domain-containing protein OS=Fusarium oxysporum f. sp. lycopersici (strain 4287 / CBS 123668 / FGSC 9935 / NRRL 34936) OX=426428 PE=4 SV=1	2	2	0.0474	47601	5.77
$728-2	tr|A0A0J9VLH9|A0A0J9VLH9_FUSO4 Brix domain-containing protein OS=Fusarium oxysporum f. sp. lycopersici (strain 4287 / CBS 123668 / FGSC 9935 / NRRL 34936) OX=426428 GN=FOXG_11627 PE=4 SV=1	2	2	0.0441	51001.8	6.57
$729-1	tr|A0A0D2Y5V3|A0A0D2Y5V3_FUSO4 Signal peptidase complex catalytic subunit SEC11 OS=Fusarium oxysporum f. sp. lycopersici (strain 4287 / CBS 123668 / FGSC 9935 / NRRL 34936) OX=426428 GN=FOXG_11659 PE=3 SV=1	2	2	0.1337	19171.2	5.43
$730-1	tr|A0A0D2Y617|A0A0D2Y617_FUSO4 2-deoxy-D-gluconate 3-dehydrogenase OS=Fusarium oxysporum f. sp. lycopersici (strain 4287 / CBS 123668 / FGSC 9935 / NRRL 34936) OX=426428 GN=FOXG_11725 PE=3 SV=1	2	2	0.0382	28333	5.86
$731-1	tr|A0A0D2Y624|A0A0D2Y624_FUSO4 Uncharacterized protein OS=Fusarium oxysporum f. sp. lycopersici (strain 4287 / CBS 123668 / FGSC 9935 / NRRL 34936) OX=426428 PE=4 SV=1	2	2	0.0498	31877.8	7.02
$731-2	tr|A0A0J9VLY2|A0A0J9VLY2_FUSO4 Uncharacterized protein OS=Fusarium oxysporum f. sp. lycopersici (strain 4287 / CBS 123668 / FGSC 9935 / NRRL 34936) OX=426428 GN=FOXG_11732 PE=4 SV=1	2	2	0.0347	45495.1	8.2
$732-1	tr|A0A0D2Y718|A0A0D2Y718_FUSO4 Tyrosinase_Cu-bd domain-containing protein OS=Fusarium oxysporum f. sp. lycopersici (strain 4287 / CBS 123668 / FGSC 9935 / NRRL 34936) OX=426428 GN=FOXG_12078 PE=4 SV=1	2	2	0.0317	67847.4	5.45
$733-1	tr|A0A0D2Y7C8|A0A0D2Y7C8_FUSO4 AMP-binding domain-containing protein OS=Fusarium oxysporum f. sp. lycopersici (strain 4287 / CBS 123668 / FGSC 9935 / NRRL 34936) OX=426428 GN=FOXG_12190 PE=4 SV=1	2	2	0.0279	59624.5	6
$734-1	tr|A0A0D2Y8Q2|A0A0D2Y8Q2_FUSO4 Tryptophan synthase OS=Fusarium oxysporum f. sp. lycopersici (strain 4287 / CBS 123668 / FGSC 9935 / NRRL 34936) OX=426428 GN=FOXG_12668 PE=3 SV=1	2	2	0.0293	77012.8	5.7
$735-1	tr|A0A0D2Y8S8|A0A0D2Y8S8_FUSO4 Uncharacterized protein OS=Fusarium oxysporum f. sp. lycopersici (strain 4287 / CBS 123668 / FGSC 9935 / NRRL 34936) OX=426428 GN=FOXG_12694 PE=3 SV=1	2	2	0.0176	114387	5.5
$736-1	tr|A0A0D2Y8T0|A0A0D2Y8T0_FUSO4 26S protease regulatory subunit 6B OS=Fusarium oxysporum f. sp. lycopersici (strain 4287 / CBS 123668 / FGSC 9935 / NRRL 34936) OX=426428 GN=FOXG_12696 PE=3 SV=1	2	2	0.0499	46910.8	5.43
$737-1	tr|A0A0D2Y913|A0A0D2Y913_FUSO4 Amino_oxidase domain-containing protein OS=Fusarium oxysporum f. sp. lycopersici (strain 4287 / CBS 123668 / FGSC 9935 / NRRL 34936) OX=426428 GN=FOXG_12781 PE=4 SV=1	2	2	0.0249	59078.4	9.54
$738-1	tr|A0A0D2Y946|A0A0D2Y946_FUSO4 Uncharacterized protein OS=Fusarium oxysporum f. sp. lycopersici (strain 4287 / CBS 123668 / FGSC 9935 / NRRL 34936) OX=426428 GN=FOXG_12816 PE=4 SV=1	2	2	0.0158	84726.5	6.42
$739-1	tr|A0A0D2Y9G6|A0A0D2Y9G6_FUSO4 3'-5' exonuclease domain-containing protein OS=Fusarium oxysporum f. sp. lycopersici (strain 4287 / CBS 123668 / FGSC 9935 / NRRL 34936) OX=426428 GN=FOXG_12936 PE=4 SV=1	2	2	0.0741	28313.1	6.24
$740-1	tr|A0A0D2Y9M6|A0A0D2Y9M6_FUSO4 Altered inheritance of mitochondria protein 24, mitochondrial OS=Fusarium oxysporum f. sp. lycopersici (strain 4287 / CBS 123668 / FGSC 9935 / NRRL 34936) OX=426428 GN=FOXG_12996 PE=3 SV=1	2	2	0.0913	25836.8	6.75
$741-1	tr|A0A0D2Y9Q4|A0A0D2Y9Q4_FUSO4 Uncharacterized protein OS=Fusarium oxysporum f. sp. lycopersici (strain 4287 / CBS 123668 / FGSC 9935 / NRRL 34936) OX=426428 GN=FOXG_13024 PE=4 SV=1	2	2	0.0015	830438	5.36
$742-1	tr|A0A0D2YAF2|A0A0D2YAF2_FUSO4 DAO domain-containing protein OS=Fusarium oxysporum f. sp. lycopersici (strain 4287 / CBS 123668 / FGSC 9935 / NRRL 34936) OX=426428 GN=FOXG_13277 PE=4 SV=1	2	2	0.0272	52912	6.18
$743-1	tr|A0A0D2YAK7|A0A0D2YAK7_FUSO4 Uncharacterized protein OS=Fusarium oxysporum f. sp. lycopersici (strain 4287 / CBS 123668 / FGSC 9935 / NRRL 34936) OX=426428 PE=4 SV=1	2	2	0.0497	20618.5	4.46
$743-2	tr|A0A0J9VUR0|A0A0J9VUR0_FUSO4 Uncharacterized protein OS=Fusarium oxysporum f. sp. lycopersici (strain 4287 / CBS 123668 / FGSC 9935 / NRRL 34936) OX=426428 GN=FOXG_13333 PE=4 SV=1	2	2	0.0443	23113.5	4.57
$744-1	tr|A0A0D2YBM9|A0A0D2YBM9_FUSO4 Sodium/potassium-transporting ATPase subunit alpha OS=Fusarium oxysporum f. sp. lycopersici (strain 4287 / CBS 123668 / FGSC 9935 / NRRL 34936) OX=426428 GN=FOXG_13707 PE=4 SV=1	2	2	0.0347	56466.7	6.65
$745-1	tr|A0A0D2YBU7|A0A0D2YBU7_FUSO4 Uncharacterized protein OS=Fusarium oxysporum f. sp. lycopersici (strain 4287 / CBS 123668 / FGSC 9935 / NRRL 34936) OX=426428 PE=4 SV=1	2	2	0.0282	49111.2	8.98
$746-1	tr|A0A0D2YBU8|A0A0D2YBU8_FUSO4 Uncharacterized protein OS=Fusarium oxysporum f. sp. lycopersici (strain 4287 / CBS 123668 / FGSC 9935 / NRRL 34936) OX=426428 PE=4 SV=1	2	2	0.0284	40539	9.32
$746-2	tr|A0A0J9VW78|A0A0J9VW78_FUSO4 Uncharacterized protein OS=Fusarium oxysporum f. sp. lycopersici (strain 4287 / CBS 123668 / FGSC 9935 / NRRL 34936) OX=426428 GN=FOXG_13777 PE=4 SV=1	2	2	0.037	31281.1	9.4
$747-1	tr|A0A0D2YBV8|A0A0D2YBV8_FUSO4 Peroxidase OS=Fusarium oxysporum f. sp. lycopersici (strain 4287 / CBS 123668 / FGSC 9935 / NRRL 34936) OX=426428 GN=FOXG_13788 PE=3 SV=1	2	2	0.0226	57230.1	8.93
$748-1	tr|A0A0D2YC02|A0A0D2YC02_FUSO4 Urease accessory protein OS=Fusarium oxysporum f. sp. lycopersici (strain 4287 / CBS 123668 / FGSC 9935 / NRRL 34936) OX=426428 GN=FOXG_13832 PE=3 SV=1	2	2	0.0743	29081.3	5.41
$749-1	tr|A0A0D2YDE8|A0A0D2YDE8_FUSO4 Uncharacterized protein OS=Fusarium oxysporum f. sp. lycopersici (strain 4287 / CBS 123668 / FGSC 9935 / NRRL 34936) OX=426428 GN=FOXG_14332 PE=4 SV=1	2	2	0.0581	30745.3	5.35
$749-2	tr|A0A0J9WUF2|A0A0J9WUF2_FUSO4 Uncharacterized protein (Fragment) OS=Fusarium oxysporum f. sp. lycopersici (strain 4287 / CBS 123668 / FGSC 9935 / NRRL 34936) OX=426428 GN=FOXG_15148 PE=4 SV=1	2	2	0.0577	30938.5	5.35
$750-1	tr|A0A0D2YEZ3|A0A0D2YEZ3_FUSO4 ATP-dependent DNA helicase OS=Fusarium oxysporum f. sp. lycopersici (strain 4287 / CBS 123668 / FGSC 9935 / NRRL 34936) OX=426428 GN=FOXG_14881 PE=3 SV=1	2	2	0.0093	202813	8.43
$751-1	tr|A0A0D2YF08|A0A0D2YF08_FUSO4 Uncharacterized protein OS=Fusarium oxysporum f. sp. lycopersici (strain 4287 / CBS 123668 / FGSC 9935 / NRRL 34936) OX=426428 PE=3 SV=1	2	2	0.0293	48175.1	8.51
$751-2	tr|A0A0J9WTZ1|A0A0J9WTZ1_FUSO4 Uncharacterized protein OS=Fusarium oxysporum f. sp. lycopersici (strain 4287 / CBS 123668 / FGSC 9935 / NRRL 34936) OX=426428 GN=FOXG_14896 PE=3 SV=1	2	2	0.027	52175	8.59
$752-1	tr|A0A0D2YGG7|A0A0D2YGG7_FUSO4 MFS domain-containing protein OS=Fusarium oxysporum f. sp. lycopersici (strain 4287 / CBS 123668 / FGSC 9935 / NRRL 34936) OX=426428 GN=FOXG_15407 PE=4 SV=1	2	2	0.0183	53393.8	8.78
$753-1	tr|A0A0D2YGK4|A0A0D2YGK4_FUSO4 Pyruvate kinase OS=Fusarium oxysporum f. sp. lycopersici (strain 4287 / CBS 123668 / FGSC 9935 / NRRL 34936) OX=426428 GN=FOXG_15445 PE=3 SV=1	2	2	0.0379	58004.5	5.9
$753-2	tr|A0A0J9W3F4|A0A0J9W3F4_FUSO4 Pyruvate kinase OS=Fusarium oxysporum f. sp. lycopersici (strain 4287 / CBS 123668 / FGSC 9935 / NRRL 34936) OX=426428 GN=FOXG_15445 PE=3 SV=1	2	2	0.037	59451.2	6.35
$754-1	tr|A0A0D2YGQ3|A0A0D2YGQ3_FUSO4 Integrase catalytic domain-containing protein OS=Fusarium oxysporum f. sp. lycopersici (strain 4287 / CBS 123668 / FGSC 9935 / NRRL 34936) OX=426428 PE=4 SV=1	2	2	0.0091	138512	9.05
$755-1	tr|A0A0D2YH18|A0A0D2YH18_FUSO4 Uncharacterized protein OS=Fusarium oxysporum f. sp. lycopersici (strain 4287 / CBS 123668 / FGSC 9935 / NRRL 34936) OX=426428 GN=FOXG_15609 PE=4 SV=1	2	2	0.0142	116909	6.15
$755-2	tr|A0A0J9WUU8|A0A0J9WUU8_FUSO4 Zn(2)-C6 fungal-type domain-containing protein OS=Fusarium oxysporum f. sp. lycopersici (strain 4287 / CBS 123668 / FGSC 9935 / NRRL 34936) OX=426428 GN=FOXG_22222 PE=4 SV=1	2	2	0.0221	76173.4	6.24
$756-1	tr|A0A0D2YH37|A0A0D2YH37_FUSO4 Pyruvate dehydrogenase E1 component subunit beta OS=Fusarium oxysporum f. sp. lycopersici (strain 4287 / CBS 123668 / FGSC 9935 / NRRL 34936) OX=426428 GN=FOXG_15628 PE=4 SV=1	2	2	0.062	41628.1	5.72
$757-1	tr|A0A0J9U496|A0A0J9U496_FUSO4 Uncharacterized protein OS=Fusarium oxysporum f. sp. lycopersici (strain 4287 / CBS 123668 / FGSC 9935 / NRRL 34936) OX=426428 GN=FOXG_00228 PE=4 SV=1	2	2	0.0146	96642.8	7.09
$757-2	tr|A0A0D2X8L9|A0A0D2X8L9_FUSO4 Uncharacterized protein OS=Fusarium oxysporum f. sp. lycopersici (strain 4287 / CBS 123668 / FGSC 9935 / NRRL 34936) OX=426428 GN=FOXG_00228 PE=4 SV=1	2	2	0.0143	98353.5	7.39
$758-1	tr|A0A0J9U5Z5|A0A0J9U5Z5_FUSO4 U2 small nuclear ribonucleoprotein B OS=Fusarium oxysporum f. sp. lycopersici (strain 4287 / CBS 123668 / FGSC 9935 / NRRL 34936) OX=426428 GN=FOXG_00437 PE=4 SV=1	2	2	0.0938	25481.5	11.58
$759-1	tr|A0A0J9U684|A0A0J9U684_FUSO4 DRIM domain-containing protein OS=Fusarium oxysporum f. sp. lycopersici (strain 4287 / CBS 123668 / FGSC 9935 / NRRL 34936) OX=426428 GN=FOXG_00487 PE=4 SV=1	2	2	0.0061	297441	6.12
$759-2	tr|A0A0D2X9C6|A0A0D2X9C6_FUSO4 DRIM domain-containing protein OS=Fusarium oxysporum f. sp. lycopersici (strain 4287 / CBS 123668 / FGSC 9935 / NRRL 34936) OX=426428 PE=4 SV=1	2	2	0.0061	294971	6.06
$760-1	tr|A0A0J9U6P1|A0A0J9U6P1_FUSO4 Uncharacterized protein OS=Fusarium oxysporum f. sp. lycopersici (strain 4287 / CBS 123668 / FGSC 9935 / NRRL 34936) OX=426428 GN=FOXG_00564 PE=4 SV=1	2	2	0.1421	19326.8	4.23
$761-1	tr|A0A0J9U8A7|A0A0J9U8A7_FUSO4 Uncharacterized protein OS=Fusarium oxysporum f. sp. lycopersici (strain 4287 / CBS 123668 / FGSC 9935 / NRRL 34936) OX=426428 GN=FOXG_00812 PE=4 SV=1	2	2	0.0517	37895.6	10.22
$762-1	tr|A0A0J9U8Y1|A0A0J9U8Y1_FUSO4 Uncharacterized protein OS=Fusarium oxysporum f. sp. lycopersici (strain 4287 / CBS 123668 / FGSC 9935 / NRRL 34936) OX=426428 GN=FOXG_00544 PE=4 SV=1	2	2	0.0655	31879.4	9
$762-2	tr|A0A0D2X9H9|A0A0D2X9H9_FUSO4 Uncharacterized protein OS=Fusarium oxysporum f. sp. lycopersici (strain 4287 / CBS 123668 / FGSC 9935 / NRRL 34936) OX=426428 GN=FOXG_00544 PE=4 SV=1	2	2	0.0537	39068.2	8.69
$762-3	tr|A0A0J9WG79|A0A0J9WG79_FUSO4 Uncharacterized protein OS=Fusarium oxysporum f. sp. lycopersici (strain 4287 / CBS 123668 / FGSC 9935 / NRRL 34936) OX=426428 GN=FOXG_00544 PE=4 SV=1	2	2	0.0483	43179.1	6.73
$762-4	tr|A0A0J9U6J2|A0A0J9U6J2_FUSO4 Uncharacterized protein OS=Fusarium oxysporum f. sp. lycopersici (strain 4287 / CBS 123668 / FGSC 9935 / NRRL 34936) OX=426428 GN=FOXG_00544 PE=4 SV=1	2	2	0.056	37283.3	8.52
$763-1	tr|A0A0J9UBL7|A0A0J9UBL7_FUSO4 Uncharacterized protein OS=Fusarium oxysporum f. sp. lycopersici (strain 4287 / CBS 123668 / FGSC 9935 / NRRL 34936) OX=426428 GN=FOXG_01768 PE=3 SV=1	2	2	0.0575	48285.3	6.35
$763-2	tr|A0A0D2XCZ3|A0A0D2XCZ3_FUSO4 Uncharacterized protein OS=Fusarium oxysporum f. sp. lycopersici (strain 4287 / CBS 123668 / FGSC 9935 / NRRL 34936) OX=426428 GN=FOXG_01768 PE=3 SV=1	2	2	0.0546	50707	6.54
$764-1	tr|A0A0J9UC81|A0A0J9UC81_FUSO4 F-box domain-containing protein OS=Fusarium oxysporum f. sp. lycopersici (strain 4287 / CBS 123668 / FGSC 9935 / NRRL 34936) OX=426428 GN=FOXG_01742 PE=4 SV=1	2	2	0.0091	130836	8.65
$764-2	tr|A0A0D2XCW7|A0A0D2XCW7_FUSO4 Uncharacterized protein OS=Fusarium oxysporum f. sp. lycopersici (strain 4287 / CBS 123668 / FGSC 9935 / NRRL 34936) OX=426428 PE=4 SV=1	2	2	0.0098	120328	6.78
$765-1	tr|A0A0J9UCG5|A0A0J9UCG5_FUSO4 Uncharacterized protein OS=Fusarium oxysporum f. sp. lycopersici (strain 4287 / CBS 123668 / FGSC 9935 / NRRL 34936) OX=426428 GN=FOXG_01195 PE=4 SV=1	2	2	0.0199	71850.7	4.91
$765-2	tr|A0A0D2XBC6|A0A0D2XBC6_FUSO4 Uncharacterized protein OS=Fusarium oxysporum f. sp. lycopersici (strain 4287 / CBS 123668 / FGSC 9935 / NRRL 34936) OX=426428 GN=FOXG_01195 PE=4 SV=1	2	2	0.0187	76379.8	5.05
$766-1	tr|A0A0J9UCS8|A0A0J9UCS8_FUSO4 Non-specific serine/threonine protein kinase OS=Fusarium oxysporum f. sp. lycopersici (strain 4287 / CBS 123668 / FGSC 9935 / NRRL 34936) OX=426428 GN=FOXG_01858 PE=3 SV=1	2	2	0.0269	90535.1	9.26
$767-1	tr|A0A0J9UDK2|A0A0J9UDK2_FUSO4 Aspartokinase OS=Fusarium oxysporum f. sp. lycopersici (strain 4287 / CBS 123668 / FGSC 9935 / NRRL 34936) OX=426428 GN=FOXG_01470 PE=3 SV=1	2	2	0.0294	55716.1	6.74
$767-2	tr|A0A0D2XC47|A0A0D2XC47_FUSO4 Aspartokinase OS=Fusarium oxysporum f. sp. lycopersici (strain 4287 / CBS 123668 / FGSC 9935 / NRRL 34936) OX=426428 PE=3 SV=1	2	2	0.0361	45627.7	6.18
$768-1	tr|A0A0J9UDM3|A0A0J9UDM3_FUSO4 Eukaryotic peptide chain release factor subunit 1 OS=Fusarium oxysporum f. sp. lycopersici (strain 4287 / CBS 123668 / FGSC 9935 / NRRL 34936) OX=426428 GN=FOXG_01893 PE=3 SV=1	2	2	0.0547	43169.1	5.1
$768-2	tr|A0A0J9UC53|A0A0J9UC53_FUSO4 Eukaryotic peptide chain release factor subunit 1 OS=Fusarium oxysporum f. sp. lycopersici (strain 4287 / CBS 123668 / FGSC 9935 / NRRL 34936) OX=426428 GN=FOXG_01893 PE=3 SV=1	2	2	0.0479	49055.9	5.4
$768-3	tr|A0A0J9UC57|A0A0J9UC57_FUSO4 Eukaryotic peptide chain release factor subunit 1 OS=Fusarium oxysporum f. sp. lycopersici (strain 4287 / CBS 123668 / FGSC 9935 / NRRL 34936) OX=426428 GN=FOXG_01893 PE=3 SV=1	2	2	0.0544	43306.2	5.2
$768-4	tr|A0A0J9WHK4|A0A0J9WHK4_FUSO4 Eukaryotic peptide chain release factor subunit 1 OS=Fusarium oxysporum f. sp. lycopersici (strain 4287 / CBS 123668 / FGSC 9935 / NRRL 34936) OX=426428 GN=FOXG_01893 PE=3 SV=1	2	2	0.0524	45018.3	5.23
$768-5	tr|A0A0D2XDB5|A0A0D2XDB5_FUSO4 Eukaryotic peptide chain release factor subunit 1 OS=Fusarium oxysporum f. sp. lycopersici (strain 4287 / CBS 123668 / FGSC 9935 / NRRL 34936) OX=426428 GN=FOXG_01893 PE=3 SV=1	2	2	0.0483	48800.6	5.4
$769-1	tr|A0A0J9UED2|A0A0J9UED2_FUSO4 Aspartyl aminopeptidase OS=Fusarium oxysporum f. sp. lycopersici (strain 4287 / CBS 123668 / FGSC 9935 / NRRL 34936) OX=426428 GN=FOXG_02286 PE=3 SV=1	2	2	0.0265	58070	5.64
$770-1	tr|A0A0J9UEK6|A0A0J9UEK6_FUSO4 DNA replication licensing factor MCM5 OS=Fusarium oxysporum f. sp. lycopersici (strain 4287 / CBS 123668 / FGSC 9935 / NRRL 34936) OX=426428 GN=FOXG_02046 PE=3 SV=1	2	2	0.0421	73893.4	6.43
$770-2	tr|A0A0D2XDR6|A0A0D2XDR6_FUSO4 DNA replication licensing factor MCM5 OS=Fusarium oxysporum f. sp. lycopersici (strain 4287 / CBS 123668 / FGSC 9935 / NRRL 34936) OX=426428 PE=3 SV=1	2	2	0.0613	50307	6.8
$771-1	tr|A0A0J9UEW7|A0A0J9UEW7_FUSO4 Mitochondrial pyruvate carrier OS=Fusarium oxysporum f. sp. lycopersici (strain 4287 / CBS 123668 / FGSC 9935 / NRRL 34936) OX=426428 GN=FOXG_01732 PE=3 SV=1	2	2	0.1531	10880.4	9.24
$771-2	tr|A0A0J9UC64|A0A0J9UC64_FUSO4 Mitochondrial pyruvate carrier OS=Fusarium oxysporum f. sp. lycopersici (strain 4287 / CBS 123668 / FGSC 9935 / NRRL 34936) OX=426428 GN=FOXG_01732 PE=3 SV=1	2	2	0.124	13310.2	8.67
$771-3	tr|A0A0D2XCV7|A0A0D2XCV7_FUSO4 Mitochondrial pyruvate carrier OS=Fusarium oxysporum f. sp. lycopersici (strain 4287 / CBS 123668 / FGSC 9935 / NRRL 34936) OX=426428 GN=FOXG_01732 PE=3 SV=1	2	2	0.1087	15108.3	9.37
$772-1	tr|A0A0J9UHV8|A0A0J9UHV8_FUSO4 Uncharacterized protein OS=Fusarium oxysporum f. sp. lycopersici (strain 4287 / CBS 123668 / FGSC 9935 / NRRL 34936) OX=426428 GN=FOXG_18408 PE=4 SV=1	2	2	0.1176	21679	8.24
$773-1	tr|A0A0J9UI89|A0A0J9UI89_FUSO4 Aspartyl-tRNA synthetase OS=Fusarium oxysporum f. sp. lycopersici (strain 4287 / CBS 123668 / FGSC 9935 / NRRL 34936) OX=426428 GN=FOXG_03094 PE=4 SV=1	2	2	0.0425	54252.9	5.56
$774-1	tr|A0A0J9UK53|A0A0J9UK53_FUSO4 Uncharacterized protein OS=Fusarium oxysporum f. sp. lycopersici (strain 4287 / CBS 123668 / FGSC 9935 / NRRL 34936) OX=426428 GN=FOXG_03465 PE=4 SV=1	2	2	0.0058	224347	6.31
$774-2	tr|A0A0D2XHR7|A0A0D2XHR7_FUSO4 Uncharacterized protein OS=Fusarium oxysporum f. sp. lycopersici (strain 4287 / CBS 123668 / FGSC 9935 / NRRL 34936) OX=426428 PE=4 SV=1	2	2	0.01	128978	5.06
$775-1	tr|A0A0J9UKH0|A0A0J9UKH0_FUSO4 Uncharacterized protein OS=Fusarium oxysporum f. sp. lycopersici (strain 4287 / CBS 123668 / FGSC 9935 / NRRL 34936) OX=426428 GN=FOXG_03330 PE=4 SV=1	2	2	0.0818	18074.1	6.35
$776-1	tr|A0A0J9UKX4|A0A0J9UKX4_FUSO4 Uncharacterized protein OS=Fusarium oxysporum f. sp. lycopersici (strain 4287 / CBS 123668 / FGSC 9935 / NRRL 34936) OX=426428 GN=FOXG_03424 PE=4 SV=1	2	2	0.0114	155199	5.5
$776-2	tr|A0A0D2XHM6|A0A0D2XHM6_FUSO4 Uncharacterized protein OS=Fusarium oxysporum f. sp. lycopersici (strain 4287 / CBS 123668 / FGSC 9935 / NRRL 34936) OX=426428 GN=FOXG_03424 PE=4 SV=1	2	2	0.0111	158772	5.48
$777-1	tr|A0A0J9UMC5|A0A0J9UMC5_FUSO4 Sulfate permease SutB OS=Fusarium oxysporum f. sp. lycopersici (strain 4287 / CBS 123668 / FGSC 9935 / NRRL 34936) OX=426428 GN=FOXG_04144 PE=3 SV=1	2	2	0.0185	81363.2	8.77
$778-1	tr|A0A0J9UN00|A0A0J9UN00_FUSO4 Uncharacterized protein OS=Fusarium oxysporum f. sp. lycopersici (strain 4287 / CBS 123668 / FGSC 9935 / NRRL 34936) OX=426428 GN=FOXG_04138 PE=4 SV=1	2	2	0.0074	178938	8.85
$778-2	tr|A0A0J9UR01|A0A0J9UR01_FUSO4 Uncharacterized protein OS=Fusarium oxysporum f. sp. lycopersici (strain 4287 / CBS 123668 / FGSC 9935 / NRRL 34936) OX=426428 GN=FOXG_04138 PE=4 SV=1	2	2	0.0076	175220	8.76
$779-1	tr|A0A0J9URF5|A0A0J9URF5_FUSO4 Protein transport protein SEC23 OS=Fusarium oxysporum f. sp. lycopersici (strain 4287 / CBS 123668 / FGSC 9935 / NRRL 34936) OX=426428 GN=FOXG_04216 PE=3 SV=1	2	2	0.0301	85219.3	5.96
$779-2	tr|A0A0D2XJV0|A0A0D2XJV0_FUSO4 Protein transport protein SEC23 OS=Fusarium oxysporum f. sp. lycopersici (strain 4287 / CBS 123668 / FGSC 9935 / NRRL 34936) OX=426428 GN=FOXG_04216 PE=3 SV=1	2	2	0.0298	85862	5.96
$780-1	tr|A0A0J9USC9|A0A0J9USC9_FUSO4 Transketolase OS=Fusarium oxysporum f. sp. lycopersici (strain 4287 / CBS 123668 / FGSC 9935 / NRRL 34936) OX=426428 GN=FOXG_05349 PE=3 SV=1	2	2	0.0276	71528.7	5.68
$780-2	tr|A0A0J9UTA3|A0A0J9UTA3_FUSO4 Transketolase OS=Fusarium oxysporum f. sp. lycopersici (strain 4287 / CBS 123668 / FGSC 9935 / NRRL 34936) OX=426428 GN=FOXG_05349 PE=3 SV=1	2	2	0.0293	67188.7	5.47
$780-3	tr|A0A0J9UVH0|A0A0J9UVH0_FUSO4 Transketolase OS=Fusarium oxysporum f. sp. lycopersici (strain 4287 / CBS 123668 / FGSC 9935 / NRRL 34936) OX=426428 GN=FOXG_05349 PE=3 SV=1	2	2	0.0344	57627.1	5.58
$780-4	tr|A0A0D2XN20|A0A0D2XN20_FUSO4 Transketolase OS=Fusarium oxysporum f. sp. lycopersici (strain 4287 / CBS 123668 / FGSC 9935 / NRRL 34936) OX=426428 GN=FOXG_05349 PE=3 SV=1	2	2	0.0263	74874.4	5.71
$781-1	tr|A0A0J9UT99|A0A0J9UT99_FUSO4 60S ribosomal protein L30 OS=Fusarium oxysporum f. sp. lycopersici (strain 4287 / CBS 123668 / FGSC 9935 / NRRL 34936) OX=426428 GN=FOXG_05161 PE=3 SV=1	2	2	0.1636	11842.7	9.77
$781-2	tr|A0A0D2XMI4|A0A0D2XMI4_FUSO4 60S ribosomal protein L30 OS=Fusarium oxysporum f. sp. lycopersici (strain 4287 / CBS 123668 / FGSC 9935 / NRRL 34936) OX=426428 GN=FOXG_05161 PE=3 SV=1	2	2	0.1837	10617.4	10.26
$782-1	tr|A0A0J9UTM6|A0A0J9UTM6_FUSO4 Phosphatidylserine decarboxylase proenzyme 2 OS=Fusarium oxysporum f. sp. lycopersici (strain 4287 / CBS 123668 / FGSC 9935 / NRRL 34936) OX=426428 GN=PSD2 PE=3 SV=1	2	2	0.0179	124480	5.95
$783-1	tr|A0A0J9UUB8|A0A0J9UUB8_FUSO4 Spindle pole body component OS=Fusarium oxysporum f. sp. lycopersici (strain 4287 / CBS 123668 / FGSC 9935 / NRRL 34936) OX=426428 GN=FOXG_19073 PE=3 SV=1	2	2	0.0171	99325.8	6.77
$784-1	tr|A0A0J9UVK0|A0A0J9UVK0_FUSO4 Letm1 RBD domain-containing protein OS=Fusarium oxysporum f. sp. lycopersici (strain 4287 / CBS 123668 / FGSC 9935 / NRRL 34936) OX=426428 GN=FOXG_05773 PE=4 SV=1	2	2	0.0483	41605.7	5.29
$784-2	tr|A0A0D2XP86|A0A0D2XP86_FUSO4 Letm1 RBD domain-containing protein OS=Fusarium oxysporum f. sp. lycopersici (strain 4287 / CBS 123668 / FGSC 9935 / NRRL 34936) OX=426428 PE=4 SV=1	2	2	0.034	58183.5	7.69
$785-1	tr|A0A0J9UYP4|A0A0J9UYP4_FUSO4 Uncharacterized protein OS=Fusarium oxysporum f. sp. lycopersici (strain 4287 / CBS 123668 / FGSC 9935 / NRRL 34936) OX=426428 GN=FOXG_06312 PE=4 SV=1	2	2	0.0174	72916.9	9.44
$786-1	tr|A0A0J9UYR3|A0A0J9UYR3_FUSO4 Uncharacterized protein OS=Fusarium oxysporum f. sp. lycopersici (strain 4287 / CBS 123668 / FGSC 9935 / NRRL 34936) OX=426428 GN=FOXG_06102 PE=4 SV=1	2	2	0.0137	155257	8.83
$786-2	tr|A0A0D2XQ60|A0A0D2XQ60_FUSO4 Uncharacterized protein OS=Fusarium oxysporum f. sp. lycopersici (strain 4287 / CBS 123668 / FGSC 9935 / NRRL 34936) OX=426428 GN=FOXG_06102 PE=4 SV=1	2	2	0.0132	161915	8.72
$787-1	tr|A0A0J9V2I7|A0A0J9V2I7_FUSO4 HET domain-containing protein OS=Fusarium oxysporum f. sp. lycopersici (strain 4287 / CBS 123668 / FGSC 9935 / NRRL 34936) OX=426428 GN=FOXG_07674 PE=4 SV=1	2	2	0.0215	82876.4	6.63
$787-2	tr|A0A0D2XUM1|A0A0D2XUM1_FUSO4 HET domain-containing protein OS=Fusarium oxysporum f. sp. lycopersici (strain 4287 / CBS 123668 / FGSC 9935 / NRRL 34936) OX=426428 PE=4 SV=1	2	2	0.0225	79243.2	6.73
$788-1	tr|A0A0J9V2Y0|A0A0J9V2Y0_FUSO4 FAD-binding FR-type domain-containing protein OS=Fusarium oxysporum f. sp. lycopersici (strain 4287 / CBS 123668 / FGSC 9935 / NRRL 34936) OX=426428 GN=FOXG_07769 PE=4 SV=1	2	2	0.0276	72758.3	8.48
$789-1	tr|A0A0J9V3A2|A0A0J9V3A2_FUSO4 SURF6 domain-containing protein OS=Fusarium oxysporum f. sp. lycopersici (strain 4287 / CBS 123668 / FGSC 9935 / NRRL 34936) OX=426428 GN=FOXG_08098 PE=3 SV=1	2	2	0.0249	58247.4	9.61
$789-2	tr|A0A0D2XVT6|A0A0D2XVT6_FUSO4 Uncharacterized protein OS=Fusarium oxysporum f. sp. lycopersici (strain 4287 / CBS 123668 / FGSC 9935 / NRRL 34936) OX=426428 GN=FOXG_08098 PE=3 SV=1	2	2	0.0237	61118.6	9.58
$789-3	tr|A0A0J9V3Y4|A0A0J9V3Y4_FUSO4 SURF6 domain-containing protein OS=Fusarium oxysporum f. sp. lycopersici (strain 4287 / CBS 123668 / FGSC 9935 / NRRL 34936) OX=426428 GN=FOXG_08098 PE=3 SV=1	2	2	0.0271	53365.1	9.62
$790-1	tr|A0A0J9V443|A0A0J9V443_FUSO4 Serine hydroxymethyltransferase OS=Fusarium oxysporum f. sp. lycopersici (strain 4287 / CBS 123668 / FGSC 9935 / NRRL 34936) OX=426428 GN=FOXG_08042 PE=3 SV=1	2	2	0.0405	46391.5	8.49
$790-2	tr|A0A0D2XVN0|A0A0D2XVN0_FUSO4 Serine hydroxymethyltransferase OS=Fusarium oxysporum f. sp. lycopersici (strain 4287 / CBS 123668 / FGSC 9935 / NRRL 34936) OX=426428 GN=FOXG_08042 PE=3 SV=1	2	2	0.0351	53467.4	6.95
$791-1	tr|A0A0J9V6I2|A0A0J9V6I2_FUSO4 HTH CENPB-type domain-containing protein OS=Fusarium oxysporum f. sp. lycopersici (strain 4287 / CBS 123668 / FGSC 9935 / NRRL 34936) OX=426428 GN=FOXG_08210 PE=4 SV=1	2	2	0.0375	67582.4	9.73
$792-1	tr|A0A0J9V6N2|A0A0J9V6N2_FUSO4 RNase H type-1 domain-containing protein OS=Fusarium oxysporum f. sp. lycopersici (strain 4287 / CBS 123668 / FGSC 9935 / NRRL 34936) OX=426428 GN=FOXG_08243 PE=4 SV=1	2	2	0.038	37344.3	9.28
$793-1	tr|A0A0J9V6P0|A0A0J9V6P0_FUSO4 Rab-GAP TBC domain-containing protein OS=Fusarium oxysporum f. sp. lycopersici (strain 4287 / CBS 123668 / FGSC 9935 / NRRL 34936) OX=426428 GN=FOXG_08262 PE=4 SV=1	2	2	0.0495	42514.6	4.74
$793-2	tr|A0A0D2XW97|A0A0D2XW97_FUSO4 Rab-GAP TBC domain-containing protein OS=Fusarium oxysporum f. sp. lycopersici (strain 4287 / CBS 123668 / FGSC 9935 / NRRL 34936) OX=426428 PE=4 SV=1	2	2	0.0526	40013.8	4.73
$794-1	tr|A0A0J9V6U4|A0A0J9V6U4_FUSO4 Uncharacterized protein OS=Fusarium oxysporum f. sp. lycopersici (strain 4287 / CBS 123668 / FGSC 9935 / NRRL 34936) OX=426428 GN=FOXG_08470 PE=4 SV=1	2	2	0.1799	15483.1	4.49
$794-2	tr|A0A0D2XWV4|A0A0D2XWV4_FUSO4 Uncharacterized protein OS=Fusarium oxysporum f. sp. lycopersici (strain 4287 / CBS 123668 / FGSC 9935 / NRRL 34936) OX=426428 GN=FOXG_08470 PE=4 SV=1	2	2	0.1701	16377	4.51
$795-1	tr|A0A0J9V6V9|A0A0J9V6V9_FUSO4 FNIP_N domain-containing protein OS=Fusarium oxysporum f. sp. lycopersici (strain 4287 / CBS 123668 / FGSC 9935 / NRRL 34936) OX=426428 GN=FOXG_08291 PE=4 SV=1	2	2	0.0101	130218	8.71
$795-2	tr|A0A0D2XWC5|A0A0D2XWC5_FUSO4 FNIP_N domain-containing protein OS=Fusarium oxysporum f. sp. lycopersici (strain 4287 / CBS 123668 / FGSC 9935 / NRRL 34936) OX=426428 GN=FOXG_08291 PE=4 SV=1	2	2	0.0099	132652	8.79
$796-1	tr|A0A0J9V7M7|A0A0J9V7M7_FUSO4 Importin N-terminal domain-containing protein OS=Fusarium oxysporum f. sp. lycopersici (strain 4287 / CBS 123668 / FGSC 9935 / NRRL 34936) OX=426428 GN=FOXG_08431 PE=4 SV=1	2	2	0.0192	109864	4.5
$796-2	tr|A0A0D2XWR5|A0A0D2XWR5_FUSO4 Importin N-terminal domain-containing protein OS=Fusarium oxysporum f. sp. lycopersici (strain 4287 / CBS 123668 / FGSC 9935 / NRRL 34936) OX=426428 PE=4 SV=1	2	2	0.0279	75650.2	4.51
$797-1	tr|A0A0J9V949|A0A0J9V949_FUSO4 Translation initiation factor 3 subunit G OS=Fusarium oxysporum f. sp. lycopersici (strain 4287 / CBS 123668 / FGSC 9935 / NRRL 34936) OX=426428 GN=FOXG_08630 PE=4 SV=1	2	2	0.061	35819	9.51
$797-2	tr|A0A0D2XXB4|A0A0D2XXB4_FUSO4 Eukaryotic translation initiation factor 3 subunit G OS=Fusarium oxysporum f. sp. lycopersici (strain 4287 / CBS 123668 / FGSC 9935 / NRRL 34936) OX=426428 GN=TIF35 PE=3 SV=1	2	2	0.0678	32376	8.55
$798-1	tr|A0A0J9V9W6|A0A0J9V9W6_FUSO4 H/ACA ribonucleoprotein complex subunit NOP10 OS=Fusarium oxysporum f. sp. lycopersici (strain 4287 / CBS 123668 / FGSC 9935 / NRRL 34936) OX=426428 GN=FOXG_19954 PE=3 SV=1	2	2	0.2131	7244.29	10.43
$799-1	tr|A0A0J9VAW7|A0A0J9VAW7_FUSO4 Transcriptional adapter 2 OS=Fusarium oxysporum f. sp. lycopersici (strain 4287 / CBS 123668 / FGSC 9935 / NRRL 34936) OX=426428 GN=FOXG_09215 PE=4 SV=1	2	2	0.0224	60304.6	6
$799-2	tr|A0A0D2XYZ3|A0A0D2XYZ3_FUSO4 Transcriptional adapter 2 OS=Fusarium oxysporum f. sp. lycopersici (strain 4287 / CBS 123668 / FGSC 9935 / NRRL 34936) OX=426428 PE=4 SV=1	2	2	0.0205	65212	5.96
$800-1	tr|A0A0J9VB06|A0A0J9VB06_FUSO4 USP domain-containing protein OS=Fusarium oxysporum f. sp. lycopersici (strain 4287 / CBS 123668 / FGSC 9935 / NRRL 34936) OX=426428 GN=FOXG_09439 PE=4 SV=1	2	2	0.007	290642	5.35
$800-2	tr|A0A0J9VCI0|A0A0J9VCI0_FUSO4 USP domain-containing protein OS=Fusarium oxysporum f. sp. lycopersici (strain 4287 / CBS 123668 / FGSC 9935 / NRRL 34936) OX=426428 GN=FOXG_09439 PE=4 SV=1	2	2	0.007	292464	5.27
$801-1	tr|A0A0J9VBT0|A0A0J9VBT0_FUSO4 Serine/threonine-protein kinase Tel1 OS=Fusarium oxysporum f. sp. lycopersici (strain 4287 / CBS 123668 / FGSC 9935 / NRRL 34936) OX=426428 GN=FOXG_20040 PE=3 SV=1	2	2	0.0053	317308	6.22
$802-1	tr|A0A0J9VCR1|A0A0J9VCR1_FUSO4 Peptidase_S8 domain-containing protein OS=Fusarium oxysporum f. sp. lycopersici (strain 4287 / CBS 123668 / FGSC 9935 / NRRL 34936) OX=426428 GN=FOXG_09594 PE=3 SV=1	2	2	0.0165	110219	5.49
$803-1	tr|A0A0J9VDB5|A0A0J9VDB5_FUSO4 Uncharacterized protein OS=Fusarium oxysporum f. sp. lycopersici (strain 4287 / CBS 123668 / FGSC 9935 / NRRL 34936) OX=426428 GN=FOXG_09983 PE=4 SV=1	2	2	0.0166	100687	5.82
$804-1	tr|A0A0J9VE00|A0A0J9VE00_FUSO4 NAD(P)H dehydrogenase (Quinone) OS=Fusarium oxysporum f. sp. lycopersici (strain 4287 / CBS 123668 / FGSC 9935 / NRRL 34936) OX=426428 GN=FOXG_09890 PE=4 SV=1	2	2	0.0244	32499.5	6.11
$805-1	tr|A0A0J9VFN0|A0A0J9VFN0_FUSO4 VPS9 domain-containing protein OS=Fusarium oxysporum f. sp. lycopersici (strain 4287 / CBS 123668 / FGSC 9935 / NRRL 34936) OX=426428 GN=FOXG_10280 PE=3 SV=1	2	2	0.0153	123153	6.01
$805-2	tr|A0A0J9WPX7|A0A0J9WPX7_FUSO4 VPS9 domain-containing protein OS=Fusarium oxysporum f. sp. lycopersici (strain 4287 / CBS 123668 / FGSC 9935 / NRRL 34936) OX=426428 GN=FOXG_10280 PE=3 SV=1	2	2	0.0129	146663	6.03
$806-1	tr|A0A0J9VGI8|A0A0J9VGI8_FUSO4 Ras-like protein Rab-6B OS=Fusarium oxysporum f. sp. lycopersici (strain 4287 / CBS 123668 / FGSC 9935 / NRRL 34936) OX=426428 GN=FOXG_10439 PE=4 SV=1	2	2	0.2418	17155.1	5.88
$806-2	tr|A0A0J9VFI1|A0A0J9VFI1_FUSO4 Ras-like protein Rab-6B OS=Fusarium oxysporum f. sp. lycopersici (strain 4287 / CBS 123668 / FGSC 9935 / NRRL 34936) OX=426428 GN=FOXG_10439 PE=4 SV=1	2	2	0.2126	19597.8	5.26
$806-3	tr|A0A0D2Y2E3|A0A0D2Y2E3_FUSO4 Ras-like protein Rab-6B OS=Fusarium oxysporum f. sp. lycopersici (strain 4287 / CBS 123668 / FGSC 9935 / NRRL 34936) OX=426428 GN=FOXG_10439 PE=4 SV=1	2	2	0.1779	23327.1	7.69
$807-1	tr|A0A0J9VI54|A0A0J9VI54_FUSO4 Glutamine synthetase OS=Fusarium oxysporum f. sp. lycopersici (strain 4287 / CBS 123668 / FGSC 9935 / NRRL 34936) OX=426428 GN=FOXG_10902 PE=3 SV=1	2	2	0.0291	56725.6	6.14
$808-1	tr|A0A0J9VIT1|A0A0J9VIT1_FUSO4 Uncharacterized protein OS=Fusarium oxysporum f. sp. lycopersici (strain 4287 / CBS 123668 / FGSC 9935 / NRRL 34936) OX=426428 GN=FOXG_11171 PE=3 SV=1	2	2	0.059	42088.1	10.6
$808-2	tr|A0A0D2Y4G8|A0A0D2Y4G8_FUSO4 Uncharacterized protein OS=Fusarium oxysporum f. sp. lycopersici (strain 4287 / CBS 123668 / FGSC 9935 / NRRL 34936) OX=426428 PE=3 SV=1	2	2	0.0693	36137.4	10.85
$809-1	tr|A0A0J9VMP8|A0A0J9VMP8_FUSO4 Uncharacterized protein OS=Fusarium oxysporum f. sp. lycopersici (strain 4287 / CBS 123668 / FGSC 9935 / NRRL 34936) OX=426428 GN=FOXG_11892 PE=4 SV=1	2	2	0.0077	270769	5.77
$809-2	tr|A0A0D2Y6I2|A0A0D2Y6I2_FUSO4 Uncharacterized protein OS=Fusarium oxysporum f. sp. lycopersici (strain 4287 / CBS 123668 / FGSC 9935 / NRRL 34936) OX=426428 PE=4 SV=1	2	2	0.0078	268175	5.75
$810-1	tr|A0A0J9VNC2|A0A0J9VNC2_FUSO4 Uncharacterized protein OS=Fusarium oxysporum f. sp. lycopersici (strain 4287 / CBS 123668 / FGSC 9935 / NRRL 34936) OX=426428 GN=FOXG_12172 PE=3 SV=1	2	2	0.0583	36098.5	6.31
$810-2	tr|A0A0D2Y7B0|A0A0D2Y7B0_FUSO4 Uncharacterized protein OS=Fusarium oxysporum f. sp. lycopersici (strain 4287 / CBS 123668 / FGSC 9935 / NRRL 34936) OX=426428 GN=FOXG_12172 PE=3 SV=1	2	2	0.0472	44229	8.65
$811-1	tr|A0A0J9VPD4|A0A0J9VPD4_FUSO4 Neurofibromin 1 OS=Fusarium oxysporum f. sp. lycopersici (strain 4287 / CBS 123668 / FGSC 9935 / NRRL 34936) OX=426428 GN=FOXG_12635 PE=4 SV=1	2	2	0.0056	198887	6.58
$812-1	tr|A0A0J9VQ09|A0A0J9VQ09_FUSO4 Rav1p_C domain-containing protein OS=Fusarium oxysporum f. sp. lycopersici (strain 4287 / CBS 123668 / FGSC 9935 / NRRL 34936) OX=426428 GN=FOXG_12640 PE=4 SV=1	2	2	0.016	119727	6.4
$812-2	tr|A0A0J9VQH8|A0A0J9VQH8_FUSO4 Rav1p_C domain-containing protein OS=Fusarium oxysporum f. sp. lycopersici (strain 4287 / CBS 123668 / FGSC 9935 / NRRL 34936) OX=426428 GN=FOXG_12640 PE=4 SV=1	2	2	0.0129	149003	6.25
$812-3	tr|A0A0D2Y8M4|A0A0D2Y8M4_FUSO4 Rav1p_C domain-containing protein OS=Fusarium oxysporum f. sp. lycopersici (strain 4287 / CBS 123668 / FGSC 9935 / NRRL 34936) OX=426428 PE=4 SV=1	2	2	0.0131	146999	6.32
$813-1	tr|A0A0J9VR80|A0A0J9VR80_FUSO4 Vesicle transport through interaction with t-SNAREs 1 OS=Fusarium oxysporum f. sp. lycopersici (strain 4287 / CBS 123668 / FGSC 9935 / NRRL 34936) OX=426428 GN=FOXG_12782 PE=3 SV=1	2	2	0.0854	22309.5	5.4
$813-2	tr|A0A0D2Y914|A0A0D2Y914_FUSO4 Vesicle transport through interaction with t-SNAREs 1 OS=Fusarium oxysporum f. sp. lycopersici (strain 4287 / CBS 123668 / FGSC 9935 / NRRL 34936) OX=426428 GN=FOXG_12782 PE=3 SV=1	2	2	0.0749	25417.4	6.22
$814-1	tr|A0A0J9VTT5|A0A0J9VTT5_FUSO4 Uncharacterized protein OS=Fusarium oxysporum f. sp. lycopersici (strain 4287 / CBS 123668 / FGSC 9935 / NRRL 34936) OX=426428 GN=FOXG_13080 PE=4 SV=1	2	2	0.0117	132539	5.55
$814-2	tr|A0A0D2Y9V9|A0A0D2Y9V9_FUSO4 Uncharacterized protein OS=Fusarium oxysporum f. sp. lycopersici (strain 4287 / CBS 123668 / FGSC 9935 / NRRL 34936) OX=426428 PE=4 SV=1	2	2	0.0118	131462	5.55
$815-1	tr|A0A0J9VYW8|A0A0J9VYW8_FUSO4 NACHT domain-containing protein OS=Fusarium oxysporum f. sp. lycopersici (strain 4287 / CBS 123668 / FGSC 9935 / NRRL 34936) OX=426428 GN=FOXG_14506 PE=4 SV=1	2	2	0.0094	166255	5.53
$815-2	tr|A0A0D2YDX0|A0A0D2YDX0_FUSO4 Uncharacterized protein OS=Fusarium oxysporum f. sp. lycopersici (strain 4287 / CBS 123668 / FGSC 9935 / NRRL 34936) OX=426428 PE=4 SV=1	2	2	0.0143	110329	5.66
$816-1	tr|A0A0J9W038|A0A0J9W038_FUSO4 Uncharacterized protein OS=Fusarium oxysporum f. sp. lycopersici (strain 4287 / CBS 123668 / FGSC 9935 / NRRL 34936) OX=426428 GN=FOXG_21656 PE=4 SV=1	2	2	0.0588	11320.4	5.4
$817-1	tr|A0A0J9W2I7|A0A0J9W2I7_FUSO4 FMN hydroxy acid dehydrogenase domain-containing protein OS=Fusarium oxysporum f. sp. lycopersici (strain 4287 / CBS 123668 / FGSC 9935 / NRRL 34936) OX=426428 GN=FOXG_15238 PE=3 SV=1	2	2	0.0489	36875.7	5.85
$817-2	tr|A0A1D6QVK5|A0A1D6QVK5_FUSO4 FMN hydroxy acid dehydrogenase domain-containing protein OS=Fusarium oxysporum f. sp. lycopersici (strain 4287 / CBS 123668 / FGSC 9935 / NRRL 34936) OX=426428 PE=3 SV=1	2	2	0.0456	39719.8	6.44
$817-3	sp|A0A0D2YG00|FUB9_FUSO4 Oxidase FUB9 OS=Fusarium oxysporum f. sp. lycopersici (strain 4287 / CBS 123668 / FGSC 9935 / NRRL 34936) OX=426428 GN=FUB8 PE=1 SV=2	2	2	0.0439	41273.6	6.91
$818-1	tr|A0A0J9W3P5|A0A0J9W3P5_FUSO4 Uncharacterized protein OS=Fusarium oxysporum f. sp. lycopersici (strain 4287 / CBS 123668 / FGSC 9935 / NRRL 34936) OX=426428 GN=FOXG_22007 PE=4 SV=1	2	2	0.0474	46035.2	5.47
$819-1	tr|A0A0J9W503|A0A0J9W503_FUSO4 Uncharacterized protein OS=Fusarium oxysporum f. sp. lycopersici (strain 4287 / CBS 123668 / FGSC 9935 / NRRL 34936) OX=426428 GN=FOXG_15588 PE=4 SV=1	2	2	0.0189	71992.8	6.25
$820-1	tr|A0A0J9W674|A0A0J9W674_FUSO4 F-box domain-containing protein OS=Fusarium oxysporum f. sp. lycopersici (strain 4287 / CBS 123668 / FGSC 9935 / NRRL 34936) OX=426428 GN=FOXG_15832 PE=4 SV=1	2	2	0.0356	58611.6	4.99
$820-2	tr|A0A0D2YHN6|A0A0D2YHN6_FUSO4 F-box domain-containing protein OS=Fusarium oxysporum f. sp. lycopersici (strain 4287 / CBS 123668 / FGSC 9935 / NRRL 34936) OX=426428 PE=4 SV=1	2	2	0.0497	41806.1	5.16
$821-1	tr|A0A0J9W6H2|A0A0J9W6H2_FUSO4 Carrier domain-containing protein OS=Fusarium oxysporum f. sp. lycopersici (strain 4287 / CBS 123668 / FGSC 9935 / NRRL 34936) OX=426428 GN=FOXG_15886 PE=4 SV=1	2	2	0.0085	272317	5.65
$821-2	tr|A0A0J9W1I8|A0A0J9W1I8_FUSO4 Carrier domain-containing protein OS=Fusarium oxysporum f. sp. lycopersici (strain 4287 / CBS 123668 / FGSC 9935 / NRRL 34936) OX=426428 GN=FOXG_14850 PE=4 SV=1	2	2	0.0084	276403	5.62
$821-3	tr|A0A0D2YHU0|A0A0D2YHU0_FUSO4 Carrier domain-containing protein OS=Fusarium oxysporum f. sp. lycopersici (strain 4287 / CBS 123668 / FGSC 9935 / NRRL 34936) OX=426428 PE=4 SV=1	2	2	0.0097	238242	5.52
$821-4	tr|A0A0D2YEW2|A0A0D2YEW2_FUSO4 Carrier domain-containing protein OS=Fusarium oxysporum f. sp. lycopersici (strain 4287 / CBS 123668 / FGSC 9935 / NRRL 34936) OX=426428 PE=4 SV=1	2	2	0.0096	239869	5.51
$822-1	tr|A0A0J9W9Q4|A0A0J9W9Q4_FUSO4 Uncharacterized protein OS=Fusarium oxysporum f. sp. lycopersici (strain 4287 / CBS 123668 / FGSC 9935 / NRRL 34936) OX=426428 GN=FOXG_16846 PE=4 SV=1	2	2	0.0413	66877.8	6.08
$822-2	tr|A0A0D2YJY0|A0A0D2YJY0_FUSO4 Uncharacterized protein OS=Fusarium oxysporum f. sp. lycopersici (strain 4287 / CBS 123668 / FGSC 9935 / NRRL 34936) OX=426428 PE=4 SV=1	2	2	0.0445	61974.2	5.94
$823-1	tr|A0A0J9WA71|A0A0J9WA71_FUSO4 Uncharacterized protein OS=Fusarium oxysporum f. sp. lycopersici (strain 4287 / CBS 123668 / FGSC 9935 / NRRL 34936) OX=426428 GN=FOXG_22554 PE=4 SV=1	2	2	0.0065	259375	9.32
$824-1	tr|A0A0J9WBD4|A0A0J9WBD4_FUSO4 Uncharacterized protein OS=Fusarium oxysporum f. sp. lycopersici (strain 4287 / CBS 123668 / FGSC 9935 / NRRL 34936) OX=426428 GN=FOXG_17032 PE=4 SV=1	2	2	0.011	143290	5.96
$825-1	tr|A0A0J9WDG0|A0A0J9WDG0_FUSO4 FtsJ domain-containing protein OS=Fusarium oxysporum f. sp. lycopersici (strain 4287 / CBS 123668 / FGSC 9935 / NRRL 34936) OX=426428 GN=FOXG_17689 PE=4 SV=1	2	2	0.0373	42364.4	9.2
$826-1	tr|A0A0J9WGC4|A0A0J9WGC4_FUSO4 Nucleolar protein 12 OS=Fusarium oxysporum f. sp. lycopersici (strain 4287 / CBS 123668 / FGSC 9935 / NRRL 34936) OX=426428 GN=FOXG_00654 PE=3 SV=1	2	2	0.0334	49350.9	9.79
$826-2	tr|A0A0J9U7J0|A0A0J9U7J0_FUSO4 Nucleolar protein 12 OS=Fusarium oxysporum f. sp. lycopersici (strain 4287 / CBS 123668 / FGSC 9935 / NRRL 34936) OX=426428 GN=FOXG_00654 PE=3 SV=1	2	2	0.0248	66492.9	6.74
$826-3	tr|A0A0D2X9T9|A0A0D2X9T9_FUSO4 Nucleolar protein 12 OS=Fusarium oxysporum f. sp. lycopersici (strain 4287 / CBS 123668 / FGSC 9935 / NRRL 34936) OX=426428 GN=FOXG_00654 PE=3 SV=1	2	2	0.0268	61404.4	7.67
$827-1	tr|A0A0J9WGD0|A0A0J9WGD0_FUSO4 Phosphoglucomutase OS=Fusarium oxysporum f. sp. lycopersici (strain 4287 / CBS 123668 / FGSC 9935 / NRRL 34936) OX=426428 GN=FOXG_00670 PE=3 SV=1	2	2	0.0362	59735.5	5.23
$828-1	tr|A0A0J9WHP6|A0A0J9WHP6_FUSO4 DNA polymerase theta subunit OS=Fusarium oxysporum f. sp. lycopersici (strain 4287 / CBS 123668 / FGSC 9935 / NRRL 34936) OX=426428 GN=FOXG_18222 PE=4 SV=1	2	2	0.0176	101211	8.22
$828-2	tr|A0A0J9UGA4|A0A0J9UGA4_FUSO4 DNA polymerase theta subunit OS=Fusarium oxysporum f. sp. lycopersici (strain 4287 / CBS 123668 / FGSC 9935 / NRRL 34936) OX=426428 GN=FOXG_18222 PE=4 SV=1	2	2	0.0174	102142	7.85
$829-1	tr|A0A0J9WHU4|A0A0J9WHU4_FUSO4 Uncharacterized protein OS=Fusarium oxysporum f. sp. lycopersici (strain 4287 / CBS 123668 / FGSC 9935 / NRRL 34936) OX=426428 GN=FOXG_02107 PE=4 SV=1	2	2	0.0179	159750	9.1
$829-2	tr|A0A0D2XDX6|A0A0D2XDX6_FUSO4 Uncharacterized protein OS=Fusarium oxysporum f. sp. lycopersici (strain 4287 / CBS 123668 / FGSC 9935 / NRRL 34936) OX=426428 PE=4 SV=1	2	2	0.0235	122217	9.4
$830-1	tr|A0A0J9WI21|A0A0J9WI21_FUSO4 Uncharacterized protein OS=Fusarium oxysporum f. sp. lycopersici (strain 4287 / CBS 123668 / FGSC 9935 / NRRL 34936) OX=426428 GN=FOXG_02320 PE=4 SV=1	2	2	0.0214	93203.9	9.65
$830-2	tr|A0A0J9UEH5|A0A0J9UEH5_FUSO4 Uncharacterized protein OS=Fusarium oxysporum f. sp. lycopersici (strain 4287 / CBS 123668 / FGSC 9935 / NRRL 34936) OX=426428 GN=FOXG_02320 PE=4 SV=1	2	2	0.0238	84223.6	9.69
$831-1	tr|A0A0J9WID6|A0A0J9WID6_FUSO4 Uncharacterized protein OS=Fusarium oxysporum f. sp. lycopersici (strain 4287 / CBS 123668 / FGSC 9935 / NRRL 34936) OX=426428 GN=FOXG_18392 PE=4 SV=1	2	2	0.0043	381634	5.72
$832-1	tr|A0A0J9WKL6|A0A0J9WKL6_FUSO4 Uncharacterized protein OS=Fusarium oxysporum f. sp. lycopersici (strain 4287 / CBS 123668 / FGSC 9935 / NRRL 34936) OX=426428 GN=FOXG_19006 PE=4 SV=1	2	2	0.1839	9409.95	10.89
$833-1	tr|A0A0J9WKS2|A0A0J9WKS2_FUSO4 Uncharacterized protein OS=Fusarium oxysporum f. sp. lycopersici (strain 4287 / CBS 123668 / FGSC 9935 / NRRL 34936) OX=426428 GN=FOXG_05364 PE=3 SV=1	2	2	0.05	45035.4	9.17
$833-2	tr|A0A0D2XN35|A0A0D2XN35_FUSO4 Uncharacterized protein OS=Fusarium oxysporum f. sp. lycopersici (strain 4287 / CBS 123668 / FGSC 9935 / NRRL 34936) OX=426428 GN=FOXG_05364 PE=3 SV=1	2	2	0.0468	47638.2	9.16
$834-1	tr|A0A0J9WMI4|A0A0J9WMI4_FUSO4 TPT domain-containing protein OS=Fusarium oxysporum f. sp. lycopersici (strain 4287 / CBS 123668 / FGSC 9935 / NRRL 34936) OX=426428 GN=FOXG_07819 PE=4 SV=1	2	2	0.0455	45979.4	8.23
$834-2	tr|A0A0J9V214|A0A0J9V214_FUSO4 TPT domain-containing protein OS=Fusarium oxysporum f. sp. lycopersici (strain 4287 / CBS 123668 / FGSC 9935 / NRRL 34936) OX=426428 GN=FOXG_07819 PE=4 SV=1	2	2	0.0499	42145.2	8.55
$834-3	tr|A0A0D2XV11|A0A0D2XV11_FUSO4 TPT domain-containing protein OS=Fusarium oxysporum f. sp. lycopersici (strain 4287 / CBS 123668 / FGSC 9935 / NRRL 34936) OX=426428 GN=FOXG_07819 PE=4 SV=1	2	2	0.0475	44034.2	7.68
$835-1	tr|A0A0J9WPA8|A0A0J9WPA8_FUSO4 Protein phosphatase 2 (Formerly 2A), regulatory subunit A OS=Fusarium oxysporum f. sp. lycopersici (strain 4287 / CBS 123668 / FGSC 9935 / NRRL 34936) OX=426428 GN=FOXG_09468 PE=4 SV=1	2	2	0.035	57083.2	4.92
$835-2	tr|A0A0D2XZN7|A0A0D2XZN7_FUSO4 Uncharacterized protein OS=Fusarium oxysporum f. sp. lycopersici (strain 4287 / CBS 123668 / FGSC 9935 / NRRL 34936) OX=426428 PE=4 SV=1	2	2	0.029	68697.1	4.68
$836-1	tr|A0A0J9WPK3|A0A0J9WPK3_FUSO4 POT family proton-dependent oligopeptide transporter OS=Fusarium oxysporum f. sp. lycopersici (strain 4287 / CBS 123668 / FGSC 9935 / NRRL 34936) OX=426428 GN=FOXG_09811 PE=3 SV=1	2	2	0.0247	80950.3	6.85
$836-2	tr|A0A0D2Y0M1|A0A0D2Y0M1_FUSO4 Uncharacterized protein OS=Fusarium oxysporum f. sp. lycopersici (strain 4287 / CBS 123668 / FGSC 9935 / NRRL 34936) OX=426428 PE=3 SV=1	2	2	0.0301	66489.8	6.09
$837-1	tr|A0A0J9WQI8|A0A0J9WQI8_FUSO4 Fungal_trans domain-containing protein OS=Fusarium oxysporum f. sp. lycopersici (strain 4287 / CBS 123668 / FGSC 9935 / NRRL 34936) OX=426428 GN=FOXG_20416 PE=4 SV=1	2	2	0.0255	78270	5.81
$837-2	tr|A0A0J9VJB4|A0A0J9VJB4_FUSO4 Zn(2)-C6 fungal-type domain-containing protein OS=Fusarium oxysporum f. sp. lycopersici (strain 4287 / CBS 123668 / FGSC 9935 / NRRL 34936) OX=426428 GN=FOXG_20416 PE=4 SV=1	2	2	0.0222	90086.3	6.39
$837-3	tr|A0A0D2Y3W8|A0A0D2Y3W8_FUSO4 Fungal_trans domain-containing protein OS=Fusarium oxysporum f. sp. lycopersici (strain 4287 / CBS 123668 / FGSC 9935 / NRRL 34936) OX=426428 PE=4 SV=1	2	2	0.0257	77790.4	5.75
$838-1	tr|A0A0J9WVY5|A0A0J9WVY5_FUSO4 Uncharacterized protein OS=Fusarium oxysporum f. sp. lycopersici (strain 4287 / CBS 123668 / FGSC 9935 / NRRL 34936) OX=426428 GN=FOXG_17400 PE=4 SV=1	2	2	0.0205	67458.4	6.19
$838-2	tr|A0A0C4DIY1|A0A0C4DIY1_FUSO4 Uncharacterized protein OS=Fusarium oxysporum f. sp. lycopersici (strain 4287 / CBS 123668 / FGSC 9935 / NRRL 34936) OX=426428 PE=4 SV=1	2	2	0.0236	58873.6	6.33
$839-1	tr|A0A2C8D0U1|A0A2C8D0U1_FUSOX Cytochrome c oxidase subunit 2 OS=Fusarium oxysporum f. sp. lycopersici OX=59765 GN=cox2 PE=3 SV=1	2	2	0.0683	28649.8	4.66
$840-1	tr|Q9HGT3|Q9HGT3_FUSOX Glucanase OS=Fusarium oxysporum f. sp. lycopersici OX=59765 GN=eg-1 PE=3 SV=1	2	2	0.0303	46466.2	8.18
$840-2	tr|A0A0C4DHQ3|A0A0C4DHQ3_FUSO4 Glucanase OS=Fusarium oxysporum f. sp. lycopersici (strain 4287 / CBS 123668 / FGSC 9935 / NRRL 34936) OX=426428 GN=FOXG_02912 PE=3 SV=1	2	2	0.0303	46452.2	8.18
$841-1	tr|A0A0D2XDL3|A0A0D2XDL3_FUSO4 Uncharacterized protein OS=Fusarium oxysporum f. sp. lycopersici (strain 4287 / CBS 123668 / FGSC 9935 / NRRL 34936) OX=426428 PE=4 SV=1	19	1	0.0046	168038	9.11
$841-2	tr|A0A0J9WHP7|A0A0J9WHP7_FUSO4 Uncharacterized protein OS=Fusarium oxysporum f. sp. lycopersici (strain 4287 / CBS 123668 / FGSC 9935 / NRRL 34936) OX=426428 GN=FOXG_01993 PE=4 SV=1	19	1	0.0045	173420	9
$841-3	tr|A0A0J9UGB1|A0A0J9UGB1_FUSO4 Uncharacterized protein OS=Fusarium oxysporum f. sp. lycopersici (strain 4287 / CBS 123668 / FGSC 9935 / NRRL 34936) OX=426428 GN=FOXG_01993 PE=4 SV=1	19	1	0.0044	175460	8.94
$841-4	tr|A0A0J9UGB7|A0A0J9UGB7_FUSO4 Uncharacterized protein OS=Fusarium oxysporum f. sp. lycopersici (strain 4287 / CBS 123668 / FGSC 9935 / NRRL 34936) OX=426428 GN=FOXG_01993 PE=4 SV=1	19	1	0.0063	125656	8.53
$841-5	tr|A0A0J9WHP8|A0A0J9WHP8_FUSO4 Uncharacterized protein OS=Fusarium oxysporum f. sp. lycopersici (strain 4287 / CBS 123668 / FGSC 9935 / NRRL 34936) OX=426428 GN=FOXG_01993 PE=4 SV=1	19	1	0.0064	123616	8.64
$842-1	tr|A0A0J9VJW5|A0A0J9VJW5_FUSO4 Uncharacterized protein OS=Fusarium oxysporum f. sp. lycopersici (strain 4287 / CBS 123668 / FGSC 9935 / NRRL 34936) OX=426428 GN=FOXG_11139 PE=4 SV=1	19	1	0.0154	50422.4	7.13
$842-2	tr|A0A0D2Y4D6|A0A0D2Y4D6_FUSO4 Uncharacterized protein OS=Fusarium oxysporum f. sp. lycopersici (strain 4287 / CBS 123668 / FGSC 9935 / NRRL 34936) OX=426428 GN=FOXG_11139 PE=4 SV=1	19	1	0.0132	59142.2	7.98
$843-1	tr|A0A0D2Y0M8|A0A0D2Y0M8_FUSO4 Abhydrolase_3 domain-containing protein OS=Fusarium oxysporum f. sp. lycopersici (strain 4287 / CBS 123668 / FGSC 9935 / NRRL 34936) OX=426428 PE=4 SV=1	13	1	0.0187	35832.3	5.22
$843-2	tr|A0A0J9VE65|A0A0J9VE65_FUSO4 Abhydrolase_3 domain-containing protein OS=Fusarium oxysporum f. sp. lycopersici (strain 4287 / CBS 123668 / FGSC 9935 / NRRL 34936) OX=426428 GN=FOXG_09818 PE=4 SV=1	13	1	0.0208	31833.7	4.9
$844-1	tr|A0A0D2XB25|A0A0D2XB25_FUSO4 Uncharacterized protein OS=Fusarium oxysporum f. sp. lycopersici (strain 4287 / CBS 123668 / FGSC 9935 / NRRL 34936) OX=426428 GN=FOXG_01092 PE=4 SV=1	11	1	0.04	17161.9	8.72
$845-1	tr|A0A0D2XI74|A0A0D2XI74_FUSO4 Pre-mRNA-splicing factor CWC24 OS=Fusarium oxysporum f. sp. lycopersici (strain 4287 / CBS 123668 / FGSC 9935 / NRRL 34936) OX=426428 GN=FOXG_03625 PE=3 SV=1	8	1	0.0304	36527.5	8.72
$846-1	tr|A0A0J9V0W8|A0A0J9V0W8_FUSO4 Uncharacterized protein OS=Fusarium oxysporum f. sp. lycopersici (strain 4287 / CBS 123668 / FGSC 9935 / NRRL 34936) OX=426428 GN=FOXG_06818 PE=3 SV=1	8	1	0.0118	64768.7	6.4
$847-1	tr|A0A0J9V4B9|A0A0J9V4B9_FUSO4 Translation initiation factor IF-2 OS=Fusarium oxysporum f. sp. lycopersici (strain 4287 / CBS 123668 / FGSC 9935 / NRRL 34936) OX=426428 GN=FOXG_08101 PE=3 SV=1	8	1	0.0068	113230	6.46
$847-2	tr|A0A0D2XVT9|A0A0D2XVT9_FUSO4 Tr-type G domain-containing protein OS=Fusarium oxysporum f. sp. lycopersici (strain 4287 / CBS 123668 / FGSC 9935 / NRRL 34936) OX=426428 PE=3 SV=1	8	1	0.0078	99617.8	5.64
$848-1	sp|A0A0D2YFZ9|FUB10_FUSO4 Fusaric acid cluster transcription factor FUB10 OS=Fusarium oxysporum f. sp. lycopersici (strain 4287 / CBS 123668 / FGSC 9935 / NRRL 34936) OX=426428 GN=FUB10 PE=1 SV=1	7	1	0.0144	45526.7	6.23
$849-1	tr|A0A0D2X8A5|A0A0D2X8A5_FUSO4 PLK protein kinase OS=Fusarium oxysporum f. sp. lycopersici (strain 4287 / CBS 123668 / FGSC 9935 / NRRL 34936) OX=426428 GN=FOXG_00114 PE=4 SV=1	7	1	0.006	112707	9.38
$850-1	tr|A0A0D2XE90|A0A0D2XE90_FUSO4 Uncharacterized protein OS=Fusarium oxysporum f. sp. lycopersici (strain 4287 / CBS 123668 / FGSC 9935 / NRRL 34936) OX=426428 GN=FOXG_02221 PE=4 SV=1	7	1	0.0256	36983.4	5.14
$851-1	tr|A0A0D2XQL7|A0A0D2XQL7_FUSO4 Protein SSH4 OS=Fusarium oxysporum f. sp. lycopersici (strain 4287 / CBS 123668 / FGSC 9935 / NRRL 34936) OX=426428 GN=FOXG_06265 PE=3 SV=1	7	1	0.0164	60842.1	6.03
$852-1	tr|A0A0J9UQK2|A0A0J9UQK2_FUSO4 Zn(2)-C6 fungal-type domain-containing protein OS=Fusarium oxysporum f. sp. lycopersici (strain 4287 / CBS 123668 / FGSC 9935 / NRRL 34936) OX=426428 GN=FOXG_04931 PE=4 SV=1	7	1	0.0141	47993.9	7.99
$852-2	tr|A0A0J9US77|A0A0J9US77_FUSO4 Zn(2)-C6 fungal-type domain-containing protein OS=Fusarium oxysporum f. sp. lycopersici (strain 4287 / CBS 123668 / FGSC 9935 / NRRL 34936) OX=426428 GN=FOXG_04931 PE=4 SV=1	7	1	0.0132	51047.3	7.58
$853-1	tr|A0A0J9W8L3|A0A0J9W8L3_FUSO4 Zn(2)-C6 fungal-type domain-containing protein OS=Fusarium oxysporum f. sp. lycopersici (strain 4287 / CBS 123668 / FGSC 9935 / NRRL 34936) OX=426428 GN=FOXG_16486 PE=4 SV=1	7	1	0.015	59240.4	8.29
$853-2	tr|A0A0D2YIX2|A0A0D2YIX2_FUSO4 Zn(2)-C6 fungal-type domain-containing protein OS=Fusarium oxysporum f. sp. lycopersici (strain 4287 / CBS 123668 / FGSC 9935 / NRRL 34936) OX=426428 PE=4 SV=1	7	1	0.0294	29267.1	9.57
$854-1	tr|A0A0D2XD49|A0A0D2XD49_FUSO4 Uncharacterized protein OS=Fusarium oxysporum f. sp. lycopersici (strain 4287 / CBS 123668 / FGSC 9935 / NRRL 34936) OX=426428 PE=3 SV=1	6	1	0.0079	113917	6.03
$854-2	tr|A0A0J9UD86|A0A0J9UD86_FUSO4 Uncharacterized protein OS=Fusarium oxysporum f. sp. lycopersici (strain 4287 / CBS 123668 / FGSC 9935 / NRRL 34936) OX=426428 GN=FOXG_01824 PE=3 SV=1	6	1	0.0065	138398	6.75
$854-3	tr|A0A0J9UBT5|A0A0J9UBT5_FUSO4 NB-ARC domain-containing protein OS=Fusarium oxysporum f. sp. lycopersici (strain 4287 / CBS 123668 / FGSC 9935 / NRRL 34936) OX=426428 GN=FOXG_01824 PE=4 SV=1	6	1	0.0075	119261	6.53
$855-1	tr|A0A0D2XW41|A0A0D2XW41_FUSO4 LigB domain-containing protein OS=Fusarium oxysporum f. sp. lycopersici (strain 4287 / CBS 123668 / FGSC 9935 / NRRL 34936) OX=426428 GN=FOXG_08205 PE=3 SV=1	6	1	0.018	37067.8	6.15
$856-1	tr|A0A0D2Y2T1|A0A0D2Y2T1_FUSO4 Exocyst complex component SEC15 OS=Fusarium oxysporum f. sp. lycopersici (strain 4287 / CBS 123668 / FGSC 9935 / NRRL 34936) OX=426428 PE=3 SV=1	6	1	0.007	82190.4	5.09
$856-2	tr|A0A0J9VGH4|A0A0J9VGH4_FUSO4 Exocyst complex component SEC15 OS=Fusarium oxysporum f. sp. lycopersici (strain 4287 / CBS 123668 / FGSC 9935 / NRRL 34936) OX=426428 GN=FOXG_10580 PE=3 SV=1	6	1	0.0065	88350.4	4.98
$856-3	tr|A0A0J9UA00|A0A0J9UA00_FUSO4 ATPase OS=Fusarium oxysporum f. sp. lycopersici (strain 4287 / CBS 123668 / FGSC 9935 / NRRL 34936) OX=426428 GN=FOXG_18101 PE=3 SV=1	6	1	0.0052	107806	6.68
$857-1	tr|A0A0D2Y4X8|A0A0D2Y4X8_FUSO4 Uncharacterized protein OS=Fusarium oxysporum f. sp. lycopersici (strain 4287 / CBS 123668 / FGSC 9935 / NRRL 34936) OX=426428 GN=FOXG_11332 PE=4 SV=1	6	1	0.037	20299.6	9.91
$858-1	tr|A0A0J9WB93|A0A0J9WB93_FUSO4 Uncharacterized protein OS=Fusarium oxysporum f. sp. lycopersici (strain 4287 / CBS 123668 / FGSC 9935 / NRRL 34936) OX=426428 GN=FOXG_22640 PE=4 SV=1	6	1	0.0408	16287	5.46
$859-1	tr|A0A0D2XD48|A0A0D2XD48_FUSO4 Uncharacterized protein OS=Fusarium oxysporum f. sp. lycopersici (strain 4287 / CBS 123668 / FGSC 9935 / NRRL 34936) OX=426428 GN=FOXG_01823 PE=4 SV=1	5	1	0.0118	57173.5	6.32
$860-1	tr|A0A0D2XF83|A0A0D2XF83_FUSO4 Uncharacterized protein OS=Fusarium oxysporum f. sp. lycopersici (strain 4287 / CBS 123668 / FGSC 9935 / NRRL 34936) OX=426428 GN=FOXG_02572 PE=4 SV=1	5	1	0.0188	40232	8.84
$861-1	tr|A0A0D2XIQ3|A0A0D2XIQ3_FUSO4 1-acylglycerone phosphate reductase OS=Fusarium oxysporum f. sp. lycopersici (strain 4287 / CBS 123668 / FGSC 9935 / NRRL 34936) OX=426428 GN=FOXG_03810 PE=3 SV=1	5	1	0.0203	32513.2	9.37
$862-1	tr|A0A0D2XUP5|A0A0D2XUP5_FUSO4 Uncharacterized protein OS=Fusarium oxysporum f. sp. lycopersici (strain 4287 / CBS 123668 / FGSC 9935 / NRRL 34936) OX=426428 PE=4 SV=1	5	1	0.0118	55373.9	10.41
$862-2	tr|A0A0J9V2L5|A0A0J9V2L5_FUSO4 Uncharacterized protein OS=Fusarium oxysporum f. sp. lycopersici (strain 4287 / CBS 123668 / FGSC 9935 / NRRL 34936) OX=426428 GN=FOXG_07700 PE=4 SV=1	5	1	0.0132	49466.3	10.56
$863-1	tr|A0A0D2XW08|A0A0D2XW08_FUSO4 Histone H2B OS=Fusarium oxysporum f. sp. lycopersici (strain 4287 / CBS 123668 / FGSC 9935 / NRRL 34936) OX=426428 PE=3 SV=1	5	1	0.1356	6384.17	9.7
$863-2	tr|A0A0J9WMU1|A0A0J9WMU1_FUSO4 Histone H2B (Fragment) OS=Fusarium oxysporum f. sp. lycopersici (strain 4287 / CBS 123668 / FGSC 9935 / NRRL 34936) OX=426428 GN=FOXG_08172 PE=3 SV=1	5	1	0.1194	7196.05	9.46
$864-1	tr|A0A0D2Y443|A0A0D2Y443_FUSO4 Uncharacterized protein OS=Fusarium oxysporum f. sp. lycopersici (strain 4287 / CBS 123668 / FGSC 9935 / NRRL 34936) OX=426428 GN=FOXG_11045 PE=4 SV=1	5	1	0.0129	62344.2	9.12
$865-1	tr|A0A0D2Y5X9|A0A0D2Y5X9_FUSO4 YrdC-like domain-containing protein OS=Fusarium oxysporum f. sp. lycopersici (strain 4287 / CBS 123668 / FGSC 9935 / NRRL 34936) OX=426428 PE=3 SV=1	5	1	0.0275	28114.6	5.87
$865-2	tr|A0A0J9VLA8|A0A0J9VLA8_FUSO4 YrdC-like domain-containing protein OS=Fusarium oxysporum f. sp. lycopersici (strain 4287 / CBS 123668 / FGSC 9935 / NRRL 34936) OX=426428 GN=FOXG_11685 PE=3 SV=1	5	1	0.0272	28341.9	5.87
$866-1	tr|A0A0J9VZS6|A0A0J9VZS6_FUSO4 Uncharacterized protein OS=Fusarium oxysporum f. sp. lycopersici (strain 4287 / CBS 123668 / FGSC 9935 / NRRL 34936) OX=426428 GN=FOXG_21569 PE=4 SV=1	5	1	0.1263	10433.6	6.93
$867-1	tr|A0A0J9W0W9|A0A0J9W0W9_FUSO4 Uncharacterized protein OS=Fusarium oxysporum f. sp. lycopersici (strain 4287 / CBS 123668 / FGSC 9935 / NRRL 34936) OX=426428 GN=FOXG_14476 PE=4 SV=1	5	1	0.0108	121006	5.64
$867-2	tr|A0A0J9W628|A0A0J9W628_FUSO4 Uncharacterized protein OS=Fusarium oxysporum f. sp. lycopersici (strain 4287 / CBS 123668 / FGSC 9935 / NRRL 34936) OX=426428 GN=FOXG_15927 PE=4 SV=1	5	1	0.0108	121160	5.42
$868-1	tr|A0A0J9W808|A0A0J9W808_FUSO4 L-lactate dehydrogenase OS=Fusarium oxysporum f. sp. lycopersici (strain 4287 / CBS 123668 / FGSC 9935 / NRRL 34936) OX=426428 GN=FOXG_06760 PE=3 SV=1	5	1	0.0153	34985.8	7.62
$868-2	tr|A0A0J9WLU0|A0A0J9WLU0_FUSO4 L-lactate dehydrogenase OS=Fusarium oxysporum f. sp. lycopersici (strain 4287 / CBS 123668 / FGSC 9935 / NRRL 34936) OX=426428 GN=FOXG_06502 PE=3 SV=1	5	1	0.0143	37716	8.44
$868-3	tr|A0A0J9UZN1|A0A0J9UZN1_FUSO4 L-lactate dehydrogenase OS=Fusarium oxysporum f. sp. lycopersici (strain 4287 / CBS 123668 / FGSC 9935 / NRRL 34936) OX=426428 GN=FOXG_06502 PE=3 SV=1	5	1	0.0147	36727.8	8.25
$869-1	tr|A0A0J9WBS6|A0A0J9WBS6_FUSO4 Abhydrolase_3 domain-containing protein OS=Fusarium oxysporum f. sp. lycopersici (strain 4287 / CBS 123668 / FGSC 9935 / NRRL 34936) OX=426428 GN=FOXG_17346 PE=4 SV=1	5	1	0.0252	34837.4	5.82
$869-2	tr|A0A0C4DIS7|A0A0C4DIS7_FUSO4 Abhydrolase_3 domain-containing protein OS=Fusarium oxysporum f. sp. lycopersici (strain 4287 / CBS 123668 / FGSC 9935 / NRRL 34936) OX=426428 PE=4 SV=1	5	1	0.0516	16928.2	4.97
$870-1	tr|A0A0J9WNC2|A0A0J9WNC2_FUSO4 Uncharacterized protein OS=Fusarium oxysporum f. sp. lycopersici (strain 4287 / CBS 123668 / FGSC 9935 / NRRL 34936) OX=426428 GN=FOXG_19799 PE=4 SV=1	5	1	0.1579	4309.88	6.51
$871-1	tr|A0A0D2XE62|A0A0D2XE62_FUSO4 DSBA domain-containing protein OS=Fusarium oxysporum f. sp. lycopersici (strain 4287 / CBS 123668 / FGSC 9935 / NRRL 34936) OX=426428 GN=FOXG_02193 PE=4 SV=1	4	1	0.0255	26299.9	7.79
$872-1	tr|A0A0D2Y6T7|A0A0D2Y6T7_FUSO4 PKS_ER domain-containing protein OS=Fusarium oxysporum f. sp. lycopersici (strain 4287 / CBS 123668 / FGSC 9935 / NRRL 34936) OX=426428 GN=FOXG_11997 PE=3 SV=1	4	1	0.0206	36609.4	6.04
$873-1	tr|A0A0D2Y9F2|A0A0D2Y9F2_FUSO4 Uncharacterized protein OS=Fusarium oxysporum f. sp. lycopersici (strain 4287 / CBS 123668 / FGSC 9935 / NRRL 34936) OX=426428 GN=FOXG_12922 PE=4 SV=1	4	1	0.0119	76312.5	5.78
$874-1	tr|A0A0J9US26|A0A0J9US26_FUSO4 dCMP deaminase OS=Fusarium oxysporum f. sp. lycopersici (strain 4287 / CBS 123668 / FGSC 9935 / NRRL 34936) OX=426428 GN=FOXG_05142 PE=3 SV=1	4	1	0.0207	42702.1	7.15
$874-2	tr|A0A0J9UUK7|A0A0J9UUK7_FUSO4 dCMP deaminase OS=Fusarium oxysporum f. sp. lycopersici (strain 4287 / CBS 123668 / FGSC 9935 / NRRL 34936) OX=426428 GN=FOXG_05142 PE=3 SV=1	4	1	0.0213	41353.4	7.53
$874-3	tr|A0A0D2XMG5|A0A0D2XMG5_FUSO4 CMP/dCMP-type deaminase domain-containing protein OS=Fusarium oxysporum f. sp. lycopersici (strain 4287 / CBS 123668 / FGSC 9935 / NRRL 34936) OX=426428 PE=3 SV=1	4	1	0.0191	46484.3	6.93
$875-1	tr|A0A0J9VRW1|A0A0J9VRW1_FUSO4 Uncharacterized protein OS=Fusarium oxysporum f. sp. lycopersici (strain 4287 / CBS 123668 / FGSC 9935 / NRRL 34936) OX=426428 GN=FOXG_12438 PE=4 SV=1	4	1	0.0086	93753.6	6.23
$875-2	tr|A0A0D2YCR7|A0A0D2YCR7_FUSO4 Uncharacterized protein OS=Fusarium oxysporum f. sp. lycopersici (strain 4287 / CBS 123668 / FGSC 9935 / NRRL 34936) OX=426428 PE=4 SV=1	4	1	0.0082	98148.4	6.37
$876-1	tr|A0A0J9VVA6|A0A0J9VVA6_FUSO4 DAO domain-containing protein OS=Fusarium oxysporum f. sp. lycopersici (strain 4287 / CBS 123668 / FGSC 9935 / NRRL 34936) OX=426428 GN=FOXG_13467 PE=4 SV=1	4	1	0.0222	38932.6	5.56
$876-2	tr|A0A0D2YAY9|A0A0D2YAY9_FUSO4 DAO domain-containing protein OS=Fusarium oxysporum f. sp. lycopersici (strain 4287 / CBS 123668 / FGSC 9935 / NRRL 34936) OX=426428 PE=4 SV=1	4	1	0.0245	35310.5	5.57
$877-1	tr|A0A0J9W8N0|A0A0J9W8N0_FUSO4 NACHT domain-containing protein OS=Fusarium oxysporum f. sp. lycopersici (strain 4287 / CBS 123668 / FGSC 9935 / NRRL 34936) OX=426428 GN=FOXG_16501 PE=4 SV=1	4	1	0.0051	134083	5.3
$877-2	tr|A0A0D2YIY7|A0A0D2YIY7_FUSO4 NACHT domain-containing protein OS=Fusarium oxysporum f. sp. lycopersici (strain 4287 / CBS 123668 / FGSC 9935 / NRRL 34936) OX=426428 PE=4 SV=1	4	1	0.0112	60783.7	5.57
$878-1	tr|A0A0J9WDE3|A0A0J9WDE3_FUSO4 Lysophospholipase OS=Fusarium oxysporum f. sp. lycopersici (strain 4287 / CBS 123668 / FGSC 9935 / NRRL 34936) OX=426428 GN=FOXG_17628 PE=3 SV=1	4	1	0.0157	55187.7	4.42
$879-1	tr|A0A0C4DIL3|A0A0C4DIL3_FUSO4 Uncharacterized protein OS=Fusarium oxysporum f. sp. lycopersici (strain 4287 / CBS 123668 / FGSC 9935 / NRRL 34936) OX=426428 PE=4 SV=1	3	1	0.0467	17170.4	5.73
$879-2	tr|A0A0J9WBV7|A0A0J9WBV7_FUSO4 Uncharacterized protein OS=Fusarium oxysporum f. sp. lycopersici (strain 4287 / CBS 123668 / FGSC 9935 / NRRL 34936) OX=426428 GN=FOXG_22705 PE=4 SV=1	3	1	0.0155	51334.1	5.95
$880-1	tr|A0A0D2XBJ1|A0A0D2XBJ1_FUSO4 Uncharacterized protein OS=Fusarium oxysporum f. sp. lycopersici (strain 4287 / CBS 123668 / FGSC 9935 / NRRL 34936) OX=426428 GN=FOXG_01261 PE=4 SV=1	3	1	0.0086	76263.4	5.81
$881-1	tr|A0A0D2XE69|A0A0D2XE69_FUSO4 Uncharacterized protein OS=Fusarium oxysporum f. sp. lycopersici (strain 4287 / CBS 123668 / FGSC 9935 / NRRL 34936) OX=426428 PE=4 SV=1	3	1	0.0249	31929.4	6.47
$882-1	tr|A0A0D2XHA6|A0A0D2XHA6_FUSO4 Uncharacterized protein OS=Fusarium oxysporum f. sp. lycopersici (strain 4287 / CBS 123668 / FGSC 9935 / NRRL 34936) OX=426428 GN=FOXG_03304 PE=4 SV=1	3	1	0.0247	32225.3	5.88
$883-1	tr|A0A0D2XM48|A0A0D2XM48_FUSO4 Mur_ligase_M domain-containing protein OS=Fusarium oxysporum f. sp. lycopersici (strain 4287 / CBS 123668 / FGSC 9935 / NRRL 34936) OX=426428 GN=FOXG_05023 PE=3 SV=1	3	1	0.0147	76958.4	9.8
$884-1	tr|A0A0D2XPJ4|A0A0D2XPJ4_FUSO4 D-malate dehydrogenase [decarboxylating] OS=Fusarium oxysporum f. sp. lycopersici (strain 4287 / CBS 123668 / FGSC 9935 / NRRL 34936) OX=426428 GN=FOXG_05882 PE=3 SV=1	3	1	0.0244	39851.8	5.77
$885-1	tr|A0A0D2XVV7|A0A0D2XVV7_FUSO4 Uncharacterized protein OS=Fusarium oxysporum f. sp. lycopersici (strain 4287 / CBS 123668 / FGSC 9935 / NRRL 34936) OX=426428 GN=FOXG_08119 PE=4 SV=1	3	1	0.0113	58551	8.13
$886-1	tr|A0A0D2XXF4|A0A0D2XXF4_FUSO4 Uncharacterized protein OS=Fusarium oxysporum f. sp. lycopersici (strain 4287 / CBS 123668 / FGSC 9935 / NRRL 34936) OX=426428 PE=4 SV=1	3	1	0.0123	57227.1	6.32
$886-2	tr|A0A0J9V987|A0A0J9V987_FUSO4 Uncharacterized protein OS=Fusarium oxysporum f. sp. lycopersici (strain 4287 / CBS 123668 / FGSC 9935 / NRRL 34936) OX=426428 GN=FOXG_08670 PE=4 SV=1	3	1	0.0113	61306.3	5.57
$887-1	tr|A0A0D2Y0R9|A0A0D2Y0R9_FUSO4 Uncharacterized protein OS=Fusarium oxysporum f. sp. lycopersici (strain 4287 / CBS 123668 / FGSC 9935 / NRRL 34936) OX=426428 GN=FOXG_09859 PE=4 SV=1	3	1	0.0119	54461.7	7.16
$888-1	tr|A0A0D2Y0S3|A0A0D2Y0S3_FUSO4 Uncharacterized protein OS=Fusarium oxysporum f. sp. lycopersici (strain 4287 / CBS 123668 / FGSC 9935 / NRRL 34936) OX=426428 GN=FOXG_09863 PE=3 SV=1	3	1	0.0279	34635.8	9.82
$889-1	tr|A0A0D2Y4V8|A0A0D2Y4V8_FUSO4 Minor allergen Alt a 7 OS=Fusarium oxysporum f. sp. lycopersici (strain 4287 / CBS 123668 / FGSC 9935 / NRRL 34936) OX=426428 GN=FOXG_11312 PE=3 SV=1	3	1	0.0833	21739.2	5.54
$890-1	tr|A0A0D2YH55|A0A0D2YH55_FUSO4 Transcription factor IWS1 OS=Fusarium oxysporum f. sp. lycopersici (strain 4287 / CBS 123668 / FGSC 9935 / NRRL 34936) OX=426428 GN=FOXG_15647 PE=4 SV=1	3	1	0.0164	48552.4	6.35
$891-1	tr|A0A0D2YJQ4|A0A0D2YJQ4_FUSO4 Casein kinase II subunit beta OS=Fusarium oxysporum f. sp. lycopersici (strain 4287 / CBS 123668 / FGSC 9935 / NRRL 34936) OX=426428 PE=3 SV=1	3	1	0.0189	40974	5.47
$892-1	tr|A0A0J9U8V6|A0A0J9U8V6_FUSO4 Arylsulfatase OS=Fusarium oxysporum f. sp. lycopersici (strain 4287 / CBS 123668 / FGSC 9935 / NRRL 34936) OX=426428 GN=FOXG_00989 PE=3 SV=1	3	1	0.0108	62849.3	5.03
$892-2	tr|A0A0J9UM35|A0A0J9UM35_FUSO4 Uncharacterized protein OS=Fusarium oxysporum f. sp. lycopersici (strain 4287 / CBS 123668 / FGSC 9935 / NRRL 34936) OX=426428 GN=FOXG_03244 PE=4 SV=1	3	1	0.0105	62683.3	6.23
$892-3	tr|A0A0D2XAS3|A0A0D2XAS3_FUSO4 Sulfatase domain-containing protein OS=Fusarium oxysporum f. sp. lycopersici (strain 4287 / CBS 123668 / FGSC 9935 / NRRL 34936) OX=426428 PE=4 SV=1	3	1	0.0137	49975.8	4.86
$892-4	tr|A0A0J9UJ50|A0A0J9UJ50_FUSO4 Uncharacterized protein OS=Fusarium oxysporum f. sp. lycopersici (strain 4287 / CBS 123668 / FGSC 9935 / NRRL 34936) OX=426428 GN=FOXG_03244 PE=4 SV=1	3	1	0.0102	64080	6.32
$892-5	tr|A0A0J9UID6|A0A0J9UID6_FUSO4 Uncharacterized protein OS=Fusarium oxysporum f. sp. lycopersici (strain 4287 / CBS 123668 / FGSC 9935 / NRRL 34936) OX=426428 GN=FOXG_03244 PE=4 SV=1	3	1	0.0097	67308.4	6.22
$892-6	tr|A0A0D2XH46|A0A0D2XH46_FUSO4 Uncharacterized protein OS=Fusarium oxysporum f. sp. lycopersici (strain 4287 / CBS 123668 / FGSC 9935 / NRRL 34936) OX=426428 PE=4 SV=1	3	1	0.0125	51730	6.32
$892-7	tr|A0A0J9UK02|A0A0J9UK02_FUSO4 Uncharacterized protein OS=Fusarium oxysporum f. sp. lycopersici (strain 4287 / CBS 123668 / FGSC 9935 / NRRL 34936) OX=426428 GN=FOXG_03244 PE=4 SV=1	3	1	0.0095	68705.1	6.3
$893-1	tr|A0A0J9U952|A0A0J9U952_FUSO4 Peptidylprolyl isomerase OS=Fusarium oxysporum f. sp. lycopersici (strain 4287 / CBS 123668 / FGSC 9935 / NRRL 34936) OX=426428 GN=FOXG_00576 PE=4 SV=1	3	1	0.0097	69592.9	6.72
$893-2	tr|A0A0J9WG93|A0A0J9WG93_FUSO4 Peptidylprolyl isomerase OS=Fusarium oxysporum f. sp. lycopersici (strain 4287 / CBS 123668 / FGSC 9935 / NRRL 34936) OX=426428 GN=FOXG_00576 PE=4 SV=1	3	1	0.0099	67889.4	7.32
$893-3	tr|A0A0D2X9L1|A0A0D2X9L1_FUSO4 Peptidylprolyl isomerase OS=Fusarium oxysporum f. sp. lycopersici (strain 4287 / CBS 123668 / FGSC 9935 / NRRL 34936) OX=426428 PE=4 SV=1	3	1	0.0101	66307.7	8.31
$894-1	tr|A0A0J9UER7|A0A0J9UER7_FUSO4 WSC domain-containing protein OS=Fusarium oxysporum f. sp. lycopersici (strain 4287 / CBS 123668 / FGSC 9935 / NRRL 34936) OX=426428 GN=FOXG_01716 PE=4 SV=1	3	1	0.0092	68029.9	4.55
$894-2	tr|A0A0D2XCU1|A0A0D2XCU1_FUSO4 Uncharacterized protein OS=Fusarium oxysporum f. sp. lycopersici (strain 4287 / CBS 123668 / FGSC 9935 / NRRL 34936) OX=426428 PE=4 SV=1	3	1	0.0294	21132.1	3.59
$895-1	tr|A0A0J9ULQ8|A0A0J9ULQ8_FUSO4 BHLH domain-containing protein OS=Fusarium oxysporum f. sp. lycopersici (strain 4287 / CBS 123668 / FGSC 9935 / NRRL 34936) OX=426428 GN=FOXG_18696 PE=4 SV=1	3	1	0.0194	34208.9	5.24
$896-1	tr|A0A0J9UVD9|A0A0J9UVD9_FUSO4 HDAC_interact domain-containing protein OS=Fusarium oxysporum f. sp. lycopersici (strain 4287 / CBS 123668 / FGSC 9935 / NRRL 34936) OX=426428 GN=FOXG_05922 PE=4 SV=1	3	1	0.0086	144122	6.15
$896-2	tr|A0A0J9UX30|A0A0J9UX30_FUSO4 HDAC_interact domain-containing protein OS=Fusarium oxysporum f. sp. lycopersici (strain 4287 / CBS 123668 / FGSC 9935 / NRRL 34936) OX=426428 GN=FOXG_05922 PE=4 SV=1	3	1	0.0076	163594	6
$896-3	tr|A0A0D2XPN4|A0A0D2XPN4_FUSO4 HDAC_interact domain-containing protein OS=Fusarium oxysporum f. sp. lycopersici (strain 4287 / CBS 123668 / FGSC 9935 / NRRL 34936) OX=426428 PE=4 SV=1	3	1	0.0086	145187	5.74
$896-4	tr|A0A0J9UXW1|A0A0J9UXW1_FUSO4 HDAC_interact domain-containing protein OS=Fusarium oxysporum f. sp. lycopersici (strain 4287 / CBS 123668 / FGSC 9935 / NRRL 34936) OX=426428 GN=FOXG_05922 PE=4 SV=1	3	1	0.0076	164140	6.03
$897-1	tr|A0A0J9UZY1|A0A0J9UZY1_FUSO4 Zn(2)-C6 fungal-type domain-containing protein OS=Fusarium oxysporum f. sp. lycopersici (strain 4287 / CBS 123668 / FGSC 9935 / NRRL 34936) OX=426428 GN=FOXG_06378 PE=4 SV=1	3	1	0.011	70286.8	7.66
$897-2	tr|A0A0C4DHT6|A0A0C4DHT6_FUSO4 Zn(II)2Cys6 transcription factor OS=Fusarium oxysporum f. sp. lycopersici (strain 4287 / CBS 123668 / FGSC 9935 / NRRL 34936) OX=426428 GN=FOXG_06378 PE=4 SV=1	3	1	0.0106	73214.2	7.67
$898-1	tr|A0A0J9V3N9|A0A0J9V3N9_FUSO4 HRDC domain-containing protein OS=Fusarium oxysporum f. sp. lycopersici (strain 4287 / CBS 123668 / FGSC 9935 / NRRL 34936) OX=426428 GN=FOXG_07755 PE=4 SV=1	3	1	0.0134	77096.5	5.69
$898-2	tr|A0A0J9V2D4|A0A0J9V2D4_FUSO4 HRDC domain-containing protein OS=Fusarium oxysporum f. sp. lycopersici (strain 4287 / CBS 123668 / FGSC 9935 / NRRL 34936) OX=426428 GN=FOXG_07755 PE=4 SV=1	3	1	0.0111	92486.9	5.78
$898-3	tr|A0A0J9WMG1|A0A0J9WMG1_FUSO4 HRDC domain-containing protein OS=Fusarium oxysporum f. sp. lycopersici (strain 4287 / CBS 123668 / FGSC 9935 / NRRL 34936) OX=426428 GN=FOXG_07755 PE=4 SV=1	3	1	0.0142	73090.7	8.84
$898-4	tr|A0A0D2XUU8|A0A0D2XUU8_FUSO4 HRDC domain-containing protein OS=Fusarium oxysporum f. sp. lycopersici (strain 4287 / CBS 123668 / FGSC 9935 / NRRL 34936) OX=426428 PE=4 SV=1	3	1	0.0113	91011.4	5.87
$899-1	tr|A0A0J9V8A8|A0A0J9V8A8_FUSO4 Uncharacterized protein OS=Fusarium oxysporum f. sp. lycopersici (strain 4287 / CBS 123668 / FGSC 9935 / NRRL 34936) OX=426428 GN=FOXG_19892 PE=4 SV=1	3	1	0.0641	17125	8.55
$900-1	tr|A0A0J9VCR8|A0A0J9VCR8_FUSO4 Uncharacterized protein OS=Fusarium oxysporum f. sp. lycopersici (strain 4287 / CBS 123668 / FGSC 9935 / NRRL 34936) OX=426428 GN=FOXG_20055 PE=4 SV=1	3	1	0.1296	5760.42	7.87
$901-1	tr|A0A0J9VGZ7|A0A0J9VGZ7_FUSO4 Uncharacterized protein OS=Fusarium oxysporum f. sp. lycopersici (strain 4287 / CBS 123668 / FGSC 9935 / NRRL 34936) OX=426428 GN=FOXG_10487 PE=4 SV=1	3	1	0.0037	179850	5.42
$901-2	tr|A0A0D2Y2J0|A0A0D2Y2J0_FUSO4 Uncharacterized protein OS=Fusarium oxysporum f. sp. lycopersici (strain 4287 / CBS 123668 / FGSC 9935 / NRRL 34936) OX=426428 GN=FOXG_10487 PE=4 SV=1	3	1	0.0033	198695	5.46
$902-1	tr|A0A0J9VKG7|A0A0J9VKG7_FUSO4 Uncharacterized protein OS=Fusarium oxysporum f. sp. lycopersici (strain 4287 / CBS 123668 / FGSC 9935 / NRRL 34936) OX=426428 GN=FOXG_11441 PE=4 SV=1	3	1	0.0139	47453.4	6.79
$902-2	tr|A0A0J9VK59|A0A0J9VK59_FUSO4 Uncharacterized protein OS=Fusarium oxysporum f. sp. lycopersici (strain 4287 / CBS 123668 / FGSC 9935 / NRRL 34936) OX=426428 GN=FOXG_11441 PE=4 SV=1	3	1	0.0163	40256.2	6.39
$903-1	tr|A0A0J9VVH7|A0A0J9VVH7_FUSO4 Fungal_trans domain-containing protein OS=Fusarium oxysporum f. sp. lycopersici (strain 4287 / CBS 123668 / FGSC 9935 / NRRL 34936) OX=426428 GN=FOXG_13717 PE=4 SV=1	3	1	0.0159	42142.3	5.34
$903-2	tr|A0A0D2YBN9|A0A0D2YBN9_FUSO4 Fungal_trans domain-containing protein OS=Fusarium oxysporum f. sp. lycopersici (strain 4287 / CBS 123668 / FGSC 9935 / NRRL 34936) OX=426428 PE=4 SV=1	3	1	0.0504	12882.7	6.72
$904-1	tr|A0A0J9VWW2|A0A0J9VWW2_FUSO4 Uncharacterized protein OS=Fusarium oxysporum f. sp. lycopersici (strain 4287 / CBS 123668 / FGSC 9935 / NRRL 34936) OX=426428 GN=FOXG_13861 PE=4 SV=1	3	1	0.0208	55600.3	5.62
$904-2	tr|A0A0D2YC30|A0A0D2YC30_FUSO4 Uncharacterized protein OS=Fusarium oxysporum f. sp. lycopersici (strain 4287 / CBS 123668 / FGSC 9935 / NRRL 34936) OX=426428 PE=4 SV=1	3	1	0.0236	48814.5	5.18
$905-1	tr|A0A0J9W9Z4|A0A0J9W9Z4_FUSO4 Uncharacterized protein OS=Fusarium oxysporum f. sp. lycopersici (strain 4287 / CBS 123668 / FGSC 9935 / NRRL 34936) OX=426428 GN=FOXG_22557 PE=4 SV=1	3	1	0.0899	9972.01	4.87
$906-1	sp|J9N5G7|THI4_FUSO4 Thiamine thiazole synthase OS=Fusarium oxysporum f. sp. lycopersici (strain 4287 / CBS 123668 / FGSC 9935 / NRRL 34936) OX=426428 GN=sti35 PE=3 SV=1	2	1	0.025	34578.7	5.9
$906-2	tr|A0A0J9VFF5|A0A0J9VFF5_FUSO4 Thiamine thiazole synthase OS=Fusarium oxysporum f. sp. lycopersici (strain 4287 / CBS 123668 / FGSC 9935 / NRRL 34936) OX=426428 GN=FOXG_10428 PE=3 SV=1	2	1	0.0214	40840.8	8.23
$906-3	tr|A0A0J9VGN5|A0A0J9VGN5_FUSO4 Thiamine thiazole synthase OS=Fusarium oxysporum f. sp. lycopersici (strain 4287 / CBS 123668 / FGSC 9935 / NRRL 34936) OX=426428 GN=FOXG_10428 PE=3 SV=1	2	1	0.025	34578.7	5.9
$907-1	tr|A0A0C4DHS2|A0A0C4DHS2_FUSO4 Alpha-galactosidase OS=Fusarium oxysporum f. sp. lycopersici (strain 4287 / CBS 123668 / FGSC 9935 / NRRL 34936) OX=426428 GN=FOXG_04398 PE=3 SV=1	2	1	0.0147	44780.2	8.01
$908-1	tr|A0A0C4DJE0|A0A0C4DJE0_FUSO4 Uncharacterized protein OS=Fusarium oxysporum f. sp. lycopersici (strain 4287 / CBS 123668 / FGSC 9935 / NRRL 34936) OX=426428 PE=4 SV=1	2	1	0.0197	38522.5	4.67
$908-2	tr|A0A0J9WB60|A0A0J9WB60_FUSO4 Protein arginine N-methyltransferase 1 OS=Fusarium oxysporum f. sp. lycopersici (strain 4287 / CBS 123668 / FGSC 9935 / NRRL 34936) OX=426428 GN=FOXG_17590 PE=4 SV=1	2	1	0.019	40992.1	4.7
$909-1	tr|A0A0D2X807|A0A0D2X807_FUSO4 EF-hand domain-containing protein OS=Fusarium oxysporum f. sp. lycopersici (strain 4287 / CBS 123668 / FGSC 9935 / NRRL 34936) OX=426428 PE=4 SV=1	2	1	0.0036	222910	8.31
$909-2	tr|A0A0J9U3L0|A0A0J9U3L0_FUSO4 EF-hand domain-containing protein OS=Fusarium oxysporum f. sp. lycopersici (strain 4287 / CBS 123668 / FGSC 9935 / NRRL 34936) OX=426428 GN=FOXG_00013 PE=3 SV=1	2	1	0.0037	217052	8.24
$909-3	tr|A0A0J9U322|A0A0J9U322_FUSO4 EF-hand domain-containing protein OS=Fusarium oxysporum f. sp. lycopersici (strain 4287 / CBS 123668 / FGSC 9935 / NRRL 34936) OX=426428 GN=FOXG_00013 PE=3 SV=1	2	1	0.0033	243621	8.37
$910-1	tr|A0A0D2X8B6|A0A0D2X8B6_FUSO4 40S ribosomal protein S28 OS=Fusarium oxysporum f. sp. lycopersici (strain 4287 / CBS 123668 / FGSC 9935 / NRRL 34936) OX=426428 GN=FOXG_00125 PE=3 SV=1	2	1	0.1324	7765.92	10.36
$911-1	tr|A0A0D2X965|A0A0D2X965_FUSO4 DNA polymerase lambda OS=Fusarium oxysporum f. sp. lycopersici (strain 4287 / CBS 123668 / FGSC 9935 / NRRL 34936) OX=426428 GN=FOXG_00425 PE=3 SV=1	2	1	0.0074	91787.6	9.04
$912-1	tr|A0A0D2X986|A0A0D2X986_FUSO4 Uncharacterized protein OS=Fusarium oxysporum f. sp. lycopersici (strain 4287 / CBS 123668 / FGSC 9935 / NRRL 34936) OX=426428 GN=FOXG_00446 PE=4 SV=1	2	1	0.0217	30748.5	10.03
$913-1	tr|A0A0D2X9W6|A0A0D2X9W6_FUSO4 Ubiquinone biosynthesis monooxygenase COQ6, mitochondrial OS=Fusarium oxysporum f. sp. lycopersici (strain 4287 / CBS 123668 / FGSC 9935 / NRRL 34936) OX=426428 GN=COQ6 PE=3 SV=1	2	1	0.0164	52965.4	6.43
$914-1	tr|A0A0D2XAN6|A0A0D2XAN6_FUSO4 Chromosome transmission fidelity protein 8 OS=Fusarium oxysporum f. sp. lycopersici (strain 4287 / CBS 123668 / FGSC 9935 / NRRL 34936) OX=426428 GN=FOXG_00952 PE=4 SV=1	2	1	0.0616	15797	8.93
$915-1	tr|A0A0D2XB23|A0A0D2XB23_FUSO4 Stress-induced-phosphoprotein 1 OS=Fusarium oxysporum f. sp. lycopersici (strain 4287 / CBS 123668 / FGSC 9935 / NRRL 34936) OX=426428 GN=FOXG_01090 PE=4 SV=1	2	1	0.0138	64350.5	5.5
$916-1	tr|A0A0D2XBI3|A0A0D2XBI3_FUSO4 Uncharacterized protein OS=Fusarium oxysporum f. sp. lycopersici (strain 4287 / CBS 123668 / FGSC 9935 / NRRL 34936) OX=426428 GN=FOXG_01253 PE=4 SV=1	2	1	0.0269	28158.5	4.34
$917-1	tr|A0A0D2XC15|A0A0D2XC15_FUSO4 Uncharacterized protein OS=Fusarium oxysporum f. sp. lycopersici (strain 4287 / CBS 123668 / FGSC 9935 / NRRL 34936) OX=426428 GN=FOXG_01438 PE=3 SV=1	2	1	0.0388	46100.1	6.09
$918-1	tr|A0A0D2XC57|A0A0D2XC57_FUSO4 Signal sequence receptor subunit alpha OS=Fusarium oxysporum f. sp. lycopersici (strain 4287 / CBS 123668 / FGSC 9935 / NRRL 34936) OX=426428 GN=FOXG_01480 PE=3 SV=1	2	1	0.083	28755.6	8.62
$919-1	tr|A0A0D2XD13|A0A0D2XD13_FUSO4 Uncharacterized protein OS=Fusarium oxysporum f. sp. lycopersici (strain 4287 / CBS 123668 / FGSC 9935 / NRRL 34936) OX=426428 GN=FOXG_01788 PE=4 SV=1	2	1	0.0198	56137.2	7.73
$920-1	tr|A0A0D2XD18|A0A0D2XD18_FUSO4 DUF4048 domain-containing protein OS=Fusarium oxysporum f. sp. lycopersici (strain 4287 / CBS 123668 / FGSC 9935 / NRRL 34936) OX=426428 PE=4 SV=1	2	1	0.0128	60319.1	9.6
$920-2	tr|A0A0J9UD42|A0A0J9UD42_FUSO4 DUF4048 domain-containing protein OS=Fusarium oxysporum f. sp. lycopersici (strain 4287 / CBS 123668 / FGSC 9935 / NRRL 34936) OX=426428 GN=FOXG_01793 PE=4 SV=1	2	1	0.0121	63806.6	10.47
$920-3	tr|A0A0J9WHG6|A0A0J9WHG6_FUSO4 DUF4048 domain-containing protein OS=Fusarium oxysporum f. sp. lycopersici (strain 4287 / CBS 123668 / FGSC 9935 / NRRL 34936) OX=426428 GN=FOXG_01793 PE=4 SV=1	2	1	0.0109	70991.5	10.12
$921-1	tr|A0A0D2XD32|A0A0D2XD32_FUSO4 Uncharacterized protein OS=Fusarium oxysporum f. sp. lycopersici (strain 4287 / CBS 123668 / FGSC 9935 / NRRL 34936) OX=426428 GN=FOXG_01807 PE=4 SV=1	2	1	0.0094	118936	5.66
$922-1	tr|A0A0D2XD88|A0A0D2XD88_FUSO4 Sister chromatid cohesion protein PDS5 OS=Fusarium oxysporum f. sp. lycopersici (strain 4287 / CBS 123668 / FGSC 9935 / NRRL 34936) OX=426428 GN=FOXG_01863 PE=4 SV=1	2	1	0.0081	165038	5.54
$923-1	tr|A0A0D2XDD2|A0A0D2XDD2_FUSO4 Uncharacterized protein OS=Fusarium oxysporum f. sp. lycopersici (strain 4287 / CBS 123668 / FGSC 9935 / NRRL 34936) OX=426428 PE=3 SV=1	2	1	0.0532	20866.4	6.65
$923-2	tr|A0A0J9UDQ7|A0A0J9UDQ7_FUSO4 Uncharacterized protein OS=Fusarium oxysporum f. sp. lycopersici (strain 4287 / CBS 123668 / FGSC 9935 / NRRL 34936) OX=426428 GN=FOXG_01911 PE=3 SV=1	2	1	0.0474	23249.4	6.96
$924-1	tr|A0A0D2XDK6|A0A0D2XDK6_FUSO4 tRNA wybutosine-synthesizing protein 4 OS=Fusarium oxysporum f. sp. lycopersici (strain 4287 / CBS 123668 / FGSC 9935 / NRRL 34936) OX=426428 GN=FOXG_01986 PE=4 SV=1	2	1	0.022	56479.7	4.96
$925-1	tr|A0A0D2XDN8|A0A0D2XDN8_FUSO4 Uncharacterized protein OS=Fusarium oxysporum f. sp. lycopersici (strain 4287 / CBS 123668 / FGSC 9935 / NRRL 34936) OX=426428 GN=FOXG_02018 PE=4 SV=1	2	1	0.0285	59716.1	5.57
$926-1	tr|A0A0D2XE39|A0A0D2XE39_FUSO4 DUF2040 domain-containing protein OS=Fusarium oxysporum f. sp. lycopersici (strain 4287 / CBS 123668 / FGSC 9935 / NRRL 34936) OX=426428 GN=FOXG_02170 PE=3 SV=1	2	1	0.025	45017.4	8.26
$927-1	tr|A0A0D2XE40|A0A0D2XE40_FUSO4 Uncharacterized protein OS=Fusarium oxysporum f. sp. lycopersici (strain 4287 / CBS 123668 / FGSC 9935 / NRRL 34936) OX=426428 PE=4 SV=1	2	1	0.0048	137810	5.14
$927-2	tr|A0A0J9UH77|A0A0J9UH77_FUSO4 Pre-mRNA-splicing factor RSE1 OS=Fusarium oxysporum f. sp. lycopersici (strain 4287 / CBS 123668 / FGSC 9935 / NRRL 34936) OX=426428 GN=FOXG_02171 PE=4 SV=1	2	1	0.0058	114783	4.83
$927-3	tr|A0A0J9UEG0|A0A0J9UEG0_FUSO4 Pre-mRNA-splicing factor RSE1 OS=Fusarium oxysporum f. sp. lycopersici (strain 4287 / CBS 123668 / FGSC 9935 / NRRL 34936) OX=426428 GN=FOXG_02171 PE=4 SV=1	2	1	0.005	133813	5.06
$928-1	tr|A0A0D2XEB4|A0A0D2XEB4_FUSO4 Phosphoinositide phospholipase C OS=Fusarium oxysporum f. sp. lycopersici (strain 4287 / CBS 123668 / FGSC 9935 / NRRL 34936) OX=426428 PE=4 SV=1	2	1	0.0143	70068	5.43
$928-2	tr|A0A0J9UFM4|A0A0J9UFM4_FUSO4 Phosphoinositide phospholipase C OS=Fusarium oxysporum f. sp. lycopersici (strain 4287 / CBS 123668 / FGSC 9935 / NRRL 34936) OX=426428 GN=FOXG_02246 PE=4 SV=1	2	1	0.0128	78184.9	6.15
$929-1	tr|A0A0D2XEE7|A0A0D2XEE7_FUSO4 WW domain-containing protein OS=Fusarium oxysporum f. sp. lycopersici (strain 4287 / CBS 123668 / FGSC 9935 / NRRL 34936) OX=426428 GN=FOXG_02279 PE=4 SV=1	2	1	0.0502	30289.5	4.83
$930-1	tr|A0A0D2XFN2|A0A0D2XFN2_FUSO4 Uncharacterized protein OS=Fusarium oxysporum f. sp. lycopersici (strain 4287 / CBS 123668 / FGSC 9935 / NRRL 34936) OX=426428 PE=4 SV=1	2	1	0.0444	14918.2	6.3
$930-2	tr|A0A0J9UJM1|A0A0J9UJM1_FUSO4 Uncharacterized protein OS=Fusarium oxysporum f. sp. lycopersici (strain 4287 / CBS 123668 / FGSC 9935 / NRRL 34936) OX=426428 GN=FOXG_18393 PE=4 SV=1	2	1	0.0038	176560	5.22
$931-1	tr|A0A0D2XFW0|A0A0D2XFW0_FUSO4 NmrA domain-containing protein OS=Fusarium oxysporum f. sp. lycopersici (strain 4287 / CBS 123668 / FGSC 9935 / NRRL 34936) OX=426428 GN=FOXG_02799 PE=4 SV=1	2	1	0.0221	35116.1	6.28
$932-1	tr|A0A0D2XH49|A0A0D2XH49_FUSO4 PH domain-containing protein OS=Fusarium oxysporum f. sp. lycopersici (strain 4287 / CBS 123668 / FGSC 9935 / NRRL 34936) OX=426428 GN=FOXG_03247 PE=4 SV=1	2	1	0.0245	52978.6	6.35
$933-1	tr|A0A0D2XHL4|A0A0D2XHL4_FUSO4 Uncharacterized protein OS=Fusarium oxysporum f. sp. lycopersici (strain 4287 / CBS 123668 / FGSC 9935 / NRRL 34936) OX=426428 GN=FOXG_03412 PE=4 SV=1	2	1	0.0086	129369	5.91
$934-1	tr|A0A0D2XHM4|A0A0D2XHM4_FUSO4 tRNA wybutosine-synthesizing protein 4 OS=Fusarium oxysporum f. sp. lycopersici (strain 4287 / CBS 123668 / FGSC 9935 / NRRL 34936) OX=426428 GN=FOXG_03422 PE=4 SV=1	2	1	0.0137	41942.3	5.66
$935-1	tr|A0A0D2XHW8|A0A0D2XHW8_FUSO4 MAGE domain-containing protein OS=Fusarium oxysporum f. sp. lycopersici (strain 4287 / CBS 123668 / FGSC 9935 / NRRL 34936) OX=426428 GN=FOXG_03517 PE=4 SV=1	2	1	0.026	35095.8	5.53
$936-1	tr|A0A0D2XI21|A0A0D2XI21_FUSO4 Cryptochrome DASH OS=Fusarium oxysporum f. sp. lycopersici (strain 4287 / CBS 123668 / FGSC 9935 / NRRL 34936) OX=426428 GN=FOXG_03570 PE=3 SV=1	2	1	0.0182	81711.9	6.83
$937-1	tr|A0A0D2XIJ8|A0A0D2XIJ8_FUSO4 Uncharacterized protein OS=Fusarium oxysporum f. sp. lycopersici (strain 4287 / CBS 123668 / FGSC 9935 / NRRL 34936) OX=426428 GN=FOXG_03753 PE=4 SV=1	2	1	0.0759	8943.25	9.84
$938-1	tr|A0A0D2XIR9|A0A0D2XIR9_FUSO4 DLH domain-containing protein OS=Fusarium oxysporum f. sp. lycopersici (strain 4287 / CBS 123668 / FGSC 9935 / NRRL 34936) OX=426428 GN=FOXG_03826 PE=4 SV=1	2	1	0.0319	27551.2	5.67
$939-1	tr|A0A0D2XIU7|A0A0D2XIU7_FUSO4 Uncharacterized protein OS=Fusarium oxysporum f. sp. lycopersici (strain 4287 / CBS 123668 / FGSC 9935 / NRRL 34936) OX=426428 GN=FOXG_03854 PE=4 SV=1	2	1	0.0071	93094.8	6.9
$939-2	tr|A0A0J9UQ28|A0A0J9UQ28_FUSO4 Uncharacterized protein OS=Fusarium oxysporum f. sp. lycopersici (strain 4287 / CBS 123668 / FGSC 9935 / NRRL 34936) OX=426428 GN=FOXG_03854 PE=4 SV=1	2	1	0.0074	89639.1	7.98
$940-1	tr|A0A0D2XJF2|A0A0D2XJF2_FUSO4 WD repeat-containing protein OS=Fusarium oxysporum f. sp. lycopersici (strain 4287 / CBS 123668 / FGSC 9935 / NRRL 34936) OX=426428 GN=FOXG_04062 PE=4 SV=1	2	1	0.0157	56538.9	7.83
$941-1	tr|A0A0D2XJH4|A0A0D2XJH4_FUSO4 Peptidase_M14 domain-containing protein OS=Fusarium oxysporum f. sp. lycopersici (strain 4287 / CBS 123668 / FGSC 9935 / NRRL 34936) OX=426428 GN=FOXG_04084 PE=3 SV=1	2	1	0.0225	48661.7	9.24
$942-1	tr|A0A0D2XK20|A0A0D2XK20_FUSO4 Uncharacterized protein OS=Fusarium oxysporum f. sp. lycopersici (strain 4287 / CBS 123668 / FGSC 9935 / NRRL 34936) OX=426428 GN=FOXG_04289 PE=4 SV=1	2	1	0.0039	229914	8.11
$943-1	tr|A0A0D2XK33|A0A0D2XK33_FUSO4 Aldehyde dehydrogenase (NAD+) OS=Fusarium oxysporum f. sp. lycopersici (strain 4287 / CBS 123668 / FGSC 9935 / NRRL 34936) OX=426428 GN=FOXG_04303 PE=3 SV=1	2	1	0.0141	53583.2	5.34
$944-1	tr|A0A0D2XK87|A0A0D2XK87_FUSO4 AAA domain-containing protein OS=Fusarium oxysporum f. sp. lycopersici (strain 4287 / CBS 123668 / FGSC 9935 / NRRL 34936) OX=426428 PE=3 SV=1	2	1	0.0359	33648	4.79
$945-1	tr|A0A0D2XKC2|A0A0D2XKC2_FUSO4 Dihydroxy-acid dehydratase, mitochondrial OS=Fusarium oxysporum f. sp. lycopersici (strain 4287 / CBS 123668 / FGSC 9935 / NRRL 34936) OX=426428 GN=FOXG_04395 PE=3 SV=1	2	1	0.0134	63649.3	7.01
$946-1	tr|A0A0D2XKH6|A0A0D2XKH6_FUSO4 DSBA domain-containing protein OS=Fusarium oxysporum f. sp. lycopersici (strain 4287 / CBS 123668 / FGSC 9935 / NRRL 34936) OX=426428 GN=FOXG_04450 PE=4 SV=1	2	1	0.0405	24906.6	5.66
$947-1	tr|A0A0D2XKY9|A0A0D2XKY9_FUSO4 Uncharacterized protein OS=Fusarium oxysporum f. sp. lycopersici (strain 4287 / CBS 123668 / FGSC 9935 / NRRL 34936) OX=426428 GN=FOXG_04613 PE=4 SV=1	2	1	0.0064	155913	4.72
$948-1	tr|A0A0D2XLN3|A0A0D2XLN3_FUSO4 Uncharacterized protein OS=Fusarium oxysporum f. sp. lycopersici (strain 4287 / CBS 123668 / FGSC 9935 / NRRL 34936) OX=426428 GN=FOXG_04857 PE=4 SV=1	2	1	0.0063	85650.1	8.05
$949-1	tr|A0A0D2XLR0|A0A0D2XLR0_FUSO4 CBM1 domain-containing protein OS=Fusarium oxysporum f. sp. lycopersici (strain 4287 / CBS 123668 / FGSC 9935 / NRRL 34936) OX=426428 GN=FOXG_04884 PE=4 SV=1	2	1	0.0151	43215.6	8.01
$950-1	tr|A0A0D2XMK3|A0A0D2XMK3_FUSO4 Uncharacterized protein OS=Fusarium oxysporum f. sp. lycopersici (strain 4287 / CBS 123668 / FGSC 9935 / NRRL 34936) OX=426428 GN=FOXG_05180 PE=3 SV=1	2	1	0.016	35719.3	9.8
$951-1	tr|A0A0D2XML8|A0A0D2XML8_FUSO4 CAP10 domain-containing protein OS=Fusarium oxysporum f. sp. lycopersici (strain 4287 / CBS 123668 / FGSC 9935 / NRRL 34936) OX=426428 PE=4 SV=1	2	1	0.0114	71532.4	7.29
$951-2	tr|A0A0J9WKK8|A0A0J9WKK8_FUSO4 CAP10 domain-containing protein OS=Fusarium oxysporum f. sp. lycopersici (strain 4287 / CBS 123668 / FGSC 9935 / NRRL 34936) OX=426428 GN=FOXG_05195 PE=4 SV=1	2	1	0.0114	71663.6	7.29
$952-1	tr|A0A0D2XMW1|A0A0D2XMW1_FUSO4 NEDD8-conjugating enzyme UBC12 OS=Fusarium oxysporum f. sp. lycopersici (strain 4287 / CBS 123668 / FGSC 9935 / NRRL 34936) OX=426428 GN=FOXG_05289 PE=3 SV=1	2	1	0.0378	21110	8.8
$953-1	tr|A0A0D2XNG6|A0A0D2XNG6_FUSO4 t-SNARE coiled-coil homology domain-containing protein OS=Fusarium oxysporum f. sp. lycopersici (strain 4287 / CBS 123668 / FGSC 9935 / NRRL 34936) OX=426428 GN=FOXG_05496 PE=4 SV=1	2	1	0.0282	35918.1	5.58
$954-1	tr|A0A0D2XNM6|A0A0D2XNM6_FUSO4 Uncharacterized protein OS=Fusarium oxysporum f. sp. lycopersici (strain 4287 / CBS 123668 / FGSC 9935 / NRRL 34936) OX=426428 GN=FOXG_05558 PE=3 SV=1	2	1	0.0365	36090.6	9.78
$954-2	tr|A0A0J9UVM2|A0A0J9UVM2_FUSO4 Uncharacterized protein OS=Fusarium oxysporum f. sp. lycopersici (strain 4287 / CBS 123668 / FGSC 9935 / NRRL 34936) OX=426428 GN=FOXG_05558 PE=3 SV=1	2	1	0.042	31537.2	9.51
$955-1	tr|A0A0D2XP40|A0A0D2XP40_FUSO4 NACHT domain-containing protein OS=Fusarium oxysporum f. sp. lycopersici (strain 4287 / CBS 123668 / FGSC 9935 / NRRL 34936) OX=426428 PE=4 SV=1	2	1	0.0114	110594	5.49
$955-2	tr|A0A0J9WL47|A0A0J9WL47_FUSO4 NACHT domain-containing protein OS=Fusarium oxysporum f. sp. lycopersici (strain 4287 / CBS 123668 / FGSC 9935 / NRRL 34936) OX=426428 GN=FOXG_05726 PE=4 SV=1	2	1	0.0112	112242	5.74
$956-1	tr|A0A0D2XP94|A0A0D2XP94_FUSO4 Uncharacterized protein OS=Fusarium oxysporum f. sp. lycopersici (strain 4287 / CBS 123668 / FGSC 9935 / NRRL 34936) OX=426428 GN=FOXG_05781 PE=4 SV=1	2	1	0.2	3331.8	10.45
$957-1	tr|A0A0D2XQR1|A0A0D2XQR1_FUSO4 Uncharacterized protein OS=Fusarium oxysporum f. sp. lycopersici (strain 4287 / CBS 123668 / FGSC 9935 / NRRL 34936) OX=426428 GN=FOXG_06309 PE=4 SV=1	2	1	0.0175	56176.6	8.63
$958-1	tr|A0A0D2XSM5|A0A0D2XSM5_FUSO4 Proteasome inhibitor PI31 subunit OS=Fusarium oxysporum f. sp. lycopersici (strain 4287 / CBS 123668 / FGSC 9935 / NRRL 34936) OX=426428 GN=FOXG_06977 PE=3 SV=1	2	1	0.0164	39562.2	4.92
$958-2	tr|A0A0D2Y742|A0A0D2Y742_FUSO4 Carboxylic ester hydrolase OS=Fusarium oxysporum f. sp. lycopersici (strain 4287 / CBS 123668 / FGSC 9935 / NRRL 34936) OX=426428 PE=3 SV=1	2	1	0.0111	58102.8	5.68
$959-1	tr|A0A0D2XU67|A0A0D2XU67_FUSO4 Mannitol-1-phosphate 5-dehydrogenase OS=Fusarium oxysporum f. sp. lycopersici (strain 4287 / CBS 123668 / FGSC 9935 / NRRL 34936) OX=426428 GN=FOXG_07519 PE=3 SV=1	2	1	0.0205	43629.6	5.01
$960-1	tr|A0A0D2XU95|A0A0D2XU95_FUSO4 Uncharacterized protein OS=Fusarium oxysporum f. sp. lycopersici (strain 4287 / CBS 123668 / FGSC 9935 / NRRL 34936) OX=426428 PE=4 SV=1	2	1	0.0232	29771.1	9.75
$961-1	tr|A0A0D2XV06|A0A0D2XV06_FUSO4 Serine/threonine-protein phosphatase OS=Fusarium oxysporum f. sp. lycopersici (strain 4287 / CBS 123668 / FGSC 9935 / NRRL 34936) OX=426428 PE=3 SV=1	2	1	0.0175	59099.6	5.56
$961-2	tr|A0A0J9V3Z8|A0A0J9V3Z8_FUSO4 Serine/threonine-protein phosphatase OS=Fusarium oxysporum f. sp. lycopersici (strain 4287 / CBS 123668 / FGSC 9935 / NRRL 34936) OX=426428 GN=FOXG_07814 PE=3 SV=1	2	1	0.0159	64945.9	5.52
$962-1	tr|A0A0D2XVA1|A0A0D2XVA1_FUSO4 Uncharacterized protein OS=Fusarium oxysporum f. sp. lycopersici (strain 4287 / CBS 123668 / FGSC 9935 / NRRL 34936) OX=426428 GN=FOXG_07909 PE=4 SV=1	2	1	0.0194	64816.3	9.64
$963-1	tr|A0A0D2XVT7|A0A0D2XVT7_FUSO4 Uncharacterized protein OS=Fusarium oxysporum f. sp. lycopersici (strain 4287 / CBS 123668 / FGSC 9935 / NRRL 34936) OX=426428 GN=FOXG_08099 PE=3 SV=1	2	1	0.0258	38763.7	6.4
$964-1	tr|A0A0D2XWY0|A0A0D2XWY0_FUSO4 Dolichyl-phosphate beta-glucosyltransferase OS=Fusarium oxysporum f. sp. lycopersici (strain 4287 / CBS 123668 / FGSC 9935 / NRRL 34936) OX=426428 GN=FOXG_08496 PE=3 SV=1	2	1	0.0292	45415.7	6.44
$965-1	tr|A0A0D2XX10|A0A0D2XX10_FUSO4 Lon protease homolog, mitochondrial OS=Fusarium oxysporum f. sp. lycopersici (strain 4287 / CBS 123668 / FGSC 9935 / NRRL 34936) OX=426428 GN=PIM1 PE=3 SV=1	2	1	0.0072	122668	5.64
$966-1	tr|A0A0D2XZC9|A0A0D2XZC9_FUSO4 Cell division cycle protein 123 OS=Fusarium oxysporum f. sp. lycopersici (strain 4287 / CBS 123668 / FGSC 9935 / NRRL 34936) OX=426428 GN=FOXG_09356 PE=3 SV=1	2	1	0.0311	47723.5	4.67
$967-1	tr|A0A0D2XZI9|A0A0D2XZI9_FUSO4 Hsp98-like protein OS=Fusarium oxysporum f. sp. lycopersici (strain 4287 / CBS 123668 / FGSC 9935 / NRRL 34936) OX=426428 GN=FOXG_09418 PE=3 SV=1	2	1	0.0119	103028	5.62
$968-1	tr|A0A0D2Y060|A0A0D2Y060_FUSO4 Formyl_trans_C domain-containing protein OS=Fusarium oxysporum f. sp. lycopersici (strain 4287 / CBS 123668 / FGSC 9935 / NRRL 34936) OX=426428 GN=FOXG_09648 PE=4 SV=1	2	1	0.0133	74370.2	8.97
$969-1	tr|A0A0D2Y0S7|A0A0D2Y0S7_FUSO4 CENP-V/GFA domain-containing protein OS=Fusarium oxysporum f. sp. lycopersici (strain 4287 / CBS 123668 / FGSC 9935 / NRRL 34936) OX=426428 GN=FOXG_09867 PE=3 SV=1	2	1	0.0511	19187.5	5.8
$970-1	tr|A0A0D2Y1C8|A0A0D2Y1C8_FUSO4 Uncharacterized protein OS=Fusarium oxysporum f. sp. lycopersici (strain 4287 / CBS 123668 / FGSC 9935 / NRRL 34936) OX=426428 GN=FOXG_10071 PE=3 SV=1	2	1	0.0196	32455	4.55
$971-1	tr|A0A0D2Y1M3|A0A0D2Y1M3_FUSO4 Methyltransf_25 domain-containing protein OS=Fusarium oxysporum f. sp. lycopersici (strain 4287 / CBS 123668 / FGSC 9935 / NRRL 34936) OX=426428 GN=FOXG_10166 PE=4 SV=1	2	1	0.0369	33781.1	6.93
$972-1	tr|A0A0D2Y1N1|A0A0D2Y1N1_FUSO4 Oxidored_FMN domain-containing protein OS=Fusarium oxysporum f. sp. lycopersici (strain 4287 / CBS 123668 / FGSC 9935 / NRRL 34936) OX=426428 GN=FOXG_10174 PE=4 SV=1	2	1	0.0198	44579.2	9.42
$973-1	tr|A0A0D2Y237|A0A0D2Y237_FUSO4 50S ribosomal protein L15 OS=Fusarium oxysporum f. sp. lycopersici (strain 4287 / CBS 123668 / FGSC 9935 / NRRL 34936) OX=426428 GN=FOXG_10331 PE=3 SV=1	2	1	0.0508	32177.5	10.03
$974-1	tr|A0A0D2Y2M9|A0A0D2Y2M9_FUSO4 Uncharacterized protein OS=Fusarium oxysporum f. sp. lycopersici (strain 4287 / CBS 123668 / FGSC 9935 / NRRL 34936) OX=426428 GN=FOXG_10528 PE=4 SV=1	2	1	0.0262	29329	9.86
$975-1	tr|A0A0D2Y2R5|A0A0D2Y2R5_FUSO4 Pre-mRNA-splicing factor spp42 OS=Fusarium oxysporum f. sp. lycopersici (strain 4287 / CBS 123668 / FGSC 9935 / NRRL 34936) OX=426428 GN=FOXG_10564 PE=4 SV=1	2	1	0.0034	274718	8.84
$976-1	tr|A0A0D2Y345|A0A0D2Y345_FUSO4 Uncharacterized protein OS=Fusarium oxysporum f. sp. lycopersici (strain 4287 / CBS 123668 / FGSC 9935 / NRRL 34936) OX=426428 PE=4 SV=1	2	1	0.0152	37192.1	6.61
$977-1	tr|A0A0D2Y4R8|A0A0D2Y4R8_FUSO4 IPT/TIG domain-containing protein OS=Fusarium oxysporum f. sp. lycopersici (strain 4287 / CBS 123668 / FGSC 9935 / NRRL 34936) OX=426428 GN=FOXG_11271 PE=4 SV=1	2	1	0.0043	153322	6.16
$977-2	tr|A0A0J9VJV4|A0A0J9VJV4_FUSO4 IPT/TIG domain-containing protein OS=Fusarium oxysporum f. sp. lycopersici (strain 4287 / CBS 123668 / FGSC 9935 / NRRL 34936) OX=426428 GN=FOXG_11271 PE=4 SV=1	2	1	0.0043	151190	6.11
$977-3	tr|A0A0J9VKI3|A0A0J9VKI3_FUSO4 IPT/TIG domain-containing protein OS=Fusarium oxysporum f. sp. lycopersici (strain 4287 / CBS 123668 / FGSC 9935 / NRRL 34936) OX=426428 GN=FOXG_11271 PE=4 SV=1	2	1	0.0043	153240	6.08
$978-1	tr|A0A0D2Y5F7|A0A0D2Y5F7_FUSO4 50S ribosomal protein L13 OS=Fusarium oxysporum f. sp. lycopersici (strain 4287 / CBS 123668 / FGSC 9935 / NRRL 34936) OX=426428 GN=FOXG_11512 PE=3 SV=1	2	1	0.0447	19866.8	10.2
$979-1	tr|A0A0D2Y605|A0A0D2Y605_FUSO4 DAO domain-containing protein OS=Fusarium oxysporum f. sp. lycopersici (strain 4287 / CBS 123668 / FGSC 9935 / NRRL 34936) OX=426428 GN=FOXG_11713 PE=3 SV=1	2	1	0.0113	58568.6	5.28
$980-1	tr|A0A0D2Y693|A0A0D2Y693_FUSO4 Uncharacterized protein OS=Fusarium oxysporum f. sp. lycopersici (strain 4287 / CBS 123668 / FGSC 9935 / NRRL 34936) OX=426428 GN=FOXG_11803 PE=4 SV=1	2	1	0.019	34430.9	4.89
$981-1	tr|A0A0D2Y6X0|A0A0D2Y6X0_FUSO4 Uncharacterized protein OS=Fusarium oxysporum f. sp. lycopersici (strain 4287 / CBS 123668 / FGSC 9935 / NRRL 34936) OX=426428 PE=4 SV=1	2	1	0.0204	33482.1	5.11
$981-2	tr|A0A0J9VP46|A0A0J9VP46_FUSO4 Uncharacterized protein OS=Fusarium oxysporum f. sp. lycopersici (strain 4287 / CBS 123668 / FGSC 9935 / NRRL 34936) OX=426428 GN=FOXG_12030 PE=4 SV=1	2	1	0.0189	36256.2	5.13
$982-1	tr|A0A0D2Y798|A0A0D2Y798_FUSO4 Uncharacterized protein OS=Fusarium oxysporum f. sp. lycopersici (strain 4287 / CBS 123668 / FGSC 9935 / NRRL 34936) OX=426428 GN=FOXG_12160 PE=4 SV=1	2	1	0.0179	38504.6	4.78
$983-1	tr|A0A0D2Y7U1|A0A0D2Y7U1_FUSO4 Amidase OS=Fusarium oxysporum f. sp. lycopersici (strain 4287 / CBS 123668 / FGSC 9935 / NRRL 34936) OX=426428 GN=FOXG_12357 PE=3 SV=1	2	1	0.013	60366.4	5.93
$984-1	tr|A0A0D2Y7Z9|A0A0D2Y7Z9_FUSO4 Uncharacterized protein OS=Fusarium oxysporum f. sp. lycopersici (strain 4287 / CBS 123668 / FGSC 9935 / NRRL 34936) OX=426428 PE=4 SV=1	2	1	0.0492	20494.7	10.25
$984-2	tr|A0A0J9WS44|A0A0J9WS44_FUSO4 C3H1-type domain-containing protein OS=Fusarium oxysporum f. sp. lycopersici (strain 4287 / CBS 123668 / FGSC 9935 / NRRL 34936) OX=426428 GN=FOXG_12415 PE=4 SV=1	2	1	0.0294	33654.3	9.25
$985-1	tr|A0A0D2Y897|A0A0D2Y897_FUSO4 SNF2_N domain-containing protein OS=Fusarium oxysporum f. sp. lycopersici (strain 4287 / CBS 123668 / FGSC 9935 / NRRL 34936) OX=426428 PE=4 SV=1	2	1	0.028	32869.4	9.88
$986-1	tr|A0A0D2Y8N0|A0A0D2Y8N0_FUSO4 26S proteasome regulatory subunit N6 OS=Fusarium oxysporum f. sp. lycopersici (strain 4287 / CBS 123668 / FGSC 9935 / NRRL 34936) OX=426428 GN=FOXG_12646 PE=4 SV=1	2	1	0.018	57381.5	6.03
$986-2	tr|A0A0J9WRQ5|A0A0J9WRQ5_FUSO4 26S proteasome regulatory subunit N6 OS=Fusarium oxysporum f. sp. lycopersici (strain 4287 / CBS 123668 / FGSC 9935 / NRRL 34936) OX=426428 GN=FOXG_12646 PE=4 SV=1	2	1	0.0171	60325.7	6.13
$987-1	tr|A0A0D2Y8T3|A0A0D2Y8T3_FUSO4 Endoribonuclease L-PSP OS=Fusarium oxysporum f. sp. lycopersici (strain 4287 / CBS 123668 / FGSC 9935 / NRRL 34936) OX=426428 GN=FOXG_12700 PE=3 SV=1	2	1	0.0534	14233.2	5.15
$988-1	tr|A0A0D2Y8X3|A0A0D2Y8X3_FUSO4 MFS domain-containing protein OS=Fusarium oxysporum f. sp. lycopersici (strain 4287 / CBS 123668 / FGSC 9935 / NRRL 34936) OX=426428 PE=4 SV=1	2	1	0.0124	54063	5.94
$988-2	tr|A0A0J9VR05|A0A0J9VR05_FUSO4 MFS domain-containing protein OS=Fusarium oxysporum f. sp. lycopersici (strain 4287 / CBS 123668 / FGSC 9935 / NRRL 34936) OX=426428 GN=FOXG_12741 PE=4 SV=1	2	1	0.0145	45529.5	5.99
$989-1	tr|A0A0D2Y8Z9|A0A0D2Y8Z9_FUSO4 Uncharacterized protein OS=Fusarium oxysporum f. sp. lycopersici (strain 4287 / CBS 123668 / FGSC 9935 / NRRL 34936) OX=426428 GN=FOXG_12767 PE=4 SV=1	2	1	0.039	17100.7	5.57
$990-1	tr|A0A0D2Y931|A0A0D2Y931_FUSO4 Uncharacterized protein OS=Fusarium oxysporum f. sp. lycopersici (strain 4287 / CBS 123668 / FGSC 9935 / NRRL 34936) OX=426428 GN=FOXG_12800 PE=3 SV=1	2	1	0.0113	69832.3	9.48
$991-1	tr|A0A0D2YAF4|A0A0D2YAF4_FUSO4 Uncharacterized protein OS=Fusarium oxysporum f. sp. lycopersici (strain 4287 / CBS 123668 / FGSC 9935 / NRRL 34936) OX=426428 GN=FOXG_13279 PE=3 SV=1	2	1	0.0323	27345.3	5.38
$992-1	tr|A0A0D2YB26|A0A0D2YB26_FUSO4 Uncharacterized protein OS=Fusarium oxysporum f. sp. lycopersici (strain 4287 / CBS 123668 / FGSC 9935 / NRRL 34936) OX=426428 PE=4 SV=1	2	1	0.0136	48221.9	6.36
$992-2	tr|A0A0J9VV99|A0A0J9VV99_FUSO4 Uncharacterized protein OS=Fusarium oxysporum f. sp. lycopersici (strain 4287 / CBS 123668 / FGSC 9935 / NRRL 34936) OX=426428 GN=FOXG_13504 PE=4 SV=1	2	1	0.0058	113901	6.51
$993-1	tr|A0A0D2YBQ8|A0A0D2YBQ8_FUSO4 Peptidyl-prolyl cis-trans isomerase OS=Fusarium oxysporum f. sp. lycopersici (strain 4287 / CBS 123668 / FGSC 9935 / NRRL 34936) OX=426428 GN=FOXG_13736 PE=3 SV=1	2	1	0.0124	55673.4	6.47
$994-1	tr|A0A0D2YBW5|A0A0D2YBW5_FUSO4 Pectinesterase OS=Fusarium oxysporum f. sp. lycopersici (strain 4287 / CBS 123668 / FGSC 9935 / NRRL 34936) OX=426428 GN=FOXG_13795 PE=3 SV=1	2	1	0.0086	122406	5.74
$995-1	tr|A0A0D2YDJ0|A0A0D2YDJ0_FUSO4 Uncharacterized protein OS=Fusarium oxysporum f. sp. lycopersici (strain 4287 / CBS 123668 / FGSC 9935 / NRRL 34936) OX=426428 PE=4 SV=1	2	1	0.0292	38330.6	6.12
$995-2	tr|A0A0J9W3Y8|A0A0J9W3Y8_FUSO4 Uncharacterized protein OS=Fusarium oxysporum f. sp. lycopersici (strain 4287 / CBS 123668 / FGSC 9935 / NRRL 34936) OX=426428 GN=FOXG_15107 PE=4 SV=1	2	1	0.0224	49757.8	9.16
$996-1	tr|A0A0D2YEE0|A0A0D2YEE0_FUSO4 Uncharacterized protein OS=Fusarium oxysporum f. sp. lycopersici (strain 4287 / CBS 123668 / FGSC 9935 / NRRL 34936) OX=426428 GN=FOXG_14677 PE=4 SV=1	2	1	0.0083	80522	5.07
$997-1	tr|A0A0D2YF47|A0A0D2YF47_FUSO4 NAD(P)-bd_dom domain-containing protein OS=Fusarium oxysporum f. sp. lycopersici (strain 4287 / CBS 123668 / FGSC 9935 / NRRL 34936) OX=426428 GN=FOXG_14935 PE=4 SV=1	2	1	0.0264	24939.3	5.44
$998-1	tr|A0A0D2YGQ9|A0A0D2YGQ9_FUSO4 FAD-binding FR-type domain-containing protein OS=Fusarium oxysporum f. sp. lycopersici (strain 4287 / CBS 123668 / FGSC 9935 / NRRL 34936) OX=426428 PE=4 SV=1	2	1	0.0295	29853	7.87
$998-2	tr|A0A0J9WUG2|A0A0J9WUG2_FUSO4 FAD-binding FR-type domain-containing protein OS=Fusarium oxysporum f. sp. lycopersici (strain 4287 / CBS 123668 / FGSC 9935 / NRRL 34936) OX=426428 GN=FOXG_15500 PE=4 SV=1	2	1	0.0153	57790	9.48
$999-1	tr|A0A0D2YHD4|A0A0D2YHD4_FUSO4 Uncharacterized protein OS=Fusarium oxysporum f. sp. lycopersici (strain 4287 / CBS 123668 / FGSC 9935 / NRRL 34936) OX=426428 GN=FOXG_15726 PE=4 SV=1	2	1	0.0367	30863.3	6.24
$1000-1	tr|A0A0D2YJ18|A0A0D2YJ18_FUSO4 Uncharacterized protein OS=Fusarium oxysporum f. sp. lycopersici (strain 4287 / CBS 123668 / FGSC 9935 / NRRL 34936) OX=426428 PE=3 SV=1	2	1	0.0104	62824	9.55
$1001-1	tr|A0A0D2YJ21|A0A0D2YJ21_FUSO4 Uncharacterized protein OS=Fusarium oxysporum f. sp. lycopersici (strain 4287 / CBS 123668 / FGSC 9935 / NRRL 34936) OX=426428 GN=FOXG_16535 PE=4 SV=1	2	1	0.0066	134442	5.52
$1002-1	tr|A0A0D2YJA8|A0A0D2YJA8_FUSO4 Uncharacterized protein OS=Fusarium oxysporum f. sp. lycopersici (strain 4287 / CBS 123668 / FGSC 9935 / NRRL 34936) OX=426428 GN=FOXG_16623 PE=4 SV=1	2	1	0.0368	19700.1	8.82
$1003-1	tr|A0A0J9U5U6|A0A0J9U5U6_FUSO4 Uncharacterized protein OS=Fusarium oxysporum f. sp. lycopersici (strain 4287 / CBS 123668 / FGSC 9935 / NRRL 34936) OX=426428 GN=FOXG_00413 PE=4 SV=1	2	1	0.0101	67986	8.86
$1004-1	tr|A0A0J9UAF1|A0A0J9UAF1_FUSO4 Uncharacterized protein OS=Fusarium oxysporum f. sp. lycopersici (strain 4287 / CBS 123668 / FGSC 9935 / NRRL 34936) OX=426428 GN=FOXG_18075 PE=4 SV=1	2	1	0.0146	54875.7	8.5
$1005-1	tr|A0A0J9UAH6|A0A0J9UAH6_FUSO4 Inosine-5'-monophosphate dehydrogenase OS=Fusarium oxysporum f. sp. lycopersici (strain 4287 / CBS 123668 / FGSC 9935 / NRRL 34936) OX=426428 GN=FOXG_00823 PE=3 SV=1	2	1	0.0235	49909.7	6.81
$1005-2	tr|A0A0D2XAA8|A0A0D2XAA8_FUSO4 Inosine-5'-monophosphate dehydrogenase OS=Fusarium oxysporum f. sp. lycopersici (strain 4287 / CBS 123668 / FGSC 9935 / NRRL 34936) OX=426428 GN=FOXG_00823 PE=3 SV=1	2	1	0.0207	56884.5	6.65
$1006-1	tr|A0A0J9UBT0|A0A0J9UBT0_FUSO4 Zn(2)-C6 fungal-type domain-containing protein OS=Fusarium oxysporum f. sp. lycopersici (strain 4287 / CBS 123668 / FGSC 9935 / NRRL 34936) OX=426428 GN=FOXG_18193 PE=4 SV=1	2	1	0.0152	65789.6	6.39
$1006-2	tr|A0A0D2XD45|A0A0D2XD45_FUSO4 Zn(2)-C6 fungal-type domain-containing protein OS=Fusarium oxysporum f. sp. lycopersici (strain 4287 / CBS 123668 / FGSC 9935 / NRRL 34936) OX=426428 PE=4 SV=1	2	1	0.0331	29680.8	7.6
$1007-1	tr|A0A0J9UC21|A0A0J9UC21_FUSO4 Uncharacterized protein OS=Fusarium oxysporum f. sp. lycopersici (strain 4287 / CBS 123668 / FGSC 9935 / NRRL 34936) OX=426428 GN=FOXG_01604 PE=3 SV=1	2	1	0.0186	41194.7	5.09
$1007-2	tr|A0A0D2XCI1|A0A0D2XCI1_FUSO4 Uncharacterized protein OS=Fusarium oxysporum f. sp. lycopersici (strain 4287 / CBS 123668 / FGSC 9935 / NRRL 34936) OX=426428 PE=3 SV=1	2	1	0.0207	37061	5.38
$1008-1	tr|A0A0J9UCD8|A0A0J9UCD8_FUSO4 Uncharacterized protein OS=Fusarium oxysporum f. sp. lycopersici (strain 4287 / CBS 123668 / FGSC 9935 / NRRL 34936) OX=426428 GN=FOXG_01773 PE=4 SV=1	2	1	0.0183	66996.9	5.73
$1009-1	tr|A0A0J9UEY8|A0A0J9UEY8_FUSO4 Uncharacterized protein OS=Fusarium oxysporum f. sp. lycopersici (strain 4287 / CBS 123668 / FGSC 9935 / NRRL 34936) OX=426428 GN=FOXG_01746 PE=4 SV=1	2	1	0.0204	48720.7	9.2
$1009-2	tr|A0A0D2XCX1|A0A0D2XCX1_FUSO4 Uncharacterized protein OS=Fusarium oxysporum f. sp. lycopersici (strain 4287 / CBS 123668 / FGSC 9935 / NRRL 34936) OX=426428 PE=4 SV=1	2	1	0.0257	38638.2	5.87
$1010-1	tr|A0A0J9UFW5|A0A0J9UFW5_FUSO4 Uncharacterized protein OS=Fusarium oxysporum f. sp. lycopersici (strain 4287 / CBS 123668 / FGSC 9935 / NRRL 34936) OX=426428 GN=FOXG_18271 PE=4 SV=1	2	1	0.175	4370	12.85
$1011-1	tr|A0A0J9UGI2|A0A0J9UGI2_FUSO4 bact-PGI_C domain-containing protein OS=Fusarium oxysporum f. sp. lycopersici (strain 4287 / CBS 123668 / FGSC 9935 / NRRL 34936) OX=426428 GN=FOXG_02869 PE=3 SV=1	2	1	0.0159	43953.9	6.4
$1011-2	tr|A0A0D2XG28|A0A0D2XG28_FUSO4 Uncharacterized protein OS=Fusarium oxysporum f. sp. lycopersici (strain 4287 / CBS 123668 / FGSC 9935 / NRRL 34936) OX=426428 PE=4 SV=1	2	1	0.0171	40854.4	6.4
$1012-1	tr|A0A0J9UHI7|A0A0J9UHI7_FUSO4 Uncharacterized protein OS=Fusarium oxysporum f. sp. lycopersici (strain 4287 / CBS 123668 / FGSC 9935 / NRRL 34936) OX=426428 GN=FOXG_02234 PE=4 SV=1	2	1	0.018	48670.5	6.37
$1012-2	tr|A0A0J9UFJ6|A0A0J9UFJ6_FUSO4 Uncharacterized protein OS=Fusarium oxysporum f. sp. lycopersici (strain 4287 / CBS 123668 / FGSC 9935 / NRRL 34936) OX=426428 GN=FOXG_02234 PE=4 SV=1	2	1	0.0189	46265.8	6.31
$1013-1	tr|A0A0J9UIC6|A0A0J9UIC6_FUSO4 Uncharacterized protein OS=Fusarium oxysporum f. sp. lycopersici (strain 4287 / CBS 123668 / FGSC 9935 / NRRL 34936) OX=426428 GN=FOXG_03114 PE=4 SV=1	2	1	0.0123	63676.4	9.55
$1013-2	tr|A0A0D2XGS0|A0A0D2XGS0_FUSO4 Uncharacterized protein OS=Fusarium oxysporum f. sp. lycopersici (strain 4287 / CBS 123668 / FGSC 9935 / NRRL 34936) OX=426428 PE=4 SV=1	2	1	0.0162	48020.8	9.84
$1013-3	tr|A0A0J9WIQ3|A0A0J9WIQ3_FUSO4 Uncharacterized protein OS=Fusarium oxysporum f. sp. lycopersici (strain 4287 / CBS 123668 / FGSC 9935 / NRRL 34936) OX=426428 GN=FOXG_03114 PE=4 SV=1	2	1	0.0127	61622.1	9.46
$1013-4	tr|A0A0J9UID0|A0A0J9UID0_FUSO4 Uncharacterized protein OS=Fusarium oxysporum f. sp. lycopersici (strain 4287 / CBS 123668 / FGSC 9935 / NRRL 34936) OX=426428 GN=FOXG_03114 PE=4 SV=1	2	1	0.0172	45337.8	9.62
$1013-5	tr|A0A0J9UL98|A0A0J9UL98_FUSO4 Uncharacterized protein OS=Fusarium oxysporum f. sp. lycopersici (strain 4287 / CBS 123668 / FGSC 9935 / NRRL 34936) OX=426428 GN=FOXG_03114 PE=4 SV=1	2	1	0.0125	62807.5	9.4
$1013-6	tr|A0A0J9UJ91|A0A0J9UJ91_FUSO4 Uncharacterized protein OS=Fusarium oxysporum f. sp. lycopersici (strain 4287 / CBS 123668 / FGSC 9935 / NRRL 34936) OX=426428 GN=FOXG_03114 PE=4 SV=1	2	1	0.0129	60753.1	9.29
$1014-1	tr|A0A0J9UIU7|A0A0J9UIU7_FUSO4 Uncharacterized protein OS=Fusarium oxysporum f. sp. lycopersici (strain 4287 / CBS 123668 / FGSC 9935 / NRRL 34936) OX=426428 GN=FOXG_03326 PE=4 SV=1	2	1	0.0195	41035.4	8.61
$1015-1	tr|A0A0J9UKU1|A0A0J9UKU1_FUSO4 Uncharacterized protein OS=Fusarium oxysporum f. sp. lycopersici (strain 4287 / CBS 123668 / FGSC 9935 / NRRL 34936) OX=426428 GN=FOXG_03735 PE=4 SV=1	2	1	0.003	229133	8.72
$1016-1	tr|A0A0J9UL78|A0A0J9UL78_FUSO4 Uncharacterized protein OS=Fusarium oxysporum f. sp. lycopersici (strain 4287 / CBS 123668 / FGSC 9935 / NRRL 34936) OX=426428 GN=FOXG_03808 PE=4 SV=1	2	1	0.0263	23291.6	4.71
$1016-2	tr|A0A0D2XIQ1|A0A0D2XIQ1_FUSO4 Uncharacterized protein OS=Fusarium oxysporum f. sp. lycopersici (strain 4287 / CBS 123668 / FGSC 9935 / NRRL 34936) OX=426428 PE=4 SV=1	2	1	0.0324	18877.2	4.84
$1017-1	tr|A0A0J9UQL8|A0A0J9UQL8_FUSO4 Oxidored_FMN domain-containing protein OS=Fusarium oxysporum f. sp. lycopersici (strain 4287 / CBS 123668 / FGSC 9935 / NRRL 34936) OX=426428 GN=FOXG_04951 PE=4 SV=1	2	1	0.0196	44244.5	8.35
$1018-1	tr|A0A0J9UR79|A0A0J9UR79_FUSO4 Fungal_trans domain-containing protein OS=Fusarium oxysporum f. sp. lycopersici (strain 4287 / CBS 123668 / FGSC 9935 / NRRL 34936) OX=426428 GN=FOXG_04712 PE=4 SV=1	2	1	0.0107	74006	5.41
$1018-2	tr|A0A0J9WK63|A0A0J9WK63_FUSO4 Zn(2)-C6 fungal-type domain-containing protein OS=Fusarium oxysporum f. sp. lycopersici (strain 4287 / CBS 123668 / FGSC 9935 / NRRL 34936) OX=426428 GN=FOXG_04712 PE=4 SV=1	2	1	0.0096	82501.6	6.04
$1019-1	tr|A0A0J9USY2|A0A0J9USY2_FUSO4 Ubiquinol-cytochrome c reductase subunit 8 OS=Fusarium oxysporum f. sp. lycopersici (strain 4287 / CBS 123668 / FGSC 9935 / NRRL 34936) OX=426428 GN=FOXG_05099 PE=3 SV=1	2	1	0.0648	12310.6	6.11
$1019-2	tr|A0A0D2XMC2|A0A0D2XMC2_FUSO4 Ubiquinol-cytochrome c reductase subunit 8 OS=Fusarium oxysporum f. sp. lycopersici (strain 4287 / CBS 123668 / FGSC 9935 / NRRL 34936) OX=426428 GN=FOXG_05099 PE=3 SV=1	2	1	0.0673	11904.2	9.05
$1020-1	tr|A0A0J9UT08|A0A0J9UT08_FUSO4 F-box domain-containing protein OS=Fusarium oxysporum f. sp. lycopersici (strain 4287 / CBS 123668 / FGSC 9935 / NRRL 34936) OX=426428 GN=FOXG_18879 PE=4 SV=1	2	1	0.0696	13717	9.67
$1021-1	tr|A0A0J9UTC1|A0A0J9UTC1_FUSO4 Uncharacterized protein OS=Fusarium oxysporum f. sp. lycopersici (strain 4287 / CBS 123668 / FGSC 9935 / NRRL 34936) OX=426428 GN=FOXG_05358 PE=4 SV=1	2	1	0.0242	41882	6.31
$1021-2	tr|A0A0D2XN29|A0A0D2XN29_FUSO4 Uncharacterized protein OS=Fusarium oxysporum f. sp. lycopersici (strain 4287 / CBS 123668 / FGSC 9935 / NRRL 34936) OX=426428 GN=FOXG_05358 PE=4 SV=1	2	1	0.0207	49208.2	7.07
$1021-3	tr|A0A0J9UUE5|A0A0J9UUE5_FUSO4 Uncharacterized protein OS=Fusarium oxysporum f. sp. lycopersici (strain 4287 / CBS 123668 / FGSC 9935 / NRRL 34936) OX=426428 GN=FOXG_05358 PE=4 SV=1	2	1	0.0194	52496.1	7.58
$1022-1	tr|A0A0J9UU69|A0A0J9UU69_FUSO4 Uncharacterized protein OS=Fusarium oxysporum f. sp. lycopersici (strain 4287 / CBS 123668 / FGSC 9935 / NRRL 34936) OX=426428 GN=FOXG_19036 PE=4 SV=1	2	1	0.0022	444081	4.37
$1022-2	tr|A0A0D2XMZ4|A0A0D2XMZ4_FUSO4 Uncharacterized protein OS=Fusarium oxysporum f. sp. lycopersici (strain 4287 / CBS 123668 / FGSC 9935 / NRRL 34936) OX=426428 PE=4 SV=1	2	1	0.0166	63845.5	10.36
$1022-3	tr|A0A0J9UVD7|A0A0J9UVD7_FUSO4 Uncharacterized protein OS=Fusarium oxysporum f. sp. lycopersici (strain 4287 / CBS 123668 / FGSC 9935 / NRRL 34936) OX=426428 GN=FOXG_19036 PE=4 SV=1	2	1	0.0022	442301	4.37
$1023-1	tr|A0A0J9UV80|A0A0J9UV80_FUSO4 Uncharacterized protein OS=Fusarium oxysporum f. sp. lycopersici (strain 4287 / CBS 123668 / FGSC 9935 / NRRL 34936) OX=426428 GN=FOXG_05271 PE=4 SV=1	2	1	0.0049	114971	9.9
$1023-2	tr|A0A0J9V9Z3|A0A0J9V9Z3_FUSO4 Uncharacterized protein OS=Fusarium oxysporum f. sp. lycopersici (strain 4287 / CBS 123668 / FGSC 9935 / NRRL 34936) OX=426428 GN=FOXG_08837 PE=4 SV=1	2	1	0.0064	87585.8	5.45
$1023-3	tr|A0A0D2XMU4|A0A0D2XMU4_FUSO4 Uncharacterized protein OS=Fusarium oxysporum f. sp. lycopersici (strain 4287 / CBS 123668 / FGSC 9935 / NRRL 34936) OX=426428 PE=4 SV=1	2	1	0.0049	113720	9.9
$1024-1	tr|A0A0J9V433|A0A0J9V433_FUSO4 GH16 domain-containing protein OS=Fusarium oxysporum f. sp. lycopersici (strain 4287 / CBS 123668 / FGSC 9935 / NRRL 34936) OX=426428 GN=FOXG_07831 PE=4 SV=1	2	1	0.0429	44211.3	6.42
$1024-2	tr|A0A0J9V237|A0A0J9V237_FUSO4 GH16 domain-containing protein OS=Fusarium oxysporum f. sp. lycopersici (strain 4287 / CBS 123668 / FGSC 9935 / NRRL 34936) OX=426428 GN=FOXG_07831 PE=4 SV=1	2	1	0.0478	39848.6	6.83
$1024-3	tr|A0A0D2XV23|A0A0D2XV23_FUSO4 GH16 domain-containing protein OS=Fusarium oxysporum f. sp. lycopersici (strain 4287 / CBS 123668 / FGSC 9935 / NRRL 34936) OX=426428 GN=FOXG_07831 PE=4 SV=1	2	1	0.045	42258	6.07
$1024-4	tr|A0A0J9V393|A0A0J9V393_FUSO4 GH16 domain-containing protein OS=Fusarium oxysporum f. sp. lycopersici (strain 4287 / CBS 123668 / FGSC 9935 / NRRL 34936) OX=426428 GN=FOXG_07831 PE=4 SV=1	2	1	0.0455	41801.9	7.58
$1025-1	tr|A0A0J9V695|A0A0J9V695_FUSO4 Uncharacterized protein OS=Fusarium oxysporum f. sp. lycopersici (strain 4287 / CBS 123668 / FGSC 9935 / NRRL 34936) OX=426428 GN=FOXG_08368 PE=4 SV=1	2	1	0.0162	63289.3	5.1
$1025-2	tr|A0A0D2XWK2|A0A0D2XWK2_FUSO4 Uncharacterized protein OS=Fusarium oxysporum f. sp. lycopersici (strain 4287 / CBS 123668 / FGSC 9935 / NRRL 34936) OX=426428 PE=4 SV=1	2	1	0.021	48843.3	5.06
$1026-1	tr|A0A0J9V6U2|A0A0J9V6U2_FUSO4 DNA-directed RNA polymerase subunit OS=Fusarium oxysporum f. sp. lycopersici (strain 4287 / CBS 123668 / FGSC 9935 / NRRL 34936) OX=426428 GN=FOXG_19785 PE=3 SV=1	2	1	0.082	13366.8	6.05
$1027-1	tr|A0A0J9V726|A0A0J9V726_FUSO4 Uncharacterized protein OS=Fusarium oxysporum f. sp. lycopersici (strain 4287 / CBS 123668 / FGSC 9935 / NRRL 34936) OX=426428 GN=FOXG_06495 PE=4 SV=1	2	1	0.014	56198.2	8.44
$1027-2	tr|A0A0C4BL17|A0A0C4BL17_FUSO4 Uncharacterized protein OS=Fusarium oxysporum f. sp. lycopersici (strain 4287 / CBS 123668 / FGSC 9935 / NRRL 34936) OX=426428 PE=4 SV=1	2	1	0.014	56454.5	8.58
$1028-1	tr|A0A0J9VA96|A0A0J9VA96_FUSO4 ABC transporter domain-containing protein OS=Fusarium oxysporum f. sp. lycopersici (strain 4287 / CBS 123668 / FGSC 9935 / NRRL 34936) OX=426428 GN=FOXG_09300 PE=4 SV=1	2	1	0.0111	70054	6.44
$1028-2	tr|A0A0D2XZ76|A0A0D2XZ76_FUSO4 ABC transporter domain-containing protein OS=Fusarium oxysporum f. sp. lycopersici (strain 4287 / CBS 123668 / FGSC 9935 / NRRL 34936) OX=426428 PE=4 SV=1	2	1	0.013	59910.5	5.55
$1029-1	tr|A0A0J9VBW6|A0A0J9VBW6_FUSO4 Uncharacterized protein OS=Fusarium oxysporum f. sp. lycopersici (strain 4287 / CBS 123668 / FGSC 9935 / NRRL 34936) OX=426428 GN=FOXG_09397 PE=4 SV=1	2	1	0.0296	31240.2	6.4
$1030-1	tr|A0A0J9VDA9|A0A0J9VDA9_FUSO4 Beta-glucosidase OS=Fusarium oxysporum f. sp. lycopersici (strain 4287 / CBS 123668 / FGSC 9935 / NRRL 34936) OX=426428 GN=FOXG_09624 PE=3 SV=1	2	1	0.0084	91074.9	5.46
$1030-2	tr|A0A0D2Y037|A0A0D2Y037_FUSO4 Beta-glucosidase OS=Fusarium oxysporum f. sp. lycopersici (strain 4287 / CBS 123668 / FGSC 9935 / NRRL 34936) OX=426428 PE=3 SV=1	2	1	0.0085	89917.5	5.38
$1031-1	tr|A0A0J9VJ22|A0A0J9VJ22_FUSO4 IQ domain-containing protein containing GTPase activating protein OS=Fusarium oxysporum f. sp. lycopersici (strain 4287 / CBS 123668 / FGSC 9935 / NRRL 34936) OX=426428 GN=FOXG_11214 PE=4 SV=1	2	1	0.003	192710	8.67
$1031-2	tr|A0A0J9VE71|A0A0J9VE71_FUSO4 AAT family amino acid transporter OS=Fusarium oxysporum f. sp. lycopersici (strain 4287 / CBS 123668 / FGSC 9935 / NRRL 34936) OX=426428 GN=FOXG_09951 PE=4 SV=1	2	1	0.0093	58580.7	7.59
$1031-3	tr|A0A0D2Y111|A0A0D2Y111_FUSO4 AA_permease domain-containing protein OS=Fusarium oxysporum f. sp. lycopersici (strain 4287 / CBS 123668 / FGSC 9935 / NRRL 34936) OX=426428 PE=4 SV=1	2	1	0.0091	60270.6	8.35
$1031-4	tr|A0A0D2Y4L1|A0A0D2Y4L1_FUSO4 IQ domain-containing protein containing GTPase activating protein OS=Fusarium oxysporum f. sp. lycopersici (strain 4287 / CBS 123668 / FGSC 9935 / NRRL 34936) OX=426428 GN=FOXG_11214 PE=4 SV=1	2	1	0.0028	202502	8.78
$1032-1	tr|A0A0J9VJR7|A0A0J9VJR7_FUSO4 RRM domain-containing protein OS=Fusarium oxysporum f. sp. lycopersici (strain 4287 / CBS 123668 / FGSC 9935 / NRRL 34936) OX=426428 GN=FOXG_11251 PE=3 SV=1	2	1	0.0166	69616.4	9.84
$1033-1	tr|A0A0J9VLS3|A0A0J9VLS3_FUSO4 Uncharacterized protein OS=Fusarium oxysporum f. sp. lycopersici (strain 4287 / CBS 123668 / FGSC 9935 / NRRL 34936) OX=426428 GN=FOXG_20605 PE=4 SV=1	2	1	0.3529	3342.76	7.98
$1034-1	tr|A0A0J9VNM5|A0A0J9VNM5_FUSO4 Uncharacterized protein OS=Fusarium oxysporum f. sp. lycopersici (strain 4287 / CBS 123668 / FGSC 9935 / NRRL 34936) OX=426428 GN=FOXG_20660 PE=4 SV=1	2	1	0.0255	44333.9	9.56
$1035-1	tr|A0A0J9VQM3|A0A0J9VQM3_FUSO4 Uncharacterized protein OS=Fusarium oxysporum f. sp. lycopersici (strain 4287 / CBS 123668 / FGSC 9935 / NRRL 34936) OX=426428 GN=FOXG_12675 PE=4 SV=1	2	1	0.0075	129355	4.86
$1035-2	tr|A0A0D2Y8Q9|A0A0D2Y8Q9_FUSO4 Uncharacterized protein OS=Fusarium oxysporum f. sp. lycopersici (strain 4287 / CBS 123668 / FGSC 9935 / NRRL 34936) OX=426428 PE=4 SV=1	2	1	0.0095	102515	4.49
$1036-1	tr|A0A0J9VRF4|A0A0J9VRF4_FUSO4 Uncharacterized protein OS=Fusarium oxysporum f. sp. lycopersici (strain 4287 / CBS 123668 / FGSC 9935 / NRRL 34936) OX=426428 GN=FOXG_12904 PE=4 SV=1	2	1	0.0131	93532.2	6.66
$1037-1	tr|A0A0J9VS99|A0A0J9VS99_FUSO4 Uncharacterized protein OS=Fusarium oxysporum f. sp. lycopersici (strain 4287 / CBS 123668 / FGSC 9935 / NRRL 34936) OX=426428 GN=FOXG_20896 PE=4 SV=1	2	1	0.0304	30309.8	9.97
$1038-1	tr|A0A0J9VT08|A0A0J9VT08_FUSO4 Uncharacterized protein OS=Fusarium oxysporum f. sp. lycopersici (strain 4287 / CBS 123668 / FGSC 9935 / NRRL 34936) OX=426428 GN=FOXG_20967 PE=4 SV=1	2	1	0.0251	23100.6	8.72
$1039-1	tr|A0A0J9VTQ6|A0A0J9VTQ6_FUSO4 Uncharacterized protein OS=Fusarium oxysporum f. sp. lycopersici (strain 4287 / CBS 123668 / FGSC 9935 / NRRL 34936) OX=426428 GN=FOXG_21114 PE=4 SV=1	2	1	0.1176	9539.03	8.94
$1040-1	tr|A0A0J9VTW8|A0A0J9VTW8_FUSO4 MFS domain-containing protein OS=Fusarium oxysporum f. sp. lycopersici (strain 4287 / CBS 123668 / FGSC 9935 / NRRL 34936) OX=426428 GN=FOXG_13299 PE=3 SV=1	2	1	0.0168	59682.2	7.13
$1040-2	tr|A0A0D2YAH4|A0A0D2YAH4_FUSO4 MFS domain-containing protein OS=Fusarium oxysporum f. sp. lycopersici (strain 4287 / CBS 123668 / FGSC 9935 / NRRL 34936) OX=426428 PE=3 SV=1	2	1	0.0172	58024.2	7.13
$1041-1	tr|A0A0J9VVM4|A0A0J9VVM4_FUSO4 Pyr_redox_2 domain-containing protein OS=Fusarium oxysporum f. sp. lycopersici (strain 4287 / CBS 123668 / FGSC 9935 / NRRL 34936) OX=426428 GN=FOXG_13456 PE=4 SV=1	2	1	0.0145	45415.4	8.57
$1041-2	tr|A0A0D2YAX8|A0A0D2YAX8_FUSO4 Pyr_redox_2 domain-containing protein OS=Fusarium oxysporum f. sp. lycopersici (strain 4287 / CBS 123668 / FGSC 9935 / NRRL 34936) OX=426428 GN=FOXG_13456 PE=4 SV=1	2	1	0.0157	41672.2	8.62
$1041-3	tr|A0A0J9W683|A0A0J9W683_FUSO4 CBM1 domain-containing protein OS=Fusarium oxysporum f. sp. lycopersici (strain 4287 / CBS 123668 / FGSC 9935 / NRRL 34936) OX=426428 GN=FOXG_15839 PE=3 SV=1	2	1	0.0069	93432.7	5.29
$1041-4	tr|A0A0D2YHP3|A0A0D2YHP3_FUSO4 CBM1 domain-containing protein OS=Fusarium oxysporum f. sp. lycopersici (strain 4287 / CBS 123668 / FGSC 9935 / NRRL 34936) OX=426428 PE=3 SV=1	2	1	0.0076	85096.1	5.06
$1042-1	tr|A0A0J9VW45|A0A0J9VW45_FUSO4 Superoxide dismutase OS=Fusarium oxysporum f. sp. lycopersici (strain 4287 / CBS 123668 / FGSC 9935 / NRRL 34936) OX=426428 GN=FOXG_13757 PE=3 SV=1	2	1	0.0304	25136.9	7.96
$1043-1	tr|A0A0J9VWE8|A0A0J9VWE8_FUSO4 Pyr_redox_2 domain-containing protein OS=Fusarium oxysporum f. sp. lycopersici (strain 4287 / CBS 123668 / FGSC 9935 / NRRL 34936) OX=426428 GN=FOXG_13903 PE=4 SV=1	2	1	0.029	52507.3	8.97
$1043-2	tr|A0A0D2YC72|A0A0D2YC72_FUSO4 Pyr_redox_2 domain-containing protein OS=Fusarium oxysporum f. sp. lycopersici (strain 4287 / CBS 123668 / FGSC 9935 / NRRL 34936) OX=426428 GN=FOXG_13903 PE=4 SV=1	2	1	0.0283	54003	8.9
$1044-1	tr|A0A0J9VWN7|A0A0J9VWN7_FUSO4 Uncharacterized protein OS=Fusarium oxysporum f. sp. lycopersici (strain 4287 / CBS 123668 / FGSC 9935 / NRRL 34936) OX=426428 GN=FOXG_21273 PE=4 SV=1	2	1	0.1385	7236.21	10.37
$1044-2	tr|A0A0J9VW62|A0A0J9VW62_FUSO4 4F5 domain-containing protein OS=Fusarium oxysporum f. sp. lycopersici (strain 4287 / CBS 123668 / FGSC 9935 / NRRL 34936) OX=426428 GN=FOXG_21273 PE=4 SV=1	2	1	0.1607	6433.27	10.23
$1045-1	tr|A0A0J9VYF2|A0A0J9VYF2_FUSO4 Pyruvate decarboxylase OS=Fusarium oxysporum f. sp. lycopersici (strain 4287 / CBS 123668 / FGSC 9935 / NRRL 34936) OX=426428 GN=FOXG_14498 PE=3 SV=1	2	1	0.0151	44486.3	9.01
$1045-2	tr|A0A0D2YDW3|A0A0D2YDW3_FUSO4 Pyruvate decarboxylase OS=Fusarium oxysporum f. sp. lycopersici (strain 4287 / CBS 123668 / FGSC 9935 / NRRL 34936) OX=426428 PE=3 SV=1	2	1	0.015	44599.4	9.01
$1046-1	tr|A0A0J9W0G6|A0A0J9W0G6_FUSO4 Uncharacterized protein OS=Fusarium oxysporum f. sp. lycopersici (strain 4287 / CBS 123668 / FGSC 9935 / NRRL 34936) OX=426428 GN=FOXG_21607 PE=4 SV=1	2	1	0.069	9750.86	5.59
$1047-1	tr|A0A0J9W1M9|A0A0J9W1M9_FUSO4 Uncharacterized protein OS=Fusarium oxysporum f. sp. lycopersici (strain 4287 / CBS 123668 / FGSC 9935 / NRRL 34936) OX=426428 GN=FOXG_21859 PE=4 SV=1	2	1	0.1746	6847.49	6.01
$1048-1	tr|A0A0J9W2Q5|A0A0J9W2Q5_FUSO4 Uncharacterized protein OS=Fusarium oxysporum f. sp. lycopersici (strain 4287 / CBS 123668 / FGSC 9935 / NRRL 34936) OX=426428 GN=FOXG_15271 PE=4 SV=1	2	1	0.0133	59179.6	9.25
$1048-2	tr|A0A0D2YG33|A0A0D2YG33_FUSO4 Uncharacterized protein OS=Fusarium oxysporum f. sp. lycopersici (strain 4287 / CBS 123668 / FGSC 9935 / NRRL 34936) OX=426428 PE=4 SV=1	2	1	0.0151	52433.4	9.59
$1049-1	tr|A0A0J9W6D5|A0A0J9W6D5_FUSO4 Uncharacterized protein OS=Fusarium oxysporum f. sp. lycopersici (strain 4287 / CBS 123668 / FGSC 9935 / NRRL 34936) OX=426428 GN=FOXG_15873 PE=4 SV=1	2	1	0.0091	149869	7.32
$1049-2	tr|A0A0D2YHS7|A0A0D2YHS7_FUSO4 Uncharacterized protein OS=Fusarium oxysporum f. sp. lycopersici (strain 4287 / CBS 123668 / FGSC 9935 / NRRL 34936) OX=426428 PE=4 SV=1	2	1	0.0097	139949	6.94
$1050-1	tr|A0A0J9WAN9|A0A0J9WAN9_FUSO4 SET domain-containing protein OS=Fusarium oxysporum f. sp. lycopersici (strain 4287 / CBS 123668 / FGSC 9935 / NRRL 34936) OX=426428 GN=FOXG_17490 PE=4 SV=1	2	1	0.0176	64118.2	5.56
$1050-2	tr|A0A0C4DJ52|A0A0C4DJ52_FUSO4 SET domain-containing protein OS=Fusarium oxysporum f. sp. lycopersici (strain 4287 / CBS 123668 / FGSC 9935 / NRRL 34936) OX=426428 PE=4 SV=1	2	1	0.0194	58052.4	5.58
$1051-1	tr|A0A0J9WAP4|A0A0J9WAP4_FUSO4 Uncharacterized protein OS=Fusarium oxysporum f. sp. lycopersici (strain 4287 / CBS 123668 / FGSC 9935 / NRRL 34936) OX=426428 GN=FOXG_16868 PE=4 SV=1	2	1	0.0206	38283.8	4.91
$1051-2	tr|A0A0D2YK02|A0A0D2YK02_FUSO4 Methyltransf_11 domain-containing protein OS=Fusarium oxysporum f. sp. lycopersici (strain 4287 / CBS 123668 / FGSC 9935 / NRRL 34936) OX=426428 PE=4 SV=1	2	1	0.0293	27237.8	6.32
$1052-1	tr|A0A0J9WB47|A0A0J9WB47_FUSO4 F-box domain-containing protein OS=Fusarium oxysporum f. sp. lycopersici (strain 4287 / CBS 123668 / FGSC 9935 / NRRL 34936) OX=426428 GN=FOXG_16947 PE=4 SV=1	2	1	0.01	91772.8	7.31
$1053-1	tr|A0A0J9WBG1|A0A0J9WBG1_FUSO4 Uncharacterized protein OS=Fusarium oxysporum f. sp. lycopersici (strain 4287 / CBS 123668 / FGSC 9935 / NRRL 34936) OX=426428 GN=FOXG_17022 PE=4 SV=1	2	1	0.0241	32141.9	7.19
$1054-1	tr|A0A0J9WC96|A0A0J9WC96_FUSO4 Uncharacterized protein OS=Fusarium oxysporum f. sp. lycopersici (strain 4287 / CBS 123668 / FGSC 9935 / NRRL 34936) OX=426428 GN=FOXG_17161 PE=4 SV=1	2	1	0.0272	41126.3	10.45
$1054-2	tr|A0A0J9WC95|A0A0J9WC95_FUSO4 Uncharacterized protein OS=Fusarium oxysporum f. sp. lycopersici (strain 4287 / CBS 123668 / FGSC 9935 / NRRL 34936) OX=426428 GN=FOXG_17161 PE=4 SV=1	2	1	0.0275	40700.8	10.45
$1055-1	tr|A0A0J9WL18|A0A0J9WL18_FUSO4 Amidohydro-rel domain-containing protein OS=Fusarium oxysporum f. sp. lycopersici (strain 4287 / CBS 123668 / FGSC 9935 / NRRL 34936) OX=426428 GN=FOXG_05619 PE=4 SV=1	2	1	0.0143	52672.2	6.49
$1056-1	tr|A0A0J9WLY6|A0A0J9WLY6_FUSO4 Uncharacterized protein OS=Fusarium oxysporum f. sp. lycopersici (strain 4287 / CBS 123668 / FGSC 9935 / NRRL 34936) OX=426428 GN=FOXG_06657 PE=4 SV=1	2	1	0.0074	92916.2	6.74
$1056-2	tr|A0A0D2XTC1|A0A0D2XTC1_FUSO4 Uncharacterized protein OS=Fusarium oxysporum f. sp. lycopersici (strain 4287 / CBS 123668 / FGSC 9935 / NRRL 34936) OX=426428 PE=4 SV=1	2	1	0.0075	92196.6	7.77
$1056-3	tr|A0A0J9V034|A0A0J9V034_FUSO4 Uncharacterized protein OS=Fusarium oxysporum f. sp. lycopersici (strain 4287 / CBS 123668 / FGSC 9935 / NRRL 34936) OX=426428 GN=FOXG_06602 PE=4 SV=1	2	1	0.0071	97187.9	6.48
$1057-1	tr|A0A0J9WN04|A0A0J9WN04_FUSO4 Serine/threonine protein kinase OS=Fusarium oxysporum f. sp. lycopersici (strain 4287 / CBS 123668 / FGSC 9935 / NRRL 34936) OX=426428 GN=FOXG_19673 PE=4 SV=1	2	1	0.0054	162827	5.66
$1058-1	tr|A0A0J9WPH7|A0A0J9WPH7_FUSO4 Uncharacterized protein OS=Fusarium oxysporum f. sp. lycopersici (strain 4287 / CBS 123668 / FGSC 9935 / NRRL 34936) OX=426428 GN=FOXG_20134 PE=4 SV=1	2	1	0.0615	14941.8	6.83
$1059-1	sp|A0A0D2YFZ7|FUB12_FUSO4 Fusaric acid cluster transcription factor FUB12 OS=Fusarium oxysporum f. sp. lycopersici (strain 4287 / CBS 123668 / FGSC 9935 / NRRL 34936) OX=426428 GN=FUB12 PE=1 SV=1	1	1	0.0182	74726.9	6.24
$1060-1	sp|A0A0D2YG05|FUB5_FUSO4 Homoserine O-acetyltransferase FUB5 OS=Fusarium oxysporum f. sp. lycopersici (strain 4287 / CBS 123668 / FGSC 9935 / NRRL 34936) OX=426428 GN=FUB5 PE=1 SV=1	1	1	0.0331	40028.8	8.54
$1061-1	sp|A0A0D2YG09|FUB3_FUSO4 Aspartate kinase FUB3 OS=Fusarium oxysporum f. sp. lycopersici (strain 4287 / CBS 123668 / FGSC 9935 / NRRL 34936) OX=426428 GN=FUB3 PE=1 SV=1	1	1	0.0129	59730.8	5.37
$1062-1	tr|A0A0C4BKU7|A0A0C4BKU7_FUSO4 Uncharacterized protein OS=Fusarium oxysporum f. sp. lycopersici (strain 4287 / CBS 123668 / FGSC 9935 / NRRL 34936) OX=426428 PE=4 SV=1	1	1	0.0219	35988.4	5.99
$1062-2	tr|A0A0J9W4M4|A0A0J9W4M4_FUSO4 Uncharacterized protein OS=Fusarium oxysporum f. sp. lycopersici (strain 4287 / CBS 123668 / FGSC 9935 / NRRL 34936) OX=426428 GN=FOXG_15575 PE=4 SV=1	1	1	0.0149	52801.7	5.79
$1063-1	tr|A0A0C4BL43|A0A0C4BL43_FUSO4 Peptidase S59 domain-containing protein OS=Fusarium oxysporum f. sp. lycopersici (strain 4287 / CBS 123668 / FGSC 9935 / NRRL 34936) OX=426428 GN=FOXG_16385 PE=4 SV=1	1	1	0.0429	15860.5	6.31
$1064-1	tr|A0A0C4DHP6|A0A0C4DHP6_FUSO4 Histidine kinase OS=Fusarium oxysporum f. sp. lycopersici (strain 4287 / CBS 123668 / FGSC 9935 / NRRL 34936) OX=426428 GN=FOXG_01684 PE=4 SV=1	1	1	0.0064	119444	5.57
$1064-2	tr|D0ES97|D0ES97_FUSOX Histidine kinase OS=Fusarium oxysporum f. sp. lycopersici OX=59765 GN=hk1 PE=4 SV=1	1	1	0.0054	141828	5.39
$1065-1	tr|A0A0C4DHQ9|A0A0C4DHQ9_FUSO4 1,3-beta-D-glucan-UDP glucosyltransferase OS=Fusarium oxysporum f. sp. lycopersici (strain 4287 / CBS 123668 / FGSC 9935 / NRRL 34936) OX=426428 PE=3 SV=1	1	1	0.0067	203389	8.93
$1065-2	tr|A0A0J9UM95|A0A0J9UM95_FUSO4 1,3-beta-D-glucan-UDP glucosyltransferase OS=Fusarium oxysporum f. sp. lycopersici (strain 4287 / CBS 123668 / FGSC 9935 / NRRL 34936) OX=426428 GN=FOXG_03721 PE=3 SV=1	1	1	0.0064	212083	9.07
$1066-1	tr|A0A0C4DHR0|A0A0C4DHR0_FUSO4 White collar 1 OS=Fusarium oxysporum f. sp. lycopersici (strain 4287 / CBS 123668 / FGSC 9935 / NRRL 34936) OX=426428 GN=FOXG_03727 PE=4 SV=1	1	1	0.0127	111677	8.55
$1066-2	tr|A9Z0Q2|A9Z0Q2_FUSOX White collar 1 OS=Fusarium oxysporum f. sp. lycopersici OX=59765 GN=wc1 PE=4 SV=1	1	1	0.0127	111677	8.55
$1067-1	tr|A0A0C4DHS0|A0A0C4DHS0_FUSO4 Calmodulin OS=Fusarium oxysporum f. sp. lycopersici (strain 4287 / CBS 123668 / FGSC 9935 / NRRL 34936) OX=426428 GN=FOXG_04243 PE=3 SV=1	1	1	0.0318	24987.3	4.49
$1067-2	tr|A0A2C8D184|A0A2C8D184_FUSOX Calmodulin OS=Fusarium oxysporum f. sp. lycopersici OX=59765 GN=cal PE=3 SV=1	1	1	0.047	16996.5	4.11
$1068-1	tr|A0A0C4DHS6|A0A0C4DHS6_FUSO4 CAMK/CAMKL/AMPK protein kinase OS=Fusarium oxysporum f. sp. lycopersici (strain 4287 / CBS 123668 / FGSC 9935 / NRRL 34936) OX=426428 GN=FOXG_05528 PE=4 SV=1	1	1	0.0141	79745.8	6.8
$1068-2	tr|A0A0J9UTH8|A0A0J9UTH8_FUSO4 CAMK/CAMKL/AMPK protein kinase OS=Fusarium oxysporum f. sp. lycopersici (strain 4287 / CBS 123668 / FGSC 9935 / NRRL 34936) OX=426428 GN=FOXG_05528 PE=4 SV=1	1	1	0.0141	79294.3	6.93
$1069-1	tr|A0A0C4DHV8|A0A0C4DHV8_FUSO4 Cellulase OS=Fusarium oxysporum f. sp. lycopersici (strain 4287 / CBS 123668 / FGSC 9935 / NRRL 34936) OX=426428 PE=3 SV=1	1	1	0.0317	39403.6	8.78
$1069-2	tr|A0A0J9WQA5|A0A0J9WQA5_FUSO4 Cellulase OS=Fusarium oxysporum f. sp. lycopersici (strain 4287 / CBS 123668 / FGSC 9935 / NRRL 34936) OX=426428 GN=FOXG_10638 PE=3 SV=1	1	1	0.0291	43531.4	8.68
$1069-3	tr|A0A0J9VI04|A0A0J9VI04_FUSO4 Cellulase OS=Fusarium oxysporum f. sp. lycopersici (strain 4287 / CBS 123668 / FGSC 9935 / NRRL 34936) OX=426428 GN=FOXG_10638 PE=3 SV=1	1	1	0.0278	45487.6	8.88
$1070-1	tr|A0A0C4DHW7|A0A0C4DHW7_FUSO4 Endopolygalacturonase OS=Fusarium oxysporum f. sp. lycopersici (strain 4287 / CBS 123668 / FGSC 9935 / NRRL 34936) OX=426428 GN=FOXG_13051 PE=3 SV=1	1	1	0.0167	37177.2	8.63
$1070-2	tr|Q14TQ5|Q14TQ5_FUSOX Endopolygalacturonase OS=Fusarium oxysporum f. sp. lycopersici OX=59765 GN=pg5 PE=3 SV=1	1	1	0.0167	37177.2	8.63
$1070-3	tr|Q14TP7|Q14TP7_FUSOX Endopolygalacturonase OS=Fusarium oxysporum f. sp. lycopersici OX=59765 GN=pg5 PE=3 SV=1	1	1	0.0167	37190.2	8.63
$1071-1	tr|A0A0C4DHX1|A0A0C4DHX1_FUSO4 Predicted GMC oxidoreductase OS=Fusarium oxysporum f. sp. lycopersici (strain 4287 / CBS 123668 / FGSC 9935 / NRRL 34936) OX=426428 GN=FOXG_13301 PE=3 SV=1	1	1	0.0152	71207.7	5.25
$1072-1	tr|A0A0C4DHX6|A0A0C4DHX6_FUSO4 Histone H3 OS=Fusarium oxysporum f. sp. lycopersici (strain 4287 / CBS 123668 / FGSC 9935 / NRRL 34936) OX=426428 GN=FOXG_13952 PE=3 SV=1	1	1	0.0588	15391.7	11.15
$1072-2	tr|A0A0D2YGH0|A0A0D2YGH0_FUSO4 Uncharacterized protein OS=Fusarium oxysporum f. sp. lycopersici (strain 4287 / CBS 123668 / FGSC 9935 / NRRL 34936) OX=426428 GN=FOXG_15410 PE=4 SV=1	1	1	0.0081	113172	5.75
$1073-1	tr|A0A0C4DI40|A0A0C4DI40_FUSO4 Gluconolactonase OS=Fusarium oxysporum f. sp. lycopersici (strain 4287 / CBS 123668 / FGSC 9935 / NRRL 34936) OX=426428 GN=FOXG_16906 PE=4 SV=1	1	1	0.0175	43206.1	5.1
$1074-1	tr|A0A0C4DI55|A0A0C4DI55_FUSO4 Uncharacterized protein OS=Fusarium oxysporum f. sp. lycopersici (strain 4287 / CBS 123668 / FGSC 9935 / NRRL 34936) OX=426428 GN=FOXG_16948 PE=4 SV=1	1	1	0.0199	65834.1	8.5
$1075-1	tr|A0A0C4DI74|A0A0C4DI74_FUSO4 NmrA domain-containing protein OS=Fusarium oxysporum f. sp. lycopersici (strain 4287 / CBS 123668 / FGSC 9935 / NRRL 34936) OX=426428 GN=FOXG_16967 PE=4 SV=1	1	1	0.0231	38155.8	6.13
$1076-1	tr|A0A0C4DI75|A0A0C4DI75_FUSO4 GMC_OxRdtase_N domain-containing protein OS=Fusarium oxysporum f. sp. lycopersici (strain 4287 / CBS 123668 / FGSC 9935 / NRRL 34936) OX=426428 GN=FOXG_16968 PE=3 SV=1	1	1	0.0167	60124.2	6.09
$1077-1	tr|A0A0C4DI85|A0A0C4DI85_FUSO4 Alginate_lyase domain-containing protein OS=Fusarium oxysporum f. sp. lycopersici (strain 4287 / CBS 123668 / FGSC 9935 / NRRL 34936) OX=426428 PE=3 SV=1	1	1	0.023	43644.1	8.71
$1078-1	tr|A0A0C4DIA7|A0A0C4DIA7_FUSO4 Uncharacterized protein OS=Fusarium oxysporum f. sp. lycopersici (strain 4287 / CBS 123668 / FGSC 9935 / NRRL 34936) OX=426428 GN=FOXG_17000 PE=3 SV=1	1	1	0.0105	52722.8	5.15
$1079-1	tr|A0A0C4DIG0|A0A0C4DIG0_FUSO4 AAA domain-containing protein OS=Fusarium oxysporum f. sp. lycopersici (strain 4287 / CBS 123668 / FGSC 9935 / NRRL 34936) OX=426428 PE=4 SV=1	1	1	0.0065	122158	5.82
$1079-2	tr|A0A0J9WBB8|A0A0J9WBB8_FUSO4 AAA domain-containing protein OS=Fusarium oxysporum f. sp. lycopersici (strain 4287 / CBS 123668 / FGSC 9935 / NRRL 34936) OX=426428 GN=FOXG_17144 PE=4 SV=1	1	1	0.0052	153075	5.74
$1080-1	tr|A0A0C4DII2|A0A0C4DII2_FUSO4 Uncharacterized protein OS=Fusarium oxysporum f. sp. lycopersici (strain 4287 / CBS 123668 / FGSC 9935 / NRRL 34936) OX=426428 PE=4 SV=1	1	1	0.0122	64424.4	5.58
$1081-1	tr|A0A0C4DIJ2|A0A0C4DIJ2_FUSO4 Uncharacterized protein OS=Fusarium oxysporum f. sp. lycopersici (strain 4287 / CBS 123668 / FGSC 9935 / NRRL 34936) OX=426428 PE=4 SV=1	1	1	0.0122	56225.5	6.17
$1081-2	tr|A0A0J9WVV6|A0A0J9WVV6_FUSO4 Uncharacterized protein OS=Fusarium oxysporum f. sp. lycopersici (strain 4287 / CBS 123668 / FGSC 9935 / NRRL 34936) OX=426428 GN=FOXG_17176 PE=4 SV=1	1	1	0.0074	92327.6	5.84
$1082-1	tr|A0A0C4DIL8|A0A0C4DIL8_FUSO4 Uncharacterized protein OS=Fusarium oxysporum f. sp. lycopersici (strain 4287 / CBS 123668 / FGSC 9935 / NRRL 34936) OX=426428 PE=4 SV=1	1	1	0.0389	29230.6	5.04
$1082-2	tr|A0A0J9WBS8|A0A0J9WBS8_FUSO4 Uncharacterized protein OS=Fusarium oxysporum f. sp. lycopersici (strain 4287 / CBS 123668 / FGSC 9935 / NRRL 34936) OX=426428 GN=FOXG_17251 PE=4 SV=1	1	1	0.0241	46721.8	5.45
$1083-1	tr|A0A0C4DIP0|A0A0C4DIP0_FUSO4 Dimer_Tnp_hAT domain-containing protein OS=Fusarium oxysporum f. sp. lycopersici (strain 4287 / CBS 123668 / FGSC 9935 / NRRL 34936) OX=426428 PE=4 SV=1	1	1	0.0128	61300.6	8.66
$1083-2	tr|A0A0J9W4T9|A0A0J9W4T9_FUSO4 Uncharacterized protein OS=Fusarium oxysporum f. sp. lycopersici (strain 4287 / CBS 123668 / FGSC 9935 / NRRL 34936) OX=426428 GN=FOXG_22053 PE=4 SV=1	1	1	0.0324	24604.5	9.16
$1083-3	tr|A0A0J9WUV1|A0A0J9WUV1_FUSO4 CCHC-type domain-containing protein OS=Fusarium oxysporum f. sp. lycopersici (strain 4287 / CBS 123668 / FGSC 9935 / NRRL 34936) OX=426428 GN=FOXG_22229 PE=4 SV=1	1	1	0.0156	49947	6.66
$1084-1	tr|A0A0C4DIQ2|A0A0C4DIQ2_FUSO4 NACHT domain-containing protein OS=Fusarium oxysporum f. sp. lycopersici (strain 4287 / CBS 123668 / FGSC 9935 / NRRL 34936) OX=426428 PE=4 SV=1	1	1	0.0134	51175	7.57
$1084-2	tr|A0A0D2XEH5|A0A0D2XEH5_FUSO4 CMGC/CLK protein kinase OS=Fusarium oxysporum f. sp. lycopersici (strain 4287 / CBS 123668 / FGSC 9935 / NRRL 34936) OX=426428 GN=FOXG_02307 PE=4 SV=1	1	1	0.0085	79232.9	9.44
$1084-3	tr|A0A0J9W9M7|A0A0J9W9M7_FUSO4 NACHT domain-containing protein OS=Fusarium oxysporum f. sp. lycopersici (strain 4287 / CBS 123668 / FGSC 9935 / NRRL 34936) OX=426428 GN=FOXG_22733 PE=4 SV=1	1	1	0.007	97408.7	7.05
$1085-1	tr|A0A0C4DIS8|A0A0C4DIS8_FUSO4 Uncharacterized protein OS=Fusarium oxysporum f. sp. lycopersici (strain 4287 / CBS 123668 / FGSC 9935 / NRRL 34936) OX=426428 PE=4 SV=1	1	1	0.0203	44450.4	6.34
$1085-2	tr|A0A0J9WAA2|A0A0J9WAA2_FUSO4 Uncharacterized protein OS=Fusarium oxysporum f. sp. lycopersici (strain 4287 / CBS 123668 / FGSC 9935 / NRRL 34936) OX=426428 GN=FOXG_17347 PE=4 SV=1	1	1	0.0123	73375.9	6.29
$1086-1	tr|A0A0C4DIU3|A0A0C4DIU3_FUSO4 Abhydrolase_3 domain-containing protein OS=Fusarium oxysporum f. sp. lycopersici (strain 4287 / CBS 123668 / FGSC 9935 / NRRL 34936) OX=426428 GN=FOXG_17362 PE=4 SV=1	1	1	0.0187	34888.8	5.36
$1087-1	tr|A0A0C4DIW2|A0A0C4DIW2_FUSO4 FAD_binding_3 domain-containing protein OS=Fusarium oxysporum f. sp. lycopersici (strain 4287 / CBS 123668 / FGSC 9935 / NRRL 34936) OX=426428 GN=FOXG_17381 PE=4 SV=1	1	1	0.015	51744.2	5.51
$1088-1	tr|A0A0C4DJ04|A0A0C4DJ04_FUSO4 AlcB domain-containing protein OS=Fusarium oxysporum f. sp. lycopersici (strain 4287 / CBS 123668 / FGSC 9935 / NRRL 34936) OX=426428 GN=FOXG_17423 PE=3 SV=1	1	1	0.0139	49267.6	6.25
$1089-1	tr|A0A0C4DJ29|A0A0C4DJ29_FUSO4 Uncharacterized protein OS=Fusarium oxysporum f. sp. lycopersici (strain 4287 / CBS 123668 / FGSC 9935 / NRRL 34936) OX=426428 PE=4 SV=1	1	1	0.0055	123700	8.23
$1089-2	tr|A0A0D2XT12|A0A0D2XT12_FUSO4 Uncharacterized protein OS=Fusarium oxysporum f. sp. lycopersici (strain 4287 / CBS 123668 / FGSC 9935 / NRRL 34936) OX=426428 PE=4 SV=1	1	1	0.0065	105142	7.83
$1089-3	tr|A0A0J9V6A3|A0A0J9V6A3_FUSO4 Uncharacterized protein OS=Fusarium oxysporum f. sp. lycopersici (strain 4287 / CBS 123668 / FGSC 9935 / NRRL 34936) OX=426428 GN=FOXG_07114 PE=4 SV=1	1	1	0.0054	126333	8.35
$1089-4	tr|A0A0J9WB03|A0A0J9WB03_FUSO4 Uncharacterized protein OS=Fusarium oxysporum f. sp. lycopersici (strain 4287 / CBS 123668 / FGSC 9935 / NRRL 34936) OX=426428 GN=FOXG_17467 PE=4 SV=1	1	1	0.0054	124293	8.23
$1090-1	tr|A0A0C4DJ93|A0A0C4DJ93_FUSO4 Gal4_dimer domain-containing protein OS=Fusarium oxysporum f. sp. lycopersici (strain 4287 / CBS 123668 / FGSC 9935 / NRRL 34936) OX=426428 PE=4 SV=1	1	1	0.0392	16727.3	4.63
$1090-2	tr|A0A0J9WW18|A0A0J9WW18_FUSO4 Gal4_dimer domain-containing protein OS=Fusarium oxysporum f. sp. lycopersici (strain 4287 / CBS 123668 / FGSC 9935 / NRRL 34936) OX=426428 GN=FOXG_22842 PE=4 SV=1	1	1	0.017	39702.2	4.66
$1091-1	tr|A0A0C4DJE7|A0A0C4DJE7_FUSO4 Uncharacterized protein OS=Fusarium oxysporum f. sp. lycopersici (strain 4287 / CBS 123668 / FGSC 9935 / NRRL 34936) OX=426428 PE=4 SV=1	1	1	0.0597	14689.3	6.49
$1091-2	tr|A0A0J9WCL5|A0A0J9WCL5_FUSO4 Zn(2)-C6 fungal-type domain-containing protein OS=Fusarium oxysporum f. sp. lycopersici (strain 4287 / CBS 123668 / FGSC 9935 / NRRL 34936) OX=426428 GN=FOXG_17597 PE=4 SV=1	1	1	0.0165	54819.3	7.18
$1092-1	tr|A0A0C4DJL2|A0A0C4DJL2_FUSO4 PKS_ER domain-containing protein OS=Fusarium oxysporum f. sp. lycopersici (strain 4287 / CBS 123668 / FGSC 9935 / NRRL 34936) OX=426428 PE=4 SV=1	1	1	0.021	40623.2	7.61
$1093-1	tr|A0A0C4DJL7|A0A0C4DJL7_FUSO4 MFS domain-containing protein OS=Fusarium oxysporum f. sp. lycopersici (strain 4287 / CBS 123668 / FGSC 9935 / NRRL 34936) OX=426428 GN=FOXG_17668 PE=3 SV=1	1	1	0.0146	60925.6	6.75
$1094-1	tr|A0A0C4DJM0|A0A0C4DJM0_FUSO4 FAD_binding_2 domain-containing protein OS=Fusarium oxysporum f. sp. lycopersici (strain 4287 / CBS 123668 / FGSC 9935 / NRRL 34936) OX=426428 GN=FOXG_17671 PE=4 SV=1	1	1	0.01	65500.8	6.3
$1095-1	tr|A0A0C4DJN5|A0A0C4DJN5_FUSO4 CHAT domain-containing protein OS=Fusarium oxysporum f. sp. lycopersici (strain 4287 / CBS 123668 / FGSC 9935 / NRRL 34936) OX=426428 GN=FOXG_17688 PE=4 SV=1	1	1	0.0182	37013.6	8.77
$1096-1	tr|A0A0D2X803|A0A0D2X803_FUSO4 DNA_MISMATCH_REPAIR_2 domain-containing protein OS=Fusarium oxysporum f. sp. lycopersici (strain 4287 / CBS 123668 / FGSC 9935 / NRRL 34936) OX=426428 PE=4 SV=1	1	1	0.0265	49537.4	4.83
$1096-2	tr|A0A0J9U3M9|A0A0J9U3M9_FUSO4 DNA mismatch repair protein MSH5 OS=Fusarium oxysporum f. sp. lycopersici (strain 4287 / CBS 123668 / FGSC 9935 / NRRL 34936) OX=426428 GN=FOXG_00009 PE=4 SV=1	1	1	0.0126	104067	5.76
$1097-1	tr|A0A0D2X804|A0A0D2X804_FUSO4 DNA mismatch repair protein MSH5 OS=Fusarium oxysporum f. sp. lycopersici (strain 4287 / CBS 123668 / FGSC 9935 / NRRL 34936) OX=426428 GN=FOXG_00010 PE=3 SV=1	1	1	0.1095	15183.2	7.02
$1098-1	tr|A0A0D2X827|A0A0D2X827_FUSO4 AP endonuclease 1 OS=Fusarium oxysporum f. sp. lycopersici (strain 4287 / CBS 123668 / FGSC 9935 / NRRL 34936) OX=426428 GN=FOXG_00033 PE=3 SV=1	1	1	0.0154	49983.1	9.08
$1099-1	tr|A0A0D2X828|A0A0D2X828_FUSO4 BUB protein kinase OS=Fusarium oxysporum f. sp. lycopersici (strain 4287 / CBS 123668 / FGSC 9935 / NRRL 34936) OX=426428 GN=FOXG_00034 PE=4 SV=1	1	1	0.0049	136386	4.99
$1100-1	tr|A0A0D2X837|A0A0D2X837_FUSO4 Uncharacterized protein OS=Fusarium oxysporum f. sp. lycopersici (strain 4287 / CBS 123668 / FGSC 9935 / NRRL 34936) OX=426428 PE=4 SV=1	1	1	0.0077	140773	4.36
$1100-2	tr|A0A0J9U3R8|A0A0J9U3R8_FUSO4 Uncharacterized protein OS=Fusarium oxysporum f. sp. lycopersici (strain 4287 / CBS 123668 / FGSC 9935 / NRRL 34936) OX=426428 GN=FOXG_17790 PE=4 SV=1	1	1	0.0058	190762	4.63
$1101-1	tr|A0A0D2X839|A0A0D2X839_FUSO4 TMF_TATA_bd domain-containing protein OS=Fusarium oxysporum f. sp. lycopersici (strain 4287 / CBS 123668 / FGSC 9935 / NRRL 34936) OX=426428 GN=FOXG_00045 PE=4 SV=1	1	1	0.0058	95976.5	5.28
$1102-1	tr|A0A0D2X843|A0A0D2X843_FUSO4 Uncharacterized protein OS=Fusarium oxysporum f. sp. lycopersici (strain 4287 / CBS 123668 / FGSC 9935 / NRRL 34936) OX=426428 PE=4 SV=1	1	1	0.0188	53770	8.85
$1102-2	tr|A0A0J9WFN1|A0A0J9WFN1_FUSO4 Uncharacterized protein OS=Fusarium oxysporum f. sp. lycopersici (strain 4287 / CBS 123668 / FGSC 9935 / NRRL 34936) OX=426428 GN=FOXG_00049 PE=4 SV=1	1	1	0.0182	55457.9	9.06
$1103-1	tr|A0A0D2X845|A0A0D2X845_FUSO4 Prolyl-tRNA synthetase OS=Fusarium oxysporum f. sp. lycopersici (strain 4287 / CBS 123668 / FGSC 9935 / NRRL 34936) OX=426428 GN=FOXG_00051 PE=3 SV=1	1	1	0.0116	66429.9	5.62
$1104-1	tr|A0A0D2X856|A0A0D2X856_FUSO4 LIM zinc-binding domain-containing protein OS=Fusarium oxysporum f. sp. lycopersici (strain 4287 / CBS 123668 / FGSC 9935 / NRRL 34936) OX=426428 PE=4 SV=1	1	1	0.011	80584.7	8.56
$1105-1	tr|A0A0D2X859|A0A0D2X859_FUSO4 Uncharacterized protein OS=Fusarium oxysporum f. sp. lycopersici (strain 4287 / CBS 123668 / FGSC 9935 / NRRL 34936) OX=426428 PE=4 SV=1	1	1	0.0076	147187	8.18
$1105-2	tr|A0A0J9WFN7|A0A0J9WFN7_FUSO4 Uncharacterized protein OS=Fusarium oxysporum f. sp. lycopersici (strain 4287 / CBS 123668 / FGSC 9935 / NRRL 34936) OX=426428 GN=FOXG_00067 PE=4 SV=1	1	1	0.0071	157637	8.32
$1106-1	tr|A0A0D2X874|A0A0D2X874_FUSO4 Uncharacterized protein OS=Fusarium oxysporum f. sp. lycopersici (strain 4287 / CBS 123668 / FGSC 9935 / NRRL 34936) OX=426428 GN=FOXG_00082 PE=4 SV=1	1	1	0.0166	65336.2	9.2
$1107-1	tr|A0A0D2X892|A0A0D2X892_FUSO4 Uncharacterized protein OS=Fusarium oxysporum f. sp. lycopersici (strain 4287 / CBS 123668 / FGSC 9935 / NRRL 34936) OX=426428 GN=FOXG_00101 PE=3 SV=1	1	1	0.0169	60706.8	9.05
$1108-1	tr|A0A0D2X894|A0A0D2X894_FUSO4 Uncharacterized protein OS=Fusarium oxysporum f. sp. lycopersici (strain 4287 / CBS 123668 / FGSC 9935 / NRRL 34936) OX=426428 GN=FOXG_00103 PE=4 SV=1	1	1	0.0144	52388.4	5.83
$1109-1	tr|A0A0D2X8A1|A0A0D2X8A1_FUSO4 Uncharacterized protein OS=Fusarium oxysporum f. sp. lycopersici (strain 4287 / CBS 123668 / FGSC 9935 / NRRL 34936) OX=426428 GN=FOXG_00110 PE=4 SV=1	1	1	0.0062	107714	6.44
$1110-1	tr|A0A0D2X8C2|A0A0D2X8C2_FUSO4 Ditrans,polycis-polyprenyl diphosphate synthase ((2E,6E)-farnesyldiphosphate specific) OS=Fusarium oxysporum f. sp. lycopersici (strain 4287 / CBS 123668 / FGSC 9935 / NRRL 34936) OX=426428 GN=FOXG_00131 PE=3 SV=1	1	1	0.0245	37802.2	9.04
$1110-2	tr|A0A0J9U3T0|A0A0J9U3T0_FUSO4 Ditrans,polycis-polyprenyl diphosphate synthase ((2E,6E)-farnesyldiphosphate specific) OS=Fusarium oxysporum f. sp. lycopersici (strain 4287 / CBS 123668 / FGSC 9935 / NRRL 34936) OX=426428 GN=FOXG_00131 PE=3 SV=1	1	1	0.0256	35928.2	9.26
$1111-1	tr|A0A0D2X8C3|A0A0D2X8C3_FUSO4 tRNA (guanine(37)-N1)-methyltransferase OS=Fusarium oxysporum f. sp. lycopersici (strain 4287 / CBS 123668 / FGSC 9935 / NRRL 34936) OX=426428 GN=TRM5 PE=3 SV=1	1	1	0.0172	52446.4	6.26
$1112-1	tr|A0A0D2X8C5|A0A0D2X8C5_FUSO4 RNB domain-containing protein OS=Fusarium oxysporum f. sp. lycopersici (strain 4287 / CBS 123668 / FGSC 9935 / NRRL 34936) OX=426428 GN=FOXG_00134 PE=4 SV=1	1	1	0.0076	117550	6.2
$1113-1	tr|A0A0D2X8C6|A0A0D2X8C6_FUSO4 Uncharacterized protein OS=Fusarium oxysporum f. sp. lycopersici (strain 4287 / CBS 123668 / FGSC 9935 / NRRL 34936) OX=426428 GN=FOXG_00135 PE=4 SV=1	1	1	0.0115	65510.5	5.44
$1114-1	tr|A0A0D2X8D7|A0A0D2X8D7_FUSO4 Tyrosine 3-monooxygenase/tryptophan 5-monooxygenase activation protein OS=Fusarium oxysporum f. sp. lycopersici (strain 4287 / CBS 123668 / FGSC 9935 / NRRL 34936) OX=426428 GN=FOXG_00146 PE=3 SV=1	1	1	0.0474	24051.3	8.52
$1114-2	tr|A0A0J9U6T0|A0A0J9U6T0_FUSO4 Tyrosine 3-monooxygenase/tryptophan 5-monooxygenase activation protein OS=Fusarium oxysporum f. sp. lycopersici (strain 4287 / CBS 123668 / FGSC 9935 / NRRL 34936) OX=426428 GN=FOXG_00146 PE=3 SV=1	1	1	0.0532	21292.3	8.99
$1115-1	tr|A0A0D2X8G3|A0A0D2X8G3_FUSO4 Carbamoyl-phosphate synthase arginine-specific large chain OS=Fusarium oxysporum f. sp. lycopersici (strain 4287 / CBS 123668 / FGSC 9935 / NRRL 34936) OX=426428 GN=FOXG_00172 PE=4 SV=1	1	1	0.0085	128945	5.48
$1116-1	tr|A0A0D2X8H1|A0A0D2X8H1_FUSO4 Replication factor C subunit 2 OS=Fusarium oxysporum f. sp. lycopersici (strain 4287 / CBS 123668 / FGSC 9935 / NRRL 34936) OX=426428 GN=FOXG_00180 PE=3 SV=1	1	1	0.0209	42315	8.39
$1117-1	tr|A0A0D2X8H8|A0A0D2X8H8_FUSO4 Uncharacterized protein OS=Fusarium oxysporum f. sp. lycopersici (strain 4287 / CBS 123668 / FGSC 9935 / NRRL 34936) OX=426428 GN=FOXG_00187 PE=4 SV=1	1	1	0.02	49683.8	6.4
$1118-1	tr|A0A0D2X8I3|A0A0D2X8I3_FUSO4 Mago-bind domain-containing protein OS=Fusarium oxysporum f. sp. lycopersici (strain 4287 / CBS 123668 / FGSC 9935 / NRRL 34936) OX=426428 GN=FOXG_00192 PE=3 SV=1	1	1	0.0313	21085.3	7.76
$1119-1	tr|A0A0D2X8J2|A0A0D2X8J2_FUSO4 Protein-serine/threonine kinase OS=Fusarium oxysporum f. sp. lycopersici (strain 4287 / CBS 123668 / FGSC 9935 / NRRL 34936) OX=426428 GN=FOXG_00201 PE=4 SV=1	1	1	0.0408	17064.9	5.5
$1120-1	tr|A0A0D2X8K7|A0A0D2X8K7_FUSO4 Ribosome production factor 2 homolog OS=Fusarium oxysporum f. sp. lycopersici (strain 4287 / CBS 123668 / FGSC 9935 / NRRL 34936) OX=426428 GN=FOXG_00216 PE=3 SV=1	1	1	0.0315	36209.3	9.57
$1121-1	tr|A0A0D2X8M3|A0A0D2X8M3_FUSO4 YTH domain-containing protein OS=Fusarium oxysporum f. sp. lycopersici (strain 4287 / CBS 123668 / FGSC 9935 / NRRL 34936) OX=426428 PE=4 SV=1	1	1	0.0216	45612.8	7.74
$1122-1	tr|A0A0D2X8M9|A0A0D2X8M9_FUSO4 Uncharacterized protein OS=Fusarium oxysporum f. sp. lycopersici (strain 4287 / CBS 123668 / FGSC 9935 / NRRL 34936) OX=426428 PE=4 SV=1	1	1	0.0393	32554.8	9.38
$1123-1	tr|A0A0D2X8N0|A0A0D2X8N0_FUSO4 V-type proton ATPase subunit H OS=Fusarium oxysporum f. sp. lycopersici (strain 4287 / CBS 123668 / FGSC 9935 / NRRL 34936) OX=426428 GN=FOXG_00239 PE=3 SV=1	1	1	0.0188	53518.5	5.64
$1124-1	tr|A0A0D2X8N2|A0A0D2X8N2_FUSO4 Endopolyphosphatase OS=Fusarium oxysporum f. sp. lycopersici (strain 4287 / CBS 123668 / FGSC 9935 / NRRL 34936) OX=426428 GN=FOXG_00241 PE=3 SV=1	1	1	0.0169	81083.9	6.36
$1124-2	tr|A0A0J9U4F1|A0A0J9U4F1_FUSO4 Endopolyphosphatase OS=Fusarium oxysporum f. sp. lycopersici (strain 4287 / CBS 123668 / FGSC 9935 / NRRL 34936) OX=426428 GN=FOXG_00241 PE=3 SV=1	1	1	0.018	76374.4	6.13
$1125-1	tr|A0A0D2X8P2|A0A0D2X8P2_FUSO4 Post-GPI attachment to proteins factor 3 OS=Fusarium oxysporum f. sp. lycopersici (strain 4287 / CBS 123668 / FGSC 9935 / NRRL 34936) OX=426428 GN=FOXG_00251 PE=3 SV=1	1	1	0.0242	38600.6	9.37
$1125-2	tr|A0A0J9U7H1|A0A0J9U7H1_FUSO4 Post-GPI attachment to proteins factor 3 OS=Fusarium oxysporum f. sp. lycopersici (strain 4287 / CBS 123668 / FGSC 9935 / NRRL 34936) OX=426428 GN=FOXG_00251 PE=3 SV=1	1	1	0.0256	36569.3	9.39
$1125-3	tr|A0A0J9WFX1|A0A0J9WFX1_FUSO4 Post-GPI attachment to proteins factor 3 OS=Fusarium oxysporum f. sp. lycopersici (strain 4287 / CBS 123668 / FGSC 9935 / NRRL 34936) OX=426428 GN=FOXG_00251 PE=3 SV=1	1	1	0.0327	29137.6	9.67
$1126-1	tr|A0A0D2X8S7|A0A0D2X8S7_FUSO4 Phenylalanine--tRNA ligase OS=Fusarium oxysporum f. sp. lycopersici (strain 4287 / CBS 123668 / FGSC 9935 / NRRL 34936) OX=426428 GN=FOXG_00286 PE=3 SV=1	1	1	0.0104	65466.8	6.77
$1127-1	tr|A0A0D2X8U6|A0A0D2X8U6_FUSO4 J domain-containing protein OS=Fusarium oxysporum f. sp. lycopersici (strain 4287 / CBS 123668 / FGSC 9935 / NRRL 34936) OX=426428 GN=FOXG_00305 PE=4 SV=1	1	1	0.0431	25585	5.21
$1128-1	tr|A0A0D2X8W0|A0A0D2X8W0_FUSO4 RalA-binding protein 1 OS=Fusarium oxysporum f. sp. lycopersici (strain 4287 / CBS 123668 / FGSC 9935 / NRRL 34936) OX=426428 GN=FOXG_00319 PE=4 SV=1	1	1	0.006	163252	7.94
$1128-2	tr|A0A0J9U5P6|A0A0J9U5P6_FUSO4 RalA-binding protein 1 OS=Fusarium oxysporum f. sp. lycopersici (strain 4287 / CBS 123668 / FGSC 9935 / NRRL 34936) OX=426428 GN=FOXG_00319 PE=4 SV=1	1	1	0.0068	144356	7.2
$1129-1	tr|A0A0D2X8Y3|A0A0D2X8Y3_FUSO4 Anaphase-promoting complex subunit 2 OS=Fusarium oxysporum f. sp. lycopersici (strain 4287 / CBS 123668 / FGSC 9935 / NRRL 34936) OX=426428 GN=FOXG_00343 PE=3 SV=1	1	1	0.0058	97635.6	5.57
$1129-2	tr|A0A0D2XWW3|A0A0D2XWW3_FUSO4 Origin recognition complex subunit 4 OS=Fusarium oxysporum f. sp. lycopersici (strain 4287 / CBS 123668 / FGSC 9935 / NRRL 34936) OX=426428 GN=FOXG_08479 PE=3 SV=1	1	1	0.0065	84335.2	6.98
$1130-1	tr|A0A0D2X921|A0A0D2X921_FUSO4 Uncharacterized protein OS=Fusarium oxysporum f. sp. lycopersici (strain 4287 / CBS 123668 / FGSC 9935 / NRRL 34936) OX=426428 PE=4 SV=1	1	1	0.0068	100600	5.51
$1130-2	tr|A0A0J9U635|A0A0J9U635_FUSO4 Uncharacterized protein OS=Fusarium oxysporum f. sp. lycopersici (strain 4287 / CBS 123668 / FGSC 9935 / NRRL 34936) OX=426428 GN=FOXG_00381 PE=4 SV=1	1	1	0.006	113304	5.62
$1131-1	tr|A0A0D2X934|A0A0D2X934_FUSO4 Eburicol 14-alpha-demethylase OS=Fusarium oxysporum f. sp. lycopersici (strain 4287 / CBS 123668 / FGSC 9935 / NRRL 34936) OX=426428 GN=FOXG_00394 PE=3 SV=1	1	1	0.0152	59543.6	6.86
$1132-1	tr|A0A0D2X936|A0A0D2X936_FUSO4 Nucleolin OS=Fusarium oxysporum f. sp. lycopersici (strain 4287 / CBS 123668 / FGSC 9935 / NRRL 34936) OX=426428 GN=FOXG_00396 PE=4 SV=1	1	1	0.018	51978.8	4.95
$1132-2	tr|A0A0J9U569|A0A0J9U569_FUSO4 Nucleolin OS=Fusarium oxysporum f. sp. lycopersici (strain 4287 / CBS 123668 / FGSC 9935 / NRRL 34936) OX=426428 GN=FOXG_00396 PE=4 SV=1	1	1	0.018	51850.6	4.92
$1133-1	tr|A0A0D2X937|A0A0D2X937_FUSO4 NADH dehydrogenase OS=Fusarium oxysporum f. sp. lycopersici (strain 4287 / CBS 123668 / FGSC 9935 / NRRL 34936) OX=426428 GN=FOXG_00397 PE=4 SV=1	1	1	0.0787	14481.2	6.9
$1134-1	tr|A0A0D2X992|A0A0D2X992_FUSO4 Transcription initiation factor TFIIB OS=Fusarium oxysporum f. sp. lycopersici (strain 4287 / CBS 123668 / FGSC 9935 / NRRL 34936) OX=426428 GN=FOXG_00452 PE=3 SV=1	1	1	0.0173	37679.1	6.26
$1135-1	tr|A0A0D2X9A7|A0A0D2X9A7_FUSO4 Uncharacterized protein OS=Fusarium oxysporum f. sp. lycopersici (strain 4287 / CBS 123668 / FGSC 9935 / NRRL 34936) OX=426428 GN=FOXG_00467 PE=4 SV=1	1	1	0.0061	127117	5.64
$1136-1	tr|A0A0D2X9C7|A0A0D2X9C7_FUSO4 Uncharacterized protein OS=Fusarium oxysporum f. sp. lycopersici (strain 4287 / CBS 123668 / FGSC 9935 / NRRL 34936) OX=426428 GN=FOXG_00488 PE=4 SV=1	1	1	0.0163	60630.9	5.84
$1137-1	tr|A0A0D2X9D2|A0A0D2X9D2_FUSO4 Uncharacterized protein OS=Fusarium oxysporum f. sp. lycopersici (strain 4287 / CBS 123668 / FGSC 9935 / NRRL 34936) OX=426428 PE=4 SV=1	1	1	0.0215	35277.6	9.07
$1137-2	tr|A0A0J9WG57|A0A0J9WG57_FUSO4 Uncharacterized protein OS=Fusarium oxysporum f. sp. lycopersici (strain 4287 / CBS 123668 / FGSC 9935 / NRRL 34936) OX=426428 GN=FOXG_00493 PE=4 SV=1	1	1	0.0226	33264.2	8.94
$1138-1	tr|A0A0D2X9E1|A0A0D2X9E1_FUSO4 Uncharacterized protein OS=Fusarium oxysporum f. sp. lycopersici (strain 4287 / CBS 123668 / FGSC 9935 / NRRL 34936) OX=426428 PE=4 SV=1	1	1	0.0112	60222.8	5.6
$1138-2	tr|A0A0J9U5K3|A0A0J9U5K3_FUSO4 Uncharacterized protein OS=Fusarium oxysporum f. sp. lycopersici (strain 4287 / CBS 123668 / FGSC 9935 / NRRL 34936) OX=426428 GN=FOXG_00502 PE=4 SV=1	1	1	0.0112	60354	5.6
$1139-1	tr|A0A0D2X9E3|A0A0D2X9E3_FUSO4 Bloom syndrome protein OS=Fusarium oxysporum f. sp. lycopersici (strain 4287 / CBS 123668 / FGSC 9935 / NRRL 34936) OX=426428 GN=FOXG_00504 PE=3 SV=1	1	1	0.0054	184416	6.75
$1140-1	tr|A0A0D2X9E5|A0A0D2X9E5_FUSO4 Uncharacterized protein OS=Fusarium oxysporum f. sp. lycopersici (strain 4287 / CBS 123668 / FGSC 9935 / NRRL 34936) OX=426428 GN=FOXG_00506 PE=4 SV=1	1	1	0.0561	20344.2	6.18
$1141-1	tr|A0A0D2X9F3|A0A0D2X9F3_FUSO4 N-acetyltransferase domain-containing protein OS=Fusarium oxysporum f. sp. lycopersici (strain 4287 / CBS 123668 / FGSC 9935 / NRRL 34936) OX=426428 GN=FOXG_00516 PE=4 SV=1	1	1	0.0309	21551	5.8
$1142-1	tr|A0A0D2X9L5|A0A0D2X9L5_FUSO4 Nuclear architecture-related protein 1 OS=Fusarium oxysporum f. sp. lycopersici (strain 4287 / CBS 123668 / FGSC 9935 / NRRL 34936) OX=426428 GN=FOXG_00580 PE=3 SV=1	1	1	0.0191	61448.9	5.59
$1143-1	tr|A0A0D2X9M4|A0A0D2X9M4_FUSO4 IU_nuc_hydro domain-containing protein OS=Fusarium oxysporum f. sp. lycopersici (strain 4287 / CBS 123668 / FGSC 9935 / NRRL 34936) OX=426428 PE=3 SV=1	1	1	0.0169	39138	5.36
$1143-2	tr|A0A0J9WG98|A0A0J9WG98_FUSO4 IU_nuc_hydro domain-containing protein OS=Fusarium oxysporum f. sp. lycopersici (strain 4287 / CBS 123668 / FGSC 9935 / NRRL 34936) OX=426428 GN=FOXG_00589 PE=3 SV=1	1	1	0.0139	47610.8	5.34
$1144-1	tr|A0A0D2X9N0|A0A0D2X9N0_FUSO4 Ubiquitin-like domain-containing protein OS=Fusarium oxysporum f. sp. lycopersici (strain 4287 / CBS 123668 / FGSC 9935 / NRRL 34936) OX=426428 GN=FOXG_00595 PE=4 SV=1	1	1	0.0123	54817.5	5.51
$1145-1	tr|A0A0D2X9Q2|A0A0D2X9Q2_FUSO4 Protein phosphatase OS=Fusarium oxysporum f. sp. lycopersici (strain 4287 / CBS 123668 / FGSC 9935 / NRRL 34936) OX=426428 GN=FOXG_00617 PE=3 SV=1	1	1	0.0184	42008.1	5.96
$1146-1	tr|A0A0D2X9T0|A0A0D2X9T0_FUSO4 2,4-dienoyl-CoA reductase (NADPH2) OS=Fusarium oxysporum f. sp. lycopersici (strain 4287 / CBS 123668 / FGSC 9935 / NRRL 34936) OX=426428 GN=FOXG_00645 PE=4 SV=1	1	1	0.0195	32183.5	8.58
$1147-1	tr|A0A0D2X9T1|A0A0D2X9T1_FUSO4 Acid phosphatase OS=Fusarium oxysporum f. sp. lycopersici (strain 4287 / CBS 123668 / FGSC 9935 / NRRL 34936) OX=426428 GN=FOXG_00646 PE=4 SV=1	1	1	0.0319	49878.1	5.03
$1148-1	tr|A0A0D2X9U7|A0A0D2X9U7_FUSO4 Uncharacterized protein OS=Fusarium oxysporum f. sp. lycopersici (strain 4287 / CBS 123668 / FGSC 9935 / NRRL 34936) OX=426428 GN=FOXG_00662 PE=4 SV=1	1	1	0.0545	18600.5	6.71
$1149-1	tr|A0A0D2X9Y4|A0A0D2X9Y4_FUSO4 Small nuclear ribonucleoprotein Sm D1 OS=Fusarium oxysporum f. sp. lycopersici (strain 4287 / CBS 123668 / FGSC 9935 / NRRL 34936) OX=426428 GN=FOXG_00699 PE=3 SV=1	1	1	0.1057	13325.4	11.3
$1149-2	tr|A0A0J9U6U0|A0A0J9U6U0_FUSO4 Small nuclear ribonucleoprotein Sm D1 OS=Fusarium oxysporum f. sp. lycopersici (strain 4287 / CBS 123668 / FGSC 9935 / NRRL 34936) OX=426428 GN=FOXG_00699 PE=3 SV=1	1	1	0.1121	12437.2	11.12
$1150-1	tr|A0A0D2X9Z0|A0A0D2X9Z0_FUSO4 Uncharacterized protein OS=Fusarium oxysporum f. sp. lycopersici (strain 4287 / CBS 123668 / FGSC 9935 / NRRL 34936) OX=426428 PE=4 SV=1	1	1	0.0336	17970.8	8.56
$1150-2	tr|A0A0J9U7T7|A0A0J9U7T7_FUSO4 Uncharacterized protein OS=Fusarium oxysporum f. sp. lycopersici (strain 4287 / CBS 123668 / FGSC 9935 / NRRL 34936) OX=426428 GN=FOXG_00705 PE=4 SV=1	1	1	0.0275	21770	6.63
$1150-3	tr|A0A0J9WT69|A0A0J9WT69_FUSO4 Uncharacterized protein OS=Fusarium oxysporum f. sp. lycopersici (strain 4287 / CBS 123668 / FGSC 9935 / NRRL 34936) OX=426428 GN=FOXG_21355 PE=4 SV=1	1	1	0.0178	32389.5	5.6
$1150-4	tr|A0A0J9VXL2|A0A0J9VXL2_FUSO4 Uncharacterized protein OS=Fusarium oxysporum f. sp. lycopersici (strain 4287 / CBS 123668 / FGSC 9935 / NRRL 34936) OX=426428 GN=FOXG_20952 PE=4 SV=1	1	1	0.0161	35734.1	5.56
$1150-5	tr|A0A0J9UPI9|A0A0J9UPI9_FUSO4 Uncharacterized protein OS=Fusarium oxysporum f. sp. lycopersici (strain 4287 / CBS 123668 / FGSC 9935 / NRRL 34936) OX=426428 GN=FOXG_03744 PE=4 SV=1	1	1	0.0076	71853.5	10.18
$1150-6	tr|A0A0D2XII9|A0A0D2XII9_FUSO4 Uncharacterized protein OS=Fusarium oxysporum f. sp. lycopersici (strain 4287 / CBS 123668 / FGSC 9935 / NRRL 34936) OX=426428 GN=FOXG_03744 PE=4 SV=1	1	1	0.007	78379.5	10.29
$1150-7	tr|A0A0J9WJD1|A0A0J9WJD1_FUSO4 C2H2-type domain-containing protein OS=Fusarium oxysporum f. sp. lycopersici (strain 4287 / CBS 123668 / FGSC 9935 / NRRL 34936) OX=426428 GN=FOXG_03744 PE=4 SV=1	1	1	0.0099	55243.5	11
$1150-8	tr|A0A0D2Y1L6|A0A0D2Y1L6_FUSO4 Uncharacterized protein OS=Fusarium oxysporum f. sp. lycopersici (strain 4287 / CBS 123668 / FGSC 9935 / NRRL 34936) OX=426428 GN=FOXG_10159 PE=4 SV=1	1	1	0.0062	87134.6	7.99
$1151-1	tr|A0A0D2X9Z1|A0A0D2X9Z1_FUSO4 Peroxiredoxin (Alkyl hydroperoxide reductase subunit C) OS=Fusarium oxysporum f. sp. lycopersici (strain 4287 / CBS 123668 / FGSC 9935 / NRRL 34936) OX=426428 GN=FOXG_00706 PE=3 SV=1	1	1	0.0435	19988.6	8.65
$1152-1	tr|A0A0D2X9Z3|A0A0D2X9Z3_FUSO4 Uncharacterized protein OS=Fusarium oxysporum f. sp. lycopersici (strain 4287 / CBS 123668 / FGSC 9935 / NRRL 34936) OX=426428 PE=4 SV=1	1	1	0.0187	66438.3	9.24
$1152-2	tr|A0A0J9U6V7|A0A0J9U6V7_FUSO4 Uncharacterized protein OS=Fusarium oxysporum f. sp. lycopersici (strain 4287 / CBS 123668 / FGSC 9935 / NRRL 34936) OX=426428 GN=FOXG_00708 PE=4 SV=1	1	1	0.0197	63384.2	9.7
$1152-3	tr|A0A0J9U7V1|A0A0J9U7V1_FUSO4 Uncharacterized protein OS=Fusarium oxysporum f. sp. lycopersici (strain 4287 / CBS 123668 / FGSC 9935 / NRRL 34936) OX=426428 GN=FOXG_00708 PE=4 SV=1	1	1	0.0142	87153.9	6.95
$1153-1	tr|A0A0D2XA39|A0A0D2XA39_FUSO4 Glyco_hydro_cc domain-containing protein OS=Fusarium oxysporum f. sp. lycopersici (strain 4287 / CBS 123668 / FGSC 9935 / NRRL 34936) OX=426428 GN=FOXG_00754 PE=4 SV=1	1	1	0.0387	41341.6	5.95
$1154-1	tr|A0A0D2XA44|A0A0D2XA44_FUSO4 Uncharacterized protein OS=Fusarium oxysporum f. sp. lycopersici (strain 4287 / CBS 123668 / FGSC 9935 / NRRL 34936) OX=426428 GN=FOXG_00759 PE=3 SV=1	1	1	0.0106	86257.9	5.27
$1154-2	tr|A0A0J9UA64|A0A0J9UA64_FUSO4 Uncharacterized protein OS=Fusarium oxysporum f. sp. lycopersici (strain 4287 / CBS 123668 / FGSC 9935 / NRRL 34936) OX=426428 GN=FOXG_00759 PE=3 SV=1	1	1	0.0106	86226.9	5.39
$1155-1	tr|A0A0D2XA45|A0A0D2XA45_FUSO4 Uncharacterized protein OS=Fusarium oxysporum f. sp. lycopersici (strain 4287 / CBS 123668 / FGSC 9935 / NRRL 34936) OX=426428 GN=FOXG_00760 PE=3 SV=1	1	1	0.026	37333.7	9.71
$1156-1	tr|A0A0D2XA61|A0A0D2XA61_FUSO4 TBP-associated factor 4 OS=Fusarium oxysporum f. sp. lycopersici (strain 4287 / CBS 123668 / FGSC 9935 / NRRL 34936) OX=426428 GN=FOXG_00776 PE=3 SV=1	1	1	0.011	68552.9	9.23
$1157-1	tr|A0A0D2XA69|A0A0D2XA69_FUSO4 Uncharacterized protein OS=Fusarium oxysporum f. sp. lycopersici (strain 4287 / CBS 123668 / FGSC 9935 / NRRL 34936) OX=426428 GN=FOXG_00784 PE=3 SV=1	1	1	0.0248	32049.2	5.62
$1158-1	tr|A0A0D2XA78|A0A0D2XA78_FUSO4 Mitochondrial escape protein 2 OS=Fusarium oxysporum f. sp. lycopersici (strain 4287 / CBS 123668 / FGSC 9935 / NRRL 34936) OX=426428 PE=3 SV=1	1	1	0.0168	66621.4	8.75
$1158-2	tr|A0A0J9UAB0|A0A0J9UAB0_FUSO4 Mitochondrial escape protein 2 OS=Fusarium oxysporum f. sp. lycopersici (strain 4287 / CBS 123668 / FGSC 9935 / NRRL 34936) OX=426428 GN=FOXG_00793 PE=3 SV=1	1	1	0.0115	97213.3	8.8
$1159-1	tr|A0A0D2XA96|A0A0D2XA96_FUSO4 Serine/threonine-protein phosphatase OS=Fusarium oxysporum f. sp. lycopersici (strain 4287 / CBS 123668 / FGSC 9935 / NRRL 34936) OX=426428 GN=FOXG_00811 PE=3 SV=1	1	1	0.0282	58054.6	5.8
$1160-1	tr|A0A0D2XAA1|A0A0D2XAA1_FUSO4 Uncharacterized protein OS=Fusarium oxysporum f. sp. lycopersici (strain 4287 / CBS 123668 / FGSC 9935 / NRRL 34936) OX=426428 GN=FOXG_00816 PE=4 SV=1	1	1	0.0046	167325	5.67
$1160-2	tr|A0A0J9U7C8|A0A0J9U7C8_FUSO4 PAC domain-containing protein OS=Fusarium oxysporum f. sp. lycopersici (strain 4287 / CBS 123668 / FGSC 9935 / NRRL 34936) OX=426428 GN=FOXG_00816 PE=4 SV=1	1	1	0.0063	122222	5.62
$1161-1	tr|A0A0D2XAC1|A0A0D2XAC1_FUSO4 Uncharacterized protein OS=Fusarium oxysporum f. sp. lycopersici (strain 4287 / CBS 123668 / FGSC 9935 / NRRL 34936) OX=426428 PE=3 SV=1	1	1	0.013	50041.5	8.49
$1161-2	tr|A0A0J9U802|A0A0J9U802_FUSO4 Uncharacterized protein OS=Fusarium oxysporum f. sp. lycopersici (strain 4287 / CBS 123668 / FGSC 9935 / NRRL 34936) OX=426428 GN=FOXG_00836 PE=3 SV=1	1	1	0.013	50266.8	8.35
$1162-1	tr|A0A0D2XAC8|A0A0D2XAC8_FUSO4 Uncharacterized protein OS=Fusarium oxysporum f. sp. lycopersici (strain 4287 / CBS 123668 / FGSC 9935 / NRRL 34936) OX=426428 PE=4 SV=1	1	1	0.0231	66961.7	9.63
$1162-2	tr|A0A0J9U810|A0A0J9U810_FUSO4 Uncharacterized protein OS=Fusarium oxysporum f. sp. lycopersici (strain 4287 / CBS 123668 / FGSC 9935 / NRRL 34936) OX=426428 GN=FOXG_00843 PE=4 SV=1	1	1	0.0222	69726.8	9.52
$1163-1	tr|A0A0D2XAC9|A0A0D2XAC9_FUSO4 Phosphatidylinositol glycan, class P OS=Fusarium oxysporum f. sp. lycopersici (strain 4287 / CBS 123668 / FGSC 9935 / NRRL 34936) OX=426428 GN=FOXG_00844 PE=4 SV=1	1	1	0.029	26735.8	4.41
$1164-1	tr|A0A0D2XAD5|A0A0D2XAD5_FUSO4 TEA domain-containing protein OS=Fusarium oxysporum f. sp. lycopersici (strain 4287 / CBS 123668 / FGSC 9935 / NRRL 34936) OX=426428 GN=FOXG_00850 PE=3 SV=1	1	1	0.0077	87838.1	6.35
$1164-2	tr|D2KZY6|D2KZY6_FUSOX FoabaA protein OS=Fusarium oxysporum f. sp. lycopersici OX=59765 GN=FoabaA PE=4 SV=1	1	1	0.0074	90955.3	6.26
$1165-1	tr|A0A0D2XAD9|A0A0D2XAD9_FUSO4 Uncharacterized protein OS=Fusarium oxysporum f. sp. lycopersici (strain 4287 / CBS 123668 / FGSC 9935 / NRRL 34936) OX=426428 GN=FOXG_00854 PE=4 SV=1	1	1	0.0708	35530.6	6.06
$1166-1	tr|A0A0D2XAF1|A0A0D2XAF1_FUSO4 FAD-binding PCMH-type domain-containing protein OS=Fusarium oxysporum f. sp. lycopersici (strain 4287 / CBS 123668 / FGSC 9935 / NRRL 34936) OX=426428 GN=FOXG_00866 PE=3 SV=1	1	1	0.0166	52053.4	5.2
$1167-1	tr|A0A0D2XAF9|A0A0D2XAF9_FUSO4 DUF1708 domain-containing protein OS=Fusarium oxysporum f. sp. lycopersici (strain 4287 / CBS 123668 / FGSC 9935 / NRRL 34936) OX=426428 GN=FOXG_00874 PE=4 SV=1	1	1	0.0105	115352	5.96
$1168-1	tr|A0A0D2XAG8|A0A0D2XAG8_FUSO4 Uncharacterized protein OS=Fusarium oxysporum f. sp. lycopersici (strain 4287 / CBS 123668 / FGSC 9935 / NRRL 34936) OX=426428 GN=FOXG_00883 PE=3 SV=1	1	1	0.0074	90009.6	5.65
$1169-1	tr|A0A0D2XAH2|A0A0D2XAH2_FUSO4 Uncharacterized protein OS=Fusarium oxysporum f. sp. lycopersici (strain 4287 / CBS 123668 / FGSC 9935 / NRRL 34936) OX=426428 GN=FOXG_00888 PE=4 SV=1	1	1	0.0235	28629	8.91
$1170-1	tr|A0A0D2XAJ3|A0A0D2XAJ3_FUSO4 JmjC domain-containing protein OS=Fusarium oxysporum f. sp. lycopersici (strain 4287 / CBS 123668 / FGSC 9935 / NRRL 34936) OX=426428 GN=FOXG_00909 PE=4 SV=1	1	1	0.0146	53508.5	5.24
$1171-1	tr|A0A0D2XAJ5|A0A0D2XAJ5_FUSO4 Uncharacterized protein OS=Fusarium oxysporum f. sp. lycopersici (strain 4287 / CBS 123668 / FGSC 9935 / NRRL 34936) OX=426428 PE=4 SV=1	1	1	0.0195	35963.4	8.46
$1172-1	tr|A0A0D2XAJ9|A0A0D2XAJ9_FUSO4 J domain-containing protein OS=Fusarium oxysporum f. sp. lycopersici (strain 4287 / CBS 123668 / FGSC 9935 / NRRL 34936) OX=426428 GN=FOXG_00915 PE=4 SV=1	1	1	0.0086	89556.3	6.03
$1173-1	tr|A0A0D2XAK8|A0A0D2XAK8_FUSO4 Uncharacterized protein OS=Fusarium oxysporum f. sp. lycopersici (strain 4287 / CBS 123668 / FGSC 9935 / NRRL 34936) OX=426428 GN=FOXG_00924 PE=4 SV=1	1	1	0.0323	54088.9	6.11
$1174-1	tr|A0A0D2XAL8|A0A0D2XAL8_FUSO4 Uncharacterized protein OS=Fusarium oxysporum f. sp. lycopersici (strain 4287 / CBS 123668 / FGSC 9935 / NRRL 34936) OX=426428 GN=FOXG_00934 PE=4 SV=1	1	1	0.0078	111266	10.04
$1175-1	tr|A0A0D2XAM0|A0A0D2XAM0_FUSO4 Uncharacterized protein OS=Fusarium oxysporum f. sp. lycopersici (strain 4287 / CBS 123668 / FGSC 9935 / NRRL 34936) OX=426428 PE=4 SV=1	1	1	0.0095	94956.2	5.25
$1175-2	tr|A0A0J9WGM9|A0A0J9WGM9_FUSO4 Uncharacterized protein OS=Fusarium oxysporum f. sp. lycopersici (strain 4287 / CBS 123668 / FGSC 9935 / NRRL 34936) OX=426428 GN=FOXG_00936 PE=4 SV=1	1	1	0.0089	100729	5.44
$1176-1	tr|A0A0D2XAN0|A0A0D2XAN0_FUSO4 Enoyl reductase OS=Fusarium oxysporum f. sp. lycopersici (strain 4287 / CBS 123668 / FGSC 9935 / NRRL 34936) OX=426428 GN=FOXG_00946 PE=3 SV=1	1	1	0.0195	34988.4	9.57
$1177-1	tr|A0A0D2XAN4|A0A0D2XAN4_FUSO4 HECT-type E3 ubiquitin transferase OS=Fusarium oxysporum f. sp. lycopersici (strain 4287 / CBS 123668 / FGSC 9935 / NRRL 34936) OX=426428 GN=FOXG_00950 PE=4 SV=1	1	1	0.002	445550	4.93
$1178-1	tr|A0A0D2XAR6|A0A0D2XAR6_FUSO4 HIG1 domain-containing protein OS=Fusarium oxysporum f. sp. lycopersici (strain 4287 / CBS 123668 / FGSC 9935 / NRRL 34936) OX=426428 GN=FOXG_00982 PE=3 SV=1	1	1	0.0346	26162.7	9.15
$1179-1	tr|A0A0D2XAS9|A0A0D2XAS9_FUSO4 Autophagy-related protein 6 OS=Fusarium oxysporum f. sp. lycopersici (strain 4287 / CBS 123668 / FGSC 9935 / NRRL 34936) OX=426428 GN=FOXG_00995 PE=3 SV=1	1	1	0.0144	54256.5	6.23
$1180-1	tr|A0A0D2XAT3|A0A0D2XAT3_FUSO4 Uncharacterized protein OS=Fusarium oxysporum f. sp. lycopersici (strain 4287 / CBS 123668 / FGSC 9935 / NRRL 34936) OX=426428 GN=FOXG_00999 PE=4 SV=1	1	1	0.015	52170.2	7.19
$1181-1	tr|A0A0D2XAV5|A0A0D2XAV5_FUSO4 Kinesin family member 11 OS=Fusarium oxysporum f. sp. lycopersici (strain 4287 / CBS 123668 / FGSC 9935 / NRRL 34936) OX=426428 GN=FOXG_01021 PE=3 SV=1	1	1	0.0077	129696	5.93
$1182-1	tr|A0A0D2XAX0|A0A0D2XAX0_FUSO4 Uncharacterized protein OS=Fusarium oxysporum f. sp. lycopersici (strain 4287 / CBS 123668 / FGSC 9935 / NRRL 34936) OX=426428 GN=FOXG_01036 PE=4 SV=1	1	1	0.0478	26435.2	5
$1183-1	tr|A0A0D2XAX8|A0A0D2XAX8_FUSO4 Uncharacterized protein OS=Fusarium oxysporum f. sp. lycopersici (strain 4287 / CBS 123668 / FGSC 9935 / NRRL 34936) OX=426428 GN=FOXG_01044 PE=4 SV=1	1	1	0.0186	48472.6	5.3
$1183-2	tr|A0A0J9U938|A0A0J9U938_FUSO4 Uncharacterized protein OS=Fusarium oxysporum f. sp. lycopersici (strain 4287 / CBS 123668 / FGSC 9935 / NRRL 34936) OX=426428 GN=FOXG_01044 PE=4 SV=1	1	1	0.0214	41994.4	5.53
$1184-1	tr|A0A0D2XAY6|A0A0D2XAY6_FUSO4 Adenine phosphoribosyltransferase OS=Fusarium oxysporum f. sp. lycopersici (strain 4287 / CBS 123668 / FGSC 9935 / NRRL 34936) OX=426428 GN=FOXG_01052 PE=3 SV=1	1	1	0.045	23225.2	4.88
$1185-1	tr|A0A0D2XAZ4|A0A0D2XAZ4_FUSO4 HMG box domain-containing protein OS=Fusarium oxysporum f. sp. lycopersici (strain 4287 / CBS 123668 / FGSC 9935 / NRRL 34936) OX=426428 GN=FOXG_01060 PE=4 SV=1	1	1	0.0367	39044.8	9.28
$1186-1	tr|A0A0D2XB07|A0A0D2XB07_FUSO4 Succinate dehydrogenase [ubiquinone] cytochrome b small subunit OS=Fusarium oxysporum f. sp. lycopersici (strain 4287 / CBS 123668 / FGSC 9935 / NRRL 34936) OX=426428 GN=FOXG_01074 PE=3 SV=1	1	1	0.033	19723.7	10.1
$1187-1	tr|A0A0D2XB10|A0A0D2XB10_FUSO4 Uncharacterized protein OS=Fusarium oxysporum f. sp. lycopersici (strain 4287 / CBS 123668 / FGSC 9935 / NRRL 34936) OX=426428 GN=FOXG_01077 PE=4 SV=1	1	1	0.0134	46865.5	4.78
$1188-1	tr|A0A0D2XB16|A0A0D2XB16_FUSO4 Uncharacterized protein OS=Fusarium oxysporum f. sp. lycopersici (strain 4287 / CBS 123668 / FGSC 9935 / NRRL 34936) OX=426428 GN=FOXG_01083 PE=4 SV=1	1	1	0.0147	75554.3	5.34
$1188-2	tr|A0A0J9WGT0|A0A0J9WGT0_FUSO4 Uncharacterized protein OS=Fusarium oxysporum f. sp. lycopersici (strain 4287 / CBS 123668 / FGSC 9935 / NRRL 34936) OX=426428 GN=FOXG_01083 PE=4 SV=1	1	1	0.0168	66130.1	5.25
$1189-1	tr|A0A0D2XB34|A0A0D2XB34_FUSO4 Beta-glucosidase OS=Fusarium oxysporum f. sp. lycopersici (strain 4287 / CBS 123668 / FGSC 9935 / NRRL 34936) OX=426428 GN=FOXG_01101 PE=3 SV=1	1	1	0.006	90818.7	5.43
$1190-1	tr|A0A0D2XB44|A0A0D2XB44_FUSO4 Peptidyl-prolyl cis-trans isomerase OS=Fusarium oxysporum f. sp. lycopersici (strain 4287 / CBS 123668 / FGSC 9935 / NRRL 34936) OX=426428 PE=3 SV=1	1	1	0.0333	19728.8	7.84
$1190-2	tr|A0A0J9WGT9|A0A0J9WGT9_FUSO4 Peptidyl-prolyl cis-trans isomerase OS=Fusarium oxysporum f. sp. lycopersici (strain 4287 / CBS 123668 / FGSC 9935 / NRRL 34936) OX=426428 GN=FOXG_01111 PE=3 SV=1	1	1	0.0268	24564.4	9.54
$1191-1	tr|A0A0D2XB88|A0A0D2XB88_FUSO4 Peptide-methionine (S)-S-oxide reductase OS=Fusarium oxysporum f. sp. lycopersici (strain 4287 / CBS 123668 / FGSC 9935 / NRRL 34936) OX=426428 GN=FOXG_01156 PE=3 SV=1	1	1	0.0488	23148.7	6.71
$1192-1	tr|A0A0D2XB89|A0A0D2XB89_FUSO4 Uncharacterized protein OS=Fusarium oxysporum f. sp. lycopersici (strain 4287 / CBS 123668 / FGSC 9935 / NRRL 34936) OX=426428 GN=FOXG_01157 PE=3 SV=1	1	1	0.0232	37211.8	10.91
$1193-1	tr|A0A0D2XB90|A0A0D2XB90_FUSO4 Uncharacterized protein OS=Fusarium oxysporum f. sp. lycopersici (strain 4287 / CBS 123668 / FGSC 9935 / NRRL 34936) OX=426428 GN=FOXG_01158 PE=4 SV=1	1	1	0.0131	109275	9.28
$1194-1	tr|A0A0D2XB94|A0A0D2XB94_FUSO4 Uncharacterized protein OS=Fusarium oxysporum f. sp. lycopersici (strain 4287 / CBS 123668 / FGSC 9935 / NRRL 34936) OX=426428 PE=4 SV=1	1	1	0.0377	18038.2	9.62
$1194-2	tr|A0A0J9U9R9|A0A0J9U9R9_FUSO4 Uncharacterized protein OS=Fusarium oxysporum f. sp. lycopersici (strain 4287 / CBS 123668 / FGSC 9935 / NRRL 34936) OX=426428 GN=FOXG_01162 PE=4 SV=1	1	1	0.0291	23688.8	10.16
$1195-1	tr|A0A0D2XBA4|A0A0D2XBA4_FUSO4 Translation initiation factor 4E OS=Fusarium oxysporum f. sp. lycopersici (strain 4287 / CBS 123668 / FGSC 9935 / NRRL 34936) OX=426428 GN=FOXG_01172 PE=3 SV=1	1	1	0.0352	28640.8	5.45
$1196-1	tr|A0A0D2XBB8|A0A0D2XBB8_FUSO4 PKS_ER domain-containing protein OS=Fusarium oxysporum f. sp. lycopersici (strain 4287 / CBS 123668 / FGSC 9935 / NRRL 34936) OX=426428 PE=4 SV=1	1	1	0.0201	31926.3	8.64
$1196-2	tr|A0A0J9U947|A0A0J9U947_FUSO4 PKS_ER domain-containing protein OS=Fusarium oxysporum f. sp. lycopersici (strain 4287 / CBS 123668 / FGSC 9935 / NRRL 34936) OX=426428 GN=FOXG_01187 PE=4 SV=1	1	1	0.0273	23425.7	9.12
$1197-1	tr|A0A0D2XBC0|A0A0D2XBC0_FUSO4 Protein PNG1 OS=Fusarium oxysporum f. sp. lycopersici (strain 4287 / CBS 123668 / FGSC 9935 / NRRL 34936) OX=426428 GN=FOXG_01189 PE=3 SV=1	1	1	0.02	51091.7	8.43
$1198-1	tr|A0A0D2XBC8|A0A0D2XBC8_FUSO4 Uncharacterized protein OS=Fusarium oxysporum f. sp. lycopersici (strain 4287 / CBS 123668 / FGSC 9935 / NRRL 34936) OX=426428 GN=FOXG_01197 PE=4 SV=1	1	1	0.0885	13202.7	9.84
$1199-1	tr|A0A0D2XBE3|A0A0D2XBE3_FUSO4 Uncharacterized protein OS=Fusarium oxysporum f. sp. lycopersici (strain 4287 / CBS 123668 / FGSC 9935 / NRRL 34936) OX=426428 GN=FOXG_01213 PE=4 SV=1	1	1	0.01	80300.1	5.15
$1200-1	tr|A0A0D2XBJ7|A0A0D2XBJ7_FUSO4 Conidiation-specific protein 10 OS=Fusarium oxysporum f. sp. lycopersici (strain 4287 / CBS 123668 / FGSC 9935 / NRRL 34936) OX=426428 GN=FOXG_01269 PE=4 SV=1	1	1	0.0779	7816.33	6.57
$1201-1	tr|A0A0D2XBL5|A0A0D2XBL5_FUSO4 NADH dehydrogenase OS=Fusarium oxysporum f. sp. lycopersici (strain 4287 / CBS 123668 / FGSC 9935 / NRRL 34936) OX=426428 GN=FOXG_01287 PE=4 SV=1	1	1	0.1579	8461.79	8.93
$1202-1	tr|A0A0D2XBM2|A0A0D2XBM2_FUSO4 Nudix hydrolase domain-containing protein OS=Fusarium oxysporum f. sp. lycopersici (strain 4287 / CBS 123668 / FGSC 9935 / NRRL 34936) OX=426428 PE=3 SV=1	1	1	0.0376	20665.5	4.53
$1202-2	tr|A0A0J9UAN4|A0A0J9UAN4_FUSO4 ADP-ribose pyrophosphatase OS=Fusarium oxysporum f. sp. lycopersici (strain 4287 / CBS 123668 / FGSC 9935 / NRRL 34936) OX=426428 GN=FOXG_01294 PE=3 SV=1	1	1	0.0343	22770.8	4.64
$1203-1	tr|A0A0D2XBN8|A0A0D2XBN8_FUSO4 GTP-binding protein RHO3 OS=Fusarium oxysporum f. sp. lycopersici (strain 4287 / CBS 123668 / FGSC 9935 / NRRL 34936) OX=426428 GN=FOXG_01310 PE=4 SV=1	1	1	0.064	22800.5	4.73
$1204-1	tr|A0A0D2XBP1|A0A0D2XBP1_FUSO4 Beta-glucosidase OS=Fusarium oxysporum f. sp. lycopersici (strain 4287 / CBS 123668 / FGSC 9935 / NRRL 34936) OX=426428 PE=3 SV=1	1	1	0.0086	88491.9	5.84
$1204-2	tr|A0A0J9UAQ3|A0A0J9UAQ3_FUSO4 Beta-glucosidase OS=Fusarium oxysporum f. sp. lycopersici (strain 4287 / CBS 123668 / FGSC 9935 / NRRL 34936) OX=426428 GN=FOXG_01313 PE=3 SV=1	1	1	0.0074	103077	5.99
$1205-1	tr|A0A0D2XBZ4|A0A0D2XBZ4_FUSO4 Transcription elongation factor 1 homolog OS=Fusarium oxysporum f. sp. lycopersici (strain 4287 / CBS 123668 / FGSC 9935 / NRRL 34936) OX=426428 GN=FOXG_01417 PE=3 SV=1	1	1	0.084	12826	5.12
$1206-1	tr|A0A0D2XC01|A0A0D2XC01_FUSO4 Uncharacterized protein OS=Fusarium oxysporum f. sp. lycopersici (strain 4287 / CBS 123668 / FGSC 9935 / NRRL 34936) OX=426428 GN=FOXG_01424 PE=3 SV=1	1	1	0.0095	180537	6.28
$1207-1	tr|A0A0D2XC03|A0A0D2XC03_FUSO4 Nucleosome assembly protein 1-like 1 OS=Fusarium oxysporum f. sp. lycopersici (strain 4287 / CBS 123668 / FGSC 9935 / NRRL 34936) OX=426428 GN=FOXG_01426 PE=3 SV=1	1	1	0.0198	45470.2	4.36
$1207-2	tr|A0A0J9WH36|A0A0J9WH36_FUSO4 Nucleosome assembly protein 1-like 1 OS=Fusarium oxysporum f. sp. lycopersici (strain 4287 / CBS 123668 / FGSC 9935 / NRRL 34936) OX=426428 GN=FOXG_01426 PE=3 SV=1	1	1	0.0202	44694.3	4.32
$1208-1	tr|A0A0D2XC22|A0A0D2XC22_FUSO4 Uncharacterized protein OS=Fusarium oxysporum f. sp. lycopersici (strain 4287 / CBS 123668 / FGSC 9935 / NRRL 34936) OX=426428 GN=FOXG_01445 PE=4 SV=1	1	1	0.0385	23438.5	5.51
$1209-1	tr|A0A0D2XC26|A0A0D2XC26_FUSO4 Uncharacterized protein OS=Fusarium oxysporum f. sp. lycopersici (strain 4287 / CBS 123668 / FGSC 9935 / NRRL 34936) OX=426428 GN=FOXG_01449 PE=4 SV=1	1	1	0.0621	18820.6	4.84
$1210-1	tr|A0A0D2XC33|A0A0D2XC33_FUSO4 Tyrosine--tRNA ligase OS=Fusarium oxysporum f. sp. lycopersici (strain 4287 / CBS 123668 / FGSC 9935 / NRRL 34936) OX=426428 GN=FOXG_01456 PE=3 SV=1	1	1	0.0252	43938.9	6
$1211-1	tr|A0A0D2XC36|A0A0D2XC36_FUSO4 Uncharacterized protein OS=Fusarium oxysporum f. sp. lycopersici (strain 4287 / CBS 123668 / FGSC 9935 / NRRL 34936) OX=426428 GN=FOXG_01459 PE=4 SV=1	1	1	0.0072	93747.2	5.89
$1212-1	tr|A0A0D2XC66|A0A0D2XC66_FUSO4 Calcineurin regulatory subunit OS=Fusarium oxysporum f. sp. lycopersici (strain 4287 / CBS 123668 / FGSC 9935 / NRRL 34936) OX=426428 GN=FOXG_01489 PE=3 SV=1	1	1	0.0575	19684	4.44
$1213-1	tr|A0A0D2XCA6|A0A0D2XCA6_FUSO4 Uncharacterized protein OS=Fusarium oxysporum f. sp. lycopersici (strain 4287 / CBS 123668 / FGSC 9935 / NRRL 34936) OX=426428 PE=3 SV=1	1	1	0.0226	36138.5	4.3
$1213-2	tr|A0A0J9UB78|A0A0J9UB78_FUSO4 Uncharacterized protein OS=Fusarium oxysporum f. sp. lycopersici (strain 4287 / CBS 123668 / FGSC 9935 / NRRL 34936) OX=426428 GN=FOXG_01529 PE=3 SV=1	1	1	0.0218	37498.2	4.37
$1213-3	tr|A0A0J9UAF8|A0A0J9UAF8_FUSO4 Uncharacterized protein OS=Fusarium oxysporum f. sp. lycopersici (strain 4287 / CBS 123668 / FGSC 9935 / NRRL 34936) OX=426428 GN=FOXG_01529 PE=3 SV=1	1	1	0.0217	37725.5	4.41
$1214-1	tr|A0A0D2XCB8|A0A0D2XCB8_FUSO4 rRNA-processing protein OS=Fusarium oxysporum f. sp. lycopersici (strain 4287 / CBS 123668 / FGSC 9935 / NRRL 34936) OX=426428 GN=FOXG_01541 PE=3 SV=1	1	1	0.0924	14107.3	10.24
$1215-1	tr|A0A0D2XCC3|A0A0D2XCC3_FUSO4 J domain-containing protein OS=Fusarium oxysporum f. sp. lycopersici (strain 4287 / CBS 123668 / FGSC 9935 / NRRL 34936) OX=426428 GN=FOXG_01546 PE=4 SV=1	1	1	0.051	45096.6	9.39
$1216-1	tr|A0A0D2XCD2|A0A0D2XCD2_FUSO4 Elongation of fatty acids protein OS=Fusarium oxysporum f. sp. lycopersici (strain 4287 / CBS 123668 / FGSC 9935 / NRRL 34936) OX=426428 GN=FOXG_01555 PE=3 SV=1	1	1	0.0351	39020.1	9.53
$1217-1	tr|A0A0D2XCE7|A0A0D2XCE7_FUSO4 Hsp70-like protein OS=Fusarium oxysporum f. sp. lycopersici (strain 4287 / CBS 123668 / FGSC 9935 / NRRL 34936) OX=426428 GN=FOXG_01570 PE=3 SV=1	1	1	0.0282	23697.4	4.53
$1218-1	tr|A0A0D2XCF3|A0A0D2XCF3_FUSO4 Uncharacterized protein OS=Fusarium oxysporum f. sp. lycopersici (strain 4287 / CBS 123668 / FGSC 9935 / NRRL 34936) OX=426428 GN=FOXG_01576 PE=4 SV=1	1	1	0.01	89962.5	5.22
$1219-1	tr|A0A0D2XCF5|A0A0D2XCF5_FUSO4 TruB_N domain-containing protein OS=Fusarium oxysporum f. sp. lycopersici (strain 4287 / CBS 123668 / FGSC 9935 / NRRL 34936) OX=426428 PE=3 SV=1	1	1	0.0163	55109.4	9.06
$1219-2	tr|A0A0J9UBF8|A0A0J9UBF8_FUSO4 tRNA pseudouridine55 synthase OS=Fusarium oxysporum f. sp. lycopersici (strain 4287 / CBS 123668 / FGSC 9935 / NRRL 34936) OX=426428 GN=FOXG_01578 PE=3 SV=1	1	1	0.016	56233.8	9.25
$1220-1	tr|A0A0D2XCI5|A0A0D2XCI5_FUSO4 CP-type G domain-containing protein OS=Fusarium oxysporum f. sp. lycopersici (strain 4287 / CBS 123668 / FGSC 9935 / NRRL 34936) OX=426428 GN=FOXG_01608 PE=4 SV=1	1	1	0.0179	74381.6	5.88
$1221-1	tr|A0A0D2XCK1|A0A0D2XCK1_FUSO4 RHOMBOID-like protein OS=Fusarium oxysporum f. sp. lycopersici (strain 4287 / CBS 123668 / FGSC 9935 / NRRL 34936) OX=426428 PE=3 SV=1	1	1	0.0194	62322.4	7.24
$1221-2	tr|A0A0J9UE93|A0A0J9UE93_FUSO4 RHOMBOID-like protein OS=Fusarium oxysporum f. sp. lycopersici (strain 4287 / CBS 123668 / FGSC 9935 / NRRL 34936) OX=426428 GN=FOXG_01624 PE=3 SV=1	1	1	0.0192	62706.9	7.24
$1221-3	tr|A0A0J9UBL4|A0A0J9UBL4_FUSO4 RHOMBOID-like protein OS=Fusarium oxysporum f. sp. lycopersici (strain 4287 / CBS 123668 / FGSC 9935 / NRRL 34936) OX=426428 GN=FOXG_01624 PE=3 SV=1	1	1	0.0204	59186.3	8.41
$1222-1	tr|A0A0D2XCN3|A0A0D2XCN3_FUSO4 Uncharacterized protein OS=Fusarium oxysporum f. sp. lycopersici (strain 4287 / CBS 123668 / FGSC 9935 / NRRL 34936) OX=426428 GN=FOXG_01656 PE=4 SV=1	1	1	0.0696	16554	9.72
$1223-1	tr|A0A0D2XCN5|A0A0D2XCN5_FUSO4 Uncharacterized protein OS=Fusarium oxysporum f. sp. lycopersici (strain 4287 / CBS 123668 / FGSC 9935 / NRRL 34936) OX=426428 GN=FOXG_01658 PE=4 SV=1	1	1	0.0059	149571	8.56
$1224-1	tr|A0A0D2XCN6|A0A0D2XCN6_FUSO4 Importin subunit alpha OS=Fusarium oxysporum f. sp. lycopersici (strain 4287 / CBS 123668 / FGSC 9935 / NRRL 34936) OX=426428 GN=FOXG_01659 PE=3 SV=1	1	1	0.0217	60241.6	5.02
$1225-1	tr|A0A0D2XCQ9|A0A0D2XCQ9_FUSO4 Uncharacterized protein OS=Fusarium oxysporum f. sp. lycopersici (strain 4287 / CBS 123668 / FGSC 9935 / NRRL 34936) OX=426428 PE=4 SV=1	1	1	0.0045	153898	6.18
$1225-2	tr|A0A0J9WHC4|A0A0J9WHC4_FUSO4 Uncharacterized protein OS=Fusarium oxysporum f. sp. lycopersici (strain 4287 / CBS 123668 / FGSC 9935 / NRRL 34936) OX=426428 GN=FOXG_01682 PE=4 SV=1	1	1	0.0044	155236	6.15
$1226-1	tr|A0A0D2XCR5|A0A0D2XCR5_FUSO4 Phosphomannomutase OS=Fusarium oxysporum f. sp. lycopersici (strain 4287 / CBS 123668 / FGSC 9935 / NRRL 34936) OX=426428 GN=FOXG_01689 PE=3 SV=1	1	1	0.0221	30318.9	5.08
$1227-1	tr|A0A0D2XCT0|A0A0D2XCT0_FUSO4 SLD3 domain-containing protein OS=Fusarium oxysporum f. sp. lycopersici (strain 4287 / CBS 123668 / FGSC 9935 / NRRL 34936) OX=426428 PE=4 SV=1	1	1	0.0087	88767.2	9.53
$1227-2	tr|A0A0J9UB71|A0A0J9UB71_FUSO4 SLD3 domain-containing protein OS=Fusarium oxysporum f. sp. lycopersici (strain 4287 / CBS 123668 / FGSC 9935 / NRRL 34936) OX=426428 GN=FOXG_01705 PE=4 SV=1	1	1	0.0084	91979	9.52
$1228-1	tr|A0A0D2XCT8|A0A0D2XCT8_FUSO4 Dolichyl-diphosphooligosaccharide--protein glycosyltransferase subunit OST2 OS=Fusarium oxysporum f. sp. lycopersici (strain 4287 / CBS 123668 / FGSC 9935 / NRRL 34936) OX=426428 GN=FOXG_01713 PE=3 SV=1	1	1	0.0633	17207.7	8.75
$1229-1	tr|A0A0D2XCU6|A0A0D2XCU6_FUSO4 Dopey_N domain-containing protein OS=Fusarium oxysporum f. sp. lycopersici (strain 4287 / CBS 123668 / FGSC 9935 / NRRL 34936) OX=426428 PE=3 SV=1	1	1	0.0056	195883	5.29
$1229-2	tr|A0A0J9UET9|A0A0J9UET9_FUSO4 Dopey_N domain-containing protein OS=Fusarium oxysporum f. sp. lycopersici (strain 4287 / CBS 123668 / FGSC 9935 / NRRL 34936) OX=426428 GN=FOXG_01721 PE=3 SV=1	1	1	0.0054	207055	5.33
$1230-1	tr|A0A0D2XCU8|A0A0D2XCU8_FUSO4 Uncharacterized protein OS=Fusarium oxysporum f. sp. lycopersici (strain 4287 / CBS 123668 / FGSC 9935 / NRRL 34936) OX=426428 GN=FOXG_01723 PE=4 SV=1	1	1	0.0495	20195.8	6.84
$1231-1	tr|A0A0D2XCX6|A0A0D2XCX6_FUSO4 Utp12 domain-containing protein OS=Fusarium oxysporum f. sp. lycopersici (strain 4287 / CBS 123668 / FGSC 9935 / NRRL 34936) OX=426428 GN=FOXG_01751 PE=4 SV=1	1	1	0.0094	107183	5.96
$1232-1	tr|A0A0D2XCY2|A0A0D2XCY2_FUSO4 SF3b1 domain-containing protein OS=Fusarium oxysporum f. sp. lycopersici (strain 4287 / CBS 123668 / FGSC 9935 / NRRL 34936) OX=426428 GN=FOXG_01757 PE=3 SV=1	1	1	0.0091	134424	5.54
$1233-1	tr|A0A0D2XCY7|A0A0D2XCY7_FUSO4 Fanconi-associated nuclease OS=Fusarium oxysporum f. sp. lycopersici (strain 4287 / CBS 123668 / FGSC 9935 / NRRL 34936) OX=426428 GN=FOXG_01762 PE=3 SV=1	1	1	0.0141	98098.9	6.25
$1234-1	tr|A0A0D2XCZ5|A0A0D2XCZ5_FUSO4 Nucleolar protein 9 OS=Fusarium oxysporum f. sp. lycopersici (strain 4287 / CBS 123668 / FGSC 9935 / NRRL 34936) OX=426428 GN=FOXG_01770 PE=4 SV=1	1	1	0.0131	85453.2	6.42
$1235-1	tr|A0A0D2XD04|A0A0D2XD04_FUSO4 Uncharacterized protein OS=Fusarium oxysporum f. sp. lycopersici (strain 4287 / CBS 123668 / FGSC 9935 / NRRL 34936) OX=426428 GN=FOXG_01779 PE=4 SV=1	1	1	0.0153	71032.6	9.5
$1236-1	tr|A0A0D2XD05|A0A0D2XD05_FUSO4 MFS domain-containing protein OS=Fusarium oxysporum f. sp. lycopersici (strain 4287 / CBS 123668 / FGSC 9935 / NRRL 34936) OX=426428 PE=4 SV=1	1	1	0.0152	42522.8	9.96
$1237-1	tr|A0A0D2XD10|A0A0D2XD10_FUSO4 MFAP1 domain-containing protein OS=Fusarium oxysporum f. sp. lycopersici (strain 4287 / CBS 123668 / FGSC 9935 / NRRL 34936) OX=426428 GN=FOXG_01785 PE=4 SV=1	1	1	0.0129	54034.9	5.24
$1238-1	tr|A0A0D2XD11|A0A0D2XD11_FUSO4 DNA polymerase alpha subunit B OS=Fusarium oxysporum f. sp. lycopersici (strain 4287 / CBS 123668 / FGSC 9935 / NRRL 34936) OX=426428 PE=3 SV=1	1	1	0.0094	69630.5	5.16
$1239-1	tr|A0A0D2XD12|A0A0D2XD12_FUSO4 Uncharacterized protein OS=Fusarium oxysporum f. sp. lycopersici (strain 4287 / CBS 123668 / FGSC 9935 / NRRL 34936) OX=426428 GN=FOXG_01787 PE=4 SV=1	1	1	0.0062	138780	7.59
$1240-1	tr|A0A0D2XD36|A0A0D2XD36_FUSO4 SMI1_KNR4 domain-containing protein OS=Fusarium oxysporum f. sp. lycopersici (strain 4287 / CBS 123668 / FGSC 9935 / NRRL 34936) OX=426428 GN=FOXG_01811 PE=3 SV=1	1	1	0.0154	56905.3	5.32
$1241-1	tr|A0A0D2XD58|A0A0D2XD58_FUSO4 Uncharacterized protein OS=Fusarium oxysporum f. sp. lycopersici (strain 4287 / CBS 123668 / FGSC 9935 / NRRL 34936) OX=426428 GN=FOXG_01833 PE=4 SV=1	1	1	0.0122	70915.9	5.09
$1242-1	tr|A0A0D2XDA3|A0A0D2XDA3_FUSO4 Sarcosine oxidase OS=Fusarium oxysporum f. sp. lycopersici (strain 4287 / CBS 123668 / FGSC 9935 / NRRL 34936) OX=426428 GN=FOXG_01881 PE=4 SV=1	1	1	0.0263	41830.9	6.48
$1243-1	tr|A0A0D2XDC0|A0A0D2XDC0_FUSO4 ADP-ribosylation factor-like protein 1 OS=Fusarium oxysporum f. sp. lycopersici (strain 4287 / CBS 123668 / FGSC 9935 / NRRL 34936) OX=426428 GN=FOXG_01899 PE=3 SV=1	1	1	0.0333	19971.5	4.78
$1244-1	tr|A0A0D2XDD3|A0A0D2XDD3_FUSO4 Uncharacterized protein OS=Fusarium oxysporum f. sp. lycopersici (strain 4287 / CBS 123668 / FGSC 9935 / NRRL 34936) OX=426428 GN=FOXG_01912 PE=4 SV=1	1	1	0.0492	29831.5	5.42
$1245-1	tr|A0A0D2XDE7|A0A0D2XDE7_FUSO4 Uncharacterized protein OS=Fusarium oxysporum f. sp. lycopersici (strain 4287 / CBS 123668 / FGSC 9935 / NRRL 34936) OX=426428 GN=FOXG_01926 PE=3 SV=1	1	1	0.0195	33602.9	9.12
$1246-1	tr|A0A0D2XDF5|A0A0D2XDF5_FUSO4 Uncharacterized protein OS=Fusarium oxysporum f. sp. lycopersici (strain 4287 / CBS 123668 / FGSC 9935 / NRRL 34936) OX=426428 GN=FOXG_01934 PE=4 SV=1	1	1	0.007	110859	8.36
$1247-1	tr|A0A0D2XDG7|A0A0D2XDG7_FUSO4 CAMK/CAMK1/CAMK1-CMK protein kinase OS=Fusarium oxysporum f. sp. lycopersici (strain 4287 / CBS 123668 / FGSC 9935 / NRRL 34936) OX=426428 GN=FOXG_01946 PE=3 SV=1	1	1	0.0217	42186.8	6.78
$1247-2	tr|A0A0J9UCF2|A0A0J9UCF2_FUSO4 CAMK/CAMK1/CAMK1-CMK protein kinase OS=Fusarium oxysporum f. sp. lycopersici (strain 4287 / CBS 123668 / FGSC 9935 / NRRL 34936) OX=426428 GN=FOXG_01946 PE=3 SV=1	1	1	0.0283	32405.7	6.6
$1248-1	tr|A0A0D2XDL5|A0A0D2XDL5_FUSO4 Alpha-mannosidase OS=Fusarium oxysporum f. sp. lycopersici (strain 4287 / CBS 123668 / FGSC 9935 / NRRL 34936) OX=426428 PE=3 SV=1	1	1	0.0079	116064	5.93
$1248-2	tr|A0A0J9UCS5|A0A0J9UCS5_FUSO4 Alpha-mannosidase OS=Fusarium oxysporum f. sp. lycopersici (strain 4287 / CBS 123668 / FGSC 9935 / NRRL 34936) OX=426428 GN=FOXG_01995 PE=3 SV=1	1	1	0.0078	117004	5.67
$1249-1	tr|A0A0D2XDS3|A0A0D2XDS3_FUSO4 Uncharacterized protein OS=Fusarium oxysporum f. sp. lycopersici (strain 4287 / CBS 123668 / FGSC 9935 / NRRL 34936) OX=426428 GN=FOXG_02053 PE=4 SV=1	1	1	0.0606	18280.5	9.62
$1250-1	tr|A0A0D2XDS6|A0A0D2XDS6_FUSO4 Myb-like domain-containing protein OS=Fusarium oxysporum f. sp. lycopersici (strain 4287 / CBS 123668 / FGSC 9935 / NRRL 34936) OX=426428 GN=FOXG_02056 PE=4 SV=1	1	1	0.0121	63810.8	6.45
$1251-1	tr|A0A0D2XDT1|A0A0D2XDT1_FUSO4 Uncharacterized protein OS=Fusarium oxysporum f. sp. lycopersici (strain 4287 / CBS 123668 / FGSC 9935 / NRRL 34936) OX=426428 GN=FOXG_02061 PE=4 SV=1	1	1	0.0167	40608.8	8.18
$1252-1	tr|A0A0D2XDT2|A0A0D2XDT2_FUSO4 Uncharacterized protein OS=Fusarium oxysporum f. sp. lycopersici (strain 4287 / CBS 123668 / FGSC 9935 / NRRL 34936) OX=426428 GN=FOXG_02062 PE=4 SV=1	1	1	0.0364	30788.6	6.83
$1253-1	tr|A0A0D2XDT7|A0A0D2XDT7_FUSO4 Sacchrp_dh_NADP domain-containing protein OS=Fusarium oxysporum f. sp. lycopersici (strain 4287 / CBS 123668 / FGSC 9935 / NRRL 34936) OX=426428 PE=4 SV=1	1	1	0.0297	48141.8	6.43
$1253-2	tr|A0A0J9WHT1|A0A0J9WHT1_FUSO4 Uncharacterized protein OS=Fusarium oxysporum f. sp. lycopersici (strain 4287 / CBS 123668 / FGSC 9935 / NRRL 34936) OX=426428 GN=FOXG_02067 PE=4 SV=1	1	1	0.0438	32645.1	6.97
$1253-3	tr|A0A0J9UGT0|A0A0J9UGT0_FUSO4 Sacchrp_dh_NADP domain-containing protein OS=Fusarium oxysporum f. sp. lycopersici (strain 4287 / CBS 123668 / FGSC 9935 / NRRL 34936) OX=426428 GN=FOXG_02067 PE=4 SV=1	1	1	0.0307	46421.8	6.57
$1254-1	tr|A0A0D2XDV4|A0A0D2XDV4_FUSO4 Uncharacterized protein OS=Fusarium oxysporum f. sp. lycopersici (strain 4287 / CBS 123668 / FGSC 9935 / NRRL 34936) OX=426428 GN=FOXG_02084 PE=4 SV=1	1	1	0.0195	51406.2	8.75
$1255-1	tr|A0A0D2XDW3|A0A0D2XDW3_FUSO4 Mitochondrial distribution and morphology protein 34 OS=Fusarium oxysporum f. sp. lycopersici (strain 4287 / CBS 123668 / FGSC 9935 / NRRL 34936) OX=426428 GN=MDM34 PE=3 SV=1	1	1	0.0148	59377.2	5.41
$1256-1	tr|A0A0D2XDX1|A0A0D2XDX1_FUSO4 PH domain-containing protein OS=Fusarium oxysporum f. sp. lycopersici (strain 4287 / CBS 123668 / FGSC 9935 / NRRL 34936) OX=426428 PE=4 SV=1	1	1	0.0245	28276.6	9.71
$1256-2	tr|A0A0J9UE58|A0A0J9UE58_FUSO4 PH domain-containing protein OS=Fusarium oxysporum f. sp. lycopersici (strain 4287 / CBS 123668 / FGSC 9935 / NRRL 34936) OX=426428 GN=FOXG_18233 PE=4 SV=1	1	1	0.0044	153838	5.48
$1257-1	tr|A0A0D2XDX5|A0A0D2XDX5_FUSO4 Uncharacterized protein OS=Fusarium oxysporum f. sp. lycopersici (strain 4287 / CBS 123668 / FGSC 9935 / NRRL 34936) OX=426428 GN=FOXG_02106 PE=4 SV=1	1	1	0.0123	61978.4	6.38
$1258-1	tr|A0A0D2XDY2|A0A0D2XDY2_FUSO4 DUF2235 domain-containing protein OS=Fusarium oxysporum f. sp. lycopersici (strain 4287 / CBS 123668 / FGSC 9935 / NRRL 34936) OX=426428 GN=FOXG_02113 PE=4 SV=1	1	1	0.0297	26235.5	5.06
$1259-1	tr|A0A0D2XDZ0|A0A0D2XDZ0_FUSO4 40S ribosomal protein S12 OS=Fusarium oxysporum f. sp. lycopersici (strain 4287 / CBS 123668 / FGSC 9935 / NRRL 34936) OX=426428 GN=FOXG_02121 PE=3 SV=1	1	1	0.0616	16179.3	4.8
$1260-1	tr|A0A0D2XE31|A0A0D2XE31_FUSO4 Pyrroline-5-carboxylate reductase OS=Fusarium oxysporum f. sp. lycopersici (strain 4287 / CBS 123668 / FGSC 9935 / NRRL 34936) OX=426428 PE=3 SV=1	1	1	0.0372	33688.6	7.62
$1260-2	tr|A0A0J9UH66|A0A0J9UH66_FUSO4 Pyrroline-5-carboxylate reductase OS=Fusarium oxysporum f. sp. lycopersici (strain 4287 / CBS 123668 / FGSC 9935 / NRRL 34936) OX=426428 GN=FOXG_02162 PE=3 SV=1	1	1	0.035	35728.8	7.04
$1261-1	tr|A0A0D2XE36|A0A0D2XE36_FUSO4 Lectin, mannose-binding 2 OS=Fusarium oxysporum f. sp. lycopersici (strain 4287 / CBS 123668 / FGSC 9935 / NRRL 34936) OX=426428 GN=FOXG_02167 PE=4 SV=1	1	1	0.0311	35939.9	9.08
$1262-1	tr|A0A0D2XE53|A0A0D2XE53_FUSO4 PHD-type domain-containing protein OS=Fusarium oxysporum f. sp. lycopersici (strain 4287 / CBS 123668 / FGSC 9935 / NRRL 34936) OX=426428 PE=4 SV=1	1	1	0.0055	120647	6.35
$1262-2	tr|A0A0J9UFA1|A0A0J9UFA1_FUSO4 NuA3 HAT complex component NTO1 OS=Fusarium oxysporum f. sp. lycopersici (strain 4287 / CBS 123668 / FGSC 9935 / NRRL 34936) OX=426428 GN=FOXG_02184 PE=4 SV=1	1	1	0.0052	127949	6.64
$1263-1	tr|A0A0D2XE64|A0A0D2XE64_FUSO4 Uncharacterized protein OS=Fusarium oxysporum f. sp. lycopersici (strain 4287 / CBS 123668 / FGSC 9935 / NRRL 34936) OX=426428 GN=FOXG_02195 PE=4 SV=1	1	1	0.0031	176934	5.19
$1264-1	tr|A0A0D2XE99|A0A0D2XE99_FUSO4 U1 small nuclear ribonucleoprotein 70kDa OS=Fusarium oxysporum f. sp. lycopersici (strain 4287 / CBS 123668 / FGSC 9935 / NRRL 34936) OX=426428 GN=FOXG_02231 PE=4 SV=1	1	1	0.0153	43554.8	10.14
$1264-2	tr|A0A0J9VR27|A0A0J9VR27_FUSO4 Uncharacterized protein OS=Fusarium oxysporum f. sp. lycopersici (strain 4287 / CBS 123668 / FGSC 9935 / NRRL 34936) OX=426428 GN=FOXG_12881 PE=4 SV=1	1	1	0.0103	65104.9	5.66
$1265-1	tr|A0A0D2XEA8|A0A0D2XEA8_FUSO4 MICOS complex subunit MIC10 OS=Fusarium oxysporum f. sp. lycopersici (strain 4287 / CBS 123668 / FGSC 9935 / NRRL 34936) OX=426428 GN=FOXG_02240 PE=3 SV=1	1	1	0.1099	9930.41	9.92
$1266-1	tr|A0A0D2XEB0|A0A0D2XEB0_FUSO4 Uncharacterized protein OS=Fusarium oxysporum f. sp. lycopersici (strain 4287 / CBS 123668 / FGSC 9935 / NRRL 34936) OX=426428 GN=FOXG_02242 PE=4 SV=1	1	1	0.0346	37954.4	7.18
$1266-2	tr|A0A0J9UE27|A0A0J9UE27_FUSO4 Uncharacterized protein OS=Fusarium oxysporum f. sp. lycopersici (strain 4287 / CBS 123668 / FGSC 9935 / NRRL 34936) OX=426428 GN=FOXG_02242 PE=4 SV=1	1	1	0.0403	32801.4	7.76
$1267-1	tr|A0A0D2XEB1|A0A0D2XEB1_FUSO4 Uncharacterized protein OS=Fusarium oxysporum f. sp. lycopersici (strain 4287 / CBS 123668 / FGSC 9935 / NRRL 34936) OX=426428 PE=3 SV=1	1	1	0.0085	106436	6.35
$1267-2	tr|A0A0J9UEV8|A0A0J9UEV8_FUSO4 Uncharacterized protein OS=Fusarium oxysporum f. sp. lycopersici (strain 4287 / CBS 123668 / FGSC 9935 / NRRL 34936) OX=426428 GN=FOXG_18264 PE=3 SV=1	1	1	0.0072	126277	6.55
$1268-1	tr|A0A0D2XEC2|A0A0D2XEC2_FUSO4 Endonuclease OS=Fusarium oxysporum f. sp. lycopersici (strain 4287 / CBS 123668 / FGSC 9935 / NRRL 34936) OX=426428 GN=FOXG_02254 PE=3 SV=1	1	1	0.026	37701.5	9.01
$1269-1	tr|A0A0D2XEC8|A0A0D2XEC8_FUSO4 UDENN domain-containing protein OS=Fusarium oxysporum f. sp. lycopersici (strain 4287 / CBS 123668 / FGSC 9935 / NRRL 34936) OX=426428 PE=3 SV=1	1	1	0.0178	88814.3	5.64
$1269-2	tr|A0A0J9UE63|A0A0J9UE63_FUSO4 UDENN domain-containing protein OS=Fusarium oxysporum f. sp. lycopersici (strain 4287 / CBS 123668 / FGSC 9935 / NRRL 34936) OX=426428 GN=FOXG_02260 PE=3 SV=1	1	1	0.0166	95108	5.94
$1270-1	tr|A0A0D2XED3|A0A0D2XED3_FUSO4 Uncharacterized protein OS=Fusarium oxysporum f. sp. lycopersici (strain 4287 / CBS 123668 / FGSC 9935 / NRRL 34936) OX=426428 PE=4 SV=1	1	1	0.0119	76450.2	6.11
$1270-2	tr|A0A0J9UEZ5|A0A0J9UEZ5_FUSO4 Uncharacterized protein OS=Fusarium oxysporum f. sp. lycopersici (strain 4287 / CBS 123668 / FGSC 9935 / NRRL 34936) OX=426428 GN=FOXG_02265 PE=4 SV=1	1	1	0.0111	81766.1	5.79
$1271-1	tr|A0A0D2XEE0|A0A0D2XEE0_FUSO4 Actin-related protein 8 OS=Fusarium oxysporum f. sp. lycopersici (strain 4287 / CBS 123668 / FGSC 9935 / NRRL 34936) OX=426428 GN=FOXG_02272 PE=3 SV=1	1	1	0.0081	83346.4	5.57
$1272-1	tr|A0A0D2XEF6|A0A0D2XEF6_FUSO4 Uncharacterized protein OS=Fusarium oxysporum f. sp. lycopersici (strain 4287 / CBS 123668 / FGSC 9935 / NRRL 34936) OX=426428 PE=4 SV=1	1	1	0.0068	163004	9.58
$1272-2	tr|A0A0J9UHX3|A0A0J9UHX3_FUSO4 Uncharacterized protein OS=Fusarium oxysporum f. sp. lycopersici (strain 4287 / CBS 123668 / FGSC 9935 / NRRL 34936) OX=426428 GN=FOXG_02288 PE=4 SV=1	1	1	0.0068	163392	9.58
$1273-1	tr|A0A0D2XEF7|A0A0D2XEF7_FUSO4 Uncharacterized protein OS=Fusarium oxysporum f. sp. lycopersici (strain 4287 / CBS 123668 / FGSC 9935 / NRRL 34936) OX=426428 GN=FOXG_02289 PE=4 SV=1	1	1	0.0118	63853.9	8.29
$1274-1	tr|A0A0D2XEG1|A0A0D2XEG1_FUSO4 ATP synthase subunit delta, mitochondrial OS=Fusarium oxysporum f. sp. lycopersici (strain 4287 / CBS 123668 / FGSC 9935 / NRRL 34936) OX=426428 GN=FOXG_02293 PE=3 SV=1	1	1	0.0909	17732.9	5.43
$1275-1	tr|A0A0D2XEG8|A0A0D2XEG8_FUSO4 Translocation protein SEC63 OS=Fusarium oxysporum f. sp. lycopersici (strain 4287 / CBS 123668 / FGSC 9935 / NRRL 34936) OX=426428 GN=FOXG_02300 PE=4 SV=1	1	1	0.0158	77973.4	5.17
$1276-1	tr|A0A0D2XEM9|A0A0D2XEM9_FUSO4 Uncharacterized protein OS=Fusarium oxysporum f. sp. lycopersici (strain 4287 / CBS 123668 / FGSC 9935 / NRRL 34936) OX=426428 GN=FOXG_02365 PE=4 SV=1	1	1	0.0184	37012.1	7.62
$1277-1	tr|A0A0D2XEP1|A0A0D2XEP1_FUSO4 NFACT-R_1 domain-containing protein OS=Fusarium oxysporum f. sp. lycopersici (strain 4287 / CBS 123668 / FGSC 9935 / NRRL 34936) OX=426428 PE=3 SV=1	1	1	0.0242	24434.2	7.8
$1277-2	tr|A0A0J9UGA8|A0A0J9UGA8_FUSO4 NFACT-R_1 domain-containing protein OS=Fusarium oxysporum f. sp. lycopersici (strain 4287 / CBS 123668 / FGSC 9935 / NRRL 34936) OX=426428 GN=FOXG_02377 PE=3 SV=1	1	1	0.0311	19067.1	6.02
$1278-1	tr|A0A0D2XEQ7|A0A0D2XEQ7_FUSO4 Uncharacterized protein OS=Fusarium oxysporum f. sp. lycopersici (strain 4287 / CBS 123668 / FGSC 9935 / NRRL 34936) OX=426428 PE=4 SV=1	1	1	0.1724	6627.56	7.98
$1278-2	tr|A0A0J9UID7|A0A0J9UID7_FUSO4 FAD-binding FR-type domain-containing protein OS=Fusarium oxysporum f. sp. lycopersici (strain 4287 / CBS 123668 / FGSC 9935 / NRRL 34936) OX=426428 GN=FOXG_18310 PE=4 SV=1	1	1	0.0162	69771.9	9.16
$1279-1	tr|A0A0D2XER1|A0A0D2XER1_FUSO4 Uncharacterized protein OS=Fusarium oxysporum f. sp. lycopersici (strain 4287 / CBS 123668 / FGSC 9935 / NRRL 34936) OX=426428 GN=FOXG_02398 PE=4 SV=1	1	1	0.0204	39830.7	9.99
$1280-1	tr|A0A0D2XER8|A0A0D2XER8_FUSO4 Catalase OS=Fusarium oxysporum f. sp. lycopersici (strain 4287 / CBS 123668 / FGSC 9935 / NRRL 34936) OX=426428 GN=FOXG_02405 PE=3 SV=1	1	1	0.0095	82715	5.9
$1281-1	tr|A0A0D2XES0|A0A0D2XES0_FUSO4 Uncharacterized protein OS=Fusarium oxysporum f. sp. lycopersici (strain 4287 / CBS 123668 / FGSC 9935 / NRRL 34936) OX=426428 PE=4 SV=1	1	1	0.0957	13239.9	5.27
$1282-1	tr|A0A0D2XET8|A0A0D2XET8_FUSO4 DAO domain-containing protein OS=Fusarium oxysporum f. sp. lycopersici (strain 4287 / CBS 123668 / FGSC 9935 / NRRL 34936) OX=426428 GN=FOXG_02425 PE=4 SV=1	1	1	0.0186	47259	8.75
$1283-1	tr|A0A0D2XEV7|A0A0D2XEV7_FUSO4 Alcohol dehydrogenase OS=Fusarium oxysporum f. sp. lycopersici (strain 4287 / CBS 123668 / FGSC 9935 / NRRL 34936) OX=426428 GN=FOXG_02444 PE=3 SV=1	1	1	0.0225	37912.2	6.12
$1284-1	tr|A0A0D2XEW9|A0A0D2XEW9_FUSO4 Carrier domain-containing protein OS=Fusarium oxysporum f. sp. lycopersici (strain 4287 / CBS 123668 / FGSC 9935 / NRRL 34936) OX=426428 PE=4 SV=1	1	1	0.0069	109600	6.25
$1284-2	tr|A0A0J9UF12|A0A0J9UF12_FUSO4 Nonribosomal peptide synthetase OS=Fusarium oxysporum f. sp. lycopersici (strain 4287 / CBS 123668 / FGSC 9935 / NRRL 34936) OX=426428 GN=FOXG_02458 PE=4 SV=1	1	1	0.0056	135288	5.84
$1285-1	tr|A0A0D2XEY4|A0A0D2XEY4_FUSO4 CBM21 domain-containing protein OS=Fusarium oxysporum f. sp. lycopersici (strain 4287 / CBS 123668 / FGSC 9935 / NRRL 34936) OX=426428 GN=FOXG_02473 PE=4 SV=1	1	1	0.008	80948.6	9.49
$1285-2	tr|A0A0J9UIN7|A0A0J9UIN7_FUSO4 CBM21 domain-containing protein OS=Fusarium oxysporum f. sp. lycopersici (strain 4287 / CBS 123668 / FGSC 9935 / NRRL 34936) OX=426428 GN=FOXG_02473 PE=4 SV=1	1	1	0.009	72439.7	9.56
$1286-1	tr|A0A0D2XF22|A0A0D2XF22_FUSO4 Amidohydro_3 domain-containing protein OS=Fusarium oxysporum f. sp. lycopersici (strain 4287 / CBS 123668 / FGSC 9935 / NRRL 34936) OX=426428 PE=4 SV=1	1	1	0.0329	23130.2	5.52
$1286-2	tr|A0A0J9UF83|A0A0J9UF83_FUSO4 Uncharacterized protein OS=Fusarium oxysporum f. sp. lycopersici (strain 4287 / CBS 123668 / FGSC 9935 / NRRL 34936) OX=426428 GN=FOXG_02511 PE=4 SV=1	1	1	0.0175	43763.8	9.63
$1287-1	tr|A0A0D2XF24|A0A0D2XF24_FUSO4 Amb_all domain-containing protein OS=Fusarium oxysporum f. sp. lycopersici (strain 4287 / CBS 123668 / FGSC 9935 / NRRL 34936) OX=426428 PE=3 SV=1	1	1	0.0341	38355.8	9.74
$1288-1	tr|A0A0D2XF28|A0A0D2XF28_FUSO4 Uncharacterized protein OS=Fusarium oxysporum f. sp. lycopersici (strain 4287 / CBS 123668 / FGSC 9935 / NRRL 34936) OX=426428 PE=4 SV=1	1	1	0.0583	11505.1	9.27
$1288-2	tr|A0A0J9UIV1|A0A0J9UIV1_FUSO4 Uncharacterized protein OS=Fusarium oxysporum f. sp. lycopersici (strain 4287 / CBS 123668 / FGSC 9935 / NRRL 34936) OX=426428 GN=FOXG_18336 PE=4 SV=1	1	1	0.0349	19450.2	9.03
$1289-1	tr|A0A0D2XF31|A0A0D2XF31_FUSO4 Uncharacterized protein OS=Fusarium oxysporum f. sp. lycopersici (strain 4287 / CBS 123668 / FGSC 9935 / NRRL 34936) OX=426428 GN=FOXG_02520 PE=4 SV=1	1	1	0.0254	26980.5	5.83
$1290-1	tr|A0A0D2XF35|A0A0D2XF35_FUSO4 FAD-binding PCMH-type domain-containing protein OS=Fusarium oxysporum f. sp. lycopersici (strain 4287 / CBS 123668 / FGSC 9935 / NRRL 34936) OX=426428 GN=FOXG_02524 PE=3 SV=1	1	1	0.0098	78081.5	4.84
$1291-1	tr|A0A0D2XF47|A0A0D2XF47_FUSO4 MFS domain-containing protein OS=Fusarium oxysporum f. sp. lycopersici (strain 4287 / CBS 123668 / FGSC 9935 / NRRL 34936) OX=426428 GN=FOXG_02536 PE=4 SV=1	1	1	0.0125	52880.1	6.96
$1292-1	tr|A0A0D2XF57|A0A0D2XF57_FUSO4 Uncharacterized protein OS=Fusarium oxysporum f. sp. lycopersici (strain 4287 / CBS 123668 / FGSC 9935 / NRRL 34936) OX=426428 GN=FOXG_02546 PE=4 SV=1	1	1	0.0352	28141.2	8.55
$1293-1	tr|A0A0D2XFD5|A0A0D2XFD5_FUSO4 Zn(2)-C6 fungal-type domain-containing protein OS=Fusarium oxysporum f. sp. lycopersici (strain 4287 / CBS 123668 / FGSC 9935 / NRRL 34936) OX=426428 PE=4 SV=1	1	1	0.0079	85481.8	6.38
$1293-2	tr|A0A0J9UGI0|A0A0J9UGI0_FUSO4 Zn(2)-C6 fungal-type domain-containing protein OS=Fusarium oxysporum f. sp. lycopersici (strain 4287 / CBS 123668 / FGSC 9935 / NRRL 34936) OX=426428 GN=FOXG_02624 PE=4 SV=1	1	1	0.0078	86239.7	6.38
$1294-1	tr|A0A0D2XFJ2|A0A0D2XFJ2_FUSO4 Cytochrome P450 oxidoreductase OS=Fusarium oxysporum f. sp. lycopersici (strain 4287 / CBS 123668 / FGSC 9935 / NRRL 34936) OX=426428 GN=FOXG_02681 PE=3 SV=1	1	1	0.0133	59273.5	7.99
$1295-1	tr|A0A0D2XFT6|A0A0D2XFT6_FUSO4 Uncharacterized protein OS=Fusarium oxysporum f. sp. lycopersici (strain 4287 / CBS 123668 / FGSC 9935 / NRRL 34936) OX=426428 PE=4 SV=1	1	1	0.0281	35892.8	9.12
$1295-2	tr|A0A0J9UG75|A0A0J9UG75_FUSO4 Uncharacterized protein OS=Fusarium oxysporum f. sp. lycopersici (strain 4287 / CBS 123668 / FGSC 9935 / NRRL 34936) OX=426428 GN=FOXG_02775 PE=4 SV=1	1	1	0.0294	34488.2	9.12
$1296-1	tr|A0A0D2XFY3|A0A0D2XFY3_FUSO4 Uncharacterized protein OS=Fusarium oxysporum f. sp. lycopersici (strain 4287 / CBS 123668 / FGSC 9935 / NRRL 34936) OX=426428 GN=FOXG_02822 PE=3 SV=1	1	1	0.021	58968.6	5.2
$1297-1	tr|A0A0D2XG22|A0A0D2XG22_FUSO4 DAO domain-containing protein OS=Fusarium oxysporum f. sp. lycopersici (strain 4287 / CBS 123668 / FGSC 9935 / NRRL 34936) OX=426428 PE=3 SV=1	1	1	0.0161	40642.7	6.73
$1297-2	tr|A0A0J9UK28|A0A0J9UK28_FUSO4 DAO domain-containing protein OS=Fusarium oxysporum f. sp. lycopersici (strain 4287 / CBS 123668 / FGSC 9935 / NRRL 34936) OX=426428 GN=FOXG_02863 PE=3 SV=1	1	1	0.0149	44108.8	8.27
$1298-1	tr|A0A0D2XG83|A0A0D2XG83_FUSO4 Uncharacterized protein OS=Fusarium oxysporum f. sp. lycopersici (strain 4287 / CBS 123668 / FGSC 9935 / NRRL 34936) OX=426428 PE=4 SV=1	1	1	0.0288	24023.6	5.74
$1298-2	tr|A0A0J9WII9|A0A0J9WII9_FUSO4 Uncharacterized protein OS=Fusarium oxysporum f. sp. lycopersici (strain 4287 / CBS 123668 / FGSC 9935 / NRRL 34936) OX=426428 GN=FOXG_02925 PE=4 SV=1	1	1	0.0302	22985.6	6.6
[truncated: 2,226 more rows]

## Sheet: Supplementary File 1b
Supplementary File 2. Target proteins obtained from the GFP copurified LC-MS/MS data.
[truncated: 4,250 more rows]

[truncated: 2 more sheets: Supplementary File 1c, Supplementary File 1d]
